# Supplementary material for: Rhizobium etli CFN42 and Sinorhizobium meliloti 1021 bioinformatic transcriptional regulatory networks from culture and symbiosis
Source: Front Bioinform. 2024 Aug 28;4:1419274. doi: 10.3389/fbinf.2024.1419274 (PMC11387232; doi:10.3389/fbinf.2024.1419274)
Supplement: Supplementary file 1 [file Table2.xlsx]

## Sheet: Hoja1
a) Free-living Matrix-clustering S. meliloti 1021										b) Bacteroid Matrix-clustering S. meliloti 1021
296 clusters							Data for network			181 clusters								Data for Network
Free-living	TFs from clusters		681 Unique Targets		260 Unique Tfs		Mix Unique Targets and TFs	260 Unique Tfs		Bacteroid	TFs from clusters		372 Unique Targets		210 Unique Tfs			Mix Unique Targets and TFs	210 Unique Tfs
cluster_2			SM_b20004		SM_b20004		SM_b20004	SM_b20004		cluster_4			SM_b20004		SMc01260			SM_b20004	SMc01260
SMc01121			SM_b20020		SM_b20021		SM_b20020	SM_b20021		SMc00041			SM_b20033		SM_b20004			SM_b20033	SM_b20004
SM_b20457	SM_b20457		SM_b20021		SM_b20033		SM_b20021	SM_b20033		SMc02391			SM_b20047		SM_b20033			SM_b20047	SM_b20033
SMc03881			SM_b20033		SM_b20039		SM_b20033	SM_b20039		SMc01260	SMc01260		SM_b20049		SM_b20055			SM_b20049	SM_b20055
SMc03891			SM_b20039		SM_b20048		SM_b20039	SM_b20048		SMc02162			SM_b20055		SM_b20106			SM_b20055	SM_b20106
SMc03890	SMc03890		SM_b20048		SM_b20055		SM_b20048	SM_b20055		SMc02229			SM_b20106		SM_b20154			SM_b20106	SM_b20154
			SM_b20055		SM_b20106		SM_b20055	SM_b20106					SM_b20154		SM_b20162			SM_b20154	SM_b20162
			SM_b20056		SM_b20123		SM_b20056	SM_b20123					SM_b20162		SM_b20203			SM_b20162	SM_b20203
			SM_b20069		SM_b20129		SM_b20069	SM_b20129					SM_b20203		SM_b20219			SM_b20203	SM_b20219
			SM_b20072		SM_b20154		SM_b20072	SM_b20154					SM_b20219		SM_b20276			SM_b20219	SM_b20276
cluster_3			SM_b20106		SM_b20162		SM_b20106	SM_b20162		cluster_6			SM_b20231		SM_b20344			SM_b20231	SM_b20344
SMc01260	SMc01260		SM_b20123		SM_b20203		SM_b20123	SM_b20203		SMc04162	SMc04162		SM_b20232		SM_b20347			SM_b20232	SM_b20347
SMc00100			SM_b20129		SM_b20211		SM_b20129	SM_b20211		SMc03843	SMc03843		SM_b20255		SM_b20366			SM_b20255	SM_b20366
			SM_b20154		SM_b20215		SM_b20154	SM_b20215					SM_b20276		SM_b20367			SM_b20276	SM_b20367
			SM_b20162		SM_b20219		SM_b20162	SM_b20219					SM_b20331		SM_b20375			SM_b20331	SM_b20375
			SM_b20203		SM_b20258		SM_b20203	SM_b20258					SM_b20340		SM_b20392			SM_b20340	SM_b20392
			SM_b20211		SM_b20276		SM_b20211	SM_b20276					SM_b20344		SM_b20425			SM_b20344	SM_b20425
cluster_9			SM_b20215		SM_b20285		SM_b20215	SM_b20285		cluster_7			SM_b20347		SM_b20426			SM_b20347	SM_b20426
SM_b20875			SM_b20219		SM_b20337		SM_b20219	SM_b20337		SMa0520	SMa0520		SM_b20365		SM_b20441			SM_b20365	SM_b20441
SMc01908	SMc01908		SM_b20258		SM_b20347		SM_b20258	SM_b20347		SMa1334			SM_b20366		SM_b20455			SM_b20366	SM_b20455
SMc04198			SM_b20262		SM_b20366		SM_b20262	SM_b20366		SMa5030	SMa5030		SM_b20367		SM_b20457			SM_b20367	SM_b20457
SM_b20901	SM_b20901		SM_b20263		SM_b20367		SM_b20263	SM_b20367		SMa1387	SMa1387		SM_b20375		SM_b20509			SM_b20375	SM_b20509
SM_b20258	SM_b20258		SM_b20264		SM_b20387		SM_b20264	SM_b20387		SMa1480	SMa1480		SM_b20392		SM_b20516			SM_b20392	SM_b20516
SMc01327			SM_b20276		SM_b20392		SM_b20276	SM_b20392		SMa0661			SM_b20425		SM_b20525			SM_b20425	SM_b20525
			SM_b20285		SM_b20426		SM_b20285	SM_b20426		SMa0307	SMa0307		SM_b20426		SM_b20531			SM_b20426	SM_b20531
			SM_b20292		SM_b20441		SM_b20292	SM_b20441		SMa0372	SMa0372		SM_b20441		SM_b20537			SM_b20441	SM_b20537
			SM_b20337		SM_b20455		SM_b20337	SM_b20455					SM_b20455		SM_b20582			SM_b20455	SM_b20582
			SM_b20347		SM_b20457		SM_b20347	SM_b20457					SM_b20457		SM_b20586			SM_b20457	SM_b20586
cluster_12			SM_b20366		SM_b20457		SM_b20366	SM_b20457					SM_b20465		SM_b20592			SM_b20465	SM_b20592
SMc03060	SMc03060		SM_b20367		SM_b20494		SM_b20367	SM_b20494					SM_b20484		SM_b20608			SM_b20484	SM_b20608
SMc03061			SM_b20387		SM_b20509		SM_b20387	SM_b20509		cluster_10			SM_b20508		SM_b20674			SM_b20508	SM_b20674
			SM_b20392		SM_b20516		SM_b20392	SM_b20516		SMa0193			SM_b20509		SM_b20683			SM_b20509	SM_b20683
			SM_b20426		SM_b20525		SM_b20426	SM_b20525		SM_b21208	SM_b21208		SM_b20515		SM_b20717			SM_b20515	SM_b20717
			SM_b20441		SM_b20531		SM_b20441	SM_b20531		SM_b20608	SM_b20608		SM_b20516		SM_b20722			SM_b20516	SM_b20722
			SM_b20448		SM_b20537		SM_b20448	SM_b20537					SM_b20521		SM_b20817			SM_b20521	SM_b20817
cluster_13			SM_b20455		SM_b20582		SM_b20455	SM_b20582					SM_b20522		SM_b20859			SM_b20522	SM_b20859
SMc00720			SM_b20456		SM_b20586		SM_b20456	SM_b20586					SM_b20525		SM_b20869			SM_b20525	SM_b20869
SMc03165	SMc03165		SM_b20457		SM_b20667		SM_b20457	SM_b20667					SM_b20531		SM_b20896			SM_b20531	SM_b20896
			SM_b20494		SM_b20674		SM_b20494	SM_b20674		cluster_14			SM_b20537		SM_b20901			SM_b20537	SM_b20901
			SM_b20509		SM_b20683		SM_b20509	SM_b20683		SM_b20717	SM_b20717		SM_b20582		SM_b20947			SM_b20582	SM_b20947
			SM_b20516		SM_b20722		SM_b20516	SM_b20722		SM_b21598	SM_b21598		SM_b20586		SM_b21021			SM_b20586	SM_b21021
			SM_b20523		SM_b20758		SM_b20523	SM_b20758					SM_b20592		SM_b21079			SM_b20592	SM_b21079
cluster_16			SM_b20525		SM_b20773		SM_b20525	SM_b20773					SM_b20608		SM_b21093			SM_b20608	SM_b21093
SMa0089			SM_b20531		SM_b20817		SM_b20531	SM_b20817					SM_b20615		SM_b21102			SM_b20615	SM_b21102
SM_b20337	SM_b20337		SM_b20537		SM_b20859		SM_b20537	SM_b20859					SM_b20647		SM_b21115			SM_b20647	SM_b21115
SM_b20263			SM_b20556		SM_b20896		SM_b20556	SM_b20896		cluster_23			SM_b20665		SM_b21117			SM_b20665	SM_b21117
SMc02844	SMc02844		SM_b20582		SM_b20901		SM_b20582	SM_b20901		SM_b20818			SM_b20673		SM_b21158			SM_b20673	SM_b21158
			SM_b20586		SM_b20935		SM_b20586	SM_b20935		SMc00163	SMc00163		SM_b20674		SM_b21169			SM_b20674	SM_b21169
			SM_b20667		SM_b21008		SM_b20667	SM_b21008		SM_b20817	SM_b20817		SM_b20683		SM_b21180			SM_b20683	SM_b21180
			SM_b20674		SM_b21021		SM_b20674	SM_b21021					SM_b20717		SM_b21208			SM_b20717	SM_b21208
			SM_b20683		SM_b21079		SM_b20683	SM_b21079					SM_b20722		SM_b21210			SM_b20722	SM_b21210
cluster_18			SM_b20705		SM_b21080		SM_b20705	SM_b21080					SM_b20817		SM_b21222			SM_b20817	SM_b21222
SMc02306			SM_b20712		SM_b21093		SM_b20712	SM_b21093					SM_b20818		SM_b21291			SM_b20818	SM_b21291
SMc02396			SM_b20722		SM_b21102		SM_b20722	SM_b21102		cluster_27			SM_b20819		SM_b21299			SM_b20819	SM_b21299
SMc02175	SMc02175		SM_b20749		SM_b21115		SM_b20749	SM_b21115		SMc04315	SMc04315		SM_b20820		SM_b21336			SM_b20820	SM_b21336
SMc01781			SM_b20755		SM_b21117		SM_b20755	SM_b21117		SMc04163	SMc04163		SM_b20827		SM_b21346			SM_b20827	SM_b21346
SMc03899			SM_b20758		SM_b21158		SM_b20758	SM_b21158		SMc01592	SMc01592		SM_b20843		SM_b21359			SM_b20843	SM_b21359
SMc01782			SM_b20759		SM_b21169		SM_b20759	SM_b21169		SM_b21222	SM_b21222		SM_b20859		SM_b21372			SM_b20859	SM_b21372
SMc02818			SM_b20773		SM_b21180		SM_b20773	SM_b21180					SM_b20869		SM_b21385			SM_b20869	SM_b21385
SM_b20276	SM_b20276		SM_b20806		SM_b21187		SM_b20806	SM_b21187					SM_b20896		SM_b21464			SM_b20896	SM_b21464
SMc00100			SM_b20808		SM_b21208		SM_b20808	SM_b21208					SM_b20901		SM_b21484			SM_b20901	SM_b21484
			SM_b20817		SM_b21210		SM_b20817	SM_b21210					SM_b20914		SM_b21493			SM_b20914	SM_b21493
			SM_b20824		SM_b21222		SM_b20824	SM_b21222		cluster_29			SM_b20947		SM_b21533			SM_b20947	SM_b21533
			SM_b20859		SM_b21270		SM_b20859	SM_b21270		SMa1207	SMa1207		SM_b20953		SM_b21535			SM_b20953	SM_b21535
			SM_b20873		SM_b21272		SM_b20873	SM_b21272		SMa1118			SM_b21021		SM_b21569			SM_b21021	SM_b21569
cluster_21			SM_b20875		SM_b21299		SM_b20875	SM_b21299		SMa1169			SM_b21079		SM_b21579			SM_b21079	SM_b21579
SM_b20441	SM_b20441		SM_b20894		SM_b21336		SM_b20894	SM_b21336		SMa1211			SM_b21093		SM_b21598			SM_b21093	SM_b21598
SMc00830			SM_b20896		SM_b21346		SM_b20896	SM_b21346		SMa1201			SM_b21102		SM_b21641			SM_b21102	SM_b21641
SMc00831	SMc00831		SM_b20899		SM_b21359		SM_b20899	SM_b21359		SMa0690			SM_b21115		SM_b21649			SM_b21115	SM_b21649
SMc00829	SMc00829		SM_b20901		SM_b21372		SM_b20901	SM_b21372		SMa1154			SM_b21117		SM_b21650			SM_b21117	SM_b21650
			SM_b20935		SM_b21419		SM_b20935	SM_b21419		SMa0661			SM_b21158		SM_b21706			SM_b21158	SM_b21706
			SM_b20942		SM_b21464		SM_b20942	SM_b21464		SMa0667			SM_b21169		SMa0062			SM_b21169	SMa0062
			SM_b20946		SM_b21484		SM_b20946	SM_b21484		SMa1231			SM_b21180		SMa0063			SM_b21180	SMa0063
			SM_b20949		SM_b21493		SM_b20949	SM_b21493		SMa0636			SM_b21208		SMa0065			SM_b21208	SMa0065
cluster_25			SM_b20999		SM_b21525		SM_b20999	SM_b21525		SMa1082			SM_b21210		SMa0097			SM_b21210	SMa0097
SMc03879			SM_b21008		SM_b21533		SM_b21008	SM_b21533		SMa1100			SM_b21222		SMa0179			SM_b21222	SMa0179
SM_b21115	SM_b21115		SM_b21009		SM_b21559		SM_b21009	SM_b21559		SMa1136			SM_b21291		SMa0190			SM_b21291	SMa0190
SM_b20946			SM_b21010		SM_b21569		SM_b21010	SM_b21569					SM_b21294		SMa0222			SM_b21294	SMa0222
SMc01834			SM_b21021		SM_b21576		SM_b21021	SM_b21576					SM_b21295		SMa0246			SM_b21295	SMa0246
SM_b21010			SM_b21035		SM_b21598		SM_b21035	SM_b21598					SM_b21299		SMa0267			SM_b21299	SMa0267
SMc00300			SM_b21079		SM_b21601		SM_b21079	SM_b21601					SM_b21300		SMa0307			SM_b21300	SMa0307
SMc03061			SM_b21080		SM_b21641		SM_b21080	SM_b21641		cluster_33			SM_b21333		SMa0319			SM_b21333	SMa0319
SMc03998	SMc03998		SM_b21093		SM_b21650		SM_b21093	SM_b21650		SM_b20947	SM_b20947		SM_b21336		SMa0347			SM_b21336	SMa0347
SMc03060	SMc03060		SM_b21102		SM_b21706		SM_b21102	SM_b21706		SMc01195			SM_b21345		SMa0355			SM_b21345	SMa0355
SMc00409			SM_b21112		SMa0063		SM_b21112	SMa0063					SM_b21346		SMa0372			SM_b21346	SMa0372
SMc02753			SM_b21115		SMa0078		SM_b21115	SMa0078					SM_b21359		SMa0498			SM_b21359	SMa0498
			SM_b21117		SMa0097		SM_b21117	SMa0097					SM_b21372		SMa0520			SM_b21372	SMa0520
			SM_b21158		SMa0114		SM_b21158	SMa0114					SM_b21385		SMa0748			SM_b21385	SMa0748
			SM_b21169		SMa0179		SM_b21169	SMa0179		cluster_37			SM_b21400		SMa0750			SM_b21400	SMa0750
			SM_b21177		SMa0190		SM_b21177	SMa0190		SM_b20525	SM_b20525		SM_b21442		SMa0789			SM_b21442	SMa0789
cluster_28			SM_b21180		SMa0222		SM_b21180	SMa0222		SM_b21521			SM_b21464		SMa0815			SM_b21464	SMa0815
SMc02240			SM_b21181		SMa0246		SM_b21181	SMa0246					SM_b21484		SMa0849			SM_b21484	SMa0849
SMc04323			SM_b21183		SMa0281		SM_b21183	SMa0281					SM_b21493		SMa0985			SM_b21493	SMa0985
SMc01592	SMc01592		SM_b21185		SMa0303		SM_b21185	SMa0303					SM_b21521		SMa1207			SM_b21521	SMa1207
SM_b21222	SM_b21222		SM_b21186		SMa0307		SM_b21186	SMa0307					SM_b21533		SMa1299			SM_b21533	SMa1299
			SM_b21187		SMa0319		SM_b21187	SMa0319		cluster_40			SM_b21535		SMa1387			SM_b21535	SMa1387
			SM_b21196		SMa0347		SM_b21196	SMa0347		SMa1334			SM_b21569		SMa1442			SM_b21569	SMa1442
			SM_b21197		SMa0355		SM_b21197	SMa0355		SMa5030	SMa5030		SM_b21574		SMa1454			SM_b21574	SMa1454
			SM_b21208		SMa0372		SM_b21208	SMa0372		SMc03890	SMc03890		SM_b21579		SMa1480			SM_b21579	SMa1480
cluster_31			SM_b21210		SMa0402		SM_b21210	SMa0402		SM_b20366	SM_b20366		SM_b21598		SMa1505			SM_b21598	SMa1505
SM_b21346	SM_b21346		SM_b21222		SMa0498		SM_b21222	SMa0498		SM_b20365			SM_b21640		SMa1632			SM_b21640	SMa1632
SMa0247			SM_b21270		SMa0520		SM_b21270	SMa0520		SM_b21385	SM_b21385		SM_b21641		SMa1688			SM_b21641	SMa1688
SMc02451			SM_b21272		SMa0557		SM_b21272	SMa0557					SM_b21647		SMa1749			SM_b21647	SMa1749
SMc04458			SM_b21299		SMa0748		SM_b21299	SMa0748					SM_b21649		SMa1893			SM_b21649	SMa1893
SMc00813			SM_b21317		SMa0815		SM_b21317	SMa0815					SM_b21650		SMa1948			SM_b21650	SMa1948
SM_b20674	SM_b20674		SM_b21336		SMa0849		SM_b21336	SMa0849					SM_b21683		SMa1954			SM_b21683	SMa1954
SMc00879	SMc00879		SM_b21346		SMa0955		SM_b21346	SMa0955		cluster_41			SM_b21706		SMa1966			SM_b21706	SMa1966
SM_b21183			SM_b21359		SMa1067		SM_b21359	SMa1067		SM_b20344	SM_b20344		SMa0062		SMa2008			SMa0062	SMa2008
SMc00683			SM_b21372		SMa1207		SM_b21372	SMa1207		SMc00679	SMc00679		SMa0063		SMa2015			SMa0063	SMa2015
SMc00762			SM_b21419		SMa1299		SM_b21419	SMa1299		SMc00479	SMc00479		SMa0065		SMa2049			SMa0065	SMa2049
SMc03770			SM_b21464		SMa1387		SM_b21464	SMa1387		SM_b21385	SM_b21385		SMa0097		SMa2163			SMa0097	SMa2163
SMc00410			SM_b21479		SMa1442		SM_b21479	SMa1442					SMa0123		SMa2215			SMa0123	SMa2215
			SM_b21484		SMa1454		SM_b21484	SMa1454					SMa0179		SMa2303			SMa0179	SMa2303
			SM_b21491		SMa1480		SM_b21491	SMa1480					SMa0190		SMa5007			SMa0190	SMa5007
			SM_b21493		SMa1602		SM_b21493	SMa1602					SMa0193		SMa5030			SMa0193	SMa5030
			SM_b21494		SMa1705		SM_b21494	SMa1705		cluster_46			SMa0222		SMc00095			SMa0222	SMc00095
cluster_34			SM_b21514		SMa1720		SM_b21514	SMa1720		SMa1948	SMa1948		SMa0229		SMc00107			SMa0229	SMc00107
SM_b20749			SM_b21523		SMa1726		SM_b21523	SMa1726		SMc00109	SMc00109		SMa0232		SMc00109			SMa0232	SMc00109
SMa5030	SMa5030		SM_b21525		SMa1736		SM_b21525	SMa1736					SMa0246		SMc00146			SMa0246	SMc00146
SMc04251			SM_b21533		SMa1749		SM_b21533	SMa1749					SMa0267		SMc00163			SMa0267	SMc00163
SMc03923			SM_b21559		SMa1893		SM_b21559	SMa1893					SMa0307		SMc00241			SMa0307	SMc00241
SMc03060	SMc03060		SM_b21569		SMa1948		SM_b21569	SMa1948					SMa0319		SMc00256			SMa0319	SMc00256
SMc03061			SM_b21576		SMa1954		SM_b21576	SMa1954		cluster_48			SMa0347		SMc00275			SMa0347	SMc00275
SMc01321			SM_b21598		SMa1979		SM_b21598	SMa1979		SMc00654	SMc00654		SMa0355		SMc00278			SMa0355	SMc00278
SM_b20901	SM_b20901		SM_b21600		SMa1987		SM_b21600	SMa1987		SMa0193			SMa0372		SMc00329			SMa0372	SMc00329
SMc02147			SM_b21601		SMa2004		SM_b21601	SMa2004					SMa0407		SMc00429			SMa0407	SMc00429
SMa1442	SMa1442		SM_b21630		SMa2015		SM_b21630	SMa2015					SMa0462		SMc00458			SMa0462	SMc00458
SM_b20942			SM_b21641		SMa2027		SM_b21641	SMa2027					SMa0498		SMc00479			SMa0498	SMc00479
SMc02514			SM_b21650		SMa2049		SM_b21650	SMa2049					SMa0520		SMc00490			SMa0520	SMc00490
SMa2303	SMa2303		SM_b21706		SMa2107		SM_b21706	SMa2107		cluster_50			SMa0625		SMc00654			SMa0625	SMc00654
SMc02323	SMc02323		SMa0063		SMa2163		SMa0063	SMa2163		SM_b20276	SM_b20276		SMa0636		SMc00658			SMa0636	SMc00658
SMc02519			SMa0078		SMa2215		SMa0078	SMa2215		SMc04363			SMa0661		SMc00678			SMa0661	SMc00678
SMc04134	SMc04134		SMa0089		SMa2287		SMa0089	SMa2287					SMa0667		SMc00679			SMa0667	SMc00679
SM_b21346	SM_b21346		SMa0097		SMa2303		SMa0097	SMa2303					SMa0690		SMc00766			SMa0690	SMc00766
SMc03878			SMa0101		SMa2387		SMa0101	SMa2387					SMa0748		SMc00785			SMa0748	SMc00785
SM_b20712			SMa0114		SMa5007		SMa0114	SMa5007					SMa0750		SMc00794			SMa0750	SMc00794
SMc00163	SMc00163		SMa0179		SMa5030		SMa0179	SMa5030		cluster_56			SMa0751		SMc00820			SMa0751	SMc00820
SM_b20674	SM_b20674		SMa0190		SMc00058		SMa0190	SMc00058		SMc01406	SMc01406		SMa0753		SMc00831			SMa0753	SMc00831
SM_b20817	SM_b20817		SMa0222		SMc00098		SMa0222	SMc00098		SMa0814			SMa0771		SMc00877			SMa0771	SMc00877
SMc04093			SMa0246		SMc00107		SMa0246	SMc00107		SMa0822			SMa0772		SMc00878			SMa0772	SMc00878
SMa1927			SMa0247		SMc00109		SMa0247	SMc00109		SMa0825			SMa0773		SMc00879			SMa0773	SMc00879
SM_b21598	SM_b21598		SMa0281		SMc00146		SMa0281	SMc00146		SMc03210	SMc03210		SMa0789		SMc00929			SMa0789	SMc00929
SMc02172	SMc02172		SMa0303		SMc00163		SMa0303	SMc00163					SMa0810		SMc00953			SMa0810	SMc00953
SM_b20896	SM_b20896		SMa0307		SMc00182		SMa0307	SMc00182					SMa0814		SMc00994			SMa0814	SMc00994
SM_b21102	SM_b21102		SMa0319		SMc00241		SMa0319	SMc00241					SMa0815		SMc01092			SMa0815	SMc01092
SMc01531			SMa0347		SMc00256		SMa0347	SMc00256					SMa0822		SMc01168			SMa0822	SMc01168
			SMa0355		SMc00275		SMa0355	SMc00275		cluster_58			SMa0825		SMc01225			SMa0825	SMc01225
			SMa0372		SMc00283		SMa0372	SMc00283		SMc00277			SMa0829		SMc01226			SMa0829	SMc01226
			SMa0402		SMc00380		SMa0402	SMc00380		SMc00278	SMc00278		SMa0830		SMc01403			SMa0830	SMc01403
			SMa0498		SMc00458		SMa0498	SMc00458					SMa0831		SMc01406			SMa0831	SMc01406
cluster_36			SMa0520		SMc00479		SMa0520	SMc00479					SMa0838		SMc01495			SMa0838	SMc01495
SM_b20758	SM_b20758		SMa0557		SMc00490		SMa0557	SMc00490					SMa0846		SMc01563			SMa0846	SMc01563
SM_b20759			SMa0748		SMc00558		SMa0748	SMc00558					SMa0849		SMc01592			SMa0849	SMc01592
SMc02634			SMa0809		SMc00646		SMa0809	SMc00646		cluster_61			SMa0872		SMc01610			SMa0872	SMc01610
SMc03123	SMc03123		SMa0815		SMc00654		SMa0815	SMc00654		SMc01610	SMc01610		SMa0985		SMc01615			SMa0985	SMc01615
SMc01605			SMa0849		SMc00679		SMa0849	SMc00679		SMa1749	SMa1749		SMa1082		SMc01630			SMa1082	SMc01630
SMc02146			SMa0955		SMc00698		SMa0955	SMc00698		SMc01450			SMa1100		SMc01651			SMa1100	SMc01651
SMc00414			SMa1067		SMc00766		SMa1067	SMc00766		SMc04143	SMc04143		SMa1118		SMc01664			SMa1118	SMc01664
SM_b21177			SMa1207		SMc00780		SMa1207	SMc00780					SMa1132		SMc01728			SMa1132	SMc01728
SMc01127			SMa1299		SMc00785		SMa1299	SMc00785					SMa1134		SMc01762			SMa1134	SMc01762
SMc04143	SMc04143		SMa1387		SMc00794		SMa1387	SMc00794					SMa1136		SMc01819			SMa1136	SMc01819
			SMa1442		SMc00820		SMa1442	SMc00820					SMa1141		SMc01908			SMa1141	SMc01908
			SMa1454		SMc00829		SMa1454	SMc00829		cluster_68			SMa1147		SMc01945			SMa1147	SMc01945
			SMa1480		SMc00831		SMa1480	SMc00831		SMa0750	SMa0750		SMa1154		SMc01975			SMa1154	SMc01975
			SMa1587		SMc00877		SMa1587	SMc00877		SMc00256	SMc00256		SMa1169		SMc02030			SMa1169	SMc02030
cluster_39			SMa1602		SMc00878		SMa1602	SMc00878		SMa0751			SMa1201		SMc02140			SMa1201	SMc02140
SMc02503			SMa1698		SMc00879		SMa1698	SMc00879					SMa1207		SMc02172			SMa1207	SMc02172
SMc02504	SMc02504		SMa1705		SMc00929		SMa1705	SMc00929					SMa1211		SMc02175			SMa1211	SMc02175
			SMa1720		SMc00953		SMa1720	SMc00953					SMa1231		SMc02223			SMa1231	SMc02223
			SMa1726		SMc01092		SMa1726	SMc01092					SMa1299		SMc02261			SMa1299	SMc02261
			SMa1736		SMc01139		SMa1736	SMc01139		cluster_76			SMa1334		SMc02323			SMa1334	SMc02323
			SMa1749		SMc01168		SMa1749	SMc01168		SM_b21359	SM_b21359		SMa1339		SMc02340			SMa1339	SMc02340
cluster_42			SMa1893		SMc01223		SMa1893	SMc01223		SMa0232			SMa1387		SMc02366			SMa1387	SMc02366
SMc03879			SMa1927		SMc01225		SMa1927	SMc01225					SMa1442		SMc02470			SMa1442	SMc02470
SMc02140	SMc02140		SMa1948		SMc01260		SMa1948	SMc01260					SMa1454		SMc02523			SMa1454	SMc02523
SMc00362			SMa1954		SMc01269		SMa1954	SMc01269					SMa1456		SMc02560			SMa1456	SMc02560
SMc04024			SMa1979		SMc01330		SMa1979	SMc01330					SMa1480		SMc02584			SMa1480	SMc02584
SMc03050			SMa1987		SMc01403		SMa1987	SMc01403		cluster_85			SMa1505		SMc02647			SMa1505	SMc02647
SMc01208			SMa2004		SMc01406		SMa2004	SMc01406		SMa0815	SMa0815		SMa1632		SMc02851			SMa1632	SMc02851
SMc00034			SMa2015		SMc01495		SMa2015	SMc01495		SMa0814			SMa1688		SMc02888			SMa1688	SMc02888
SMc03961			SMa2027		SMc01504		SMa2027	SMc01504		SMa0822			SMa1749		SMc02893			SMa1749	SMc02893
SMc00781			SMa2049		SMc01563		SMa2049	SMc01563		SMa0825			SMa1797		SMc03015			SMa1797	SMc03015
SMc02058			SMa2107		SMc01570		SMa2107	SMc01570					SMa1893		SMc03046			SMa1893	SMc03046
SMc02059			SMa2163		SMc01592		SMa2163	SMc01592					SMa1910		SMc03060			SMa1910	SMc03060
SMc03027			SMa2215		SMc01593		SMa2215	SMc01593					SMa1918		SMc03092			SMa1918	SMc03092
			SMa2287		SMc01610		SMa2287	SMc01610					SMa1948		SMc03122			SMa1948	SMc03122
			SMa2303		SMc01615		SMa2303	SMc01615		cluster_87			SMa1954		SMc03123			SMa1954	SMc03123
			SMa2379		SMc01630		SMa2379	SMc01630		SM_b20347	SM_b20347		SMa1966		SMc03140			SMa1966	SMc03140
			SMa2387		SMc01651		SMa2387	SMc01651		SMc01195			SMa2008		SMc03169			SMa2008	SMc03169
cluster_46			SMa5007		SMc01664		SMa5007	SMc01664		SM_b20674	SM_b20674		SMa2009		SMc03170			SMa2009	SMc03170
SMa1299	SMa1299		SMa5030		SMc01762		SMa5030	SMc01762					SMa2015		SMc03210			SMa2015	SMc03210
SMc03830			SMc00009		SMc01768		SMc00009	SMc01768					SMa2049		SMc03258			SMa2049	SMc03258
			SMc00013		SMc01787		SMc00013	SMc01787					SMa2163		SMc03820			SMa2163	SMc03820
			SMc00017		SMc01819		SMc00017	SMc01819					SMa2167		SMc03843			SMa2167	SMc03843
			SMc00021		SMc01908		SMc00021	SMc01908		cluster_89			SMa2215		SMc03890			SMa2215	SMc03890
			SMc00023		SMc01945		SMc00023	SMc01945		SMc01630	SMc01630		SMa2263		SMc03998			SMa2263	SMc03998
cluster_51			SMc00033		SMc01974		SMc00033	SMc01974		SMc04408			SMa2303		SMc04011			SMa2303	SMc04011
SMc03170	SMc03170		SMc00034		SMc01975		SMc00034	SMc01975					SMa5007		SMc04032			SMa5007	SMc04032
SMc01700			SMc00036		SMc02022		SMc00036	SMc02022					SMa5030		SMc04051			SMa5030	SMc04051
			SMc00040		SMc02030		SMc00040	SMc02030					SMc00041		SMc04055			SMc00041	SMc04055
			SMc00058		SMc02140		SMc00058	SMc02140					SMc00080		SMc04109			SMc00080	SMc04109
			SMc00059		SMc02172		SMc00059	SMc02172		cluster_90			SMc00095		SMc04134			SMc00095	SMc04134
			SMc00067		SMc02175		SMc00067	SMc02175		SMa2008	SMa2008		SMc00107		SMc04143			SMc00107	SMc04143
cluster_59			SMc00070		SMc02184		SMc00070	SMc02184		SMa2009			SMc00109		SMc04162			SMc00109	SMc04162
SMa1948	SMa1948		SMc00088		SMc02223		SMc00088	SMc02223					SMc00116		SMc04163			SMc00116	SMc04163
SMc00492			SMc00098		SMc02235		SMc00098	SMc02235					SMc00118		SMc04203			SMc00118	SMc04203
SMc00109	SMc00109		SMc00100		SMc02323		SMc00100	SMc02323					SMc00146		SMc04264			SMc00146	SMc04264
			SMc00105		SMc02340		SMc00105	SMc02340					SMc00163		SMc04315			SMc00163	SMc04315
			SMc00107		SMc02366		SMc00107	SMc02366		cluster_97			SMc00241		SMc04348			SMc00241	SMc04348
			SMc00109		SMc02425		SMc00109	SMc02425		SMa0750	SMa0750		SMc00251		SMc04882			SMc00251	SMc04882
			SMc00120		SMc02429		SMc00120	SMc02429		SMa0751			SMc00256					SMc00256
cluster_61			SMc00140		SMc02470		SMc00140	SMc02470					SMc00270					SMc00270
SMc01762	SMc01762		SMc00146		SMc02504		SMc00146	SMc02504					SMc00275					SMc00275
SM_b20162	SM_b20162		SMc00148		SMc02523		SMc00148	SMc02523					SMc00277					SMc00277
SMc03893			SMc00149		SMc02560		SMc00149	SMc02560					SMc00278					SMc00278
SMc04252			SMc00150		SMc02584		SMc00150	SMc02584		cluster_98			SMc00280					SMc00280
SMc03065			SMc00155		SMc02596		SMc00155	SMc02596		SM_b21300			SMc00329					SMc00329
SMc02098			SMc00159		SMc02647		SMc00159	SMc02647		SM_b21299	SM_b21299		SMc00429					SMc00429
SM_b20894			SMc00163		SMc02777		SMc00163	SMc02777					SMc00458					SMc00458
SMc04291			SMc00174		SMc02844		SMc00174	SMc02844					SMc00479					SMc00479
SMc00914			SMc00176		SMc02851		SMc00176	SMc02851					SMc00490					SMc00490
SMc00641			SMc00182		SMc02866		SMc00182	SMc02866					SMc00529					SMc00529
SM_b20722	SM_b20722		SMc00191		SMc02888		SMc00191	SMc02888		cluster_102			SMc00654					SMc00654
SM_b20448			SMc00234		SMc02893		SMc00234	SMc02893		SMa0407			SMc00658					SMc00658
SM_b20509	SM_b20509		SMc00235		SMc02976		SMc00235	SMc02976		SMc02261	SMc02261		SMc00672					SMc00672
			SMc00241		SMc02984		SMc00241	SMc02984		SM_b20509	SM_b20509		SMc00678					SMc00678
			SMc00256		SMc03015		SMc00256	SMc03015		SM_b20508			SMc00679					SMc00679
			SMc00275		SMc03046		SMc00275	SMc03046					SMc00766					SMc00766
			SMc00283		SMc03060		SMc00283	SMc03060					SMc00785					SMc00785
cluster_67			SMc00289		SMc03122		SMc00289	SMc03122					SMc00794					SMc00794
SMc00040			SMc00293		SMc03123		SMc00293	SMc03123					SMc00800					SMc00800
SMc01945	SMc01945		SMc00294		SMc03140		SMc00294	SMc03140		cluster_110			SMc00820					SMc00820
SMc02425	SMc02425		SMc00300		SMc03150		SMc00300	SMc03150		SMc00678	SMc00678		SMc00828					SMc00828
SMc00098	SMc00098		SMc00327		SMc03165		SMc00327	SMc03165		SMc02351			SMc00831					SMc00831
			SMc00328		SMc03169		SMc00328	SMc03169					SMc00864					SMc00864
			SMc00333		SMc03170		SMc00333	SMc03170					SMc00877					SMc00877
			SMc00335		SMc03210		SMc00335	SMc03210					SMc00878					SMc00878
			SMc00362		SMc03258		SMc00362	SMc03258					SMc00879					SMc00879
cluster_73			SMc00363		SMc03816		SMc00363	SMc03816		cluster_113			SMc00886					SMc00886
SMc01406	SMc01406		SMc00365		SMc03820		SMc00365	SMc03820		SMc04163	SMc04163		SMc00929					SMc00929
SMc03210	SMc03210		SMc00375		SMc03843		SMc00375	SMc03843		SMc02323	SMc02323		SMc00938					SMc00938
SMc00947			SMc00380		SMc03873		SMc00380	SMc03873		SMa1505	SMa1505		SMc00941					SMc00941
			SMc00394		SMc03890		SMc00394	SMc03890		SMc00095	SMc00095		SMc00942					SMc00942
			SMc00409		SMc03998		SMc00409	SMc03998					SMc00949					SMc00949
			SMc00410		SMc04011		SMc00410	SMc04011					SMc00953					SMc00953
			SMc00414		SMc04032		SMc00414	SMc04032					SMc00994					SMc00994
cluster_74			SMc00415		SMc04055		SMc00415	SMc04055					SMc01004					SMc01004
SMa1207	SMa1207		SMc00427		SMc04109		SMc00427	SMc04109		cluster_114			SMc01092					SMc01092
SMc03104			SMc00432		SMc04134		SMc00432	SMc04134		SM_b20509	SM_b20509		SMc01106					SMc01106
SM_b20426	SM_b20426		SMc00433		SMc04143		SMc00433	SMc04143		SM_b20508			SMc01118					SMc01118
SMc00300			SMc00458		SMc04162		SMc00458	SMc04162					SMc01140					SMc01140
			SMc00461		SMc04163		SMc00461	SMc04163					SMc01168					SMc01168
			SMc00475		SMc04169		SMc00475	SMc04169					SMc01182					SMc01182
			SMc00479		SMc04203		SMc00479	SMc04203					SMc01184					SMc01184
			SMc00485		SMc04220		SMc00485	SMc04220		cluster_117			SMc01195					SMc01195
cluster_76			SMc00488		SMc04260		SMc00488	SMc04260		SMa0625			SMc01199					SMc01199
SMc00679	SMc00679		SMc00489		SMc04264		SMc00489	SMc04264		SMc03092	SMc03092		SMc01225					SMc01225
SM_b21186			SMc00490		SMc04315		SMc00490	SMc04315					SMc01226					SMc01226
SM_b21187	SM_b21187		SMc00492		SMc04348		SMc00492	SMc04348					SMc01228					SMc01228
			SMc00493		SMc04882		SMc00493	SMc04882					SMc01229					SMc01229
			SMc00494				SMc00494						SMc01260					SMc01260
			SMc00505				SMc00505			cluster_119			SMc01267					SMc01267
			SMc00508				SMc00508			SMc02851	SMc02851		SMc01403					SMc01403
cluster_84			SMc00528				SMc00528			SM_b20531	SM_b20531		SMc01406					SMc01406
SMc01610	SMc01610		SMc00548				SMc00548			SMc02589			SMc01443					SMc01443
SMc00149			SMc00551				SMc00551			SMc03123	SMc03123		SMc01450					SMc01450
SMa1749	SMa1749		SMc00554				SMc00554			SMc01724			SMc01456					SMc01456
SMc03891			SMc00555				SMc00555						SMc01488					SMc01488
SMc03890	SMc03890		SMc00558				SMc00558						SMc01495					SMc01495
			SMc00570				SMc00570						SMc01497					SMc01497
			SMc00571				SMc00571						SMc01551					SMc01551
			SMc00572				SMc00572			cluster_122			SMc01554					SMc01554
			SMc00573				SMc00573			SMa0063	SMa0063		SMc01563					SMc01563
cluster_85			SMc00575				SMc00575			SMa1134			SMc01592					SMc01592
SMc00140			SMc00576				SMc00576			SM_b20106	SM_b20106		SMc01610					SMc01610
SMc01563	SMc01563		SMc00581				SMc00581						SMc01615					SMc01615
SMc04115			SMc00590				SMc00590						SMc01630					SMc01630
SMc01768	SMc01768		SMc00593				SMc00593						SMc01651					SMc01651
SMc02274			SMc00594				SMc00594						SMc01664					SMc01664
SMc00638			SMc00604				SMc00604			cluster_125			SMc01724					SMc01724
SMc00888			SMc00608				SMc00608			SMc01989			SMc01728					SMc01728
SMc00120			SMc00609				SMc00609			SMc00107	SMc00107		SMc01748					SMc01748
SMc00975			SMc00610				SMc00610						SMc01762					SMc01762
SMc02463			SMc00618				SMc00618						SMc01819					SMc01819
SMc03046	SMc03046		SMc00620				SMc00620						SMc01908					SMc01908
SMc03039			SMc00638				SMc00638						SMc01945					SMc01945
SMc00651			SMc00641				SMc00641			cluster_130			SMc01975					SMc01975
SMc00652			SMc00643				SMc00643			SMc02560	SMc02560		SMc01981					SMc01981
			SMc00646				SMc00646			SMc00785	SMc00785		SMc01982					SMc01982
			SMc00651				SMc00651						SMc01989					SMc01989
			SMc00652				SMc00652						SMc01995					SMc01995
			SMc00654				SMc00654						SMc02030					SMc02030
cluster_96			SMc00655				SMc00655						SMc02087					SMc02087
SMc03879			SMc00679				SMc00679			cluster_131			SMc02113					SMc02113
SMc02118			SMc00683				SMc00683			SM_b20231			SMc02140					SMc02140
SM_b21115	SM_b21115		SMc00690				SMc00690			SM_b20484			SMc02162					SMc02162
SMc02396			SMc00698				SMc00698			SMa5030	SMa5030		SMc02172					SMc02172
SM_b21187	SM_b21187		SMc00703				SMc00703			SM_b20820			SMc02175					SMc02175
SM_b20455	SM_b20455		SMc00704				SMc00704			SMc03060	SMc03060		SMc02223					SMc02223
SM_b21186			SMc00720				SMc00720			SM_b20665			SMc02229					SMc02229
SM_b20456			SMc00737				SMc00737			SM_b20901	SM_b20901		SMc02261					SMc02261
SMc04143	SMc04143		SMc00762				SMc00762			SM_b20896	SM_b20896		SMc02323					SMc02323
SMc00947			SMc00766				SMc00766			SMc02140	SMc02140		SMc02340					SMc02340
			SMc00780				SMc00780			SM_b21640			SMc02350					SMc02350
			SMc00781				SMc00781			SM_b21647			SMc02351					SMc02351
			SMc00785				SMc00785			SMa1442	SMa1442		SMc02366					SMc02366
			SMc00786				SMc00786			SMc02773			SMc02374					SMc02374
cluster_99			SMc00791				SMc00791			SMa2303	SMa2303		SMc02391					SMc02391
SMc01165			SMc00794				SMc00794			SMc02323	SMc02323		SMc02406					SMc02406
SMc02172	SMc02172		SMc00813				SMc00813			SMc04134	SMc04134		SMc02470					SMc02470
SMa0307	SMa0307		SMc00820				SMc00820			SM_b21346	SM_b21346		SMc02523					SMc02523
			SMc00821				SMc00821			SMc00163	SMc00163		SMc02524					SMc02524
			SMc00825				SMc00825			SM_b21295			SMc02560					SMc02560
			SMc00829				SMc00829			SM_b20033	SM_b20033		SMc02584					SMc02584
			SMc00830				SMc00830			SM_b20674	SM_b20674		SMc02589					SMc02589
cluster_102			SMc00831				SMc00831			SMc00270			SMc02642					SMc02642
SMc04226			SMc00860				SMc00860			SMa1339			SMc02647					SMc02647
SMc02568			SMc00872				SMc00872			SM_b20817	SM_b20817		SMc02773					SMc02773
SM_b20942			SMc00877				SMc00877			SM_b20818			SMc02778					SMc02778
SMc00300			SMc00878				SMc00878			SM_b20049			SMc02851					SMc02851
SMc03941			SMc00879				SMc00879			SM_b21598	SM_b21598		SMc02888					SMc02888
SMc04264	SMc04264		SMc00888				SMc00888			SMc02172	SMc02172		SMc02893					SMc02893
SMc04169	SMc04169		SMc00896				SMc00896			SMc02778			SMc02980					SMc02980
SMc04331			SMc00914				SMc00914			SM_b20522			SMc03015					SMc03015
SMc00983			SMc00916				SMc00916			SMc02642			SMc03046					SMc03046
			SMc00925				SMc00925			SM_b20722	SM_b20722		SMc03060					SMc03060
			SMc00929				SMc00929			SM_b21102	SM_b21102		SMc03092					SMc03092
			SMc00943				SMc00943			SM_b20509	SM_b20509		SMc03101					SMc03101
			SMc00944				SMc00944						SMc03122					SMc03122
cluster_103			SMc00947				SMc00947						SMc03123					SMc03123
SMc00655			SMc00948				SMc00948						SMc03140					SMc03140
SM_b21650	SM_b21650		SMc00953				SMc00953						SMc03169					SMc03169
SMc03038			SMc00964				SMc00964			cluster_140			SMc03170					SMc03170
SMc00528			SMc00975				SMc00975			SMa1948	SMa1948		SMc03210					SMc03210
SMc03832			SMc00978				SMc00978			SMa0222	SMa0222		SMc03251					SMc03251
			SMc00983				SMc00983			SMa0667			SMc03252					SMc03252
			SMc00987				SMc00987			SMc04348	SMc04348		SMc03253					SMc03253
			SMc00990				SMc00990						SMc03256					SMc03256
			SMc01010				SMc01010						SMc03258					SMc03258
cluster_104			SMc01018				SMc01018						SMc03287					SMc03287
SMc01768	SMc01768		SMc01025				SMc01025						SMc03744					SMc03744
SMc00896			SMc01052				SMc01052			cluster_144			SMc03780					SMc03780
SMc04115			SMc01092				SMc01092			SM_b20521			SMc03781					SMc03781
SMc00638			SMc01104				SMc01104			SMc00929	SMc00929		SMc03794					SMc03794
SMc00987			SMc01108				SMc01108			SMc00886			SMc03820					SMc03820
			SMc01120				SMc01120			SM_b20375	SM_b20375		SMc03843					SMc03843
			SMc01121				SMc01121						SMc03890					SMc03890
			SMc01127				SMc01127						SMc03998					SMc03998
			SMc01136				SMc01136						SMc04011					SMc04011
cluster_105			SMc01139				SMc01139						SMc04032					SMc04032
SMc02636			SMc01152				SMc01152			cluster_148			SMc04051					SMc04051
SMc00703			SMc01163				SMc01163			SM_b20047			SMc04054					SMc04054
SMc04461			SMc01164				SMc01164			SMc02980			SMc04055					SMc04055
SM_b21180	SM_b21180		SMc01165				SMc01165			SMc01495	SMc01495		SMc04109					SMc04109
SMc02686			SMc01167				SMc01167			SM_b20674	SM_b20674		SMc04134					SMc04134
SMc03859			SMc01168				SMc01168			SMc00879	SMc00879		SMc04143					SMc04143
			SMc01169				SMc01169			SMc02470	SMc02470		SMc04161					SMc04161
			SMc01187				SMc01187			SMa0062	SMa0062		SMc04162					SMc04162
			SMc01200				SMc01200						SMc04163					SMc04163
			SMc01202				SMc01202						SMc04194					SMc04194
cluster_108			SMc01208				SMc01208						SMc04203					SMc04203
SMc00879	SMc00879		SMc01209				SMc01209						SMc04239					SMc04239
SM_b20712			SMc01215				SMc01215			cluster_150			SMc04264					SMc04264
			SMc01223				SMc01223			SMa0097	SMa0097		SMc04313					SMc04313
			SMc01225				SMc01225			SMc02374			SMc04315					SMc04315
			SMc01231				SMc01231						SMc04319					SMc04319
			SMc01235				SMc01235						SMc04320					SMc04320
cluster_109			SMc01260				SMc01260						SMc04337					SMc04337
SM_b20455	SM_b20455		SMc01269				SMc01269						SMc04348					SMc04348
SM_b20456			SMc01275				SMc01275			cluster_153			SMc04363					SMc04363
			SMc01283				SMc01283			SM_b20425	SM_b20425		SMc04408					SMc04408
			SMc01285				SMc01285			SM_b20426	SM_b20426		SMc04882					SMc04882
			SMc01287				SMc01287			SMc00490	SMc00490
			SMc01289				SMc01289
cluster_112			SMc01292				SMc01292
SMc00780	SMc00780		SMc01294				SMc01294
SMc00781			SMc01296				SMc01296
			SMc01299				SMc01299			cluster_156
			SMc01306				SMc01306			SMa0846
			SMc01309				SMc01309			SM_b20586	SM_b20586
			SMc01310				SMc01310
cluster_114			SMc01316				SMc01316
SMc01104			SMc01318				SMc01318
SMa2004	SMa2004		SMc01321				SMc01321
SMc02093			SMc01323				SMc01323			cluster_159
			SMc01327				SMc01327			SMc02350
			SMc01330				SMc01330			SM_b21650	SM_b21650
			SMc01331				SMc01331
			SMc01333				SMc01333
cluster_119			SMc01336				SMc01336
SMc00780	SMc00780		SMc01347				SMc01347
SMc00781			SMc01350				SMc01350			cluster_160
			SMc01354				SMc01354			SM_b20055	SM_b20055
			SMc01357				SMc01357			SM_b21647
			SMc01364				SMc01364			SMc04055	SMc04055
			SMc01403				SMc01403
cluster_123			SMc01406				SMc01406
SMc03816	SMc03816		SMc01428				SMc01428
SMa0372	SMa0372		SMc01431				SMc01431
SMc02581			SMc01495				SMc01495			cluster_169
SMc02984	SMc02984		SMc01504				SMc01504			SM_b21117	SM_b21117
			SMc01524				SMc01524			SMc03015	SMc03015
			SMc01531				SMc01531			SMa0838
			SMc01534				SMc01534			SMc04882	SMc04882
			SMc01535				SMc01535			SMc01267
cluster_125			SMc01556				SMc01556			SMc03046	SMc03046
SMc02560	SMc02560		SMc01563				SMc01563			SMc00654	SMc00654
SMc00098	SMc00098		SMc01569				SMc01569			SMc00828
SMc01787	SMc01787		SMc01570				SMc01570
SMc00975			SMc01578				SMc01578
SMc01318			SMc01579				SMc01579
SMc00040			SMc01585				SMc01585
			SMc01588				SMc01588			cluster_171
			SMc01592				SMc01592			SMc03122	SMc03122
			SMc01593				SMc01593			SMc00146	SMc00146
			SMc01605				SMc01605			SMc00529
cluster_126			SMc01606				SMc01606			SMc00785	SMc00785
SMc03122	SMc03122		SMc01610				SMc01610			SMc01092	SMc01092
SMc00146	SMc00146		SMc01615				SMc01615			SM_b21169	SM_b21169
SMc00554			SMc01630				SMc01630
SMc01092	SMc01092		SMc01651				SMc01651
SMc00943			SMc01664				SMc01664
SMc00944			SMc01700				SMc01700
			SMc01719				SMc01719			cluster_172
			SMc01723				SMc01723			SM_b20673
			SMc01726				SMc01726			SM_b20674	SM_b20674
			SMc01731				SMc01731
cluster_127			SMc01732				SMc01732
SMc02503			SMc01756				SMc01756
SM_b20347	SM_b20347		SMc01762				SMc01762
SMc02504	SMc02504		SMc01765				SMc01765			cluster_178
			SMc01768				SMc01768			SMc02087
			SMc01769				SMc01769			SMc03998	SMc03998
			SMc01777				SMc01777			SM_b21115	SM_b21115
			SMc01781				SMc01781			SMc02374
cluster_130			SMc01782				SMc01782			SMc03060	SMc03060
SM_b21270	SM_b21270		SMc01787				SMc01787
SMc01606			SMc01801				SMc01801
SMc00458	SMc00458		SMc01819				SMc01819
			SMc01834				SMc01834
			SMc01845				SMc01845			cluster_179
			SMc01852				SMc01852			SMa1456
			SMc01871				SMc01871			SM_b20896	SM_b20896
cluster_131			SMc01875				SMc01875
SM_b20899			SMc01876				SMc01876
SM_b20712			SMc01882				SMc01882
SMc01165			SMc01885				SMc01885
SMc01164			SMc01903				SMc01903			cluster_180
SMc01163			SMc01904				SMc01904			SMc03140	SMc03140
SM_b20072			SMc01908				SMc01908			SMc03744
SM_b20154	SM_b20154		SMc01909				SMc01909			SMc02223	SMc02223
			SMc01911				SMc01911			SMc00938
			SMc01914				SMc01914			SMc01975	SMc01975
			SMc01918				SMc01918			SMc00529
			SMc01935				SMc01935
cluster_134			SMc01945				SMc01945
SMc01136			SMc01974				SMc01974
SMc01108			SMc01975				SMc01975
SMc04012			SMc02022				SMc02022			cluster_181
SMc03809			SMc02030				SMc02030			SMc01762	SMc01762
SMc02145			SMc02053				SMc02053			SMa0246	SMa0246
SMc00275	SMc00275		SMc02057				SMc02057			SM_b20162	SM_b20162
SM_b21359	SM_b21359		SMc02058				SMc02058			SM_b20509	SM_b20509
SMc00335			SMc02059				SMc02059			SM_b20522
SMc00896			SMc02062				SMc02062
SMc00551			SMc02063				SMc02063
SMc01120			SMc02073				SMc02073
SMc02083			SMc02083				SMc02083
SMc01225	SMc01225		SMc02093				SMc02093			cluster_183
SMc00427			SMc02094				SMc02094			SMa1141
SMc00174			SMc02097				SMc02097			SM_b21640
SMc01336			SMc02098				SMc02098			SM_b21300
			SMc02101				SMc02101			SM_b20219	SM_b20219
			SMc02103				SMc02103			SM_b20531	SM_b20531
			SMc02117				SMc02117			SMc04134	SMc04134
			SMc02118				SMc02118
cluster_135			SMc02119				SMc02119
SMc01630	SMc01630		SMc02140				SMc02140
SMc01306			SMc02141				SMc02141
			SMc02145				SMc02145			cluster_184
			SMc02146				SMc02146			SM_b21295
			SMc02147				SMc02147			SMc01908	SMc01908
			SMc02160				SMc02160			SMc01106
cluster_137			SMc02163				SMc02163
SMc02781			SMc02166				SMc02166
SM_b20758	SM_b20758		SMc02170				SMc02170
SM_b20759			SMc02172				SMc02172
SMc02782			SMc02174				SMc02174			cluster_185
SMc03846			SMc02175				SMc02175			SMa1387	SMa1387
			SMc02181				SMc02181			SMc03251
			SMc02184				SMc02184			SMc00275	SMc00275
			SMc02223				SMc02223			SM_b21359	SM_b21359
			SMc02235				SMc02235			SM_b20843
cluster_139			SMc02240				SMc02240			SM_b20465
SMc03004			SMc02242				SMc02242			SM_b20255
SMc04024			SMc02246				SMc02246			SMc04337
SMc02942			SMc02264				SMc02264			SMc01225	SMc01225
SM_b21479			SMc02274				SMc02274			SMc03101
SMc01781			SMc02296				SMc02296			SM_b20340
SMc03046	SMc03046		SMc02305				SMc02305
SMc00059			SMc02306				SMc02306
SMc00191			SMc02307				SMc02307
SMc00987			SMc02323				SMc02323
SMc01579			SMc02340				SMc02340			cluster_190
SMc03039			SMc02366				SMc02366			SMc01199
SMc03038			SMc02378				SMc02378			SM_b20582	SM_b20582
SMc03037			SMc02392				SMc02392			SMc02584	SMc02584
SMc02463			SMc02396				SMc02396			SM_b20331
SMc04112			SMc02404				SMc02404
SMc04010			SMc02408				SMc02408
SMc00604			SMc02425				SMc02425
SMc00720			SMc02429				SMc02429
SMc00638			SMc02438				SMc02438			cluster_191
SMc00548			SMc02447				SMc02447			SMa0814
SMc03832			SMc02451				SMc02451			SMa0822
SMc02392			SMc02463				SMc02463			SM_b21210	SM_b21210
SMc00021			SMc02470				SMc02470			SMc04054
SMc00654	SMc00654		SMc02479				SMc02479
SM_b21514			SMc02483				SMc02483
			SMc02484				SMc02484
			SMc02487				SMc02487
			SMc02495				SMc02495			cluster_196
			SMc02498				SMc02498			SMa1893	SMa1893
cluster_147			SMc02503				SMc02503			SMc03781
SMc00654	SMc00654		SMc02504				SMc02504			SMa0123
SMc00655			SMc02514				SMc02514			SMc00877	SMc00877
			SMc02519				SMc02519
			SMc02520				SMc02520
			SMc02523				SMc02523
			SMc02543				SMc02543
cluster_148			SMc02560				SMc02560			cluster_199
SMa0097	SMa0097		SMc02562				SMc02562			SMc00251
SMc01834			SMc02568				SMc02568			SMc00994	SMc00994
SMc01885			SMc02581				SMc02581
			SMc02584				SMc02584
			SMc02596				SMc02596
			SMc02603				SMc02603
			SMc02634				SMc02634			cluster_201
cluster_151			SMc02636				SMc02636			SMc00458	SMc00458
SMc00492			SMc02647				SMc02647			SM_b21683
SM_b21359	SM_b21359		SMc02678				SMc02678			SM_b21400
			SMc02681				SMc02681
			SMc02686				SMc02686
			SMc02695				SMc02695
			SMc02717				SMc02717
cluster_153			SMc02725				SMc02725			cluster_205
SMc01136			SMc02737				SMc02737			SMc03210	SMc03210
SMc00140			SMc02753				SMc02753			SMa0229
SMc00107	SMc00107		SMc02764				SMc02764			SMc02980
SMc01294			SMc02777				SMc02777
			SMc02779				SMc02779
			SMc02781				SMc02781
			SMc02782				SMc02782
			SMc02796				SMc02796			cluster_206
cluster_159			SMc02818				SMc02818			SMc04161
SMc00698	SMc00698		SMc02838				SMc02838			SMc04134	SMc04134
SM_b21317			SMc02844				SMc02844
SMa1726	SMa1726		SMc02846				SMc02846
			SMc02851				SMc02851
			SMc02866				SMc02866
			SMc02884				SMc02884			cluster_207
			SMc02888				SMc02888			SM_b20665
cluster_161			SMc02893				SMc02893			SMc01497
SMc02777	SMc02777		SMc02896				SMc02896			SMa1339
SMc02408			SMc02897				SMc02897			SMc02523	SMc02523
SM_b20387	SM_b20387		SMc02910				SMc02910
			SMc02911				SMc02911
			SMc02941				SMc02941
			SMc02942				SMc02942
			SMc02976				SMc02976			cluster_215
cluster_162			SMc02984				SMc02984			SMc04320
SM_b21494			SMc03004				SMc03004			SM_b21493	SM_b21493
SM_b21493	SM_b21493		SMc03005				SMc03005			SMc01403	SMc01403
			SMc03013				SMc03013
			SMc03015				SMc03015
			SMc03027				SMc03027
			SMc03037				SMc03037
cluster_165			SMc03038				SMc03038			cluster_218
SMc00830			SMc03039				SMc03039			SMc04315	SMc04315
SMc01819	SMc01819		SMc03046				SMc03046			SMc03780
SMc00829	SMc00829		SMc03050				SMc03050			SMc04239
SMa1726	SMa1726		SMc03060				SMc03060
			SMc03061				SMc03061
			SMc03062				SMc03062
			SMc03065				SMc03065
			SMc03066				SMc03066			cluster_221
cluster_173			SMc03104				SMc03104			SMa0789	SMa0789
SMc02438			SMc03122				SMc03122			SMa0753
SMc01769			SMc03123				SMc03123
SMc02160			SMc03124				SMc03124
SMc00293			SMc03131				SMc03131
SMc00555			SMc03140				SMc03140
SMc00551			SMc03150				SMc03150			cluster_225
SMc00479	SMc00479		SMc03151				SMc03151			SMc01664	SMc01664
			SMc03157				SMc03157			SMa1169
			SMc03165				SMc03165			SMc00163	SMc00163
			SMc03169				SMc03169			SMa1154
			SMc03170				SMc03170			SMc03170	SMc03170
cluster_177			SMc03171				SMc03171			SM_b20683	SM_b20683
SMc01882			SMc03172				SMc03172			SMa0815	SMa0815
SMc04315	SMc04315		SMc03178				SMc03178			SMc02524
SMc04163	SMc04163		SMc03210				SMc03210			SMc00820	SMc00820
			SMc03258				SMc03258			SMa2263
			SMc03770				SMc03770			SMa2303	SMa2303
			SMc03772				SMc03772
			SMc03775				SMc03775
cluster_178			SMc03801				SMc03801
SMc00040			SMc03809				SMc03809
SMc00098	SMc00098		SMc03816				SMc03816			cluster_227
SMc03923			SMc03820				SMc03820			SMc01615	SMc01615
			SMc03829				SMc03829			SM_b21300
			SMc03830				SMc03830
			SMc03832				SMc03832
			SMc03843				SMc03843
cluster_179			SMc03846				SMc03846
SM_b21346	SM_b21346		SMc03857				SMc03857			cluster_232
SMc03171			SMc03859				SMc03859			SM_b21641	SM_b21641
SMa1979	SMa1979		SMc03862				SMc03862			SM_b20515
			SMc03873				SMc03873			SMc01004
			SMc03874				SMc03874			SM_b21521
			SMc03878				SMc03878
			SMc03879				SMc03879
cluster_185			SMc03881				SMc03881
SM_b20859	SM_b20859		SMc03884				SMc03884
SMc00155			SMc03890				SMc03890			cluster_235
SMa0063	SMa0063		SMc03891				SMc03891			SMa0748	SMa0748
			SMc03893				SMc03893			SMc01615	SMc01615
			SMc03899				SMc03899			SM_b21640
			SMc03923				SMc03923			SM_b20455	SM_b20455
			SMc03927				SMc03927			SMc04143	SMc04143
cluster_187			SMc03941				SMc03941
SMc03066			SMc03961				SMc03961
SMc00159			SMc03967				SMc03967
SMc04012			SMc03978				SMc03978
SMc04011	SMc04011		SMc03998				SMc03998			cluster_236
			SMc04000				SMc04000			SMa0065	SMa0065
			SMc04010				SMc04010			SMc02406
			SMc04011				SMc04011
			SMc04012				SMc04012
cluster_190			SMc04018				SMc04018
SM_b20758	SM_b20758		SMc04024				SMc04024
SM_b20759			SMc04032				SMc04032			cluster_238
			SMc04055				SMc04055			SM_b21372	SM_b21372
			SMc04093				SMc04093			SMc01981
			SMc04109				SMc04109			SMc04054
			SMc04112				SMc04112
cluster_193			SMc04115				SMc04115
SMc03140	SMc03140		SMc04134				SMc04134
SMc02725			SMc04143				SMc04143
SMc00571			SMc04162				SMc04162			cluster_241
SMc02681			SMc04163				SMc04163			SM_b20331
SMc01364			SMc04169				SMc04169			SMc03744
SMc02470	SMc02470		SMc04175				SMc04175			SM_b20366	SM_b20366
SMc01975	SMc01975		SMc04198				SMc04198			SM_b20457	SM_b20457
SMc03879			SMc04203				SMc04203
SMc00581			SMc04220				SMc04220
SMc02223	SMc02223		SMc04226				SMc04226
SMc03172			SMc04230				SMc04230
SMc01010			SMc04251				SMc04251			cluster_242
SMc00704			SMc04252				SMc04252			SMc00929	SMc00929
SMc00508			SMc04260				SMc04260			SMc01456
SMc03857			SMc04264				SMc04264
SMc00528			SMc04273				SMc04273
SMc02695			SMc04277				SMc04277
SMc00505			SMc04286				SMc04286
SM_b20899			SMc04291				SMc04291			cluster_243
SMc02118			SMc04296				SMc04296			SMc01406	SMc01406
SMc02117			SMc04305				SMc04305			SMc01488
SMc00872			SMc04315				SMc04315
			SMc04323				SMc04323
			SMc04331				SMc04331
			SMc04348				SMc04348
			SMc04383				SMc04383			cluster_246
cluster_194			SMc04385				SMc04385			SMc03256
SMc02560	SMc02560		SMc04405				SMc04405			SM_b20859	SM_b20859
SMc01726			SMc04410				SMc04410			SM_b20582	SM_b20582
SMc02562			SMc04411				SMc04411
SMc02764			SMc04449				SMc04449
SMc00655			SMc04458				SMc04458
			SMc04461				SMc04461
			SMc04882				SMc04882			cluster_249
										SMc02647	SMc02647
										SMc02113
cluster_196										SMc01488
SMc03873	SMc03873
SMc01504	SMc01504
SMc01431
SMc04018
										cluster_252
										SM_b20521
										SMc01819	SMc01819
										SM_b20465
cluster_201										SMa0849	SMa0849
SM_b21569	SM_b21569
SMc01104
										cluster_254
										SMc01610	SMc01610
cluster_202										SMc04363
SM_b20899										SMc02778
SMa0347	SMa0347									SMc04239
SMc01165
SMc01164
SMc01163
SM_b20154	SM_b20154
										cluster_256
										SM_b21464	SM_b21464
										SMc03253
cluster_218
SM_b20337	SM_b20337
SMa0089
SMc02520										cluster_257
SMc02844	SMc02844									SM_b21102	SM_b21102
										SMc00118
cluster_225
SMa1387	SMa1387									cluster_260
SMa5030	SMa5030									SM_b20441	SM_b20441
SMa1480	SMa1480									SMc04194
SM_b20824										SMa1456
SMa1749	SMa1749									SMc00080
SMc00825										SMa0636
SMc02053
SM_b20366	SM_b20366
SMa0307	SMa0307
SMc03157
SMc02498										cluster_263
										SMa1910
										SMc00241	SMc00241
										SMc01225	SMc01225
										SM_b20255
cluster_227										SMc00118
SMc00643
SM_b20123	SM_b20123
										cluster_265
										SMc00672
cluster_232										SMa2303	SMa2303
SM_b21117	SM_b21117									SM_b21291	SM_b21291
SMc00737
SMc03015	SMc03015
SMc01801
SMc01018
SMc00289										cluster_266
SMc01025										SMc04319
SM_b21479										SMa2015	SMa2015
SMc03046	SMc03046									SMa1918
SMc00489
SMc01209
SMc01871
SMc02678
SMc04296										cluster_267
SMc00654	SMc00654									SMa0838
SMc02782										SMa1954	SMa1954
SMc00009
SMc01903
										cluster_268
										SMc04320
cluster_233										SM_b20457	SM_b20457
SMc03169	SMc03169
SMc02117
SMa1454	SMa1454
SMc01777
										cluster_272
										SMa0498	SMa0498
										SM_b20203	SM_b20203
cluster_235
SMc01347
SMc01403	SMc01403
										cluster_274
										SM_b20392	SM_b20392
										SMa1893	SMa1893
										SMc00878	SMc00878
cluster_238										SM_b21442
SMa1720	SMa1720									SMa1910
SM_b20586	SM_b20586
SM_b20808
										cluster_275
										SMc03169	SMc03169
cluster_239										SMa1454	SMa1454
SMc01139	SMc01139									SMc00280
SM_b20441	SM_b20441
SMc00990
										cluster_276
										SM_b21346	SM_b21346
cluster_240										SMc02113
SMc02058										SMa0822
SM_b20773	SM_b20773									SMa1454	SMa1454
SM_b20262										SMa1749	SMa1749
cluster_241										cluster_277
SMc03124										SMc00953	SMc00953
SMc00067										SMa0661
SM_b20219	SM_b20219
SM_b20531	SM_b20531
SM_b21177
SMc01127
SMc01904										cluster_278
										SMa2163	SMa2163
										SMc03998	SMc03998
										SMa0810
										SM_b21533	SM_b21533
cluster_242
SMc00333
SMc01845
SMc01495	SMc01495
										cluster_279
										SMc00672
										SMa0229
										SMc00479	SMc00479
cluster_244										SMa2049	SMa2049
SMa0748	SMa0748
SMc01431
SMc03874
SMc00149
SMc01615	SMc01615									cluster_280
SMa1987	SMa1987									SMc01724
										SM_b20869	SM_b20869
cluster_248
SMa0281	SMa0281									cluster_282
SMc01914										SMc00878	SMc00878
										SMa0830
cluster_249
SMa1698										cluster_283
SMc01292										SM_b21295
SMc03809										SM_b20592	SM_b20592
SMc03772										SMc01728	SMc01728
SMc01318
SMc00821
SMc00820	SMc00820
SMc01316
SMc01911										cluster_285
										SMc02175	SMc02175
										SM_b20615
cluster_251
SMc00554
SMc03775										cluster_294
SMc00241	SMc00241									SM_b21579	SM_b21579
SMc04411										SMa0829
SMc01535
										cluster_295
cluster_256										SMc04882	SMc04882
SMc02240										SMa1147
SMc00256	SMc00256
SMa0303	SMa0303
SMc01592	SMc01592
SMc02896
SM_b21208	SM_b21208									cluster_296
SMc04323										SMa0246	SMa0246
										SMa1231
										SMa2049	SMa2049
										SM_b21021	SM_b21021
										SMa1147
cluster_258
SMc01169
SMc01168	SMc01168
										cluster_297
										SMc01226	SMc01226
										SMc00941
cluster_260										SMa1688	SMa1688
SMa0520	SMa0520									SMc04264	SMc04264
SMa0372	SMa0372									SM_b20647
SMa1454	SMa1454
SMc02514
										cluster_300
										SMc01748
cluster_261										SM_b21641	SM_b21641
SMc04383										SMc01450
SMc03050
SMc04882	SMc04882
SMc02779
SM_b21181
										cluster_304
										SM_b21641	SM_b21641
										SM_b20843
cluster_262
SMc01903
SMc00380	SMc00380
SMc00182	SMc00182									cluster_306
										SMc00490	SMc00490
										SMc01140
cluster_263
SMc03893
SMc04252										cluster_307
SMc01588										SM_b21294
SM_b21009										SMc04109	SMc04109
SMc02163										SMc00458	SMc00458
SMc00432										SM_b21333
SMc00433										SMc03101
SMc02523	SMc02523
										cluster_308
cluster_266										SMc00878	SMc00878
SM_b20211	SM_b20211									SMc01443
SMc02487										SMa1454	SMa1454
SMc02781										SMc01184
SM_b20203	SM_b20203
SMc01168	SMc01168
SMc01310
										cluster_309
										SMc02647	SMc02647
										SMa1456
cluster_268
SMc01756
SM_b21641	SM_b21641
SMc01935
SM_b20859	SM_b20859									cluster_314
SMc01569										SMc04319
SM_b20582	SM_b20582									SM_b21079	SM_b21079
SMc02484
SMc01323
SMc03770
SMc01719
SM_b20264										cluster_315
										SMc00429	SMc00429
										SMa1147
cluster_269
SMc02851	SMc02851
SM_b20531	SM_b20531									cluster_318
SMc00813										SM_b21158	SM_b21158
										SMa0985	SMa0985
cluster_272
SMc01578										cluster_319
SMc01585										SMc00938
SMc00794	SMc00794									SMc02888	SMc02888
SMc01524
SMc02884
SMc00033
										cluster_320
										SMc01982
										SMa0347	SMa0347
cluster_274										SM_b20154	SM_b20154
SMc00690
SMc02119
SMc00415
SMc00155
SMc02866	SMc02866									cluster_321
										SM_b21345
										SM_b20367	SM_b20367
										SMa1299	SMa1299
cluster_277
SMc03046	SMc03046
SMc00058	SMc00058
										cluster_322
										SMc01118
										SMc02350
										SM_b20859	SM_b20859
cluster_278
SM_b21080	SM_b21080
SMa0748	SMa0748
SMc03150	SMc03150
SMa1705	SMa1705									cluster_324
										SMa1797
										SMa0849	SMa0849
cluster_281
SMc02838
SMc02141										cluster_325
SMa1454	SMa1454									SMc03251
SMc03165	SMc03165									SMa0789	SMa0789
SMc02101
SMc00978
										cluster_326
										SM_b21093	SM_b21093
cluster_285										SMa0462
SMc00475
SM_b20523
SMc04143	SMc04143
										cluster_330
										SM_b20819
										SMa0789	SMa0789
cluster_287
SMa0246	SMa0246
SMc02897
SM_b20162	SM_b20162
										cluster_331
										SMc01182
										SMc00831	SMc00831
cluster_290
SMc00105
SMc02603
SMc00929	SMc00929									cluster_334
SMc03131										SMc04315	SMc04315
										SM_b20914
cluster_291
SM_b21336	SM_b21336									cluster_336
SMc01347										SMc00949
SMc01909										SMc03794
SMc04291										SMa2049	SMa2049
SMc02264										SM_b21484	SM_b21484
cluster_297										cluster_344
SMc02340	SMc02340									SMc04055	SMc04055
SMc03037										SMa0872
SMa0247										SMa0179	SMa0179
SMc02753										SMc03258	SMc03258
cluster_298										cluster_346
SMc02175	SMc02175									SMc01267
SMc02097										SMa0355	SMa0355
cluster_300										cluster_347
SMc03140	SMc03140									SMc01199
SM_b20162	SM_b20162									SM_b20033	SM_b20033
SMc03131										SMc00794	SMc00794
cluster_306										cluster_348
SMc04383										SMa0831
SMc04882	SMc04882									SM_b21169	SM_b21169
cluster_310										cluster_352
SMa0809										SMa2215	SMa2215
SMc01578										SM_b21115	SM_b21115
SMc01350
SMa2163	SMa2163
SMc03998	SMc03998
SMc00860
										cluster_354
										SMa1632	SMa1632
										SMc02773
cluster_312
SMc00088
SMc03891
SMc01593	SMc01593									cluster_356
SMc00786										SMc04203	SMc04203
SMc03770										SMc03287
SMc04260	SMc04260
SM_b20387	SM_b20387
										cluster_358
										SM_b21336	SM_b21336
cluster_313										SMc02351
SMc03124
SMc03123	SMc03123
										cluster_359
										SMa0771
cluster_314										SMa2049	SMa2049
SMa1893	SMa1893
SM_b20683	SM_b20683
SMc03151
										cluster_364
										SM_b20820
										SM_b21569	SM_b21569
cluster_319										SMc04363
SMc03015	SMc03015
SMc01354
SM_b21576	SM_b21576
										cluster_366
										SMc02030	SMc02030
										SMa1132
cluster_320
SMc01605
SMc03961
SMc04134	SMc04134
SM_b20123	SM_b20123									cluster_367
SMc02246										SM_b20586	SM_b20586
										SMc01995
cluster_321
SMc03210	SMc03210									cluster_369
SM_b20942										SMc02366	SMc02366
										SM_b20232
										SMc02523	SMc02523
cluster_322
SM_b20020
SM_b20021	SM_b20021									cluster_374
										SM_b20366	SM_b20366
										SM_b20365
cluster_323
SM_b21080	SM_b21080
SMc03830										cluster_375
SMc03874										SMa1207	SMa1207
										SMc03820	SMc03820
										SM_b21208	SM_b21208
cluster_325
SMc03978
SMa1893	SMa1893									cluster_376
SMc00877	SMc00877									SMa2215	SMa2215
										SMc00949
										SMc02584	SMc02584
cluster_329
SMc02235	SMc02235
SMc03998	SMc03998									cluster_377
SMc00791										SMc01403	SMc01403
										SMc02391
cluster_331
SMc02235	SMc02235									cluster_386
SMc00494										SM_b21210	SM_b21210
SMc00493										SM_b20516	SM_b20516
SMc03005
SMc00570
SMc00925
SMc02483
SMc00485										cluster_389
										SMc00942
										SMc01168	SMc01168
cluster_335
SMc00414
SMc04169	SMc04169									cluster_392
										SMc00251
										SMc00679	SMc00679
cluster_345
SM_b21641	SM_b21641
SMc02083										cluster_393
SMc04291										SM_b21706	SM_b21706
SMc04405										SMc00529
SMc01316
SMc00978
										cluster_394
										SMc02778
cluster_346										SMc02893	SMc02893
SMa1948	SMa1948
SMa0222	SMa0222
SMc02296
SMc04348	SMc04348
										cluster_396
										SMc03843	SMc03843
										SMc01195
cluster_348
SMa1387	SMa1387
SMc02166
SMc01108										cluster_397
SMc01909										SMa0846
										SMc00658	SMc00658
cluster_351
SMc01909										cluster_398
SMa1736	SMa1736									SMc00116
SMc04230										SMc01554
										SMc02523	SMc02523
cluster_355
SMc03037										cluster_403
SM_b21299	SM_b21299									SMc02851	SMc02851
SMc03038										SM_b20537	SM_b20537
										SM_b21533	SM_b21533
cluster_356
SMc00294										cluster_406
SMc01908	SMc01908									SMc01004
SMc01876										SMa0849	SMa0849
cluster_358										cluster_407
SMc00593										SMa0772
SMc00594										SMa0750	SMa0750
SM_b21021	SM_b21021									SMc03258	SMc03258
SMa0179	SMa0179
										cluster_409
cluster_361										SMa0498	SMa0498
SMc03874										SM_b20683	SM_b20683
SM_b21079	SM_b21079
										cluster_411
cluster_364										SMa0190	SMa0190
SMc02174										SMc03101
SM_b21169	SM_b21169									SM_b21158	SM_b21158
										SMa2167
cluster_366
SMa0190	SMa0190									cluster_413
SMc01289										SMc02340	SMc02340
SMc02404										SMc01551
										SM_b21649	SM_b21649
										SMc01945	SMc01945
cluster_370
SMc01918
SMc00620										cluster_417
SM_b20509	SM_b20509									SM_b20331
SMc01777										SMc04011	SMc04011
cluster_374										cluster_420
SMa2303	SMa2303									SMc02030	SMc02030
SMc00791										SMa2167
SMc01167
SMc01187
SMc01296
										cluster_421
										SMc00041
										SMc00329	SMc00329
cluster_376
SMc00785	SMc00785
SMc00528
SMc01092	SMc01092
										cluster_429
										SMc01762	SMc01762
										SMc03015	SMc03015
cluster_379
SM_b21009
SMc00241	SMc00241
SMc01225	SMc01225									cluster_436
SMc01018										SMc01551
SMc00176										SMc02140	SMc02140
										SM_b20953
										SMc00800
cluster_381
SMc00283	SMc00283
SMc03131										cluster_444
SM_b20123	SM_b20123									SMc02851	SMc02851
										SMc00864
cluster_383
SMc02447										cluster_446
SMa2303	SMa2303									SM_b21346	SM_b21346
SMc01664	SMc01664									SMc00270
cluster_384										cluster_447
SM_b21272	SM_b21272									SMc04051	SMc04051
SMc02634										SM_b20515
SMa2379
										cluster_449
cluster_385										SMa0498	SMa0498
SM_b20705										SMa0773
SMc04264	SMc04264
SMc03013
										cluster_466
										SMc01982
cluster_387										SM_b20004	SM_b20004
SMc00148
SM_b21372	SM_b21372
SMc00948
										cluster_478
										SMc00785	SMc00785
										SMc00529
cluster_388
SMc03927
SM_b21419	SM_b21419
										cluster_499
										SM_b20859	SM_b20859
										SM_b21574
cluster_392
SMc02911
SMa0815	SMa0815
SM_b20683	SM_b20683
										cluster_500
										SMc01563	SMc01563
										SMc01610	SMc01610
										SMc01229
cluster_395
SMc00070
SMc01269	SMc01269
SMc04010
SMc00575										cluster_512
SMc02941										SMc00766	SMc00766
SMc02470	SMc02470									SMc04239
cluster_397										cluster_539
SMa0498	SMa0498									SMc04032	SMc04032
SMc01364										SMc04313
SM_b20203	SM_b20203
SM_b20129	SM_b20129
										cluster_558
										SMa0815	SMa0815
cluster_398										SMc03252
SMc02305
SM_b21484	SM_b21484
SMc02063
SMc04385
SMc04175										cluster_566
SMc01152										SMa1456
										SMa5007	SMa5007
cluster_399
SMc01556										cluster_574
SMc01593	SMc01593									SMc04162	SMc04162
										SMc00163	SMc00163
cluster_401
SMc00618										cluster_577
SM_b21035										SMc02366	SMc02366
SMc00234										SMc01228
SM_b20106	SM_b20106
										cluster_581
cluster_402										SMc01406	SMc01406
SM_b20494	SM_b20494									SMc04337
SMc01531
SM_b21112
SMc01534
										cluster_584
										SMc00654	SMc00654
										SMc04239
cluster_403
SMc00163	SMc00163
SMc00155
SMc00363
SMc04162	SMc04162									cluster_589
SMc02910										SMc01651	SMc01651
SMc03846										SMc01975	SMc01975
SMc01215										SM_b20827
cluster_404										cluster_630
SMc01762	SMc01762									SM_b21294
SMc01852										SMc00479	SMc00479
SMc01235
										cluster_666
cluster_405										SM_b21180	SM_b21180
SMc00948										SMc00109	SMc00109
SMc01719
SMc00490	SMc00490
SMc02581
SMc02264
SMc01231										cluster_675
SMc00461										SM_b21535	SM_b21535
SMa1987	SMa1987									SMc04320
SMc01731
SMc01732
										cluster_707
										SMa0831
cluster_407										SMa0319	SMa0319
SMc01200
SMc00150
SMa2387	SMa2387
SM_b21491
										cluster_759
										SM_b21299	SM_b21299
										SMa1134
cluster_408
SMc02366	SMc02366
SM_b20556
SMc02523	SMc02523									cluster_836
SMc00791										SMc01748
SMc03775										SMa0267	SMa0267
cluster_415										cluster_837
SMc01428										SMa1966	SMa1966
SMc01563	SMc01563									SMa0753
SMc02884
SM_b20004	SM_b20004
cluster_423
SM_b20055	SM_b20055
SMc04410
SMc01723
SM_b21523
SMc04055	SMc04055
cluster_424
SMc00409
SMc00458	SMc00458
SMc03062
cluster_427
SMc01309
SM_b21093	SM_b21093
SMc01556
cluster_428
SMc01331
SMc00679	SMc00679
cluster_432
SMc04198
SMc01974	SMc01974
cluster_435
SM_b21117	SM_b21117
SMc00590
SM_b20366	SM_b20366
SMc01403	SMc01403
cluster_438
SM_b21641	SM_b21641
SM_b20949
cluster_440
SM_b20525	SM_b20525
SMc02181
cluster_441
SMc01283
SM_b21523
SMc02888	SMc02888
cluster_444
SMc01406	SMc01406
SMc04198
SM_b20285	SM_b20285
cluster_446
SMa0815	SMa0815
SMc01723
cluster_452
SMc00878	SMc00878
SM_b20392	SM_b20392
cluster_454
SMc01903
SMa0179	SMa0179
SMc02022	SMc02022
cluster_455
SMa0101
SMc03843	SMc03843
cluster_457
SMa2215	SMa2215
SMc01726
SM_b20457	SM_b20457
SM_b21080	SM_b21080
cluster_459
SMc00581
SMc02596	SMc02596
SMc02305
cluster_460
SMc00609
SMc04260	SMc04260
cluster_462
SM_b20808
SMc01570	SMc01570
cluster_463
SMc00878	SMc00878
SMc02737
cluster_467
SMc02094
SM_b21346	SM_b21346
SMc00362
SM_b21222	SM_b21222
cluster_471
SMc02568
SM_b21210	SM_b21210
cluster_472
SM_b20901	SM_b20901
SMc01052
SMc02543
cluster_474
SMa2107	SMa2107
SMc00327
cluster_482
SM_b21222	SM_b21222
SMc01801
SMc03832
cluster_486
SMc02495
SMc01223	SMc01223
SMc00394
cluster_487
SMc04315	SMc04315
SM_b21491
cluster_489
SMc04000
SMc03065
SM_b20582	SM_b20582
cluster_491
SMc00414
SM_b20215	SM_b20215
cluster_494
SMc02429	SMc02429
SMc00275	SMc00275
SM_b20755
cluster_498
SMc00070
SMc01610	SMc01610
cluster_499
SMa1954	SMa1954
SMc02242
SMc02170
cluster_506
SMc01330	SMc01330
SMc02174
cluster_507
SMc01275
SM_b21196
SMc02479
SMc01168	SMc01168
cluster_508
SMc00964
SM_b20367	SM_b20367
SMa1299	SMa1299
SMa0557	SMa0557
cluster_511
SMc01605
SMc01651	SMc01651
SMc00573
SMc01904
cluster_512
SMc02562
SMc00058	SMc00058
SMc01593	SMc01593
cluster_513
SMc00328
SMc03820	SMc03820
cluster_514
SM_b20705
SM_b21158	SM_b21158
SMc01357
cluster_515
SMc00654	SMc00654
SMc03967
cluster_516
SMa0114	SMa0114
SM_b21035
cluster_517
SMc02503
SMc02584	SMc02584
SMc01765
SMa0179	SMa0179
cluster_519
SMc01167
SM_b20667	SM_b20667
cluster_521
SMc03775
SMc02893	SMc02893
cluster_523
SM_b21630
SMc02647	SMc02647
SMc00572
cluster_524
SMc00878	SMc00878
SM_b21185
SM_b21600
cluster_527
SMc03884
SMc02140	SMc02140
cluster_528
SM_b20033	SM_b20033
SMc00433
SMc02717
SMc00235
cluster_530
SM_b20056
SMa2027	SMa2027
SM_b20211	SM_b20211
cluster_531
SMa0101
SMc03258	SMc03258
cluster_534
SMc00148
SMa0402	SMa0402
SM_b20264
SMa0114	SMa0114
cluster_535
SMc02306
SMc00558	SMc00558
cluster_536
SMc00365
SM_b20292
SMa1893	SMa1893
cluster_540
SMc03037
SM_b21533	SM_b21533
cluster_542
SM_b21706	SM_b21706
SMc00929	SMc00929
SMc03862
SM_b20285	SM_b20285
SMa2287	SMa2287
cluster_543
SMc02851	SMc02851
SMc03050
cluster_547
SMa0246	SMa0246
SMc00492
cluster_555
SMc04115
SMa1954	SMa1954
cluster_558
SMc04203	SMc04203
SMc03801
cluster_562
SMa2215	SMa2215
SM_b21115	SM_b21115
SMc00947
cluster_568
SMc00365
SMa2015	SMa2015
cluster_571
SMc01208
SM_b21525	SM_b21525
SM_b20039	SM_b20039
SMa1954	SMa1954
cluster_573
SMa0955	SMa0955
SM_b21181
cluster_578
SMc01787	SMc01787
SMc02686
cluster_582
SMc04175
SMa2049	SMa2049
cluster_587
SMc02103
SMc00766	SMc00766
cluster_588
SMc02307
SMa1454	SMa1454
cluster_593
SMc02636
SMc03899
SMc01593	SMc01593
cluster_594
SMc00820	SMc00820
SMc01834
SMc00017
SMc00163	SMc00163
SMa0319	SMa0319
cluster_600
SMc03893
SM_b21601	SM_b21601
cluster_603
SMc02647	SMc02647
SMc02796
cluster_604
SMc01316
SMc01287
SMa0849	SMa0849
cluster_605
SM_b20949
SMc01570	SMc01570
cluster_608
SMc02851	SMc02851
SMc03961
cluster_609
SMa1480	SMa1480
SMc00872
SM_b20999
cluster_610
SM_b20048	SM_b20048
SMc03775
cluster_612
SM_b21093	SM_b21093
SMc02246
cluster_613
SMc02779
SMc04011	SMc04011
cluster_616
SM_b20069
SMc00877	SMc00877
cluster_617
SMc03015	SMc03015
SMc01333
cluster_619
SMc00953	SMc00953
SM_b20899
cluster_622
SMc00608
SMc00820	SMc00820
cluster_623
SMc02495
SM_b21559	SM_b21559
cluster_625
SMc00488
SM_b20901	SM_b20901
cluster_626
SMc00953	SMc00953
SMc00375
SMc01202
cluster_627
SMa1480	SMa1480
SMc04277
cluster_632
SMc00023
SMc00490	SMc00490
cluster_639
SMa2163	SMa2163
SMc02181
cluster_643
SMc02062
SMa5007	SMa5007
cluster_644
SMc03013
SM_b21021	SM_b21021
cluster_645
SMc00458	SMc00458
SMc04230
SMc01610	SMc01610
cluster_646
SM_b20292
SMc02523	SMc02523
cluster_647
SMc00241	SMc00241
SMa1587
cluster_656
SMc02160
SMa0078	SMa0078
cluster_657
SMc02447
SMc02030	SMc02030
cluster_662
SMc00034
SMc00013
SMc02695
SM_b21008	SM_b21008
cluster_666
SMc04220	SMc04220
SM_b20219	SM_b20219
SMc04305
cluster_668
SMc01052
SM_b20258	SM_b20258
cluster_669
SMc00948
SM_b20509	SM_b20509
cluster_680
SMc00576
SM_b20859	SM_b20859
cluster_681
SMc01231
SMc04032	SMc04032
cluster_683
SMc00023
SM_b20516	SM_b20516
cluster_689
SMc00414
SMc01269	SMc01269
cluster_707
SM_b20154	SM_b20154
SMc00720
cluster_708
SMc00036
SMc02523	SMc02523
cluster_709
SM_b21196
SM_b20537	SM_b20537
cluster_712
SMc01187
SMc00785	SMc00785
cluster_716
SMc00698	SMc00698
SMc03066
cluster_717
SMc04109	SMc04109
SMc00975
cluster_718
SMc00878	SMc00878
SMa1736	SMa1736
cluster_730
SMc02366	SMc02366
SMc02846
cluster_749
SMc02274
SM_b21601	SM_b21601
cluster_754
SMc00328
SMa0498	SMa0498
cluster_755
SM_b21093	SM_b21093
SMc00021
cluster_763
SMc03005
SMc00109	SMc00109
cluster_766
SM_b20448
SMc01223	SMc01223
cluster_778
SMc01769
SM_b20457	SM_b20457
cluster_783
SMc00528
SMc00785	SMc00785
cluster_787
SMc00646	SMc00646
SMc04286
SM_b20072
cluster_788
SMc04175
SMa1387	SMa1387
cluster_792
SMc01330	SMc01330
SMc00916
SMa1602	SMa1602
cluster_797
SM_b21197
SMc02175	SMc02175
SMc02073
cluster_806
SMa2215	SMa2215
SM_b20806
cluster_811
SM_b20215	SM_b20215
SMc04286
cluster_818
SM_b21008	SM_b21008
SM_b21177
cluster_822
SMc02976	SMc02976
SMc04273
cluster_823
SMc01299
SM_b21169	SM_b21169
cluster_826
SM_b21525	SM_b21525
SMc01310
cluster_830
SMc03829
SMc01819	SMc01819
cluster_837
SM_b21569	SM_b21569
SMc04226
cluster_849
SMc02340	SMc02340
SMc02603
cluster_850
SM_b20806
SMa0078	SMa0078
cluster_877
SMc04315	SMc04315
SMc01875
cluster_894
SMc00610
SMc00877	SMc00877
cluster_899
SM_b20873
SM_b20106	SM_b20106
cluster_905
SMa0190	SMa0190
SMc02057
cluster_908
SMc02378
SM_b21210	SM_b21210
cluster_913
SMc00159
SMc02184	SMc02184
cluster_947
SMa0303	SMa0303
SMc02103
cluster_972
SMc04449
SMa0355	SMa0355
cluster_984
SMc01202
SMc01269	SMc01269
cluster_993
SMc00159
SMc02584	SMc02584
cluster_1008
SMa1067	SMa1067
SM_b21600
cluster_1020
SM_b20055	SM_b20055
SMc01333
cluster_1024
SMc03178
SM_b21464	SM_b21464
cluster_1045
SMc01285
SMa2287	SMa2287
cluster_1117
SM_b20935	SM_b20935
SMc00925
cluster_1118
SM_b20215	SM_b20215
SMc01357
