# Supplementary material for: Rhizobium etli CFN42 and Sinorhizobium meliloti 1021 bioinformatic transcriptional regulatory networks from culture and symbiosis
Source: Front Bioinform. 2024 Aug 28;4:1419274. doi: 10.3389/fbinf.2024.1419274 (PMC11387232; doi:10.3389/fbinf.2024.1419274)
Supplement: Supplementary file 2 [file Table3.xlsx]

## Sheet: Hoja1
a) Clustered-Tf MM R. etli CFN42 network																b) P-value distribution in the clustered-Tf MM network					c) Hierarchy															d) Times a gene is regulated
Locus_tag	Upstream_region	Matrix_ID	Chain	End_motif	Start_motif	Site	Weight	P_value	Ln_P_value	Significance		1146 Unique Targets	380 Unique Tfs			Pvalue	Counts	Percentage			Tfs	Genes regulated	Start position of the gene	End position of the gene	Strand-gene	GI	Name locus	Locus tag	Protein product	aa of the protein	COG number	COG group	Function	Number of the gene		Gene	Times-regulated gene	Start position of the gene	End position of the gene	Strand-gene	GI	Name locus	Locus tag	Protein product	aa of the protein	COG number	COG group	Function	Number of the gene
RHE_RS01855	D	RHE_RS33140_m1	D	-244	-233	GACACCATCTCT	11.1	2.1e-06	-13074	5678		RHE_RS00015	RHE_RS00185			e-04 R_MM_NETWORK_CFN42_DD_RR	37	0.410336			RHE_RS17050	49	3497982	3498683	D	24300689	-	RHE_RS17050	WP_007533606.1	233	COG0745	TK	MULTISPECIES: DNA-binding response regulator	3281		RHE_RS09360	30	1918934	1919281	D	24301473	yajC	RHE_RS09360	WP_011425121.1	115	COG1862	U	preprotein translocase subunit YajC	1804
RHE_RS15430	R	RHE_RS33140_m1	R	-16	-5	AGCACCTTCTTG	10.3	9.2e-06	-11596	5036		RHE_RS00040	RHE_RS00285			e-05 R_MM_NETWORK_CFN42_DD_RR	519	5.75579			RHE_RS00185	47	38852	39607	R	24299130	-	RHE_RS00185	WP_011423440.1	251	COG0745	TK	DNA-binding response regulator	35		RHE_RS09355	30	1917858	1918730	R	24297666	-	RHE_RS09355	WP_011425120.1	290	COG2607	R	DUF815 domain-containing protein	1803
RHE_RS02055	D	RHE_RS33140_m2	D	-287	-271	ATGAAAGGAAGTTGCTG	10.1	4.5e-06	-12311	5347		RHE_RS00045	RHE_RS00340			e-06 R_MM_NETWORK_CFN42_DD_RR	5837	64.7333			RHE_RS20580	44	4262380	4263243	D	24299232	-	RHE_RS20580	WP_011427212.1	287	COG0568	K	MULTISPECIES: RNA polymerase factor sigma-32	3969		RHE_RS24105	28	21641	22933	D	24302742	-	RHE_RS24105	WP_011427875.1	430	COG2271	G	MFS transporter	4620
RHE_RS04950	R	RHE_RS33140_m2	R	-254	-238	AAGAAACGCTTGTGCAA	12.3	1.2e-06	-13633	5921		RHE_RS00065	RHE_RS00380			e-07 R_MM_NETWORK_CFN42_DD_RR	1155	12.8091			RHE_RS05945	43	1213098	1213820	R	24301194	-	RHE_RS05945	WP_011424499.1	240	COG2197	TK	LuxR family transcriptional regulator	1137		RHE_RS00340	27	70995	71777	D	24301178	-	RHE_RS00340	WP_011423463.1	260	COG2197	TK	DNA-binding response regulator	59
RHE_RS04955	D	RHE_RS33140_m2	D	-32	-16	AAGAAACGCTTGTGCAA	12.3	1.2e-06	-13633	5921		RHE_RS00070	RHE_RS00415			e-08 R_MM_NETWORK_CFN42_DD_RR	455	5.04602			RHE_RS06405	42	1301853	1302284	D	24300714	-	RHE_RS06405	WP_011424588.1	143	COG4957	K	MULTISPECIES: transcriptional regulator	1230		RHE_RS01550	25	314661	315023	R	24301221	-	RHE_RS01550	WP_011423690.1	120	COG0797	M	septal ring lytic transglycosylase RlpA family protein	293
RHE_RS26030	R	RHE_RS33140_m2	R	-103	-87	AAGAAAATAATTTGCAA	10.8	3.4e-06	-12592	5469		RHE_RS00105	RHE_RS00725			e-09 R_MM_NETWORK_CFN42_DD_RR	303	3.36032			RHE_RS12775	36	2612840	2613739	R	24299845	-	RHE_RS12775	WP_011425753.1	299	COG0583	K	LysR family transcriptional regulator	2466		RHE_RS20015	24	4143624	4144160	R	24298948	-	RHE_RS20015	WP_011427106.1	178	COG0221	CP	MULTISPECIES: inorganic diphosphatase	3854
RHE_RS30890	R	RHE_RS33140_m2	R	-249	-233	ATGAAGATGCTGTGCAG	8.1	8.4e-06	-11687	5076		RHE_RS00155	RHE_RS00765			e-10 R_MM_NETWORK_CFN42_DD_RR	242	2.68382			RHE_RS02355	35	476830	478077	R	24300066	-	RHE_RS02355	WP_011423842.1	415	COG1846	K	ROK family transcriptional regulator	448		RHE_RS09800	24	1999859	2000986	D	24299935	rseP	RHE_RS09800	WP_011425197.1	375	COG0750	OK	RIP metalloprotease RseP	1886
RHE_RS33140	D	RHE_RS33140_m2	D	-359	-343	AAGAAGGTGTCGTGCGC	13.4	3.0e-07	-15019	6523		RHE_RS00185	RHE_RS00855			e-11 R_MM_NETWORK_CFN42_DD_RR	145	1.60807			RHE_RS15890	33	3254161	3254610	D	24301077	-	RHE_RS15890	WP_042119308.1	149	COG1846	K	MarR family transcriptional regulator	3056		RHE_RS16530	23	3395448	3396155	D	24301052	-	RHE_RS16530	WP_011426465.1	235			autoaggregation protein	3179
RHE_RS33140	D	RHE_RS33140_m2	D	-116	-100	ATGAACAGATGGTGCTG	12.4	1.0e-06	-13816	6000		RHE_RS00190	RHE_RS01095			e-12 R_MM_NETWORK_CFN42_DD_RR	123	1.36409			RHE_RS15800	33	3234046	3234363	D	24300595	-	RHE_RS15800	WP_011426325.1	105	COG0640	K	ArsR family transcriptional regulator	3038		RHE_RS16350	23	3355243	3356196	D	24301188	-	RHE_RS16350	WP_011426430.1	317	COG0451	M	MULTISPECIES: UDP-glucose 4-epimerase	3145
RHE_RS02620	D	RHE_RS33140_m3	D	-73	-63	GCGTGATAAGC	10.9	1.1e-06	-13720	5959		RHE_RS00255	RHE_RS01265			e-13 R_MM_NETWORK_CFN42_DD_RR	72	0.798492			RHE_RS27560	32	231496	232599	D	24303131	-	RHE_RS27560	WP_011428526.1	367	COG1609	K	LacI family DNA-binding transcriptional regulator	5301		RHE_RS17305	22	3555954	3556691	R	24300827	-	RHE_RS17305	WP_011426616.1	245	COG0664	T	Crp/Fnr family transcriptional regulator	3332
RHE_RS03545	D	RHE_RS33140_m3	D	-164	-154	GGGTAATAATC	9.7	3.2e-06	-12652	5495		RHE_RS00275	RHE_RS01350			e-14 R_MM_NETWORK_CFN42_DD_RR	51	0.565598			RHE_RS24090	32	18952	19392	D	24302745	-	RHE_RS24090	WP_011427872.1	146	COG3279	KT	response regulator	4617		RHE_RS17050	22	3497982	3498683	D	24300689	-	RHE_RS17050	WP_007533606.1	233	COG0745	TK	MULTISPECIES: DNA-binding response regulator	3281
RHE_RS10795	D	RHE_RS33140_m3	D	-13	-3	GGGTGAGAAGC	9.2	5.9e-06	-12041	5229		RHE_RS00285	RHE_RS01430			e-15 R_MM_NETWORK_CFN42_DD_RR	32	0.354885			RHE_RS17835	32	3677381	3677716	D	24297846	-	RHE_RS17835	WP_011426713.1	111	COG0640	K	ArsR family transcriptional regulator	3429		RHE_RS17020	22	3494479	3495201	D	24297670	-	RHE_RS17020	WP_020922107.1	240	COG2148	M	exopolysaccharide production protein Pss 1	3275
RHE_RS21275	D	RHE_RS33140_m3	D	-120	-110	GGGTGTTAATC	9.6	3.7e-06	-12507	5432		RHE_RS00300	RHE_RS01475			e-16 R_MM_NETWORK_CFN42_DD_RR	30	0.332705			RHE_RS05495	32	1129379	1129708	R	24297494	-	RHE_RS05495	WP_011424419.1	109	COG0640	K	ArsR family transcriptional regulator	1055		RHE_RS25500	21	317010	317789	R	24302463	-	RHE_RS25500	WP_011428136.1	259	COG1120	PH	iron-hydroxamate transporter ATP-binding protein	4891
RHE_RS30890	R	RHE_RS33140_m3	R	-385	-375	GGGTGATAAGC	14.9	1.4e-07	-15782	6854		RHE_RS00340	RHE_RS01480			e-17 R_MM_NETWORK_CFN42_DD_RR	7	0.0776311			RHE_RS28370	30	420757	421419	D	24302969	-	RHE_RS28370	WP_086005059.1	220	COG1309	K	TetR/AcrR family transcriptional regulator	5460		RHE_RS23370	21	111441	112508	D	24302175	-	RHE_RS23370	WP_011427731.1	355	COG3842	E	ABC transporter ATP-binding protein	4477
RHE_RS33140	D	RHE_RS33140_m3	D	-389	-379	GGGTGATAAGC	14.9	1.4e-07	-15782	6854		RHE_RS00365	RHE_RS01660			e-18 R_MM_NETWORK_CFN42_DD_RR	3	0.0332705			RHE_RS25595	30	339020	339547	D	24302444	-	RHE_RS25595	WP_011428155.1	175	COG5631	K	transcriptional regulator	4910		RHE_RS23365	21	109463	111103	R	24302176	-	RHE_RS23365	WP_011427730.1	546	COG1653	G	sugar ABC transporter substrate-binding protein	4476
RHE_RS33140	D	RHE_RS33140_m3	D	-313	-303	GGGTGATAATC	14.8	2.9e-07	-15053	6538		RHE_RS00380	RHE_RS01720			e-19 R_MM_NETWORK_CFN42_DD_RR	5	0.0554508			RHE_RS23775	30	197007	197912	D	24302094	-	RHE_RS23775	WP_011427811.1	301	COG0583	K	LysR family transcriptional regulator	4556		RHE_RS17045	21	3497191	3497544	R	24301017	-	RHE_RS17045	WP_011426566.1	117			MULTISPECIES: hypothetical protein	3280
RHE_RS28020	D	RHE_RS33140_m4	D	-48	-23	TAACGGCATCCGGATCAAAGCCGATG	6.6	9.3e-06	-11585	5032		RHE_RS00410	RHE_RS01740			e-20 R_MM_NETWORK_CFN42_DD_RR	1	0.0110902			RHE_RS23635	30	170069	170533	R	24302122	-	RHE_RS23635	WP_011427784.1	154	COG1522	K	Lrp/AsnC family transcriptional regulator	4528		RHE_RS22160	20	34769	36406	D	24302010	-	RHE_RS22160	WP_011427498.1	545	COG0747	E	ABC transporter substrate-binding protein	4242
RHE_RS33140	D	RHE_RS33140_m4	D	-232	-207	TCACGAAATGCAAGATCCGCCGGATA	15.1	5.7e-08	-16680	7244		RHE_RS00415	RHE_RS01980			total tf gen Targets	9017	100			RHE_RS00415	30	88137	88814	R	24298097	-	RHE_RS00415	WP_011423478.1	225	COG1309	K	TetR/AcrR family transcriptional regulator	74		RHE_RS24620	19	135424	136116	D	24302639	-	RHE_RS24620	WP_041679057.1	230	COG1802	K	GntR family transcriptional regulator	4723
RHE_RS26765	D	RHE_RS33140_m5	D	-27	-11	GGAGAAGCCCGCCGAGG	9.9	1.9e-06	-13174	5721		RHE_RS00460	RHE_RS02045								RHE_RS16230	29	3329555	3330778	R	24299188	-	RHE_RS16230	WP_011426407.1	407	COG1846	K	ROK family transcriptional regulator	3123		RHE_RS11950	19	2439151	2439534	R	24299677	-	RHE_RS11950	WP_011425598.1	127	COG2198	T	Hpt domain-containing protein	2311
RHE_RS33140	D	RHE_RS33140_m5	D	-94	-78	GAAGAAGAACGCCGAGG	13.0	5.5e-07	-14413	6260		RHE_RS00465	RHE_RS02165								RHE_RS06875	29	1403628	1404503	R	24299772	-	RHE_RS06875	WP_020920841.1	291	COG1737	K	MurR/RpiR family transcriptional regulator	1324		RHE_RS27560	18	231496	232599	D	24303131	-	RHE_RS27560	WP_011428526.1	367	COG1609	K	LacI family DNA-binding transcriptional regulator	5301
RHE_RS18665	R	RHE_RS32675_m1	R	-37	-21	CATTAGCGCCAAATTTG	7.3	8.5e-06	-11675	5071		RHE_RS00475	RHE_RS02310								RHE_RS20575	28	4261433	4262005	D	24299984	-	RHE_RS20575	WP_011427211.1	190	COG1329	K	MULTISPECIES: CarD family transcriptional regulator	3968		RHE_RS27555	18	230207	231169	R	24303132	-	RHE_RS27555	WP_011428525.1	320	COG1879	G	MULTISPECIES: ABC transporter substrate-binding protein	5300
RHE_RS24755	R	RHE_RS32675_m1	R	-61	-45	AAGATGCGCCAAAGTTG	15.1	5.2e-08	-16772	7284		RHE_RS00480	RHE_RS02315								RHE_RS17305	28	3555954	3556691	R	24300827	-	RHE_RS17305	WP_011426616.1	245	COG0664	T	Crp/Fnr family transcriptional regulator	3332		RHE_RS16205	18	3324677	3325684	D	24299726	-	RHE_RS16205	WP_011426402.1	335	COG0583	K	LysR family transcriptional regulator	3118
RHE_RS24760	D	RHE_RS32675_m1	D	-78	-62	AAGATGCGCCAAAGTTG	15.1	5.2e-08	-16772	7284		RHE_RS00525	RHE_RS02340								RHE_RS17200	28	3535166	3535630	R	24298572	-	RHE_RS17200	WP_011426596.1	154	COG1959	K	Rrf2 family transcriptional regulator	3311		RHE_RS16200	18	3323341	3324405	R	24299827	-	RHE_RS16200	WP_011426401.1	354	COG4213	G	MULTISPECIES: sugar ABC transporter substrate-binding protein	3117
RHE_RS32675	R	RHE_RS32675_m1	R	-235	-219	CACTTGCGCCAAATTGG	16.6	9.0e-09	-18526	8046		RHE_RS00550	RHE_RS02355								RHE_RS16100	28	3296911	3300312	R	24299341	-	RHE_RS16100	WP_011426382.1	1133	COG0784	T	hybrid sensor histidine kinase/response regulator	3097		RHE_RS15905	18	3257088	3257672	R	24299970	-	RHE_RS15905	WP_011426346.1	194	COG4094	S	nitrate reductase	3059
RHE_RS32675	R	RHE_RS32675_m1	R	-48	-32	TAAATGCGCCAAAGCTC	16.0	2.0e-08	-17728	7699		RHE_RS00575	RHE_RS02600								RHE_RS14875	28	3045950	3046660	D	24301275	-	RHE_RS14875	WP_011426154.1	236	COG1802	K	GntR family transcriptional regulator	2863		RHE_RS08065	18	1659686	1659928	R	24297490	-	RHE_RS08065	WP_011424905.1	80			BON domain-containing protein	1558
RHE_RS32675	R	RHE_RS32675_m2	R	-367	-355	GACCAATCACGGC	10.6	5.8e-06	-12058	5237		RHE_RS00595	RHE_RS02710								RHE_RS12060	28	2468122	2469075	R	24298773	-	RHE_RS12060	WP_011425620.1	317	COG1879	G	LacI family transcriptional regulator	2331		RHE_RS26875	17	87772	88770	R	24303268	-	RHE_RS26875	WP_073990435.1	332	COG1609	K	LacI family DNA-binding transcriptional regulator	5164
RHE_RS09650	D	RHE_RS32675_m3	D	-393	-374	TGGCATTGAACTCTGTCGAA	11.6	5.0e-07	-14509	6301		RHE_RS00670	RHE_RS02715								RHE_RS28710	27	491401	491865	D	24302901	-	RHE_RS28710	WP_011428743.1	154	COG1522	K	Lrp/AsnC family transcriptional regulator	5526		RHE_RS18695	17	3871372	3872838	D	24298016	-	RHE_RS18695	WP_011426869.1	488	COG0008	J	glutamate--tRNA ligase	3600
RHE_RS24455	R	RHE_RS32675_m3	R	-230	-211	GCGCAATTACGCCAGTCGGC	10.6	1.0e-06	-13816	6000		RHE_RS00680	RHE_RS02765								RHE_RS25540	27	325094	325906	R	24302455	-	RHE_RS25540	WP_011428144.1	270	COG1349	KG	MULTISPECIES: DeoR/GlpR transcriptional regulator	4899		RHE_RS18015	17	3714659	3716401	D	24297797	-	RHE_RS18015	WP_082239842.1	580	COG0840	NT	chemotaxis protein	3465
RHE_RS00105	D	RHE_RS32675_m4	D	-49	-37	ATGCAAATTGGCT	9.1	8.6e-06	-11664	5066		RHE_RS00695	RHE_RS02835								RHE_RS18085	27	3727018	3727914	R	24299192	-	RHE_RS18085	WP_042119332.1	298	COG0583	K	LysR family transcriptional regulator	3479		RHE_RS18010	17	3713992	3714321	R	24301430	-	RHE_RS18010	WP_011426745.1	109			hypothetical protein	3464
RHE_RS11590	R	RHE_RS32675_m4	R	-164	-152	CGCCAATATGGCG	11.1	2.2e-06	-13027	5658		RHE_RS00700	RHE_RS02855								RHE_RS11740	27	2395572	2396306	R	24300701	-	RHE_RS11740	WP_011425557.1	244	COG1802	K	GntR family transcriptional regulator	2269		RHE_RS12580	17	2573694	2574926	R	24299651	-	RHE_RS12580	WP_011425717.1	410	COG1653	G	carbohydrate ABC transporter substrate-binding protein	2428
RHE_RS19670	R	RHE_RS32675_m4	R	-25	-13	TTCTAAATTGGCT	10.0	5.1e-06	-12186	5292		RHE_RS00705	RHE_RS03000								RHE_RS06620	27	1341246	1341992	D	24298453	-	RHE_RS06620	WP_041678849.1	248	COG0745	TK	DNA-binding response regulator	1272		RHE_RS12170	17	2490643	2492544	R	24299841	-	RHE_RS12170	WP_011425641.1	633	COG2989	M	peptidoglycan-binding protein	2353
RHE_RS19835	R	RHE_RS32675_m4	R	-108	-96	CTCCAAATTGGCG	12.7	6.5e-07	-14246	6187		RHE_RS00725	RHE_RS03040								RHE_RS00855	27	182424	183161	D	24298508	phnF	RHE_RS00855	WP_011423562.1	245	COG2188	K	phosphonate metabolism transcriptional regulator PhnF	161		RHE_RS11740	17	2395572	2396306	R	24300701	-	RHE_RS11740	WP_011425557.1	244	COG1802	K	GntR family transcriptional regulator	2269
RHE_RS19840	D	RHE_RS32675_m4	D	-45	-33	CTCCAAATTGGCG	12.7	6.5e-07	-14246	6187		RHE_RS00735	RHE_RS03085								RHE_RS25725	26	360991	361899	D	24302418	-	RHE_RS25725	WP_042119897.1	302	COG0583	K	LysR family transcriptional regulator	4936		RHE_RS20550	16	4254535	4255260	D	24301094	-	RHE_RS20550	WP_011427206.1	241	COG1028	IQR	beta-ketoacyl-ACP reductase	3962
RHE_RS20280	R	RHE_RS32675_m4	R	-134	-122	CTGCAATTTGGCG	9.3	7.7e-06	-11774	5114		RHE_RS00740	RHE_RS03175								RHE_RS25040	26	229680	230603	R	24302555	-	RHE_RS25040	WP_011428050.1	307	COG4189	K	transcriptional regulator	4804		RHE_RS20315	16	4201301	4201639	R	24297679	-	RHE_RS20315	WP_007632398.1	112	COG0347	TE	MULTISPECIES: nitrogen regulatory protein P-II	3916
RHE_RS20285	D	RHE_RS32675_m4	D	-51	-39	CTGCAATTTGGCG	9.3	7.7e-06	-11774	5114		RHE_RS00745	RHE_RS03180								RHE_RS05330	26	1099101	1099445	R	24297929	-	RHE_RS05330	WP_011424390.1	114	COG0640	K	ArsR family transcriptional regulator	1025		RHE_RS12175	16	2492946	2494337	D	24299840	fumC	RHE_RS12175	WP_011425642.1	463	COG0114	C	class II fumarate hydratase	2354
RHE_RS28220	R	RHE_RS32675_m4	R	-188	-176	TGCCAAAATGGCT	9.0	9.1e-06	-11607	5041		RHE_RS00760	RHE_RS03210								RHE_RS26495	25	14842	15837	R	24303344	-	RHE_RS26495	WP_042119940.1	331	COG0583	K	LysR family transcriptional regulator	5089		RHE_RS11955	16	2439999	2446973	D	24299208	-	RHE_RS11955	WP_011425599.1	2324	COG1196	D	membrane protein	2312
RHE_RS28225	D	RHE_RS32675_m4	D	-35	-23	TGCCAAAATGGCT	9.0	9.1e-06	-11607	5041		RHE_RS00765	RHE_RS03275								RHE_RS19425	25	4026829	4027188	R	24300902	-	RHE_RS19425	WP_010028815.1	119	COG2204	T	MULTISPECIES: response regulator	3738		RHE_RS01870	16	381290	382543	R	24297782	-	RHE_RS01870	WP_011423752.1	417	COG0192	H	methionine adenosyltransferase	355
RHE_RS32675	R	RHE_RS32675_m4	R	-237	-225	CGCCAAATTGGCT	13.2	5.2e-07	-14469	6284		RHE_RS00855	RHE_RS03430								RHE_RS18970	25	3931874	3932926	D	24299008	-	RHE_RS18970	WP_011426920.1	350	COG1609	K	LacI family DNA-binding transcriptional regulator	3654		RHE_RS00190	16	39928	41538	D	24298518	-	RHE_RS00190	WP_011423441.1	536	COG1866	C	phosphoenolpyruvate carboxykinase (ATP)	36
RHE_RS32675	R	RHE_RS32675_m4	R	-107	-95	ATCTAATTTGGCG	12.7	6.5e-07	-14246	6187		RHE_RS00870	RHE_RS03515								RHE_RS14135	25	2879011	2879475	R	24298124	-	RHE_RS14135	WP_011426008.1	154	COG1522	K	Lrp/AsnC family transcriptional regulator	2719		RHE_RS00185	16	38852	39607	R	24299130	-	RHE_RS00185	WP_011423440.1	251	COG0745	TK	DNA-binding response regulator	35
RHE_RS04310	D	RHE_RS32675_m5	D	-12	-3	CACATAGACA	10.4	6.4e-06	-11959	5194		RHE_RS00880	RHE_RS03610								RHE_RS01660	25	333968	334432	D	24300225	-	RHE_RS01660	WP_011423712.1	154	COG1522	K	Lrp/AsnC family transcriptional regulator	314		RHE_RS25865	15	389345	389752	D	24302390	-	RHE_RS25865	WP_011428207.1	135	COG2128	P	MULTISPECIES: carboxymuconolactone decarboxylase family protein	4964
RHE_RS12965	R	RHE_RS32675_m5	R	-89	-80	CACATAGACC	10.5	6.0e-06	-12024	5222		RHE_RS00885	RHE_RS03720								RHE_RS25455	24	308167	309120	R	24302472	-	RHE_RS25455	WP_011428127.1	317	COG0583	K	LysR family transcriptional regulator	4882		RHE_RS20575	15	4261433	4262005	D	24299984	-	RHE_RS20575	WP_011427211.1	190	COG1329	K	MULTISPECIES: CarD family transcriptional regulator	3968
RHE_RS32435	D	RHE_RS32675_m5	D	-296	-287	TACATAGACC	12.6	6.7e-07	-14216	6174		RHE_RS00895	RHE_RS03775								RHE_RS24980	24	214520	215446	D	24302567	-	RHE_RS24980	WP_011428041.1	308	COG2207	K	AraC family transcriptional regulator	4794		RHE_RS07510	15	1545220	1545642	D	24299627	-	RHE_RS07510	WP_011424805.1	140	COG0105	F	MULTISPECIES: nucleoside-diphosphate kinase	1452
RHE_RS32675	R	RHE_RS32675_m5	R	-188	-179	GACATAGATC	11.8	3.2e-06	-12652	5495		RHE_RS00990	RHE_RS04010								RHE_RS23945	24	231024	232037	R	24302060	-	RHE_RS23945	WP_041678980.1	337	COG1609	K	LacI family transcriptional regulator	4591		RHE_RS06955	15	1426050	1426829	R	24299910	-	RHE_RS06955	WP_011424698.1	259	COG2197	TK	DNA-binding response regulator	1339
RHE_RS32675	R	RHE_RS32675_m5	R	-182	-173	TACATAGACA	12.5	8.7e-07	-13955	6060		RHE_RS00995	RHE_RS04025								RHE_RS17595	24	3626357	3627247	R	24298709	-	RHE_RS17595	WP_011426669.1	296	COG0662	G	AraC family transcriptional regulator	3382		RHE_RS00300	15	61011	61958	R	24300260	-	RHE_RS00300	WP_011423462.1	315	COG2423	E	ornithine cyclodeaminase family protein	58
RHE_RS01845	D	RHE_RS32555_m1	D	-50	-33	TCAAACCTCGATATCGGG	10.2	5.3e-06	-12148	5276		RHE_RS01005	RHE_RS04030								RHE_RS10220	24	2081072	2085139	D	24298335	-	RHE_RS10220	WP_042118412.1	1355			XRE family transcriptional regulator	1969		RHE_RS28775	14	506095	507972	R	24302888	-	RHE_RS28775	WP_011428756.1	625	COG0840	NT	methyl-accepting chemotaxis protein	5539
RHE_RS32555	R	RHE_RS32555_m1	R	-80	-63	TCAAAGCTCGAGACCGGA	14.9	1.0e-08	-18421	8000		RHE_RS01020	RHE_RS04065								RHE_RS06955	24	1426050	1426829	R	24299910	-	RHE_RS06955	WP_011424698.1	259	COG2197	TK	DNA-binding response regulator	1339		RHE_RS18970	14	3931874	3932926	D	24299008	-	RHE_RS18970	WP_011426920.1	350	COG1609	K	LacI family DNA-binding transcriptional regulator	3654
RHE_RS00995	R	RHE_RS32555_m2	R	-112	-85	ATCTTCCCCAACCTCCGGAGCGGTCAAG	6.4	3.3e-06	-12622	5481		RHE_RS01035	RHE_RS04310								RHE_RS03720	24	772463	772945	D	24300176	rirA	RHE_RS03720	WP_011424096.1	160	COG1959	K	MULTISPECIES: transcriptional regulator	710		RHE_RS15875	14	3250529	3251569	D	24298780	-	RHE_RS15875	WP_011426340.1	346	COG0174	E	MULTISPECIES: glutamine synthetase	3053
RHE_RS02310	R	RHE_RS32555_m2	R	-111	-84	AATTCGCATCCGGTCGCATTTGCTCATG	4.3	9.6e-06	-11554	5018		RHE_RS01055	RHE_RS04315								RHE_RS03000	24	612592	613485	D	24300061	-	RHE_RS03000	WP_011423958.1	297	COG0583	K	LysR family transcriptional regulator	570		RHE_RS12585	14	2575379	2576422	D	24299650	-	RHE_RS12585	WP_020921520.1	347	COG1609	K	MULTISPECIES: LacI family DNA-binding transcriptional regulator	2429
RHE_RS32555	R	RHE_RS32555_m2	R	-170	-143	ATCTCTCATTCCCTAGGCTTTCGTCATG	24.8	8.1e-13	-27842	12092		RHE_RS01075	RHE_RS04575								RHE_RS27240	23	165065	165433	R	24303195	-	RHE_RS27240	WP_011428463.1	122	COG1733	K	transcriptional regulator	5239		RHE_RS07275	14	1495674	1497050	R	24299551	-	RHE_RS07275	WP_011424760.1	458	COG0215	J	cysteine--tRNA ligase	1404
RHE_RS07480	R	RHE_RS32555_m3	R	-119	-90	GCGAGCTTTGAAAAAATCCTCCGCGCGAGA	2.9	2.9e-06	-12751	5538		RHE_RS01080	RHE_RS04645								RHE_RS26790	23	72240	73412	D	24303285	-	RHE_RS26790	WP_011428382.1	390	COG0664	T	transcriptional regulator	5147		RHE_RS07140	14	1473343	1473684	D	24299268	-	RHE_RS07140	WP_011424734.1	113			hypothetical protein	1377
RHE_RS16755	R	RHE_RS32555_m3	R	-34	-5	ACTCGTCTTCTCACCGTTATCTGTTCCAGA	6.5	4.4e-07	-14636	6357		RHE_RS01095	RHE_RS05000								RHE_RS18795	23	3890006	3890860	D	24300242	-	RHE_RS18795	WP_011426888.1	284	COG1737	K	MULTISPECIES: MurR/RpiR family transcriptional regulator	3620		RHE_RS03390	14	688784	689692	D	24301090	-	RHE_RS03390	WP_011424035.1	302	COG1344	N	flagellin	648
RHE_RS16760	D	RHE_RS32555_m3	D	-247	-218	ACTCGTCTTCTCACCGTTATCTGTTCCAGA	6.5	4.4e-07	-14636	6357		RHE_RS01135	RHE_RS05170								RHE_RS16415	23	3370721	3371146	R	24301505	-	RHE_RS16415	WP_011426443.1	141	COG1396	K	XRE family transcriptional regulator	3157		RHE_RS03180	14	648955	649659	D	24300680	-	RHE_RS03180	WP_011423993.1	234	COG2197	TK	helix-turn-helix transcriptional regulator	606
RHE_RS32555	R	RHE_RS32555_m3	R	-75	-46	ACTAGTTTTCCAAACCTTCAAAGCTCGAGA	37.8	3.0e-19	-42651	18523		RHE_RS01155	RHE_RS05215								RHE_RS10580	23	2158259	2159314	R	24299419	-	RHE_RS10580	WP_011425334.1	351	COG1609	K	LacI family transcriptional regulator	2042		RHE_RS30785	13	292583	292915	D	24297275	-	RHE_RS30785	WP_010022281.1	110			MULTISPECIES: hypothetical protein	5918
RHE_RS26875	R	RHE_RS32555_m5	R	-314	-302	GCAAACCTATCTG	11.6	1.2e-06	-13633	5921		RHE_RS01160	RHE_RS05255								RHE_RS07685	23	1583044	1583559	D	24299318	-	RHE_RS07685	WP_004673822.1	171	COG1846	K	MULTISPECIES: MarR family transcriptional regulator	1487		RHE_RS30570	13	253590	254093	R	24297136	-	RHE_RS30570	WP_010069248.1	167	COG1396	K	MULTISPECIES: XRE family transcriptional regulator	5883
RHE_RS32555	R	RHE_RS32555_m5	R	-20	-8	ATAAACCTATCTA	15.7	9.8e-09	-18441	8009		RHE_RS01260	RHE_RS05265								RHE_RS06015	23	1225501	1225983	R	24300982	-	RHE_RS06015	WP_011424512.1	160	COG1846	K	MarR family transcriptional regulator	1151		RHE_RS27970	13	332533	333786	D	24303049	-	RHE_RS27970	WP_086005058.1	417	COG1653	G	carbohydrate ABC transporter substrate-binding protein	5382
RHE_RS07290	R	RHE_RS32435_m1	R	-213	-185	CAAATGGCAATTGCCGGACGGCGGGTCAA	15.1	1.3e-08	-18158	7886		RHE_RS01265	RHE_RS05315								RHE_RS01350	23	278641	279549	D	24301226	-	RHE_RS01350	WP_011423652.1	302	COG0583	K	LysR family transcriptional regulator	256		RHE_RS27645	13	250775	251488	D	24303114	-	RHE_RS27645	WP_011428542.1	237	COG2186	K	FadR family transcriptional regulator	5316
RHE_RS18225	R	RHE_RS32435_m1	R	-228	-200	GGAAGAACTATAGCGTGAAAGCCCGTCTG	5.7	5.9e-06	-12041	5229		RHE_RS01315	RHE_RS05330								RHE_RS00380	23	79584	80612	D	24301112	-	RHE_RS00380	WP_011423471.1	342	COG1609	K	LacI family transcriptional regulator	67		RHE_RS25040	13	229680	230603	R	24302555	-	RHE_RS25040	WP_011428050.1	307	COG4189	K	transcriptional regulator	4804
RHE_RS30745	R	RHE_RS32435_m1	R	-84	-56	CGAATAGCGCCTACCGGACTACCAGTCTA	25.3	5.6e-13	-28211	12252		RHE_RS01320	RHE_RS05380								RHE_RS27935	22	322860	324011	D	24303056	-	RHE_RS27935	WP_011428597.1	383	COG1846	K	ROK family transcriptional regulator	5375		RHE_RS20490	13	4243847	4244623	D	24300911	-	RHE_RS20490	WP_020922551.1	258	COG1349	KG	DeoR/GlpR transcriptional regulator	3950
RHE_RS09535	D	RHE_RS32435_m2	D	-28	-8	CCGAAAATGTCTGGAGACGGG	11.8	6.0e-07	-14326	6222		RHE_RS01350	RHE_RS05495								RHE_RS26280	22	477117	477902	D	24302307	-	RHE_RS26280	WP_011428285.1	261	COG1414	K	IclR family transcriptional regulator	5047		RHE_RS20485	13	4242808	4243581	R	24300912	-	RHE_RS20485	WP_011427194.1	257	COG0834	ET	amino acid ABC transporter substrate-binding protein	3949
RHE_RS24400	R	RHE_RS32435_m2	R	-123	-103	CGGCAAGAGGAGAGAGACGGG	10.6	3.0e-06	-12717	5523		RHE_RS01360	RHE_RS05510								RHE_RS20625	22	4274347	4275123	D	24297746	-	RHE_RS20625	WP_020922565.1	258	COG2188	K	GntR family transcriptional regulator	3978		RHE_RS18760	13	3884712	3885695	D	24300223	-	RHE_RS18760	WP_011426881.1	327	COG2390	K	sugar-binding transcriptional regulator	3613
RHE_RS32435	D	RHE_RS32435_m2	D	-117	-97	TGGAAAGGTGAGGTGGACATT	10.9	2.3e-06	-12983	5638		RHE_RS01430	RHE_RS05730								RHE_RS17090	22	3504521	3505429	D	24301374	-	RHE_RS17090	WP_011426574.1	302	COG0568	K	RNA polymerase sigma factor RpoH	3289		RHE_RS18680	13	3868538	3869218	D	24298133	-	RHE_RS18680	WP_011426866.1	226	COG1309	K	TetR/AcrR family transcriptional regulator	3597
RHE_RS32435	D	RHE_RS32435_m2	D	-97	-77	TTGAGCGTGGCTATAGACGGG	12.6	1.8e-07	-15530	6745		RHE_RS01475	RHE_RS05735								RHE_RS13180	22	2688116	2688787	R	24300930	-	RHE_RS13180	WP_011425829.1	223	COG0745	TK	DNA-binding response regulator	2542		RHE_RS18675	13	3867175	3868386	R	24298055	-	RHE_RS18675	WP_042119032.1	403	COG1566	V	HlyD family secretion protein	3596
RHE_RS27810	R	RHE_RS32435_m3	R	-96	-77	GCGCCGGTCTCGACCCACGT	10.4	3.0e-06	-12717	5523		RHE_RS01480	RHE_RS05790								RHE_RS08350	22	1716074	1716445	D	24298451	-	RHE_RS08350	WP_003547430.1	123	COG0784	T	MULTISPECIES: response regulator	1610		RHE_RS18665	13	3864321	3865343	R	24297548	-	RHE_RS18665	WP_011426863.1	340	COG1879	G	LacI family DNA-binding transcriptional regulator	3594
RHE_RS32435	D	RHE_RS32435_m3	D	-175	-156	GGGCCAATGTAGCCTCACCC	16.7	2.9e-09	-19659	8538		RHE_RS01540	RHE_RS05815								RHE_RS29975	21	125893	126582	D	24297251	-	RHE_RS29975	WP_004673291.1	229	COG1802	K	MULTISPECIES: GntR family transcriptional regulator	5771		RHE_RS14820	13	3032279	3033163	D	24300078	-	RHE_RS14820	WP_011426143.1	294	COG2971	G	N-acetylglucosamine kinase	2852
RHE_RS32675	R	RHE_RS32435_m3	R	-133	-114	GGGCCACGCGGACCTCACCC	9.4	6.1e-06	-12007	5215		RHE_RS01545	RHE_RS05855								RHE_RS29775	21	76014	76511	R	24297264	-	RHE_RS29775	WP_029875506.1	165			MULTISPECIES: XRE family transcriptional regulator	5733		RHE_RS13980	13	2844079	2845179	D	24301517	-	RHE_RS13980	WP_011425978.1	366	COG0115	EH	branched-chain amino acid aminotransferase	2689
RHE_RS30745	R	RHE_RS32435_m3	R	-93	-74	CTACCAGTCTATACCCACGG	12.2	7.1e-07	-14158	6149		RHE_RS01550	RHE_RS05915								RHE_RS29335	21	622446	622661	R	24302776	-	RHE_RS29335	WP_011428858.1	71	COG3905	K	CopG family transcriptional regulator	5647		RHE_RS13975	13	2842478	2843698	R	24301577	-	RHE_RS13975	WP_011425977.1	406	COG1167	KE	PLP-dependent aminotransferase family protein	2688
RHE_RS07690	D	RHE_RS32435_m4	D	-102	-89	CGATGTGCCGGGAG	8.9	9.0e-06	-11618	5046		RHE_RS01630	RHE_RS05945								RHE_RS27930	21	321663	322691	R	24303057	-	RHE_RS27930	WP_041679322.1	342	COG4977	K	AraC family transcriptional regulator	5374		RHE_RS13740	13	2798019	2798243	D	24300621	-	RHE_RS13740	WP_020921685.1	74			MULTISPECIES: hypothetical protein	2643
RHE_RS08525	D	RHE_RS32435_m4	D	-211	-198	GCATGAGACGGGTA	9.9	4.6e-06	-12289	5337		RHE_RS01660	RHE_RS06015								RHE_RS25970	21	412994	413578	R	24302369	-	RHE_RS25970	WP_011428225.1	194	COG0662	G	XRE family transcriptional regulator	4985		RHE_RS07330	13	1506873	1508369	R	24298409	-	RHE_RS07330	WP_011424771.1	498	COG0305	L	MULTISPECIES: replicative DNA helicase	1415
RHE_RS20380	R	RHE_RS32435_m4	R	-137	-124	GGATGCGCCGGGTT	8.9	9.0e-06	-11618	5046		RHE_RS01700	RHE_RS06105								RHE_RS24620	21	135424	136116	D	24302639	-	RHE_RS24620	WP_041679057.1	230	COG1802	K	GntR family transcriptional regulator	4723		RHE_RS06960	13	1427385	1427891	D	24300322	-	RHE_RS06960	WP_011424699.1	168	COG0110	R	N-acetyltransferase	1340
RHE_RS32435	D	RHE_RS32435_m5	D	-227	-214	CGATAAGTTGCCCA	16.9	3.4e-09	-19499	8469		RHE_RS01720	RHE_RS06135								RHE_RS23665	21	174813	175247	R	24302116	-	RHE_RS23665	WP_041678964.1	144	COG1846	K	MarR family transcriptional regulator	4534		RHE_RS05950	13	1214278	1216068	D	24300629	-	RHE_RS05950	WP_011424500.1	596	COG0840	NT	PAS domain S-box protein	1138
RHE_RS23965	D	RHE_RS32370_m1	D	-287	-275	TTACATGCGTAAA	8.3	9.4e-06	-11575	5027		RHE_RS01735	RHE_RS06175								RHE_RS19030	21	3945009	3945968	D	24300473	-	RHE_RS19030	WP_011426931.1	319	COG3284	K	sigma-54-dependent Fis family transcriptional regulator	3666		RHE_RS05945	13	1213098	1213820	R	24301194	-	RHE_RS05945	WP_011424499.1	240	COG2197	TK	LuxR family transcriptional regulator	1137
RHE_RS11060	R	RHE_RS32370_m2	R	-359	-342	CTTCGTTGCATGTCCTTT	9.5	5.7e-06	-12075	5244		RHE_RS01740	RHE_RS06215								RHE_RS18760	21	3884712	3885695	D	24300223	-	RHE_RS18760	WP_011426881.1	327	COG2390	K	sugar-binding transcriptional regulator	3613		RHE_RS01720	13	350268	350945	R	24299399	-	RHE_RS01720	WP_011423724.1	225	COG2186	K	FadR family transcriptional regulator	325
RHE_RS21975	R	RHE_RS32370_m2	R	-29	-12	CGTCGTTTGTGGTCGGCG	11.4	1.3e-06	-13553	5886		RHE_RS01815	RHE_RS06405								RHE_RS18665	21	3864321	3865343	R	24297548	-	RHE_RS18665	WP_011426863.1	340	COG1879	G	LacI family DNA-binding transcriptional regulator	3594		RHE_RS01700	13	342786	346343	R	24299619	-	RHE_RS01700	WP_011423720.1	1185			hypothetical protein	321
RHE_RS24110	R	RHE_RS32370_m2	R	-192	-175	GCTCGACCCCGGTCGGTG	9.7	4.9e-06	-12226	5310		RHE_RS01845	RHE_RS06465								RHE_RS18520	21	3832841	3833863	R	24298402	-	RHE_RS18520	WP_020922290.1	340	COG1609	K	MULTISPECIES: LacI family transcriptional regulator	3566		RHE_RS29450	12	6041	7045	D	24297417	-	RHE_RS29450	WP_011053285.1	334	COG0464	MDT	MULTISPECIES: ATP-binding protein	5672
RHE_RS32370	R	RHE_RS32370_m2	R	-57	-40	TGTCGTTGCTGGTCGGTG	18.5	4.2e-11	-23893	10377		RHE_RS01855	RHE_RS06535								RHE_RS14160	21	2883507	2883923	R	24300946	-	RHE_RS14160	WP_011426013.1	138	COG1733	K	transcriptional regulator	2724		RHE_RS28555	12	461297	461926	D	24302932	-	RHE_RS28555	WP_011428713.1	209	COG1309	K	TetR/AcrR family transcriptional regulator	5497
RHE_RS16700	R	RHE_RS32370_m3	R	-74	-62	TAAACTTGATTTT	9.7	6.9e-06	-11884	5161		RHE_RS01870	RHE_RS06555								RHE_RS13770	21	2802321	2803223	R	24297597	-	RHE_RS13770	WP_011425940.1	300	COG0583	K	LysR family transcriptional regulator	2650		RHE_RS28550	12	459114	461150	R	24302933	-	RHE_RS28550	WP_011428712.1	678	COG0446	I	FAD-binding protein	5496
RHE_RS18990	R	RHE_RS32370_m3	R	-16	-4	GAAACTCCACTAC	9.9	5.7e-06	-12075	5244		RHE_RS01925	RHE_RS06580								RHE_RS12460	21	2549252	2549740	R	24300353	-	RHE_RS12460	WP_011425694.1	162	COG1522	K	Lrp/AsnC family transcriptional regulator	2405		RHE_RS27525	12	222246	223259	D	24303138	-	RHE_RS27525	WP_011428519.1	337	COG1609	K	LacI family DNA-binding transcriptional regulator	5294
RHE_RS19375	D	RHE_RS32370_m4	D	-34	-16	GTCGCCACTCTTCCGTCGA	10.9	2.4e-06	-12940	5620		RHE_RS01980	RHE_RS06620								RHE_RS09130	21	1874391	1875395	R	24297582	-	RHE_RS09130	WP_011425078.1	334	COG1609	K	LacI family DNA-binding transcriptional regulator	1759		RHE_RS27520	12	220709	221974	R	24303139	-	RHE_RS27520	WP_011428518.1	421	COG1653	G	autotransporter outer membrane beta-barrel domain-containing protein	5293
RHE_RS30785	D	RHE_RS32370_m4	D	-37	-19	ATCGCCTGGCCTTAGTCGA	9.6	7.3e-06	-11828	5137		RHE_RS02015	RHE_RS06705								RHE_RS03610	21	738061	739470	D	24301590	-	RHE_RS03610	WP_011424076.1	469	COG1396	K	XRE family transcriptional regulator	692		RHE_RS26015	12	418354	418980	R	24302360	-	RHE_RS26015	WP_011428233.1	208	COG1309	K	TetR/AcrR family transcriptional regulator	4993
RHE_RS03380	R	RHE_RS31500_m2	R	-209	-192	CAGAAGGAGCCCCTTTTT	10.6	3.2e-06	-12652	5495		RHE_RS02045	RHE_RS06825								RHE_RS00725	21	150848	151213	D	24301150	-	RHE_RS00725	WP_011423536.1	121	COG1476	K	XRE family transcriptional regulator	135		RHE_RS25545	12	326105	328201	D	24302454	-	RHE_RS25545	WP_011428145.1	698	COG1028	IQR	bifunctional rhamnulose-1-phosphate aldolase/short-chain dehydrogenase	4900
RHE_RS31500	R	RHE_RS31500_m2	R	-32	-15	CAAAAGAGGTGCCTTCAC	11.5	9.6e-07	-13856	6018		RHE_RS02055	RHE_RS06845								RHE_RS24540	20	117367	118077	D	24302655	-	RHE_RS24540	WP_029531946.1	236	COG1802	K	MULTISPECIES: GntR family transcriptional regulator	4708		RHE_RS24480	12	101481	102947	D	24302667	-	RHE_RS24480	WP_011427947.1	488	COG1486	G	alpha-glucosidase/alpha-galactosidase	4696
RHE_RS31500	R	RHE_RS31500_m3	R	-57	-28	TTCACGCAATCTCAGTCGAAGTCTGCGCAG	9.6	3.6e-06	-12535	5444		RHE_RS02060	RHE_RS06875								RHE_RS23555	20	152562	153632	D	24302138	-	RHE_RS23555	WP_042119751.1	356	COG1609	K	LacI family DNA-binding transcriptional regulator	4511		RHE_RS24475	12	100394	101236	R	24302668	-	RHE_RS24475	WP_011427946.1	280	COG2207	K	AraC family transcriptional regulator	4695
RHE_RS31500	R	RHE_RS31500_m3	R	-36	-7	AGCACTTTCAAAAGAGGTGCCTTCACGCAA	15.4	2.3e-08	-17588	7638		RHE_RS02075	RHE_RS06955								RHE_RS23465	20	129207	130079	D	24302156	-	RHE_RS23465	WP_041678978.1	290	COG0583	K	LysR family transcriptional regulator	4493		RHE_RS20140	12	4165701	4166408	D	24301379	-	RHE_RS20140	WP_011427129.1	235	COG4181	Q	ABC transporter ATP-binding protein	3879
RHE_RS15755	D	RHE_RS31500_m3	D	-154	-125	TGCACAAGCCCCCACTCAACCGAGGCGCGC	8.4	8.2e-06	-11711	5086		RHE_RS02080	RHE_RS07105								RHE_RS20595	20	4266876	4267403	D	24297880	-	RHE_RS20595	WP_020922561.1	175	COG1846	K	MarR family transcriptional regulator	3972		RHE_RS19905	12	4124719	4125681	R	24299581	-	RHE_RS19905	WP_004679265.1	320	COG0039	C	MULTISPECIES: malate dehydrogenase	3832
RHE_RS31500	R	RHE_RS31500_m4	R	-23	-7	AGCACTTTCAAAAGAGG	17.7	1.9e-09	-20081	8721		RHE_RS02115	RHE_RS07210								RHE_RS18865	20	3908795	3909403	R	24297634	-	RHE_RS18865	WP_011426901.1	202	COG1309	K	TetR/AcrR family transcriptional regulator	3634		RHE_RS18900	12	3915607	3916362	D	24298669	-	RHE_RS18900	WP_041678762.1	251	COG2186	K	FadR family transcriptional regulator	3641
RHE_RS07835	R	RHE_RS31500_m4	R	-202	-186	CGCGCTTTGGAAACAGC	8.2	8.6e-06	-11664	5066		RHE_RS02120	RHE_RS07315								RHE_RS18560	20	3841280	3842173	D	24298320	-	RHE_RS18560	WP_020922298.1	297	COG0583	K	LysR family transcriptional regulator	3574		RHE_RS18895	12	3914416	3915399	R	24298670	-	RHE_RS18895	WP_011426907.1	327	COG1879	G	arabinose ABC transporter substrate-binding protein	3640
RHE_RS19190	R	RHE_RS31500_m4	R	-195	-179	CTCTCGTTTAAAAGAGC	10.7	1.4e-06	-13479	5854		RHE_RS02165	RHE_RS07480								RHE_RS18270	20	3770009	3770371	D	24298694	-	RHE_RS18270	WP_003542883.1	120	COG2204	T	MULTISPECIES: response regulator	3516		RHE_RS18560	12	3841280	3842173	D	24298320	-	RHE_RS18560	WP_020922298.1	297	COG0583	K	LysR family transcriptional regulator	3574
RHE_RS15185	D	RHE_RS31500_m5	D	-186	-174	TGGCGCATCACCT	10.8	6.6e-07	-14231	6180		RHE_RS02235	RHE_RS07685								RHE_RS15405	20	3152452	3152943	R	24300518	-	RHE_RS15405	WP_020921896.1	163	COG1846	K	MarR family transcriptional regulator	2965		RHE_RS15090	12	3077615	3079672	R	24299446	-	RHE_RS15090	WP_011426193.1	685	COG0568	K	MULTISPECIES: RNA polymerase sigma factor RpoD	2905
RHE_RS20585	R	RHE_RS31500_m5	R	-91	-79	TCGCGCTGCACAT	9.5	9.0e-06	-11618	5046		RHE_RS02310	RHE_RS07830								RHE_RS15090	20	3077615	3079672	R	24299446	-	RHE_RS15090	WP_011426193.1	685	COG0568	K	MULTISPECIES: RNA polymerase sigma factor RpoD	2905		RHE_RS14175	12	2886372	2887064	D	24297801	-	RHE_RS14175	WP_011426016.1	230	COG0789	K	MerR family DNA-binding transcriptional regulator	2727
RHE_RS07645	D	RHE_RS30790_m1	D	-68	-56	CTTCATCCACAGC	11.7	8.0e-07	-14039	6097		RHE_RS02315	RHE_RS07835								RHE_RS14355	20	2922699	2923601	D	24301520	-	RHE_RS14355	WP_011426052.1	300	COG0583	K	LysR family transcriptional regulator	2761		RHE_RS13410	12	2732280	2733203	R	24299880	-	RHE_RS13410	WP_011425869.1	307	COG4286	S	metal-dependent hydrolase	2582
RHE_RS30790	D	RHE_RS30790_m2	D	-125	-99	GCTGGAACATCGATACTTTCTCAATTT	17.0	1.2e-09	-20541	8921		RHE_RS02320	RHE_RS07925								RHE_RS11340	20	2321563	2321949	R	24299669	-	RHE_RS11340	WP_029531229.1	128	COG0789	K	MULTISPECIES: MerR family DNA-binding transcriptional regulator	2191		RHE_RS11060	12	2267907	2269013	R	24300432	-	RHE_RS11060	WP_011425427.1	368	COG0797	M	septal ring lytic transglycosylase RlpA family protein	2137
RHE_RS00340	D	RHE_RS30790_m3	D	-206	-196	TACAACCGACA	11.8	3.8e-07	-14783	6420		RHE_RS02340	RHE_RS08025								RHE_RS02855	20	585662	586219	D	24301089	-	RHE_RS02855	WP_020920333.1	185	COG1309	K	TetR family transcriptional regulator	544		RHE_RS10515	12	2145314	2146567	D	24301072	-	RHE_RS10515	WP_086005029.1	417	COG1653	G	ABC transporter substrate-binding protein	2028
RHE_RS04720	D	RHE_RS30790_m4	D	-19	-6	TCAAAAGGATTGTT	11.7	1.4e-06	-13479	5854		RHE_RS02355	RHE_RS08350								RHE_RS32675	19	251180	251686	R	30584687	-	RHE_RS32675	WP_004671987.1	168	COG1396	K	MULTISPECIES: XRE family transcriptional regulator	5881		RHE_RS10510	12	2143863	2145062	R	24301073	-	RHE_RS10510	WP_011425320.1	399	COG1846	K	ROK family transcriptional regulator	2027
RHE_RS13025	R	RHE_RS30790_m4	R	-212	-199	CGAAAAGGATTGGT	11.6	1.4e-06	-13479	5854		RHE_RS02365	RHE_RS08760								RHE_RS27645	19	250775	251488	D	24303114	-	RHE_RS27645	WP_011428542.1	237	COG2186	K	FadR family transcriptional regulator	5316		RHE_RS09995	12	2042437	2043873	D	24301233	cobA	RHE_RS09995	WP_011425233.1	478	COG0007	H	uroporphyrinogen-III C-methyltransferase	1924
RHE_RS30975	R	RHE_RS30790_m4	R	-113	-100	TGAAATCATTTGTT	9.9	4.8e-06	-12247	5319		RHE_RS02560	RHE_RS08785								RHE_RS27415	19	199438	199935	D	24303160	-	RHE_RS27415	WP_011428497.1	165	COG1522	K	Lrp/AsnC family transcriptional regulator	5272		RHE_RS08965	12	1835177	1838992	R	24300152	-	RHE_RS08965	WP_011425046.1	1271	COG0209	F	vitamin B12-dependent ribonucleotide reductase	1727
RHE_RS30790	D	RHE_RS30790_m5	D	-120	-109	AACATCGATACT	12.9	1.5e-07	-15713	6824		RHE_RS02600	RHE_RS08920								RHE_RS26695	19	57722	58231	R	24303304	-	RHE_RS26695	WP_086005055.1	169	COG1595	K	RNA polymerase subunit sigma-70	5129		RHE_RS08785	12	1799309	1800364	D	24301455	-	RHE_RS08785	WP_011425012.1	351	COG1609	K	LacI family DNA-binding transcriptional regulator	1692
RHE_RS15775	R	RHE_RS30745_m1	R	-237	-223	AGACTGGGAGTCTAA	9.5	9.7e-06	-11543	5013		RHE_RS02610	RHE_RS08925								RHE_RS26015	19	418354	418980	R	24302360	-	RHE_RS26015	WP_011428233.1	208	COG1309	K	TetR/AcrR family transcriptional regulator	4993		RHE_RS06015	12	1225501	1225983	R	24300982	-	RHE_RS06015	WP_011424512.1	160	COG1846	K	MarR family transcriptional regulator	1151
RHE_RS30745	R	RHE_RS30745_m1	R	-168	-154	CGATTTATCGTCCCG	11.3	1.9e-06	-13174	5721		RHE_RS02615	RHE_RS09015								RHE_RS25060	19	234917	235675	R	24302551	-	RHE_RS25060	WP_011428054.1	252	COG1414	K	IclR family transcriptional regulator	4808		RHE_RS05730	12	1171858	1172895	D	24299250	-	RHE_RS05730	WP_011424462.1	345	COG1609	K	LacI family DNA-binding transcriptional regulator	1098
RHE_RS30745	R	RHE_RS30745_m1	R	-85	-71	GGACTACCAGTCTAT	14.0	5.4e-08	-16734	7268		RHE_RS02620	RHE_RS09025								RHE_RS24735	19	166543	166890	D	24302616	-	RHE_RS24735	WP_011427995.1	115	COG0640	K	ArsR family transcriptional regulator	4747		RHE_RS04720	12	987259	987519	D	24298865	-	RHE_RS04720	WP_011424283.1	86			DUF1344 domain-containing protein	905
RHE_RS30830	D	RHE_RS30745_m1	D	-158	-144	CAACTTCCAGTCTGG	9.6	9.0e-06	-11618	5046		RHE_RS02635	RHE_RS09045								RHE_RS23520	19	142893	143678	R	24302145	-	RHE_RS23520	WP_011427760.1	261			XRE family transcriptional regulator	4504		RHE_RS00415	12	88137	88814	R	24298097	-	RHE_RS00415	WP_011423478.1	225	COG1309	K	TetR/AcrR family transcriptional regulator	74
RHE_RS06955	R	RHE_RS30745_m2	R	-357	-337	TGCTGGTACAGGGCATACACC	5.8	7.4e-06	-11814	5131		RHE_RS02675	RHE_RS09080								RHE_RS23080	19	44447	44824	R	24302233	-	RHE_RS23080	WP_042119708.1	125	COG1733	K	transcriptional regulator	4419		RHE_RS32675	11	251180	251686	R	30584687	-	RHE_RS32675	WP_004671987.1	168	COG1396	K	MULTISPECIES: XRE family transcriptional regulator	5881
RHE_RS06960	D	RHE_RS30745_m2	D	-223	-203	TGCTGGTACAGGGCATACACC	5.8	7.4e-06	-11814	5131		RHE_RS02695	RHE_RS09130								RHE_RS19745	19	4091498	4092391	R	24301476	-	RHE_RS19745	WP_011427055.1	297	COG0583	K	MULTISPECIES: LysR family transcriptional regulator	3800		RHE_RS30890	11	311164	312786	R	24297458	ccoN	RHE_RS30890	WP_004674403.1	540	COG3278	C	MULTISPECIES: cytochrome-c oxidase, cbb3-type subunit I	5939
RHE_RS30745	R	RHE_RS30745_m2	R	-63	-43	TGCTGGAACAGCACGAATAGC	24.9	5.5e-14	-30531	13260		RHE_RS02710	RHE_RS09445								RHE_RS18900	19	3915607	3916362	D	24298669	-	RHE_RS18900	WP_041678762.1	251	COG2186	K	FadR family transcriptional regulator	3641		RHE_RS30310	11	197765	198676	D	24297450	-	RHE_RS30310	WP_042120104.1	303	COG0583	K	MULTISPECIES: LysR family transcriptional regulator	5834
RHE_RS02695	D	RHE_RS30745_m3	D	-112	-98	TGAGAGGCCTTGGAG	15.8	2.1e-08	-17679	7678		RHE_RS02715	RHE_RS10220								RHE_RS16800	19	3447193	3448194	R	24299517	-	RHE_RS16800	WP_042118941.1	333	COG4977	K	transcriptional regulator FtrA	3232		RHE_RS28710	11	491401	491865	D	24302901	-	RHE_RS28710	WP_011428743.1	154	COG1522	K	Lrp/AsnC family transcriptional regulator	5526
RHE_RS11945	R	RHE_RS30745_m3	R	-206	-192	AAAGAAGATTTGGAG	9.3	4.4e-06	-12334	5357		RHE_RS02750	RHE_RS10425								RHE_RS13965	19	2840517	2840987	D	24301603	-	RHE_RS13965	WP_011425975.1	156	COG1846	K	MarR family transcriptional regulator	2686		RHE_RS25905	11	398760	399902	R	24302382	-	RHE_RS25905	WP_011428215.1	380	COG2207	K	AraC family transcriptional regulator	4972
RHE_RS22845	D	RHE_RS30745_m3	D	-64	-50	CAAGAGTCTTTGGCA	8.2	8.2e-06	-11711	5086		RHE_RS02765	RHE_RS10445								RHE_RS13295	19	2706372	2707193	R	24300892	-	RHE_RS13295	WP_011425847.1	273	COG2207	K	AraC family transcriptional regulator	2561		RHE_RS25540	11	325094	325906	R	24302455	-	RHE_RS25540	WP_011428144.1	270	COG1349	KG	MULTISPECIES: DeoR/GlpR transcriptional regulator	4899
RHE_RS25150	R	RHE_RS30745_m3	R	-233	-219	GAAGAGGATGTGGAA	8.1	8.7e-06	-11652	5060		RHE_RS02770	RHE_RS10485								RHE_RS12990	19	2651656	2652150	D	24298699	-	RHE_RS12990	WP_011425794.1	164	COG1846	K	MarR family transcriptional regulator	2505		RHE_RS25065	11	235823	236530	D	24302550	-	RHE_RS25065	WP_011428055.1	235	COG1788	I	3-oxoacid CoA-transferase subunit A	4809
RHE_RS30745	R	RHE_RS30745_m3	R	-19	-5	TAAGAGGCCTTGGAG	18.6	1.2e-09	-20541	8921		RHE_RS02780	RHE_RS10510								RHE_RS12585	19	2575379	2576422	D	24299650	-	RHE_RS12585	WP_020921520.1	347	COG1609	K	MULTISPECIES: LacI family DNA-binding transcriptional regulator	2429		RHE_RS25060	11	234917	235675	R	24302551	-	RHE_RS25060	WP_011428054.1	252	COG1414	K	IclR family transcriptional regulator	4808
RHE_RS04090	R	RHE_RS30745_m4	R	-104	-78	AGAAAAGGCGCCTCGAACTGCGCCTTT	6.6	7.6e-06	-11787	5119		RHE_RS02810	RHE_RS10545								RHE_RS10920	19	2234074	2234595	R	24301414	-	RHE_RS10920	WP_011425400.1	173	COG1846	K	transcriptional regulator	2110		RHE_RS23965	11	235824	236804	D	24302056	-	RHE_RS23965	WP_011427845.1	326	COG0524	G	sugar kinase	4594
RHE_RS07480	R	RHE_RS30745_m4	R	-126	-100	AAAAAATCCTCCGCGCGAGACGCCGTT	9.7	1.2e-06	-13633	5921		RHE_RS02835	RHE_RS10580								RHE_RS10890	19	2228912	2229652	D	24299303	-	RHE_RS10890	WP_042118472.1	246	COG0745	TK	DNA-binding response regulator	2104		RHE_RS23695	11	181680	182465	R	24302110	-	RHE_RS23695	WP_042119787.1	261	COG1414	K	IclR family transcriptional regulator	4540
RHE_RS14275	D	RHE_RS30745_m4	D	-100	-74	AAAAAACTGCCCCGTGCCTGCACCGCC	10.4	7.3e-07	-14130	6137		RHE_RS02850	RHE_RS10640								RHE_RS09045	19	1856155	1856616	R	24301418	-	RHE_RS09045	WP_011425061.1	153	COG1522	K	Lrp/AsnC family transcriptional regulator	1742		RHE_RS20585	11	4263295	4264839	R	24299231	-	RHE_RS20585	WP_042119108.1	514	COG4784	R	metalloprotease	3970
RHE_RS15090	R	RHE_RS30745_m5	R	-300	-287	GCCCGCGAAAACTC	10.0	6.4e-06	-11959	5194		RHE_RS02855	RHE_RS10890								RHE_RS05815	19	1190760	1191380	R	24297599	-	RHE_RS05815	WP_011424479.1	206	COG1309	K	transcriptional regulator BetI	1115		RHE_RS17915	11	3693161	3693676	D	24297654	-	RHE_RS17915	WP_004679442.1	171	COG5317	S	MULTISPECIES: DUF1465 domain-containing protein	3445
RHE_RS16755	R	RHE_RS30745_m5	R	-209	-196	GGCAGCGTTAACTG	9.7	8.3e-06	-11699	5081		RHE_RS02910	RHE_RS10920								RHE_RS04575	19	957245	957694	D	24298570	-	RHE_RS04575	WP_011424256.1	149	COG1733	K	transcriptional regulator	877		RHE_RS16100	11	3296911	3300312	R	24299341	-	RHE_RS16100	WP_011426382.1	1133	COG0784	T	hybrid sensor histidine kinase/response regulator	3097
RHE_RS16760	D	RHE_RS30745_m5	D	-56	-43	GGCAGCGTTAACTG	9.7	8.3e-06	-11699	5081		RHE_RS02955	RHE_RS10960								RHE_RS04065	19	845367	846263	R	24300488	-	RHE_RS04065	WP_011424157.1	298	COG0583	K	LysR family transcriptional regulator	776		RHE_RS15755	11	3225725	3226450	D	24300784	-	RHE_RS15755	WP_011426316.1	241	COG2197	TK	LuxR family transcriptional regulator	3030
RHE_RS11615	D	RHE_RS30570_m1	D	-101	-90	CCTGAAGCAATT	12.5	3.8e-07	-14783	6420		RHE_RS03000	RHE_RS11075								RHE_RS04025	19	837503	838144	D	24300269	-	RHE_RS04025	WP_011424149.1	213	COG1309	K	TetR/AcrR family transcriptional regulator	768		RHE_RS14830	11	3034038	3037811	R	24300465	-	RHE_RS14830	WP_042118777.1	1257	COG0646	E	methionine synthase	2854
RHE_RS21085	R	RHE_RS30570_m1	R	-181	-170	AATGAAGCAAAT	10.6	5.4e-06	-12129	5268		RHE_RS03025	RHE_RS11340								RHE_RS01480	19	299944	300798	D	24301029	-	RHE_RS01480	WP_011423676.1	284	COG2207	K	AraC family transcriptional regulator	280		RHE_RS10920	11	2234074	2234595	R	24301414	-	RHE_RS10920	WP_011425400.1	173	COG1846	K	transcriptional regulator	2110
RHE_RS21040	R	RHE_RS30570_m2	R	-99	-82	GGCGAAATCGCTTCAGCG	8.6	9.5e-06	-11564	5022		RHE_RS03030	RHE_RS11690								RHE_RS00340	19	70995	71777	D	24301178	-	RHE_RS00340	WP_011423463.1	260	COG2197	TK	DNA-binding response regulator	59		RHE_RS09990	11	2041582	2042169	R	24301234	-	RHE_RS09990	WP_011425232.1	195	COG0590	J	nucleoside deaminase	1923
RHE_RS30570	R	RHE_RS30570_m2	R	-161	-144	AGCCAAATTGCTTCATGA	15.8	1.0e-08	-18421	8000		RHE_RS03040	RHE_RS11740								RHE_RS00285	19	56550	57128	R	24299273	-	RHE_RS00285	WP_011423459.1	192	COG4567	TK	MULTISPECIES: DNA-binding response regulator	55		RHE_RS09130	11	1874391	1875395	R	24297582	-	RHE_RS09130	WP_011425078.1	334	COG1609	K	LacI family DNA-binding transcriptional regulator	1759
RHE_RS08995	D	RHE_RS30570_m3	D	-149	-135	AGTTAAAATCAGTTC	9.8	7.7e-06	-11774	5114		RHE_RS03085	RHE_RS11860								RHE_RS30310	18	197765	198676	D	24297450	-	RHE_RS30310	WP_042120104.1	303	COG0583	K	MULTISPECIES: LysR family transcriptional regulator	5834		RHE_RS06050	11	1231640	1233235	R	24300140	-	RHE_RS06050	WP_011424519.1	531	COG0488	R	ABC transporter ATP-binding protein	1158
RHE_RS11945	R	RHE_RS30570_m3	R	-32	-18	TCTTCAAATGGGTGG	10.5	4.2e-06	-12380	5377		RHE_RS03175	RHE_RS12035								RHE_RS28695	18	487756	488760	R	24302904	-	RHE_RS28695	WP_011428740.1	334	COG2207	K	AraC family transcriptional regulator	5523		RHE_RS05725	11	1169820	1171322	R	24299251	-	RHE_RS05725	WP_011424461.1	500	COG0265	O	DegQ family serine endoprotease	1097
RHE_RS30570	R	RHE_RS30570_m3	R	-179	-165	CATTCAAAACAGTCT	12.3	6.5e-07	-14246	6187		RHE_RS03180	RHE_RS12060								RHE_RS28045	18	350037	350705	R	24303034	-	RHE_RS28045	WP_011428618.1	222	COG0745	TK	DNA-binding response regulator	5396		RHE_RS04020	11	836669	837085	D	24300270	-	RHE_RS04020	WP_011424148.1	138	COG5331	S	membrane protein	767
RHE_RS02075	R	RHE_RS30570_m4	R	-62	-48	GAACGAATTTGGCGA	8.7	4.7e-06	-12268	5328		RHE_RS03195	RHE_RS12205								RHE_RS27920	18	319840	320472	D	24303059	-	RHE_RS27920	WP_011428594.1	210	COG1309	K	TetR/AcrR family transcriptional regulator	5372		RHE_RS02165	11	442766	443131	D	24300565	-	RHE_RS02165	WP_042117808.1	121	COG0640	K	ArsR family transcriptional regulator	414
RHE_RS02080	D	RHE_RS30570_m4	D	-155	-141	GAACGAATTTGGCGA	8.7	4.7e-06	-12268	5328		RHE_RS03205	RHE_RS12325								RHE_RS27525	18	222246	223259	D	24303138	-	RHE_RS27525	WP_011428519.1	337	COG1609	K	LacI family DNA-binding transcriptional regulator	5294		RHE_RS02080	11	426516	428012	D	24300971	-	RHE_RS02080	WP_042119151.1	498	COG0840	NT	globin-coupled sensor protein	397
RHE_RS32675	R	RHE_RS30570_m4	R	-238	-224	GCGCCAAATTGGCTA	9.0	3.8e-06	-12481	5420		RHE_RS03210	RHE_RS12415								RHE_RS22605	18	130935	132008	D	24301921	-	RHE_RS22605	WP_011427582.1	357	COG1609	K	LacI family transcriptional regulator	4326		RHE_RS02075	11	425097	426317	R	24301276	-	RHE_RS02075	WP_042117797.1	406	COG1322	L	DNA recombination protein RmuC	396
RHE_RS04885	D	RHE_RS30570_m5	D	-127	-105	CCAATGTCACCAATCAATCAACT	9.4	4.1e-06	-12405	5387		RHE_RS03275	RHE_RS12460								RHE_RS20490	18	4243847	4244623	D	24300911	-	RHE_RS20490	WP_020922551.1	258	COG1349	KG	DeoR/GlpR transcriptional regulator	3950		RHE_RS01020	11	214409	214819	R	24300205	-	RHE_RS01020	WP_042117718.1	136	COG4964	UW	membrane protein	192
RHE_RS28450	R	RHE_RS30570_m5	R	-102	-80	GCAATCTGGGGAAACTCTCACAT	8.9	5.4e-06	-12129	5268		RHE_RS03290	RHE_RS12520								RHE_RS19750	18	4092469	4092810	R	24297970	-	RHE_RS19750	WP_011427056.1	113	COG0640	K	ArsR family transcriptional regulator	3801		RHE_RS00765	11	163227	163643	R	24301033	-	RHE_RS00765	WP_011423544.1	138	COG1846	K	MULTISPECIES: MarR family transcriptional regulator	143
RHE_RS28455	D	RHE_RS30570_m5	D	-36	-14	GCAATCTGGGGAAACTCTCACAT	8.9	5.4e-06	-12129	5268		RHE_RS03315	RHE_RS12585								RHE_RS18710	18	3875348	3876256	D	24298177	-	RHE_RS18710	WP_011426872.1	302	COG0583	K	LysR family transcriptional regulator	3603		RHE_RS29945	10	115714	118227	D	24297319	-	RHE_RS29945	WP_011053352.1	837	COG0840	NT	methyl-accepting chemotaxis protein	5765
RHE_RS30570	R	RHE_RS30570_m5	R	-279	-257	CGAGTTTGAGCGAAAATTCACAT	11.6	8.1e-07	-14026	6092		RHE_RS03380	RHE_RS12620								RHE_RS16340	18	3352684	3353586	R	24301342	-	RHE_RS16340	WP_011426428.1	300	COG0583	K	LysR family transcriptional regulator	3143		RHE_RS29775	10	76014	76511	R	24297264	-	RHE_RS29775	WP_029875506.1	165			MULTISPECIES: XRE family transcriptional regulator	5733
RHE_RS09015	D	RHE_RS30470_m1	D	-81	-70	CGATCTGGATTA	10.6	5.8e-06	-12058	5237		RHE_RS03390	RHE_RS12670								RHE_RS16205	18	3324677	3325684	D	24299726	-	RHE_RS16205	WP_011426402.1	335	COG0583	K	LysR family transcriptional regulator	3118		RHE_RS28340	10	415548	416246	D	24302975	-	RHE_RS28340	WP_011428673.1	232	COG1802	K	GntR family transcriptional regulator	5454
RHE_RS11665	D	RHE_RS30470_m1	D	-28	-17	TCATCCGGATCA	11.0	3.8e-06	-12481	5420		RHE_RS03405	RHE_RS12775								RHE_RS14150	18	2881565	2882188	D	24298299	-	RHE_RS14150	WP_011426011.1	207	COG1309	K	TetR/AcrR family transcriptional regulator	2722		RHE_RS26210	10	461879	463186	R	24302321	glnT	RHE_RS26210	WP_011428271.1	435	COG0174	E	glutamine synthetase 3	5033
RHE_RS13580	D	RHE_RS30470_m1	D	-103	-92	TGATCTGGATGA	11.3	2.1e-06	-13074	5678		RHE_RS03430	RHE_RS12915								RHE_RS13750	18	2798801	2799247	R	24297755	-	RHE_RS13750	WP_041678693.1	148	COG3832	S	transcriptional regulator	2645		RHE_RS25370	10	290650	291675	R	24302489	-	RHE_RS25370	WP_011428113.1	341	COG1613	P	sulfate ABC transporter substrate-binding protein	4867
RHE_RS19745	R	RHE_RS30470_m1	R	-38	-27	TCATCCGGATCA	11.0	3.8e-06	-12481	5420		RHE_RS03450	RHE_RS12920								RHE_RS13235	18	2696663	2697040	R	24299127	-	RHE_RS13235	WP_011425837.1	125	COG1733	K	transcriptional regulator	2551		RHE_RS24090	10	18952	19392	D	24302745	-	RHE_RS24090	WP_011427872.1	146	COG3279	KT	response regulator	4617
RHE_RS30470	D	RHE_RS30470_m1	D	-143	-132	TGATCTGGATCA	12.1	3.3e-07	-14924	6481		RHE_RS03485	RHE_RS12940								RHE_RS12920	18	2636767	2638098	R	24298962	-	RHE_RS12920	WP_011425779.1	443	COG0745	TK	diguanylate cyclase response regulator	2492		RHE_RS23585	10	158086	159582	D	24302132	-	RHE_RS23585	WP_011427773.1	498	COG1129	G	sugar ABC transporter ATP-binding protein	4517
RHE_RS18935	D	RHE_RS30470_m2	D	-126	-106	TTCCCCCTTCTACCCAGCGGG	12.0	4.5e-07	-14614	6347		RHE_RS03490	RHE_RS12990								RHE_RS12670	18	2590396	2591115	D	24301393	-	RHE_RS12670	WP_011425734.1	239	COG0664	T	Crp/Fnr family transcriptional regulator	2445		RHE_RS23465	10	129207	130079	D	24302156	-	RHE_RS23465	WP_041678978.1	290	COG0583	K	LysR family transcriptional regulator	4493
RHE_RS20150	D	RHE_RS30470_m2	D	-122	-102	ACCCCTTGTTTGCCCCGCGCG	7.7	7.7e-06	-11774	5114		RHE_RS03500	RHE_RS13060								RHE_RS08025	18	1653220	1654098	R	24300585	-	RHE_RS08025	WP_042119226.1	292	COG0583	K	LysR family transcriptional regulator	1551		RHE_RS20460	10	4235959	4236714	D	24301195	-	RHE_RS20460	WP_011427189.1	251	COG2197	TK	LuxR family transcriptional regulator	3944
RHE_RS05450	R	RHE_RS30470_m3	R	-67	-42	GACGACTTCAGCGGTGCCGGCGTCAC	9.2	7.4e-06	-11814	5131		RHE_RS03505	RHE_RS13070								RHE_RS07830	18	1612598	1613140	D	24301051	-	RHE_RS07830	WP_011424865.1	180	COG0789	K	MULTISPECIES: MerR family transcriptional regulator	1516		RHE_RS20455	10	4233809	4235572	R	24301196	-	RHE_RS20455	WP_020922545.1	587	COG1132	V	beta-(1-->2)glucan export ATP-binding/permease NdvA	3943
RHE_RS18615	R	RHE_RS30470_m3	R	-111	-86	GCCGAAAACTGCAACGTTACAGTAGG	9.3	6.9e-06	-11884	5161		RHE_RS03515	RHE_RS13180								RHE_RS06215	18	1265346	1266380	D	24299033	-	RHE_RS06215	WP_042118128.1	344	COG1609	K	LacI family DNA-binding transcriptional regulator	1192		RHE_RS20295	10	4195199	4196002	R	24301003	-	RHE_RS20295	WP_011427161.1	267	COG0708	L	exodeoxyribonuclease III	3912
RHE_RS30470	D	RHE_RS30470_m3	D	-388	-363	CTCGAAGCGTGCTACTCCTTTGTCCT	16.3	3.8e-09	-19388	8420		RHE_RS03520	RHE_RS13190								RHE_RS05855	18	1198302	1199054	R	24300908	-	RHE_RS05855	WP_020920707.1	250	COG1349	KG	DeoR/GlpR transcriptional regulator	1122		RHE_RS19670	10	4069010	4070029	R	24300942	-	RHE_RS19670	WP_073990398.1	339	COG1609	K	LacI family transcriptional regulator	3786
RHE_RS30470	D	RHE_RS30470_m3	D	-344	-319	CCCGACGACACCACCCTAAGAGTCGG	16.0	6.5e-09	-18851	8187		RHE_RS03545	RHE_RS13215								RHE_RS05730	18	1171858	1172895	D	24299250	-	RHE_RS05730	WP_011424462.1	345	COG1609	K	LacI family DNA-binding transcriptional regulator	1098		RHE_RS18795	10	3890006	3890860	D	24300242	-	RHE_RS18795	WP_011426888.1	284	COG1737	K	MULTISPECIES: MurR/RpiR family transcriptional regulator	3620
RHE_RS30470	D	RHE_RS30470_m3	D	-88	-63	GAAGAAATAGGGATAGCCGAAGTCGC	14.1	1.1e-07	-16023	6959		RHE_RS03580	RHE_RS13235								RHE_RS04315	18	898509	899243	D	24297576	-	RHE_RS04315	WP_042117980.1	244	COG2197	TK	LuxR family transcriptional regulator	826		RHE_RS18650	10	3860249	3861280	D	24297893	-	RHE_RS18650	WP_011426860.1	343	COG1609	K	LacI family transcriptional regulator	3591
RHE_RS04510	R	RHE_RS30470_m5	R	-158	-137	CTGATGGTTATCAAAACCGAAT	7.6	2.4e-06	-12940	5620		RHE_RS03610	RHE_RS13295								RHE_RS02310	18	467262	467843	R	24300304	-	RHE_RS02310	WP_011423833.1	193	COG1309	K	TetR/AcrR family transcriptional regulator	439		RHE_RS15570	10	3185027	3186673	D	24301552	-	RHE_RS15570	WP_011426284.1	548	COG1283	P	Na/Pi cotransporter family protein	2997
RHE_RS30470	D	RHE_RS30470_m5	D	-112	-91	TTGATAGCCATCAAAGACGCGC	21.0	1.0e-10	-23026	10000		RHE_RS03615	RHE_RS13450								RHE_RS00765	18	163227	163643	R	24301033	-	RHE_RS00765	WP_011423544.1	138	COG1846	K	MULTISPECIES: MarR family transcriptional regulator	143		RHE_RS15375	10	3148058	3148273	D	24298301	-	RHE_RS15375	WP_003561293.1	71	COG1278	K	MULTISPECIES: cold-shock protein	2959
RHE_RS01815	D	RHE_RS30310_m1	D	-111	-101	TTTATAAGCTT	12.8	1.6e-07	-15648	6796		RHE_RS03620	RHE_RS13695								RHE_RS29195	17	594574	595299	D	24302804	-	RHE_RS29195	WP_011428833.1	241	COG0745	TK	DNA-binding response regulator	5619		RHE_RS15185	10	3108413	3108889	D	24299307	-	RHE_RS15185	WP_011426212.1	158	COG0782	K	transcription elongation factor GreA	2924
RHE_RS17170	R	RHE_RS30310_m1	R	-31	-21	TTTATAAGCAT	10.1	6.5e-06	-11944	5187		RHE_RS03635	RHE_RS13750								RHE_RS28305	17	405850	406326	R	24302982	-	RHE_RS28305	WP_004679019.1	158	COG1522	K	MULTISPECIES: Lrp/AsnC family transcriptional regulator	5447		RHE_RS15110	10	3084575	3086572	R	24301111	-	RHE_RS15110	WP_011426197.1	665	COG0358	L	DNA primase	2909
RHE_RS30310	D	RHE_RS30310_m1	D	-145	-135	TTTATTAGCTT	12.0	5.3e-07	-14450	6276		RHE_RS03640	RHE_RS13770								RHE_RS26290	17	479091	479495	D	24302305	-	RHE_RS26290	WP_011428287.1	134	COG1476	K	MULTISPECIES: XRE family transcriptional regulator	5049		RHE_RS14885	10	3047321	3047704	R	24301149	-	RHE_RS14885	WP_011426156.1	127			MULTISPECIES: hypothetical protein	2865
RHE_RS30310	D	RHE_RS30310_m1	D	-77	-67	TTTATAAGATT	11.6	8.8e-07	-13943	6056		RHE_RS03680	RHE_RS13800								RHE_RS25605	17	339943	340566	D	24302442	-	RHE_RS25605	WP_011428157.1	207	COG1309	K	TetR/AcrR family transcriptional regulator	4912		RHE_RS14770	10	3021343	3022215	D	24298970	-	RHE_RS14770	WP_020921822.1	290	COG1737	K	MurR/RpiR family transcriptional regulator	2842
RHE_RS23770	R	RHE_RS30310_m2	R	-95	-75	GCAATAAGCAACAGTTATGGA	11.4	1.0e-06	-13816	6000		RHE_RS03695	RHE_RS13965								RHE_RS23835	17	208706	209776	R	24302082	-	RHE_RS23835	WP_042119774.1	356	COG1609	K	LacI family transcriptional regulator	4568		RHE_RS14275	10	2903782	2905806	D	24297637	-	RHE_RS14275	WP_042118744.1	674	COG0433	L	DUF87 domain-containing protein	2746
RHE_RS23775	D	RHE_RS30310_m2	D	-161	-141	GCAATAAGCAACAGTTATGGA	11.4	1.0e-06	-13816	6000		RHE_RS03720	RHE_RS14055								RHE_RS23695	17	181680	182465	R	24302110	-	RHE_RS23695	WP_042119787.1	261	COG1414	K	IclR family transcriptional regulator	4540		RHE_RS13025	10	2656954	2658774	R	24301045	-	RHE_RS13025	WP_042118649.1	606	COG0840	NT	HAMP domain-containing protein	2511
RHE_RS26945	D	RHE_RS30310_m2	D	-112	-92	CCGATAAGCAGTACTTATCGG	15.0	4.1e-08	-17010	7387		RHE_RS03775	RHE_RS14100								RHE_RS22190	17	41536	42300	D	24302004	-	RHE_RS22190	WP_011427504.1	254	COG2186	K	MULTISPECIES: FadR family transcriptional regulator	4248		RHE_RS12925	10	2638285	2639115	R	24298961	-	RHE_RS12925	WP_041678678.1	276	COG3706	TK	chemotaxis protein CheY	2493
RHE_RS29450	D	RHE_RS30310_m2	D	-299	-279	CCGATAAGCATTACTTATCGG	13.5	1.8e-07	-15530	6745		RHE_RS03790	RHE_RS14115								RHE_RS21205	17	23982	25016	R	24301851	-	RHE_RS21205	WP_011427325.1	344	COG2390	K	MULTISPECIES: sugar-binding transcriptional regulator	4088		RHE_RS10795	10	2208863	2209378	D	24297588	-	RHE_RS10795	WP_011425374.1	171			single-stranded DNA-binding protein	2085
RHE_RS29840	D	RHE_RS30310_m2	D	-30	-10	TTCATTAGTGCTACGTAGGAC	9.1	5.4e-06	-12129	5268		RHE_RS03870	RHE_RS14135								RHE_RS20825	17	4317621	4317998	R	24299475	-	RHE_RS20825	WP_011427257.1	125	COG2005	K	LysR family transcriptional regulator	4017		RHE_RS09700	10	1981639	1982829	D	24298550	-	RHE_RS09700	WP_011425181.1	396	COG0626	E	cystathionine beta-lyase	1866
RHE_RS30310	D	RHE_RS30310_m2	D	-57	-37	TTGATAAGCGCAGCTTATGAG	17.6	1.4e-09	-20387	8854		RHE_RS03890	RHE_RS14150								RHE_RS20285	17	4193915	4194598	D	24300121	-	RHE_RS20285	WP_011427159.1	227	COG0745	TK	MULTISPECIES: DNA-binding response regulator	3910		RHE_RS09695	10	1980265	1981290	R	24298551	-	RHE_RS09695	WP_020921184.1	341	COG0834	ET	amino acid ABC transporter substrate-binding protein	1865
RHE_RS16565	D	RHE_RS30310_m3	D	-24	-6	ACTCTAATGATTTGAGGGA	5.9	7.7e-06	-11774	5114		RHE_RS03970	RHE_RS14160								RHE_RS20060	17	4151972	4152886	R	24300316	-	RHE_RS20060	WP_042119077.1	304	COG0583	K	LysR family transcriptional regulator	3863		RHE_RS06560	10	1329502	1330146	D	24301403	-	RHE_RS06560	WP_042118151.1	214	COG3179	R	chitinase	1260
RHE_RS17765	R	RHE_RS30310_m3	R	-110	-92	ATTCTTATGAAATGAAGCC	6.7	5.0e-06	-12206	5301		RHE_RS03980	RHE_RS14175								RHE_RS16825	17	3451545	3452195	R	24299420	-	RHE_RS16825	WP_011426523.1	216	COG1309	K	TetR family transcriptional regulator	3236		RHE_RS06405	10	1301853	1302284	D	24300714	-	RHE_RS06405	WP_011424588.1	143	COG4957	K	MULTISPECIES: transcriptional regulator	1230
RHE_RS17770	D	RHE_RS30310_m3	D	-155	-137	ATTCTTATGAAATGAAGCC	6.7	5.0e-06	-12206	5301		RHE_RS03995	RHE_RS14185								RHE_RS15210	17	3114974	3115441	R	24299723	-	RHE_RS15210	WP_020921868.1	155	COG1522	K	Lrp/AsnC family transcriptional regulator	2929		RHE_RS05780	10	1183811	1184764	R	24300615	-	RHE_RS05780	WP_011424472.1	317	COG0175	EH	MULTISPECIES: sulfate adenylyltransferase subunit 2	1108
RHE_RS10710	D	RHE_RS30310_m4	D	-108	-81	CGCTTTCCGTAACCGGCGGAAATTGAAA	2.2	1.8e-06	-13228	5745		RHE_RS04010	RHE_RS14210								RHE_RS13070	17	2666412	2666789	R	24297884	-	RHE_RS13070	WP_011425808.1	125	COG3279	KT	response regulator	2520		RHE_RS05255	10	1086690	1087337	R	24300250	-	RHE_RS05255	WP_011424377.1	215	COG1974	KT	transcriptional regulator	1010
RHE_RS22910	D	RHE_RS30310_m4	D	-65	-38	CACATTCCTTTAATCCAGTAATTTTATA	1.3	2.6e-06	-12860	5585		RHE_RS04015	RHE_RS14355								RHE_RS10510	17	2143863	2145062	R	24301073	-	RHE_RS10510	WP_011425320.1	399	COG1846	K	ROK family transcriptional regulator	2027		RHE_RS03610	10	738061	739470	D	24301590	-	RHE_RS03610	WP_011424076.1	469	COG1396	K	XRE family transcriptional regulator	692
RHE_RS30310	D	RHE_RS30310_m4	D	-99	-72	TACTTTGACTTGCCGCCGTCAATTTATA	27.0	2.1e-13	-29192	12678		RHE_RS04020	RHE_RS14770								RHE_RS08925	17	1826968	1827468	R	24299358	-	RHE_RS08925	WP_011425037.1	166	COG1522	K	Lrp/AsnC family transcriptional regulator	1719		RHE_RS03580	10	730470	733001	D	24298778	-	RHE_RS03580	WP_011424072.1	843	COG0840	NT	methyl-accepting chemotaxis protein	686
RHE_RS05495	R	RHE_RS30310_m5	R	-67	-56	CAAAGACTATTT	10.8	3.8e-06	-12481	5420		RHE_RS04025	RHE_RS14875								RHE_RS06845	17	1396358	1397197	R	24298848	-	RHE_RS06845	WP_020920836.1	279	COG2169	L	AraC family transcriptional regulator	1318		RHE_RS03500	10	709347	710186	D	24300750	-	RHE_RS03500	WP_011424056.1	279	COG1922	M	glycosyltransferase	670
RHE_RS08550	D	RHE_RS30310_m5	D	-317	-306	CCAAGTTTATTT	11.7	1.5e-06	-13410	5824		RHE_RS04030	RHE_RS14905								RHE_RS06535	17	1325425	1326318	R	24298369	-	RHE_RS06535	WP_011424616.1	297	COG0583	K	LysR family transcriptional regulator	1255		RHE_RS02810	10	575673	576356	R	24300850	-	RHE_RS02810	WP_011423925.1	227	COG2818	L	3-methyladenine DNA glycosylase	535
RHE_RS22030	R	RHE_RS30310_m5	R	-49	-38	TAAAGCATATTT	10.1	5.9e-06	-12041	5229		RHE_RS04060	RHE_RS14920								RHE_RS06135	17	1251452	1252069	D	24299594	-	RHE_RS06135	WP_011424536.1	205	COG1309	K	TetR/AcrR family transcriptional regulator	1176		RHE_RS02355	10	476830	478077	R	24300066	-	RHE_RS02355	WP_011423842.1	415	COG1846	K	ROK family transcriptional regulator	448
RHE_RS04735	R	RHE_RS30285_m1	R	-195	-178	GGAGTGTTTTGCCGTAAA	13.3	2.3e-07	-15285	6638		RHE_RS04065	RHE_RS15040								RHE_RS05255	17	1086690	1087337	R	24300250	-	RHE_RS05255	WP_011424377.1	215	COG1974	KT	transcriptional regulator	1010		RHE_RS00855	10	182424	183161	D	24298508	phnF	RHE_RS00855	WP_011423562.1	245	COG2188	K	phosphonate metabolism transcriptional regulator PhnF	161
RHE_RS12580	R	RHE_RS30285_m1	R	-80	-63	CAACTGCCCGCCCGTAAA	9.4	4.0e-06	-12429	5398		RHE_RS04070	RHE_RS15070								RHE_RS03515	17	713141	714169	R	24297618	-	RHE_RS03515	WP_011424059.1	342	COG1609	K	LacI family transcriptional regulator	673		RHE_RS30975	9	326742	327329	R	24297222	-	RHE_RS30975	WP_004679687.1	195	COG3153	R	MULTISPECIES: nodulation protein A	5958
RHE_RS12585	D	RHE_RS30285_m1	D	-394	-377	CAACTGCCCGCCCGTAAA	9.4	4.0e-06	-12429	5398		RHE_RS04080	RHE_RS15090								RHE_RS02715	17	555258	555905	R	24297594	-	RHE_RS02715	WP_011423908.1	215	COG2197	TK	DNA-binding response regulator	516		RHE_RS30830	9	301719	302705	D	24297384	-	RHE_RS30830	WP_010025697.1	328			MULTISPECIES: nodulation protein NodZ	5929
RHE_RS29775	R	RHE_RS30285_m1	R	-176	-159	GGAGTGTGATGCCGTTAC	13.0	2.7e-07	-15125	6569		RHE_RS04090	RHE_RS15210								RHE_RS02600	17	532567	533250	D	24301529	phoB	RHE_RS02600	WP_004672768.1	227	COG0745	TK	MULTISPECIES: phosphate regulon transcriptional regulatory protein PhoB	496		RHE_RS29840	9	93689	94369	D	24297393	-	RHE_RS29840	WP_004668612.1	226	COG1802	K	MULTISPECIES: GntR family transcriptional regulator	5746
RHE_RS30285	D	RHE_RS30285_m1	D	-318	-301	CAAGTGCCCGCGCGTAAA	14.5	7.6e-08	-16393	7119		RHE_RS04100	RHE_RS15225								RHE_RS02340	17	473887	474468	R	24300385	-	RHE_RS02340	WP_011423839.1	193			TetR/AcrR family transcriptional regulator	445		RHE_RS28950	9	548115	551141	R	24302853	-	RHE_RS28950	WP_042120020.1	1008	COG0383	G	alpha-mannosidase	5573
RHE_RS29775	R	RHE_RS30285_m2	R	-203	-184	ATCAACCACGTGTAGGGGTT	12.6	2.2e-07	-15330	6658		RHE_RS04120	RHE_RS15405								RHE_RS33140	16	313546	313737	D	31930227	-	RHE_RS33140	WP_004674400.1	63			MULTISPECIES: nitrogen fixation transcriptional regulator protein	5940		RHE_RS28890	9	535918	536547	D	24302865	-	RHE_RS28890	WP_042120018.1	209	COG1309	K	TetR family transcriptional regulator	5562
RHE_RS29775	R	RHE_RS30285_m2	R	-74	-55	CTAAACCCACTGATCGGGGA	17.1	5.8e-09	-18965	8237		RHE_RS04150	RHE_RS15555								RHE_RS29205	16	598951	599604	D	24302802	-	RHE_RS29205	WP_011428836.1	217	COG4566	TK	DNA-binding response regulator	5621		RHE_RS28885	9	533281	535746	R	24302866	-	RHE_RS28885	WP_011428778.1	821	COG1472	G	beta-glucosidase	5561
RHE_RS30285	D	RHE_RS30285_m2	D	-28	-9	TGAAACTCTCCATCGGGGTG	16.0	2.2e-08	-17632	7658		RHE_RS04190	RHE_RS15675								RHE_RS28890	16	535918	536547	D	24302865	-	RHE_RS28890	WP_042120018.1	209	COG1309	K	TetR family transcriptional regulator	5562		RHE_RS28425	9	431707	432558	D	24302958	-	RHE_RS28425	WP_011428689.1	283	COG1082	G	sugar phosphate isomerase/epimerase	5471
RHE_RS06235	R	RHE_RS30285_m3	R	-264	-251	GGATACCCCCCTAT	7.3	9.8e-06	-11533	5009		RHE_RS04235	RHE_RS15755								RHE_RS28020	16	344627	345355	D	24303039	-	RHE_RS28020	WP_020919624.1	242	COG2186	K	FadR family transcriptional regulator	5391		RHE_RS28420	9	430482	431369	R	24302959	-	RHE_RS28420	WP_011428688.1	295	COG1082	G	sugar phosphate isomerase/epimerase	5470
RHE_RS06240	D	RHE_RS30285_m3	D	-33	-20	GGATACCCCCCTAT	7.3	9.8e-06	-11533	5009		RHE_RS04310	RHE_RS15800								RHE_RS27280	16	171608	172357	R	24303187	-	RHE_RS27280	WP_011428471.1	249	COG1802	K	GntR family transcriptional regulator	5247		RHE_RS28010	9	343261	344268	D	24303041	-	RHE_RS28010	WP_011428612.1	335	COG1609	K	LacI family transcriptional regulator	5390
RHE_RS08570	D	RHE_RS30285_m3	D	-143	-130	CTAGAAGGCCCTGA	11.1	1.0e-06	-13816	6000		RHE_RS04315	RHE_RS15890								RHE_RS26765	16	67085	67843	D	24303290	-	RHE_RS26765	WP_011428377.1	252	COG2186	K	FadR family transcriptional regulator	5142		RHE_RS28005	9	341754	343052	R	24303042	-	RHE_RS28005	WP_011428611.1	432	COG3669	G	alpha-L-fucosidase	5389
RHE_RS15110	R	RHE_RS30285_m3	R	-146	-133	TGAGCACCCCCTGC	7.6	8.2e-06	-11711	5086		RHE_RS04350	RHE_RS15925								RHE_RS26680	16	54673	55200	D	24303307	-	RHE_RS26680	WP_011428363.1	175	COG1595	K	RNA polymerase sigma factor	5126		RHE_RS27240	9	165065	165433	R	24303195	-	RHE_RS27240	WP_011428463.1	122	COG1733	K	transcriptional regulator	5239
RHE_RS21900	R	RHE_RS30285_m4	R	-106	-95	AGAAAGTTAGTT	12.1	7.8e-07	-14064	6108		RHE_RS04370	RHE_RS15995								RHE_RS24475	16	100394	101236	R	24302668	-	RHE_RS24475	WP_011427946.1	280	COG2207	K	AraC family transcriptional regulator	4695		RHE_RS26635	9	44455	45159	D	24303316	-	RHE_RS26635	WP_011428354.1	234	COG2186	K	MULTISPECIES: transcriptional regulator NanR	5117
RHE_RS24330	D	RHE_RS30285_m4	D	-31	-20	CTAAATCTAGTT	9.4	6.9e-06	-11884	5161		RHE_RS04375	RHE_RS16100								RHE_RS24110	16	22944	23981	R	24302741	-	RHE_RS24110	WP_011427876.1	345	COG1609	K	LacI family transcriptional regulator	4621		RHE_RS26445	9	6055	6780	D	24303354	-	RHE_RS26445	WP_011428317.1	241	COG4221	C	SDR family NAD(P)-dependent oxidoreductase	5079
RHE_RS28025	D	RHE_RS30285_m4	D	-112	-101	TGAAAGCTAGTT	9.7	5.2e-06	-12167	5284		RHE_RS04380	RHE_RS16120								RHE_RS24095	16	19393	20133	R	24302744	-	RHE_RS24095	WP_041679049.1	246	COG1309	K	TetR/AcrR family transcriptional regulator	4618		RHE_RS26435	9	2500	3414	R	24303356	-	RHE_RS26435	WP_011428315.1	304	COG0583	K	hydrogen peroxide-inducible genes activator	5077
RHE_RS05615	D	RHE_RS30285_m5	D	-192	-183	GGGGTTGAGC	11.5	1.3e-06	-13553	5886		RHE_RS04420	RHE_RS16135								RHE_RS23180	16	65986	67062	R	24302213	-	RHE_RS23180	WP_011427693.1	358	COG2207	K	AraC family transcriptional regulator	4437		RHE_RS26265	9	473815	474234	R	24302310	-	RHE_RS26265	WP_011428282.1	139			hypothetical protein	5044
RHE_RS15025	R	RHE_RS30285_m5	R	-317	-308	TGGGTTGATC	10.8	4.4e-06	-12334	5357		RHE_RS04435	RHE_RS16205								RHE_RS19545	16	4047126	4047407	D	24300643	-	RHE_RS19545	WP_041678914.1	93	COG0271	T	MULTISPECIES: BolA family transcriptional regulator	3762		RHE_RS26165	9	452969	453694	R	24302330	minC	RHE_RS26165	WP_011428262.1	241	COG0850	D	septum formation inhibitor MinC	5024
RHE_RS30285	D	RHE_RS30285_m5	D	-63	-54	TGGGTTGAGC	13.1	7.0e-07	-14172	6155		RHE_RS04455	RHE_RS16230								RHE_RS17755	16	3659632	3660378	D	24301189	-	RHE_RS17755	WP_011426698.1	248	COG0217	KJ	YebC/PmpR family DNA-binding transcriptional regulator	3414		RHE_RS24655	9	144893	145966	R	24302632	-	RHE_RS24655	WP_011427980.1	357	COG0715	P	lipid kinase	4730
RHE_RS07750	R	RHE_RS30095_m1	R	-66	-37	ATCTCTTCCGTCCGTTTCCGGTGTTCAAAG	5.2	2.8e-06	-12786	5553		RHE_RS04465	RHE_RS16340								RHE_RS14210	16	2892768	2893256	R	24301176	-	RHE_RS14210	WP_011426023.1	162	COG1959	K	Rrf2 family transcriptional regulator	2734		RHE_RS24110	9	22944	23981	R	24302741	-	RHE_RS24110	WP_011427876.1	345	COG1609	K	LacI family transcriptional regulator	4621
RHE_RS17020	D	RHE_RS30095_m1	D	-197	-168	ATCATGAGCTTGCCTCAACTTAACGCAAGT	3.7	6.0e-06	-12024	5222		RHE_RS04485	RHE_RS16415								RHE_RS07925	16	1630357	1631538	R	24298690	-	RHE_RS07925	WP_011424880.1	393	COG1846	K	ROK family transcriptional regulator	1531		RHE_RS21900	9	177508	177729	R	24301712	-	RHE_RS21900	WP_011427449.1	73	COG1396	K	XRE family transcriptional regulator	4192
RHE_RS18225	R	RHE_RS30095_m2	R	-284	-263	GCCAAAATAGGACAGCAACACT	6.0	9.6e-06	-11554	5018		RHE_RS04500	RHE_RS16670								RHE_RS04030	16	838153	839109	R	24299214	-	RHE_RS04030	WP_011424150.1	318	COG0583	K	LysR family transcriptional regulator	769		RHE_RS20960	9	4344306	4345340	D	24298202	-	RHE_RS20960	WP_011427281.1	344	COG0136	E	aspartate-semialdehyde dehydrogenase	4041
RHE_RS19425	R	RHE_RS30095_m4	R	-84	-73	CGAAGCGATGGG	10.6	4.0e-06	-12429	5398		RHE_RS04510	RHE_RS16760								RHE_RS03085	16	627353	628084	R	24300395	-	RHE_RS03085	WP_011423975.1	243	COG2186	K	FadR family transcriptional regulator	587		RHE_RS19250	9	3991734	3992051	R	24298854	-	RHE_RS19250	WP_011426966.1	105			hypothetical protein	3704
RHE_RS30095	D	RHE_RS30095_m4	D	-221	-210	CGAAGCGATGGT	12.8	4.5e-07	-14614	6347		RHE_RS04535	RHE_RS16800								RHE_RS30745	15	285210	285884	R	24297464	-	RHE_RS30745	WP_029875595.1	224			MULTISPECIES: transcriptional regulator	5912		RHE_RS19180	9	3975527	3977467	D	24299355	-	RHE_RS19180	WP_042119044.1	646	COG0739	M	M23 family peptidase	3690
RHE_RS30095	D	RHE_RS30095_m4	D	-28	-17	GGAAGTGATGAT	13.3	2.3e-07	-15285	6638		RHE_RS04570	RHE_RS16815								RHE_RS30285	15	193329	193814	D	24297365	-	RHE_RS30285	WP_011053396.1	161			XRE family transcriptional regulator	5829		RHE_RS18145	9	3739361	3740518	D	24300334	pabB	RHE_RS18145	WP_011426768.1	385	COG0147	EH	aminodeoxychorismate synthase, component I	3491
RHE_RS09130	R	RHE_RS30095_m5	R	-204	-191	GGCCCCGTTCGCCT	10.3	5.0e-06	-12206	5301		RHE_RS04575	RHE_RS16825								RHE_RS29200	15	595866	598709	R	24302803	-	RHE_RS29200	WP_042120030.1	947	COG3710	K	LuxR family transcriptional regulator	5620		RHE_RS17135	9	3519397	3520308	D	24301596	-	RHE_RS17135	WP_020922119.1	303	COG0583	K	LysR family transcriptional regulator	3298
RHE_RS15360	D	RHE_RS30095_m5	D	-49	-36	TGCCCTGCCCGCTC	9.9	6.8e-06	-11899	5167		RHE_RS04590	RHE_RS17050								RHE_RS26070	15	428901	429641	D	24302349	-	RHE_RS26070	WP_011428243.1	246	COG2207	K	AraC family transcriptional regulator	5004		RHE_RS17115	9	3511787	3513571	R	24298089	-	RHE_RS17115	WP_011426579.1	594	COG0129	EG	dihydroxy-acid dehydratase	3294
RHE_RS30095	D	RHE_RS30095_m5	D	-88	-75	TGCCCTGTCCGCCT	15.7	7.6e-09	-18695	8119		RHE_RS04595	RHE_RS17055								RHE_RS22090	15	18664	19437	D	24302024	-	RHE_RS22090	WP_011427484.1	257	COG1349	KG	DeoR/GlpR transcriptional regulator	4228		RHE_RS16325	9	3349673	3350416	R	24298528	-	RHE_RS16325	WP_073990407.1	247	COG1129	G	sugar ABC transporter ATP-binding protein	3140
RHE_RS17305	R	RHE_RS29975_m1	R	-395	-384	CAGACAATCAGG	11.4	1.5e-06	-13410	5824		RHE_RS04645	RHE_RS17090								RHE_RS21355	15	57174	57914	D	24301821	-	RHE_RS21355	WP_011427357.1	246	COG0745	TK	MULTISPECIES: DNA-binding response regulator	4111		RHE_RS15890	9	3254161	3254610	D	24301077	-	RHE_RS15890	WP_042119308.1	149	COG1846	K	MarR family transcriptional regulator	3056
RHE_RS22060	D	RHE_RS29975_m1	D	-28	-17	CAAACAATCGGG	10.3	4.6e-06	-12289	5337		RHE_RS04720	RHE_RS17135								RHE_RS20710	15	4293842	4294750	R	24299916	-	RHE_RS20710	WP_011427238.1	302	COG0583	K	LysR family transcriptional regulator	3995		RHE_RS15885	9	3252993	3254006	R	24300536	-	RHE_RS15885	WP_011426342.1	337	COG0657	I	alpha/beta hydrolase	3055
RHE_RS29975	D	RHE_RS29975_m1	D	-87	-76	CAGACAATCGGG	14.5	8.3e-08	-16304	7081		RHE_RS04735	RHE_RS17145								RHE_RS19300	15	4004411	4004989	R	24301642	-	RHE_RS19300	WP_011426976.1	192	COG1309	K	TetR/AcrR family transcriptional regulator	3714		RHE_RS15225	9	3118119	3118412	D	24300427	-	RHE_RS15225	WP_011426219.1	97	COG0640	K	transcriptional regulator	2932
RHE_RS04735	R	RHE_RS29975_m2	R	-230	-218	TCGGCGGACAACC	9.6	4.3e-06	-12357	5367		RHE_RS04835	RHE_RS17170								RHE_RS19020	15	3943129	3943551	D	24300374	-	RHE_RS19020	WP_011426929.1	140	COG0789	K	MULTISPECIES: MerR family DNA-binding transcriptional regulator	3664		RHE_RS14740	9	3013550	3014248	R	24299311	-	RHE_RS14740	WP_020921819.1	232	COG1192	N	ParA family protein	2836
RHE_RS06640	R	RHE_RS29975_m2	R	-33	-21	TTATATGACAACC	9.0	6.5e-06	-11944	5187		RHE_RS04855	RHE_RS17200								RHE_RS18835	15	3899120	3900073	R	24300884	-	RHE_RS18835	WP_011426895.1	317	COG2390	K	sugar-binding transcriptional regulator	3628		RHE_RS14685	9	3001416	3002441	R	24299059	-	RHE_RS14685	WP_042119281.1	341	COG0640	K	methyltransferase domain-containing protein	2825
RHE_RS12615	R	RHE_RS29975_m2	R	-135	-123	TTGTCCGACAACC	11.2	1.5e-06	-13410	5824		RHE_RS04885	RHE_RS17305								RHE_RS18685	15	3869325	3870161	D	24298132	-	RHE_RS18685	WP_011426867.1	278	COG2207	K	AraC family transcriptional regulator	3598		RHE_RS14490	9	2955650	2956240	R	24300365	-	RHE_RS14490	WP_011426078.1	196	COG0847	L	DNA polymerase III subunit epsilon	2787
RHE_RS12620	D	RHE_RS29975_m2	D	-107	-95	TTGTCCGACAACC	11.2	1.5e-06	-13410	5824		RHE_RS04950	RHE_RS17450								RHE_RS18525	15	3833979	3834491	R	24298401	-	RHE_RS18525	WP_020922291.1	170	COG1846	K	MarR family transcriptional regulator	3567		RHE_RS14375	9	2926284	2926949	R	24301104	-	RHE_RS14375	WP_011426055.1	221	COG2885	M	MULTISPECIES: cell envelope biogenesis protein OmpA	2764
RHE_RS00475	R	RHE_RS29975_m3	R	-75	-64	GAAATTCCTATA	9.1	6.3e-06	-11975	5201		RHE_RS04955	RHE_RS17595								RHE_RS17055	15	3498861	3499223	R	24300688	-	RHE_RS17055	WP_011426567.1	120	COG0745	TK	MULTISPECIES: response regulator	3282		RHE_RS14215	9	2893689	2894069	D	24301175	-	RHE_RS14215	WP_011426024.1	126	COG4315	S	hypothetical protein	2735
RHE_RS00480	D	RHE_RS29975_m3	D	-105	-94	GAAATTCCTATA	9.1	6.3e-06	-11975	5201		RHE_RS05000	RHE_RS17755								RHE_RS15755	15	3225725	3226450	D	24300784	-	RHE_RS15755	WP_011426316.1	241	COG2197	TK	LuxR family transcriptional regulator	3030		RHE_RS14210	9	2892768	2893256	R	24301176	-	RHE_RS14210	WP_011426023.1	162	COG1959	K	Rrf2 family transcriptional regulator	2734
RHE_RS00740	R	RHE_RS29975_m3	R	-248	-237	GCGATTTCTAGT	9.0	6.6e-06	-11928	5180		RHE_RS05065	RHE_RS17835								RHE_RS15555	15	3181805	3182035	D	24301485	-	RHE_RS15555	WP_011426281.1	76			CopG family transcriptional regulator	2994		RHE_RS13805	9	2811883	2812440	D	24297907	-	RHE_RS13805	WP_011425947.1	185			DUF308 domain-containing protein	2657
RHE_RS12170	R	RHE_RS29975_m3	R	-181	-170	GAAATTATTAGT	8.4	9.8e-06	-11533	5009		RHE_RS05105	RHE_RS17840								RHE_RS14185	15	2888347	2889273	R	24298136	-	RHE_RS14185	WP_042118741.1	308	COG0583	K	LysR family transcriptional regulator	2729		RHE_RS13800	9	2811162	2811746	R	24301118	-	RHE_RS13800	WP_011425946.1	194	COG1309	K	TetR/AcrR family transcriptional regulator	2656
RHE_RS12175	D	RHE_RS29975_m3	D	-236	-225	GAAATTATTAGT	8.4	9.8e-06	-11533	5009		RHE_RS05170	RHE_RS18035								RHE_RS13450	15	2738911	2739735	R	24299590	-	RHE_RS13450	WP_011425877.1	274	COG1396	K	XRE family transcriptional regulator	2590		RHE_RS13450	9	2738911	2739735	R	24299590	-	RHE_RS13450	WP_011425877.1	274	COG1396	K	XRE family transcriptional regulator	2590
RHE_RS06640	R	RHE_RS29975_m4	R	-142	-129	GTTTGCCGGCAAAA	9.7	7.3e-06	-11828	5137		RHE_RS05175	RHE_RS18085								RHE_RS12520	15	2558832	2559767	D	24298668	-	RHE_RS12520	WP_011425705.1	311	COG0583	K	LysR family transcriptional regulator	2416		RHE_RS12535	9	2561320	2562246	R	24299411	-	RHE_RS12535	WP_011425708.1	308	COG1131	V	ABC transporter ATP-binding protein	2419
RHE_RS13740	D	RHE_RS29975_m4	D	-210	-197	CTTTGCCGGCAAAC	9.5	8.5e-06	-11675	5071		RHE_RS05185	RHE_RS18135								RHE_RS12325	15	2524728	2525468	R	24299427	-	RHE_RS12325	WP_011425670.1	246	COG0745	TK	DNA-binding response regulator	2380		RHE_RS11975	9	2448949	2449821	D	24299768	-	RHE_RS11975	WP_020921433.1	290	COG1686	M	D-alanyl-D-alanine carboxypeptidase	2314
RHE_RS13800	R	RHE_RS29975_m4	R	-125	-112	GTTAGTAGACAAAC	10.6	3.5e-06	-12563	5456		RHE_RS05190	RHE_RS18235								RHE_RS09025	15	1851350	1852318	D	24300916	-	RHE_RS09025	WP_011425057.1	322	COG0583	K	LysR family transcriptional regulator	1739		RHE_RS10550	9	2152621	2154216	D	24298131	-	RHE_RS10550	WP_011425328.1	531	COG0747	E	ABC transporter substrate-binding protein	2036
RHE_RS13805	D	RHE_RS29975_m4	D	-29	-16	GTTAGTAGACAAAC	10.6	3.5e-06	-12563	5456		RHE_RS05195	RHE_RS18270								RHE_RS08920	15	1826503	1826964	D	24299005	-	RHE_RS08920	WP_011425036.1	153	COG1522	K	Lrp/AsnC family transcriptional regulator	1718		RHE_RS10545	9	2151779	2152489	R	24297651	-	RHE_RS10545	WP_011425327.1	236	COG2186	K	FadR family transcriptional regulator	2035
RHE_RS26280	D	RHE_RS29975_m4	D	-104	-91	GTTTATAGACAAAC	11.2	2.0e-06	-13122	5699		RHE_RS05215	RHE_RS18340								RHE_RS07835	15	1613145	1613492	R	24297649	-	RHE_RS07835	WP_011424866.1	115	COG0784	T	response regulator	1517		RHE_RS10520	9	2146649	2147587	D	24297868	-	RHE_RS10520	WP_011425322.1	312	COG1175	G	sugar ABC transporter permease	2029
RHE_RS29975	D	RHE_RS29975_m4	D	-92	-79	GTTTGCAGACAATC	13.6	1.5e-07	-15713	6824		RHE_RS05220	RHE_RS18520								RHE_RS07105	15	1465826	1466578	D	24300133	-	RHE_RS07105	WP_011424727.1	250	COG0664	T	Crp/Fnr family transcriptional regulator	1370		RHE_RS09500	9	1945576	1945833	R	24298897	-	RHE_RS09500	WP_011425146.1	85	COG3811	S	hypothetical protein	1830
RHE_RS04735	R	RHE_RS29975_m5	R	-230	-216	ATTCGGCGGACAACC	9.9	3.9e-06	-12455	5409		RHE_RS05255	RHE_RS18525								RHE_RS06580	15	1332690	1333361	D	24301574	-	RHE_RS06580	WP_011424625.1	223	COG0745	TK	DNA-binding response regulator	1264		RHE_RS09310	9	1909807	1910664	D	24298440	-	RHE_RS09310	WP_041678867.1	285	COG1354	L	segregation/condensation protein A	1794
RHE_RS05655	D	RHE_RS29975_m5	D	-119	-105	TTACGCAGGACAACC	10.8	2.0e-06	-13122	5699		RHE_RS05260	RHE_RS18560								RHE_RS05915	15	1206549	1207445	D	24298628	-	RHE_RS05915	WP_011424494.1	298	COG0583	K	LysR family transcriptional regulator	1132		RHE_RS08550	9	1763615	1763986	D	24297873	-	RHE_RS08550	WP_011424978.1	123	COG0048	J	MULTISPECIES: 30S ribosomal protein S12	1646
RHE_RS07105	D	RHE_RS29975_m5	D	-140	-126	TTTCGTTGGGCAAGC	10.5	2.5e-06	-12899	5602		RHE_RS05265	RHE_RS18650								RHE_RS04310	15	897493	898287	D	24300904	-	RHE_RS04310	WP_011424205.1	264	COG1414	K	IclR family transcriptional regulator	825		RHE_RS07925	9	1630357	1631538	R	24298690	-	RHE_RS07925	WP_011424880.1	393	COG1846	K	ROK family transcriptional regulator	1531
RHE_RS17605	D	RHE_RS29975_m5	D	-69	-55	TTTCGCATGACAAGC	11.3	1.3e-06	-13553	5886		RHE_RS05315	RHE_RS18665								RHE_RS04010	15	834800	835717	R	24299065	-	RHE_RS04010	WP_042117962.1	305	COG0583	K	LysR family transcriptional regulator	765		RHE_RS07670	9	1580798	1581256	R	24299802	-	RHE_RS07670	WP_011424836.1	152	COG1714	S	RDD family protein	1484
RHE_RS26680	D	RHE_RS29975_m5	D	-60	-46	TATCGTACGGCAACG	8.9	8.5e-06	-11675	5071		RHE_RS05330	RHE_RS18680								RHE_RS03775	15	783013	783618	D	24299159	-	RHE_RS03775	WP_042117931.1	201	COG1595	K	RNA polymerase sigma factor	721		RHE_RS05790	9	1186036	1186482	D	24297560	-	RHE_RS05790	WP_011424474.1	148	COG1959	K	Rrf2 family transcriptional regulator	1110
RHE_RS29840	D	RHE_RS29840_m1	D	-297	-287	ACCGTGGACAC	15.0	1.1e-07	-16023	6959		RHE_RS05335	RHE_RS18685								RHE_RS03210	15	655974	656270	D	24300658	-	RHE_RS03210	WP_020920372.1	98	COG1396	K	XRE family transcriptional regulator	612		RHE_RS05495	9	1129379	1129708	R	24297494	-	RHE_RS05495	WP_011424419.1	109	COG0640	K	ArsR family transcriptional regulator	1055
RHE_RS01550	R	RHE_RS29840_m2	R	-78	-50	GGCTTAAATCTGTTAAAAAGTGGCGAAAA	0.2	9.4e-06	-11575	5027		RHE_RS05380	RHE_RS18710								RHE_RS02765	15	563154	563654	R	24301081	-	RHE_RS02765	WP_004672867.1	166	COG1959	K	MULTISPECIES: Rrf2 family transcriptional regulator	526		RHE_RS04510	9	940694	941260	R	24297726	-	RHE_RS04510	WP_004680407.1	188			MULTISPECIES: hypothetical protein	864
RHE_RS10220	D	RHE_RS29840_m2	D	-58	-30	CGCTCGATCCTTTTCGCTTTTTGCTATTT	4.4	1.3e-06	-13553	5886		RHE_RS05450	RHE_RS18760								RHE_RS01265	15	263547	264116	D	24301652	-	RHE_RS01265	WP_011423635.1	189	COG1396	K	XRE family transcriptional regulator	239		RHE_RS02015	9	413262	413594	R	24297579	-	RHE_RS02015	WP_011423780.1	110			LapA family protein	384
RHE_RS16615	D	RHE_RS29840_m2	D	-222	-194	CGCTCAATCTTTTCGGCATCGTGCTCAGG	3.1	2.4e-06	-12940	5620		RHE_RS05495	RHE_RS18795								RHE_RS01095	15	228427	228777	D	24299497	-	RHE_RS01095	WP_011423607.1	116	COG1846	K	MULTISPECIES: MarR family transcriptional regulator	206		RHE_RS00725	9	150848	151213	D	24301150	-	RHE_RS00725	WP_011423536.1	121	COG1476	K	XRE family transcriptional regulator	135
RHE_RS24980	D	RHE_RS29840_m2	D	-183	-155	CGCTCAACGGACCACAATAGTTGTAGAAA	0.6	7.9e-06	-11749	5102		RHE_RS05510	RHE_RS18835								RHE_RS30570	14	253590	254093	R	24297136	-	RHE_RS30570	WP_010069248.1	167	COG1396	K	MULTISPECIES: XRE family transcriptional regulator	5883		RHE_RS00380	9	79584	80612	D	24301112	-	RHE_RS00380	WP_011423471.1	342	COG1609	K	LacI family transcriptional regulator	67
RHE_RS29170	D	RHE_RS29840_m2	D	-32	-4	CGCTCAGTCTTCGACTACAGGAGATTAGA	0.3	9.0e-06	-11618	5046		RHE_RS05515	RHE_RS18865								RHE_RS28725	14	493583	493927	D	24302898	-	RHE_RS28725	WP_011428746.1	114			transcriptional regulator	5529		RHE_RS30005	8	131610	132731	D	24297246	-	RHE_RS30005	WP_011053356.1	373	COG2141	HR	MULTISPECIES: LLM class flavin-dependent oxidoreductase	5777
RHE_RS29840	D	RHE_RS29840_m2	D	-120	-92	GGCTCAATCCTCTAGAATAGTTGCTAATG	36.3	8.4e-19	-41621	18076		RHE_RS05570	RHE_RS18900								RHE_RS28555	14	461297	461926	D	24302932	-	RHE_RS28555	WP_011428713.1	209	COG1309	K	TetR/AcrR family transcriptional regulator	5497		RHE_RS29620	8	42328	43086	D	24297206	-	RHE_RS29620	WP_032984877.1	252	COG0300	R	MULTISPECIES: KR domain-containing protein	5703
RHE_RS29840	D	RHE_RS29840_m3	D	-359	-335	TGCCAAGCTGCACCCGGCCCTTAGT	28.7	6.8e-16	-34924	15167		RHE_RS05615	RHE_RS18970								RHE_RS28545	14	458466	459071	R	24302934	-	RHE_RS28545	WP_011428711.1	201	COG1917	R	transcriptional regulator	5495		RHE_RS28780	8	508662	509975	D	24302887	-	RHE_RS28780	WP_011428757.1	437	COG0715	P	nitrate ABC transporter substrate-binding protein	5540
RHE_RS04435	D	RHE_RS29840_m4	D	-100	-90	CACCACACAGC	8.1	8.1e-06	-11724	5092		RHE_RS05655	RHE_RS19020								RHE_RS27925	14	320585	321622	D	24303058	-	RHE_RS27925	WP_011428595.1	345	COG1609	K	LacI family transcriptional regulator	5373		RHE_RS27845	8	295763	296230	R	24303074	-	RHE_RS27845	WP_011428579.1	155	COG1522	K	Lrp/AsnC family transcriptional regulator	5358
RHE_RS05105	D	RHE_RS29840_m4	D	-68	-58	CTCTAAACAGG	9.3	4.1e-06	-12405	5387		RHE_RS05725	RHE_RS19030								RHE_RS26720	14	61512	62237	D	24303299	-	RHE_RS26720	WP_011428372.1	241	COG0664	T	Crp/Fnr family transcriptional regulator	5134		RHE_RS26945	8	101767	102909	D	24303254	-	RHE_RS26945	WP_042119963.1	380			DUF1612 domain-containing protein	5177
RHE_RS12580	R	RHE_RS29840_m4	R	-138	-128	CTCCACACACC	8.4	7.0e-06	-11870	5155		RHE_RS05730	RHE_RS19300								RHE_RS25185	14	256924	257913	D	24302526	-	RHE_RS25185	WP_082239851.1	329	COG0583	K	LysR family transcriptional regulator	4832		RHE_RS26730	8	62408	62710	R	24303297	-	RHE_RS26730	WP_011428373.1	100			hypothetical protein	5136
RHE_RS12585	D	RHE_RS29840_m4	D	-329	-319	CTCCACACACC	8.4	7.0e-06	-11870	5155		RHE_RS05735	RHE_RS19425								RHE_RS24350	14	76908	77807	R	24302693	-	RHE_RS24350	WP_011427922.1	299	COG0583	K	LysR family transcriptional regulator	4669		RHE_RS26440	8	3559	5745	D	24303355	katG	RHE_RS26440	WP_011428316.1	728	COG0376	P	catalase peroxidase	5078
RHE_RS29840	D	RHE_RS29840_m4	D	-132	-122	CTCTACACAGC	16.2	5.1e-08	-16791	7292		RHE_RS05780	RHE_RS19545								RHE_RS23055	14	38022	39080	D	24302238	-	RHE_RS23055	WP_011427668.1	352	COG1609	K	LacI family transcriptional regulator	4414		RHE_RS26050	8	424705	425928	D	24302353	-	RHE_RS26050	WP_042119902.1	407	COG2211	G	MFS transporter	5000
RHE_RS04100	R	RHE_RS29775_m1	R	-162	-144	TAAACTTTTCGTCAGGGTT	11.5	1.4e-06	-13479	5854		RHE_RS05790	RHE_RS19670								RHE_RS21900	14	177508	177729	R	24301712	-	RHE_RS21900	WP_011427449.1	73	COG1396	K	XRE family transcriptional regulator	4192		RHE_RS26030	8	421933	422415	R	24302357	-	RHE_RS26030	WP_011428236.1	160			hypothetical protein	4996
RHE_RS13740	D	RHE_RS29775_m1	D	-105	-87	AAAACCATTCACCGCGGTG	9.4	9.6e-06	-11554	5018		RHE_RS05815	RHE_RS19695								RHE_RS18135	14	3735539	3737080	R	24300386	-	RHE_RS18135	WP_011426766.1	513	COG2204	T	sigma-54-dependent Fis family transcriptional regulator	3489		RHE_RS25185	8	256924	257913	D	24302526	-	RHE_RS25185	WP_082239851.1	329	COG0583	K	LysR family transcriptional regulator	4832
RHE_RS16350	D	RHE_RS29775_m1	D	-143	-125	GGAAATACTACTCAGGGTA	10.0	5.8e-06	-12058	5237		RHE_RS05820	RHE_RS19745								RHE_RS17840	14	3677794	3678330	D	24300876	-	RHE_RS17840	WP_011426714.1	178	COG1396	K	XRE family transcriptional regulator	3430		RHE_RS23635	8	170069	170533	R	24302122	-	RHE_RS23635	WP_011427784.1	154	COG1522	K	Lrp/AsnC family transcriptional regulator	4528
RHE_RS25320	D	RHE_RS29775_m1	D	-217	-199	AAAACTACTCCTCAGGGGG	13.2	2.1e-07	-15376	6678		RHE_RS05855	RHE_RS19750								RHE_RS16760	14	3437035	3437829	D	24299921	-	RHE_RS16760	WP_011426509.1	264	COG0784	T	two-component response regulator	3225		RHE_RS23165	8	64026	65171	R	24302216	-	RHE_RS23165	WP_011427691.1	381	COG1960	I	isovaleryl-CoA dehydrogenase	4434
RHE_RS29775	R	RHE_RS29775_m1	R	-203	-185	TCAACCACGTGTAGGGGTT	14.4	4.0e-08	-17034	7398		RHE_RS05865	RHE_RS20060								RHE_RS15925	14	3261738	3262313	D	24301339	-	RHE_RS15925	WP_011426350.1	191	COG1695	K	PadR family transcriptional regulator	3063		RHE_RS23065	8	40175	40879	D	24302236	-	RHE_RS23065	WP_011427670.1	234	COG1802	K	GntR family transcriptional regulator	4416
RHE_RS29775	R	RHE_RS29775_m1	R	-75	-57	AAACCCACTGATCGGGGAG	11.7	1.2e-06	-13633	5921		RHE_RS05915	RHE_RS20110								RHE_RS14115	14	2872027	2872935	R	24298049	-	RHE_RS14115	WP_011426004.1	302	COG4977	K	AraC family transcriptional regulator	2715		RHE_RS22910	8	10725	11285	D	24302267	msuE	RHE_RS22910	WP_011427639.1	186	COG0431	C	FMN reductase	4385
RHE_RS29775	R	RHE_RS29775_m1	R	-74	-56	TAAACCCACTGATCGGGGA	13.7	1.1e-07	-16023	6959		RHE_RS05935	RHE_RS20285								RHE_RS12915	14	2635614	2636633	D	24299323	-	RHE_RS12915	WP_042118637.1	339	COG4977	K	GlxA family transcriptional regulator	2491		RHE_RS21975	8	189508	190131	R	24301697	-	RHE_RS21975	WP_011427463.1	207	COG3916	T	GNAT family N-acetyltransferase	4207
RHE_RS30285	D	RHE_RS29775_m1	D	-28	-10	TGAAACTCTCCATCGGGGT	11.5	1.4e-06	-13479	5854		RHE_RS05945	RHE_RS20460								RHE_RS11860	14	2418634	2419485	R	24300367	-	RHE_RS11860	WP_020921417.1	283	COG2207	K	AraC family transcriptional regulator	2293		RHE_RS21005	8	4357988	4359658	R	24301115	-	RHE_RS21005	WP_042119131.1	556	COG5360	S	heparinase	4049
RHE_RS30285	D	RHE_RS29775_m1	D	-27	-9	GAAACTCTCCATCGGGGTG	13.7	1.1e-07	-16023	6959		RHE_RS05950	RHE_RS20490								RHE_RS08785	14	1799309	1800364	D	24301455	-	RHE_RS08785	WP_011425012.1	351	COG1609	K	LacI family DNA-binding transcriptional regulator	1692		RHE_RS20610	8	4270014	4271870	R	24300954	-	RHE_RS20610	WP_011427218.1	618	COG4178	R	ABC transporter ATP-binding protein/permease	3975
RHE_RS14490	R	RHE_RS29775_m2	R	-251	-236	CAGGGGTTTCGAAACT	3.6	8.8e-06	-11641	5056		RHE_RS06000	RHE_RS20575								RHE_RS05510	14	1130821	1131150	R	24299014	-	RHE_RS05510	WP_011424422.1	109	COG0640	K	transcriptional regulator	1058		RHE_RS19935	8	4130946	4131341	R	24298304	sdhC	RHE_RS19935	WP_010020710.1	131	COG2009	C	MULTISPECIES: succinate dehydrogenase, cytochrome b556 subunit	3838
RHE_RS15835	D	RHE_RS29775_m2	D	-153	-138	TAGGCTTGTCCACAAC	3.8	7.9e-06	-11749	5102		RHE_RS06005	RHE_RS20580								RHE_RS05315	14	1094963	1095646	R	24300376	-	RHE_RS05315	WP_042119188.1	227	COG0745	TK	DNA-binding response regulator	1022		RHE_RS19450	8	4030596	4031306	D	24298387	-	RHE_RS19450	WP_042119341.1	236	COG1434	R	YdcF family protein	3743
RHE_RS17020	D	RHE_RS29775_m2	D	-97	-82	TAGGGTTACCAACACC	5.3	1.8e-06	-13228	5745		RHE_RS06015	RHE_RS20595								RHE_RS03175	14	648102	648479	D	24300681	-	RHE_RS03175	WP_011423992.1	125	COG0745	TK	response regulator	605		RHE_RS18935	8	3922731	3923552	D	24299674	-	RHE_RS18935	WP_011426915.1	273	COG1028	IQR	SDR family NAD(P)-dependent oxidoreductase	3647
RHE_RS18560	D	RHE_RS29775_m2	D	-185	-170	TACCGATTTCCTCACC	3.5	9.7e-06	-11543	5013		RHE_RS06050	RHE_RS20625								RHE_RS02835	14	582782	583225	R	24301251	-	RHE_RS02835	WP_011423930.1	147	COG1846	K	MarR family transcriptional regulator	540		RHE_RS18710	8	3875348	3876256	D	24298177	-	RHE_RS18710	WP_011426872.1	302	COG0583	K	LysR family transcriptional regulator	3603
RHE_RS29775	R	RHE_RS29775_m2	R	-211	-196	TAGGGGTTTCCACACC	23.7	3.2e-11	-24165	10495		RHE_RS06070	RHE_RS20710								RHE_RS02315	14	468071	469603	R	24299253	-	RHE_RS02315	WP_011423834.1	510	COG0457	R	transcriptional regulator	440		RHE_RS18705	8	3874414	3875169	R	24298178	-	RHE_RS18705	WP_011426871.1	251			hypothetical protein	3602
RHE_RS14540	R	RHE_RS29775_m3	R	-375	-356	AAGAGTGACTCGGCGTGCAG	6.5	4.9e-06	-12226	5310		RHE_RS06105	RHE_RS20825								RHE_RS02165	14	442766	443131	D	24300565	-	RHE_RS02165	WP_042117808.1	121	COG0640	K	ArsR family transcriptional regulator	414		RHE_RS17405	8	3579009	3579215	D	24299584	-	RHE_RS17405	WP_011426631.1	68			hypothetical protein	3344
RHE_RS18675	R	RHE_RS29775_m3	R	-139	-120	GAAAATGCGAAACCGTAAAC	6.4	5.1e-06	-12186	5292		RHE_RS06135	RHE_RS21205								RHE_RS28010	13	343261	344268	D	24303041	-	RHE_RS28010	WP_011428612.1	335	COG1609	K	LacI family transcriptional regulator	5390		RHE_RS17200	8	3535166	3535630	R	24298572	-	RHE_RS17200	WP_011426596.1	154	COG1959	K	Rrf2 family transcriptional regulator	3311
RHE_RS18680	D	RHE_RS29775_m3	D	-36	-17	GAAAATGCGAAACCGTAAAC	6.4	5.1e-06	-12186	5292		RHE_RS06175	RHE_RS21355								RHE_RS27195	13	154549	155310	D	24303204	-	RHE_RS27195	WP_011428454.1	253	COG0664	T	Crp/Fnr family transcriptional regulator	5229		RHE_RS17170	8	3526070	3526534	R	24297922	-	RHE_RS17170	WP_011426590.1	154	COG1846	K	MarR family transcriptional regulator	3305
RHE_RS19270	R	RHE_RS29775_m3	R	-184	-165	GGGCGTTTCAAGGCGTGCGC	10.2	7.2e-07	-14144	6143		RHE_RS06200	RHE_RS21900								RHE_RS27185	13	152553	153446	D	24303206	-	RHE_RS27185	WP_042119981.1	297	COG0583	K	LysR family transcriptional regulator	5227		RHE_RS16870	8	3460849	3462039	D	24298445	-	RHE_RS16870	WP_011426532.1	396	COG0845	MV	efflux RND transporter periplasmic adaptor subunit	3246
RHE_RS19275	D	RHE_RS29775_m3	D	-86	-67	GGGCGTTTCAAGGCGTGCGC	10.2	7.2e-07	-14144	6143		RHE_RS06215	RHE_RS21915								RHE_RS26115	13	440314	441060	R	24302340	-	RHE_RS26115	WP_011428251.1	248	COG2186	K	FadR family transcriptional regulator	5012		RHE_RS16825	8	3451545	3452195	R	24299420	-	RHE_RS16825	WP_011426523.1	216	COG1309	K	TetR family transcriptional regulator	3236
RHE_RS29775	R	RHE_RS29775_m3	R	-90	-71	GGGAGTTGGAAACCGTACAC	17.9	3.0e-09	-19625	8523		RHE_RS06235	RHE_RS22020								RHE_RS24725	13	164909	165793	D	24302618	-	RHE_RS24725	WP_042119842.1	294	COG0583	K	LysR family transcriptional regulator	4745		RHE_RS16760	8	3437035	3437829	D	24299921	-	RHE_RS16760	WP_011426509.1	264	COG0784	T	two-component response regulator	3225
RHE_RS29775	R	RHE_RS29775_m3	R	-38	-19	GAGAGTTTCACGCGGTGCGC	18.5	1.4e-09	-20387	8854		RHE_RS06240	RHE_RS22030								RHE_RS22830	13	179736	180188	D	24301876	-	RHE_RS22830	WP_042119690.1	150	COG1396	K	transcriptional regulator	4370		RHE_RS16755	8	3436581	3436787	R	24299922	-	RHE_RS16755	WP_011426508.1	68			MULTISPECIES: hypothetical protein	3224
RHE_RS30285	D	RHE_RS29775_m3	D	-319	-300	ACAAGTGCCCGCGCGTAAAG	8.4	1.9e-06	-13174	5721		RHE_RS06305	RHE_RS22090								RHE_RS21915	13	179066	179806	R	24301709	-	RHE_RS21915	WP_032490539.1	246	COG2771	K	LuxR family transcriptional regulator	4195		RHE_RS16660	8	3424474	3425259	R	24300136	-	RHE_RS16660	WP_011426490.1	261	COG4813	G	trehalose utilization protein ThuA	3205
RHE_RS07205	R	RHE_RS29775_m4	R	-64	-37	GTTAGCGAAAAACCAGCTCCTGAGCAAT	2.8	2.8e-06	-12786	5553		RHE_RS06325	RHE_RS22190								RHE_RS20460	13	4235959	4236714	D	24301195	-	RHE_RS20460	WP_011427189.1	251	COG2197	TK	LuxR family transcriptional regulator	3944		RHE_RS16565	8	3404403	3405722	D	24298281	-	RHE_RS16565	WP_020922045.1	439	COG1004	M	UDP-glucose/GDP-mannose dehydrogenase family protein	3186
RHE_RS07210	D	RHE_RS29775_m4	D	-339	-312	GTTAGCGAAAAACCAGCTCCTGAGCAAT	2.8	2.8e-06	-12786	5553		RHE_RS06345	RHE_RS22605								RHE_RS19695	13	4080725	4081153	R	24298367	-	RHE_RS19695	WP_011427046.1	142	COG1522	K	MULTISPECIES: Lrp/AsnC family transcriptional regulator	3791		RHE_RS16480	8	3383343	3384320	D	24301349	-	RHE_RS16480	WP_041678734.1	325	COG1216	G	glycosyltransferase family 2 protein	3169
RHE_RS07330	R	RHE_RS29775_m4	R	-253	-226	GTTAGCGCGATGACATCGGCCACGCAGC	1.0	5.8e-06	-12058	5237		RHE_RS06405	RHE_RS22770								RHE_RS18680	13	3868538	3869218	D	24298133	-	RHE_RS18680	WP_011426866.1	226	COG1309	K	TetR/AcrR family transcriptional regulator	3597		RHE_RS15775	8	3229392	3229994	R	24299015	-	RHE_RS15775	WP_011426320.1	200	COG1435	F	MULTISPECIES: thymidine kinase	3033
RHE_RS20585	R	RHE_RS29775_m4	R	-71	-44	GGCAAGGGGAACTCAACAGGTGTGCACC	0.0	8.7e-06	-11652	5060		RHE_RS06410	RHE_RS22830								RHE_RS16815	13	3449841	3450740	D	24299507	-	RHE_RS16815	WP_042118944.1	299	COG0583	K	LysR family transcriptional regulator	3235		RHE_RS15515	8	3174140	3174631	D	24300617	-	RHE_RS15515	WP_020921911.1	163	COG2030	I	MaoC-like hydratase	2986
RHE_RS29775	R	RHE_RS29775_m4	R	-270	-243	GATAGCGGGAATCCGCCCGCTGCGCAAC	24.6	2.4e-12	-26756	11620		RHE_RS06435	RHE_RS22955								RHE_RS16670	13	3425813	3426376	R	24298291	-	RHE_RS16670	WP_042118936.1	187	COG1309	K	TetR/AcrR family transcriptional regulator	3207		RHE_RS15405	8	3152452	3152943	R	24300518	-	RHE_RS15405	WP_020921896.1	163	COG1846	K	MarR family transcriptional regulator	2965
RHE_RS29775	R	RHE_RS29775_m4	R	-221	-194	TGTAGGGGTTTCCACACCCCAGGGCAGC	25.8	3.7e-13	-28625	12432		RHE_RS06465	RHE_RS23055								RHE_RS16120	13	3303747	3304775	D	24298619	-	RHE_RS16120	WP_011426386.1	342	COG1609	K	LacI family DNA-binding transcriptional regulator	3101		RHE_RS14055	8	2858890	2859540	R	24297841	-	RHE_RS14055	WP_039620788.1	216	COG1309	K	MULTISPECIES: TetR/AcrR family transcriptional regulator	2704
RHE_RS30285	D	RHE_RS29775_m4	D	-59	-32	TTGAGCGAGTTTTCAGCGGGGGCGCACC	16.5	2.1e-09	-19981	8678		RHE_RS06535	RHE_RS23065								RHE_RS15995	13	3277045	3277941	D	24300166	-	RHE_RS15995	WP_042118871.1	298	COG0583	K	LysR family transcriptional regulator	3077		RHE_RS13965	8	2840517	2840987	D	24301603	-	RHE_RS13965	WP_011425975.1	156	COG1846	K	MarR family transcriptional regulator	2686
RHE_RS14490	R	RHE_RS29775_m5	R	-253	-236	CAGGGGTTTCGAAACTCG	1.6	8.6e-06	-11664	5066		RHE_RS06555	RHE_RS23080								RHE_RS15070	13	3073946	3074740	R	24300822	-	RHE_RS15070	WP_011426189.1	264	COG2207	K	AraC family transcriptional regulator	2901		RHE_RS13960	8	2839558	2840325	R	24301604	-	RHE_RS13960	WP_011425974.1	255	COG1075	I	alpha/beta hydrolase	2685
RHE_RS15835	D	RHE_RS29775_m5	D	-153	-136	TAGGCTTGTCCACAACCG	1.4	9.3e-06	-11585	5032		RHE_RS06560	RHE_RS23130								RHE_RS14175	13	2886372	2887064	D	24297801	-	RHE_RS14175	WP_011426016.1	230	COG0789	K	MerR family DNA-binding transcriptional regulator	2727		RHE_RS13580	8	2766894	2767496	D	24298596	-	RHE_RS13580	WP_011425903.1	200			hypothetical protein	2613
RHE_RS31305	R	RHE_RS29775_m5	R	-38	-21	TACCGGTTAACACGCCCC	2.8	2.5e-06	-12899	5602		RHE_RS06565	RHE_RS23180								RHE_RS14100	13	2868014	2869018	D	24298805	-	RHE_RS14100	WP_011426001.1	334	COG2390	K	sugar-binding transcriptional regulator	2712		RHE_RS13235	8	2696663	2697040	R	24299127	-	RHE_RS13235	WP_011425837.1	125	COG1733	K	transcriptional regulator	2551
RHE_RS29775	R	RHE_RS29775_m5	R	-213	-196	TAGGGGTTTCCACACCCC	27.1	1.0e-12	-27631	12000		RHE_RS06580	RHE_RS23325								RHE_RS13800	13	2811162	2811746	R	24301118	-	RHE_RS13800	WP_011425946.1	194	COG1309	K	TetR/AcrR family transcriptional regulator	2656		RHE_RS12670	8	2590396	2591115	D	24301393	-	RHE_RS12670	WP_011425734.1	239	COG0664	T	Crp/Fnr family transcriptional regulator	2445
RHE_RS30285	D	RHE_RS29775_m5	D	-215	-198	TTGGGGCTTCGTAACCCC	2.5	3.4e-06	-12592	5469		RHE_RS06590	RHE_RS23350								RHE_RS12940	13	2641578	2641934	D	24297485	-	RHE_RS12940	WP_011425784.1	118	COG0640	K	ArsR family transcriptional regulator	2496		RHE_RS11860	8	2418634	2419485	R	24300367	-	RHE_RS11860	WP_020921417.1	283	COG2207	K	AraC family transcriptional regulator	2293
RHE_RS02045	D	RHE_RS29630_m2	D	-74	-55	TGGATTTCCGTGGCCTGAAG	8.2	5.7e-06	-12075	5244		RHE_RS06620	RHE_RS23465								RHE_RS12035	13	2463809	2464102	R	24297700	-	RHE_RS12035	WP_011425615.1	97	COG1737	K	MurR/RpiR family transcriptional regulator	2326		RHE_RS10890	8	2228912	2229652	D	24299303	-	RHE_RS10890	WP_042118472.1	246	COG0745	TK	DNA-binding response regulator	2104
RHE_RS08525	D	RHE_RS29630_m2	D	-198	-179	AAGACCCGAATTGCATGAAG	8.0	6.5e-06	-11944	5187		RHE_RS06640	RHE_RS23470								RHE_RS10545	13	2151779	2152489	R	24297651	-	RHE_RS10545	WP_011425327.1	236	COG2186	K	FadR family transcriptional regulator	2035		RHE_RS10220	8	2081072	2085139	D	24298335	-	RHE_RS10220	WP_042118412.1	1355			XRE family transcriptional regulator	1969
RHE_RS29630	D	RHE_RS29630_m2	D	-245	-226	AAGATCTTCATTGCATGACG	20.2	9.3e-11	-23098	10032		RHE_RS06655	RHE_RS23520								RHE_RS10425	13	2128648	2129160	D	24300520	-	RHE_RS10425	WP_011425303.1	170	COG1846	K	MarR family transcriptional regulator	2010		RHE_RS09720	8	1985470	1986303	D	24298487	cysE	RHE_RS09720	WP_004675925.1	277	COG1045	E	MULTISPECIES: serine O-acetyltransferase	1870
RHE_RS15110	R	RHE_RS29630_m3	R	-329	-318	GAAGCGCTCAAA	9.6	7.7e-06	-11774	5114		RHE_RS06660	RHE_RS23540								RHE_RS07315	13	1504940	1505761	D	24297877	-	RHE_RS07315	WP_011424768.1	273	COG2207	K	AraC family transcriptional regulator	1412		RHE_RS08160	8	1679771	1680376	R	24298612	-	RHE_RS08160	WP_010009373.1	201			MULTISPECIES: class I SAM-dependent methyltransferase	1575
RHE_RS28340	D	RHE_RS29630_m3	D	-28	-17	GAAGCTGTCAAG	10.5	3.4e-06	-12592	5469		RHE_RS06685	RHE_RS23555								RHE_RS06175	13	1257609	1258301	R	24298525	-	RHE_RS06175	WP_011424544.1	230	COG2378	K	YafY family transcriptional regulator	1184		RHE_RS07295	8	1500669	1501286	R	24299556	-	RHE_RS07295	WP_011424764.1	205	COG1286	S	CvpA family protein	1408
RHE_RS29630	D	RHE_RS29630_m4	D	-200	-187	TCAGCGACCGGGCC	15.4	1.1e-08	-18325	7959		RHE_RS06700	RHE_RS23635								RHE_RS05790	13	1186036	1186482	D	24297560	-	RHE_RS05790	WP_011424474.1	148	COG1959	K	Rrf2 family transcriptional regulator	1110		RHE_RS07285	8	1498132	1498872	R	24300804	-	RHE_RS07285	WP_011424762.1	246	COG1028	IQR	KR domain-containing protein	1406
RHE_RS29630	D	RHE_RS29630_m5	D	-165	-140	ATCCAACATGGATCACTAGGTCAAAT	18.6	1.1e-11	-25233	10959		RHE_RS06705	RHE_RS23665								RHE_RS03180	13	648955	649659	D	24300680	-	RHE_RS03180	WP_011423993.1	234	COG2197	TK	helix-turn-helix transcriptional regulator	606		RHE_RS07210	8	1483268	1483582	D	24301684	-	RHE_RS07210	WP_011424747.1	104	COG0640	K	ArsR family transcriptional regulator	1391
RHE_RS05170	R	RHE_RS29535_m1	R	-84	-74	ACAGCACTCGT	8.6	7.8e-06	-11761	5108		RHE_RS06725	RHE_RS23695								RHE_RS02710	13	554463	555134	R	24301630	-	RHE_RS02710	WP_011423907.1	223	COG2932	X	helix-turn-helix transcriptional regulator	515		RHE_RS07205	8	1482198	1482896	R	24301685	-	RHE_RS07205	WP_011424746.1	232	COG0688	I	phosphatidylserine decarboxylase proenzyme	1390
RHE_RS05175	D	RHE_RS29535_m1	D	-42	-32	ACAGCACTCGT	8.6	7.8e-06	-11761	5108		RHE_RS06825	RHE_RS23775								RHE_RS02045	13	417495	419054	D	24298077	rpoN	RHE_RS02045	WP_011423785.1	519	COG1508	K	RNA polymerase sigma-54 factor	390		RHE_RS07065	8	1457890	1458471	R	24299501	-	RHE_RS07065	WP_011424718.1	193	COG1432	S	NYN domain-containing protein	1361
RHE_RS29535	R	RHE_RS29535_m1	R	-272	-262	ACAGCACTGCT	15.3	1.2e-07	-15936	6921		RHE_RS06845	RHE_RS23835								RHE_RS01980	13	406672	408954	R	24297888	-	RHE_RS01980	WP_011423773.1	760	COG0745	TK	hybrid sensor histidine kinase/response regulator	377		RHE_RS07015	8	1441828	1443063	D	24300183	-	RHE_RS07015	WP_020920861.1	411	COG0523	R	GTP-binding protein	1351
RHE_RS04025	D	RHE_RS29535_m2	D	-380	-370	TTCGTCCTCGA	10.3	9.4e-06	-11575	5027		RHE_RS06860	RHE_RS23885								RHE_RS01430	13	293168	293611	D	24301601	-	RHE_RS01430	WP_042117749.1	147	COG1846	K	MarR family transcriptional regulator	272		RHE_RS06880	8	1404711	1405826	D	24299467	-	RHE_RS06880	WP_011424683.1	371	COG0673	R	gfo/Idh/MocA family oxidoreductase	1325
RHE_RS04510	R	RHE_RS29535_m2	R	-69	-59	TTCGTCCTCTA	11.5	2.9e-06	-12751	5538		RHE_RS06875	RHE_RS23945								RHE_RS32435	12	17399	18073	D	30584639	-	RHE_RS32435	WP_011053291.1	224			MULTISPECIES: transcriptional regulator	5678		RHE_RS06875	8	1403628	1404503	R	24299772	-	RHE_RS06875	WP_020920841.1	291	COG1737	K	MurR/RpiR family transcriptional regulator	1324
RHE_RS29535	R	RHE_RS29535_m2	R	-301	-291	TCCGTGCTCTC	11.6	2.4e-06	-12940	5620		RHE_RS06880	RHE_RS24090								RHE_RS32370	12	521767	522423	R	30584626	-	RHE_RS32370	WP_011428767.1	218	COG1595	K	RNA polymerase sigma factor	5550		RHE_RS06215	8	1265346	1266380	D	24299033	-	RHE_RS06215	WP_042118128.1	344	COG1609	K	LacI family DNA-binding transcriptional regulator	1192
RHE_RS18760	D	RHE_RS29535_m3	D	-198	-188	CACTATGTCCT	9.5	4.5e-06	-12311	5347		RHE_RS06895	RHE_RS24095								RHE_RS29075	12	572421	573152	D	24302828	-	RHE_RS29075	WP_011428811.1	243	COG0664	T	nitrogen fixation transcriptional regulator protein	5595		RHE_RS05315	8	1094963	1095646	R	24300376	-	RHE_RS05315	WP_042119188.1	227	COG0745	TK	DNA-binding response regulator	1022
RHE_RS28070	D	RHE_RS29535_m3	D	-122	-112	TGCTATGTCCT	8.6	9.3e-06	-11585	5032		RHE_RS06955	RHE_RS24110								RHE_RS28855	12	526765	527682	D	24302872	-	RHE_RS28855	WP_011428772.1	305	COG2207	K	AraC family transcriptional regulator	5555		RHE_RS05260	8	1087421	1087645	D	24300249	-	RHE_RS05260	WP_041678840.1	74			hypothetical protein	1011
RHE_RS03790	D	RHE_RS29400_m1	D	-153	-136	CAGAAATGCACGACCGCA	7.7	9.5e-06	-11564	5022		RHE_RS06960	RHE_RS24350								RHE_RS27460	12	207840	209642	R	24303151	-	RHE_RS27460	WP_011428506.1	600	COG2203	T	PucR family transcriptional regulator	5281		RHE_RS05195	8	1076535	1079510	D	24299571	-	RHE_RS05195	WP_042118044.1	991	COG1052	CHR	phosphoglycerate dehydrogenase	999
RHE_RS27460	R	RHE_RS29400_m1	R	-113	-96	GCGAAAAGTAGGACCGCC	12.0	4.8e-07	-14549	6319		RHE_RS07005	RHE_RS24475								RHE_RS26795	12	73511	73915	D	24303284	-	RHE_RS26795	WP_011428383.1	134	COG0784	T	response regulator	5148		RHE_RS04030	8	838153	839109	R	24299214	-	RHE_RS04030	WP_011424150.1	318	COG0583	K	LysR family transcriptional regulator	769
RHE_RS29400	D	RHE_RS29400_m1	D	-23	-6	GCGTGAGGAAGGACTGAA	15.5	3.5e-08	-17168	7456		RHE_RS07015	RHE_RS24540								RHE_RS25905	12	398760	399902	R	24302382	-	RHE_RS25905	WP_011428215.1	380	COG2207	K	AraC family transcriptional regulator	4972		RHE_RS03520	8	714467	715828	D	24298809	-	RHE_RS03520	WP_011424060.1	453	COG1653	G	carbohydrate ABC transporter substrate-binding protein	674
RHE_RS07755	R	RHE_RS29400_m2	R	-88	-70	CGTGCGGGTACAGCGAAGC	7.8	6.6e-06	-11928	5180		RHE_RS07050	RHE_RS24620								RHE_RS23325	12	102240	102866	D	24302184	-	RHE_RS23325	WP_011427722.1	208	COG4566	TK	DNA-binding response regulator	4469		RHE_RS03515	8	713141	714169	R	24297618	-	RHE_RS03515	WP_011424059.1	342	COG1609	K	LacI family transcriptional regulator	673
RHE_RS29400	D	RHE_RS29400_m2	D	-22	-4	CGTGAGGAAGGACTGAACG	13.6	1.3e-07	-15856	6886		RHE_RS07065	RHE_RS24725								RHE_RS23130	12	55707	56393	D	24302223	-	RHE_RS23130	WP_011427684.1	228	COG0745	TK	DNA-binding response regulator	4427		RHE_RS03430	8	697768	698439	D	24300610	-	RHE_RS03430	WP_011424043.1	223	COG0745	TK	DNA-binding response regulator	656
RHE_RS01815	D	RHE_RS29400_m3	D	-22	-5	GGGCGCGTGGGAGGATTT	10.8	2.2e-06	-13027	5658		RHE_RS07070	RHE_RS24735								RHE_RS22020	12	5454	6176	D	24302038	-	RHE_RS22020	WP_011427471.1	240	COG1802	K	GntR family transcriptional regulator	4215		RHE_RS02635	8	539161	539553	R	24297669	-	RHE_RS02635	WP_011423893.1	130	COG2967	P	MULTISPECIES: Co2+/Mg2+ efflux protein ApaG	502
RHE_RS02695	D	RHE_RS29400_m3	D	-139	-122	AGGGGCGTGGGAGGATGC	9.4	6.6e-06	-11928	5180		RHE_RS07075	RHE_RS24755								RHE_RS18035	12	3719211	3719471	D	24301547	-	RHE_RS18035	WP_011426750.1	86	COG0640	K	ArsR family transcriptional regulator	3469		RHE_RS02340	8	473887	474468	R	24300385	-	RHE_RS02340	WP_011423839.1	193			TetR/AcrR family transcriptional regulator	445
RHE_RS29400	D	RHE_RS29400_m4	D	-25	-11	GCGCGTGAGGAAGGA	13.3	1.6e-07	-15648	6796		RHE_RS07105	RHE_RS24760								RHE_RS17145	12	3521414	3522322	D	24301330	-	RHE_RS17145	WP_011426585.1	302	COG0583	K	LysR family transcriptional regulator	3300		RHE_RS00745	8	155282	157612	R	24298018	-	RHE_RS00745	WP_011423540.1	776	COG0744	M	penicillin-binding protein	139
RHE_RS01815	D	RHE_RS29400_m5	D	-82	-56	CCATTCCTTGCACGTCCGATCTGAAGC	1.0	5.5e-06	-12111	5260		RHE_RS07140	RHE_RS24850								RHE_RS17135	12	3519397	3520308	D	24301596	-	RHE_RS17135	WP_020922119.1	303	COG0583	K	LysR family transcriptional regulator	3298		RHE_RS00695	8	145313	146305	D	24297997	-	RHE_RS00695	WP_011423529.1	330	COG0524	G	adenosine kinase	129
RHE_RS27930	R	RHE_RS29400_m5	R	-156	-130	ACCTGCTTCACACCTACAGTGTAAATC	1.3	4.8e-06	-12247	5319		RHE_RS07205	RHE_RS24980								RHE_RS15225	12	3118119	3118412	D	24300427	-	RHE_RS15225	WP_011426219.1	97	COG0640	K	transcriptional regulator	2932		RHE_RS00410	8	86858	88006	R	24298098	-	RHE_RS00410	WP_011423477.1	382	COG0673	R	gfo/Idh/MocA family oxidoreductase	73
RHE_RS27935	D	RHE_RS29400_m5	D	-43	-17	ACCTGCTTCACACCTACAGTGTAAATC	1.3	4.8e-06	-12247	5319		RHE_RS07210	RHE_RS25040								RHE_RS10445	12	2131364	2132251	R	24299905	-	RHE_RS10445	WP_011425307.1	295	COG2207	K	AraC family transcriptional regulator	2014		RHE_RS32710	7	277387	277653	R	30584694	-	RHE_RS32710	WP_020465424.1	88			MULTISPECIES: polysaccharide repressor protein	5902
RHE_RS29400	D	RHE_RS29400_m5	D	-34	-8	TCACTCTTCGCGCGTGAGGAAGGACTG	1.3	4.8e-06	-12247	5319		RHE_RS07240	RHE_RS25060								RHE_RS07210	12	1483268	1483582	D	24301684	-	RHE_RS07210	WP_011424747.1	104	COG0640	K	ArsR family transcriptional regulator	1391		RHE_RS31305	7	364570	366963	R	27430674	-	RHE_RS31305	WP_011428631.1	797	COG2205	T	PAS domain S-box protein	5410
RHE_RS02635	R	RHE_RS29335_m1	R	-51	-28	TACCCGTATCTTATAAAGAGGCCC	9.7	6.3e-06	-11975	5201		RHE_RS07245	RHE_RS25185								RHE_RS06105	12	1244328	1245227	R	24299707	-	RHE_RS06105	WP_011424530.1	299	COG0583	K	LysR family transcriptional regulator	1170		RHE_RS30285	7	193329	193814	D	24297365	-	RHE_RS30285	WP_011053396.1	161			XRE family transcriptional regulator	5829
RHE_RS05255	R	RHE_RS29335_m1	R	-31	-8	AAATTATACCCTAAAAAAAGGTAC	9.9	4.5e-06	-12311	5347		RHE_RS07275	RHE_RS25290								RHE_RS05735	12	1173008	1173928	D	24299753	-	RHE_RS05735	WP_011424463.1	306	COG0583	K	LysR family transcriptional regulator	1099		RHE_RS29630	7	44177	45082	D	24297237	-	RHE_RS29630	WP_004674388.1	301	COG0583	K	MULTISPECIES: LysR family transcriptional regulator	5704
RHE_RS05260	D	RHE_RS29335_m1	D	-80	-57	AAATTATACCCTAAAAAAAGGTAC	9.9	4.5e-06	-12311	5347		RHE_RS07285	RHE_RS25455								RHE_RS03430	12	697768	698439	D	24300610	-	RHE_RS03430	WP_011424043.1	223	COG0745	TK	DNA-binding response regulator	656		RHE_RS29535	7	26855	27733	R	24297338	-	RHE_RS29535	WP_029875515.1	292			MULTISPECIES: response regulator	5686
RHE_RS07925	R	RHE_RS29335_m1	R	-162	-139	TGTCTATGTCATTGACAAAAGAGG	9.7	6.3e-06	-11975	5201		RHE_RS07290	RHE_RS25540								RHE_RS29400	11	635310	636548	D	24302763	-	RHE_RS29400	WP_011428870.1	412	COG1846	K	ROK family transcriptional regulator	5660		RHE_RS29075	7	572421	573152	D	24302828	-	RHE_RS29075	WP_011428811.1	243	COG0664	T	nitrogen fixation transcriptional regulator protein	5595
RHE_RS14175	D	RHE_RS29335_m1	D	-181	-158	TATTTTTAGCACTTATAAAAAAGA	10.7	1.8e-06	-13228	5745		RHE_RS07295	RHE_RS25560								RHE_RS26800	11	73942	74334	D	24303283	-	RHE_RS26800	WP_011428384.1	130	COG0784	T	response regulator	5149		RHE_RS28665	7	482316	482858	D	24302910	-	RHE_RS28665	WP_086005051.1	180			GntR family transcriptional regulator	5517
RHE_RS23695	R	RHE_RS29335_m1	R	-170	-147	TATTTAGATCACATGTACATTATA	9.9	4.5e-06	-12311	5347		RHE_RS07300	RHE_RS25595								RHE_RS26000	11	415886	416785	R	24302363	-	RHE_RS26000	WP_011428230.1	299	COG4977	K	AraC family transcriptional regulator	4990		RHE_RS28510	7	452187	452903	R	24302941	-	RHE_RS28510	WP_011428705.1	238	COG1802	K	GntR family transcriptional regulator	5488
RHE_RS03040	R	RHE_RS29335_m2	R	-86	-62	GTTCATATACGCGACGTATATCAAA	3.4	1.8e-06	-13228	5745		RHE_RS07305	RHE_RS25605								RHE_RS22030	11	7468	8115	R	24302036	-	RHE_RS22030	WP_032490474.1	215	COG1309	K	TetR/AcrR family transcriptional regulator	4217		RHE_RS28070	7	355403	356359	D	24303029	-	RHE_RS28070	WP_042120001.1	318	COG1175	G	sugar ABC transporter permease	5401
RHE_RS03180	D	RHE_RS29335_m2	D	-142	-118	GATGATATCCGCCTTGTATACCGAA	4.1	1.3e-06	-13553	5886		RHE_RS07315	RHE_RS25725								RHE_RS20110	11	4162525	4163085	D	24298118	-	RHE_RS20110	WP_011427123.1	186	COG1595	K	RNA polymerase sigma factor RpoE	3873		RHE_RS26695	7	57722	58231	R	24303304	-	RHE_RS26695	WP_086005055.1	169	COG1595	K	RNA polymerase subunit sigma-70	5129
RHE_RS20485	R	RHE_RS29335_m2	R	-245	-221	AAGTTTATGCACGTTTTATATCATT	1.7	3.8e-06	-12481	5420		RHE_RS07330	RHE_RS25835								RHE_RS18235	11	3763946	3764800	R	24299179	-	RHE_RS18235	WP_042119009.1	284	COG0583	K	LysR family transcriptional regulator	3509		RHE_RS26610	7	39525	40352	R	24303321	-	RHE_RS26610	WP_011428350.1	275	COG0287	E	semialdehyde dehydrogenase	5112
RHE_RS20490	D	RHE_RS29335_m2	D	-49	-25	AAGTTTATGCACGTTTTATATCATT	1.7	3.8e-06	-12481	5420		RHE_RS07350	RHE_RS25840								RHE_RS17450	11	3590784	3591827	D	24299449	-	RHE_RS17450	WP_011426640.1	347	COG1609	K	LacI family transcriptional regulator	3353		RHE_RS26355	7	492450	493478	D	24302292	-	RHE_RS26355	WP_011428300.1	342	COG1879	G	MULTISPECIES: LacI family DNA-binding transcriptional regulator	5062
RHE_RS24620	D	RHE_RS29335_m2	D	-179	-155	AAAAATATGCATAGCCTATAAAATT	2.3	3.0e-06	-12717	5523		RHE_RS07365	RHE_RS25905								RHE_RS17170	11	3526070	3526534	R	24297922	-	RHE_RS17170	WP_011426590.1	154	COG1846	K	MarR family transcriptional regulator	3305		RHE_RS26290	7	479091	479495	D	24302305	-	RHE_RS26290	WP_011428287.1	134	COG1476	K	MULTISPECIES: XRE family transcriptional regulator	5049
RHE_RS29335	R	RHE_RS29335_m2	R	-43	-19	TATGATATCGGCAGTATATATCATC	21.8	3.3e-11	-24135	10481		RHE_RS07380	RHE_RS25970								RHE_RS16135	11	3308142	3309131	D	24298485	-	RHE_RS16135	WP_011426389.1	329	COG2207	K	AraC family transcriptional regulator	3104		RHE_RS24565	7	122632	123675	R	24302650	-	RHE_RS24565	WP_011427964.1	347	COG2227	H	class I SAM-dependent methyltransferase	4713
RHE_RS30975	R	RHE_RS29335_m2	R	-109	-85	ACTGGTATAAGCTGGTGAAATCATT	2.3	3.0e-06	-12717	5523		RHE_RS07480	RHE_RS26000								RHE_RS15675	11	3205673	3206182	D	24301290	-	RHE_RS15675	WP_011426302.1	169	COG1595	K	RNA polymerase sigma factor	3016		RHE_RS24400	7	85871	87133	R	24302683	-	RHE_RS24400	WP_011427931.1	420	COG1228	Q	imidazolonepropionase	4679
RHE_RS08150	R	RHE_RS29335_m3	R	-31	-16	GGTGATGAAAGATATT	10.2	5.6e-06	-12093	5252		RHE_RS07510	RHE_RS26015								RHE_RS13215	11	2692971	2693621	R	24298427	-	RHE_RS13215	WP_011425833.1	216	COG1309	K	TetR/AcrR family transcriptional regulator	2547		RHE_RS23885	7	219461	220372	D	24302072	-	RHE_RS23885	WP_042119776.1	303	COG0583	K	LysR family transcriptional regulator	4578
RHE_RS16565	D	RHE_RS29335_m3	D	-98	-83	AGCGATCTTCGATATT	9.8	7.8e-06	-11761	5108		RHE_RS07590	RHE_RS26040								RHE_RS13190	11	2689288	2689809	R	24301479	-	RHE_RS13190	WP_011425830.1	173	COG1733	K	transcriptional regulator	2544		RHE_RS23835	7	208706	209776	R	24302082	-	RHE_RS23835	WP_042119774.1	356	COG1609	K	LacI family transcriptional regulator	4568
RHE_RS16870	D	RHE_RS29335_m3	D	-111	-96	AATGATGTGTGATACC	9.6	9.2e-06	-11596	5036		RHE_RS07595	RHE_RS26070								RHE_RS10640	11	2171429	2172043	D	24298640	-	RHE_RS10640	WP_011425345.1	204	COG1802	K	GntR family transcriptional regulator	2054		RHE_RS23665	7	174813	175247	R	24302116	-	RHE_RS23665	WP_041678964.1	144	COG1846	K	MarR family transcriptional regulator	4534
RHE_RS20320	R	RHE_RS29335_m3	R	-50	-35	GGCGATGATCTATATA	10.3	5.1e-06	-12186	5292		RHE_RS07645	RHE_RS26115								RHE_RS07480	11	1538983	1539567	R	24297891	-	RHE_RS07480	WP_011424799.1	194	COG1309	K	TetR/AcrR family transcriptional regulator	1446		RHE_RS23570	7	155763	156527	D	24302135	-	RHE_RS23570	WP_011427770.1	254	COG1028	IQR	KR domain-containing protein	4514
RHE_RS23570	D	RHE_RS29335_m3	D	-100	-85	ATCGATAACATATAAT	9.7	8.5e-06	-11675	5071		RHE_RS07670	RHE_RS26280								RHE_RS06825	11	1392332	1393198	R	24297694	-	RHE_RS06825	WP_011424674.1	288	COG0583	K	LysR family transcriptional regulator	1314		RHE_RS22735	7	158807	159838	R	24301895	-	RHE_RS22735	WP_011427606.1	343	COG0111	HR	2-hydroxyacid dehydrogenase	4351
RHE_RS29335	R	RHE_RS29335_m3	R	-27	-12	TCCGATATATGATATC	13.9	5.0e-08	-16811	7301		RHE_RS07685	RHE_RS26290								RHE_RS04645	11	973394	974497	D	24298582	-	RHE_RS04645	WP_041678830.1	367	COG2771	K	helix-turn-helix transcriptional regulator	891		RHE_RS20175	7	4175169	4175816	D	24297743	ccmA	RHE_RS20175	WP_011427136.1	215	COG4133	O	cytochrome c biogenesis ATP-binding export protein CcmA	3886
RHE_RS03040	R	RHE_RS29335_m4	R	-86	-62	GTTCATATACGCGACGTATATCAAA	9.3	1.8e-07	-15530	6745		RHE_RS07690	RHE_RS26355								RHE_RS01720	11	350268	350945	R	24299399	-	RHE_RS01720	WP_011423724.1	225	COG2186	K	FadR family transcriptional regulator	325		RHE_RS19750	7	4092469	4092810	R	24297970	-	RHE_RS19750	WP_011427056.1	113	COG0640	K	ArsR family transcriptional regulator	3801
RHE_RS03180	D	RHE_RS29335_m4	D	-142	-118	GATGATATCCGCCTTGTATACCGAA	6.6	8.0e-07	-14039	6097		RHE_RS07750	RHE_RS26465								RHE_RS01475	11	298903	299799	D	24301030	-	RHE_RS01475	WP_011423675.1	298	COG0583	K	LysR family transcriptional regulator	279		RHE_RS19035	7	3946135	3947643	D	24300470	-	RHE_RS19035	WP_011426932.1	502	COG1012	C	aldehyde dehydrogenase family protein	3667
RHE_RS20485	R	RHE_RS29335_m4	R	-245	-221	AAGTTTATGCACGTTTTATATCATT	3.6	3.4e-06	-12592	5469		RHE_RS07755	RHE_RS26495								RHE_RS30470	10	231727	232443	D	24297380	-	RHE_RS30470	WP_011053428.1	238	COG0664	T	Crp/Fnr family transcriptional regulator	5862		RHE_RS19030	7	3945009	3945968	D	24300473	-	RHE_RS19030	WP_011426931.1	319	COG3284	K	sigma-54-dependent Fis family transcriptional regulator	3666
RHE_RS20490	D	RHE_RS29335_m4	D	-49	-25	AAGTTTATGCACGTTTTATATCATT	3.6	3.4e-06	-12592	5469		RHE_RS07760	RHE_RS26635								RHE_RS30095	10	151474	152439	D	24297343	-	RHE_RS30095	WP_008534397.1	321	COG2207	K	MULTISPECIES: AraC family transcriptional regulator	5794		RHE_RS18865	7	3908795	3909403	R	24297634	-	RHE_RS18865	WP_011426901.1	202	COG1309	K	TetR/AcrR family transcriptional regulator	3634
RHE_RS24620	D	RHE_RS29335_m4	D	-179	-155	AAAAATATGCATAGCCTATAAAATT	5.4	1.4e-06	-13479	5854		RHE_RS07800	RHE_RS26680								RHE_RS29840	10	93689	94369	D	24297393	-	RHE_RS29840	WP_004668612.1	226	COG1802	K	MULTISPECIES: GntR family transcriptional regulator	5746		RHE_RS18475	7	3822014	3823162	R	24299842	-	RHE_RS18475	WP_042119023.1	382	COG3288	C	Re/Si-specific NAD(P)(+) transhydrogenase subunit alpha	3557
RHE_RS29335	R	RHE_RS29335_m4	R	-43	-19	TATGATATCGGCAGTATATATCATC	21.7	3.9e-11	-23967	10409		RHE_RS07830	RHE_RS26695								RHE_RS28625	10	475398	476108	D	24302918	-	RHE_RS28625	WP_011428727.1	236	COG1595	K	RNA polymerase sigma factor	5511		RHE_RS17770	7	3664279	3664788	D	24300584	-	RHE_RS17770	WP_011426701.1	169	COG0817	L	MULTISPECIES: crossover junction endodeoxyribonuclease RuvC	3417
RHE_RS30975	R	RHE_RS29335_m4	R	-109	-85	ACTGGTATAAGCTGGTGAAATCATT	2.0	6.6e-06	-11928	5180		RHE_RS07835	RHE_RS26720								RHE_RS28510	10	452187	452903	R	24302941	-	RHE_RS28510	WP_011428705.1	238	COG1802	K	GntR family transcriptional regulator	5488		RHE_RS17765	7	3661721	3664036	R	24300868	-	RHE_RS17765	WP_011426700.1	771	COG0840	NT	methyl-accepting chemotaxis protein	3416
RHE_RS01550	R	RHE_RS29335_m5	R	-127	-104	TACAGTATGTAACATTTGTGAGAG	8.2	8.8e-06	-11641	5056		RHE_RS07925	RHE_RS26765								RHE_RS28450	10	439096	439983	R	24302953	-	RHE_RS28450	WP_011428693.1	295	COG0583	K	LysR family transcriptional regulator	5476		RHE_RS17660	7	3640175	3641014	R	24301610	-	RHE_RS17660	WP_011426681.1	279	COG3637	M	porin family protein	3394
RHE_RS04420	R	RHE_RS29335_m5	R	-91	-68	AACAAGAAAAATCATCCCTGATGT	9.6	3.2e-06	-12652	5495		RHE_RS07975	RHE_RS26790								RHE_RS27570	10	233212	233445	R	24303129	-	RHE_RS27570	WP_011428527.1	77	COG2002	KV	AbrB family transcriptional regulator	5302		RHE_RS17095	7	3505653	3508139	R	24301540	-	RHE_RS17095	WP_011426575.1	828	COG5373	S	membrane protein	3290
RHE_RS06560	D	RHE_RS29335_m5	D	-303	-280	GCCAGTATCTATCTGCGCTGCTGT	9.1	4.6e-06	-12289	5337		RHE_RS08025	RHE_RS26795								RHE_RS27050	10	125727	126500	D	24303233	-	RHE_RS27050	WP_011428428.1	257	COG0664	T	Crp/Fnr family transcriptional regulator	5197		RHE_RS16700	7	3428278	3428685	R	24300162	-	RHE_RS16700	WP_011426498.1	135			DUF2325 domain-containing protein	3213
RHE_RS20320	R	RHE_RS29335_m5	R	-65	-42	ATCTATATAGATCACATCTGAGGC	8.6	6.6e-06	-11928	5180		RHE_RS08035	RHE_RS26800								RHE_RS26040	10	422939	423802	D	24302355	-	RHE_RS26040	WP_042119901.1	287	COG1737	K	MULTISPECIES: MurR/RpiR family transcriptional regulator	4998		RHE_RS16415	7	3370721	3371146	R	24301505	-	RHE_RS16415	WP_011426443.1	141	COG1396	K	XRE family transcriptional regulator	3157
RHE_RS29335	R	RHE_RS29335_m5	R	-51	-28	GGCAGTATATATCATCGCTAGCGG	17.3	3.0e-09	-19625	8523		RHE_RS08055	RHE_RS26840								RHE_RS25290	10	272834	273556	D	24302505	-	RHE_RS25290	WP_011428097.1	240	COG2186	K	FadR family transcriptional regulator	4851		RHE_RS16235	7	3331104	3332144	D	24298910	xylF	RHE_RS16235	WP_011426408.1	346	COG4213	G	D-xylose ABC transporter substrate-binding protein	3124
RHE_RS29200	R	RHE_RS29205_m1	R	-220	-191	TGGGCGCAGTTGCAACCCTGGACCGCTAAG	13.5	9.1e-08	-16212	7041		RHE_RS08065	RHE_RS26875								RHE_RS24850	10	188188	189024	D	24302593	-	RHE_RS24850	WP_011428015.1	278	COG1917	R	AraC family transcriptional regulator	4768		RHE_RS16230	7	3329555	3330778	R	24299188	-	RHE_RS16230	WP_011426407.1	407	COG1846	K	ROK family transcriptional regulator	3123
RHE_RS29205	D	RHE_RS29205_m1	D	-55	-26	TGGGCGCAGTTGCAACCCTGGACCGCTAAG	13.5	9.1e-08	-16212	7041		RHE_RS08080	RHE_RS27050								RHE_RS24760	10	170016	170915	D	24302611	-	RHE_RS24760	WP_011428000.1	299	COG0583	K	LysR family transcriptional regulator	4752		RHE_RS15925	7	3261738	3262313	D	24301339	-	RHE_RS15925	WP_011426350.1	191	COG1695	K	PadR family transcriptional regulator	3063
RHE_RS25865	D	RHE_RS29205_m2	D	-177	-163	AATCTGTAGACAATA	11.3	1.8e-06	-13228	5745		RHE_RS08085	RHE_RS27185								RHE_RS24755	10	169034	169897	R	24302612	-	RHE_RS24755	WP_011427999.1	287	COG0702	R	NmrA family transcriptional regulator	4751		RHE_RS15695	7	3210802	3211386	R	24300777	-	RHE_RS15695	WP_011426306.1	194	COG0740	O	MULTISPECIES: ATP-dependent Clp protease proteolytic subunit	3020
RHE_RS29200	R	RHE_RS29205_m2	R	-27	-13	TCTCTCTTGCCAAAG	10.3	4.9e-06	-12226	5310		RHE_RS08090	RHE_RS27195								RHE_RS22770	10	167203	168123	D	24301888	-	RHE_RS22770	WP_041678940.1	306	COG2169	L	AraC family transcriptional regulator	4358		RHE_RS14875	7	3045950	3046660	D	24301275	-	RHE_RS14875	WP_011426154.1	236	COG1802	K	GntR family transcriptional regulator	2863
RHE_RS29205	D	RHE_RS29205_m2	D	-233	-219	TCTCTCTTGCCAAAG	10.3	4.9e-06	-12226	5310		RHE_RS08130	RHE_RS27240								RHE_RS15040	10	3070065	3070784	R	24301244	-	RHE_RS15040	WP_011426183.1	239	COG0664	T	Crp/Fnr family transcriptional regulator	2895		RHE_RS14540	7	2967938	2968864	R	24300247	-	RHE_RS14540	WP_011426088.1	308	COG1181	MR	D-alanine--D-alanine ligase	2796
RHE_RS00670	D	RHE_RS29205_m3	D	-38	-29	AGGAGAGATT	10.0	7.3e-06	-11828	5137		RHE_RS08150	RHE_RS27280								RHE_RS14770	10	3021343	3022215	D	24298970	-	RHE_RS14770	WP_020921822.1	290	COG1737	K	MurR/RpiR family transcriptional regulator	2842		RHE_RS14185	7	2888347	2889273	R	24298136	-	RHE_RS14185	WP_042118741.1	308	COG0583	K	LysR family transcriptional regulator	2729
RHE_RS06215	D	RHE_RS29205_m3	D	-145	-136	ATGAGAGAGC	10.4	4.8e-06	-12247	5319		RHE_RS08160	RHE_RS27310								RHE_RS10960	10	2243950	2244699	R	24297483	-	RHE_RS10960	WP_073990381.1	249			GntR family transcriptional regulator	2118		RHE_RS14165	7	2884046	2884954	D	24300945	-	RHE_RS14165	WP_011426014.1	302	COG0702	R	SDR family NAD(P)-dependent oxidoreductase	2725
RHE_RS07065	R	RHE_RS29205_m3	R	-124	-115	AAGAGAGATT	10.1	6.2e-06	-11991	5208		RHE_RS08205	RHE_RS27415								RHE_RS10485	10	2139378	2140328	D	24299247	-	RHE_RS10485	WP_011425315.1	316	COG0583	K	MULTISPECIES: LysR family transcriptional regulator	2022		RHE_RS14160	7	2883507	2883923	R	24300946	-	RHE_RS14160	WP_011426013.1	138	COG1733	K	transcriptional regulator	2724
RHE_RS07070	D	RHE_RS29205_m3	D	-188	-179	AAGAGAGATT	10.1	6.2e-06	-11991	5208		RHE_RS08215	RHE_RS27460								RHE_RS09445	10	1938515	1939174	D	24297790	-	RHE_RS09445	WP_042118314.1	219	COG1309	K	TetR/AcrR family transcriptional regulator	1822		RHE_RS12545	7	2564613	2565644	R	24297866	-	RHE_RS12545	WP_011425710.1	343	COG0667	R	glyceraldehyde 3-phosphate reductase	2421
RHE_RS12525	R	RHE_RS29205_m3	R	-29	-20	ATGAGAGAGC	10.4	4.8e-06	-12247	5319		RHE_RS08240	RHE_RS27470								RHE_RS09080	10	1862137	1862796	D	24298071	-	RHE_RS09080	WP_011425068.1	219	COG3806	T	transcriptional regulator	1749		RHE_RS12415	7	2540212	2540535	R	24300307	-	RHE_RS12415	WP_011425688.1	107	COG0640	K	MULTISPECIES: transcriptional regulator	2398
RHE_RS15875	D	RHE_RS29205_m3	D	-16	-7	TTGAGAGAGT	10.3	5.3e-06	-12148	5276		RHE_RS08260	RHE_RS27525								RHE_RS09015	10	1849974	1850549	D	24300362	-	RHE_RS09015	WP_011425055.1	191	COG1309	K	TetR/AcrR family transcriptional regulator	1737		RHE_RS11265	7	2308089	2309051	D	24300752	-	RHE_RS11265	WP_011425465.1	320	COG1752	R	MULTISPECIES: phosphoesterase	2176
RHE_RS23450	R	RHE_RS29205_m3	R	-164	-155	AGGAGAGAGT	10.4	4.8e-06	-12247	5319		RHE_RS08300	RHE_RS27560								RHE_RS05380	10	1107313	1107603	D	24298126	-	RHE_RS05380	WP_011424398.1	96			CopG family transcriptional regulator	1033		RHE_RS11255	7	2306882	2307496	D	24300755	folE	RHE_RS11255	WP_011425463.1	204	COG0302	H	GTP cyclohydrolase I FolE	2174
RHE_RS08065	R	RHE_RS29205_m4	R	-135	-110	GTAGGTCCCGACAGCTTCTGGAAGGG	10.3	2.1e-06	-13074	5678		RHE_RS08320	RHE_RS27570								RHE_RS05265	10	1087781	1088035	D	24298606	-	RHE_RS05265	WP_041678841.1	84			DNA-directed RNA polymerase sigma-70 factor	1012		RHE_RS11250	7	2306125	2306571	R	24298026	-	RHE_RS11250	WP_011425462.1	148	COG0822	O	iron-sulfur cluster assembly scaffold protein	2173
RHE_RS10795	D	RHE_RS29205_m4	D	-60	-35	TAAGGTGCGCCGATCGATTGAAACGC	9.0	6.0e-06	-12024	5222		RHE_RS08350	RHE_RS27600								RHE_RS01740	10	354643	355554	D	24298621	-	RHE_RS01740	WP_011423728.1	303	COG0583	K	LysR family transcriptional regulator	329		RHE_RS10540	7	2150739	2151713	R	24297652	-	RHE_RS10540	WP_011425326.1	324	COG1312	G	mannonate dehydratase	2034
RHE_RS29200	R	RHE_RS29205_m4	R	-62	-37	TCAGGGACCGCTGACCTCAAGAACGC	15.8	1.3e-08	-18158	7886		RHE_RS08385	RHE_RS27645								RHE_RS32555	9	110017	111051	R	30584663	-	RHE_RS32555	WP_008534360.1	344	COG2207	K	MULTISPECIES: AraC family transcriptional regulator	5761		RHE_RS10425	7	2128648	2129160	D	24300520	-	RHE_RS10425	WP_011425303.1	170	COG1846	K	MarR family transcriptional regulator	2010
RHE_RS29205	D	RHE_RS29205_m4	D	-209	-184	TCAGGGACCGCTGACCTCAAGAACGC	15.8	1.3e-08	-18158	7886		RHE_RS08405	RHE_RS27750								RHE_RS31500	9	1259117	1259404	R	30584452	-	RHE_RS31500	WP_011424546.1	95			MurR/RpiR family transcriptional regulator	1186		RHE_RS09835	7	2007997	2009286	R	24297515	gltA	RHE_RS09835	WP_008526864.1	429	COG0372	C	MULTISPECIES: citrate (Si)-synthase	1893
RHE_RS01315	D	RHE_RS29205_m5	D	-173	-150	CCTGTTGTTTTGACCTATAAAACA	10.5	2.7e-06	-12822	5569		RHE_RS08410	RHE_RS27845								RHE_RS28665	9	482316	482858	D	24302910	-	RHE_RS28665	WP_086005051.1	180			GntR family transcriptional regulator	5517		RHE_RS09790	7	1998257	1999000	D	24299945	-	RHE_RS09790	WP_042118361.1	247	COG0020	I	isoprenyl transferase	1884
RHE_RS18535	D	RHE_RS29205_m5	D	-120	-97	TGTGATCTTATAACATATAAAATC	10.5	2.7e-06	-12822	5569		RHE_RS08430	RHE_RS27920								RHE_RS27310	9	178626	179273	R	24303181	-	RHE_RS27310	WP_011428477.1	215	COG1309	K	TetR/AcrR family transcriptional regulator	5253		RHE_RS09730	7	1986915	1987286	D	24298623	-	RHE_RS09730	WP_011425186.1	123	COG5490	S	hypothetical protein	1872
RHE_RS23365	R	RHE_RS29205_m5	R	-116	-93	TCTGGTAAACAAGAAAATGAAACG	10.8	2.1e-06	-13074	5678		RHE_RS08455	RHE_RS27925								RHE_RS26875	9	87772	88770	R	24303268	-	RHE_RS26875	WP_073990435.1	332	COG1609	K	LacI family DNA-binding transcriptional regulator	5164		RHE_RS09595	7	1962323	1963648	D	24299288	-	RHE_RS09595	WP_011425165.1	441	COG0460	E	homoserine dehydrogenase	1849
RHE_RS23370	D	RHE_RS29205_m5	D	-249	-226	TCTGGTAAACAAGAAAATGAAACG	10.8	2.1e-06	-13074	5678		RHE_RS08525	RHE_RS27930								RHE_RS26355	9	492450	493478	D	24302292	-	RHE_RS26355	WP_011428300.1	342	COG1879	G	MULTISPECIES: LacI family DNA-binding transcriptional regulator	5062		RHE_RS09045	7	1856155	1856616	R	24301418	-	RHE_RS09045	WP_011425061.1	153	COG1522	K	Lrp/AsnC family transcriptional regulator	1742
RHE_RS19250	R	RHE_RS29200_m1	R	-168	-159	TTTCAGGATA	10.0	1.1e-06	-13720	5959		RHE_RS08535	RHE_RS27935								RHE_RS25835	9	382223	382942	D	24302396	-	RHE_RS25835	WP_042119925.1	239	COG2186	K	FadR family transcriptional regulator	4958		RHE_RS07835	7	1613145	1613492	R	24297649	-	RHE_RS07835	WP_011424866.1	115	COG0784	T	response regulator	1517
RHE_RS25905	R	RHE_RS29200_m1	R	-82	-73	TTTCAGGATG	9.4	5.1e-06	-12186	5292		RHE_RS08540	RHE_RS28010								RHE_RS25560	9	330344	331213	D	24302451	-	RHE_RS25560	WP_011428148.1	289	COG1595	K	DNA-directed RNA polymerase sigma-70 factor	4903		RHE_RS07760	7	1601297	1602193	R	24299800	-	RHE_RS07760	WP_011424852.1	298			glucosyltransferase	1502
RHE_RS29200	R	RHE_RS29200_m1	R	-112	-103	TTTCAGGATA	10.0	1.1e-06	-13720	5959		RHE_RS08550	RHE_RS28020								RHE_RS23540	9	148583	149104	D	24302141	-	RHE_RS23540	WP_011427764.1	173	COG1595	K	RNA polymerase sigma factor	4508		RHE_RS07690	7	1583995	1585296	D	24299928	-	RHE_RS07690	WP_011424839.1	433	COG2989	M	amidase	1488
RHE_RS29205	D	RHE_RS29200_m1	D	-143	-134	TTTCAGGATA	10.0	1.1e-06	-13720	5959		RHE_RS08560	RHE_RS28045								RHE_RS23470	9	130057	131046	R	24302155	-	RHE_RS23470	WP_011427750.1	329	COG4977	K	GlxA family transcriptional regulator	4494		RHE_RS07070	7	1458770	1459174	D	24299500	-	RHE_RS07070	WP_011424719.1	134	COG1758	K	MULTISPECIES: DNA-directed RNA polymerase subunit omega	1362
RHE_RS17020	D	RHE_RS29200_m2	D	-373	-356	TTCTGACACAGTTTGAGG	11.1	1.7e-06	-13285	5770		RHE_RS08570	RHE_RS28220								RHE_RS22955	9	18010	18705	D	24302258	-	RHE_RS22955	WP_011427648.1	231	COG1802	K	MULTISPECIES: GntR family transcriptional regulator	4393		RHE_RS06895	7	1408070	1409092	D	24300467	-	RHE_RS06895	WP_011424685.1	340	COG3203	M	porin	1327
RHE_RS01700	R	RHE_RS29200_m3	R	-172	-157	TTAGGACTAAAGTCCC	10.7	1.7e-06	-13285	5770		RHE_RS08630	RHE_RS28305								RHE_RS14055	9	2858890	2859540	R	24297841	-	RHE_RS14055	WP_039620788.1	216	COG1309	K	MULTISPECIES: TetR/AcrR family transcriptional regulator	2704		RHE_RS06655	7	1354654	1354845	R	24297902	-	RHE_RS06655	WP_011424640.1	63			hypothetical protein	1279
RHE_RS03290	R	RHE_RS29200_m3	R	-170	-155	GAAGGGTAGTCGTCTG	10.0	5.7e-06	-12075	5244		RHE_RS08660	RHE_RS28340								RHE_RS12205	9	2500863	2501330	D	24297934	-	RHE_RS12205	WP_011425648.1	155	COG1846	K	MarR family transcriptional regulator	2360		RHE_RS05855	7	1198302	1199054	R	24300908	-	RHE_RS05855	WP_020920707.1	250	COG1349	KG	DeoR/GlpR transcriptional regulator	1122
RHE_RS29170	D	RHE_RS29200_m3	D	-163	-148	GCAGGACAGCAGTCGT	10.1	4.9e-06	-12226	5310		RHE_RS08675	RHE_RS28370								RHE_RS11075	9	2270894	2271589	D	24299851	-	RHE_RS11075	WP_011425429.1	231	COG1309	K	TetR family transcriptional regulator	2139		RHE_RS04950	7	1028221	1029645	R	24301332	-	RHE_RS04950	WP_011424326.1	474	COG0498	E	threonine synthase	950
RHE_RS00300	R	RHE_RS29200_m4	R	-346	-322	GCGACGAAGTCTCTCGCTCTGAAGA	9.8	8.8e-06	-11641	5056		RHE_RS08685	RHE_RS28450								RHE_RS08760	9	1793825	1794712	D	24298672	-	RHE_RS08760	WP_011425005.1	295	COG0583	K	LysR family transcriptional regulator	1688		RHE_RS04645	7	973394	974497	D	24298582	-	RHE_RS04645	WP_041678830.1	367	COG2771	K	helix-turn-helix transcriptional regulator	891
RHE_RS27970	D	RHE_RS29200_m4	D	-114	-90	GAGACGAATGTCAAGTATATGAAAT	10.9	2.6e-06	-12860	5585		RHE_RS08700	RHE_RS28510								RHE_RS06705	9	1367619	1368092	D	24298374	-	RHE_RS06705	WP_042119214.1	157	COG1522	K	MULTISPECIES: Lrp/AsnC family transcriptional regulator	1289		RHE_RS04435	7	921168	922124	D	24298100	-	RHE_RS04435	WP_011424229.1	318	COG0752	J	MULTISPECIES: glycine--tRNA ligase subunit alpha	849
RHE_RS28655	R	RHE_RS29200_m4	R	-193	-169	GCGTCGCCACCTTTGGTAAAGAAAC	10.1	7.1e-06	-11855	5149		RHE_RS08760	RHE_RS28545								RHE_RS06465	9	1315120	1315680	R	24299049	-	RHE_RS06465	WP_011424602.1	186	COG1309	K	TetR family transcriptional regulator	1242		RHE_RS04310	7	897493	898287	D	24300904	-	RHE_RS04310	WP_011424205.1	264	COG1414	K	IclR family transcriptional regulator	825
RHE_RS06235	R	RHE_RS29200_m5	R	-115	-102	TACAGGTACAGCCA	10.6	1.9e-06	-13174	5721		RHE_RS08765	RHE_RS28555								RHE_RS05215	9	1082632	1083027	R	24299481	-	RHE_RS05215	WP_011424372.1	131	COG1733	K	transcriptional regulator	1003		RHE_RS04150	7	863970	864407	R	24297835	-	RHE_RS04150	WP_011424174.1	145	COG2259	S	DoxX family protein	793
RHE_RS06240	D	RHE_RS29200_m5	D	-182	-169	TACAGGTACAGCCA	10.6	1.9e-06	-13174	5721		RHE_RS08785	RHE_RS28625								RHE_RS03275	9	669101	669847	D	24300699	-	RHE_RS03275	WP_042117883.1	248	COG2771	K	LuxR family transcriptional regulator	625		RHE_RS02610	7	534694	535893	D	24300993	-	RHE_RS02610	WP_011423889.1	399	COG4992	E	acetylornithine transaminase	498
RHE_RS12580	R	RHE_RS29195_m1	R	-354	-340	TGTATCGTTACAGAT	11.7	1.2e-06	-13633	5921		RHE_RS08915	RHE_RS28665								RHE_RS27750	8	274051	275121	D	24303093	-	RHE_RS27750	WP_011428563.1	356	COG1609	K	LacI family transcriptional regulator	5337		RHE_RS00760	7	160833	163220	D	24301282	-	RHE_RS00760	WP_011423543.1	795	COG3300	T	PAS domain S-box protein	142
RHE_RS12585	D	RHE_RS29195_m1	D	-117	-103	TGTATCGTTACAGAT	11.7	1.2e-06	-13633	5921		RHE_RS08920	RHE_RS28695								RHE_RS27470	8	210637	211134	D	24303149	-	RHE_RS27470	WP_011428508.1	165	COG1522	K	Lrp/AsnC family transcriptional regulator	5283		RHE_RS32555	6	110017	111051	R	30584663	-	RHE_RS32555	WP_008534360.1	344	COG2207	K	MULTISPECIES: AraC family transcriptional regulator	5761
RHE_RS14275	D	RHE_RS29195_m1	D	-214	-200	CGGATGGTTACACCA	12.7	3.7e-07	-14810	6432		RHE_RS08925	RHE_RS28710								RHE_RS26635	8	44455	45159	D	24303316	-	RHE_RS26635	WP_011428354.1	234	COG2186	K	MULTISPECIES: transcriptional regulator NanR	5117		RHE_RS32435	6	17399	18073	D	30584639	-	RHE_RS32435	WP_011053291.1	224			MULTISPECIES: transcriptional regulator	5678
RHE_RS29195	D	RHE_RS29195_m1	D	-88	-74	TGGCTGGTGACACCA	13.7	1.1e-07	-16023	6959		RHE_RS08965	RHE_RS28725								RHE_RS23885	8	219461	220372	D	24302072	-	RHE_RS23885	WP_042119776.1	303	COG0583	K	LysR family transcriptional regulator	4578		RHE_RS32370	6	521767	522423	R	30584626	-	RHE_RS32370	WP_011428767.1	218	COG1595	K	RNA polymerase sigma factor	5550
RHE_RS04090	R	RHE_RS29195_m2	R	-46	-16	TATTGCAAATATGTCGACTCTTAGGCACCAG	7.7	6.1e-06	-12007	5215		RHE_RS08970	RHE_RS28855								RHE_RS23065	8	40175	40879	D	24302236	-	RHE_RS23065	WP_011427670.1	234	COG1802	K	GntR family transcriptional regulator	4416		RHE_RS30470	6	231727	232443	D	24297380	-	RHE_RS30470	WP_011053428.1	238	COG0664	T	Crp/Fnr family transcriptional regulator	5862
RHE_RS04570	R	RHE_RS29195_m2	R	-73	-43	TGTTACTATCTTTTCGATATCGTGTCACTAT	8.3	4.1e-06	-12405	5387		RHE_RS08995	RHE_RS28890								RHE_RS18340	8	3783396	3784073	D	24298546	-	RHE_RS18340	WP_011426802.1	225	COG0745	TK	DNA-binding response regulator	3530		RHE_RS29205	6	598951	599604	D	24302802	-	RHE_RS29205	WP_011428836.1	217	COG4566	TK	DNA-binding response regulator	5621
RHE_RS04575	D	RHE_RS29195_m2	D	-47	-17	TGTTACTATCTTTTCGATATCGTGTCACTAT	8.3	4.1e-06	-12405	5387		RHE_RS09015	RHE_RS29075								RHE_RS12620	8	2582103	2582894	D	24300665	-	RHE_RS12620	WP_042118605.1	263	COG2207	K	AraC family transcriptional regulator	2435		RHE_RS29200	6	595866	598709	R	24302803	-	RHE_RS29200	WP_042120030.1	947	COG3710	K	LuxR family transcriptional regulator	5620
RHE_RS28420	R	RHE_RS29195_m2	R	-281	-251	TTGACCATGATTGTACATTTGGTATGACCAG	7.4	7.3e-06	-11828	5137		RHE_RS09020	RHE_RS29080								RHE_RS12415	8	2540212	2540535	R	24300307	-	RHE_RS12415	WP_011425688.1	107	COG0640	K	MULTISPECIES: transcriptional regulator	2398		RHE_RS29170	6	590443	591588	D	24302809	nirK	RHE_RS29170	WP_011428828.1	381	COG2132	DPM	nitrite reductase, copper-containing	5614
RHE_RS28425	D	RHE_RS29195_m2	D	-91	-61	TTGACCATGATTGTACATTTGGTATGACCAG	7.4	7.3e-06	-11828	5137		RHE_RS09025	RHE_RS29195								RHE_RS06555	8	1328613	1329173	D	24301122	-	RHE_RS06555	WP_011424620.1	186	COG1309	K	TetR/AcrR family transcriptional regulator	1259		RHE_RS28655	6	480069	480908	R	24302912	-	RHE_RS28655	WP_042120059.1	279			hypothetical protein	5516
RHE_RS28780	D	RHE_RS29195_m2	D	-209	-179	TGTTACTTCCCCTTCTCTGAGTTGGCACGCG	8.3	4.1e-06	-12405	5387		RHE_RS09045	RHE_RS29200								RHE_RS05000	8	1038395	1039291	D	24297850	-	RHE_RS05000	WP_011424335.1	298	COG0583	K	LysR family transcriptional regulator	959		RHE_RS28025	6	345603	346616	D	24303038	-	RHE_RS28025	WP_011428614.1	337	COG0715	P	nitrate ABC transporter substrate-binding protein	5392
RHE_RS01870	R	RHE_RS29195_m3	R	-41	-28	AGCCAGCTAGTAGG	10.5	3.2e-06	-12652	5495		RHE_RS09080	RHE_RS29205								RHE_RS30790	7	293084	294022	D	24297207	-	RHE_RS30790	WP_029532439.1	312	COG0583	K	MULTISPECIES: LysR family transcriptional regulator	5919		RHE_RS27935	6	322860	324011	D	24303056	-	RHE_RS27935	WP_011428597.1	383	COG1846	K	ROK family transcriptional regulator	5375
RHE_RS05945	R	RHE_RS29195_m3	R	-187	-174	TAACAGACAGTAAA	9.4	7.8e-06	-11761	5108		RHE_RS09130	RHE_RS29335								RHE_RS29630	7	44177	45082	D	24297237	-	RHE_RS29630	WP_004674388.1	301	COG0583	K	MULTISPECIES: LysR family transcriptional regulator	5704		RHE_RS27930	6	321663	322691	R	24303057	-	RHE_RS27930	WP_041679322.1	342	COG4977	K	AraC family transcriptional regulator	5374
RHE_RS05950	D	RHE_RS29195_m3	D	-288	-275	TAACAGACAGTAAA	9.4	7.8e-06	-11761	5108		RHE_RS09160	RHE_RS29400								RHE_RS29535	7	26855	27733	R	24297338	-	RHE_RS29535	WP_029875515.1	292			MULTISPECIES: response regulator	5686		RHE_RS27600	6	240133	240486	D	24303123	-	RHE_RS27600	WP_011428533.1	117	COG0640	K	ArsR family transcriptional regulator	5307
RHE_RS29170	D	RHE_RS29195_m3	D	-105	-92	AAACAGCCAGTTTG	9.3	8.5e-06	-11675	5071		RHE_RS09175	RHE_RS29535								RHE_RS27600	7	240133	240486	D	24303123	-	RHE_RS27600	WP_011428533.1	117	COG0640	K	ArsR family transcriptional regulator	5307		RHE_RS27310	6	178626	179273	R	24303181	-	RHE_RS27310	WP_011428477.1	215	COG1309	K	TetR/AcrR family transcriptional regulator	5253
RHE_RS06725	R	RHE_RS29195_m4	R	-83	-71	GGTCTTTTACAAG	11.1	1.9e-06	-13174	5721		RHE_RS09250	RHE_RS29630								RHE_RS26840	7	83866	84222	D	24303275	-	RHE_RS26840	WP_011428390.1	118	COG0784	T	MULTISPECIES: response regulator	5157		RHE_RS27195	6	154549	155310	D	24303204	-	RHE_RS27195	WP_011428454.1	253	COG0664	T	Crp/Fnr family transcriptional regulator	5229
RHE_RS18270	D	RHE_RS29195_m4	D	-183	-171	CCTCTTTACCATG	9.6	6.3e-06	-11975	5201		RHE_RS09255	RHE_RS29775								RHE_RS26465	7	9305	10216	D	24303350	-	RHE_RS26465	WP_011428321.1	303	COG0583	K	LysR family transcriptional regulator	5083		RHE_RS26765	6	67085	67843	D	24303290	-	RHE_RS26765	WP_011428377.1	252	COG2186	K	FadR family transcriptional regulator	5142
RHE_RS28865	R	RHE_RS29195_m5	R	-171	-143	GACACTGGAACGCTGGCACGGGACACCTG	13.2	1.4e-07	-15782	6854		RHE_RS09290	RHE_RS29840								RHE_RS14920	7	3051257	3051625	R	24298539	-	RHE_RS14920	WP_042119285.1	122	COG0784	T	response regulator	2872		RHE_RS26495	6	14842	15837	R	24303344	-	RHE_RS26495	WP_042119940.1	331	COG0583	K	LysR family transcriptional regulator	5089
RHE_RS29195	D	RHE_RS29195_m5	D	-101	-73	GACAACCGACCGGTGGCTGGTGACACCAG	27.7	4.0e-16	-35455	15398		RHE_RS09310	RHE_RS29975								RHE_RS13695	7	2788896	2789852	D	24300550	-	RHE_RS13695	WP_042118706.1	318	COG0583	K	LysR family transcriptional regulator	2634		RHE_RS26280	6	477117	477902	D	24302307	-	RHE_RS26280	WP_011428285.1	261	COG1414	K	IclR family transcriptional regulator	5047
RHE_RS29080	D	RHE_RS29080_m1	D	-22	-6	ACAAGCCAGGATCGACG	10.7	2.1e-06	-13074	5678		RHE_RS09325	RHE_RS30095								RHE_RS28340	6	415548	416246	D	24302975	-	RHE_RS28340	WP_011428673.1	232	COG1802	K	GntR family transcriptional regulator	5454		RHE_RS26070	6	428901	429641	D	24302349	-	RHE_RS26070	WP_011428243.1	246	COG2207	K	AraC family transcriptional regulator	5004
RHE_RS01700	R	RHE_RS29080_m2	R	-306	-292	TAGCCCGTCGCGACG	10.9	8.9e-07	-13932	6051		RHE_RS09355	RHE_RS30285								RHE_RS28220	6	385641	386639	R	24302999	-	RHE_RS28220	WP_020919586.1	332	COG1609	K	LacI family DNA-binding transcriptional regulator	5431		RHE_RS25150	6	250064	251443	R	24302533	-	RHE_RS25150	WP_011428072.1	459	COG0053	P	cation transporter	4825
RHE_RS04735	R	RHE_RS29080_m2	R	-126	-112	GAGCCACTCTCGAGA	10.1	4.7e-06	-12268	5328		RHE_RS09360	RHE_RS30310								RHE_RS23350	6	106295	107344	R	24302179	-	RHE_RS23350	WP_042119731.1	349	COG1609	K	LacI family transcriptional regulator	4473		RHE_RS24725	6	164909	165793	D	24302618	-	RHE_RS24725	WP_042119842.1	294	COG0583	K	LysR family transcriptional regulator	4745
RHE_RS20150	D	RHE_RS29080_m2	D	-59	-45	GCGCCCGGGTCGAGA	10.0	6.5e-06	-11944	5187		RHE_RS09405	RHE_RS30470								RHE_RS11690	6	2388570	2388803	D	24298815	-	RHE_RS11690	WP_011425547.1	77	COG0271	T	MULTISPECIES: BolA family transcriptional regulator	2259		RHE_RS24230	6	54027	55916	R	24302717	-	RHE_RS24230	WP_011427900.1	629	COG4172	Q	ABC transporter ATP-binding protein	4645
RHE_RS29080	D	RHE_RS29080_m2	D	-20	-6	AAGCCAGGATCGACG	10.9	8.9e-07	-13932	6051		RHE_RS09445	RHE_RS30570								RHE_RS05170	6	1069095	1069712	R	24298407	-	RHE_RS05170	WP_011424365.1	205	COG1309	K	TetR/AcrR family transcriptional regulator	994		RHE_RS23880	6	218490	219365	R	24302073	-	RHE_RS23880	WP_011427830.1	291	COG0667	R	oxidoreductase	4577
RHE_RS00300	R	RHE_RS29075_m1	R	-232	-221	CCTGTTACAAAA	10.9	3.2e-06	-12652	5495		RHE_RS09475	RHE_RS30745								RHE_RS03040	6	618817	619410	R	24299793	-	RHE_RS03040	WP_042117869.1	197	COG1309	K	TetR/AcrR family transcriptional regulator	578		RHE_RS23555	6	152562	153632	D	24302138	-	RHE_RS23555	WP_042119751.1	356	COG1609	K	LacI family DNA-binding transcriptional regulator	4511
RHE_RS00765	R	RHE_RS29075_m1	R	-322	-311	TACGTTACAAAT	9.7	8.9e-06	-11629	5051		RHE_RS09500	RHE_RS30790								RHE_RS29080	5	573177	575102	D	24302827	-	RHE_RS29080	WP_042120025.1	641	COG0784	T	hybrid sensor histidine kinase/response regulator	5596		RHE_RS23550	6	151455	152381	R	24302139	-	RHE_RS23550	WP_011427766.1	308	COG3386	G	SMP-30/gluconolactonase/LRE family protein	4510
RHE_RS29075	D	RHE_RS29075_m1	D	-106	-95	GCTGTTACACAC	12.4	6.2e-07	-14294	6208		RHE_RS09515	RHE_RS31500								RHE_RS14905	5	3049332	3050057	D	24301058	-	RHE_RS14905	WP_020921838.1	241	COG2771	K	LuxR family transcriptional regulator	2869		RHE_RS23130	6	55707	56393	D	24302223	-	RHE_RS23130	WP_011427684.1	228	COG0745	TK	DNA-binding response regulator	4427
RHE_RS29075	D	RHE_RS29075_m1	D	-96	-85	ACTGTTACAAAC	14.5	1.4e-08	-18084	7854		RHE_RS09535	RHE_RS32370								RHE_RS13060	5	2665159	2666082	D	24301044	-	RHE_RS13060	WP_011425806.1	307	COG0583	K	LysR family transcriptional regulator	2518		RHE_RS22030	6	7468	8115	R	24302036	-	RHE_RS22030	WP_032490474.1	215	COG1309	K	TetR/AcrR family transcriptional regulator	4217
RHE_RS30890	R	RHE_RS29075_m1	R	-147	-136	GTTGTTACACTC	10.0	7.3e-06	-11828	5137		RHE_RS09565	RHE_RS32435								RHE_RS25840	4	382994	383701	D	24302395	-	RHE_RS25840	WP_011428202.1	235	COG2186	K	FadR family transcriptional regulator	4959		RHE_RS22020	6	5454	6176	D	24302038	-	RHE_RS22020	WP_011427471.1	240	COG1802	K	GntR family transcriptional regulator	4215
RHE_RS21355	D	RHE_RS29075_m2	D	-56	-44	GTTTGTAACAAAT	11.2	2.9e-06	-12751	5538		RHE_RS09570	RHE_RS32555								RHE_RS19670	4	4069010	4070029	R	24300942	-	RHE_RS19670	WP_073990398.1	339	COG1609	K	LacI family transcriptional regulator	3786		RHE_RS21085	6	4378630	4379895	R	24301217	-	RHE_RS21085	WP_003589536.1	421	COG1158	K	MULTISPECIES: transcription termination factor Rho	4065
RHE_RS29075	D	RHE_RS29075_m2	D	-107	-95	CGCTGTTACACAC	10.9	3.9e-06	-12455	5409		RHE_RS09575	RHE_RS32675								RHE_RS27845	3	295763	296230	R	24303074	-	RHE_RS27845	WP_011428579.1	155	COG1522	K	Lrp/AsnC family transcriptional regulator	5358		RHE_RS20770	6	4307518	4307787	D	24299906	-	RHE_RS20770	WP_004676172.1	89	COG0211	J	MULTISPECIES: 50S ribosomal protein L27	4006
RHE_RS29075	D	RHE_RS29075_m2	D	-97	-85	CACTGTTACAAAC	12.6	5.4e-08	-16734	7268		RHE_RS09595	RHE_RS33140								RHE_RS18650	2	3860249	3861280	D	24297893	-	RHE_RS18650	WP_011426860.1	343	COG1609	K	LacI family transcriptional regulator	3591		RHE_RS20755	6	4304967	4306409	R	24298250	-	RHE_RS20755	WP_011427246.1	480	COG5476	R	hypothetical protein	4004
RHE_RS30890	R	RHE_RS29075_m2	R	-147	-135	CGTTGTTACACTC	11.3	2.2e-06	-13027	5658		RHE_RS09605																								RHE_RS19595	6	4055695	4056828	R	24301237	-	RHE_RS19595	WP_041678770.1	377	COG1686	M	D-alanyl-D-alanine carboxypeptidase	3772
RHE_RS01550	R	RHE_RS29075_m3	R	-119	-99	AACGTTACAGTATGTAACATT	11.5	7.8e-07	-14064	6108		RHE_RS09625																								RHE_RS19305	6	4005116	4006411	D	24300092	-	RHE_RS19305	WP_011426977.1	431	COG2271	G	MFS transporter	3715
RHE_RS15415	D	RHE_RS29075_m3	D	-129	-109	TCTGTAAAATTGTGTTGCAGC	8.8	5.9e-06	-12041	5229		RHE_RS09650																								RHE_RS19300	6	4004411	4004989	R	24301642	-	RHE_RS19300	WP_011426976.1	192	COG1309	K	TetR/AcrR family transcriptional regulator	3714
RHE_RS16530	D	RHE_RS29075_m3	D	-325	-305	GTCGTGACACAGAATAACACT	8.5	7.7e-06	-11774	5114		RHE_RS09690																RHE_RS20580	WP_011427212.1	287	COG0568	K	MULTISPECIES: RNA polymerase factor sigma-32			RHE_RS19190	6	3980380	3981108	R	24299246	-	RHE_RS19190	WP_011426955.1	242			DUF4167 domain-containing protein	3692
RHE_RS29075	D	RHE_RS29075_m3	D	-106	-86	GCTGTTACACACTGTTACAAA	20.8	1.8e-11	-24741	10745		RHE_RS09695																RHE_RS17090	WP_011426574.1	302	COG0568	K	RNA polymerase sigma factor RpoH			RHE_RS18615	6	3851481	3852854	R	24301083	-	RHE_RS18615	WP_011426853.1	457	COG2723	G	beta-glucosidase	3585
RHE_RS29075	D	RHE_RS29075_m3	D	-96	-76	ACTGTTACAAACTTTCACCCT	19.3	2.1e-10	-22284	9678		RHE_RS09700																RHE_RS15090	WP_011426193.1	685	COG0568	K	MULTISPECIES: RNA polymerase sigma factor RpoD			RHE_RS18520	6	3832841	3833863	R	24298402	-	RHE_RS18520	WP_020922290.1	340	COG1609	K	MULTISPECIES: LacI family transcriptional regulator	3566
RHE_RS30890	R	RHE_RS29075_m3	R	-156	-136	GTTGTTACACTCTGTTGCAAA	15.7	1.7e-08	-17890	7770		RHE_RS09720																RHE_RS26695	WP_086005055.1	169	COG1595	K	RNA polymerase subunit sigma-70			RHE_RS18325	6	3778851	3779795	R	24298651	-	RHE_RS18325	WP_042119013.1	314	COG3181	C	tripartite tricarboxylate transporter substrate binding protein	3527
RHE_RS00765	R	RHE_RS29075_m4	R	-331	-314	GTTACAAATCGGTAACAG	8.2	4.9e-06	-12226	5310		RHE_RS09725																RHE_RS26680	WP_011428363.1	175	COG1595	K	RNA polymerase sigma factor			RHE_RS18225	6	3757583	3762304	R	24299830	-	RHE_RS18225	WP_011426783.1	1573	COG0067	E	glutamate synthase large subunit	3507
RHE_RS00765	R	RHE_RS29075_m4	R	-321	-304	GTCACGGTACGTTACAAA	7.4	8.0e-06	-11736	5097		RHE_RS09730																RHE_RS03775	WP_042117931.1	201	COG1595	K	RNA polymerase sigma factor			RHE_RS18085	6	3727018	3727914	R	24299192	-	RHE_RS18085	WP_042119332.1	298	COG0583	K	LysR family transcriptional regulator	3479
RHE_RS01550	R	RHE_RS29075_m4	R	-119	-102	GTTACAGTATGTAACATT	11.5	5.3e-07	-14450	6276		RHE_RS09770																RHE_RS02045	WP_011423785.1	519	COG1508	K	RNA polymerase sigma-54 factor			RHE_RS17930	6	3696175	3697167	D	24297918	-	RHE_RS17930	WP_011426729.1	330	COG3181	C	tripartite tricarboxylate transporter substrate binding protein	3448
RHE_RS11265	D	RHE_RS29075_m4	D	-46	-29	GTCACACTATGTGACATA	7.5	8.0e-06	-11736	5097		RHE_RS09785																RHE_RS32370	WP_011428767.1	218	COG1595	K	RNA polymerase sigma factor			RHE_RS17835	6	3677381	3677716	D	24297846	-	RHE_RS17835	WP_011426713.1	111	COG0640	K	ArsR family transcriptional regulator	3429
RHE_RS26290	D	RHE_RS29075_m4	D	-68	-51	GTTACAAGTTGTCAGACA	10.2	1.3e-06	-13553	5886		RHE_RS09790																RHE_RS20110	WP_011427123.1	186	COG1595	K	RNA polymerase sigma factor RpoE			RHE_RS17710	6	3651601	3652320	R	24301232	tolQ	RHE_RS17710	WP_004671617.1	239	COG0811	U	MULTISPECIES: protein TolQ	3404
RHE_RS29075	D	RHE_RS29075_m4	D	-103	-86	GTTACACACTGTTACAAA	21.3	1.4e-11	-24992	10854		RHE_RS09800																RHE_RS15675	WP_011426302.1	169	COG1595	K	RNA polymerase sigma factor			RHE_RS17595	6	3626357	3627247	R	24298709	-	RHE_RS17595	WP_011426669.1	296	COG0662	G	AraC family transcriptional regulator	3382
RHE_RS29075	D	RHE_RS29075_m4	D	-93	-76	GTTACAAACTTTCACCCT	19.4	3.1e-10	-21894	9509		RHE_RS09835																RHE_RS28625	WP_011428727.1	236	COG1595	K	RNA polymerase sigma factor			RHE_RS17145	6	3521414	3522322	D	24301330	-	RHE_RS17145	WP_011426585.1	302	COG0583	K	LysR family transcriptional regulator	3300
RHE_RS30890	R	RHE_RS29075_m4	R	-156	-139	GTTACACTCTGTTGCAAA	13.4	1.3e-07	-15856	6886		RHE_RS09845																RHE_RS23540	WP_011427764.1	173	COG1595	K	RNA polymerase sigma factor			RHE_RS17090	6	3504521	3505429	D	24301374	-	RHE_RS17090	WP_011426574.1	302	COG0568	K	RNA polymerase sigma factor RpoH	3289
RHE_RS01550	R	RHE_RS29075_m5	R	-119	-90	AGTTCACGGAACGTTACAGTATGTAACATT	8.3	9.8e-06	-11533	5009		RHE_RS09860																								RHE_RS16670	6	3425813	3426376	R	24298291	-	RHE_RS16670	WP_042118936.1	187	COG1309	K	TetR/AcrR family transcriptional regulator	3207
RHE_RS05185	D	RHE_RS29075_m5	D	-72	-43	TGTTGCCGCATTCAACCAATGGGTAACAAC	9.7	3.4e-06	-12592	5469		RHE_RS09865																								RHE_RS15835	6	3242751	3244331	D	24301027	-	RHE_RS15835	WP_011426332.1	526	COG4166	E	peptide ABC transporter substrate-binding protein	3045
RHE_RS18145	D	RHE_RS29075_m5	D	-79	-50	GAGTGGAGAAGAGAGAAAATATTTGACGCT	9.0	5.8e-06	-12058	5237		RHE_RS09875																								RHE_RS15800	6	3234046	3234363	D	24300595	-	RHE_RS15800	WP_011426325.1	105	COG0640	K	ArsR family transcriptional regulator	3038
RHE_RS28885	R	RHE_RS28890_m1	R	-55	-39	TGTTAAACCTACCGATT	22.1	7.4e-11	-23327	10131		RHE_RS09970																								RHE_RS15675	6	3205673	3206182	D	24301290	-	RHE_RS15675	WP_011426302.1	169	COG1595	K	RNA polymerase sigma factor	3016
RHE_RS28890	D	RHE_RS28890_m1	D	-137	-121	TGTTAAACCTACCGATT	22.1	7.4e-11	-23327	10131		RHE_RS09990																								RHE_RS15560	6	3182127	3183983	R	24301484	-	RHE_RS15560	WP_011426282.1	618	COG1132	V	ABC transporter ATP-binding protein	2995
RHE_RS06955	R	RHE_RS28890_m2	R	-361	-350	CATACACCAGGG	8.3	9.8e-06	-11533	5009		RHE_RS09995																								RHE_RS15500	6	3171121	3171432	R	24299892	clpS	RHE_RS15500	WP_011426270.1	103	COG2127	O	ATP-dependent Clp protease ClpS	2983
RHE_RS06960	D	RHE_RS28890_m2	D	-210	-199	CATACACCAGGG	8.3	9.8e-06	-11533	5009		RHE_RS10095																								RHE_RS15430	6	3156496	3156996	R	24298543	-	RHE_RS15430	WP_004680153.1	166	COG5465	S	MULTISPECIES: hypothetical protein	2970
RHE_RS26355	D	RHE_RS28890_m2	D	-19	-8	AATACATCAGGG	9.2	5.9e-06	-12041	5229		RHE_RS10220																								RHE_RS15415	6	3154613	3155305	D	24298292	-	RHE_RS15415	WP_011426254.1	230	COG0491	R	MBL fold metallo-hydrolase	2967
RHE_RS04595	R	RHE_RS28890_m3	R	-109	-94	TAGAGCATGGCGGAAA	10.4	5.6e-06	-12093	5252		RHE_RS10265																								RHE_RS14965	6	3058323	3058535	D	24301318	-	RHE_RS14965	WP_042118787.1	70			hypothetical protein	2880
RHE_RS19670	R	RHE_RS28890_m3	R	-104	-89	CGGAGCAGTGAGGAGA	11.3	2.4e-06	-12940	5620		RHE_RS10285																								RHE_RS14475	6	2952392	2954356	D	24297916	-	RHE_RS14475	WP_011426075.1	654	COG0840	NT	methyl-accepting chemotaxis protein	2784
RHE_RS28885	R	RHE_RS28890_m3	R	-169	-154	AAGAGCCGACCGGAGA	12.7	3.8e-07	-14783	6420		RHE_RS10345																								RHE_RS14390	6	2931607	2932812	R	24301259	-	RHE_RS14390	WP_011426058.1	401	COG0845	MV	efflux RND transporter periplasmic adaptor subunit	2767
RHE_RS28885	R	RHE_RS28890_m3	R	-137	-122	CAGAGCATTGCGGATC	11.3	2.4e-06	-12940	5620		RHE_RS10425																								RHE_RS13070	6	2666412	2666789	R	24297884	-	RHE_RS13070	WP_011425808.1	125	COG3279	KT	response regulator	2520
RHE_RS28890	D	RHE_RS28890_m3	D	-54	-39	CAGAGCATTGCGGATC	11.3	2.4e-06	-12940	5620		RHE_RS10445																								RHE_RS12990	6	2651656	2652150	D	24298699	-	RHE_RS12990	WP_011425794.1	164	COG1846	K	MarR family transcriptional regulator	2505
RHE_RS28890	D	RHE_RS28890_m3	D	-22	-7	AAGAGCCGACCGGAGA	12.7	3.8e-07	-14783	6420		RHE_RS10485																								RHE_RS12920	6	2636767	2638098	R	24298962	-	RHE_RS12920	WP_011425779.1	443	COG0745	TK	diguanylate cyclase response regulator	2492
RHE_RS13235	R	RHE_RS28890_m4	R	-89	-71	ATCCCGTTTTCTCTGTATG	1.9	6.9e-06	-11884	5161		RHE_RS10510																								RHE_RS12060	6	2468122	2469075	R	24298773	-	RHE_RS12060	WP_011425620.1	317	COG1879	G	LacI family transcriptional regulator	2331
RHE_RS13800	R	RHE_RS28890_m4	R	-120	-102	CTACCTACTAGTTAGTAGA	7.0	6.5e-07	-14246	6187		RHE_RS10515																								RHE_RS11590	6	2370324	2370818	R	24297612	-	RHE_RS11590	WP_041678657.1	164			4-hydroxyphenylacetate 3-monooxygenase	2240
RHE_RS13805	D	RHE_RS28890_m4	D	-39	-21	CTACCTACTAGTTAGTAGA	7.0	6.5e-07	-14246	6187		RHE_RS10520																								RHE_RS11075	6	2270894	2271589	D	24299851	-	RHE_RS11075	WP_011425429.1	231	COG1309	K	TetR family transcriptional regulator	2139
RHE_RS20455	R	RHE_RS28890_m4	R	-90	-72	TAACGGAGTATTCGGGATT	1.5	8.2e-06	-11711	5086		RHE_RS10540																								RHE_RS10715	6	2188732	2189439	D	24298129	-	RHE_RS10715	WP_011425360.1	235	COG2928	S	DUF502 domain-containing protein	2069
RHE_RS20460	D	RHE_RS28890_m4	D	-319	-301	TAACGGAGTATTCGGGATT	1.5	8.2e-06	-11711	5086		RHE_RS10545																								RHE_RS08570	6	1768218	1768526	D	24298197	-	RHE_RS08570	WP_003547547.1	102	COG0051	J	MULTISPECIES: 30S ribosomal protein S10	1650
RHE_RS28885	R	RHE_RS28890_m4	R	-65	-47	CTACCGATTACTCGGTATT	24.1	7.3e-12	-25643	11137		RHE_RS10550																								RHE_RS08535	6	1754187	1758326	D	24298441	rpoB	RHE_RS08535	WP_011424975.1	1379	COG0085	K	DNA-directed RNA polymerase subunit beta	1643
RHE_RS28890	D	RHE_RS28890_m4	D	-129	-111	CTACCGATTACTCGGTATT	24.1	7.3e-12	-25643	11137		RHE_RS10580																								RHE_RS08430	6	1736224	1737483	D	24300651	-	RHE_RS08430	WP_042118261.1	419	COG0860	M	N-acetylmuramoyl-L-alanine amidase	1626
RHE_RS14820	D	RHE_RS28890_m5	D	-184	-168	CCAAAAAAATACCAATT	6.7	6.0e-06	-12024	5222		RHE_RS10640																								RHE_RS08385	6	1723177	1725831	R	24298820	topA	RHE_RS08385	WP_011424953.1	884	COG0550	L	type I DNA topoisomerase	1617
RHE_RS17020	D	RHE_RS28890_m5	D	-315	-299	CGTTAAAAATGCCGGCT	7.9	3.1e-06	-12684	5509		RHE_RS10645																								RHE_RS08150	6	1678232	1679218	R	24301381	-	RHE_RS08150	WP_011424917.1	328	COG0667	R	aldo/keto reductase	1573
RHE_RS32370	R	RHE_RS28890_m5	R	-152	-136	GTTTAAATCGACCGAGT	8.6	2.1e-06	-13074	5678		RHE_RS10650																								RHE_RS06685	6	1363050	1363838	R	24298052	-	RHE_RS06685	WP_011424646.1	262	COG1028	IQR	KR domain-containing protein	1285
RHE_RS28885	R	RHE_RS28890_m5	R	-164	-148	CGTTAAAAGAGCCGACC	8.3	2.6e-06	-12860	5585		RHE_RS10660																								RHE_RS06240	6	1269712	1269984	D	24300111	-	RHE_RS06240	WP_011424557.1	90	COG1937	K	metal/formaldehyde-sensitive transcriptional repressor	1197
RHE_RS28885	R	RHE_RS28890_m5	R	-55	-39	TGTTAAACCTACCGATT	19.6	4.4e-10	-21544	9357		RHE_RS10710																								RHE_RS06235	6	1268938	1269432	R	24300112	-	RHE_RS06235	WP_011424556.1	164	COG0456	J	N-acetyltransferase	1196
RHE_RS28890	D	RHE_RS28890_m5	D	-137	-121	TGTTAAACCTACCGATT	19.6	4.4e-10	-21544	9357		RHE_RS10715																								RHE_RS06005	6	1224850	1225086	D	24301621	rpsU	RHE_RS06005	WP_011424510.1	78	COG0828	J	MULTISPECIES: 30S ribosomal protein S21	1149
RHE_RS28890	D	RHE_RS28890_m5	D	-28	-12	CGTTAAAAGAGCCGACC	8.3	2.6e-06	-12860	5585		RHE_RS10725																								RHE_RS05820	6	1191552	1192100	D	24297729	-	RHE_RS05820	WP_011424480.1	182	COG3247	S	HdeD family acid-resistance protein	1116
RHE_RS26945	D	RHE_RS28855_m1	D	-53	-29	ACACTAACTATAAGATAGCGTCCGT	14.1	8.5e-08	-16281	7071		RHE_RS10735																								RHE_RS05815	6	1190760	1191380	R	24297599	-	RHE_RS05815	WP_011424479.1	206	COG1309	K	transcriptional regulator BetI	1115
RHE_RS28850	R	RHE_RS28855_m1	R	-76	-52	CTACTGAATATCATGCATCGTCCTT	18.5	3.0e-10	-21927	9523		RHE_RS10745																								RHE_RS05655	6	1158150	1159043	D	24299720	-	RHE_RS05655	WP_011424449.1	297			methyltransferase domain-containing protein	1083
RHE_RS28855	D	RHE_RS28855_m1	D	-48	-24	CTACTGAATATCATGCATCGTCCTT	18.5	3.0e-10	-21927	9523		RHE_RS10760																								RHE_RS05380	6	1107313	1107603	D	24298126	-	RHE_RS05380	WP_011424398.1	96			CopG family transcriptional regulator	1033
RHE_RS17020	D	RHE_RS28855_m2	D	-360	-340	TGAGGACGGCCGAACATATCC	9.1	9.7e-06	-11543	5013		RHE_RS10795																								RHE_RS05335	6	1099553	1100299	D	24301010	-	RHE_RS05335	WP_042118056.1	248	COG1028	IQR	3-oxoacyl-ACP reductase	1026
RHE_RS27555	R	RHE_RS28855_m2	R	-280	-260	TTCGGACGAATGCTAATATTA	9.2	9.0e-06	-11618	5046		RHE_RS10800																								RHE_RS05330	6	1099101	1099445	R	24297929	-	RHE_RS05330	WP_011424390.1	114	COG0640	K	ArsR family transcriptional regulator	1025
RHE_RS27560	D	RHE_RS28855_m2	D	-71	-51	TTCGGACGAATGCTAATATTA	9.2	9.0e-06	-11618	5046		RHE_RS10805																								RHE_RS04955	6	1029911	1030555	D	24301331	-	RHE_RS04955	WP_011424327.1	214			hypothetical protein	951
RHE_RS30570	R	RHE_RS28855_m2	R	-332	-312	TGAGGACGATAAGACATAATC	9.3	9.0e-06	-11618	5046		RHE_RS10825																								RHE_RS04735	6	989104	990288	R	24300294	-	RHE_RS04735	WP_011424286.1	394			J domain-containing protein	908
RHE_RS26635	D	RHE_RS28855_m3	D	-114	-87	GTACTCCAACTGTTGAAAAGCGGAATCT	6.7	2.6e-06	-12860	5585		RHE_RS10890																								RHE_RS04575	6	957245	957694	D	24298570	-	RHE_RS04575	WP_011424256.1	149	COG1733	K	transcriptional regulator	877
RHE_RS04010	R	RHE_RS28855_m4	R	-62	-32	TTTCTATTCCGAAACGATGCCCCCGTCCATA	6.8	2.6e-06	-12860	5585		RHE_RS10920																								RHE_RS04500	6	938723	939535	D	24300568	-	RHE_RS04500	WP_011424242.1	270	COG3713	M	MipA/OmpV family protein	862
RHE_RS04015	D	RHE_RS28855_m4	D	-65	-35	TTTCTATTCCGAAACGATGCCCCCGTCCATA	6.8	2.6e-06	-12860	5585		RHE_RS10960																								RHE_RS04100	6	852938	853687	R	24298769	-	RHE_RS04100	WP_011424164.1	249	COG1376	M	L,D-transpeptidase	783
RHE_RS09250	D	RHE_RS28855_m4	D	-177	-147	ATCATAACATGAAGGGGCAGGGCGTTCTACG	5.6	5.2e-06	-12167	5284		RHE_RS10975																								RHE_RS04025	6	837503	838144	D	24300269	-	RHE_RS04025	WP_011424149.1	213	COG1309	K	TetR/AcrR family transcriptional regulator	768
RHE_RS09720	D	RHE_RS28725_m1	D	-111	-84	AAATCGTGCTAAAAAACCATGGTGACGG	5.6	1.6e-06	-13346	5796		RHE_RS11005																								RHE_RS03505	6	710357	712120	D	24300749	-	RHE_RS03505	WP_011424057.1	587	COG3206	M	succinoglycan biosynthesis protein ExoP	671
RHE_RS10715	D	RHE_RS28725_m1	D	-88	-61	AATTCTGGCAATTTTACCAAATGGACAA	2.3	8.6e-06	-11664	5066		RHE_RS11060																								RHE_RS03450	6	702470	702817	D	24297863	-	RHE_RS03450	WP_010028573.1	115	COG5442	N	MULTISPECIES: flagellar biosynthesis regulatory protein FlaF	660
RHE_RS11380	D	RHE_RS28725_m1	D	-92	-65	ACATCGGGTTAACTCCCCTTCTTGAGGG	3.3	5.3e-06	-12148	5276		RHE_RS11075																								RHE_RS02715	6	555258	555905	R	24297594	-	RHE_RS02715	WP_011423908.1	215	COG2197	TK	DNA-binding response regulator	516
RHE_RS14375	R	RHE_RS28725_m1	R	-148	-121	CAATGCGCTGATATCACCAGTTTTAAGG	3.4	5.1e-06	-12186	5292		RHE_RS11085																								RHE_RS02695	6	552756	553631	D	24300852	-	RHE_RS02695	WP_020920318.1	291	COG0834	ET	ABC transporter substrate-binding protein	513
RHE_RS28725	D	RHE_RS28725_m1	D	-125	-98	CAATCTGGATATTTCACCAGGTTGACCG	33.3	2.9e-17	-38079	16538		RHE_RS11145																								RHE_RS02310	6	467262	467843	R	24300304	-	RHE_RS02310	WP_011423833.1	193	COG1309	K	TetR/AcrR family transcriptional regulator	439
RHE_RS28725	D	RHE_RS28725_m1	D	-50	-23	CGATCGGAAGCTCTTGGCAATTTGACGC	10.8	8.7e-08	-16257	7060		RHE_RS11170																								RHE_RS01815	6	372206	373288	D	24301448	-	RHE_RS01815	WP_011423743.1	360	COG1748	E	dehydrogenase	344
RHE_RS08055	D	RHE_RS28725_m2	D	-23	-2	TAGCAACAACGGGAGGGCAACA	7.8	7.1e-06	-11855	5149		RHE_RS11185																								RHE_RS01320	6	272698	272901	D	24297507	-	RHE_RS01320	WP_011423646.1	67	COG0291	J	MULTISPECIES: 50S ribosomal protein L35	250
RHE_RS11075	D	RHE_RS28725_m2	D	-23	-2	TCAAATCATCAGGAAGGACGCA	10.9	1.1e-06	-13720	5959		RHE_RS11190																								RHE_RS01265	6	263547	264116	D	24301652	-	RHE_RS01265	WP_011423635.1	189	COG1396	K	XRE family transcriptional regulator	239
RHE_RS28725	D	RHE_RS28725_m2	D	-152	-131	GTTTCACAACAGGAAGCCGAGC	13.5	1.7e-07	-15587	6770		RHE_RS11195																								RHE_RS01260	6	262713	263411	R	24301653	tenA	RHE_RS01260	WP_011423634.1	232	COG0819	H	thiaminase II	238
RHE_RS05105	D	RHE_RS28725_m3	D	-285	-265	ATATCAGCAAGGGCTCATGAA	9.8	1.5e-07	-15713	6824		RHE_RS11200																								RHE_RS00680	6	142290	143045	R	24297870	-	RHE_RS00680	WP_011423526.1	251	COG1212	M	3-deoxy-manno-octulosonate cytidylyltransferase	126
RHE_RS17305	R	RHE_RS28725_m3	R	-339	-319	ACATCGGAAATCTCTTATTCA	8.8	2.7e-07	-15125	6569		RHE_RS11205																								RHE_RS00480	6	104403	105212	D	24298046	-	RHE_RS00480	WP_011423491.1	269	COG0789	K	cupin domain-containing protein	87
RHE_RS24350	R	RHE_RS28725_m3	R	-85	-65	AAATCAAAATCTTCCTATCGA	1.5	9.5e-06	-11564	5022		RHE_RS11220																								RHE_RS00475	6	102958	104238	R	24298047	gabT	RHE_RS00475	WP_011423490.1	426	COG0160	E	4-aminobutyrate--2-oxoglutarate transaminase	86
RHE_RS02165	D	RHE_RS28725_m4	D	-159	-145	AACTCCTCCCCTCGG	10.8	2.3e-06	-12983	5638		RHE_RS11250																								RHE_RS00465	6	101158	101367	D	24298963	-	RHE_RS00465	WP_011423488.1	69	COG2900	S	hypothetical protein	84
RHE_RS02165	D	RHE_RS28725_m5	D	-159	-145	AACTCCTCCCCTCGG	7.9	6.2e-06	-11991	5208		RHE_RS11255																								RHE_RS00460	6	99563	100978	R	24298964	-	RHE_RS00460	WP_011423487.1	471	COG1904	G	glucuronate isomerase	83
RHE_RS27645	D	RHE_RS28725_m5	D	-352	-338	GATTCCTCCCCTTTT	11.2	8.3e-07	-14002	6081		RHE_RS11265																								RHE_RS00155	6	31371	33953	R	24298959	-	RHE_RS00155	WP_011423434.1	860	COG2205	T	PAS domain-containing protein	29
RHE_RS05945	R	RHE_RS28710_m1	R	-302	-286	GTTTTAATACGAGTTTT	9.1	5.1e-06	-12186	5292		RHE_RS11280																								RHE_RS31670	5	2743047	2744303	R	30584486	-	RHE_RS31670	WP_042119267.1	418			VCBS protein	2596
RHE_RS05950	D	RHE_RS28710_m1	D	-176	-160	GTTTTAATACGAGTTTT	9.1	5.1e-06	-12186	5292		RHE_RS11300																								RHE_RS31225	5	3053775	3054269	D	27430658	-	RHE_RS31225	WP_011426165.1	164			hypothetical protein	2875
RHE_RS15755	D	RHE_RS28710_m1	D	-114	-98	CTATTTCTGCGCGTTTC	9.7	3.4e-06	-12592	5469		RHE_RS11340																								RHE_RS29975	5	125893	126582	D	24297251	-	RHE_RS29975	WP_004673291.1	229	COG1802	K	MULTISPECIES: GntR family transcriptional regulator	5771
RHE_RS17060	R	RHE_RS28710_m1	R	-71	-55	AAAATTGCGCGAAGTTT	8.8	6.2e-06	-11991	5208		RHE_RS11370																								RHE_RS28770	5	504098	505864	R	24302889	-	RHE_RS28770	WP_011428755.1	588	COG5001	T	GGDEF domain-containing protein	5538
RHE_RS16100	R	RHE_RS28710_m2	R	-236	-227	GAAATAATGA	10.5	2.9e-06	-12751	5538		RHE_RS11380																								RHE_RS28455	5	440095	441348	D	24302952	-	RHE_RS28455	WP_011428694.1	417	COG4638	PR	aromatic ring-hydroxylating dioxygenase subunit alpha	5477
RHE_RS19250	R	RHE_RS28710_m2	R	-117	-108	GCAATAATAA	10.3	7.9e-06	-11749	5102		RHE_RS11385																								RHE_RS28450	5	439096	439983	R	24302953	-	RHE_RS28450	WP_011428693.1	295	COG0583	K	LysR family transcriptional regulator	5476
RHE_RS25185	D	RHE_RS28710_m2	D	-81	-72	GAAATAATAA	10.6	8.1e-07	-14026	6092		RHE_RS11415																								RHE_RS27925	5	320585	321622	D	24303058	-	RHE_RS27925	WP_011428595.1	345	COG1609	K	LacI family transcriptional regulator	5373
RHE_RS28710	D	RHE_RS28710_m2	D	-97	-88	GAAATAATGA	10.5	2.9e-06	-12751	5538		RHE_RS11435																								RHE_RS27460	5	207840	209642	R	24303151	-	RHE_RS27460	WP_011428506.1	600	COG2203	T	PucR family transcriptional regulator	5281
RHE_RS03390	D	RHE_RS28710_m3	D	-206	-181	AAAATCTCTCTAACTATCAGATATTT	9.1	4.9e-06	-12226	5310		RHE_RS11465																								RHE_RS27415	5	199438	199935	D	24303160	-	RHE_RS27415	WP_011428497.1	165	COG1522	K	Lrp/AsnC family transcriptional regulator	5272
RHE_RS10220	D	RHE_RS28710_m3	D	-36	-11	GCTATTTATTCCATGATGTCATATAA	11.9	6.4e-07	-14262	6194		RHE_RS11475																								RHE_RS27280	5	171608	172357	R	24303187	-	RHE_RS27280	WP_011428471.1	249	COG1802	K	GntR family transcriptional regulator	5247
RHE_RS12915	D	RHE_RS28710_m3	D	-133	-108	CAAATCCCGGTCAATGTCGCATATTT	9.0	5.2e-06	-12167	5284		RHE_RS11525																								RHE_RS27185	5	152553	153446	D	24303206	-	RHE_RS27185	WP_042119981.1	297	COG0583	K	LysR family transcriptional regulator	5227
RHE_RS15090	R	RHE_RS28710_m3	R	-362	-337	GCGATTGCGAACCTTATTTAAGAAGC	8.9	5.6e-06	-12093	5252		RHE_RS11535																								RHE_RS26720	5	61512	62237	D	24303299	-	RHE_RS26720	WP_011428372.1	241	COG0664	T	Crp/Fnr family transcriptional regulator	5134
RHE_RS17720	D	RHE_RS28710_m3	D	-52	-27	ACAATTCCTAACTATTCCCGATAATA	8.1	9.4e-06	-11575	5027		RHE_RS11540																								RHE_RS26415	5	504120	505334	D	24302280	-	RHE_RS26415	WP_011428312.1	404	COG1414	K	replication initiation protein	5074
RHE_RS03390	D	RHE_RS28710_m4	D	-208	-179	TGAAAATCTCTCTAACTATCAGATATTTTT	10.4	3.8e-06	-12481	5420		RHE_RS11555																								RHE_RS26000	5	415886	416785	R	24302363	-	RHE_RS26000	WP_011428230.1	299	COG4977	K	AraC family transcriptional regulator	4990
RHE_RS11950	R	RHE_RS28710_m4	R	-140	-111	GTTAACATCCGTTAAATATCCCTAAATTAT	9.9	5.3e-06	-12148	5276		RHE_RS11590																								RHE_RS25970	5	412994	413578	R	24302369	-	RHE_RS25970	WP_011428225.1	194	COG0662	G	XRE family transcriptional regulator	4985
RHE_RS11955	D	RHE_RS28710_m4	D	-358	-329	GTTAACATCCGTTAAATATCCCTAAATTAT	9.9	5.3e-06	-12148	5276		RHE_RS11615																								RHE_RS24540	5	117367	118077	D	24302655	-	RHE_RS24540	WP_029531946.1	236	COG1802	K	MULTISPECIES: GntR family transcriptional regulator	4708
RHE_RS12170	R	RHE_RS28710_m4	R	-191	-162	AAAATTATGAAATTATTAGTTAATTTTTTA	12.0	7.8e-07	-14064	6108		RHE_RS11635																								RHE_RS24350	5	76908	77807	R	24302693	-	RHE_RS24350	WP_011427922.1	299	COG0583	K	LysR family transcriptional regulator	4669
RHE_RS12175	D	RHE_RS28710_m4	D	-244	-215	AAAATTATGAAATTATTAGTTAATTTTTTA	12.0	7.8e-07	-14064	6108		RHE_RS11640																								RHE_RS24095	5	19393	20133	R	24302744	-	RHE_RS24095	WP_041679049.1	246	COG1309	K	TetR/AcrR family transcriptional regulator	4618
RHE_RS13975	R	RHE_RS28710_m4	R	-77	-48	GAAATTATGTCAATAATACTGACCTATTTT	9.4	7.9e-06	-11749	5102		RHE_RS11645																								RHE_RS24075	5	11749	17220	R	24302748	-	RHE_RS24075	WP_011427869.1	1823	COG0457	R	membrane protein	4615
RHE_RS13980	D	RHE_RS28710_m4	D	-337	-308	GAAATTATGTCAATAATACTGACCTATTTT	9.4	7.9e-06	-11749	5102		RHE_RS11665																								RHE_RS23945	5	231024	232037	R	24302060	-	RHE_RS23945	WP_041678980.1	337	COG1609	K	LacI family transcriptional regulator	4591
RHE_RS14885	R	RHE_RS28710_m4	R	-208	-179	GAAATTCCTGCATGTTTTAGGCGAAATTTT	12.1	7.8e-07	-14064	6108		RHE_RS11685																								RHE_RS23775	5	197007	197912	D	24302094	-	RHE_RS23775	WP_011427811.1	301	COG0583	K	LysR family transcriptional regulator	4556
RHE_RS16350	D	RHE_RS28710_m4	D	-221	-192	ACAATCTTGCGAAATACACTACGAAAATCG	9.8	5.8e-06	-12058	5237		RHE_RS11690																								RHE_RS23770	5	196002	196775	R	24302095	-	RHE_RS23770	WP_011427810.1	257	COG4221	C	SDR family NAD(P)-dependent oxidoreductase	4555
RHE_RS09250	D	RHE_RS28710_m5	D	-231	-218	GAAATATTCGAAAA	10.7	3.5e-06	-12563	5456		RHE_RS11740																								RHE_RS22955	5	18010	18705	D	24302258	-	RHE_RS22955	WP_011427648.1	231	COG1802	K	MULTISPECIES: GntR family transcriptional regulator	4393
RHE_RS16230	R	RHE_RS28710_m5	R	-255	-242	AAAATAATCGAATT	12.6	5.4e-07	-14432	6268		RHE_RS11765																								RHE_RS21275	5	38449	39711	D	24301837	-	RHE_RS21275	WP_011427339.1	420	COG1522	K	MULTISPECIES: plasmid replication protein RepCa2	4095
RHE_RS16235	D	RHE_RS28710_m5	D	-88	-75	AAAATAATCGAATT	12.6	5.4e-07	-14432	6268		RHE_RS11805																								RHE_RS20580	5	4262380	4263243	D	24299232	-	RHE_RS20580	WP_011427212.1	287	COG0568	K	MULTISPECIES: RNA polymerase factor sigma-32	3969
RHE_RS18145	D	RHE_RS28710_m5	D	-22	-9	AGAACAATCGAAAG	10.0	6.3e-06	-11975	5201		RHE_RS11815																								RHE_RS20320	5	4201862	4202746	R	24298783	tesB	RHE_RS20320	WP_011427165.1	294	COG1946	I	acyl-CoA thioesterase II	3917
RHE_RS22735	R	RHE_RS28710_m5	R	-120	-107	ACAATGTTCGAATG	9.5	9.1e-06	-11607	5041		RHE_RS11820																								RHE_RS20070	5	4154213	4155436	R	24300349	-	RHE_RS20070	WP_011427116.1	407	COG0137	E	argininosuccinate synthase	3864
RHE_RS12545	R	RHE_RS28695_m1	R	-198	-174	GGAGAGGGTTAGGGTGAGGGGTAAT	9.0	4.9e-06	-12226	5310		RHE_RS11840																								RHE_RS20060	5	4151972	4152886	R	24300316	-	RHE_RS20060	WP_042119077.1	304	COG0583	K	LysR family transcriptional regulator	3863
RHE_RS00380	D	RHE_RS28695_m2	D	-28	-19	TTGCGCTATT	10.7	3.3e-06	-12622	5481		RHE_RS11855																								RHE_RS20020	5	4144309	4144815	R	24298947	-	RHE_RS20020	WP_011427107.1	168	COG0456	J	MULTISPECIES: N-acetyltransferase	3855
RHE_RS11645	D	RHE_RS28695_m2	D	-185	-176	TGGCGCTATT	10.1	8.9e-06	-11629	5051		RHE_RS11860																								RHE_RS19425	5	4026829	4027188	R	24300902	-	RHE_RS19425	WP_010028815.1	119	COG2204	T	MULTISPECIES: response regulator	3738
RHE_RS14645	D	RHE_RS28695_m2	D	-136	-127	TCGCGCTATT	10.3	7.3e-06	-11828	5137		RHE_RS11865																								RHE_RS18655	5	3861345	3862655	R	24297892	xylA	RHE_RS18655	WP_011426861.1	436	COG2115	G	xylose isomerase	3592
RHE_RS14985	R	RHE_RS28695_m2	R	-91	-82	CTGCGCTACC	10.0	9.7e-06	-11543	5013		RHE_RS11870																								RHE_RS18535	5	3835510	3836607	D	24297936	-	RHE_RS18535	WP_011426838.1	365	COG0523	R	GTP-binding protein	3569
RHE_RS18480	R	RHE_RS28695_m2	R	-36	-27	TTGCGCTACC	10.1	8.9e-06	-11629	5051		RHE_RS11890																								RHE_RS18235	5	3763946	3764800	R	24299179	-	RHE_RS18235	WP_042119009.1	284	COG0583	K	LysR family transcriptional regulator	3509
RHE_RS28695	R	RHE_RS28695_m2	R	-74	-65	TTGCGCTACT	11.9	3.9e-07	-14757	6409		RHE_RS11945																								RHE_RS18090	5	3728032	3728451	D	24299375	-	RHE_RS18090	WP_011426758.1	139	COG1942	Q	tautomerase family protein	3480
RHE_RS00380	D	RHE_RS28695_m3	D	-69	-43	AAAAAGAATTTATTGCAAGAAATAACG	9.3	3.5e-06	-12563	5456		RHE_RS11950																								RHE_RS17605	5	3628721	3629893	D	24298323	-	RHE_RS17605	WP_011426671.1	390	COG0683	E	ABC transporter substrate-binding protein	3384
RHE_RS32675	R	RHE_RS28695_m3	R	-194	-168	GCAAGTACATAGACATAGATCATACCG	8.0	7.9e-06	-11749	5102		RHE_RS11955																								RHE_RS17140	5	3520554	3521297	R	24301595	-	RHE_RS17140	WP_011426584.1	247	COG1028	IQR	KR domain-containing protein	3299
RHE_RS14695	R	RHE_RS28695_m4	R	-53	-36	AAAAGCACAAAGCGTAAA	11.5	1.0e-06	-13816	6000		RHE_RS11975																								RHE_RS16815	5	3449841	3450740	D	24299507	-	RHE_RS16815	WP_042118944.1	299	COG0583	K	LysR family transcriptional regulator	3235
RHE_RS15405	R	RHE_RS28695_m4	R	-62	-45	CAAAGATAGGTCAGTAAT	9.0	8.0e-06	-11736	5097		RHE_RS12025																								RHE_RS16220	5	3327609	3327887	R	24298886	-	RHE_RS16220	WP_011426405.1	92			hypothetical protein	3121
RHE_RS15835	D	RHE_RS28695_m4	D	-171	-154	ACAAGAGGGAGACGTATA	9.5	5.1e-06	-12186	5292		RHE_RS12030																								RHE_RS15650	5	3201538	3202080	R	24301123	-	RHE_RS15650	WP_073990388.1	180	COG3153	R	N-acetyltransferase	3011
RHE_RS06405	D	RHE_RS28695_m5	D	-274	-249	TAGAATTCTGATTGTGAATTACAATC	5.1	9.7e-06	-11543	5013		RHE_RS12035																								RHE_RS15215	5	3115673	3116647	D	24298883	trxB	RHE_RS15215	WP_011426218.1	324	COG0492	O	thioredoxin-disulfide reductase	2930
RHE_RS18505	R	RHE_RS28695_m5	R	-125	-100	GTCTATTAGCCTTTGGCATCAGGATA	5.1	9.7e-06	-11543	5013		RHE_RS12060																								RHE_RS15210	5	3114974	3115441	R	24299723	-	RHE_RS15210	WP_020921868.1	155	COG1522	K	Lrp/AsnC family transcriptional regulator	2929
RHE_RS27240	R	RHE_RS28695_m5	R	-74	-49	CAGAATTACAATACGAACTAACTGTG	5.7	6.9e-06	-11884	5161		RHE_RS12095																								RHE_RS15165	5	3100716	3101744	D	24298784	-	RHE_RS15165	WP_011426208.1	342	COG1063	ER	iditol 2-dehydrogenase	2920
RHE_RS28665	D	RHE_RS28665_m1	D	-93	-78	AGCGTGTCGACAAAGT	15.1	2.6e-08	-17465	7585		RHE_RS12100																								RHE_RS15125	5	3088856	3090061	D	24297838	-	RHE_RS15125	WP_011426200.1	401	COG0505	EF	carbamoyl-phosphate synthase small subunit	2912
RHE_RS28665	D	RHE_RS28665_m1	D	-63	-48	AAATTGCCGACACGCT	10.4	3.6e-06	-12535	5444		RHE_RS12170																								RHE_RS15040	5	3070065	3070784	R	24301244	-	RHE_RS15040	WP_011426183.1	239	COG0664	T	Crp/Fnr family transcriptional regulator	2895
RHE_RS06235	R	RHE_RS28665_m2	R	-81	-57	GCCTGACGGCGGCTTGTTGACAATA	3.9	7.0e-06	-11870	5155		RHE_RS12175																								RHE_RS14985	5	3061354	3061656	R	24298170	-	RHE_RS14985	WP_011426172.1	100			hypothetical protein	2883
RHE_RS06240	D	RHE_RS28665_m2	D	-227	-203	GCCTGACGGCGGCTTGTTGACAATA	3.9	7.0e-06	-11870	5155		RHE_RS12185																								RHE_RS14645	5	2992278	2993219	D	24299057	-	RHE_RS14645	WP_011426109.1	313	COG0741	M	transglycosylase	2817
RHE_RS16615	D	RHE_RS28665_m2	D	-35	-11	TGCCGTCGGCAGGGAGCCGAGAAAA	4.7	4.9e-06	-12226	5310		RHE_RS12205																								RHE_RS14515	5	2961547	2962392	R	24300464	-	RHE_RS14515	WP_041678705.1	281	COG4105	M	outer membrane protein assembly factor BamD	2791
RHE_RS28665	D	RHE_RS28665_m2	D	-103	-79	GCATGTCAACAGCGTGTCGACAAAG	19.9	3.3e-10	-21832	9481		RHE_RS12215																								RHE_RS13820	5	2814898	2815593	D	24297661	-	RHE_RS13820	WP_011425950.1	231	COG0179	Q	FAA hydrolase family protein	2660
RHE_RS16615	D	RHE_RS28665_m3	D	-35	-11	TGCCGTCGGCAGGGAGCCGAGAAAA	7.7	2.3e-06	-12983	5638		RHE_RS12220																								RHE_RS13815	5	2813876	2814628	R	24297662	-	RHE_RS13815	WP_011425949.1	250	COG1708	R	nucleotidyltransferase domain-containing protein	2659
RHE_RS28665	D	RHE_RS28665_m3	D	-103	-79	GCATGTCAACAGCGTGTCGACAAAG	19.7	3.3e-10	-21832	9481		RHE_RS12325																								RHE_RS13695	5	2788896	2789852	D	24300550	-	RHE_RS13695	WP_042118706.1	318	COG0583	K	LysR family transcriptional regulator	2634
RHE_RS02365	D	RHE_RS28665_m4	D	-94	-70	ATGTGCCGTCACCCCACCGGCTAAG	4.8	5.9e-06	-12041	5229		RHE_RS12350																								RHE_RS13290	5	2705860	2706231	R	24300893	-	RHE_RS13290	WP_011425846.1	123			hypothetical protein	2560
RHE_RS16615	D	RHE_RS28665_m4	D	-35	-11	TGCCGTCGGCAGGGAGCCGAGAAAA	5.5	4.3e-06	-12357	5367		RHE_RS12355																								RHE_RS12540	5	2562884	2564497	R	24297867	-	RHE_RS12540	WP_011425709.1	537	COG3507	G	glycoside hydrolase family 43 protein	2420
RHE_RS28665	D	RHE_RS28665_m4	D	-103	-79	GCATGTCAACAGCGTGTCGACAAAG	19.6	4.0e-10	-21640	9398		RHE_RS12415																								RHE_RS12350	5	2532289	2533062	D	24299146	-	RHE_RS12350	WP_011425675.1	257	COG0834	ET	MULTISPECIES: amino acid ABC transporter	2385
RHE_RS03390	D	RHE_RS28665_m5	D	-26	-1	CTGCCAACAAGGGGCAAACATATTAT	7.0	8.6e-06	-11664	5066		RHE_RS12460																								RHE_RS10960	5	2243950	2244699	R	24297483	-	RHE_RS10960	WP_073990381.1	249			GntR family transcriptional regulator	2118
RHE_RS15960	R	RHE_RS28665_m5	R	-68	-43	TAGCCGACAGGTCGCATCAAAAAATT	6.8	9.6e-06	-11554	5018		RHE_RS12490																								RHE_RS10580	5	2158259	2159314	R	24299419	-	RHE_RS10580	WP_011425334.1	351	COG1609	K	LacI family transcriptional regulator	2042
RHE_RS16615	D	RHE_RS28665_m5	D	-33	-8	CCGTCGGCAGGGAGCCGAGAAAAAGG	8.4	3.9e-06	-12455	5409		RHE_RS12520																								RHE_RS10345	5	2111890	2112414	D	24299217	-	RHE_RS10345	WP_042118433.1	174			hypothetical protein	1993
RHE_RS25865	D	RHE_RS28665_m5	D	-212	-187	AAGTCGACAGGGCCATGGAACAATAT	7.1	8.1e-06	-11724	5092		RHE_RS12525																								RHE_RS10285	5	2098671	2098907	R	24298890	-	RHE_RS10285	WP_011425280.1	78			hypothetical protein	1982
RHE_RS28665	D	RHE_RS28665_m5	D	-90	-65	GTGTCGACAAAGTCAAGCGGAAAAAT	19.2	3.5e-10	-21773	9456		RHE_RS12535																								RHE_RS10095	5	2060798	2061850	R	24297894	-	RHE_RS10095	WP_011425250.1	350			hypothetical protein	1942
RHE_RS13345	R	RHE_RS28625_m2	R	-95	-81	GGGGCAACCGTCCAC	10.6	4.4e-06	-12334	5357		RHE_RS12540																								RHE_RS09970	5	2037874	2038737	D	24301536	-	RHE_RS09970	WP_011425229.1	287	COG0115	EH	D-amino-acid transaminase	1919
RHE_RS17840	D	RHE_RS28625_m3	D	-50	-36	CCCGCCGAACTCCTA	9.8	5.1e-06	-12186	5292		RHE_RS12545																								RHE_RS09875	5	2017722	2019116	D	24299545	-	RHE_RS09875	WP_011425210.1	464	COG0022	C	pyruvate dehydrogenase complex E1 component subunit beta	1901
RHE_RS15405	R	RHE_RS28625_m4	R	-115	-106	TGGGAGCCCG	10.3	6.7e-06	-11913	5174		RHE_RS12560																								RHE_RS09575	5	1956871	1958184	R	24300283	-	RHE_RS09575	WP_011425161.1	437			DUF2778 domain-containing protein	1845
RHE_RS12525	R	RHE_RS28625_m5	R	-63	-49	GGAAGAAAAACGGAA	11.3	1.8e-06	-13228	5745		RHE_RS12580																								RHE_RS09025	5	1851350	1852318	D	24300916	-	RHE_RS09025	WP_011425057.1	322	COG0583	K	LysR family transcriptional regulator	1739
RHE_RS14375	R	RHE_RS28625_m5	R	-57	-43	GCAAGGATTACGGCA	10.6	4.3e-06	-12357	5367		RHE_RS12585																								RHE_RS09020	5	1850596	1851210	R	24300361	-	RHE_RS09020	WP_011425056.1	204	COG1182	C	FMN-dependent NADH-azoreductase 1	1738
RHE_RS28625	D	RHE_RS28625_m5	D	-23	-9	CAAAGCAATGCGGAG	10.7	3.8e-06	-12481	5420		RHE_RS12615																								RHE_RS08760	5	1793825	1794712	D	24298672	-	RHE_RS08760	WP_011425005.1	295	COG0583	K	LysR family transcriptional regulator	1688
RHE_RS02810	R	RHE_RS28555_m1	R	-183	-160	GACGTTTACGCAAACGTCAATATT	6.1	4.6e-06	-12289	5337		RHE_RS12620																								RHE_RS08300	5	1703629	1704951	D	24300266	-	RHE_RS08300	WP_011424940.1	440	COG0442	J	proline--tRNA ligase	1600
RHE_RS15430	R	RHE_RS28555_m1	R	-320	-297	GCAGTGTCCACAGGTGGAAAACTC	4.8	8.1e-06	-11724	5092		RHE_RS12670																								RHE_RS08130	5	1674294	1674569	D	24301384	-	RHE_RS08130	WP_003558438.1	91	COG0776	L	MULTISPECIES: DNA-binding protein HRL53	1571
RHE_RS21085	R	RHE_RS28555_m1	R	-114	-91	GAAATCTACACACATGCCACGTAG	5.7	5.3e-06	-12148	5276		RHE_RS12775																								RHE_RS07975	5	1642466	1644640	D	24298462	-	RHE_RS07975	WP_011424889.1	724	COG0455	DN	chain-length determining protein	1541
RHE_RS24095	R	RHE_RS28555_m1	R	-33	-10	TAATTTTACAGCAGTGTCCAAATT	13.2	8.4e-08	-16292	7076		RHE_RS12890																								RHE_RS07685	5	1583044	1583559	D	24299318	-	RHE_RS07685	WP_004673822.1	171	COG1846	K	MULTISPECIES: MarR family transcriptional regulator	1487
RHE_RS28550	R	RHE_RS28555_m1	R	-110	-87	GTTATAGACACTAATGTACATTTT	20.4	1.5e-10	-22620	9824		RHE_RS12915																								RHE_RS07290	5	1498951	1500441	R	24299557	-	RHE_RS07290	WP_011424763.1	496	COG0034	F	amidophosphoribosyltransferase	1407
RHE_RS28550	R	RHE_RS28555_m1	R	-68	-45	GCAATGTACATATGTGTCAACATT	20.4	1.5e-10	-22620	9824		RHE_RS12920																								RHE_RS07050	5	1454103	1456178	R	24298447	-	RHE_RS07050	WP_011424716.1	691	COG0741	M	lytic transglycosylase domain-containing protein	1358
RHE_RS28555	D	RHE_RS28555_m1	D	-106	-83	GCAATGTACATATGTGTCAACATT	20.4	1.5e-10	-22620	9824		RHE_RS12925																								RHE_RS06640	5	1349339	1351987	R	24301202	-	RHE_RS06640	WP_011424637.1	882	COG0308	E	aminopeptidase N	1276
RHE_RS28555	D	RHE_RS28555_m1	D	-64	-41	GTTATAGACACTAATGTACATTTT	20.4	1.5e-10	-22620	9824		RHE_RS12940																								RHE_RS05615	5	1148966	1149673	D	24299985	-	RHE_RS05615	WP_011424442.1	235			hypothetical protein	1078
RHE_RS28655	R	RHE_RS28555_m1	R	-158	-135	AAAATGGACACGCCTGTACATTTT	15.6	1.6e-08	-17951	7796		RHE_RS12965																								RHE_RS05190	5	1074761	1075954	R	24299572	-	RHE_RS05190	WP_042118041.1	397	COG2814	G	tetracycline resistance MFS efflux pump	998
RHE_RS18760	D	RHE_RS28555_m2	D	-106	-85	CTGATTGACATAAGTGTCACAC	4.5	5.6e-06	-12093	5252		RHE_RS12970																								RHE_RS05175	5	1069824	1070510	D	24298406	-	RHE_RS05175	WP_011424366.1	228	COG1842	KT	PspA/IM30 family protein	995
RHE_RS24095	R	RHE_RS28555_m2	R	-31	-10	TAATTTTACAGCAGTGTCCAAA	3.3	9.4e-06	-11575	5027		RHE_RS12990																								RHE_RS05170	5	1069095	1069712	R	24298407	-	RHE_RS05170	WP_011424365.1	205	COG1309	K	TetR/AcrR family transcriptional regulator	994
RHE_RS28550	R	RHE_RS28555_m2	R	-118	-97	CTAATGTACATTTTTCTTGTGC	6.7	1.8e-06	-13228	5745		RHE_RS13020																								RHE_RS04595	5	962175	964091	R	24299061	-	RHE_RS04595	WP_011424260.1	638	COG1154	HI	1-deoxy-D-xylulose-5-phosphate synthase	881
RHE_RS28550	R	RHE_RS28555_m2	R	-66	-45	GCAATGTACATATGTGTCAACA	25.0	5.4e-13	-28247	12268		RHE_RS13025																								RHE_RS04570	5	956341	957159	R	24298571	-	RHE_RS04570	WP_011424255.1	272	COG1028	IQR	oxidoreductase	876
RHE_RS28555	D	RHE_RS28555_m2	D	-106	-85	GCAATGTACATATGTGTCAACA	25.0	5.4e-13	-28247	12268		RHE_RS13050																								RHE_RS04420	5	918248	919588	R	24298742	-	RHE_RS04420	WP_011424226.1	446	COG1914	P	divalent metal cation transporter	846
RHE_RS28555	D	RHE_RS28555_m2	D	-54	-33	CTAATGTACATTTTTCTTGTGC	6.7	1.8e-06	-13228	5745		RHE_RS13060																								RHE_RS03980	5	828116	829390	D	24298671	-	RHE_RS03980	WP_042117959.1	424	COG3307	M	O-antigen ligase domain-containing protein	758
RHE_RS28655	R	RHE_RS28555_m2	R	-156	-135	AAAATGGACACGCCTGTACATT	6.0	2.6e-06	-12860	5585		RHE_RS13070																								RHE_RS03720	5	772463	772945	D	24300176	rirA	RHE_RS03720	WP_011424096.1	160	COG1959	K	MULTISPECIES: transcriptional regulator	710
RHE_RS07290	R	RHE_RS28555_m3	R	-226	-207	GGGTCAAGCTCTTGAACACT	9.5	8.7e-06	-11652	5060		RHE_RS13135																								RHE_RS03545	5	721164	721517	D	24300639	-	RHE_RS03545	WP_020920408.1	117			MULTISPECIES: hypothetical protein	679
RHE_RS13975	R	RHE_RS28555_m3	R	-73	-54	ATGTCAATAATACTGACCTA	10.3	4.4e-06	-12334	5357		RHE_RS13170																								RHE_RS03275	5	669101	669847	D	24300699	-	RHE_RS03275	WP_042117883.1	248	COG2771	K	LuxR family transcriptional regulator	625
RHE_RS13980	D	RHE_RS28555_m3	D	-331	-312	ATGTCAATAATACTGACCTA	10.3	4.4e-06	-12334	5357		RHE_RS13180																								RHE_RS03085	5	627353	628084	R	24300395	-	RHE_RS03085	WP_011423975.1	243	COG2186	K	FadR family transcriptional regulator	587
RHE_RS18295	R	RHE_RS28555_m3	R	-102	-83	GTGTCGATGCGCTAGACAGC	9.6	8.1e-06	-11724	5092		RHE_RS13190																								RHE_RS03040	5	618817	619410	R	24299793	-	RHE_RS03040	WP_042117869.1	197	COG1309	K	TetR/AcrR family transcriptional regulator	578
RHE_RS26015	R	RHE_RS28555_m3	R	-43	-24	ATGTCGTTATCAGTGACATG	9.6	8.7e-06	-11652	5060		RHE_RS13195																								RHE_RS02770	5	563786	564418	D	24301080	-	RHE_RS02770	WP_011423917.1	210	COG1284	S	YitT family protein	527
RHE_RS28550	R	RHE_RS28555_m3	R	-98	-79	AGGTCATTGTTATAGACACT	14.9	1.8e-08	-17833	7745		RHE_RS13215																								RHE_RS02765	5	563154	563654	R	24301081	-	RHE_RS02765	WP_004672867.1	166	COG1959	K	MULTISPECIES: Rrf2 family transcriptional regulator	526
RHE_RS28550	R	RHE_RS28555_m3	R	-77	-58	GTGTCAACATTGAAAACATG	15.1	1.3e-08	-18158	7886		RHE_RS13235																								RHE_RS02055	5	420338	420913	D	24298075	raiA	RHE_RS02055	WP_020920235.1	191	COG1544	J	MULTISPECIES: ribosome-associated translation inhibitor RaiA	392
RHE_RS28555	D	RHE_RS28555_m3	D	-93	-74	GTGTCAACATTGAAAACATG	15.1	1.3e-08	-18158	7886		RHE_RS13290																								RHE_RS02045	5	417495	419054	D	24298077	rpoN	RHE_RS02045	WP_011423785.1	519	COG1508	K	RNA polymerase sigma-54 factor	390
RHE_RS28555	D	RHE_RS28555_m3	D	-72	-53	AGGTCATTGTTATAGACACT	14.9	1.8e-08	-17833	7745		RHE_RS13295																								RHE_RS01740	5	354643	355554	D	24298621	-	RHE_RS01740	WP_011423728.1	303	COG0583	K	LysR family transcriptional regulator	329
RHE_RS15430	R	RHE_RS28555_m4	R	-320	-297	GCAGTGTCCACAGGTGGAAAACTC	4.8	7.2e-06	-11841	5143		RHE_RS13345																								RHE_RS01430	5	293168	293611	D	24301601	-	RHE_RS01430	WP_042117749.1	147	COG1846	K	MarR family transcriptional regulator	272
RHE_RS21085	R	RHE_RS28555_m4	R	-114	-91	GAAATCTACACACATGCCACGTAG	5.9	4.5e-06	-12311	5347		RHE_RS13410																								RHE_RS01080	5	225828	227219	D	24299690	-	RHE_RS01080	WP_011423606.1	463	COG0260	E	leucyl aminopeptidase	204
RHE_RS24095	R	RHE_RS28555_m4	R	-33	-10	TAATTTTACAGCAGTGTCCAAATT	13.5	6.2e-08	-16596	7208		RHE_RS13450																								RHE_RS01075	5	224847	225686	R	24299233	-	RHE_RS01075	WP_011423605.1	279	COG5010	UW	hypothetical protein	203
RHE_RS28550	R	RHE_RS28555_m4	R	-110	-87	GTTATAGACACTAATGTACATTTT	19.2	6.3e-10	-21185	9201		RHE_RS13580																								RHE_RS01035	5	216152	216967	D	24299797	cpaB	RHE_RS01035	WP_011423597.1	271	COG3745	UW	Flp pilus assembly protein CpaB	195
RHE_RS28550	R	RHE_RS28555_m4	R	-68	-45	GCAATGTACATATGTGTCAACATT	20.8	9.5e-11	-23077	10022		RHE_RS13695																								RHE_RS00550	5	115899	116414	D	24300694	fabA	RHE_RS00550	WP_011423503.1	171	COG0764	I	3-hydroxyacyl	100
RHE_RS28555	D	RHE_RS28555_m4	D	-106	-83	GCAATGTACATATGTGTCAACATT	20.8	9.5e-11	-23077	10022		RHE_RS13730																								RHE_RS00365	5	76501	77019	D	24297932	-	RHE_RS00365	WP_011423468.1	172			DUF995 domain-containing protein	64
RHE_RS28555	D	RHE_RS28555_m4	D	-64	-41	GTTATAGACACTAATGTACATTTT	19.2	6.3e-10	-21185	9201		RHE_RS13740																								RHE_RS30095	4	151474	152439	D	24297343	-	RHE_RS30095	WP_008534397.1	321	COG2207	K	MULTISPECIES: AraC family transcriptional regulator	5794
RHE_RS28655	R	RHE_RS28555_m4	R	-158	-135	AAAATGGACACGCCTGTACATTTT	15.5	1.7e-08	-17890	7770		RHE_RS13745																								RHE_RS29335	4	622446	622661	R	24302776	-	RHE_RS29335	WP_011428858.1	71	COG3905	K	CopG family transcriptional regulator	5647
RHE_RS23695	R	RHE_RS28555_m5	R	-167	-156	CACATGTACATT	10.3	4.6e-06	-12289	5337		RHE_RS13750																								RHE_RS28865	4	528482	530656	R	24302870	-	RHE_RS28865	WP_011428774.1	724	COG4774	P	TonB-dependent siderophore receptor	5557
RHE_RS28550	R	RHE_RS28555_m5	R	-108	-97	CTAATGTACATT	13.1	3.0e-07	-15019	6523		RHE_RS13770																								RHE_RS28350	4	416971	418161	R	24302973	-	RHE_RS28350	WP_011428675.1	396	COG0006	E	aminopeptidase P family protein	5456
RHE_RS28550	R	RHE_RS28555_m5	R	-56	-45	GCAATGTACATA	12.0	7.7e-07	-14077	6114		RHE_RS13800																								RHE_RS28225	4	386846	387790	D	24302998	-	RHE_RS28225	WP_011428652.1	314	COG2084	I	NAD(P)-dependent oxidoreductase	5432
RHE_RS28555	D	RHE_RS28555_m5	D	-106	-95	GCAATGTACATA	12.0	7.7e-07	-14077	6114		RHE_RS13805																								RHE_RS28220	4	385641	386639	R	24302999	-	RHE_RS28220	WP_020919586.1	332	COG1609	K	LacI family DNA-binding transcriptional regulator	5431
RHE_RS28555	D	RHE_RS28555_m5	D	-54	-43	CTAATGTACATT	13.1	3.0e-07	-15019	6523		RHE_RS13815																								RHE_RS28020	4	344627	345355	D	24303039	-	RHE_RS28020	WP_020919624.1	242	COG2186	K	FadR family transcriptional regulator	5391
RHE_RS04720	D	RHE_RS28545_m1	D	-168	-145	AGCGGCCGCGAGGCGGACGCGGGG	10.8	7.0e-07	-14172	6155		RHE_RS13820																								RHE_RS27920	4	319840	320472	D	24303059	-	RHE_RS27920	WP_011428594.1	210	COG1309	K	TetR/AcrR family transcriptional regulator	5372
RHE_RS07480	R	RHE_RS28545_m1	R	-140	-117	AGACGCCGTTGATTGGCCTCTCGT	10.4	9.0e-07	-13921	6046		RHE_RS13915																								RHE_RS27915	4	318654	319727	R	24303060	-	RHE_RS27915	WP_011428593.1	357	COG0845	MV	efflux RND transporter periplasmic adaptor subunit	5371
RHE_RS27645	D	RHE_RS28545_m1	D	-136	-113	ACAGGCCGCGTCGCGGCCGGTGAT	9.9	1.2e-06	-13633	5921		RHE_RS13960																								RHE_RS27810	4	284683	290982	R	24303081	-	RHE_RS27810	WP_011428572.1	2099	COG0745	TK	diguanylate cyclase	5351
RHE_RS28545	R	RHE_RS28545_m1	R	-40	-17	ATCGGCCGACAGGCGGCCTCTCTT	21.3	2.4e-11	-24453	10620		RHE_RS13965																								RHE_RS27150	4	145011	145559	D	24303213	-	RHE_RS27150	WP_011428446.1	182	COG4420	S	DUF1003 domain-containing protein	5220
RHE_RS29525	D	RHE_RS28545_m1	D	-43	-20	GTCCGCCGACAACCGGCGGCGCTT	6.8	7.8e-06	-11761	5108		RHE_RS13975																								RHE_RS26950	4	103080	104036	D	24303253	-	RHE_RS26950	WP_011428411.1	318			hypothetical protein	5178
RHE_RS28545	R	RHE_RS28545_m2	R	-33	-20	GGCCGACAGGCGGC	11.0	3.1e-06	-12684	5509		RHE_RS13980																								RHE_RS26680	4	54673	55200	D	24303307	-	RHE_RS26680	WP_011428363.1	175	COG1595	K	RNA polymerase sigma factor	5126
RHE_RS04025	D	RHE_RS28545_m3	D	-157	-146	GGGGGGAATGGC	9.7	3.7e-06	-12507	5432		RHE_RS14020																								RHE_RS26115	4	440314	441060	R	24302340	-	RHE_RS26115	WP_011428251.1	248	COG2186	K	FadR family transcriptional regulator	5012
RHE_RS17930	D	RHE_RS28545_m3	D	-41	-30	GTAGGGGATGGC	11.0	1.2e-06	-13633	5921		RHE_RS14050																								RHE_RS25605	4	339943	340566	D	24302442	-	RHE_RS25605	WP_011428157.1	207	COG1309	K	TetR/AcrR family transcriptional regulator	4912
RHE_RS30785	D	RHE_RS28545_m3	D	-337	-326	GAAGGGGATGGC	9.6	4.2e-06	-12380	5377		RHE_RS14055																								RHE_RS25595	4	339020	339547	D	24302444	-	RHE_RS25595	WP_011428155.1	175	COG5631	K	transcriptional regulator	4910
RHE_RS15015	D	RHE_RS28545_m4	D	-200	-188	AGCCGAGTGTCGG	10.3	4.2e-06	-12380	5377		RHE_RS14100																								RHE_RS25455	4	308167	309120	R	24302472	-	RHE_RS25455	WP_011428127.1	317	COG0583	K	LysR family transcriptional regulator	4882
RHE_RS10960	R	RHE_RS28510_m1	R	-54	-40	TATGTATACAATGTT	10.8	1.9e-06	-13174	5721		RHE_RS14115																								RHE_RS25320	4	279267	280166	D	24302499	-	RHE_RS25320	WP_011428103.1	299	COG1273	L	Ku protein	4857
RHE_RS18480	R	RHE_RS28510_m1	R	-89	-75	GAATTACACAATGAC	9.3	5.7e-06	-12075	5244		RHE_RS14135																								RHE_RS25290	4	272834	273556	D	24302505	-	RHE_RS25290	WP_011428097.1	240	COG2186	K	FadR family transcriptional regulator	4851
RHE_RS28510	R	RHE_RS28510_m1	R	-116	-102	AGAAAACACAATTTT	12.3	5.7e-07	-14378	6244		RHE_RS14150																								RHE_RS24980	4	214520	215446	D	24302567	-	RHE_RS24980	WP_011428041.1	308	COG2207	K	AraC family transcriptional regulator	4794
RHE_RS28510	R	RHE_RS28510_m1	R	-94	-80	TGCGTACACAATCAG	13.6	1.7e-07	-15587	6770		RHE_RS14160																								RHE_RS24760	4	170016	170915	D	24302611	-	RHE_RS24760	WP_011428000.1	299	COG0583	K	LysR family transcriptional regulator	4752
RHE_RS15875	D	RHE_RS28510_m2	D	-372	-347	CATAGTTTATGCAAATTGCACAAAAT	2.2	2.6e-06	-12860	5585		RHE_RS14165																								RHE_RS24755	4	169034	169897	R	24302612	-	RHE_RS24755	WP_011427999.1	287	COG0702	R	NmrA family transcriptional regulator	4751
RHE_RS25865	D	RHE_RS28510_m2	D	-187	-162	TAATCTATAAAATCTGTAGACAATAA	0.6	5.2e-06	-12167	5284		RHE_RS14175																								RHE_RS24455	4	96590	99151	R	24302672	-	RHE_RS24455	WP_011427942.1	853	COG0404	E	FAD-dependent oxidoreductase	4691
RHE_RS28510	R	RHE_RS28510_m2	R	-115	-90	ATCAGTATTCATAGAAAACACAATTT	12.8	1.2e-08	-18238	7921		RHE_RS14185																								RHE_RS24270	4	63098	64810	R	24302709	-	RHE_RS24270	WP_011427907.1	570	COG0633	C	adenylate/guanylate cyclase domain-containing protein	4652
RHE_RS28510	R	RHE_RS28510_m2	R	-93	-68	AATTGTGTACTTTGCGTACACAATCA	28.5	3.0e-14	-31138	13523		RHE_RS14210																								RHE_RS23540	4	148583	149104	D	24302141	-	RHE_RS23540	WP_011427764.1	173	COG1595	K	RNA polymerase sigma factor	4508
RHE_RS06955	R	RHE_RS28510_m3	R	-147	-131	ATATAGGCTAAGTACAG	1.0	8.9e-06	-11629	5051		RHE_RS14215																								RHE_RS23535	4	147406	148317	R	24302142	-	RHE_RS23535	WP_011427763.1	303	COG0657	I	alpha/beta hydrolase	4507
RHE_RS28510	R	RHE_RS28510_m3	R	-88	-72	GTGTACTTTGCGTACAC	22.5	4.7e-11	-23781	10328		RHE_RS14275																								RHE_RS23520	4	142893	143678	R	24302145	-	RHE_RS23520	WP_011427760.1	261			XRE family transcriptional regulator	4504
RHE_RS00340	D	RHE_RS28510_m4	D	-289	-263	ACAATTTGTACTGAAATATTACATTCA	-3.1	9.5e-06	-11564	5022		RHE_RS14315																								RHE_RS23450	4	125700	126890	R	24302159	fdhA	RHE_RS23450	WP_011427745.1	396	COG1063	ER	formaldehyde dehydrogenase, glutathione-independent	4489
RHE_RS02955	D	RHE_RS28510_m4	D	-79	-53	TGATTGTGTAGTTTCCGCCCAAATTTT	-2.8	8.4e-06	-11687	5076		RHE_RS14325																								RHE_RS23445	4	124785	125591	D	24302160	-	RHE_RS23445	WP_011427744.1	268	COG0834	ET	amino acid ABC transporter substrate-binding protein	4488
RHE_RS15875	D	RHE_RS28510_m4	D	-373	-347	TCATAGTTTATGCAAATTGCACAAAAT	1.0	1.7e-06	-13285	5770		RHE_RS14355																								RHE_RS23380	4	113762	114844	D	24302173	-	RHE_RS23380	WP_042119733.1	360	COG1064	G	alcohol dehydrogenase AdhP	4479
RHE_RS25865	D	RHE_RS28510_m4	D	-188	-162	ATAATCTATAAAATCTGTAGACAATAA	0.1	2.5e-06	-12899	5602		RHE_RS14375																								RHE_RS23055	4	38022	39080	D	24302238	-	RHE_RS23055	WP_011427668.1	352	COG1609	K	LacI family transcriptional regulator	4414
RHE_RS28510	R	RHE_RS28510_m4	R	-115	-89	AATCAGTATTCATAGAAAACACAATTT	4.0	4.6e-07	-14592	6337		RHE_RS14390																								RHE_RS21355	4	57174	57914	D	24301821	-	RHE_RS21355	WP_011427357.1	246	COG0745	TK	MULTISPECIES: DNA-binding response regulator	4111
RHE_RS28510	R	RHE_RS28510_m4	R	-93	-67	CAATTGTGTACTTTGCGTACACAATCA	29.9	1.0e-14	-32236	14000		RHE_RS14475																								RHE_RS21035	4	4365855	4367765	R	24297812	prpE	RHE_RS21035	WP_011427294.1	636	COG0365	I	propionyl-CoA synthetase	4055
RHE_RS10760	R	RHE_RS28510_m5	R	-66	-46	GCAAATCAAGAATTTTGCACA	3.9	4.7e-06	-12268	5328		RHE_RS14490																								RHE_RS21030	4	4364887	4365588	D	24297813	-	RHE_RS21030	WP_010019544.1	233	COG3820	S	MULTISPECIES: DUF1013 domain-containing protein	4054
RHE_RS28510	R	RHE_RS28510_m5	R	-78	-58	AGGAGTCAACAATTGTGTACT	26.7	1.3e-13	-29671	12886		RHE_RS14515																								RHE_RS20595	4	4266876	4267403	D	24297880	-	RHE_RS20595	WP_020922561.1	175	COG1846	K	MarR family transcriptional regulator	3972
RHE_RS28775	R	RHE_RS28510_m5	R	-72	-52	CGGATTCGATAATTTAGTATT	6.6	1.2e-06	-13633	5921		RHE_RS14540																								RHE_RS20560	4	4256922	4260101	D	24300776	-	RHE_RS20560	WP_042119351.1	1059			helicase	3965
RHE_RS28450	R	RHE_RS28450_m1	R	-38	-18	CGCATGATAAAAACTTATGCG	20.7	6.7e-11	-23426	10174		RHE_RS14615																								RHE_RS20540	4	4252469	4253044	R	24301254	phaR	RHE_RS20540	WP_011427204.1	191	COG5394	QT	polyhydroxyalkanoate synthesis repressor PhaR	3960
RHE_RS28455	D	RHE_RS28450_m1	D	-98	-78	CGCATGATAAAAACTTATGCG	20.7	6.7e-11	-23426	10174		RHE_RS14640																								RHE_RS20405	4	4216868	4218511	D	24298499	-	RHE_RS20405	WP_011427180.1	547	COG0747	E	ABC transporter substrate-binding protein	3933
RHE_RS16615	D	RHE_RS28450_m2	D	-122	-102	GCCTCGCATCAGCTGCTATCT	3.2	5.2e-06	-12167	5284		RHE_RS14645																								RHE_RS20395	4	4214518	4215543	D	24297584	-	RHE_RS20395	WP_011427178.1	341	COG1172	G	ABC transporter permease	3931
RHE_RS26415	D	RHE_RS28450_m2	D	-126	-106	CCGTCGCGGAAGCCTTTCTCA	2.8	6.6e-06	-11928	5180		RHE_RS14685																								RHE_RS20380	4	4211079	4211576	R	24300861	-	RHE_RS20380	WP_011427175.1	165	COG3812	S	DUF1993 domain-containing protein	3928
RHE_RS28455	D	RHE_RS28450_m2	D	-22	-2	CTCTCACATAAGAGGTTCTCA	6.1	1.3e-06	-13553	5886		RHE_RS14695																								RHE_RS20095	4	4159157	4160110	R	24298804	-	RHE_RS20095	WP_011427121.1	317	COG2984	R	ABC transporter substrate-binding protein	3869
RHE_RS08150	R	RHE_RS28450_m3	R	-127	-116	TTCAACCGCAAT	10.9	6.0e-06	-12024	5222		RHE_RS14710																								RHE_RS19840	4	4110863	4111798	D	24299957	-	RHE_RS19840	WP_011427074.1	311	COG4973	L	tyrosine recombinase XerC	3819
RHE_RS08320	D	RHE_RS28450_m3	D	-290	-279	TGCAAGCGCAAA	10.9	5.2e-06	-12167	5284		RHE_RS14720																								RHE_RS19835	4	4109776	4110726	R	24300004	-	RHE_RS19835	WP_042119068.1	316	COG0204	I	acyltransferase	3818
RHE_RS09865	D	RHE_RS28450_m3	D	-19	-8	TTCAAGAGCATA	11.6	2.5e-06	-12899	5602		RHE_RS14740																								RHE_RS19765	4	4094865	4095671	D	24300413	-	RHE_RS19765	WP_011427059.1	268	COG0600	P	ABC transporter permease	3804
RHE_RS28450	R	RHE_RS28450_m3	R	-84	-73	TGCAAGAGCAAT	11.2	3.9e-06	-12455	5409		RHE_RS14770																								RHE_RS19545	4	4047126	4047407	D	24300643	-	RHE_RS19545	WP_041678914.1	93	COG0271	T	MULTISPECIES: BolA family transcriptional regulator	3762
RHE_RS28455	D	RHE_RS28450_m3	D	-43	-32	TGCAAGAGCAAT	11.2	3.9e-06	-12455	5409		RHE_RS14820																								RHE_RS19540	4	4046403	4047020	R	24299209	-	RHE_RS19540	WP_042119057.1	205	COG0484	O	molecular chaperone DnaJ	3761
RHE_RS20960	D	RHE_RS28450_m4	D	-348	-336	GGCATGACAAAAC	10.3	8.2e-06	-11711	5086		RHE_RS14830																								RHE_RS19375	4	4015660	4016238	D	24299167	-	RHE_RS19375	WP_011426990.1	192	COG2096	H	cob(I)yrinic acid a,c-diamide adenosyltransferase	3728
RHE_RS28450	R	RHE_RS28450_m4	R	-30	-18	CGCATGATAAAAA	11.1	2.6e-06	-12860	5585		RHE_RS14875																								RHE_RS19330	4	4009543	4009833	R	24300235	-	RHE_RS19330	WP_011426981.1	96			hypothetical protein	3719
RHE_RS28455	D	RHE_RS28450_m4	D	-98	-86	CGCATGATAAAAA	11.1	2.6e-06	-12860	5585		RHE_RS14885																								RHE_RS18505	4	3829653	3830759	R	24300221	-	RHE_RS18505	WP_011426832.1	368	COG4663	Q	ABC transporter substrate-binding protein	3563
RHE_RS08350	D	RHE_RS28450_m5	D	-61	-43	CGCATGTGCCTTTCTCATG	11.1	1.4e-06	-13479	5854		RHE_RS14905																								RHE_RS18480	4	3823463	3823687	R	24298432	-	RHE_RS18480	WP_011426827.1	74			MULTISPECIES: aa3-type cytochrome c oxidase subunit IV	3558
RHE_RS11535	R	RHE_RS28370_m1	R	-47	-34	ACTTTTGTAAAAAC	9.2	6.8e-06	-11899	5167		RHE_RS14920																								RHE_RS18135	4	3735539	3737080	R	24300386	-	RHE_RS18135	WP_011426766.1	513	COG2204	T	sigma-54-dependent Fis family transcriptional regulator	3489
RHE_RS11540	D	RHE_RS28370_m1	D	-102	-89	ACTTTTGTAAAAAC	9.2	6.8e-06	-11899	5167		RHE_RS14965																								RHE_RS17450	4	3590784	3591827	D	24299449	-	RHE_RS17450	WP_011426640.1	347	COG1609	K	LacI family transcriptional regulator	3353
RHE_RS16220	R	RHE_RS28370_m1	R	-60	-47	AATCTTGCAAATGT	11.9	1.5e-06	-13410	5824		RHE_RS14985																								RHE_RS17060	4	3499342	3499989	R	24300637	-	RHE_RS17060	WP_011426568.1	215	COG5385	S	MULTISPECIES: histidine phosphotransferase	3283
RHE_RS20315	R	RHE_RS28370_m1	R	-215	-202	AAATTTGCAAATAT	11.3	2.4e-06	-12940	5620		RHE_RS15015																								RHE_RS16675	4	3426545	3426952	D	24300838	-	RHE_RS16675	WP_011426493.1	135	COG2346	P	globin	3208
RHE_RS24075	R	RHE_RS28370_m1	R	-174	-161	GCTTTTGCAAGGGT	10.2	3.6e-06	-12535	5444		RHE_RS15025																								RHE_RS16615	4	3414996	3416012	D	24298704	-	RHE_RS16615	WP_011426481.1	338	COG0451	M	UDP-glucuronic acid epimerase	3196
RHE_RS28370	D	RHE_RS28370_m1	D	-16	-3	ACTCTTGCAAATTT	12.4	1.1e-06	-13720	5959		RHE_RS15040																								RHE_RS16120	4	3303747	3304775	D	24298619	-	RHE_RS16120	WP_011426386.1	342	COG1609	K	LacI family DNA-binding transcriptional regulator	3101
RHE_RS07005	R	RHE_RS28370_m2	R	-204	-181	GATCCTTTAAATTTCGCGAGAGGT	6.3	5.4e-06	-12129	5268		RHE_RS15070																								RHE_RS16115	4	3302638	3303576	R	24298857	-	RHE_RS16115	WP_086005031.1	312	COG0329	EM	dihydrodipicolinate synthase family protein	3100
RHE_RS07690	D	RHE_RS28370_m2	D	-140	-117	TCGCATCGCAATCTTGTGATGCGG	6.2	5.7e-06	-12075	5244		RHE_RS15090																								RHE_RS15980	4	3273339	3275678	D	24300239	xdhB	RHE_RS15980	WP_011426361.1	779	COG4631	F	xanthine dehydrogenase molybdopterin binding subunit	3073
RHE_RS16220	R	RHE_RS28370_m2	R	-69	-46	GAATCTTGCAAATGTGAAAGAGTC	7.4	3.0e-06	-12717	5523		RHE_RS15110																								RHE_RS15960	4	3268697	3269071	R	24300273	-	RHE_RS15960	WP_011426357.1	124	COG3795	S	YciI family protein	3069
RHE_RS30570	R	RHE_RS28370_m2	R	-142	-119	CGTTATAGCAAATATTTGAGAGTT	7.3	3.2e-06	-12652	5495		RHE_RS15125																								RHE_RS15555	4	3181805	3182035	D	24301485	-	RHE_RS15555	WP_011426281.1	76			CopG family transcriptional regulator	2994
RHE_RS00410	R	RHE_RS28370_m3	R	-16	-5	TTTCCTCCCTGC	9.2	9.0e-06	-11618	5046		RHE_RS15165																								RHE_RS14695	4	3004354	3005094	R	24298403	-	RHE_RS14695	WP_011426119.1	246	COG3719	J	ribonuclease	2827
RHE_RS02165	D	RHE_RS28370_m3	D	-158	-147	ACTCCTCCCCTC	9.3	8.1e-06	-11724	5092		RHE_RS15185																								RHE_RS14355	4	2922699	2923601	D	24301520	-	RHE_RS14355	WP_011426052.1	300	COG0583	K	LysR family transcriptional regulator	2761
RHE_RS06050	R	RHE_RS28370_m3	R	-209	-198	TCTTCTCCCCGG	9.8	5.9e-06	-12041	5229		RHE_RS15190																								RHE_RS14020	4	2850525	2852273	R	24300975	-	RHE_RS14020	WP_042118725.1	582	COG0510	H	hypothetical protein	2697
RHE_RS12025	R	RHE_RS28370_m3	R	-16	-5	TTTCCTCCCTGC	9.2	9.0e-06	-11618	5046		RHE_RS15195																								RHE_RS13915	4	2831499	2831801	R	24300631	-	RHE_RS13915	WP_011425967.1	100			hypothetical protein	2678
RHE_RS16200	R	RHE_RS28370_m3	R	-120	-109	TCTCCTCCACGA	10.2	4.1e-06	-12405	5387		RHE_RS15200																								RHE_RS13135	4	2678521	2678733	D	24301262	-	RHE_RS13135	WP_011425820.1	70	COG1278	K	cold-shock protein	2532
RHE_RS16205	D	RHE_RS28370_m3	D	-167	-156	TCTCCTCCACGA	10.2	4.1e-06	-12405	5387		RHE_RS15210																								RHE_RS12620	4	2582103	2582894	D	24300665	-	RHE_RS12620	WP_042118605.1	263	COG2207	K	AraC family transcriptional regulator	2435
RHE_RS16660	R	RHE_RS28370_m3	R	-103	-92	TCTCCTCCACGT	9.2	9.0e-06	-11618	5046		RHE_RS15215																								RHE_RS12615	4	2580447	2581877	R	24301271	-	RHE_RS12615	WP_042118602.1	476	COG0362	G	MULTISPECIES: phosphogluconate dehydrogenase (NADP(+)-dependent, decarboxylating)	2434
RHE_RS21035	R	RHE_RS28370_m3	R	-16	-5	GCTCCTCCCCAG	11.4	1.5e-06	-13410	5824		RHE_RS15225																								RHE_RS12220	4	2503210	2504256	D	24300997	-	RHE_RS12220	WP_011425651.1	348	COG2896	H	cyclic pyranopterin monophosphate synthase	2363
RHE_RS24110	R	RHE_RS28370_m3	R	-24	-13	TTTCCTCCCCTA	11.1	1.9e-06	-13174	5721		RHE_RS15305																								RHE_RS12215	4	2502653	2503027	R	24300710	-	RHE_RS12215	WP_020921463.1	124	COG3536	S	MULTISPECIES: DUF971 domain-containing protein	2362
RHE_RS26575	R	RHE_RS28370_m3	R	-17	-6	TATCCTCCCCAG	10.5	3.2e-06	-12652	5495		RHE_RS15360																								RHE_RS12205	4	2500863	2501330	D	24297934	-	RHE_RS12205	WP_011425648.1	155	COG1846	K	MarR family transcriptional regulator	2360
RHE_RS27520	R	RHE_RS28370_m3	R	-16	-5	TCTCCTCCCAGA	12.1	9.3e-07	-13888	6032		RHE_RS15375																								RHE_RS12095	4	2474842	2475531	R	24300939	bluB	RHE_RS12095	WP_011425627.1	229	COG0778	C	5,6-dimethylbenzimidazole synthase	2338
RHE_RS27525	D	RHE_RS28370_m3	D	-271	-260	TCTCCTCCCAGA	12.1	9.3e-07	-13888	6032		RHE_RS15385																								RHE_RS11890	4	2428995	2430026	D	24299191	-	RHE_RS11890	WP_042118552.1	343			flagellar biosynthesis protein FliO	2299
RHE_RS28005	R	RHE_RS28370_m3	R	-19	-8	TCTCCTCCCTGT	9.3	8.1e-06	-11724	5092		RHE_RS15405																								RHE_RS11870	4	2422674	2423762	R	24297736	recA	RHE_RS11870	WP_011425583.1	362	COG0468	L	MULTISPECIES: DNA recombination/repair protein RecA	2295
RHE_RS28010	D	RHE_RS28370_m3	D	-205	-194	TCTCCTCCCTGT	9.3	8.1e-06	-11724	5092		RHE_RS15415																								RHE_RS11645	4	2380890	2381654	D	24301235	-	RHE_RS11645	WP_011425538.1	254	COG0152	F	MULTISPECIES: phosphoribosylaminoimidazolesuccinocarboxamide synthase	2250
RHE_RS28350	R	RHE_RS28370_m3	R	-18	-7	TTTCCTCCCAGG	12.2	8.5e-07	-13978	6071		RHE_RS15430																								RHE_RS11525	4	2355679	2356356	D	24297708	-	RHE_RS11525	WP_011425515.1	225	COG2945	R	alpha/beta hydrolase	2228
RHE_RS28370	D	RHE_RS28370_m3	D	-54	-43	GTTCCTCCCCAG	10.4	3.6e-06	-12535	5444		RHE_RS15450																								RHE_RS11370	4	2325858	2326577	D	24300053	-	RHE_RS11370	WP_011425484.1	239	COG0321	H	lipoate-protein ligase B	2196
RHE_RS04065	R	RHE_RS28370_m4	R	-67	-50	GCCACTATTGGGAAAGTG	9.3	9.1e-06	-11607	5041		RHE_RS15500																								RHE_RS11340	4	2321563	2321949	R	24299669	-	RHE_RS11340	WP_029531229.1	128	COG0789	K	MULTISPECIES: MerR family DNA-binding transcriptional regulator	2191
RHE_RS04070	D	RHE_RS28370_m4	D	-95	-78	GCCACTATTGGGAAAGTG	9.3	9.1e-06	-11607	5041		RHE_RS15515																								RHE_RS11280	4	2310709	2311323	D	24298455	-	RHE_RS11280	WP_042118507.1	204	COG5388	S	PAS domain-containing protein	2179
RHE_RS26070	D	RHE_RS28370_m4	D	-262	-245	CCCACGAATAGGCAAACC	11.7	1.0e-06	-13816	6000		RHE_RS15555																								RHE_RS10660	4	2175009	2176577	D	24299371	-	RHE_RS10660	WP_011425349.1	522	COG3845	R	ABC transporter ATP-binding protein	2058
RHE_RS28370	D	RHE_RS28370_m4	D	-38	-21	TCCACCACGGGGCAAGCG	14.1	7.2e-08	-16447	7143		RHE_RS15560																								RHE_RS10650	4	2173250	2173978	D	24299416	-	RHE_RS10650	WP_011425347.1	242	COG1183	I	phosphatidylcholine/phosphatidylserine synthase	2056
RHE_RS29775	R	RHE_RS28370_m5	R	-76	-58	AACCCACTGATCGGGGAGT	9.5	4.5e-06	-12311	5347		RHE_RS15570																								RHE_RS10645	4	2172092	2172904	R	24299417	-	RHE_RS10645	WP_011425346.1	270	COG1018	C	ferredoxin--NADP reductase	2055
RHE_RS28340	D	RHE_RS28340_m1	D	-81	-66	TTAAATCGTATAGGAT	14.8	6.6e-08	-16534	7180		RHE_RS15585																								RHE_RS10640	4	2171429	2172043	D	24298640	-	RHE_RS10640	WP_011425345.1	204	COG1802	K	GntR family transcriptional regulator	2054
RHE_RS03610	D	RHE_RS28340_m2	D	-180	-165	TAAAAACCGATATCAG	7.5	7.4e-06	-11814	5131		RHE_RS15605																								RHE_RS09865	4	2016193	2016513	D	24301664	-	RHE_RS09865	WP_011425208.1	106	COG2919	D	MULTISPECIES: septum formation initiator family protein	1899
RHE_RS12095	R	RHE_RS28340_m3	R	-76	-54	TCTTGCCAGGCCGGTCTTCTGAC	5.5	8.2e-06	-11711	5086		RHE_RS15650																								RHE_RS09625	4	1966649	1967725	R	24299478	-	RHE_RS09625	WP_086005021.1	358	COG3108	S	DUF882 domain-containing protein	1852
RHE_RS26635	D	RHE_RS28340_m3	D	-53	-31	TCTCGGCACGGAAAACTGTTAGG	7.5	2.6e-06	-12860	5585		RHE_RS15675																								RHE_RS09475	4	1941473	1942954	D	24299413	gatA	RHE_RS09475	WP_011425143.1	493	COG0154	J	Asp-tRNA(Asn)/Glu-tRNA(Gln) amidotransferase GatCAB subunit A	1827
RHE_RS11740	R	RHE_RS28340_m5	R	-150	-134	TACAATACGTTAAATCA	7.7	7.8e-06	-11761	5108		RHE_RS15695																								RHE_RS09445	4	1938515	1939174	D	24297790	-	RHE_RS09445	WP_042118314.1	219	COG1309	K	TetR/AcrR family transcriptional regulator	1822
RHE_RS02675	D	RHE_RS28305_m1	D	-61	-42	GAGGCAGCCGCTTCTGCTGA	9.5	7.9e-06	-11749	5102		RHE_RS15725																								RHE_RS09325	4	1911790	1912410	D	24298760	tatB	RHE_RS09325	WP_011425114.1	206			twin-arginine translocase subunit TatB	1797
RHE_RS09250	D	RHE_RS28305_m1	D	-285	-266	CCCGCAGCAGAAGATGCCGA	9.4	8.5e-06	-11675	5071		RHE_RS15755																								RHE_RS09250	4	1892797	1893459	D	24300581	-	RHE_RS09250	WP_042119235.1	220	COG2518	O	protein-L-isoaspartate O-methyltransferase	1782
RHE_RS17450	D	RHE_RS28305_m1	D	-58	-39	CAAGCAGAAAGAGCTGCTAT	10.1	5.3e-06	-12148	5276		RHE_RS15775																								RHE_RS09175	4	1884931	1885230	D	24301638	-	RHE_RS09175	WP_011425087.1	99			hypothetical protein	1768
RHE_RS18085	R	RHE_RS28305_m1	R	-69	-50	TCAGCATCATCGTGTGCTGC	10.5	3.5e-06	-12563	5456		RHE_RS15800																								RHE_RS09160	4	1881449	1882405	D	24300741	-	RHE_RS09160	WP_011425084.1	318	COG0741	M	glycosyl transferase	1765
RHE_RS18090	D	RHE_RS28305_m1	D	-72	-53	TCAGCATCATCGTGTGCTGC	10.5	3.5e-06	-12563	5456		RHE_RS15835																								RHE_RS09015	4	1849974	1850549	D	24300362	-	RHE_RS09015	WP_011425055.1	191	COG1309	K	TetR/AcrR family transcriptional regulator	1737
RHE_RS26445	D	RHE_RS28305_m1	D	-216	-197	CCCGCACCTGATGGTGCGGC	10.5	3.5e-06	-12563	5456		RHE_RS15875																								RHE_RS08925	4	1826968	1827468	R	24299358	-	RHE_RS08925	WP_011425037.1	166	COG1522	K	Lrp/AsnC family transcriptional regulator	1719
RHE_RS28305	R	RHE_RS28305_m1	R	-56	-37	GAAGCATAATCTGCTGCGGC	13.2	2.3e-07	-15285	6638		RHE_RS15885																								RHE_RS07645	4	1575738	1577993	D	24300102	parC	RHE_RS07645	WP_011424832.1	751	COG0188	L	DNA topoisomerase IV subunit A	1480
RHE_RS28305	R	RHE_RS28305_m1	R	-53	-34	GACGAAGCATAATCTGCTGC	11.2	1.9e-06	-13174	5721		RHE_RS15890																								RHE_RS07480	4	1538983	1539567	R	24297891	-	RHE_RS07480	WP_011424799.1	194	COG1309	K	TetR/AcrR family transcriptional regulator	1446
RHE_RS02675	D	RHE_RS28305_m2	D	-61	-42	GAGGCAGCCGCTTCTGCTGA	9.9	6.5e-06	-11944	5187		RHE_RS15905																								RHE_RS07365	4	1513717	1514454	D	24299228	fabG	RHE_RS07365	WP_011424777.1	245	COG1028	IQR	3-oxoacyl	1423
RHE_RS08535	D	RHE_RS28305_m2	D	-243	-224	GAGGCGGCATTTACTGCCTC	9.8	6.5e-06	-11944	5187		RHE_RS15925																								RHE_RS07245	4	1490876	1492489	R	24300802	-	RHE_RS07245	WP_011424754.1	537	COG0119	E	citramalate synthase	1398
RHE_RS09250	D	RHE_RS28305_m2	D	-285	-266	CCCGCAGCAGAAGATGCCGA	10.3	4.2e-06	-12380	5377		RHE_RS15950																								RHE_RS06825	4	1392332	1393198	R	24297694	-	RHE_RS06825	WP_011424674.1	288	COG0583	K	LysR family transcriptional regulator	1314
RHE_RS18085	R	RHE_RS28305_m2	R	-69	-50	TCAGCATCATCGTGTGCTGC	9.9	5.9e-06	-12041	5229		RHE_RS15960																								RHE_RS06705	4	1367619	1368092	D	24298374	-	RHE_RS06705	WP_042119214.1	157	COG1522	K	MULTISPECIES: Lrp/AsnC family transcriptional regulator	1289
RHE_RS18090	D	RHE_RS28305_m2	D	-72	-53	TCAGCATCATCGTGTGCTGC	9.9	5.9e-06	-12041	5229		RHE_RS15965																								RHE_RS06700	4	1366570	1367472	R	24297959	-	RHE_RS06700	WP_011424649.1	300	COG0697	GER	EamA/RhaT family transporter	1288
RHE_RS26445	D	RHE_RS28305_m2	D	-216	-197	CCCGCACCTGATGGTGCGGC	9.8	6.5e-06	-11944	5187		RHE_RS15980																								RHE_RS06135	4	1251452	1252069	D	24299594	-	RHE_RS06135	WP_011424536.1	205	COG1309	K	TetR/AcrR family transcriptional regulator	1176
RHE_RS28305	R	RHE_RS28305_m2	R	-165	-146	AAGACGGAATCTTCTGCTGT	10.1	5.1e-06	-12186	5292		RHE_RS15995																								RHE_RS05935	4	1209168	1210535	R	24298966	-	RHE_RS05935	WP_011424497.1	455	COG3420	P	TIGR03808 family TAT-translocated repetitive protein	1135
RHE_RS28305	R	RHE_RS28305_m2	R	-56	-37	GAAGCATAATCTGCTGCGGC	12.4	5.5e-07	-14413	6260		RHE_RS16100																								RHE_RS05735	4	1173008	1173928	D	24299753	-	RHE_RS05735	WP_011424463.1	306	COG0583	K	LysR family transcriptional regulator	1099
RHE_RS28305	R	RHE_RS28305_m2	R	-53	-34	GACGAAGCATAATCTGCTGC	12.4	5.5e-07	-14413	6260		RHE_RS16115																								RHE_RS05515	4	1131345	1131647	D	24299013	-	RHE_RS05515	WP_042118071.1	100			hypothetical protein	1059
RHE_RS28305	R	RHE_RS28305_m3	R	-169	-146	AAGACGGAATCTTCTGCTGTCGCT	10.6	2.3e-06	-12983	5638		RHE_RS16120																								RHE_RS05510	4	1130821	1131150	R	24299014	-	RHE_RS05510	WP_011424422.1	109	COG0640	K	transcriptional regulator	1058
RHE_RS28305	R	RHE_RS28305_m3	R	-98	-75	AACACATGGCAAGGAGGTGTCGAC	16.2	7.3e-09	-18735	8137		RHE_RS16135																								RHE_RS05105	4	1057622	1058527	D	24301278	-	RHE_RS05105	WP_011424354.1	301			DUF1499 domain-containing protein	982
RHE_RS28665	D	RHE_RS28305_m3	D	-106	-83	GAGGCATGTCAACAGCGTGTCGAC	12.0	7.0e-07	-14172	6155		RHE_RS16180																								RHE_RS04380	4	911355	911873	D	24301510	-	RHE_RS04380	WP_011424218.1	172	COG1216	G	glycosyl transferase	838
RHE_RS16615	D	RHE_RS28305_m4	D	-152	-141	GCAGCATAATGT	11.5	1.6e-06	-13346	5796		RHE_RS16185																								RHE_RS04375	4	910058	911215	R	24301511	-	RHE_RS04375	WP_011424217.1	385	COG1533	L	radical SAM protein	837
RHE_RS24475	R	RHE_RS28305_m4	R	-40	-29	GCAGCACAAAAT	11.7	1.2e-06	-13633	5921		RHE_RS16200																								RHE_RS04090	4	851211	851885	R	24299003	-	RHE_RS04090	WP_011424162.1	224	COG3637	M	porin family protein	781
RHE_RS24480	D	RHE_RS28305_m4	D	-220	-209	GCAGCACAAAAT	11.7	1.2e-06	-13633	5921		RHE_RS16205																								RHE_RS04015	4	835810	836565	D	24299064	-	RHE_RS04015	WP_011424147.1	251	COG1028	IQR	KR domain-containing protein	766
RHE_RS25540	R	RHE_RS28305_m4	R	-96	-85	GCAGCATAATCG	10.8	3.8e-06	-12481	5420		RHE_RS16220																								RHE_RS04010	4	834800	835717	R	24299065	-	RHE_RS04010	WP_042117962.1	305	COG0583	K	LysR family transcriptional regulator	765
RHE_RS25545	D	RHE_RS28305_m4	D	-118	-107	GCAGCATAATCG	10.8	3.8e-06	-12481	5420		RHE_RS16230																								RHE_RS03995	4	831551	832543	D	24300425	-	RHE_RS03995	WP_011424143.1	330	COG0491	R	MBL fold metallo-hydrolase	761
RHE_RS28305	R	RHE_RS28305_m4	R	-128	-117	GAAGCACAAATG	10.7	4.0e-06	-12429	5398		RHE_RS16235																								RHE_RS03640	4	745830	747782	D	24297526	-	RHE_RS03640	WP_011424082.1	650	COG0365	I	acetoacetate--CoA ligase	698
RHE_RS28305	R	RHE_RS28305_m4	R	-48	-37	GAAGCATAATCT	11.1	2.7e-06	-12822	5569		RHE_RS16325																								RHE_RS03635	4	743689	745581	R	24300978	-	RHE_RS03635	WP_011424081.1	630	COG2982	M	AsmA family protein	697
RHE_RS08550	D	RHE_RS28305_m5	D	-155	-142	CGCAGGATTTTATG	10.6	3.7e-06	-12507	5432		RHE_RS16340																								RHE_RS03620	4	740784	741926	D	24301183	-	RHE_RS03620	WP_011424078.1	380	COG3842	E	ABC transporter ATP-binding protein	694
RHE_RS27310	R	RHE_RS28305_m5	R	-61	-48	AGCAGCCTATTATT	10.9	2.9e-06	-12751	5538		RHE_RS16345																								RHE_RS03485	4	707463	708026	D	24300758	-	RHE_RS03485	WP_011424053.1	187	COG3951	N	hypothetical protein	667
RHE_RS09130	R	RHE_RS28220_m1	R	-109	-90	GTTTGACTGCGCTGTCAACT	5.7	1.1e-06	-13720	5959		RHE_RS16350																								RHE_RS03380	4	685189	687105	R	24301092	-	RHE_RS03380	WP_042117898.1	638	COG3914	O	glycosyl transferase	646
RHE_RS09130	R	RHE_RS28220_m1	R	-86	-67	AGTTGATAGCGCTAGCAAAT	9.4	2.1e-07	-15376	6678		RHE_RS16415																								RHE_RS03290	4	671097	672176	R	24301359	flhB	RHE_RS03290	WP_042119162.1	359	COG1377	N	flagellar biosynthesis protein FlhB	628
RHE_RS17020	D	RHE_RS28220_m1	D	-103	-84	TTTTAGTAGGGTTACCAACA	0.5	8.8e-06	-11641	5056		RHE_RS16480																								RHE_RS03175	4	648102	648479	D	24300681	-	RHE_RS03175	WP_011423992.1	125	COG0745	TK	response regulator	605
RHE_RS28220	R	RHE_RS28220_m1	R	-183	-164	GAATGGCAGCGCTGCCAAAA	19.7	6.0e-10	-21234	9222		RHE_RS16530																								RHE_RS02855	4	585662	586219	D	24301089	-	RHE_RS02855	WP_020920333.1	185	COG1309	K	TetR family transcriptional regulator	544
RHE_RS28220	R	RHE_RS28220_m1	R	-129	-110	TTTTGGCAGCGCTGCCATTT	20.1	4.1e-10	-21615	9387		RHE_RS16565																								RHE_RS02780	4	567001	567726	D	24297704	-	RHE_RS02780	WP_020920327.1	241	COG1407	R	metallophosphoesterase	529
RHE_RS28225	D	RHE_RS28220_m1	D	-101	-82	TTTTGGCAGCGCTGCCATTT	20.1	4.1e-10	-21615	9387		RHE_RS16615																								RHE_RS01925	4	391775	392341	R	24298312	-	RHE_RS01925	WP_011423763.1	188	COG0694	O	NifU family protein	366
RHE_RS28225	D	RHE_RS28220_m1	D	-47	-28	GAATGGCAGCGCTGCCAAAA	19.7	6.0e-10	-21234	9222		RHE_RS16660																								RHE_RS01735	4	353753	354517	R	24298622	-	RHE_RS01735	WP_011423727.1	254	COG1028	IQR	3-oxoacyl-ACP reductase	328
RHE_RS04235	D	RHE_RS28220_m2	D	-93	-70	CATCCTGGCAGCCCTGACAAAGAA	0.9	7.4e-06	-11814	5131		RHE_RS16670																								RHE_RS01660	4	333968	334432	D	24300225	-	RHE_RS01660	WP_011423712.1	154	COG1522	K	Lrp/AsnC family transcriptional regulator	314
RHE_RS09130	R	RHE_RS28220_m2	R	-111	-88	CGGTTTGACTGCGCTGTCAACTAT	4.4	1.9e-06	-13174	5721		RHE_RS16675																								RHE_RS01630	4	327589	328536	D	24300471	-	RHE_RS01630	WP_011423706.1	315	COG0189	HJ	glutathione synthase	309
RHE_RS09130	R	RHE_RS28220_m2	R	-88	-65	ATAGTTGATAGCGCTAGCAAATCC	7.8	4.2e-07	-14683	6377		RHE_RS16700																								RHE_RS00990	4	209064	209633	R	24299084	-	RHE_RS00990	WP_011423588.1	189	COG3577	R	TIGR02281 family clan AA aspartic protease	186
RHE_RS17020	D	RHE_RS28220_m2	D	-105	-82	CGTTTTAGTAGGGTTACCAACACC	1.8	5.3e-06	-12148	5276		RHE_RS16735																								RHE_RS00740	4	153088	155004	R	24298019	-	RHE_RS00740	WP_011423539.1	638	COG0443	O	molecular chaperone DnaK	138
RHE_RS28220	R	RHE_RS28220_m2	R	-185	-162	AAGAATGGCAGCGCTGCCAAAATG	20.2	3.3e-10	-21832	9481		RHE_RS16755																								RHE_RS00285	4	56550	57128	R	24299273	-	RHE_RS00285	WP_011423459.1	192	COG4567	TK	MULTISPECIES: DNA-binding response regulator	55
RHE_RS28220	R	RHE_RS28220_m2	R	-131	-108	TTTTTTGGCAGCGCTGCCATTTGA	20.0	3.9e-10	-21665	9409		RHE_RS16760																								RHE_RS00275	4	55180	55863	R	24299749	-	RHE_RS00275	WP_011423457.1	227	COG1376	M	MULTISPECIES: L,D-transpeptidase	53
RHE_RS28225	D	RHE_RS28220_m2	D	-103	-80	TTTTTTGGCAGCGCTGCCATTTGA	20.0	3.9e-10	-21665	9409		RHE_RS16800																								RHE_RS30900	3	314052	314495	D	24297461	-	RHE_RS30900	WP_004674399.1	147	COG3794	C	MULTISPECIES: pseudoazurin	5941
RHE_RS28225	D	RHE_RS28220_m2	D	-49	-26	AAGAATGGCAGCGCTGCCAAAATG	20.2	3.3e-10	-21832	9481		RHE_RS16815																								RHE_RS30795	3	294375	294791	R	24297240	-	RHE_RS30795	WP_010020624.1	138			MULTISPECIES: cupin domain-containing protein	5920
RHE_RS04235	D	RHE_RS28220_m3	D	-92	-70	ATCCTGGCAGCCCTGACAAAGAA	1.0	8.8e-06	-11641	5056		RHE_RS16825																								RHE_RS30745	3	285210	285884	R	24297464	-	RHE_RS30745	WP_029875595.1	224			MULTISPECIES: transcriptional regulator	5912
RHE_RS09130	R	RHE_RS28220_m3	R	-111	-89	GGTTTGACTGCGCTGTCAACTAT	6.4	9.3e-07	-13888	6032		RHE_RS16870																								RHE_RS29525	3	24763	26118	D	24297383	-	RHE_RS29525	WP_011053299.1	451	COG0265	O	MULTISPECIES: PDZ domain-containing protein	5684
RHE_RS09130	R	RHE_RS28220_m3	R	-88	-66	TAGTTGATAGCGCTAGCAAATCC	10.2	1.6e-07	-15648	6796		RHE_RS16935																								RHE_RS29380	3	630574	631620	R	24302767	-	RHE_RS29380	WP_011428866.1	348	COG0673	R	gfo/Idh/MocA family oxidoreductase	5656
RHE_RS28220	R	RHE_RS28220_m3	R	-185	-163	AGAATGGCAGCGCTGCCAAAATG	20.4	2.9e-10	-21961	9538		RHE_RS16945																								RHE_RS29085	3	575423	575866	D	24302826	-	RHE_RS29085	WP_011428813.1	147	COG3794	C	pseudoazurin	5597
RHE_RS28220	R	RHE_RS28220_m3	R	-131	-109	TTTTTGGCAGCGCTGCCATTTGA	19.8	5.0e-10	-21416	9301		RHE_RS17010																								RHE_RS29045	3	566860	568428	R	24302834	ccoG	RHE_RS29045	WP_011428806.1	522	COG0348	C	cytochrome c oxidase accessory protein CcoG	5590
RHE_RS28225	D	RHE_RS28220_m3	D	-102	-80	TTTTTGGCAGCGCTGCCATTTGA	19.8	5.0e-10	-21416	9301		RHE_RS17020																								RHE_RS28855	3	526765	527682	D	24302872	-	RHE_RS28855	WP_011428772.1	305	COG2207	K	AraC family transcriptional regulator	5555
RHE_RS28225	D	RHE_RS28220_m3	D	-48	-26	AGAATGGCAGCGCTGCCAAAATG	20.4	2.9e-10	-21961	9538		RHE_RS17030																								RHE_RS28850	3	525920	526669	R	24302873	-	RHE_RS28850	WP_011428771.1	249	COG1028	IQR	SDR family NAD(P)-dependent oxidoreductase	5554
RHE_RS04235	D	RHE_RS28220_m4	D	-93	-70	CATCCTGGCAGCCCTGACAAAGAA	0.7	9.6e-06	-11554	5018		RHE_RS17045																								RHE_RS28370	3	420757	421419	D	24302969	-	RHE_RS28370	WP_086005059.1	220	COG1309	K	TetR/AcrR family transcriptional regulator	5460
RHE_RS09130	R	RHE_RS28220_m4	R	-111	-88	CGGTTTGACTGCGCTGTCAACTAT	6.0	1.1e-06	-13720	5959		RHE_RS17050																								RHE_RS28045	3	350037	350705	R	24303034	-	RHE_RS28045	WP_011428618.1	222	COG0745	TK	DNA-binding response regulator	5396
RHE_RS09130	R	RHE_RS28220_m4	R	-88	-65	ATAGTTGATAGCGCTAGCAAATCC	9.5	2.3e-07	-15285	6638		RHE_RS17055																								RHE_RS27875	3	308200	308562	D	24303068	-	RHE_RS27875	WP_011428585.1	120			hypothetical protein	5364
RHE_RS28220	R	RHE_RS28220_m4	R	-185	-162	AAGAATGGCAGCGCTGCCAAAATG	20.4	2.8e-10	-21996	9553		RHE_RS17060																								RHE_RS27660	3	253248	254198	D	24303111	-	RHE_RS27660	WP_011428545.1	316	COG0329	EM	dihydrodipicolinate synthase family protein	5319
RHE_RS28220	R	RHE_RS28220_m4	R	-131	-108	TTTTTTGGCAGCGCTGCCATTTGA	20.0	4.0e-10	-21640	9398		RHE_RS17085																								RHE_RS27570	3	233212	233445	R	24303129	-	RHE_RS27570	WP_011428527.1	77	COG2002	KV	AbrB family transcriptional regulator	5302
RHE_RS28225	D	RHE_RS28220_m4	D	-103	-80	TTTTTTGGCAGCGCTGCCATTTGA	20.0	4.0e-10	-21640	9398		RHE_RS17090																								RHE_RS27070	3	129436	131328	D	24303229	-	RHE_RS27070	WP_011428431.1	630	COG0326	O	molecular chaperone HtpG	5201
RHE_RS28225	D	RHE_RS28220_m4	D	-49	-26	AAGAATGGCAGCGCTGCCAAAATG	20.4	2.8e-10	-21996	9553		RHE_RS17095																								RHE_RS27050	3	125727	126500	D	24303233	-	RHE_RS27050	WP_011428428.1	257	COG0664	T	Crp/Fnr family transcriptional regulator	5197
RHE_RS04235	D	RHE_RS28220_m5	D	-92	-70	ATCCTGGCAGCCCTGACAAAGAA	0.8	8.8e-06	-11641	5056		RHE_RS17115																								RHE_RS26795	3	73511	73915	D	24303284	-	RHE_RS26795	WP_011428383.1	134	COG0784	T	response regulator	5148
RHE_RS09130	R	RHE_RS28220_m5	R	-111	-89	GGTTTGACTGCGCTGTCAACTAT	6.2	9.8e-07	-13836	6009		RHE_RS17135																								RHE_RS26790	3	72240	73412	D	24303285	-	RHE_RS26790	WP_011428382.1	390	COG0664	T	transcriptional regulator	5147
RHE_RS09130	R	RHE_RS28220_m5	R	-88	-66	TAGTTGATAGCGCTAGCAAATCC	9.5	2.1e-07	-15376	6678		RHE_RS17140																								RHE_RS26465	3	9305	10216	D	24303350	-	RHE_RS26465	WP_011428321.1	303	COG0583	K	LysR family transcriptional regulator	5083
RHE_RS28220	R	RHE_RS28220_m5	R	-185	-163	AGAATGGCAGCGCTGCCAAAATG	20.4	2.9e-10	-21961	9538		RHE_RS17145																								RHE_RS26425	3	709	1602	D	24303358	-	RHE_RS26425	WP_011428313.1	297	COG0414	H	pantoate--beta-alanine ligase	5075
RHE_RS28220	R	RHE_RS28220_m5	R	-131	-109	TTTTTGGCAGCGCTGCCATTTGA	19.8	5.0e-10	-21416	9301		RHE_RS17170																								RHE_RS23470	3	130057	131046	R	24302155	-	RHE_RS23470	WP_011427750.1	329	COG4977	K	GlxA family transcriptional regulator	4494
RHE_RS28225	D	RHE_RS28220_m5	D	-102	-80	TTTTTGGCAGCGCTGCCATTTGA	19.8	5.0e-10	-21416	9301		RHE_RS17190																								RHE_RS23385	3	115092	115814	D	24302172	-	RHE_RS23385	WP_011427734.1	240	COG0517	T	CBS domain-containing protein	4480
RHE_RS28225	D	RHE_RS28220_m5	D	-48	-26	AGAATGGCAGCGCTGCCAAAATG	20.4	2.9e-10	-21961	9538		RHE_RS17195																								RHE_RS23080	3	44447	44824	R	24302233	-	RHE_RS23080	WP_042119708.1	125	COG1733	K	transcriptional regulator	4419
RHE_RS28045	R	RHE_RS28045_m1	R	-31	-6	ATCCCCTTAGCACGTGCGGAGGGGCT	29.5	3.8e-15	-33204	14420		RHE_RS17200																								RHE_RS22915	3	11320	11508	D	24302266	-	RHE_RS22915	WP_011427640.1	62			hypothetical protein	4386
RHE_RS00300	R	RHE_RS28045_m2	R	-65	-36	CTAGCGAGTGAGGCGCCCCATAGGCAAGCA	3.9	5.7e-06	-12075	5244		RHE_RS17305																								RHE_RS21415	3	69670	69960	D	24301809	-	RHE_RS21415	WP_086005036.1	96			helix-turn-helix domain-containing protein	4118
RHE_RS15755	D	RHE_RS28045_m2	D	-37	-8	ATAGCGTTAACATTGAGGCTGCCGGAGGCG	6.9	1.2e-06	-13633	5921		RHE_RS17405																								RHE_RS21205	3	23982	25016	R	24301851	-	RHE_RS21205	WP_011427325.1	344	COG2390	K	MULTISPECIES: sugar-binding transcriptional regulator	4088
RHE_RS23665	R	RHE_RS28045_m2	R	-88	-59	CGATCTCGAATAGATGGGCAGACGCAAGCC	3.5	6.6e-06	-11928	5180		RHE_RS17450																								RHE_RS20930	3	4337491	4339377	R	24298852	-	RHE_RS20930	WP_011427276.1	628	COG0477	GEPR	MFS transporter	4036
RHE_RS28045	R	RHE_RS28045_m2	R	-41	-12	TTAGCACGTGCGGAGGGGCTCGCGGAAGCA	28.8	9.0e-15	-32342	14046		RHE_RS17565																								RHE_RS20765	3	4307166	4307483	D	24299631	rplU	RHE_RS20765	WP_007824851.1	105	COG0261	J	MULTISPECIES: 50S ribosomal protein L21	4005
RHE_RS28340	D	RHE_RS28045_m2	D	-37	-8	CTAGCGATTGAAGCTGTCAAGAGGCAAGGC	3.2	7.6e-06	-11787	5119		RHE_RS17595																								RHE_RS20725	3	4297643	4299181	D	24300149	-	RHE_RS20725	WP_011427241.1	512	COG1012	C	aldehyde dehydrogenase family protein	3998
RHE_RS04190	D	RHE_RS28045_m3	D	-138	-109	TATCGGCCCGGCCTTCCGCGCGCGCTAAGC	10.4	3.1e-07	-14987	6509		RHE_RS17605																								RHE_RS20715	3	4294854	4296266	D	24300193	-	RHE_RS20715	WP_011427239.1	470	COG5383	R	DUF1338 domain-containing protein	3996
RHE_RS18520	R	RHE_RS28045_m3	R	-36	-7	CCTCCTCCAGGCAGCACGCAAGCAGCAAGG	5.2	6.4e-06	-11959	5194		RHE_RS17640																								RHE_RS20710	3	4293842	4294750	R	24299916	-	RHE_RS20710	WP_011427238.1	302	COG0583	K	LysR family transcriptional regulator	3995
RHE_RS27460	R	RHE_RS28045_m3	R	-49	-20	CATCCGTCAGCGAGTATGCGCGCCCTCAGC	8.4	1.1e-06	-13720	5959		RHE_RS17660																								RHE_RS20450	3	4233183	4233536	R	24298233	-	RHE_RS20450	WP_011427187.1	117	COG0346	Q	glyoxalase	3942
RHE_RS01735	R	RHE_RS28045_m4	R	-74	-64	GGCATTTTCCT	11.0	9.1e-07	-13910	6041		RHE_RS17710																								RHE_RS20400	3	4215711	4216769	D	24297583	-	RHE_RS20400	WP_011427179.1	352	COG2355	E	peptidase	3932
RHE_RS01740	D	RHE_RS28045_m4	D	-66	-56	GGCATTTTCCT	11.0	9.1e-07	-13910	6041		RHE_RS17720																								RHE_RS20285	3	4193915	4194598	D	24300121	-	RHE_RS20285	WP_011427159.1	227	COG0745	TK	MULTISPECIES: DNA-binding response regulator	3910
RHE_RS07275	R	RHE_RS28045_m4	R	-270	-260	GCCATTTTCGT	10.3	7.0e-06	-11870	5155		RHE_RS17755																								RHE_RS20280	3	4193225	4193746	R	24300122	-	RHE_RS20280	WP_011427158.1	173	COG3786	M	hypothetical protein	3909
RHE_RS09990	R	RHE_RS28045_m4	R	-247	-237	GGCATATTCTG	10.2	8.3e-06	-11699	5081		RHE_RS17765																								RHE_RS20150	3	4169130	4169858	D	24301434	-	RHE_RS20150	WP_011427131.1	242	COG0670	R	BAX inhibitor (BI)-1/YccA family protein	3881
RHE_RS09995	D	RHE_RS28045_m4	D	-35	-25	GGCATATTCTG	10.2	8.3e-06	-11699	5081		RHE_RS17770																								RHE_RS19440	3	4028855	4029514	D	24300955	ftsE	RHE_RS19440	WP_041678766.1	219	COG2884	D	cell division ATP-binding protein FtsE	3741
RHE_RS11840	R	RHE_RS28045_m4	R	-57	-47	GCCATTTTCCG	10.3	7.0e-06	-11870	5155		RHE_RS17835																								RHE_RS19275	3	3995954	3998668	D	24300143	-	RHE_RS19275	WP_011426971.1	904	COG0653	U	protein translocase subunit SecA	3709
RHE_RS14210	R	RHE_RS28045_m4	R	-340	-330	GCCATTTTCCG	10.3	7.0e-06	-11870	5155		RHE_RS17840																								RHE_RS19270	3	3994826	3995707	R	24298360	-	RHE_RS19270	WP_011426970.1	293	COG0760	O	peptidylprolyl isomerase	3708
RHE_RS14215	D	RHE_RS28045_m4	D	-107	-97	GCCATTTTCCG	10.3	7.0e-06	-11870	5155		RHE_RS17915																								RHE_RS19020	3	3943129	3943551	D	24300374	-	RHE_RS19020	WP_011426929.1	140	COG0789	K	MULTISPECIES: MerR family DNA-binding transcriptional regulator	3664
RHE_RS28045	R	RHE_RS28045_m5	R	-190	-173	GTATGGCTTCATGATCAA	16.2	2.4e-10	-22150	9620		RHE_RS17930																								RHE_RS19015	3	3940811	3943057	R	24300543	-	RHE_RS19015	WP_011426928.1	748	COG2217	P	heavy metal translocating P-type ATPase	3663
RHE_RS29075	D	RHE_RS28045_m5	D	-161	-144	GAATGGCTCCTTGATCTA	11.1	1.8e-06	-13228	5745		RHE_RS17980																								RHE_RS18930	3	3921344	3922528	D	24299675	-	RHE_RS18930	WP_011426914.1	394	COG5285	Q	phytanoyl-CoA dioxygenase	3646
RHE_RS28020	D	RHE_RS28020_m1	D	-87	-69	ATACATGTGTGATGAATCG	19.1	6.0e-10	-21234	9222		RHE_RS18010																								RHE_RS18525	3	3833979	3834491	R	24298401	-	RHE_RS18525	WP_020922291.1	170	COG1846	K	MarR family transcriptional regulator	3567
RHE_RS18895	R	RHE_RS28020_m2	R	-87	-58	AGTTATGTTAAATCATCATACCAGTCAATT	8.8	5.0e-06	-12206	5301		RHE_RS18015																								RHE_RS18270	3	3770009	3770371	D	24298694	-	RHE_RS18270	WP_003542883.1	120	COG2204	T	MULTISPECIES: response regulator	3516
RHE_RS18900	D	RHE_RS28020_m2	D	-154	-125	AGTTATGTTAAATCATCATACCAGTCAATT	8.8	5.0e-06	-12206	5301		RHE_RS18035																								RHE_RS18190	3	3748673	3749668	R	24299947	-	RHE_RS18190	WP_011426777.1	331	COG0517	T	KpsF/GutQ family sugar-phosphate isomerase	3500
RHE_RS27570	R	RHE_RS28020_m2	R	-64	-35	AGGTATTGCTACATTCGGCAAAATTCAAAG	8.0	8.5e-06	-11675	5071		RHE_RS18085																								RHE_RS17840	3	3677794	3678330	D	24300876	-	RHE_RS17840	WP_011426714.1	178	COG1396	K	XRE family transcriptional regulator	3430
RHE_RS01870	R	RHE_RS28020_m3	R	-103	-80	TAAATATATCTTTATATCTATGGC	9.7	8.2e-06	-11711	5086		RHE_RS18090																								RHE_RS17720	3	3653305	3654525	D	24300927	-	RHE_RS17720	WP_011426691.1	406	COG0451	M	NAD-dependent dehydratase	3406
RHE_RS04735	R	RHE_RS28020_m3	R	-170	-147	CTAATCACTTCTTATTTCTATGGA	12.3	4.6e-07	-14592	6337		RHE_RS18100																								RHE_RS17640	3	3635085	3636284	R	24298576	-	RHE_RS17640	WP_042118981.1	399	COG0482	J	tRNA 2-thiouridine(34) synthase MnmA	3390
RHE_RS09720	D	RHE_RS28020_m3	D	-112	-89	AAAATCGTGCTAAAAAACCATGGT	10.6	3.3e-06	-12622	5481		RHE_RS18110																								RHE_RS17195	3	3534005	3535153	D	24298573	-	RHE_RS17195	WP_011426595.1	382	COG1960	I	monooxygenase	3310
RHE_RS26435	R	RHE_RS28020_m3	R	-51	-28	TAAATCCAACTTAAAATTATTGAA	10.6	3.3e-06	-12622	5481		RHE_RS18125																								RHE_RS17190	3	3533063	3533800	R	24300219	-	RHE_RS17190	WP_011426594.1	245	COG0639	T	serine/threonine protein phosphatase	3309
RHE_RS26440	D	RHE_RS28020_m3	D	-121	-98	TAAATCCAACTTAAAATTATTGAA	10.6	3.3e-06	-12622	5481		RHE_RS18135																								RHE_RS17030	3	3495857	3496132	D	24298710	-	RHE_RS17030	WP_007533628.1	91			MULTISPECIES: DUF1153 domain-containing protein	3277
RHE_RS16100	R	RHE_RS28020_m4	R	-250	-221	TCCATTGAAATAATGACGAAAATTTAATGC	2.4	7.9e-06	-11749	5102		RHE_RS18145																								RHE_RS16345	3	3353716	3354864	D	24301341	-	RHE_RS16345	WP_042118917.1	382	COG1680	V	class C beta-lactamase	3144
RHE_RS17835	D	RHE_RS28020_m4	D	-41	-12	TCCATTGTGTCCGATATCATTATGTTATAA	3.7	4.2e-06	-12380	5377		RHE_RS18160																								RHE_RS16340	3	3352684	3353586	R	24301342	-	RHE_RS16340	WP_011426428.1	300	COG0583	K	LysR family transcriptional regulator	3143
RHE_RS28020	D	RHE_RS28020_m4	D	-113	-84	CGCATTGAAATGAAGACAGATTTGTCATAC	18.6	6.8e-10	-21109	9167		RHE_RS18180																								RHE_RS15995	3	3277045	3277941	D	24300166	-	RHE_RS15995	WP_042118871.1	298	COG0583	K	LysR family transcriptional regulator	3077
RHE_RS08785	D	RHE_RS28020_m5	D	-37	-15	TAGGCATCAGTCAGTGATGACGT	9.7	7.5e-06	-11801	5125		RHE_RS18190																								RHE_RS15360	3	3144966	3146108	D	24298696	-	RHE_RS15360	WP_011426244.1	380	COG2133	G	PQQ-dependent sugar dehydrogenase	2956
RHE_RS10540	R	RHE_RS28020_m5	R	-40	-18	AGTTCATCAATGTCGTATGACAT	14.0	8.1e-08	-16329	7092		RHE_RS18225																								RHE_RS15305	3	3133196	3133483	R	24299701	-	RHE_RS15305	WP_011426234.1	95			DUF2188 domain-containing protein	2947
RHE_RS19035	D	RHE_RS28020_m5	D	-23	-1	GGCTCATCATGGGAGGATGACAT	10.9	2.5e-06	-12899	5602		RHE_RS18235																								RHE_RS15200	3	3111742	3113616	D	24298654	-	RHE_RS15200	WP_042118805.1	624	COG4191	T	sensor histidine kinase	2927
RHE_RS20610	R	RHE_RS28020_m5	R	-97	-75	CAGTCATTAAAGTGTGATGATTC	14.5	4.1e-08	-17010	7387		RHE_RS18270																								RHE_RS15195	3	3110185	3111516	R	24298655	-	RHE_RS15195	WP_011426214.1	443	COG1301	C	C4-dicarboxylate transporter	2926
RHE_RS20755	R	RHE_RS28020_m5	R	-181	-159	ATGTCAGACTGGCACCATGACCC	9.9	5.9e-06	-12041	5229		RHE_RS18295																								RHE_RS15015	3	3066687	3067427	D	24300832	-	RHE_RS15015	WP_011426178.1	246	COG2968	S	MULTISPECIES: SIMPL domain-containing protein	2890
RHE_RS28020	D	RHE_RS28020_m5	D	-92	-70	TTGTCATACATGTGTGATGAATC	16.4	1.9e-09	-20081	8721		RHE_RS18325																								RHE_RS14905	3	3049332	3050057	D	24301058	-	RHE_RS14905	WP_020921838.1	241	COG2771	K	LuxR family transcriptional regulator	2869
RHE_RS08430	D	RHE_RS28010_m1	D	-402	-383	ACGTAGACCCGGTTCGGGTC	4.8	8.2e-06	-11711	5086		RHE_RS18340																								RHE_RS14325	3	2914927	2915442	D	24297860	-	RHE_RS14325	WP_011426046.1	171	COG3814	S	hypothetical protein	2755
RHE_RS28005	R	RHE_RS28010_m1	R	-208	-189	CCTTAGAACCGGTTCGATGG	17.3	4.9e-09	-19134	8310		RHE_RS18350																								RHE_RS14115	3	2872027	2872935	R	24298049	-	RHE_RS14115	WP_011426004.1	302	COG4977	K	AraC family transcriptional regulator	2715
RHE_RS28005	R	RHE_RS28010_m1	R	-55	-36	ATATCGAACCGGTTCGGTGG	17.9	2.8e-09	-19694	8553		RHE_RS18380																								RHE_RS13750	3	2798801	2799247	R	24297755	-	RHE_RS13750	WP_041678693.1	148	COG3832	S	transcriptional regulator	2645
RHE_RS28010	D	RHE_RS28010_m1	D	-177	-158	ATATCGAACCGGTTCGGTGG	17.9	2.8e-09	-19694	8553		RHE_RS18475																								RHE_RS13745	3	2798319	2798627	R	24297756	-	RHE_RS13745	WP_011425935.1	102			MULTISPECIES: hypothetical protein	2644
RHE_RS28010	D	RHE_RS28010_m1	D	-24	-5	CCTTAGAACCGGTTCGATGG	17.3	4.9e-09	-19134	8310		RHE_RS18480																								RHE_RS13195	3	2689898	2690539	D	24301478	-	RHE_RS13195	WP_011425831.1	213	COG0262	H	dihydrofolate reductase	2545
RHE_RS28005	R	RHE_RS28010_m2	R	-209	-189	CCTTAGAACCGGTTCGATGGA	16.3	1.3e-08	-18158	7886		RHE_RS18505																								RHE_RS13190	3	2689288	2689809	R	24301479	-	RHE_RS13190	WP_011425830.1	173	COG1733	K	transcriptional regulator	2544
RHE_RS28005	R	RHE_RS28010_m2	R	-56	-36	ATATCGAACCGGTTCGGTGGC	16.5	1.1e-08	-18325	7959		RHE_RS18520																								RHE_RS12970	3	2645026	2647548	R	24299138	-	RHE_RS12970	WP_041678679.1	840	COG3264	M	mechanosensitive ion channel family protein	2502
RHE_RS28010	D	RHE_RS28010_m2	D	-177	-157	ATATCGAACCGGTTCGGTGGC	16.5	1.1e-08	-18325	7959		RHE_RS18525																								RHE_RS12890	3	2631915	2632394	D	24300404	-	RHE_RS12890	WP_011425774.1	159	COG4454	R	copper oxidase	2488
RHE_RS28010	D	RHE_RS28010_m2	D	-24	-4	CCTTAGAACCGGTTCGATGGA	16.3	1.3e-08	-18158	7886		RHE_RS18535																								RHE_RS12775	3	2612840	2613739	R	24299845	-	RHE_RS12775	WP_011425753.1	299	COG0583	K	LysR family transcriptional regulator	2466
RHE_RS00415	R	RHE_RS28010_m3	R	-169	-157	CCGCTTGACAGGC	12.2	1.0e-06	-13816	6000		RHE_RS18560																								RHE_RS12560	3	2567813	2570272	R	24300783	-	RHE_RS12560	WP_011425713.1	819	COG3250	G	glycoside hydrolase family 2 protein	2424
RHE_RS03980	D	RHE_RS28010_m3	D	-67	-55	CGACTTGACAGCC	9.5	9.3e-06	-11585	5032		RHE_RS18580																								RHE_RS12030	3	2461473	2463785	D	24298779	-	RHE_RS12030	WP_011425614.1	770	COG0280	C	NADP-dependent malic enzyme	2325
RHE_RS11740	R	RHE_RS28010_m3	R	-211	-199	CCGCTTGACAGAT	12.4	8.3e-07	-14002	6081		RHE_RS18590																								RHE_RS12025	3	2459594	2461033	R	24298492	-	RHE_RS12025	WP_011425613.1	479	COG0277	C	FAD-binding oxidoreductase	2324
RHE_RS25835	D	RHE_RS28010_m3	D	-41	-29	TTGCTTGACAGCT	9.4	9.3e-06	-11585	5032		RHE_RS18615																								RHE_RS11865	3	2419864	2422518	R	24297737	-	RHE_RS11865	WP_042118550.1	884	COG0013	J	alanine--tRNA ligase	2294
RHE_RS08130	D	RHE_RS28010_m4	D	-21	-4	TTTAGAAAGGGGTGGAAA	4.5	7.9e-06	-11749	5102		RHE_RS18650																								RHE_RS11840	3	2415403	2415945	R	24301127	-	RHE_RS11840	WP_011425577.1	180			hypothetical protein	2289
RHE_RS12925	R	RHE_RS28010_m4	R	-157	-140	TTAAGAGTCTGTTCGAGA	5.7	4.3e-06	-12357	5367		RHE_RS18655																								RHE_RS11805	3	2407241	2408113	R	24298392	-	RHE_RS11805	WP_011425570.1	290	COG0037	J	tRNA 2-thiocytidine(32) synthetase TtcA	2282
RHE_RS26730	R	RHE_RS28010_m4	R	-130	-113	TATAGTATCGGCCCGAAA	4.7	7.1e-06	-11855	5149		RHE_RS18665																								RHE_RS11540	3	2358166	2359422	D	24301352	-	RHE_RS11540	WP_011425518.1	418	COG0162	J	tyrosine--tRNA ligase	2231
RHE_RS28005	R	RHE_RS28010_m4	R	-207	-190	CTTAGAACCGGTTCGATG	16.2	6.6e-09	-18836	8180		RHE_RS18675																								RHE_RS11535	3	2356922	2358034	R	24297706	-	RHE_RS11535	WP_011425517.1	370	COG2377	M	anhydro-N-acetylmuramic acid kinase	2230
RHE_RS28005	R	RHE_RS28010_m4	R	-54	-37	TATCGAACCGGTTCGGTG	5.2	5.6e-06	-12093	5252		RHE_RS18680																								RHE_RS11475	3	2345651	2346691	D	24298405	-	RHE_RS11475	WP_011425505.1	346	COG3757	M	cell-wall lytic enzyme	2217
RHE_RS28010	D	RHE_RS28010_m4	D	-176	-159	TATCGAACCGGTTCGGTG	5.2	5.6e-06	-12093	5252		RHE_RS18685																								RHE_RS11415	3	2333691	2335223	R	24299263	-	RHE_RS11415	WP_011425493.1	510	COG4799	I	acyl-CoA carboxylase subunit beta	2205
RHE_RS28010	D	RHE_RS28010_m4	D	-23	-6	CTTAGAACCGGTTCGATG	16.2	6.6e-09	-18836	8180		RHE_RS18695																								RHE_RS11195	3	2296514	2297716	D	24299019	-	RHE_RS11195	WP_041678651.1	400	COG0628	R	AI-2E family transporter	2162
RHE_RS05790	D	RHE_RS28010_m5	D	-227	-214	TGTCAATCCGAAAT	10.5	4.3e-06	-12357	5367		RHE_RS18705																								RHE_RS11190	3	2293970	2296057	D	24300326	parE	RHE_RS11190	WP_042118501.1	695	COG0187	L	DNA topoisomerase IV subunit B	2161
RHE_RS28005	R	RHE_RS28010_m5	R	-95	-82	TGTCAAGTCGAAAT	13.9	1.7e-08	-17890	7770		RHE_RS18710																								RHE_RS11185	3	2292852	2293751	R	24300514	-	RHE_RS11185	WP_011425449.1	299	COG0400	R	phospholipase	2160
RHE_RS28005	R	RHE_RS28010_m5	R	-45	-32	TATCATATCGAACC	11.2	2.1e-06	-13074	5678		RHE_RS18745																								RHE_RS11005	3	2255987	2258137	R	24297832	-	RHE_RS11005	WP_011425416.1	716	COG0668	M	mechanosensitive ion channel family protein	2126
RHE_RS28010	D	RHE_RS28010_m5	D	-181	-168	TATCATATCGAACC	11.2	2.1e-06	-13074	5678		RHE_RS18760																								RHE_RS10975	3	2246914	2248296	D	24298155	-	RHE_RS10975	WP_011425411.1	460	COG0161	H	aspartate aminotransferase family protein	2121
RHE_RS28010	D	RHE_RS28010_m5	D	-131	-118	TGTCAAGTCGAAAT	13.9	1.7e-08	-17890	7770		RHE_RS18795																								RHE_RS10760	3	2200232	2200561	R	24299686	-	RHE_RS10760	WP_008526562.1	109	COG3785	O	MULTISPECIES: heat shock protein HspQ	2077
RHE_RS00065	D	RHE_RS27935_m1	D	-33	-10	GCTTTACGACAACAGGGAAAATCT	2.7	9.1e-06	-11607	5041		RHE_RS18835																								RHE_RS10710	3	2186771	2188597	D	24298428	glmS	RHE_RS10710	WP_011425359.1	608	COG0449	M	glutamine--fructose-6-phosphate transaminase (isomerizing)	2068
RHE_RS05790	D	RHE_RS27935_m1	D	-242	-219	GAGTTACACGCAGCCTGTCAATCC	2.8	8.7e-06	-11652	5060		RHE_RS18845																								RHE_RS10445	3	2131364	2132251	R	24299905	-	RHE_RS10445	WP_011425307.1	295	COG2207	K	AraC family transcriptional regulator	2014
RHE_RS18650	D	RHE_RS27935_m1	D	-90	-67	AATTTACACAGATCCTCTGAAGCT	3.5	6.2e-06	-11991	5208		RHE_RS18860																								RHE_RS09845	3	2011986	2012705	R	24297967	-	RHE_RS09845	WP_042119239.1	239	COG1974	KT	LexA repressor	1895
RHE_RS27930	R	RHE_RS27935_m1	R	-157	-134	GCTTCACACCTACAGTGTAAATCA	26.6	1.2e-13	-29751	12921		RHE_RS18865																								RHE_RS09770	3	1994847	1995614	D	24301333	rpsB	RHE_RS09770	WP_003573382.1	255	COG0052	J	MULTISPECIES: 30S ribosomal protein S2	1880
RHE_RS27935	D	RHE_RS27935_m1	D	-39	-16	GCTTCACACCTACAGTGTAAATCA	26.6	1.2e-13	-29751	12921		RHE_RS18895																								RHE_RS09650	3	1970367	1970672	D	24300512	-	RHE_RS09650	WP_011425171.1	101			NADH-ubiquinone oxidoreductase	1856
RHE_RS10345	D	RHE_RS27935_m2	D	-350	-335	TTATCGCGTAAGTCAA	5.8	5.3e-06	-12148	5276		RHE_RS18900																								RHE_RS09570	3	1955671	1956828	D	24300302	-	RHE_RS09570	WP_011425160.1	385	COG0436	E	1-aminocyclopropane-1-carboxylate deaminase	1844
RHE_RS20540	R	RHE_RS27935_m2	R	-63	-48	TTAGACTGTAAACGCA	5.6	6.1e-06	-12007	5215		RHE_RS18930																								RHE_RS09565	3	1954708	1955466	R	24300303	-	RHE_RS09565	WP_042118333.1	252	COG1651	O	DsbA family protein	1843
RHE_RS26695	R	RHE_RS27935_m2	R	-94	-79	TTACAGCGAAAAACAA	5.5	6.1e-06	-12007	5215		RHE_RS18935																								RHE_RS09515	3	1947116	1948618	D	24298180	gatB	RHE_RS09515	WP_011425149.1	500	COG0064	J	Asp-tRNA(Asn)/Glu-tRNA(Gln) amidotransferase GatCAB subunit B	1833
RHE_RS27930	R	RHE_RS27935_m2	R	-158	-143	CTACAGTGTAAATCAA	21.6	7.3e-11	-23341	10137		RHE_RS18940																								RHE_RS09080	3	1862137	1862796	D	24298071	-	RHE_RS09080	WP_011425068.1	219	COG3806	T	transcriptional regulator	1749
RHE_RS27935	D	RHE_RS27935_m2	D	-30	-15	CTACAGTGTAAATCAA	21.6	7.3e-11	-23341	10137		RHE_RS18970																								RHE_RS08920	3	1826503	1826964	D	24299005	-	RHE_RS08920	WP_011425036.1	153	COG1522	K	Lrp/AsnC family transcriptional regulator	1718
RHE_RS01700	R	RHE_RS27935_m3	R	-159	-139	ATTCACAGTTGGAGGGTATTA	6.0	4.0e-06	-12429	5398		RHE_RS18990																								RHE_RS08915	3	1825589	1826380	R	24299006	-	RHE_RS08915	WP_011425035.1	263	COG3186	E	MULTISPECIES: phenylalanine 4-monooxygenase	1717
RHE_RS03515	R	RHE_RS27935_m3	R	-220	-200	CATTCCACCGAAAGTGAAATG	5.0	7.0e-06	-11870	5155		RHE_RS19015																								RHE_RS08685	3	1780372	1780740	D	24301486	-	RHE_RS08685	WP_011424992.1	122	COG0099	J	MULTISPECIES: 30S ribosomal protein S13	1673
RHE_RS03520	D	RHE_RS27935_m3	D	-102	-82	CATTCCACCGAAAGTGAAATG	5.0	7.0e-06	-11870	5155		RHE_RS19020																								RHE_RS08660	3	1776643	1777212	D	24301452	-	RHE_RS08660	WP_003573784.1	189	COG0098	J	MULTISPECIES: 30S ribosomal protein S5	1668
RHE_RS24725	D	RHE_RS27935_m3	D	-81	-61	CATCACGACTATGTTGTAAAT	4.3	9.4e-06	-11575	5027		RHE_RS19030																								RHE_RS08630	3	1773950	1774258	D	24300707	-	RHE_RS08630	WP_004674929.1	102	COG0198	J	MULTISPECIES: 50S ribosomal protein L24	1662
RHE_RS27930	R	RHE_RS27935_m3	R	-155	-135	CTTCACACCTACAGTGTAAAT	22.2	2.1e-11	-24586	10678		RHE_RS19035																								RHE_RS08560	3	1764565	1766664	D	24300995	fusA	RHE_RS08560	WP_011424979.1	699	COG0480	J	elongation factor G	1648
RHE_RS27935	D	RHE_RS27935_m3	D	-38	-18	CTTCACACCTACAGTGTAAAT	22.2	2.1e-11	-24586	10678		RHE_RS19050																								RHE_RS08525	3	1752970	1753488	D	24300024	-	RHE_RS08525	WP_008521410.1	172	COG0244	J	MULTISPECIES: 50S ribosomal protein L10	1641
RHE_RS06685	R	RHE_RS27935_m4	R	-104	-75	GCGGGTTTAACAATTGACGTTAACGTAAGC	1.9	4.8e-06	-12247	5319		RHE_RS19180																								RHE_RS08455	3	1743149	1743922	R	24301146	-	RHE_RS08455	WP_011424966.1	257	COG0061	F	MULTISPECIES: NAD kinase	1631
RHE_RS13695	D	RHE_RS27935_m4	D	-92	-63	AGTGGCGCGGCCGACGTTGATGGTGCGAGC	0.8	7.9e-06	-11749	5102		RHE_RS19190																								RHE_RS08350	3	1716074	1716445	D	24298451	-	RHE_RS08350	WP_003547430.1	123	COG0784	T	MULTISPECIES: response regulator	1610
RHE_RS23365	R	RHE_RS27935_m4	R	-102	-73	ACTGGTCTCGTGCAGAACTATCTGGTAAAC	4.1	1.6e-06	-13346	5796		RHE_RS19205																								RHE_RS08320	3	1707959	1711456	D	24300023	-	RHE_RS08320	WP_011424944.1	1165	COG0587	L	DNA polymerase III subunit alpha	1604
RHE_RS23370	D	RHE_RS27935_m4	D	-269	-240	ACTGGTCTCGTGCAGAACTATCTGGTAAAC	4.1	1.6e-06	-13346	5796		RHE_RS19235																								RHE_RS08035	3	1654503	1655330	D	24297820	-	RHE_RS08035	WP_011424900.1	275	COG1024	I	enoyl-CoA hydratase	1553
RHE_RS27930	R	RHE_RS27935_m4	R	-72	-43	ACTGGTCTGGCCAATCTTGATGGGTTAAGC	33.1	9.9e-17	-36851	16004		RHE_RS19250																								RHE_RS08025	3	1653220	1654098	R	24300585	-	RHE_RS08025	WP_042119226.1	292	COG0583	K	LysR family transcriptional regulator	1551
RHE_RS27935	D	RHE_RS27935_m4	D	-130	-101	ACTGGTCTGGCCAATCTTGATGGGTTAAGC	33.1	9.9e-17	-36851	16004		RHE_RS19270																								RHE_RS07755	3	1598817	1601189	R	24298216	-	RHE_RS07755	WP_011424851.1	790	COG0535	R	radical SAM protein	1501
RHE_RS29945	D	RHE_RS27935_m4	D	-199	-170	TCTGATCCGGCAAATCTGCAGGTATTAACC	0.5	9.1e-06	-11607	5041		RHE_RS19275																								RHE_RS07105	3	1465826	1466578	D	24300133	-	RHE_RS07105	WP_011424727.1	250	COG0664	T	Crp/Fnr family transcriptional regulator	1370
RHE_RS26290	D	RHE_RS27935_m5	D	-53	-34	ACACGGATATGGCGAATAAC	8.5	6.9e-06	-11884	5161		RHE_RS19300																								RHE_RS07005	3	1436202	1436438	R	24300264	-	RHE_RS07005	WP_011424707.1	78			hypothetical protein	1349
RHE_RS26610	R	RHE_RS27935_m5	R	-57	-38	AAACTGGTATGATGAGTCAA	9.5	3.7e-06	-12507	5432		RHE_RS19305																								RHE_RS06725	3	1372368	1373717	R	24298749	-	RHE_RS06725	WP_041678595.1	449	COG0174	E	glutamine synthetase	1293
RHE_RS26635	D	RHE_RS27935_m5	D	-41	-22	AAACTGTTAGGAGGAAGCAT	8.5	6.9e-06	-11884	5161		RHE_RS19330																								RHE_RS06590	3	1334873	1335298	D	24301572	-	RHE_RS06590	WP_011424627.1	141	COG4520	M	hypothetical protein	1266
RHE_RS27930	R	RHE_RS27935_m5	R	-158	-139	ACACCTACAGTGTAAATCAA	11.5	9.3e-07	-13888	6032		RHE_RS19375																								RHE_RS06465	3	1315120	1315680	R	24299049	-	RHE_RS06465	WP_011424602.1	186	COG1309	K	TetR family transcriptional regulator	1242
RHE_RS27930	R	RHE_RS27935_m5	R	-60	-41	CGACTGGTCTGGCCAATCTT	13.5	1.9e-07	-15476	6721		RHE_RS19425																								RHE_RS06410	3	1302661	1303083	R	24301154	-	RHE_RS06410	WP_041678593.1	140	COG2166	O	cysteine desulfuration protein SufE	1231
RHE_RS27935	D	RHE_RS27935_m5	D	-132	-113	CGACTGGTCTGGCCAATCTT	13.5	1.9e-07	-15476	6721		RHE_RS19440																								RHE_RS06325	3	1289451	1290119	D	24298121	-	RHE_RS06325	WP_011424573.1	222	COG1272	U	DNA-binding protein	1214
RHE_RS27935	D	RHE_RS27935_m5	D	-34	-15	ACACCTACAGTGTAAATCAA	11.5	9.3e-07	-13888	6032		RHE_RS19450																								RHE_RS06175	3	1257609	1258301	R	24298525	-	RHE_RS06175	WP_011424544.1	230	COG2378	K	YafY family transcriptional regulator	1184
RHE_RS13025	R	RHE_RS27930_m1	R	-52	-33	CCGCTTTCATTGTGAACCAC	8.6	9.6e-06	-11554	5018		RHE_RS19540																								RHE_RS06105	3	1244328	1245227	R	24299707	-	RHE_RS06105	WP_011424530.1	299	COG0583	K	LysR family transcriptional regulator	1170
RHE_RS15430	R	RHE_RS27930_m1	R	-242	-223	AGACCTGCTGTGGAAAGCAC	9.6	4.8e-06	-12247	5319		RHE_RS19545																								RHE_RS05220	3	1083154	1084002	D	24299480	-	RHE_RS05220	WP_011424373.1	282	COG0702	R	SDR family NAD(P)-dependent oxidoreductase	1004
RHE_RS26610	R	RHE_RS27930_m1	R	-57	-38	AAACTGGTATGATGAGTCAA	9.1	6.8e-06	-11899	5167		RHE_RS19590																								RHE_RS05215	3	1082632	1083027	R	24299481	-	RHE_RS05215	WP_011424372.1	131	COG1733	K	transcriptional regulator	1003
RHE_RS26635	D	RHE_RS27930_m1	D	-41	-22	AAACTGTTAGGAGGAAGCAT	11.0	1.7e-06	-13285	5770		RHE_RS19595																								RHE_RS05185	3	1070934	1074329	D	24299816	-	RHE_RS05185	WP_042118039.1	1131	COG0204	I	acyl	997
RHE_RS27930	R	RHE_RS27930_m1	R	-158	-139	ACACCTACAGTGTAAATCAA	18.4	2.3e-10	-22193	9638		RHE_RS19670																								RHE_RS05065	3	1047892	1051353	D	24297808	-	RHE_RS05065	WP_011424347.1	1153	COG1196	D	chromosome segregation protein SMC	974
RHE_RS27930	R	RHE_RS27930_m1	R	-60	-41	CGACTGGTCTGGCCAATCTT	11.1	1.5e-06	-13410	5824		RHE_RS19695																								RHE_RS05000	3	1038395	1039291	D	24297850	-	RHE_RS05000	WP_011424335.1	298	COG0583	K	LysR family transcriptional regulator	959
RHE_RS27935	D	RHE_RS27930_m1	D	-132	-113	CGACTGGTCTGGCCAATCTT	11.1	1.5e-06	-13410	5824		RHE_RS19700																								RHE_RS04885	3	1014467	1015270	D	24301306	-	RHE_RS04885	WP_011424314.1	267	COG4233	OC	protein involved in C cytochrome biogenesis	937
RHE_RS27935	D	RHE_RS27930_m1	D	-34	-15	ACACCTACAGTGTAAATCAA	18.4	2.3e-10	-22193	9638		RHE_RS19710																								RHE_RS04590	3	960013	961956	D	24299803	-	RHE_RS04590	WP_011424259.1	647	COG0840	NT	methyl-accepting chemotaxis protein	880
RHE_RS18650	D	RHE_RS27930_m2	D	-123	-103	CTTTACATCGCGCATGTAAAG	2.6	3.4e-06	-12592	5469		RHE_RS19725																								RHE_RS04465	3	928158	928619	D	24299625	-	RHE_RS04465	WP_011424235.1	153			hypothetical protein	855
RHE_RS18650	D	RHE_RS27930_m2	D	-89	-69	ATTTACACAGATCCTCTGAAG	2.7	3.3e-06	-12622	5481		RHE_RS19745																								RHE_RS04315	3	898509	899243	D	24297576	-	RHE_RS04315	WP_042117980.1	244	COG2197	TK	LuxR family transcriptional regulator	826
RHE_RS27930	R	RHE_RS27930_m2	R	-155	-135	CTTCACACCTACAGTGTAAAT	24.6	2.7e-12	-26638	11569		RHE_RS19750																								RHE_RS04190	3	871218	874124	D	24300790	-	RHE_RS04190	WP_011424181.1	968	COG0060	J	isoleucine--tRNA ligase	801
RHE_RS27935	D	RHE_RS27930_m2	D	-38	-18	CTTCACACCTACAGTGTAAAT	24.6	2.7e-12	-26638	11569		RHE_RS19765																								RHE_RS04070	3	846404	847843	D	24300487	-	RHE_RS04070	WP_011424158.1	479	COG0277	C	FAD-binding oxidoreductase	777
RHE_RS13695	D	RHE_RS27930_m3	D	-92	-63	AGTGGCGCGGCCGACGTTGATGGTGCGAGC	2.9	4.7e-07	-14571	6328		RHE_RS19835																								RHE_RS04065	3	845367	846263	R	24300488	-	RHE_RS04065	WP_011424157.1	298	COG0583	K	LysR family transcriptional regulator	776
RHE_RS23365	R	RHE_RS27930_m3	R	-102	-73	ACTGGTCTCGTGCAGAACTATCTGGTAAAC	-2.4	4.5e-06	-12311	5347		RHE_RS19840																								RHE_RS03790	3	785919	786890	D	24298218	-	RHE_RS03790	WP_011424108.1	323	COG0463	M	hemolysin activation protein	724
RHE_RS23370	D	RHE_RS27930_m3	D	-269	-240	ACTGGTCTCGTGCAGAACTATCTGGTAAAC	-2.4	4.5e-06	-12311	5347		RHE_RS19890																								RHE_RS03680	3	766258	766692	D	24300478	-	RHE_RS03680	WP_011424089.1	144			DUF4174 domain-containing protein	703
RHE_RS27930	R	RHE_RS27930_m3	R	-72	-43	ACTGGTCTGGCCAATCTTGATGGGTTAAGC	33.5	2.0e-16	-36148	15699		RHE_RS19905																								RHE_RS03315	3	676190	676924	D	24298830	flgF	RHE_RS03315	WP_011424020.1	244	COG4786	N	flagellar basal-body rod protein FlgF	633
RHE_RS27935	D	RHE_RS27930_m3	D	-130	-101	ACTGGTCTGGCCAATCTTGATGGGTTAAGC	33.5	2.0e-16	-36148	15699		RHE_RS19935																								RHE_RS03030	3	617024	618280	R	24300160	-	RHE_RS03030	WP_042117866.1	418	COG1055	P	arsenic transporter	576
RHE_RS29620	D	RHE_RS27930_m3	D	-131	-102	GCCGCCCCGATCAATTTTGCTCATGTAACC	-3.4	6.7e-06	-11913	5174		RHE_RS19965																								RHE_RS03025	3	616551	616916	R	24298214	-	RHE_RS03025	WP_080655774.1	121			MULTISPECIES: DUF1476 domain-containing protein	575
RHE_RS29945	D	RHE_RS27930_m3	D	-199	-170	TCTGATCCGGCAAATCTGCAGGTATTAACC	-3.6	7.3e-06	-11828	5137		RHE_RS19970																								RHE_RS02850	3	584323	585525	R	24301554	-	RHE_RS02850	WP_011423933.1	400	COG2814	G	MFS transporter	543
RHE_RS19935	R	RHE_RS27930_m4	R	-305	-289	CCCCAACGAAACTGGTC	9.6	3.5e-06	-12563	5456		RHE_RS20015																								RHE_RS02835	3	582782	583225	R	24301251	-	RHE_RS02835	WP_011423930.1	147	COG1846	K	MarR family transcriptional regulator	540
RHE_RS27930	R	RHE_RS27930_m4	R	-49	-33	CATCATCGCGACTGGTC	15.7	2.2e-08	-17632	7658		RHE_RS20020																								RHE_RS02620	3	536936	537928	D	24297766	-	RHE_RS02620	WP_011423891.1	330	COG1281	O	MULTISPECIES: Hsp33 family molecular chaperone	500
RHE_RS27935	D	RHE_RS27930_m4	D	-140	-124	CATCATCGCGACTGGTC	15.7	2.2e-08	-17632	7658		RHE_RS20060																								RHE_RS02615	3	535931	536845	D	24300992	argF	RHE_RS02615	WP_011423890.1	304	COG0078	E	ornithine carbamoyltransferase	499
RHE_RS00870	R	RHE_RS27930_m5	R	-95	-79	GACTGGTTTGGCTAGAC	9.1	6.0e-06	-12024	5222		RHE_RS20070																								RHE_RS02560	3	522833	524050	D	24300890	-	RHE_RS02560	WP_020920305.1	405			hypothetical protein	488
RHE_RS26000	R	RHE_RS27930_m5	R	-44	-28	CACTGGGCAAGCCAGTT	9.5	4.6e-06	-12289	5337		RHE_RS20095																								RHE_RS02320	3	469720	470154	D	24299252	-	RHE_RS02320	WP_011423835.1	144	COG4101	R	cupin domain-containing protein	441
RHE_RS26765	D	RHE_RS27930_m5	D	-62	-46	AATTGGTCAGGCCAGTT	14.4	7.7e-08	-16379	7114		RHE_RS20110																								RHE_RS02315	3	468071	469603	R	24299253	-	RHE_RS02315	WP_011423834.1	510	COG0457	R	transcriptional regulator	440
RHE_RS27930	R	RHE_RS27930_m5	R	-58	-42	GACTGGTCTGGCCAATC	17.3	2.0e-09	-20030	8699		RHE_RS20140																								RHE_RS01855	3	379578	380003	D	24299184	-	RHE_RS01855	WP_010032703.1	141	COG0071	O	MULTISPECIES: heat-shock protein Hsp20	352
RHE_RS27935	D	RHE_RS27930_m5	D	-131	-115	GACTGGTCTGGCCAATC	17.3	2.0e-09	-20030	8699		RHE_RS20150																								RHE_RS01475	3	298903	299799	D	24301030	-	RHE_RS01475	WP_011423675.1	298	COG0583	K	LysR family transcriptional regulator	279
RHE_RS28420	R	RHE_RS27930_m5	R	-283	-267	ATTTGGTATGACCAGAT	9.9	3.2e-06	-12652	5495		RHE_RS20175																								RHE_RS01360	3	280222	280839	D	24298068	-	RHE_RS01360	WP_011423654.1	205			hypothetical protein	258
RHE_RS28425	D	RHE_RS27930_m5	D	-75	-59	ATTTGGTATGACCAGAT	9.9	3.2e-06	-12652	5495		RHE_RS20280																								RHE_RS01350	3	278641	279549	D	24301226	-	RHE_RS01350	WP_011423652.1	302	COG0583	K	LysR family transcriptional regulator	256
RHE_RS06640	R	RHE_RS27925_m1	R	-143	-117	CGCGAACGCGAAGTTTGCCGGCAAAAA	-7.7	7.2e-06	-11841	5143		RHE_RS20285																								RHE_RS00995	3	209761	210390	R	24299567	-	RHE_RS00995	WP_020920114.1	209	COG0035	F	MULTISPECIES: uracil phosphoribosyltransferase	187
RHE_RS13800	R	RHE_RS27925_m1	R	-126	-100	GCCTACCTACTAGTTAGTAGACAAACA	-6.6	4.8e-06	-12247	5319		RHE_RS20295																								RHE_RS00885	3	188124	189197	R	24299022	-	RHE_RS00885	WP_011423568.1	357	COG3770	M	penicillin-insensitive murein endopeptidase	167
RHE_RS13805	D	RHE_RS27925_m1	D	-41	-15	GCCTACCTACTAGTTAGTAGACAAACA	-6.6	4.8e-06	-12247	5319		RHE_RS20315																								RHE_RS00525	3	112252	112974	D	24299524	-	RHE_RS00525	WP_011423498.1	240	COG3619	S	DUF1275 domain-containing protein	95
RHE_RS18010	R	RHE_RS27925_m2	R	-192	-172	TGAAAACATGGCCTTAAATAA	2.6	6.5e-06	-11944	5187		RHE_RS20320																								RHE_RS00070	3	10772	11371	R	24300012	-	RHE_RS00070	WP_011423419.1	199	COG0778	C	oxidoreductase	13
RHE_RS18015	D	RHE_RS27925_m2	D	-170	-150	TGAAAACATGGCCTTAAATAA	2.6	6.5e-06	-11944	5187		RHE_RS20380																								RHE_RS00065	3	8271	10706	D	24300013	gyrB	RHE_RS00065	WP_011423418.1	811	COG0187	L	DNA topoisomerase (ATP-hydrolyzing) subunit B	12
RHE_RS22030	R	RHE_RS27925_m2	R	-71	-51	GGAAAACATCAAGTTTCCTAA	5.9	1.3e-06	-13553	5886		RHE_RS20395																								RHE_RS33140	2	313546	313737	D	31930227	-	RHE_RS33140	WP_004674400.1	63			MULTISPECIES: nitrogen fixation transcriptional regulator protein	5940
RHE_RS27925	D	RHE_RS27925_m2	D	-60	-40	TGAAAACATCGAGTTAGCTTA	26.1	4.3e-13	-28475	12367		RHE_RS20400																								RHE_RS30790	2	293084	294022	D	24297207	-	RHE_RS30790	WP_029532439.1	312	COG0583	K	MULTISPECIES: LysR family transcriptional regulator	5919
RHE_RS30785	D	RHE_RS27925_m2	D	-269	-249	TGAAAACAGTGGGTTTGGCGA	1.8	9.3e-06	-11585	5032		RHE_RS20405																								RHE_RS30350	2	207125	208546	R	24297426	-	RHE_RS30350	WP_011053408.1	473	COG2801	X	ISNCY-like element ISRel10 family transposase	5845
RHE_RS26115	R	RHE_RS27925_m3	R	-60	-50	CAAGCTAACCC	10.3	5.8e-06	-12058	5237		RHE_RS20450																								RHE_RS29195	2	594574	595299	D	24302804	-	RHE_RS29195	WP_011428833.1	241	COG0745	TK	DNA-binding response regulator	5619
RHE_RS27070	D	RHE_RS27925_m3	D	-246	-236	AGAGCTAACTC	13.5	1.2e-07	-15936	6921		RHE_RS20455																								RHE_RS28975	2	554583	555260	R	24302848	-	RHE_RS28975	WP_011428795.1	225	COG0517	T	CBS domain-containing protein	5578
RHE_RS27925	D	RHE_RS27925_m4	D	-40	-27	ATGCTTCGAAGGTA	10.3	5.2e-06	-12167	5284		RHE_RS20460																								RHE_RS28695	2	487756	488760	R	24302904	-	RHE_RS28695	WP_011428740.1	334	COG2207	K	AraC family transcriptional regulator	5523
RHE_RS14770	D	RHE_RS27925_m5	D	-137	-114	GAATTCTTCAGGTTCCGGCGAGTG	8.3	9.0e-06	-11618	5046		RHE_RS20470																								RHE_RS28650	2	479467	479985	D	24302913	-	RHE_RS28650	WP_063503105.1	172			hypothetical protein	5515
RHE_RS16185	R	RHE_RS27925_m5	R	-31	-8	CGATCCTTCTCGTTCCGGCGAAGA	8.2	9.6e-06	-11554	5018		RHE_RS20485																								RHE_RS28545	2	458466	459071	R	24302934	-	RHE_RS28545	WP_011428711.1	201	COG1917	R	transcriptional regulator	5495
RHE_RS16935	R	RHE_RS27925_m5	R	-83	-60	CAATTCCCATGCCGCCTGCGAAAA	8.9	6.1e-06	-12007	5215		RHE_RS20490																								RHE_RS28305	2	405850	406326	R	24302982	-	RHE_RS28305	WP_004679019.1	158	COG1522	K	MULTISPECIES: Lrp/AsnC family transcriptional regulator	5447
RHE_RS22060	D	RHE_RS27925_m5	D	-219	-196	CTATTTTGCCGGCCAAGTCGAAAC	8.5	7.9e-06	-11749	5102		RHE_RS20500																								RHE_RS28140	2	369218	369532	D	24303015	-	RHE_RS28140	WP_011428636.1	104	COG0234	O	co-chaperone GroES	5415
RHE_RS05815	R	RHE_RS27920_m1	R	-80	-65	TTTGATTGACTGATCA	11.5	1.3e-06	-13553	5886		RHE_RS20530																								RHE_RS27750	2	274051	275121	D	24303093	-	RHE_RS27750	WP_011428563.1	356	COG1609	K	LacI family transcriptional regulator	5337
RHE_RS05815	R	RHE_RS27920_m1	R	-76	-61	TATTTTTGATTGACTG	9.3	5.8e-06	-12058	5237		RHE_RS20540																								RHE_RS27745	2	273042	273869	R	24303094	-	RHE_RS27745	WP_011428562.1	275	COG0834	ET	amino acid ABC transporter substrate-binding protein	5336
RHE_RS05820	D	RHE_RS27920_m1	D	-115	-100	TATTTTTGATTGACTG	9.3	5.8e-06	-12058	5237		RHE_RS20550																								RHE_RS26890	2	91040	92107	D	24303265	-	RHE_RS26890	WP_011428400.1	355	COG3842	E	ABC transporter ATP-binding protein	5167
RHE_RS05820	D	RHE_RS27920_m1	D	-111	-96	TTTGATTGACTGATCA	11.5	1.3e-06	-13553	5886		RHE_RS20560																								RHE_RS26285	2	477992	478828	D	24302306	-	RHE_RS26285	WP_020923242.1	278	COG3618	R	amidohydrolase	5048
RHE_RS20060	R	RHE_RS27920_m1	R	-281	-266	GATTATTGACTGATCC	10.7	2.3e-06	-12983	5638		RHE_RS20575																								RHE_RS26105	2	436135	439440	D	24302342	-	RHE_RS26105	WP_011428249.1	1101	COG3459	G	hypothetical protein	5010
RHE_RS27915	R	RHE_RS27920_m1	R	-50	-35	TATAATTGACTGACGG	16.7	1.4e-09	-20387	8854		RHE_RS20580																								RHE_RS26095	2	434735	435145	R	24302344	-	RHE_RS26095	WP_011428247.1	136			hypothetical protein	5008
RHE_RS27920	D	RHE_RS27920_m1	D	-82	-67	TATAATTGACTGACGG	16.7	1.4e-09	-20387	8854		RHE_RS20585																								RHE_RS26045	2	423828	424604	D	24302354	-	RHE_RS26045	WP_011428239.1	258			SDR family NAD(P)-dependent oxidoreductase	4999
RHE_RS05510	R	RHE_RS27920_m2	R	-41	-16	GCGCGGACTAATTGATTAGTCAAGGC	5.5	4.0e-06	-12429	5398		RHE_RS20595																								RHE_RS25855	2	386646	388073	D	24302392	aspA	RHE_RS25855	WP_011428205.1	475	COG1027	E	aspartate ammonia-lyase	4962
RHE_RS05515	D	RHE_RS27920_m2	D	-183	-158	GCGCGGACTAATTGATTAGTCAAGGC	5.5	4.0e-06	-12429	5398		RHE_RS20610																								RHE_RS25835	2	382223	382942	D	24302396	-	RHE_RS25835	WP_042119925.1	239	COG2186	K	FadR family transcriptional regulator	4958
RHE_RS05815	R	RHE_RS27920_m2	R	-92	-67	TGATTGACTGATCAATCAACAAAAAT	9.3	4.8e-07	-14549	6319		RHE_RS20625																								RHE_RS25560	2	330344	331213	D	24302451	-	RHE_RS25560	WP_011428148.1	289	COG1595	K	DNA-directed RNA polymerase sigma-70 factor	4903
RHE_RS05815	R	RHE_RS27920_m2	R	-88	-63	TTTTTGATTGACTGATCAATCAACAA	12.3	7.6e-08	-16393	7119		RHE_RS20655																								RHE_RS24370	2	80248	80877	R	24302689	-	RHE_RS24370	WP_011427926.1	209	COG0484	O	MULTISPECIES: J domain-containing protein	4673
RHE_RS05820	D	RHE_RS27920_m2	D	-113	-88	TTTTTGATTGACTGATCAATCAACAA	12.3	7.6e-08	-16393	7119		RHE_RS20690																								RHE_RS23500	2	137691	139280	D	24302149	-	RHE_RS23500	WP_042119747.1	529	COG0747	E	peptide ABC transporter substrate-binding protein	4500
RHE_RS05820	D	RHE_RS27920_m2	D	-109	-84	TGATTGACTGATCAATCAACAAAAAT	9.3	4.8e-07	-14549	6319		RHE_RS20695																								RHE_RS23415	2	119094	119549	D	24302166	-	RHE_RS23415	WP_011427738.1	151	COG3467	V	pyridoxamine 5\'-phosphate oxidase family protein	4484
RHE_RS05855	R	RHE_RS27920_m2	R	-67	-42	GCACGAAATGACTCGACATTCAATAA	3.9	8.9e-06	-11629	5051		RHE_RS20710																								RHE_RS23190	2	67937	69124	D	24302211	-	RHE_RS23190	WP_011427695.1	395	COG0183	I	acetyl-CoA C-acyltransferase	4439
RHE_RS06015	R	RHE_RS27920_m2	R	-91	-66	CAATTTAATTGTGCGTTAGTAAAACA	3.7	9.8e-06	-11533	5009		RHE_RS20715																								RHE_RS22605	2	130935	132008	D	24301921	-	RHE_RS22605	WP_011427582.1	357	COG1609	K	LacI family transcriptional regulator	4326
RHE_RS10345	D	RHE_RS27920_m2	D	-357	-332	GGCATGATTATCGCGTAAGTCAATGA	8.2	9.2e-07	-13899	6036		RHE_RS20725																								RHE_RS22210	2	45987	47885	D	24302000	-	RHE_RS22210	WP_042119651.1	632	COG0531	E	APC family permease	4252
RHE_RS15570	D	RHE_RS27920_m2	D	-121	-96	ATATTTATTAGCCGGGCAATCAAAAA	4.7	6.0e-06	-12024	5222		RHE_RS20735																								RHE_RS22090	2	18664	19437	D	24302024	-	RHE_RS22090	WP_011427484.1	257	COG1349	KG	DeoR/GlpR transcriptional regulator	4228
RHE_RS17450	D	RHE_RS27920_m2	D	-41	-16	TATAGGACTGATTAAACGATTAATCA	5.6	3.7e-06	-12507	5432		RHE_RS20755																								RHE_RS22060	2	14394	14921	D	24302030	-	RHE_RS22060	WP_042119641.1	175			hypothetical protein	4223
RHE_RS17450	D	RHE_RS27920_m2	D	-37	-12	GGACTGATTAAACGATTAATCAGAAT	4.6	6.3e-06	-11975	5201		RHE_RS20765																								RHE_RS21915	2	179066	179806	R	24301709	-	RHE_RS21915	WP_032490539.1	246	COG2771	K	LuxR family transcriptional regulator	4195
RHE_RS27915	R	RHE_RS27920_m2	R	-66	-41	TGACTGACGGATTAGTCAATGAAACT	6.9	1.9e-06	-13174	5721		RHE_RS20770																								RHE_RS21050	2	4371366	4371839	D	24300726	-	RHE_RS21050	WP_011427297.1	157	COG5468	S	hypothetical protein	4058
RHE_RS27915	R	RHE_RS27920_m2	R	-62	-37	TAATTGACTGACGGATTAGTCAATGA	26.0	1.9e-13	-29292	12721		RHE_RS20775																								RHE_RS21040	2	4367848	4368507	R	24299544	-	RHE_RS21040	WP_011427295.1	219	COG0325	R	YggS family pyridoxal phosphate-dependent enzyme	4056
RHE_RS27920	D	RHE_RS27920_m2	D	-80	-55	TAATTGACTGACGGATTAGTCAATGA	26.0	1.9e-13	-29292	12721		RHE_RS20790																								RHE_RS20655	2	4279388	4280449	D	24300309	-	RHE_RS20655	WP_011427227.1	353	COG2269	J	EF-P lysine aminoacylase GenX	3984
RHE_RS27920	D	RHE_RS27920_m2	D	-76	-51	TGACTGACGGATTAGTCAATGAAACT	6.9	1.9e-06	-13174	5721		RHE_RS20825																								RHE_RS20625	2	4274347	4275123	D	24297746	-	RHE_RS20625	WP_020922565.1	258	COG2188	K	GntR family transcriptional regulator	3978
RHE_RS05815	R	RHE_RS27920_m3	R	-92	-67	TGATTGACTGATCAATCAACAAAAAT	10.4	2.4e-07	-15243	6620		RHE_RS20895																								RHE_RS20530	2	4251739	4251924	D	24300896	-	RHE_RS20530	WP_003543812.1	61	COG0333	J	MULTISPECIES: 50S ribosomal protein L32	3958
RHE_RS05815	R	RHE_RS27920_m3	R	-88	-63	TTTTTGATTGACTGATCAATCAACAA	11.3	1.4e-07	-15782	6854		RHE_RS20930																								RHE_RS20500	2	4245979	4247229	D	24300839	-	RHE_RS20500	WP_011427197.1	416	COG0821	I	4-hydroxy-3-methylbut-2-en-1-yl diphosphate synthase (flavodoxin)	3952
RHE_RS05820	D	RHE_RS27920_m3	D	-113	-88	TTTTTGATTGACTGATCAATCAACAA	11.3	1.4e-07	-15782	6854		RHE_RS20960																								RHE_RS20470	2	4240541	4241113	D	24300947	-	RHE_RS20470	WP_011427191.1	190	COG0431	C	NADPH-dependent oxidoreductase	3946
RHE_RS05820	D	RHE_RS27920_m3	D	-109	-84	TGATTGACTGATCAATCAACAAAAAT	10.4	2.4e-07	-15243	6620		RHE_RS21005																								RHE_RS20110	2	4162525	4163085	D	24298118	-	RHE_RS20110	WP_011427123.1	186	COG1595	K	RNA polymerase sigma factor RpoE	3873
RHE_RS05855	R	RHE_RS27920_m3	R	-71	-46	GAAATGACTCGACATTCAATAAATAT	3.8	7.1e-06	-11855	5149		RHE_RS21030																								RHE_RS19970	2	4135810	4136739	D	24299175	-	RHE_RS19970	WP_011427097.1	309	COG0181	H	hydroxymethylbilane synthase	3845
RHE_RS10345	D	RHE_RS27920_m3	D	-357	-332	GGCATGATTATCGCGTAAGTCAATGA	5.4	3.3e-06	-12622	5481		RHE_RS21035																								RHE_RS19965	2	4134640	4135737	R	24299220	tsaD	RHE_RS19965	WP_042119075.1	365	COG0533	J	tRNA (adenosine(37)-N6)-threonylcarbamoyltransferase complex transferase subunit TsaD	3844
RHE_RS15570	D	RHE_RS27920_m3	D	-121	-96	ATATTTATTAGCCGGGCAATCAAAAA	4.7	4.9e-06	-12226	5310		RHE_RS21040																								RHE_RS19745	2	4091498	4092391	R	24301476	-	RHE_RS19745	WP_011427055.1	297	COG0583	K	MULTISPECIES: LysR family transcriptional regulator	3800
RHE_RS17450	D	RHE_RS27920_m3	D	-41	-16	TATAGGACTGATTAAACGATTAATCA	4.2	5.9e-06	-12041	5229		RHE_RS21050																								RHE_RS19710	2	4083631	4084107	D	24297524	-	RHE_RS19710	WP_011427049.1	158	COG0835	NT	MULTISPECIES: chemotaxis protein CheW	3794
RHE_RS17450	D	RHE_RS27920_m3	D	-37	-12	GGACTGATTAAACGATTAATCAGAAT	5.7	3.0e-06	-12717	5523		RHE_RS21075																								RHE_RS19700	2	4081285	4082220	D	24300728	rocF	RHE_RS19700	WP_011427047.1	311	COG0010	E	arginase	3792
RHE_RS25290	D	RHE_RS27920_m3	D	-34	-9	TTTCTGACTGCCTGATAAGAAAATGG	5.9	2.6e-06	-12860	5585		RHE_RS21080																								RHE_RS19695	2	4080725	4081153	R	24298367	-	RHE_RS19695	WP_011427046.1	142	COG1522	K	MULTISPECIES: Lrp/AsnC family transcriptional regulator	3791
RHE_RS27915	R	RHE_RS27920_m3	R	-66	-41	TGACTGACGGATTAGTCAATGAAACT	17.4	2.1e-09	-19981	8678		RHE_RS21085																								RHE_RS19590	2	4054499	4055662	R	24298005	-	RHE_RS19590	WP_011427028.1	387	COG0523	R	GTP-binding protein	3771
RHE_RS27915	R	RHE_RS27920_m3	R	-62	-37	TAATTGACTGACGGATTAGTCAATGA	24.4	1.8e-12	-27043	11745		RHE_RS21130																								RHE_RS19205	2	3983417	3985684	R	24299218	ptsP	RHE_RS19205	WP_011426958.1	755	COG3605	T	phosphoenolpyruvate--protein phosphotransferase	3695
RHE_RS27920	D	RHE_RS27920_m3	D	-80	-55	TAATTGACTGACGGATTAGTCAATGA	24.4	1.8e-12	-27043	11745		RHE_RS21205																								RHE_RS18990	2	3934839	3936062	R	24298969	-	RHE_RS18990	WP_011426924.1	407	COG2114	T	adenylate/guanylate cyclase domain-containing protein	3658
RHE_RS27920	D	RHE_RS27920_m3	D	-76	-51	TGACTGACGGATTAGTCAATGAAACT	17.4	2.1e-09	-19981	8678		RHE_RS21225																								RHE_RS18940	2	3923647	3924558	D	24299384	-	RHE_RS18940	WP_011426916.1	303	COG3386	G	SMP-30/gluconolactonase/LRE family protein	3648
RHE_RS08785	D	RHE_RS27920_m4	D	-32	-16	ATCAGTCAGTGATGACG	10.3	2.8e-06	-12786	5553		RHE_RS21275																								RHE_RS18845	2	3901073	3901990	D	24301157	-	RHE_RS18845	WP_042119040.1	305	COG1940	KG	N-acetylglucosamine kinase	3630
RHE_RS15405	R	RHE_RS27920_m4	R	-66	-50	ATAGGTCAGTAATATTG	10.9	1.8e-06	-13228	5745		RHE_RS21355																								RHE_RS18590	2	3845811	3846449	R	24301246	-	RHE_RS18590	WP_011426848.1	212	COG0800	G	ketohydroxyglutarate aldolase	3580
RHE_RS20610	R	RHE_RS27920_m4	R	-89	-73	ATCAGTCATTAAAGTGT	9.7	4.8e-06	-12247	5319		RHE_RS21400																								RHE_RS18580	2	3844219	3844914	R	24301287	-	RHE_RS18580	WP_011426846.1	231	COG1670	JO	N-acetyltransferase	3578
RHE_RS23365	R	RHE_RS27920_m4	R	-198	-182	AAAAGTCAATAAAAAAT	8.6	9.7e-06	-11543	5013		RHE_RS21415																								RHE_RS18380	2	3798535	3799797	D	24299316	glgC	RHE_RS18380	WP_011426810.1	420	COG0448	G	glucose-1-phosphate adenylyltransferase	3538
RHE_RS23370	D	RHE_RS27920_m4	D	-160	-144	AAAAGTCAATAAAAAAT	8.6	9.7e-06	-11543	5013		RHE_RS21900																								RHE_RS18350	2	3785563	3788886	D	24298448	-	RHE_RS18350	WP_011426804.1	1107	COG1305	O	IMP dehydrogenase	3532
RHE_RS27915	R	RHE_RS27920_m4	R	-67	-51	ATTAGTCAATGAAACTT	9.2	6.9e-06	-11884	5161		RHE_RS21915																								RHE_RS18340	2	3783396	3784073	D	24298546	-	RHE_RS18340	WP_011426802.1	225	COG0745	TK	DNA-binding response regulator	3530
RHE_RS27920	D	RHE_RS27920_m4	D	-66	-50	ATTAGTCAATGAAACTT	9.2	6.9e-06	-11884	5161		RHE_RS21975																								RHE_RS18295	2	3773551	3774258	R	24299463	-	RHE_RS18295	WP_011426795.1	235	COG1525	L	hypothetical protein	3520
RHE_RS05815	R	RHE_RS27920_m5	R	-80	-65	TTTGATTGACTGATCA	14.3	9.1e-08	-16212	7041		RHE_RS22020																								RHE_RS18110	2	3731204	3731689	R	24300507	-	RHE_RS18110	WP_011426762.1	161	COG5480	S	MULTISPECIES: DUF1036 domain-containing protein	3484
RHE_RS05820	D	RHE_RS27920_m5	D	-111	-96	TTTGATTGACTGATCA	14.3	9.1e-08	-16212	7041		RHE_RS22030																								RHE_RS18100	2	3729005	3729637	R	24300527	-	RHE_RS18100	WP_011426760.1	210	COG1280	E	LysE family translocator	3482
RHE_RS20060	R	RHE_RS27920_m5	R	-281	-266	GATTATTGACTGATCC	10.3	2.0e-06	-13122	5699		RHE_RS22060																								RHE_RS17980	2	3705104	3706930	R	24298154	-	RHE_RS17980	WP_042118997.1	608	COG0840	NT	methyl-accepting chemotaxis protein	3458
RHE_RS27915	R	RHE_RS27920_m5	R	-50	-35	TATAATTGACTGACGG	15.8	2.4e-08	-17545	7620		RHE_RS22090																								RHE_RS17755	2	3659632	3660378	D	24301189	-	RHE_RS17755	WP_011426698.1	248	COG0217	KJ	YebC/PmpR family DNA-binding transcriptional regulator	3414
RHE_RS27920	D	RHE_RS27920_m5	D	-82	-67	TATAATTGACTGACGG	15.8	2.4e-08	-17545	7620		RHE_RS22160																								RHE_RS17565	2	3618676	3619410	R	24299849	-	RHE_RS17565	WP_011426663.1	244	COG5446	R	membrane protein	3376
RHE_RS06050	R	RHE_RS27845_m1	R	-174	-159	AGCGCAGGAATTCGGC	8.4	9.4e-06	-11575	5027		RHE_RS22190																								RHE_RS16945	2	3474788	3475306	R	24299276	-	RHE_RS16945	WP_011426547.1	172			hypothetical protein	3261
RHE_RS27845	R	RHE_RS27845_m1	R	-106	-91	ATCGCAGAAATTCGTC	15.2	3.6e-08	-17140	7444		RHE_RS22210																								RHE_RS16935	2	3473104	3473925	R	24300346	-	RHE_RS16935	WP_042118949.1	273	COG0829	O	urease accessory protein	3259
RHE_RS27845	R	RHE_RS27845_m2	R	-66	-53	GCAGATTATCTGCA	13.7	1.8e-07	-15530	6745		RHE_RS22570																								RHE_RS16185	2	3319386	3320381	R	24299177	-	RHE_RS16185	WP_020922003.1	331	COG3802	S	fumarylacetoacetate hydrolase	3114
RHE_RS27845	R	RHE_RS27845_m2	R	-35	-22	GGTGAGTTTCTGCA	9.6	6.9e-06	-11884	5161		RHE_RS22605																								RHE_RS16180	2	3317884	3319317	R	24299163	-	RHE_RS16180	WP_011426397.1	477	COG1012	C	aldehyde dehydrogenase family protein	3113
RHE_RS06050	R	RHE_RS27845_m3	R	-177	-158	AAGCGCAGGAATTCGGCGCC	8.5	8.3e-06	-11699	5081		RHE_RS22735																								RHE_RS16135	2	3308142	3309131	D	24298485	-	RHE_RS16135	WP_011426389.1	329	COG2207	K	AraC family transcriptional regulator	3104
RHE_RS27845	R	RHE_RS27845_m3	R	-109	-90	AATCGCAGAAATTCGTCGCG	14.5	7.7e-08	-16379	7114		RHE_RS22770																								RHE_RS15965	2	3269235	3270728	R	24300272	glpK	RHE_RS15965	WP_011426358.1	497	COG0554	C	glycerol kinase	3070
RHE_RS27845	R	RHE_RS27845_m3	R	-68	-49	TAACGCAGATTATCTGCACA	16.1	1.0e-08	-18421	8000		RHE_RS22830																								RHE_RS15725	2	3215235	3217424	R	24298519	-	RHE_RS15725	WP_011426312.1	729	COG0147	EH	anthranilate synthase component I	3026
RHE_RS03180	D	RHE_RS27845_m4	D	-183	-168	TCAGTATATCTGCCCG	9.4	6.1e-06	-12007	5215		RHE_RS22845																								RHE_RS15605	2	3191002	3191625	R	24301612	-	RHE_RS15605	WP_011426291.1	207	COG3816	S	DUF1285 domain-containing protein	3004
RHE_RS27845	R	RHE_RS27845_m4	R	-68	-53	GCAGATTATCTGCACA	17.2	5.2e-10	-21377	9284		RHE_RS22910																								RHE_RS15450	2	3159930	3160724	D	24299202	-	RHE_RS15450	WP_020921901.1	264	COG1496	P	peptidoglycan editing factor PgeF	2974
RHE_RS27845	R	RHE_RS27845_m4	R	-37	-22	GGTGAGTTTCTGCACG	10.1	3.8e-06	-12481	5420		RHE_RS22915																								RHE_RS15025	2	3068203	3068508	R	24297915	-	RHE_RS15025	WP_011426180.1	101			hypothetical protein	2892
RHE_RS02635	R	RHE_RS27750_m1	R	-41	-22	ATATGTTACCCGTATCTTAT	6.8	2.4e-06	-12940	5620		RHE_RS22940																								RHE_RS14920	2	3051257	3051625	R	24298539	-	RHE_RS14920	WP_042119285.1	122	COG0784	T	response regulator	2872
RHE_RS03380	R	RHE_RS27750_m1	R	-338	-319	GAACGAGACCGGTATTTTTA	8.1	1.2e-06	-13633	5921		RHE_RS22955																								RHE_RS14150	2	2881565	2882188	D	24298299	-	RHE_RS14150	WP_011426011.1	207	COG1309	K	TetR/AcrR family transcriptional regulator	2722
RHE_RS13025	R	RHE_RS27750_m1	R	-44	-25	ATATGAGACCGCTTTCATTG	7.3	1.8e-06	-13228	5745		RHE_RS23015																								RHE_RS14135	2	2879011	2879475	R	24298124	-	RHE_RS14135	WP_011426008.1	154	COG1522	K	Lrp/AsnC family transcriptional regulator	2719
RHE_RS26875	R	RHE_RS27750_m1	R	-137	-118	TACCGATACCGGTATCGATA	7.1	2.1e-06	-13074	5678		RHE_RS23055																								RHE_RS14050	2	2857820	2858839	R	24297842	-	RHE_RS14050	WP_004668557.1	339	COG0059	EH	MULTISPECIES: ketol-acid reductoisomerase	2703
RHE_RS27745	R	RHE_RS27750_m1	R	-128	-109	AAAAGAGACCGGTCTCACGA	19.2	7.3e-10	-21038	9137		RHE_RS23065																								RHE_RS13770	2	2802321	2803223	R	24297597	-	RHE_RS13770	WP_011425940.1	300	COG0583	K	LysR family transcriptional regulator	2650
RHE_RS27745	R	RHE_RS27750_m1	R	-107	-88	CAATGATACCGGTCTCCAAT	14.9	2.6e-08	-17465	7585		RHE_RS23080																								RHE_RS13730	2	2795399	2796367	R	24300738	-	RHE_RS13730	WP_011425932.1	322	COG4594	P	ferrichrome ABC transporter substrate-binding protein	2641
RHE_RS27750	D	RHE_RS27750_m1	D	-98	-79	CAATGATACCGGTCTCCAAT	14.9	2.6e-08	-17465	7585		RHE_RS23130																								RHE_RS13295	2	2706372	2707193	R	24300892	-	RHE_RS13295	WP_011425847.1	273	COG2207	K	AraC family transcriptional regulator	2561
RHE_RS27750	D	RHE_RS27750_m1	D	-77	-58	AAAAGAGACCGGTCTCACGA	19.2	7.3e-10	-21038	9137		RHE_RS23165																								RHE_RS13215	2	2692971	2693621	R	24298427	-	RHE_RS13215	WP_011425833.1	216	COG1309	K	TetR/AcrR family transcriptional regulator	2547
RHE_RS02635	R	RHE_RS27750_m2	R	-40	-21	GATATGTTACCCGTATCTTA	6.2	3.2e-06	-12652	5495		RHE_RS23180																								RHE_RS13020	2	2655480	2656802	R	24301046	-	RHE_RS13020	WP_011425798.1	440	COG3921	S	extensin	2510
RHE_RS03380	R	RHE_RS27750_m2	R	-337	-318	AGAACGAGACCGGTATTTTT	8.0	1.3e-06	-13553	5886		RHE_RS23185																								RHE_RS12940	2	2641578	2641934	D	24297485	-	RHE_RS12940	WP_011425784.1	118	COG0640	K	ArsR family transcriptional regulator	2496
RHE_RS13025	R	RHE_RS27750_m2	R	-43	-24	GATATGAGACCGCTTTCATT	7.7	1.6e-06	-13346	5796		RHE_RS23190																								RHE_RS12915	2	2635614	2636633	D	24299323	-	RHE_RS12915	WP_042118637.1	339	COG4977	K	GlxA family transcriptional regulator	2491
RHE_RS26875	R	RHE_RS27750_m2	R	-136	-117	TTACCGATACCGGTATCGAT	7.1	2.1e-06	-13074	5678		RHE_RS23325																								RHE_RS12525	2	2559718	2560455	R	24298667	-	RHE_RS12525	WP_011425706.1	245	COG1028	IQR	short chain dehydrogenase	2417
RHE_RS27745	R	RHE_RS27750_m2	R	-127	-108	CAAAAGAGACCGGTCTCACG	18.0	2.6e-09	-19768	8585		RHE_RS23350																								RHE_RS12460	2	2549252	2549740	R	24300353	-	RHE_RS12460	WP_011425694.1	162	COG1522	K	Lrp/AsnC family transcriptional regulator	2405
RHE_RS27745	R	RHE_RS27750_m2	R	-106	-87	GCAATGATACCGGTCTCCAA	14.2	4.3e-08	-16962	7367		RHE_RS23365																								RHE_RS12100	2	2476131	2477195	D	24300938	-	RHE_RS12100	WP_011425628.1	354	COG0722	E	3-deoxy-7-phosphoheptulonate synthase	2339
RHE_RS27750	D	RHE_RS27750_m2	D	-99	-80	GCAATGATACCGGTCTCCAA	14.2	4.3e-08	-16962	7367		RHE_RS23370																								RHE_RS11945	2	2438625	2438945	R	24299678	-	RHE_RS11945	WP_011425597.1	106	COG0633	C	MULTISPECIES: (2Fe-2S) ferredoxin	2310
RHE_RS27750	D	RHE_RS27750_m2	D	-78	-59	CAAAAGAGACCGGTCTCACG	18.0	2.6e-09	-19768	8585		RHE_RS23380																								RHE_RS11820	2	2410017	2411528	R	24300444	-	RHE_RS11820	WP_042118546.1	503	COG0433	L	ATP-binding protein	2285
RHE_RS02635	R	RHE_RS27750_m3	R	-42	-21	GATATGTTACCCGTATCTTATA	7.4	1.5e-06	-13410	5824		RHE_RS23385																								RHE_RS11765	2	2399858	2401048	R	24297955	-	RHE_RS11765	WP_011425562.1	396			hypothetical protein	2274
RHE_RS03380	R	RHE_RS27750_m3	R	-339	-318	AGAACGAGACCGGTATTTTTAA	8.7	7.9e-07	-14051	6102		RHE_RS23415																								RHE_RS11685	2	2386319	2388550	D	24298816	-	RHE_RS11685	WP_011425546.1	743	COG0046	F	phosphoribosylformylglycinamidine synthase subunit PurL	2258
RHE_RS13025	R	RHE_RS27750_m3	R	-45	-24	GATATGAGACCGCTTTCATTGT	7.6	1.3e-06	-13553	5886		RHE_RS23445																								RHE_RS11640	2	2378324	2380618	D	24298147	-	RHE_RS11640	WP_011425537.1	764	COG2202	T	GGDEF domain-containing protein	2249
RHE_RS26875	R	RHE_RS27750_m3	R	-138	-117	TTACCGATACCGGTATCGATAA	7.7	1.3e-06	-13553	5886		RHE_RS23450																								RHE_RS11635	2	2377675	2378232	D	24297991	-	RHE_RS11635	WP_011425536.1	185	COG3545	R	serine hydrolase family protein	2248
RHE_RS27745	R	RHE_RS27750_m3	R	-129	-108	CAAAAGAGACCGGTCTCACGAC	18.4	1.7e-09	-20193	8770		RHE_RS23465																								RHE_RS11615	2	2374294	2375601	D	24300579	-	RHE_RS11615	WP_011425533.1	435	COG0015	F	adenylosuccinate lyase	2245
RHE_RS27745	R	RHE_RS27750_m3	R	-108	-87	GCAATGATACCGGTCTCCAATC	14.7	2.7e-08	-17427	7569		RHE_RS23470																								RHE_RS11435	2	2337231	2338229	R	24299665	-	RHE_RS11435	WP_042118517.1	332	COG0564	J	RluA family pseudouridine synthase	2209
RHE_RS27750	D	RHE_RS27750_m3	D	-99	-78	GCAATGATACCGGTCTCCAATC	14.7	2.7e-08	-17427	7569		RHE_RS23500																								RHE_RS11385	2	2328489	2330498	D	24300894	-	RHE_RS11385	WP_011425487.1	669	COG4770	I	acetyl/propionyl/methylcrotonyl-CoA carboxylase subunit alpha	2199
RHE_RS27750	D	RHE_RS27750_m3	D	-78	-57	CAAAAGAGACCGGTCTCACGAC	18.4	1.7e-09	-20193	8770		RHE_RS23520																								RHE_RS11380	2	2327676	2328380	D	24300895	-	RHE_RS11380	WP_011425486.1	234			hypothetical protein	2198
RHE_RS02635	R	RHE_RS27750_m4	R	-40	-21	GATATGTTACCCGTATCTTA	4.7	5.4e-06	-12129	5268		RHE_RS23535																								RHE_RS11300	2	2314561	2315346	D	24301422	-	RHE_RS11300	WP_041678653.1	261			hypothetical protein	2183
RHE_RS03380	R	RHE_RS27750_m4	R	-337	-318	AGAACGAGACCGGTATTTTT	8.0	1.2e-06	-13633	5921		RHE_RS23540																								RHE_RS11220	2	2300592	2301176	R	24301346	-	RHE_RS11220	WP_011425456.1	194	COG0778	C	nitroreductase	2167
RHE_RS13025	R	RHE_RS27750_m4	R	-43	-24	GATATGAGACCGCTTTCATT	7.7	1.4e-06	-13479	5854		RHE_RS23550																								RHE_RS11170	2	2289575	2291203	R	24299457	-	RHE_RS11170	WP_011425446.1	542	COG0504	F	CTP synthetase	2157
RHE_RS26875	R	RHE_RS27750_m4	R	-136	-117	TTACCGATACCGGTATCGAT	5.1	4.5e-06	-12311	5347		RHE_RS23555																								RHE_RS11145	2	2282640	2284595	R	24298603	-	RHE_RS11145	WP_011425442.1	651	COG0513	L	ATP-dependent helicase	2153
RHE_RS27745	R	RHE_RS27750_m4	R	-127	-108	CAAAAGAGACCGGTCTCACG	18.0	2.7e-09	-19730	8569		RHE_RS23570																								RHE_RS10825	2	2215315	2215824	D	24301261	-	RHE_RS10825	WP_011425381.1	169	COG0652	O	peptidylprolyl isomerase	2091
RHE_RS27745	R	RHE_RS27750_m4	R	-106	-87	GCAATGATACCGGTCTCCAA	14.3	3.7e-08	-17112	7432		RHE_RS23585																								RHE_RS10485	2	2139378	2140328	D	24299247	-	RHE_RS10485	WP_011425315.1	316	COG0583	K	MULTISPECIES: LysR family transcriptional regulator	2022
RHE_RS27750	D	RHE_RS27750_m4	D	-99	-80	GCAATGATACCGGTCTCCAA	14.3	3.7e-08	-17112	7432		RHE_RS23630																								RHE_RS09725	2	1986441	1986644	D	24298624	-	RHE_RS09725	WP_011425185.1	67			MULTISPECIES: DUF3126 domain-containing protein	1871
RHE_RS27750	D	RHE_RS27750_m4	D	-78	-59	CAAAAGAGACCGGTCTCACG	18.0	2.7e-09	-19730	8569		RHE_RS23635																								RHE_RS09535	2	1950050	1950490	D	24299063	-	RHE_RS09535	WP_011425153.1	146	COG4765	S	DUF2155 domain-containing protein	1837
RHE_RS06960	D	RHE_RS27750_m5	D	-127	-100	GAAAACAATTCTCTTTGAAGTGGAGAGA	11.0	4.2e-07	-14683	6377		RHE_RS23665																								RHE_RS09255	2	1893725	1894594	D	24300723	-	RHE_RS09255	WP_011425100.1	289	COG3827	D	DUF2497 domain-containing protein	1783
RHE_RS27745	R	RHE_RS27750_m5	R	-118	-91	TGATACCGGTCTCCAATCAAAAGAGACC	9.3	1.1e-06	-13720	5959		RHE_RS23695																								RHE_RS08995	2	1845961	1847211	D	24299962	-	RHE_RS08995	WP_042118298.1	416	COG1171	E	threonine ammonia-lyase	1733
RHE_RS27745	R	RHE_RS27750_m5	R	-116	-89	AATGATACCGGTCTCCAATCAAAAGAGA	7.9	2.5e-06	-12899	5602		RHE_RS23770																								RHE_RS08970	2	1839612	1840106	R	24300151	-	RHE_RS08970	WP_010025058.1	164	COG2236	H	MULTISPECIES: xanthine phosphoribosyltransferase	1728
RHE_RS27750	D	RHE_RS27750_m5	D	-97	-70	AATGATACCGGTCTCCAATCAAAAGAGA	7.9	2.5e-06	-12899	5602		RHE_RS23775																								RHE_RS08765	2	1794723	1795286	R	24300482	-	RHE_RS08765	WP_011425006.1	187	COG3613	F	nucleoside 2-deoxyribosyltransferase	1689
RHE_RS27750	D	RHE_RS27750_m5	D	-95	-68	TGATACCGGTCTCCAATCAAAAGAGACC	9.3	1.1e-06	-13720	5959		RHE_RS23835																								RHE_RS08700	2	1782494	1782916	D	24297615	-	RHE_RS08700	WP_011424993.1	140	COG0203	J	MULTISPECIES: 50S ribosomal protein L17	1676
RHE_RS16350	D	RHE_RS27645_m1	D	-61	-47	GTTCTTACAGGTGAT	9.9	6.5e-06	-11944	5187		RHE_RS23880																								RHE_RS08540	2	1758516	1762724	D	24297875	rpoC	RHE_RS08540	WP_011424976.1	1402	COG0086	K	DNA-directed RNA polymerase subunit beta\'	1644
RHE_RS27645	D	RHE_RS27645_m1	D	-248	-234	GAGTTGACAGATAAT	13.9	6.0e-08	-16629	7222		RHE_RS23885																								RHE_RS08240	2	1690010	1692091	D	24299990	-	RHE_RS08240	WP_011424930.1	693	COG1034	C	NADH-quinone oxidoreductase subunit G	1588
RHE_RS27645	D	RHE_RS27645_m1	D	-238	-224	ATAATTACAGATTCG	11.6	2.0e-06	-13122	5699		RHE_RS23935																								RHE_RS08215	2	1685131	1686321	D	24298243	-	RHE_RS08215	WP_011424925.1	396	COG0649	C	NADH-quinone oxidoreductase subunit D 1	1583
RHE_RS14770	D	RHE_RS27645_m2	D	-86	-65	ATGACAGCAGTTGACATGGATT	8.0	1.6e-06	-13346	5796		RHE_RS23945																								RHE_RS08080	2	1661497	1662015	D	24298259	-	RHE_RS08080	WP_042119229.1	172	COG0703	E	hypothetical protein	1561
RHE_RS16350	D	RHE_RS27645_m2	D	-68	-47	ATTGCCAGTTCTTACAGGTGAT	6.1	4.2e-06	-12380	5377		RHE_RS23955																								RHE_RS08055	2	1657620	1658903	D	24300570	-	RHE_RS08055	WP_011424904.1	427	COG2873	E	aminotransferase class V-fold PLP-dependent enzyme	1556
RHE_RS19540	R	RHE_RS27645_m2	R	-56	-35	ACAACAAGAATTGACAAATGGG	7.2	2.4e-06	-12940	5620		RHE_RS23965																								RHE_RS07800	2	1607987	1608520	R	24298665	-	RHE_RS07800	WP_020920958.1	177	COG2913	M	outer membrane protein assembly factor BamE	1510
RHE_RS19545	D	RHE_RS27645_m2	D	-75	-54	ACAACAAGAATTGACAAATGGG	7.2	2.4e-06	-12940	5620		RHE_RS24075																								RHE_RS07350	2	1510727	1511185	R	24301173	-	RHE_RS07350	WP_011424774.1	152			MULTISPECIES: 30S ribosomal protein S6	1419
RHE_RS24095	R	RHE_RS27645_m2	R	-35	-14	TTTACAGCAGTGTCCAAATTAA	4.6	8.6e-06	-11664	5066		RHE_RS24090																								RHE_RS07315	2	1504940	1505761	D	24297877	-	RHE_RS07315	WP_011424768.1	273	COG2207	K	AraC family transcriptional regulator	1412
RHE_RS27645	D	RHE_RS27645_m2	D	-255	-234	ATTACAAGAGTTGACAGATAAT	21.2	4.7e-11	-23781	10328		RHE_RS24095																								RHE_RS07305	2	1502944	1503579	D	24298645	-	RHE_RS07305	WP_042119218.1	211	COG1280	E	LysE family translocator	1410
RHE_RS27645	D	RHE_RS27645_m2	D	-245	-224	TTGACAGATAATTACAGATTCG	19.9	3.2e-10	-21863	9495		RHE_RS24105																								RHE_RS07300	2	1501377	1502777	R	24299555	-	RHE_RS07300	WP_011424765.1	466	COG1066	O	DNA repair protein RadA	1409
RHE_RS29200	R	RHE_RS27645_m2	R	-123	-102	ATTTCAGGATATTTCAGATTCG	4.5	9.0e-06	-11618	5046		RHE_RS24110																								RHE_RS07075	2	1459317	1461551	D	24298439	-	RHE_RS07075	WP_011424720.1	744	COG0317	TK	bifunctional (p)ppGpp synthetase/guanosine-3\',5\'-bis(diphosphate) 3\'-pyrophosphohydrolase	1363
RHE_RS29205	D	RHE_RS27645_m2	D	-144	-123	ATTTCAGGATATTTCAGATTCG	4.5	9.0e-06	-11618	5046		RHE_RS24230																								RHE_RS06620	2	1341246	1341992	D	24298453	-	RHE_RS06620	WP_041678849.1	248	COG0745	TK	DNA-binding response regulator	1272
RHE_RS11855	D	RHE_RS27645_m3	D	-16	-4	GGAGGAGGAATGT	9.8	8.4e-06	-11687	5076		RHE_RS24270																								RHE_RS06580	2	1332690	1333361	D	24301574	-	RHE_RS06580	WP_011424625.1	223	COG0745	TK	DNA-binding response regulator	1264
RHE_RS14175	D	RHE_RS27645_m3	D	-314	-302	CAGGGAGGAATGT	10.6	4.4e-06	-12334	5357		RHE_RS24330																								RHE_RS06535	2	1325425	1326318	R	24298369	-	RHE_RS06535	WP_011424616.1	297	COG0583	K	LysR family transcriptional regulator	1255
RHE_RS18935	D	RHE_RS27645_m3	D	-16	-4	CAGGGAGGAACCA	9.7	9.0e-06	-11618	5046		RHE_RS24350																								RHE_RS06435	2	1308506	1308850	D	24301557	-	RHE_RS06435	WP_011424594.1	114	COG5447	S	DUF1491 domain-containing protein	1236
RHE_RS22160	D	RHE_RS27645_m3	D	-16	-4	CTGGGAGGAATGC	11.3	2.3e-06	-12983	5638		RHE_RS24370																								RHE_RS06000	2	1224510	1224794	D	24298793	-	RHE_RS06000	WP_011424509.1	94			hypothetical protein	1148
RHE_RS23190	D	RHE_RS27645_m3	D	-14	-2	CAAGGAGGAAAGA	11.4	2.0e-06	-13122	5699		RHE_RS24400																								RHE_RS05865	2	1199843	1200463	D	24300906	-	RHE_RS05865	WP_011424488.1	206	COG0625	O	glutathione S-transferase family protein	1124
RHE_RS27645	D	RHE_RS27645_m3	D	-21	-9	GGGGGAGAAAAGA	10.8	3.6e-06	-12535	5444		RHE_RS24445																								RHE_RS05570	2	1140332	1140568	D	24301169	-	RHE_RS05570	WP_004678143.1	78			MULTISPECIES: hypothetical protein	1069
RHE_RS28420	R	RHE_RS27645_m3	R	-339	-327	AGGGGAGGAAAAA	10.1	6.4e-06	-11959	5194		RHE_RS24455																								RHE_RS05450	2	1119435	1120289	R	24298007	-	RHE_RS05450	WP_011424410.1	284			hypothetical protein	1046
RHE_RS28425	D	RHE_RS27645_m3	D	-15	-3	AGGGGAGGAAAAA	10.1	6.4e-06	-11959	5194		RHE_RS24475																								RHE_RS05265	2	1087781	1088035	D	24298606	-	RHE_RS05265	WP_041678841.1	84			DNA-directed RNA polymerase sigma-70 factor	1012
RHE_RS03405	D	RHE_RS27645_m4	D	-108	-96	TGCCGGCGCAAGG	10.2	1.3e-06	-13553	5886		RHE_RS24480																								RHE_RS04855	2	1010211	1011176	D	24301069	-	RHE_RS04855	WP_011424309.1	321	COG2334	T	homoserine kinase	931
RHE_RS23955	R	RHE_RS27645_m4	R	-30	-18	AGCCGGCGCAGAC	9.5	9.4e-06	-11575	5027		RHE_RS24540																								RHE_RS04835	2	1007024	1007665	R	24301569	-	RHE_RS04835	WP_011424305.1	213	COG3896	V	chloramphenicol phosphotransferase	927
RHE_RS25040	R	RHE_RS27645_m4	R	-156	-144	TCCCGGCGCAGCG	9.6	7.9e-06	-11749	5102		RHE_RS24565																								RHE_RS04235	2	881743	883089	D	24297769	-	RHE_RS04235	WP_011424190.1	448	COG0312	R	TldD/PmbA family protein	810
RHE_RS14770	D	RHE_RS27645_m5	D	-86	-65	ATGACAGCAGTTGACATGGATT	8.0	1.6e-06	-13346	5796		RHE_RS24620																								RHE_RS04120	2	855997	857046	D	24301121	-	RHE_RS04120	WP_011424168.1	349	COG0667	R	aldo/keto reductase	787
RHE_RS16350	D	RHE_RS27645_m5	D	-68	-47	ATTGCCAGTTCTTACAGGTGAT	6.1	4.2e-06	-12380	5377		RHE_RS24655																								RHE_RS04080	2	849291	850601	D	24299846	-	RHE_RS04080	WP_011424160.1	436	COG0247	C	glycolate oxidase iron-sulfur subunit	779
RHE_RS19540	R	RHE_RS27645_m5	R	-56	-35	ACAACAAGAATTGACAAATGGG	7.2	2.4e-06	-12940	5620		RHE_RS24725																								RHE_RS04060	2	844500	845009	R	24299422	-	RHE_RS04060	WP_011424156.1	169	COG1051	F	NUDIX domain-containing protein	775
RHE_RS19545	D	RHE_RS27645_m5	D	-75	-54	ACAACAAGAATTGACAAATGGG	7.2	2.4e-06	-12940	5620		RHE_RS24735																								RHE_RS03695	2	768268	769764	D	24299432	mmsA	RHE_RS03695	WP_011424092.1	498	COG1012	C	methylmalonate-semialdehyde dehydrogenase (CoA acylating)	706
RHE_RS24095	R	RHE_RS27645_m5	R	-35	-14	TTTACAGCAGTGTCCAAATTAA	4.6	8.6e-06	-11664	5066		RHE_RS24755																								RHE_RS03490	2	708151	708516	D	24300757	-	RHE_RS03490	WP_011424054.1	121			hypothetical protein	668
RHE_RS27645	D	RHE_RS27645_m5	D	-255	-234	ATTACAAGAGTTGACAGATAAT	21.2	4.7e-11	-23781	10328		RHE_RS24760																								RHE_RS03405	2	692313	692942	D	24297520	-	RHE_RS03405	WP_011424038.1	209			hypothetical protein	651
RHE_RS27645	D	RHE_RS27645_m5	D	-245	-224	TTGACAGATAATTACAGATTCG	19.9	3.2e-10	-21863	9495		RHE_RS24850																								RHE_RS03195	2	651050	653599	R	24301225	-	RHE_RS03195	WP_011423996.1	849	COG0341	U	protein translocase subunit SecDF	609
RHE_RS29200	R	RHE_RS27645_m5	R	-123	-102	ATTTCAGGATATTTCAGATTCG	4.5	9.0e-06	-11618	5046		RHE_RS24890																								RHE_RS03000	2	612592	613485	D	24300061	-	RHE_RS03000	WP_011423958.1	297	COG0583	K	LysR family transcriptional regulator	570
RHE_RS29205	D	RHE_RS27645_m5	D	-144	-123	ATTTCAGGATATTTCAGATTCG	4.5	9.0e-06	-11618	5046		RHE_RS24980																								RHE_RS02955	2	606464	606682	D	24299611	-	RHE_RS02955	WP_003545338.1	72	COG0361	J	MULTISPECIES: translation initiation factor IF-1	563
RHE_RS07925	R	RHE_RS27600_m1	R	-292	-276	CAAAGAGGAATCGGCTC	9.9	7.6e-06	-11787	5119		RHE_RS25040																								RHE_RS02710	2	554463	555134	R	24301630	-	RHE_RS02710	WP_011423907.1	223	COG2932	X	helix-turn-helix transcriptional regulator	515
RHE_RS27600	D	RHE_RS27600_m1	D	-119	-103	AAAAGACGATGCGGCGC	11.8	9.6e-07	-13856	6018		RHE_RS25060																								RHE_RS02675	2	548200	549021	D	24298731	-	RHE_RS02675	WP_011423900.1	273	COG4221	C	oxidoreductase	509
RHE_RS27600	D	RHE_RS27600_m1	D	-100	-84	GCAATGGGTTTCGGCTC	12.8	2.4e-07	-15243	6620		RHE_RS25065																								RHE_RS02600	2	532567	533250	D	24301529	phoB	RHE_RS02600	WP_004672768.1	227	COG0745	TK	MULTISPECIES: phosphate regulon transcriptional regulatory protein PhoB	496
RHE_RS27600	D	RHE_RS27600_m2	D	-121	-103	AAAAAAGACGATGCGGCGC	12.1	7.7e-07	-14077	6114		RHE_RS25150																								RHE_RS02115	2	431738	432931	R	24300863	-	RHE_RS02115	WP_042117802.1	397	COG0624	E	succinyl-diaminopimelate desuccinylase	404
RHE_RS27600	D	RHE_RS27600_m2	D	-65	-47	CTAAATTAAAGTTCGGGGA	12.0	8.8e-07	-13943	6056		RHE_RS25185																								RHE_RS01540	2	311772	313046	R	24297578	-	RHE_RS01540	WP_011423688.1	424	COG3487	S	peptidase	291
RHE_RS19590	R	RHE_RS27600_m3	R	-25	-1	ATATCTGCTTTTACCTTAAAAAGCC	6.6	2.7e-06	-12822	5569		RHE_RS25250																								RHE_RS01315	2	271853	272389	D	24297536	-	RHE_RS01315	WP_073990355.1	178	COG0290	J	MULTISPECIES: translation initiation factor IF-3	249
RHE_RS19670	R	RHE_RS27600_m3	R	-283	-259	GGTTCTGATTCGCGGATTAGAACCC	5.0	6.2e-06	-11991	5208		RHE_RS25290																								RHE_RS01160	2	244368	245975	D	24299039	-	RHE_RS01160	WP_011423619.1	535	COG3206	M	sugar transporter	219
RHE_RS20585	R	RHE_RS27600_m3	R	-275	-251	TTGTCCGCGGCGCGGAAAAAAAGCG	5.0	6.2e-06	-11991	5208		RHE_RS25320																								RHE_RS01155	2	243183	244232	R	24299040	-	RHE_RS01155	WP_011423618.1	349	COG2730	G	cellulase	218
RHE_RS27600	D	RHE_RS27600_m3	D	-137	-113	GTATCCGATTCACGCCAAAAAAGAC	24.7	3.7e-13	-28625	12432		RHE_RS25370																								RHE_RS00870	2	184702	186489	R	24298556	-	RHE_RS00870	WP_011423565.1	595	COG1132	V	ABC transporter ATP-binding protein	164
RHE_RS11765	R	RHE_RS27600_m4	R	-81	-66	TTGGCGAAAACGCAAG	6.0	8.3e-06	-11699	5081		RHE_RS25445																								RHE_RS00735	2	151875	153002	R	24300592	dnaJ	RHE_RS00735	WP_011423538.1	375	COG0484	O	molecular chaperone DnaJ	137
RHE_RS15755	D	RHE_RS27600_m4	D	-176	-161	TCAAAGATACCACAAC	6.0	8.3e-06	-11699	5081		RHE_RS25455																								RHE_RS00670	2	141037	141405	D	24298925	-	RHE_RS00670	WP_011423524.1	122	COG0346	Q	glyoxalase	124
RHE_RS16200	R	RHE_RS27570_m1	R	-245	-231	AAAAGTATTACTTTT	13.5	1.1e-07	-16023	6959		RHE_RS25500																								RHE_RS00575	2	122180	122449	R	24298734	-	RHE_RS00575	WP_009997779.1	89	COG0184	J	MULTISPECIES: 30S ribosomal protein S15, partial	105
RHE_RS16205	D	RHE_RS27570_m1	D	-45	-31	AAAAGTATTACTTTT	13.5	1.1e-07	-16023	6959		RHE_RS25540																								RHE_RS00045	2	5374	6078	D	24298422	-	RHE_RS00045	WP_011423414.1	234	COG4395	I	calcium-binding protein	8
RHE_RS27570	R	RHE_RS27570_m1	R	-26	-12	CTTTGTAATACTCTC	9.5	9.8e-06	-11533	5009		RHE_RS25545																								RHE_RS00040	2	4736	5242	R	24298423	-	RHE_RS00040	WP_011423413.1	168	COG3030	R	membrane protein FxsA	7
RHE_RS15210	R	RHE_RS27570_m2	R	-123	-93	ACAGCAAGGCCATTTGCCTTGTTGGTAATGC	3.9	8.1e-06	-11724	5092		RHE_RS25560																								RHE_RS00015	2	1326	1925	D	24300574	-	RHE_RS00015	WP_011423408.1	199	COG0424	Q	septum formation inhibitor Maf	2
RHE_RS15215	D	RHE_RS27570_m2	D	-143	-113	ACAGCAAGGCCATTTGCCTTGTTGGTAATGC	3.9	8.1e-06	-11724	5092		RHE_RS25595																								RHE_RS31500	1	1259117	1259404	R	30584452	-	RHE_RS31500	WP_011424546.1	95			MurR/RpiR family transcriptional regulator	1186
RHE_RS16200	R	RHE_RS27570_m2	R	-241	-211	ACAATTTTGGTATATCGTTAAAAAGTATTAC	6.7	1.8e-06	-13228	5745		RHE_RS25605																								RHE_RS29495	1	21098	21919	R	24297361	-	RHE_RS29495	WP_008534144.1	273	COG0589	T	MULTISPECIES: universal stress protein	5680
RHE_RS16205	D	RHE_RS27570_m2	D	-65	-35	ACAATTTTGGTATATCGTTAAAAAGTATTAC	6.7	1.8e-06	-13228	5745		RHE_RS25630																								RHE_RS29400	1	635310	636548	D	24302763	-	RHE_RS29400	WP_011428870.1	412	COG1846	K	ROK family transcriptional regulator	5660
RHE_RS27570	R	RHE_RS27570_m2	R	-43	-13	TTTGTAATACTCTCTTGGCAGAAGGTATTGC	23.7	5.2e-12	-25982	11284		RHE_RS25725																								RHE_RS29140	1	584941	586293	R	24302815	hemN	RHE_RS29140	WP_011428822.1	450	COG0635	H	oxygen-independent coproporphyrinogen III oxidase	5608
RHE_RS30890	R	RHE_RS27570_m2	R	-383	-353	CCGGTAAGGCGATTTGGTGGGAGGGTGATAA	4.7	5.3e-06	-12148	5276		RHE_RS25790																								RHE_RS29125	1	580726	582066	D	24302818	-	RHE_RS29125	WP_011428819.1	446	COG3256	P	nitric oxide reductase	5605
RHE_RS16200	R	RHE_RS27570_m3	R	-244	-211	ACAATTTTGGTATATCGTTAAAAAGTATTACTTT	3.4	7.8e-06	-11761	5108		RHE_RS25835																								RHE_RS29080	1	573177	575102	D	24302827	-	RHE_RS29080	WP_042120025.1	641	COG0784	T	hybrid sensor histidine kinase/response regulator	5596
RHE_RS16205	D	RHE_RS27570_m3	D	-65	-32	ACAATTTTGGTATATCGTTAAAAAGTATTACTTT	3.4	7.8e-06	-11761	5108		RHE_RS25840																								RHE_RS28725	1	493583	493927	D	24302898	-	RHE_RS28725	WP_011428746.1	114			transcriptional regulator	5529
RHE_RS27570	R	RHE_RS27570_m3	R	-46	-13	TTTGTAATACTCTCTTGGCAGAAGGTATTGCTAC	26.2	3.5e-13	-28681	12456		RHE_RS25855																								RHE_RS28625	1	475398	476108	D	24302918	-	RHE_RS28625	WP_011428727.1	236	COG1595	K	RNA polymerase sigma factor	5511
RHE_RS29450	D	RHE_RS27570_m3	D	-295	-262	TAAGCATTACTTATCGGAAGCCAGGTGTGGCCTG	3.1	9.1e-06	-11607	5041		RHE_RS25865																								RHE_RS28445	1	437443	439095	D	24302954	-	RHE_RS28445	WP_011428692.1	550	COG0110	R	hexapeptide transferase	5475
RHE_RS17565	R	RHE_RS27570_m4	R	-34	-5	CAGTATTCCCCCTAAGCATGTCGCGCAAAG	9.1	3.2e-06	-12652	5495		RHE_RS25905																								RHE_RS27690	1	259710	260804	D	24303105	-	RHE_RS27690	WP_042120053.1	364			hypothetical protein	5325
RHE_RS27570	R	RHE_RS27570_m4	R	-64	-35	AGGTATTGCTACATTCGGCAAAATTCAAAG	13.9	8.6e-08	-16269	7066		RHE_RS25970																								RHE_RS26920	1	97273	98601	D	24303259	-	RHE_RS26920	WP_011428406.1	442	COG1653	G	sugar ABC transporter substrate-binding protein	5173
RHE_RS00460	R	RHE_RS27570_m5	R	-35	-5	GTAATCCTCCCTGATGGATAGGGCCTACCCC	5.0	4.6e-06	-12289	5337		RHE_RS26000																								RHE_RS26865	1	86242	87063	R	24303270	-	RHE_RS26865	WP_011428395.1	273			DUF1206 domain-containing protein	5162
RHE_RS00465	D	RHE_RS27570_m5	D	-179	-149	GTAATCCTCCCTGATGGATAGGGCCTACCCC	5.0	4.6e-06	-12289	5337		RHE_RS26015																								RHE_RS26850	1	84550	85068	R	24303273	-	RHE_RS26850	WP_042119959.1	172			hypothetical protein	5159
RHE_RS27570	R	RHE_RS27570_m5	R	-46	-16	GTAATACTCTCTTGGCAGAAGGTATTGCTAC	22.8	1.3e-11	-25066	10886		RHE_RS26030																								RHE_RS26840	1	83866	84222	D	24303275	-	RHE_RS26840	WP_011428390.1	118	COG0784	T	MULTISPECIES: response regulator	5157
RHE_RS06345	D	RHE_RS27560_m1	D	-163	-148	GTGAGTGCTAATTTTT	9.9	5.6e-06	-12093	5252		RHE_RS26040																								RHE_RS26800	1	73942	74334	D	24303283	-	RHE_RS26800	WP_011428384.1	130	COG0784	T	response regulator	5149
RHE_RS06955	R	RHE_RS27560_m1	R	-136	-121	ACAGTAGCTAATATAG	11.7	1.2e-06	-13633	5921		RHE_RS26045																								RHE_RS26575	1	31234	32238	R	24303328	-	RHE_RS26575	WP_020919087.1	334	COG2376	G	dihydroxyacetone kinase subunit DhaK	5105
RHE_RS10510	R	RHE_RS27560_m1	R	-111	-96	GCATTTGCTAAAAATA	10.1	4.8e-06	-12247	5319		RHE_RS26050																								RHE_RS26225	1	465353	466258	R	24302318	-	RHE_RS26225	WP_011428274.1	301	COG0034	F	glutamine amidotransferase	5036
RHE_RS10515	D	RHE_RS27560_m1	D	-160	-145	GCATTTGCTAAAAATA	10.1	4.8e-06	-12247	5319		RHE_RS26070																								RHE_RS26040	1	422939	423802	D	24302355	-	RHE_RS26040	WP_042119901.1	287	COG1737	K	MULTISPECIES: MurR/RpiR family transcriptional regulator	4998
RHE_RS15800	D	RHE_RS27560_m1	D	-85	-70	CCAGTTGCTAATTTTG	10.4	3.7e-06	-12507	5432		RHE_RS26095																								RHE_RS25840	1	382994	383701	D	24302395	-	RHE_RS25840	WP_011428202.1	235	COG2186	K	FadR family transcriptional regulator	4959
RHE_RS17200	R	RHE_RS27560_m1	R	-97	-82	ATAGCTAATATTTATA	9.7	6.6e-06	-11928	5180		RHE_RS26105																								RHE_RS25790	1	372289	373092	R	24302405	-	RHE_RS25790	WP_042119898.1	267	COG2145	H	hydroxyethylthiazole kinase	4949
RHE_RS19250	R	RHE_RS27560_m1	R	-136	-121	GCTAATGCTAATACAT	10.5	3.4e-06	-12592	5469		RHE_RS26115																								RHE_RS25725	1	360991	361899	D	24302418	-	RHE_RS25725	WP_042119897.1	302	COG0583	K	LysR family transcriptional regulator	4936
RHE_RS26290	D	RHE_RS27560_m1	D	-148	-133	GCTGCTGCTAATATGA	9.6	7.1e-06	-11855	5149		RHE_RS26165																								RHE_RS25630	1	342957	344444	D	24302437	-	RHE_RS25630	WP_011428160.1	495	COG4964	UW	type II and III secretion system protein family protein	4917
RHE_RS27555	R	RHE_RS27560_m1	R	-280	-265	ACGAATGCTAATATTA	12.6	4.7e-07	-14571	6328		RHE_RS26210																								RHE_RS25445	1	306466	307653	R	24302474	-	RHE_RS25445	WP_011428126.1	395	COG1960	I	acyl-CoA dehydrogenase	4880
RHE_RS27560	D	RHE_RS27560_m1	D	-66	-51	ACGAATGCTAATATTA	12.6	4.7e-07	-14571	6328		RHE_RS26225																								RHE_RS25250	1	268644	269066	D	24302513	-	RHE_RS25250	WP_011428090.1	140			EF-hand domain-containing protein	4845
RHE_RS15570	D	RHE_RS27560_m2	D	-126	-109	GGAGTATATTTATTAGCC	9.7	4.0e-06	-12429	5398		RHE_RS26265																								RHE_RS24890	1	196009	196470	R	24302585	-	RHE_RS24890	WP_011428024.1	153	COG0662	G	cupin domain-containing protein	4776
RHE_RS16200	R	RHE_RS27560_m2	R	-243	-226	CGTTAAAAAGTATTACTT	10.3	2.8e-06	-12786	5553		RHE_RS26280																								RHE_RS24850	1	188188	189024	D	24302593	-	RHE_RS24850	WP_011428015.1	278	COG1917	R	AraC family transcriptional regulator	4768
RHE_RS16205	D	RHE_RS27560_m2	D	-50	-33	CGTTAAAAAGTATTACTT	10.3	2.8e-06	-12786	5553		RHE_RS26285																								RHE_RS24735	1	166543	166890	D	24302616	-	RHE_RS24735	WP_011427995.1	115	COG0640	K	ArsR family transcriptional regulator	4747
RHE_RS16350	D	RHE_RS27560_m2	D	-116	-99	TAATAATTAAGATTAATA	13.5	1.6e-07	-15648	6796		RHE_RS26290																								RHE_RS24445	1	95063	95605	R	24302674	-	RHE_RS24445	WP_011427940.1	180			hypothetical protein	4689
RHE_RS16530	D	RHE_RS27560_m2	D	-202	-185	CACTAATTGTTAAAACTA	9.3	5.4e-06	-12129	5268		RHE_RS26355																								RHE_RS24330	1	74409	74921	D	24302697	-	RHE_RS24330	WP_011427919.1	170	COG5642	S	DUF2384 domain-containing protein	4664
RHE_RS17200	R	RHE_RS27560_m2	R	-101	-84	AGCTAATATTTATAGCTT	9.3	5.4e-06	-12129	5268		RHE_RS26415																								RHE_RS23955	1	233288	234058	R	24302058	-	RHE_RS23955	WP_011427844.1	256	COG1028	IQR	L-iditol 2-dehydrogenase	4593
RHE_RS20315	R	RHE_RS27560_m2	R	-148	-131	AAATAAATGTTATAATTA	8.8	7.7e-06	-11774	5114		RHE_RS26425																								RHE_RS23935	1	228241	229101	D	24302062	-	RHE_RS23935	WP_011427840.1	286	COG0169	E	shikimate dehydrogenase	4589
RHE_RS27555	R	RHE_RS27560_m2	R	-287	-270	TGCTAATATTAATTACCT	16.5	6.0e-09	-18932	8222		RHE_RS26435																								RHE_RS23630	1	168588	169973	R	24302123	-	RHE_RS23630	WP_011427783.1	461	COG4564	T	histidine kinase	4527
RHE_RS27555	R	RHE_RS27560_m2	R	-164	-147	TAGTAAATAGTATTATCA	14.3	7.4e-08	-16419	7131		RHE_RS26440																								RHE_RS23350	1	106295	107344	R	24302179	-	RHE_RS23350	WP_042119731.1	349	COG1609	K	LacI family transcriptional regulator	4473
RHE_RS27555	R	RHE_RS27560_m2	R	-151	-134	CAAGAATCTTAATTAGTA	12.2	5.4e-07	-14432	6268		RHE_RS26445																								RHE_RS23325	1	102240	102866	D	24302184	-	RHE_RS23325	WP_011427722.1	208	COG4566	TK	DNA-binding response regulator	4469
RHE_RS27560	D	RHE_RS27560_m2	D	-197	-180	CAAGAATCTTAATTAGTA	12.2	5.4e-07	-14432	6268		RHE_RS26465																								RHE_RS23185	1	67147	67914	D	24302212	-	RHE_RS23185	WP_011427694.1	255	COG1028	IQR	3-hydroxyacyl-CoA dehydrogenase	4438
RHE_RS27560	D	RHE_RS27560_m2	D	-184	-167	TAGTAAATAGTATTATCA	14.3	7.4e-08	-16419	7131		RHE_RS26495																								RHE_RS23180	1	65986	67062	R	24302213	-	RHE_RS23180	WP_011427693.1	358	COG2207	K	AraC family transcriptional regulator	4437
RHE_RS27560	D	RHE_RS27560_m2	D	-61	-44	TGCTAATATTAATTACCT	16.5	6.0e-09	-18932	8222		RHE_RS26575																								RHE_RS23015	1	29676	30476	D	24302246	-	RHE_RS23015	WP_042119783.1	266	COG3221	P	phosphate ABC transporter substrate-binding protein	4405
RHE_RS28770	R	RHE_RS27560_m2	R	-36	-19	TGCTAATCGAGAGTACCC	8.7	8.8e-06	-11641	5056		RHE_RS26610																								RHE_RS22940	1	14432	15220	R	24302261	tauB	RHE_RS22940	WP_011427645.1	262	COG4525	P	MULTISPECIES: taurine import ATP-binding protein TauB	4390
RHE_RS00185	R	RHE_RS27560_m3	R	-231	-203	TCGATTAATTATTTGATATTACTATATTT	7.3	3.6e-06	-12535	5444		RHE_RS26635																								RHE_RS22845	1	183046	184338	D	24301873	-	RHE_RS22845	WP_011427627.1	430	COG1414	K	replication initiation protein	4373
RHE_RS00190	D	RHE_RS27560_m3	D	-122	-94	TCGATTAATTATTTGATATTACTATATTT	7.3	3.6e-06	-12535	5444		RHE_RS26680																								RHE_RS22830	1	179736	180188	D	24301876	-	RHE_RS22830	WP_042119690.1	150	COG1396	K	transcriptional regulator	4370
RHE_RS08760	D	RHE_RS27560_m3	D	-51	-23	GCTGTATAAGATTTGTTATTATTGAAACC	9.0	1.3e-06	-13553	5886		RHE_RS26695																								RHE_RS22770	1	167203	168123	D	24301888	-	RHE_RS22770	WP_041678940.1	306	COG2169	L	AraC family transcriptional regulator	4358
RHE_RS14185	R	RHE_RS27560_m3	R	-100	-72	AGTAATTAAGGATATCTTTTATCCATAAG	7.1	4.0e-06	-12429	5398		RHE_RS26720																								RHE_RS22570	1	123539	124372	R	24301928	-	RHE_RS22570	WP_011427575.1	277	COG0483	G	MULTISPECIES: inositol monophosphatase	4319
RHE_RS16350	D	RHE_RS27560_m3	D	-122	-94	ATGGATTAATAATTAAGATTAATAAGCGA	6.8	5.0e-06	-12206	5301		RHE_RS26730																								RHE_RS22190	1	41536	42300	D	24302004	-	RHE_RS22190	WP_011427504.1	254	COG2186	K	MULTISPECIES: FadR family transcriptional regulator	4248
RHE_RS16530	D	RHE_RS27560_m3	D	-208	-180	GACGATCACTAATTGTTAAAACTATAATA	8.8	1.6e-06	-13346	5796		RHE_RS26765																								RHE_RS21400	1	66261	68216	D	24301812	-	RHE_RS21400	WP_011427365.1	651			MULTISPECIES: virulence VirE3 protein	4116
RHE_RS17200	R	RHE_RS27560_m3	R	-106	-78	CAAAATAGCTAATATTTATAGCTTGTATC	5.6	9.0e-06	-11618	5046		RHE_RS26790																								RHE_RS21225	1	28301	29026	D	24301847	-	RHE_RS21225	WP_086005040.1	241	COG4221	C	MULTISPECIES: SDR family NAD(P)-dependent oxidoreductase	4090
RHE_RS27555	R	RHE_RS27560_m3	R	-292	-264	GACGAATGCTAATATTAATTACCTAACAC	20.4	1.4e-10	-22689	9854		RHE_RS26795																								RHE_RS21130	1	6480	7640	D	24301866	-	RHE_RS21130	WP_011427311.1	386	COG3904	S	MULTISPECIES: hypothetical protein	4074
RHE_RS27555	R	RHE_RS27560_m3	R	-169	-141	CTTAATTAGTAAATAGTATTATCAATGCA	7.3	3.8e-06	-12481	5420		RHE_RS26800																								RHE_RS21080	1	4377208	4378521	R	24301218	-	RHE_RS21080	WP_042119137.1	437	COG0486	J	tRNA uridine-5-carboxymethylaminomethyl(34) synthesis GTPase MnmE	4064
RHE_RS27555	R	RHE_RS27560_m3	R	-156	-128	GGTATACAAGAATCTTAATTAGTAAATAG	21.2	5.4e-11	-23642	10268		RHE_RS26840																								RHE_RS21075	1	4375239	4377137	R	24301337	-	RHE_RS21075	WP_011427302.1	632	COG0445	J	tRNA uridine-5-carboxymethylaminomethyl(34) synthesis enzyme MnmG	4063
RHE_RS27560	D	RHE_RS27560_m3	D	-203	-175	GGTATACAAGAATCTTAATTAGTAAATAG	21.2	5.4e-11	-23642	10268		RHE_RS26850																								RHE_RS20895	1	4331652	4332557	R	24298267	-	RHE_RS20895	WP_011427269.1	301	COG2301	G	CoA ester lyase	4029
RHE_RS27560	D	RHE_RS27560_m3	D	-190	-162	CTTAATTAGTAAATAGTATTATCAATGCA	7.3	3.8e-06	-12481	5420		RHE_RS26865																								RHE_RS20825	1	4317621	4317998	R	24299475	-	RHE_RS20825	WP_011427257.1	125	COG2005	K	LysR family transcriptional regulator	4017
RHE_RS27560	D	RHE_RS27560_m3	D	-67	-39	GACGAATGCTAATATTAATTACCTAACAC	20.4	1.4e-10	-22689	9854		RHE_RS26875																								RHE_RS20790	1	4310199	4311290	D	24299839	obgE	RHE_RS20790	WP_011427250.1	363	COG0536	DL	GTPase ObgE	4010
RHE_RS00990	R	RHE_RS27560_m4	R	-69	-50	TGCTAATATCGATAACAAAA	9.7	9.9e-07	-13826	6004		RHE_RS26890																								RHE_RS20775	1	4307913	4308569	D	24299894	-	RHE_RS20775	WP_011427247.1	218	COG1670	JO	MULTISPECIES: N-acetyltransferase	4007
RHE_RS01035	D	RHE_RS27560_m4	D	-63	-44	TAATTATACCAATTCCTGAG	6.5	6.3e-06	-11975	5201		RHE_RS26920																								RHE_RS20735	1	4300495	4302162	D	24300128	-	RHE_RS20735	WP_011427243.1	555	COG1178	P	iron ABC transporter permease	4000
RHE_RS16350	D	RHE_RS27560_m4	D	-116	-97	TAATAATTAAGATTAATAAG	10.9	4.6e-07	-14592	6337		RHE_RS26945																								RHE_RS20695	1	4288883	4292194	D	24300204	-	RHE_RS20695	WP_042119111.1	1103	COG1073	T	membrane protein	3992
RHE_RS16530	D	RHE_RS27560_m4	D	-202	-183	CACTAATTGTTAAAACTATA	6.7	5.9e-06	-12041	5229		RHE_RS26950																								RHE_RS20690	1	4287616	4288794	D	24298419	-	RHE_RS20690	WP_011427234.1	392	COG0438	M	glycosyl transferase	3991
RHE_RS17200	R	RHE_RS27560_m4	R	-103	-84	AGCTAATATTTATAGCTTGT	11.0	4.3e-07	-14659	6367		RHE_RS27050																								RHE_RS19890	1	4119418	4122402	R	24299485	-	RHE_RS19890	WP_011427083.1	994	COG0567	C	2-oxoglutarate dehydrogenase E1 component	3829
RHE_RS27555	R	RHE_RS27560_m4	R	-289	-270	TGCTAATATTAATTACCTAA	21.7	2.5e-11	-24412	10602		RHE_RS27070																								RHE_RS19725	1	4085439	4086263	R	24298920	-	RHE_RS19725	WP_011427051.1	274	COG1526	C	formate dehydrogenase accessory sulfurtransferase FdhD	3796
RHE_RS27555	R	RHE_RS27560_m4	R	-153	-134	CAAGAATCTTAATTAGTAAA	5.9	9.1e-06	-11607	5041		RHE_RS27150																								RHE_RS19235	1	3989731	3990507	R	24299092	-	RHE_RS19235	WP_011426964.1	258	COG1040	R	ComF family protein	3701
RHE_RS27560	D	RHE_RS27560_m4	D	-197	-178	CAAGAATCTTAATTAGTAAA	5.9	9.1e-06	-11607	5041		RHE_RS27185																								RHE_RS19050	1	3949029	3949379	D	24300437	-	RHE_RS19050	WP_011426935.1	116	COG4321	R	hypothetical protein	3670
RHE_RS27560	D	RHE_RS27560_m4	D	-61	-42	TGCTAATATTAATTACCTAA	21.7	2.5e-11	-24412	10602		RHE_RS27195																								RHE_RS18860	1	3907606	3908745	R	24300612	-	RHE_RS18860	WP_011426900.1	379	COG0845	MV	efflux RND transporter periplasmic adaptor subunit	3633
RHE_RS11740	R	RHE_RS27560_m5	R	-150	-112	AAAAACTATTTTATGATGTAATTACAATACGTTAAATCA	5.7	5.2e-06	-12167	5284		RHE_RS27240																								RHE_RS18835	1	3899120	3900073	R	24300884	-	RHE_RS18835	WP_011426895.1	317	COG2390	K	sugar-binding transcriptional regulator	3628
RHE_RS13025	R	RHE_RS27560_m5	R	-104	-66	GCGTAAAGTTTTATTAGAACATAGTTAAATAATGTAGGG	9.8	4.3e-07	-14659	6367		RHE_RS27280																								RHE_RS18745	1	3882321	3882764	R	24301460	-	RHE_RS18745	WP_011426878.1	147	COG2259	S	DoxX family protein	3610
RHE_RS15875	D	RHE_RS27560_m5	D	-384	-346	TAGCATGGTGCTCATAGTTTATGCAAATTGCACAAAATA	6.5	3.3e-06	-12622	5481		RHE_RS27310																								RHE_RS18685	1	3869325	3870161	D	24298132	-	RHE_RS18685	WP_011426867.1	278	COG2207	K	AraC family transcriptional regulator	3598
RHE_RS16200	R	RHE_RS27560_m5	R	-250	-212	CAATTTTGGTATATCGTTAAAAAGTATTACTTTTGATGG	5.0	7.7e-06	-11774	5114		RHE_RS27415																								RHE_RS18180	1	3747182	3748213	D	24300173	-	RHE_RS18180	WP_011426775.1	343	COG0330	O	MULTISPECIES: SPFH/Band 7/PHB domain protein	3498
RHE_RS16200	R	RHE_RS27560_m5	R	-205	-167	TGGATTCCTATAACTGTCAAATAGAATAAGTGGTAATGT	7.3	2.2e-06	-13027	5658		RHE_RS27460																								RHE_RS18160	1	3741598	3743049	D	24298541	-	RHE_RS18160	WP_011426771.1	483	COG5310	Q	homospermidine synthase	3494
RHE_RS16205	D	RHE_RS27560_m5	D	-109	-71	TGGATTCCTATAACTGTCAAATAGAATAAGTGGTAATGT	7.3	2.2e-06	-13027	5658		RHE_RS27520																								RHE_RS18125	1	3733100	3733363	D	24298395	-	RHE_RS18125	WP_008533181.1	87	COG3750	S	MULTISPECIES: DUF2312 domain-containing protein	3487
RHE_RS16205	D	RHE_RS27560_m5	D	-64	-26	CAATTTTGGTATATCGTTAAAAAGTATTACTTTTGATGG	5.0	7.7e-06	-11774	5114		RHE_RS27525																								RHE_RS18035	1	3719211	3719471	D	24301547	-	RHE_RS18035	WP_011426750.1	86	COG0640	K	ArsR family transcriptional regulator	3469
RHE_RS16530	D	RHE_RS27560_m5	D	-210	-172	TAGACGATCACTAATTGTTAAAACTATAATATTTAAGAC	5.5	5.8e-06	-12058	5237		RHE_RS27555																								RHE_RS17085	1	3503305	3504330	D	24301375	-	RHE_RS17085	WP_042118958.1	341	COG0564	J	RluA family pseudouridine synthase	3288
RHE_RS16700	R	RHE_RS27560_m5	R	-99	-61	TTAAACTTGATTTTTAGAGTAAAGTATAAAGTAGACTGT	8.0	1.3e-06	-13553	5886		RHE_RS27560																								RHE_RS17055	1	3498861	3499223	R	24300688	-	RHE_RS17055	WP_011426567.1	120	COG0745	TK	MULTISPECIES: response regulator	3282
RHE_RS17045	R	RHE_RS27560_m5	R	-322	-284	CAGAGAAATGGAAAAATTATTTAATAAATTCGATACTCC	8.9	7.6e-07	-14090	6119		RHE_RS27570																								RHE_RS17010	1	3491686	3492588	R	24298926	-	RHE_RS17010	WP_011426559.1	300	COG0559	E	branched-chain amino acid ABC transporter permease	3273
RHE_RS17050	D	RHE_RS27560_m5	D	-158	-120	CAGAGAAATGGAAAAATTATTTAATAAATTCGATACTCC	8.9	7.6e-07	-14090	6119		RHE_RS27600																								RHE_RS16800	1	3447193	3448194	R	24299517	-	RHE_RS16800	WP_042118941.1	333	COG4977	K	transcriptional regulator FtrA	3232
RHE_RS17135	D	RHE_RS27560_m5	D	-109	-71	TACAAAAAAGATATTGTTATTCAGCACAAGGAATAAGAA	4.6	9.6e-06	-11554	5018		RHE_RS27645																								RHE_RS16735	1	3434110	3434904	D	24298213	-	RHE_RS16735	WP_011426505.1	264	COG4559	P	hemin import ATP-binding protein HmuV	3220
RHE_RS27555	R	RHE_RS27560_m5	R	-171	-133	ACAAGAATCTTAATTAGTAAATAGTATTATCAATGCACA	26.9	1.1e-13	-29838	12959		RHE_RS27660																								RHE_RS15950	1	3266883	3267350	R	24299173	-	RHE_RS15950	WP_011426355.1	155	COG3832	S	activator of HSP90 ATPase	3067
RHE_RS27555	R	RHE_RS27560_m5	R	-164	-126	ACGGTATACAAGAATCTTAATTAGTAAATAGTATTATCA	7.9	1.4e-06	-13479	5854		RHE_RS27690																								RHE_RS15585	1	3188472	3188735	D	24297882	-	RHE_RS15585	WP_011426287.1	87			hypothetical protein	3000
RHE_RS27560	D	RHE_RS27560_m5	D	-205	-167	ACGGTATACAAGAATCTTAATTAGTAAATAGTATTATCA	7.9	1.4e-06	-13479	5854		RHE_RS27745																								RHE_RS15385	1	3148936	3149808	R	24298240	-	RHE_RS15385	WP_011426248.1	290	COG4221	C	KR domain-containing protein	2961
RHE_RS27560	D	RHE_RS27560_m5	D	-198	-160	ACAAGAATCTTAATTAGTAAATAGTATTATCAATGCACA	26.9	1.1e-13	-29838	12959		RHE_RS27750																								RHE_RS15190	1	3108917	3109975	D	24299306	-	RHE_RS15190	WP_041678711.1	352	COG0438	M	glycosyltransferase family 1 protein	2925
RHE_RS28510	R	RHE_RS27560_m5	R	-125	-87	ACAATCAGTATTCATAGAAAACACAATTTTCTCGACGCC	7.6	1.7e-06	-13285	5770		RHE_RS27810																								RHE_RS15070	1	3073946	3074740	R	24300822	-	RHE_RS15070	WP_011426189.1	264	COG2207	K	AraC family transcriptional regulator	2901
RHE_RS28775	R	RHE_RS27560_m5	R	-90	-52	CGGATTCGATAATTTAGTATTAACTAAACGAGGAGAGTC	6.6	3.3e-06	-12622	5481		RHE_RS27845																								RHE_RS14720	1	3010153	3010497	R	24298934	-	RHE_RS14720	WP_011426124.1	114	COG0251	V	RidA family protein	2832
RHE_RS16660	R	RHE_RS27525_m1	R	-68	-51	ATTCAAAGCGCTTTGGAA	9.2	2.7e-06	-12822	5569		RHE_RS27875																								RHE_RS14710	1	3007255	3008457	D	24300356	-	RHE_RS14710	WP_042118770.1	400	COG1804	I	CoA transferase	2830
RHE_RS18970	D	RHE_RS27525_m1	D	-82	-65	ATTTAAAACGTTTTCATT	11.4	7.0e-07	-14172	6155		RHE_RS27915																								RHE_RS14640	1	2991497	2992132	D	24299454	-	RHE_RS14640	WP_011426108.1	211	COG1280	E	LysE family translocator	2816
RHE_RS27520	R	RHE_RS27525_m1	R	-195	-178	ATTGAAATCGATTTCAAT	14.3	8.4e-08	-16292	7076		RHE_RS27920																								RHE_RS14615	1	2986183	2987370	R	24299601	-	RHE_RS14615	WP_042118765.1	395	COG0665	E	FAD-dependent oxidoreductase	2811
RHE_RS27520	R	RHE_RS27525_m1	R	-35	-18	ATTGAAATCGATTTGGAC	13.5	1.6e-07	-15648	6796		RHE_RS27925																								RHE_RS14315	1	2913532	2914326	R	24298364	-	RHE_RS14315	WP_011426045.1	264	COG0207	F	thymidylate synthase	2754
RHE_RS27525	D	RHE_RS27525_m1	D	-258	-241	ATTGAAATCGATTTGGAC	13.5	1.6e-07	-15648	6796		RHE_RS27930																								RHE_RS14100	1	2868014	2869018	D	24298805	-	RHE_RS14100	WP_011426001.1	334	COG2390	K	sugar-binding transcriptional regulator	2712
RHE_RS27525	D	RHE_RS27525_m1	D	-98	-81	ATTGAAATCGATTTCAAT	14.3	8.4e-08	-16292	7076		RHE_RS27935																								RHE_RS13345	1	2718743	2720230	R	24300226	-	RHE_RS13345	WP_011425856.1	495	COG5434	G	right-handed parallel beta-helix repeat-containing protein	2569
RHE_RS00765	R	RHE_RS27525_m2	R	-338	-315	TTACAAATCGGTAACAGTTTGGTG	4.0	7.7e-06	-11774	5114		RHE_RS27970																								RHE_RS13180	1	2688116	2688787	R	24300930	-	RHE_RS13180	WP_011425829.1	223	COG0745	TK	DNA-binding response regulator	2542
RHE_RS07140	D	RHE_RS27525_m2	D	-334	-311	GAAACCATTGAAATCGATTTTTAT	6.5	2.7e-06	-12822	5569		RHE_RS28005																								RHE_RS13170	1	2685793	2686665	R	24300086	-	RHE_RS13170	WP_011425827.1	290			DUF3313 domain-containing protein	2540
RHE_RS10545	R	RHE_RS27525_m2	R	-69	-46	TTGCAAATCGAATTCGACTTCGAT	5.7	3.7e-06	-12507	5432		RHE_RS28010																								RHE_RS13060	1	2665159	2666082	D	24301044	-	RHE_RS13060	WP_011425806.1	307	COG0583	K	LysR family transcriptional regulator	2518
RHE_RS10550	D	RHE_RS27525_m2	D	-90	-67	TTGCAAATCGAATTCGACTTCGAT	5.7	3.7e-06	-12507	5432		RHE_RS28020																								RHE_RS13050	1	2663225	2664025	R	24301302	-	RHE_RS13050	WP_011425804.1	266	COG2226	H	class I SAM-dependent methyltransferase	2516
RHE_RS13025	R	RHE_RS27525_m2	R	-155	-132	ACTGAAATCGAATGAGATTTCAGC	4.1	7.4e-06	-11814	5131		RHE_RS28025																								RHE_RS12965	1	2644647	2644913	R	24300254	-	RHE_RS12965	WP_011425789.1	88			hypothetical protein	2501
RHE_RS16660	R	RHE_RS27525_m2	R	-68	-45	AGCAGAATTCAAAGCGCTTTGGAA	13.2	7.4e-08	-16419	7131		RHE_RS28045																								RHE_RS12520	1	2558832	2559767	D	24298668	-	RHE_RS12520	WP_011425705.1	311	COG0583	K	LysR family transcriptional regulator	2416
RHE_RS18970	D	RHE_RS27525_m2	D	-88	-65	GTTAAAATTTAAAACGTTTTCATT	12.1	1.4e-07	-15782	6854		RHE_RS28070																								RHE_RS12490	1	2554363	2555145	D	24298417	-	RHE_RS12490	WP_011425700.1	260	COG0368	H	adenosylcobinamide-GDP ribazoletransferase	2411
RHE_RS27520	R	RHE_RS27525_m2	R	-195	-172	GACTTAATTGAAATCGATTTCAAT	16.6	6.9e-09	-18792	8161		RHE_RS28140																								RHE_RS12355	1	2533176	2533982	D	24300455	-	RHE_RS12355	WP_011425676.1	268	COG4215	E	MULTISPECIES: ABC transporter permease	2386
RHE_RS27520	R	RHE_RS27525_m2	R	-35	-12	CCAGAAATTGAAATCGATTTGGAC	17.2	4.1e-09	-19312	8387		RHE_RS28220																								RHE_RS12325	1	2524728	2525468	R	24299427	-	RHE_RS12325	WP_011425670.1	246	COG0745	TK	DNA-binding response regulator	2380
RHE_RS27525	D	RHE_RS27525_m2	D	-264	-241	CCAGAAATTGAAATCGATTTGGAC	17.2	4.1e-09	-19312	8387		RHE_RS28225																								RHE_RS12185	1	2495717	2497324	D	24297865	-	RHE_RS12185	WP_020921459.1	535	COG1838	C	fumarate hydratase	2356
RHE_RS27525	D	RHE_RS27525_m2	D	-104	-81	GACTTAATTGAAATCGATTTCAAT	16.6	6.9e-09	-18792	8161		RHE_RS28305																								RHE_RS12035	1	2463809	2464102	R	24297700	-	RHE_RS12035	WP_011425615.1	97	COG1737	K	MurR/RpiR family transcriptional regulator	2326
RHE_RS30095	D	RHE_RS27525_m2	D	-54	-31	CTCATGCTTGAATACCGTTTCGGG	3.6	9.5e-06	-11564	5022		RHE_RS28340																								RHE_RS11855	1	2417955	2418581	D	24300368	-	RHE_RS11855	WP_011425580.1	208	COG0625	O	glutathione S-transferase family protein	2292
RHE_RS04720	D	RHE_RS27525_m3	D	-265	-240	GGCAAAAGCCTTTCTTTGCGTCAAAC	2.4	6.9e-06	-11884	5161		RHE_RS28350																								RHE_RS11815	1	2409174	2409791	R	24300445	-	RHE_RS11815	WP_011425572.1	205	COG0522	J	MULTISPECIES: 30S ribosomal protein S4	2284
RHE_RS06325	D	RHE_RS27525_m3	D	-116	-91	GGCAGACCTCGTGCGGTCTGTCACGA	2.1	7.8e-06	-11761	5108		RHE_RS28370																								RHE_RS11690	1	2388570	2388803	D	24298815	-	RHE_RS11690	WP_011425547.1	77	COG0271	T	MULTISPECIES: BolA family transcriptional regulator	2259
RHE_RS13740	D	RHE_RS27525_m3	D	-285	-260	TGAAAACAAAGGGGTTTCTGTCAAGC	2.6	6.3e-06	-11975	5201		RHE_RS28420																								RHE_RS11665	1	2383272	2383670	D	24297721	-	RHE_RS11665	WP_011425542.1	132			hypothetical protein	2254
RHE_RS14830	R	RHE_RS27525_m3	R	-67	-42	CACATAAAGATATCTTTATGTCAATA	5.3	1.8e-06	-13228	5745		RHE_RS28425																								RHE_RS11555	1	2361635	2365033	R	24301292	-	RHE_RS11555	WP_011425521.1	1132	COG3164	S	membrane protein	2233
RHE_RS18760	D	RHE_RS27525_m3	D	-358	-333	GACAGACCGCCTGCATTCAGTGAACA	2.7	6.0e-06	-12024	5222		RHE_RS28445																								RHE_RS11465	1	2342218	2342580	D	24299166	gcvH	RHE_RS11465	WP_011425503.1	120	COG0509	E	glycine cleavage system protein H	2215
RHE_RS27520	R	RHE_RS27525_m3	R	-71	-46	TGCAGAAGGCTTGAAGGGCGTCAAGC	9.3	2.5e-07	-15202	6602		RHE_RS28450																								RHE_RS11205	1	2298323	2298742	D	24297493	-	RHE_RS11205	WP_011425453.1	139			hypothetical protein	2164
RHE_RS27525	D	RHE_RS27525_m3	D	-230	-205	TGCAGAAGGCTTGAAGGGCGTCAAGC	9.3	2.5e-07	-15202	6602		RHE_RS28455																								RHE_RS11200	1	2297734	2298192	R	24299018	-	RHE_RS11200	WP_011425452.1	152	COG0456	J	N-acetyltransferase	2163
RHE_RS12060	R	RHE_RS27525_m4	R	-65	-45	CGATTGCTACCGGGTGCAAAA	10.2	4.9e-06	-12226	5310		RHE_RS28510																								RHE_RS11085	1	2272299	2272523	D	24300197	-	RHE_RS11085	WP_010035073.1	74	COG2824	K	MULTISPECIES: alkylphosphonate utilization protein	2141
RHE_RS20095	R	RHE_RS27525_m4	R	-88	-68	GAATTGTAGCGAAGATCAAAC	10.4	3.8e-06	-12481	5420		RHE_RS28545																								RHE_RS10805	1	2210346	2213171	D	24298811	-	RHE_RS10805	WP_011425376.1	941	COG0188	L	DNA gyrase subunit A	2087
RHE_RS27520	R	RHE_RS27525_m4	R	-196	-176	TAATTGAAATCGATTTCAATT	10.9	2.0e-06	-13122	5699		RHE_RS28550																								RHE_RS10800	1	2209461	2210108	R	24297587	-	RHE_RS10800	WP_011425375.1	215	COG2095	E	MarC family protein	2086
RHE_RS27525	D	RHE_RS27525_m4	D	-100	-80	TAATTGAAATCGATTTCAATT	10.9	2.0e-06	-13122	5699		RHE_RS28555																								RHE_RS10745	1	2196504	2197175	R	24300031	-	RHE_RS10745	WP_011425366.1	223	COG2761	O	DsbA family oxidoreductase	2074
RHE_RS29630	D	RHE_RS27525_m4	D	-160	-140	ACATGGATCACTAGGTCAAAT	9.6	9.8e-06	-11533	5009		RHE_RS28625																								RHE_RS10735	1	2195456	2195923	D	24298598	-	RHE_RS10735	WP_011425364.1	155	COG1764	V	peroxiredoxin	2073
RHE_RS04720	D	RHE_RS27525_m5	D	-265	-240	GGCAAAAGCCTTTCTTTGCGTCAAAC	2.4	6.9e-06	-11884	5161		RHE_RS28650																								RHE_RS10725	1	2191634	2191939	D	24298117	-	RHE_RS10725	WP_042118458.1	101	COG2938	O	succinate dehydrogenase assembly factor 2 family protein	2071
RHE_RS06325	D	RHE_RS27525_m5	D	-116	-91	GGCAGACCTCGTGCGGTCTGTCACGA	2.1	7.8e-06	-11761	5108		RHE_RS28655																								RHE_RS10265	1	2093047	2094999	D	24298469	-	RHE_RS10265	WP_011425276.1	650	COG1475	D	ParB/RepB/Spo0J family partition protein	1978
RHE_RS13740	D	RHE_RS27525_m5	D	-285	-260	TGAAAACAAAGGGGTTTCTGTCAAGC	2.6	6.3e-06	-11975	5201		RHE_RS28665																								RHE_RS09860	1	2014782	2016056	D	24301665	-	RHE_RS09860	WP_004678645.1	424	COG0148	G	MULTISPECIES: enolase	1898
RHE_RS14830	R	RHE_RS27525_m5	R	-67	-42	CACATAAAGATATCTTTATGTCAATA	5.3	1.8e-06	-13228	5745		RHE_RS28695																								RHE_RS09785	1	1997659	1998219	D	24299946	-	RHE_RS09785	WP_004678618.1	186	COG0233	J	MULTISPECIES: ribosome-recycling factor	1883
RHE_RS18760	D	RHE_RS27525_m5	D	-358	-333	GACAGACCGCCTGCATTCAGTGAACA	2.7	6.0e-06	-12024	5222		RHE_RS28710																								RHE_RS09690	1	1978966	1980168	R	24299491	-	RHE_RS09690	WP_042118350.1	400	COG4597	E	amino acid ABC transporter permease	1864
RHE_RS27520	R	RHE_RS27525_m5	R	-71	-46	TGCAGAAGGCTTGAAGGGCGTCAAGC	9.3	2.5e-07	-15202	6602		RHE_RS28725																								RHE_RS09605	1	1964131	1965933	D	24300233	recJ	RHE_RS09605	WP_011425166.1	600	COG0608	L	single-stranded-DNA-specific exonuclease RecJ	1851
RHE_RS27525	D	RHE_RS27525_m5	D	-230	-205	TGCAGAAGGCTTGAAGGGCGTCAAGC	9.3	2.5e-07	-15202	6602		RHE_RS28770																								RHE_RS09405	1	1928787	1930271	D	24298502	-	RHE_RS09405	WP_011425130.1	494	COG0544	O	trigger factor	1814
RHE_RS14175	D	RHE_RS27470_m1	D	-186	-170	GAGATTATTTTTAGCAC	10.8	3.0e-06	-12717	5523		RHE_RS28775																								RHE_RS09290	1	1902373	1903590	D	24298063	-	RHE_RS09290	WP_011425107.1	405	COG0232	F	deoxyguanosinetriphosphate triphosphohydrolase	1790
RHE_RS19180	D	RHE_RS27470_m1	D	-180	-164	ATGATCACAATCTGCTG	12.3	5.3e-07	-14450	6276		RHE_RS28780																								RHE_RS08675	1	1778162	1779502	D	24300033	-	RHE_RS08675	WP_011424990.1	446	COG0201	U	preprotein translocase subunit SecY	1671
RHE_RS30795	R	RHE_RS27470_m1	R	-147	-131	ATGATTATCTTCAGAGC	9.8	7.8e-06	-11761	5108		RHE_RS28850																								RHE_RS08410	1	1730305	1731963	D	24301420	-	RHE_RS08410	WP_011424958.1	552	COG1960	I	acyl-CoA dehydrogenase	1622
RHE_RS14720	R	RHE_RS27470_m2	R	-62	-53	AAATCAGCGC	10.3	6.7e-06	-11913	5174		RHE_RS28855																								RHE_RS08405	1	1729170	1730126	R	24301421	-	RHE_RS08405	WP_011424957.1	318	COG0540	F	aspartate carbamoyltransferase	1621
RHE_RS26635	D	RHE_RS27470_m3	D	-107	-97	AACTGTTGAAA	9.9	4.8e-06	-12247	5319		RHE_RS28865																								RHE_RS08260	1	1694459	1694767	D	24299599	-	RHE_RS08260	WP_010066755.1	102	COG0713	C	MULTISPECIES: NADH-quinone oxidoreductase subunit K 1	1592
RHE_RS27415	D	RHE_RS27470_m3	D	-95	-85	CACTGCTGAAA	14.6	2.0e-07	-15425	6699		RHE_RS28885																								RHE_RS08205	1	1684036	1684638	D	24300339	-	RHE_RS08205	WP_011424923.1	200	COG0852	C	NADH-quinone oxidoreductase subunit C	1581
RHE_RS28780	D	RHE_RS27470_m3	D	-248	-238	CACTTCTGAAA	9.6	5.8e-06	-12058	5237		RHE_RS28890																								RHE_RS08090	1	1662765	1663076	D	24300811	-	RHE_RS08090	WP_011424909.1	103			DUF982 domain-containing protein	1563
RHE_RS00670	D	RHE_RS27470_m5	D	-120	-107	CTGATTTCCAGCTC	8.5	7.2e-06	-11841	5143		RHE_RS28950																								RHE_RS08085	1	1662108	1662485	D	24298491	-	RHE_RS08085	WP_011424908.1	125			glyoxalase	1562
RHE_RS27460	R	RHE_RS27460_m1	R	-308	-295	GACATAGGAAGAAA	12.8	2.5e-07	-15202	6602		RHE_RS28975																								RHE_RS07830	1	1612598	1613140	D	24301051	-	RHE_RS07830	WP_011424865.1	180	COG0789	K	MULTISPECIES: MerR family transcriptional regulator	1516
RHE_RS27460	R	RHE_RS27460_m1	R	-189	-176	TGCGGAGGAAGAGC	10.1	6.7e-06	-11913	5174		RHE_RS29045																								RHE_RS07750	1	1597459	1598652	R	24298217	-	RHE_RS07750	WP_011424850.1	397	COG0027	F	ATP-grasp domain-containing protein	1500
RHE_RS27460	R	RHE_RS27460_m1	R	-80	-67	TCCATAGGAAGCCG	10.7	4.0e-06	-12429	5398		RHE_RS29075																								RHE_RS07595	1	1560972	1562096	D	24298954	-	RHE_RS07595	WP_011424822.1	374	COG0628	R	AI-2E family transporter	1470
RHE_RS00575	R	RHE_RS27460_m2	R	-122	-100	CTGCCTATAAACCAAATAAGCAG	9.9	1.6e-06	-13346	5796		RHE_RS29080																								RHE_RS07590	1	1559655	1560728	R	24298955	-	RHE_RS07590	WP_011424821.1	357	COG0150	F	phosphoribosylformylglycinamidine cyclo-ligase	1469
RHE_RS27460	R	RHE_RS27460_m2	R	-308	-286	CTTCCTTCGGACATAGGAAGAAA	16.0	1.4e-08	-18084	7854		RHE_RS29085																								RHE_RS07380	1	1516463	1517680	D	24301179	-	RHE_RS07380	WP_042119221.1	405	COG1559	D	endolytic transglycosylase MltG	1426
RHE_RS01360	D	RHE_RS27460_m3	D	-33	-7	ATCCTGCCGCCGATGGGGAGGAAGAAA	9.2	3.7e-06	-12507	5432		RHE_RS29125																								RHE_RS07240	1	1489754	1490668	R	24300924	rarD	RHE_RS07240	WP_011424753.1	304	COG2962	S	EamA family transporter RarD	1397
RHE_RS20320	R	RHE_RS27460_m3	R	-31	-5	TGTATGCCTCCCGGCGGTAGGAAGTGA	8.0	8.4e-06	-11687	5076		RHE_RS29140																								RHE_RS06860	1	1398576	1399493	R	24300495	iolE	RHE_RS06860	WP_011424679.1	305	COG1082	G	myo-inosose-2 dehydratase	1321
RHE_RS06405	D	RHE_RS27460_m4	D	-279	-269	GCAAGTAGAAT	9.9	6.9e-06	-11884	5161		RHE_RS29170																								RHE_RS06845	1	1396358	1397197	R	24298848	-	RHE_RS06845	WP_020920836.1	279	COG2169	L	AraC family transcriptional regulator	1318
RHE_RS14355	D	RHE_RS27460_m4	D	-36	-26	CCAAGTAGAAC	9.7	7.7e-06	-11774	5114		RHE_RS29195																								RHE_RS06660	1	1354978	1355871	R	24297901	-	RHE_RS06660	WP_011424641.1	297	COG1573	L	uracil-DNA glycosylase	1280
RHE_RS16700	R	RHE_RS27460_m4	R	-97	-87	TAAAGTAGACT	10.0	6.9e-06	-11884	5161		RHE_RS29200																								RHE_RS06565	1	1330204	1330509	D	24301402	-	RHE_RS06565	WP_011424622.1	101			Dabb family protein	1261
RHE_RS21085	R	RHE_RS27460_m4	R	-117	-107	CCACGTAGATG	9.8	7.3e-06	-11828	5137		RHE_RS29205																								RHE_RS06555	1	1328613	1329173	D	24301122	-	RHE_RS06555	WP_011424620.1	186	COG1309	K	TetR/AcrR family transcriptional regulator	1259
RHE_RS12490	D	RHE_RS27460_m5	D	-165	-153	GTTCCTATGAATC	11.5	1.7e-06	-13285	5770		RHE_RS29335																								RHE_RS06345	1	1292250	1292564	D	24297985	-	RHE_RS06345	WP_011424577.1	104	COG0234	O	co-chaperone GroES	1218
RHE_RS14770	D	RHE_RS27460_m5	D	-108	-96	CATCCTCTGAAAA	10.1	7.5e-06	-11801	5125		RHE_RS29380																								RHE_RS06305	1	1285953	1287119	R	24300201	-	RHE_RS06305	WP_042118137.1	388	COG0628	R	AI-2E family transporter	1210
RHE_RS14965	D	RHE_RS27460_m5	D	-166	-154	GATACTACGAAAC	11.2	2.6e-06	-12860	5585		RHE_RS29400																								RHE_RS06200	1	1261576	1262499	R	24299991	-	RHE_RS06200	WP_011424549.1	307	COG1879	G	sugar ABC transporter substrate-binding protein	1189
RHE_RS01550	R	RHE_RS27415_m1	R	-198	-184	AAATCAGTTCAAATG	16.4	3.0e-09	-19625	8523		RHE_RS29450																								RHE_RS06070	1	1236412	1236729	D	24297990	-	RHE_RS06070	WP_011424523.1	105			hypothetical protein	1162
RHE_RS19750	R	RHE_RS27415_m1	R	-46	-32	AGATCAGCACAATAG	10.5	2.8e-06	-12786	5553		RHE_RS29495																								RHE_RS05915	1	1206549	1207445	D	24298628	-	RHE_RS05915	WP_011424494.1	298	COG0583	K	LysR family transcriptional regulator	1132
RHE_RS27415	D	RHE_RS27415_m1	D	-86	-72	AAATCAGTTCAATTG	16.8	1.7e-09	-20193	8770		RHE_RS29525																								RHE_RS04535	1	948530	949774	D	24301164	-	RHE_RS04535	WP_011424248.1	414	COG4638	PR	aromatic ring-hydroxylating dioxygenase subunit alpha	869
RHE_RS27970	D	RHE_RS27415_m1	D	-148	-134	AAAACATCTCTATTG	9.7	5.4e-06	-12129	5268		RHE_RS29535																								RHE_RS04485	1	934096	936405	D	24298866	-	RHE_RS04485	WP_011424239.1	769	COG2183	K	RNA-binding transcriptional accessory protein	859
RHE_RS08150	R	RHE_RS27415_m2	R	-117	-94	AAATATCGTCAGGTTACAAAGCTT	9.3	9.4e-06	-11575	5027		RHE_RS29620																								RHE_RS04455	1	924783	926714	D	24299112	-	RHE_RS04455	WP_011424233.1	643			DUF2207 domain-containing protein	853
RHE_RS11250	R	RHE_RS27415_m2	R	-97	-74	ACACCGTGTCATCTGAGGATACTT	10.2	3.8e-06	-12481	5420		RHE_RS29630																								RHE_RS04370	1	909201	909890	R	24301597	-	RHE_RS04370	WP_011424216.1	229	COG0164	L	ribonuclease HII	836
RHE_RS11255	D	RHE_RS27415_m2	D	-241	-218	ACACCGTGTCATCTGAGGATACTT	10.2	3.8e-06	-12481	5420		RHE_RS29775																								RHE_RS04350	1	906518	907270	D	24299622	-	RHE_RS04350	WP_011424213.1	250	COG0356	C	ATP synthase subunit A	832
RHE_RS11950	R	RHE_RS27415_m2	R	-359	-336	ATCTACTCTGAAATGACATGCTTA	9.4	8.5e-06	-11675	5071		RHE_RS29840																								RHE_RS03970	1	825465	827024	D	24297539	-	RHE_RS03970	WP_042119172.1	519	COG0248	FTP	exopolyphosphatase	756
RHE_RS11955	D	RHE_RS27415_m2	D	-133	-110	ATCTACTCTGAAATGACATGCTTA	9.4	8.5e-06	-11675	5071		RHE_RS29945																								RHE_RS03890	1	807701	808561	D	24299281	-	RHE_RS03890	WP_011424128.1	286	COG2520	J	FkbM family methyltransferase	744
RHE_RS27310	R	RHE_RS27415_m2	R	-115	-92	TAGCAATTTCGATTTAGAGAACTC	9.3	9.4e-06	-11575	5027		RHE_RS29975																								RHE_RS03870	1	803743	804813	D	24299215	-	RHE_RS03870	WP_011424124.1	356	COG0392	S	UPF0104 family protein	740
RHE_RS27415	D	RHE_RS27415_m2	D	-86	-63	AAATCAGTTCAATTGACAATGCCA	12.3	4.3e-07	-14659	6367		RHE_RS30005																								RHE_RS03775	1	783013	783618	D	24299159	-	RHE_RS03775	WP_042117931.1	201	COG1595	K	RNA polymerase sigma factor	721
RHE_RS11950	R	RHE_RS27415_m3	R	-205	-175	TAACAACGAGTTAACGAGCCACAAATCTCAA	4.9	5.1e-06	-12186	5292		RHE_RS30095																								RHE_RS03615	1	739595	740692	D	24301184	-	RHE_RS03615	WP_011424077.1	365	COG0687	E	polyamine ABC transporter substrate-binding protein	693
RHE_RS11955	D	RHE_RS27415_m3	D	-294	-264	TAACAACGAGTTAACGAGCCACAAATCTCAA	4.9	5.1e-06	-12186	5292		RHE_RS30285																								RHE_RS03210	1	655974	656270	D	24300658	-	RHE_RS03210	WP_020920372.1	98	COG1396	K	XRE family transcriptional regulator	612
RHE_RS24565	R	RHE_RS27415_m3	R	-61	-31	AAAGTTTGCCTAAAATCTTCAGCATTCTCAA	5.9	3.1e-06	-12684	5509		RHE_RS30310																								RHE_RS03205	1	654122	655939	R	24300659	-	RHE_RS03205	WP_011423998.1	605	COG1226	P	Kef family K(+) transporter	611
RHE_RS27415	D	RHE_RS27415_m3	D	-98	-68	CAACACTGCTGAAAATCAGTTCAATTGACAA	23.0	9.5e-12	-25380	11022		RHE_RS30350																								RHE_RS02910	1	600510	600755	R	24300765	-	RHE_RS02910	WP_009996061.1	81			MULTISPECIES: DUF982 domain-containing protein	555
RHE_RS27415	D	RHE_RS27415_m3	D	-73	-43	TGACAATGCCAAAATGCGCTTCCATTGTCTT	25.2	4.4e-13	-28452	12357		RHE_RS30470																								RHE_RS02750	1	560258	561190	D	24301209	-	RHE_RS02750	WP_042117845.1	310	COG4976	R	methyltransferase domain-containing protein	523
RHE_RS27970	D	RHE_RS27415_m3	D	-160	-130	GAAAACTGCTCAAAAACATCTCTATTGCCTC	6.3	2.5e-06	-12899	5602		RHE_RS30570																								RHE_RS02365	1	479575	480639	D	24299274	-	RHE_RS02365	WP_011423844.1	354	COG1172	G	ABC transporter permease	450
RHE_RS00765	R	RHE_RS27415_m4	R	-55	-33	TCAAAACCGTGCCGGAGACAATG	3.9	9.2e-06	-11596	5036		RHE_RS30745																								RHE_RS02235	1	454643	456160	D	24299407	-	RHE_RS02235	WP_011423820.1	505	COG3852	T	sensor histidine kinase	427
RHE_RS01550	R	RHE_RS27415_m4	R	-204	-182	TAAAATCAGTTCAAATGCGAATG	15.2	1.2e-08	-18238	7921		RHE_RS30785																								RHE_RS02120	1	433032	433892	R	24297745	dapD	RHE_RS02120	WP_011423799.1	286	COG2171	E	2,3,4,5-tetrahydropyridine-2,6-dicarboxylate N-succinyltransferase	405
RHE_RS12670	D	RHE_RS27415_m4	D	-248	-226	CAAATCCTTTTCAAAAGCCAATG	7.6	1.4e-06	-13479	5854		RHE_RS30790																								RHE_RS02060	1	420987	421451	D	24299710	ptsN	RHE_RS02060	WP_011423788.1	154	COG1762	GT	MULTISPECIES: PTS IIA-like nitrogen-regulatory protein PtsN	393
RHE_RS18795	D	RHE_RS27415_m4	D	-78	-56	CGAAAATAGTTGCAAAGACAAAG	4.9	5.6e-06	-12093	5252		RHE_RS30795																								RHE_RS01980	1	406672	408954	R	24297888	-	RHE_RS01980	WP_011423773.1	760	COG0745	TK	hybrid sensor histidine kinase/response regulator	377
RHE_RS20655	D	RHE_RS27415_m4	D	-58	-36	TAAAATCCGGGAAATAGCCACCC	4.5	6.9e-06	-11884	5161		RHE_RS30830																								RHE_RS01845	1	377676	378311	D	24300358	-	RHE_RS01845	WP_011423749.1	211	COG0576	O	nucleotide exchange factor GrpE	350
RHE_RS27415	D	RHE_RS27415_m4	D	-88	-66	GAAAATCAGTTCAATTGACAATG	24.6	7.6e-13	-27905	12119		RHE_RS30890																								RHE_RS01545	1	313215	314504	R	24297577	-	RHE_RS01545	WP_011423689.1	429	COG0144	J	RsmB/NOP family class I SAM-dependent RNA methyltransferase	292
RHE_RS18010	R	RHE_RS27415_m5	R	-179	-164	TAACAAAGTGAAAACA	9.7	9.4e-06	-11575	5027		RHE_RS30900																								RHE_RS01480	1	299944	300798	D	24301029	-	RHE_RS01480	WP_011423676.1	284	COG2207	K	AraC family transcriptional regulator	280
RHE_RS18015	D	RHE_RS27415_m5	D	-178	-163	TAACAAAGTGAAAACA	9.7	9.4e-06	-11575	5027		RHE_RS30975																								RHE_RS01135	1	236591	239518	R	24299763	-	RHE_RS01135	WP_011423614.1	975	COG0160	E	aminotransferase	214
RHE_RS25970	R	RHE_RS27415_m5	R	-47	-32	TAACACGGCGAAAATT	12.7	2.4e-07	-15243	6620		RHE_RS31225																								RHE_RS01095	1	228427	228777	D	24299497	-	RHE_RS01095	WP_011423607.1	116	COG1846	K	MULTISPECIES: MarR family transcriptional regulator	206
RHE_RS27415	D	RHE_RS27415_m5	D	-98	-83	CAACACTGCTGAAAAT	12.3	5.1e-07	-14489	6292		RHE_RS31305																								RHE_RS01055	1	220556	222031	D	24300506	-	RHE_RS01055	WP_011423601.1	491	COG4962	UW	CpaF family protein	199
RHE_RS27415	D	RHE_RS27415_m5	D	-73	-58	TGACAATGCCAAAATG	13.6	5.0e-08	-16811	7301		RHE_RS31500																								RHE_RS01005	1	211480	212700	R	24299377	-	RHE_RS01005	WP_042117715.1	406	COG1015	G	phosphopentomutase	189
RHE_RS05255	R	RHE_RS27310_m1	R	-54	-35	TAATGCCCTAAATCGCTTGA	6.1	4.7e-06	-12268	5328		RHE_RS31670																								RHE_RS00895	1	191421	192509	D	24299020	-	RHE_RS00895	WP_011423570.1	362	COG4174	Q	microcin C ABC transporter permease YejB	169
RHE_RS05260	D	RHE_RS27310_m1	D	-53	-34	TAATGCCCTAAATCGCTTGA	6.1	4.7e-06	-12268	5328		RHE_RS32370																								RHE_RS00880	1	187657	188037	R	24299300	-	RHE_RS00880	WP_011423567.1	126	COG1803	G	methylglyoxal synthase	166
RHE_RS09835	R	RHE_RS27310_m1	R	-52	-33	AAAAGCGCCATAGGGGTTAA	5.6	6.3e-06	-11975	5201		RHE_RS32435																								RHE_RS00705	1	147023	148024	D	24298237	-	RHE_RS00705	WP_011423532.1	333	COG1052	CHR	D-glycerate dehydrogenase	131
RHE_RS21915	R	RHE_RS27310_m2	R	-165	-156	AGAGAACTCA	12.2	1.5e-06	-13410	5824		RHE_RS32555																								RHE_RS00700	1	146298	146837	R	24297996	-	RHE_RS00700	WP_011423530.1	179	COG3807	S	MULTISPECIES: hypothetical protein	130
RHE_RS27310	R	RHE_RS27310_m2	R	-116	-107	AGAGAACTCA	12.2	1.5e-06	-13410	5824		RHE_RS32675																								RHE_RS00595	1	125036	127786	R	24298524	-	RHE_RS00595	WP_011423511.1	916			translation initiation factor IF-2	109
RHE_RS27310	R	RHE_RS27310_m3	R	-130	-117	TAAGTTCTGTAATG	15.8	2.3e-08	-17588	7638		RHE_RS32710																								RHE_RS00255	1	48952	50259	D	24300298	-	RHE_RS00255	WP_011423453.1	435	COG1220	O	HslU--HslV peptidase ATPase subunit	49
RHE_RS16340	R	RHE_RS27310_m5	R	-119	-103	CGACCGCCCTGGCGATG	13.6	1.7e-07	-15587	6770		RHE_RS33140																								RHE_RS00105	1	16856	17524	D	24299903	-	RHE_RS00105	WP_011423425.1	222	COG0135	E	N-(5\'-phosphoribosyl)anthranilate isomerase	19
RHE_RS16345	D	RHE_RS27310_m5	D	-31	-15	CGACCGCCCTGGCGATG	13.6	1.7e-07	-15587	6770
RHE_RS27310	R	RHE_RS27310_m5	R	-26	-10	AGACCGCTTTGCCGAAA	13.8	1.4e-07	-15782	6854
RHE_RS04030	R	RHE_RS27280_m1	R	-111	-91	CAAGCAAAGTGAAGGACAGAC	8.8	4.8e-06	-12247	5319
RHE_RS24620	D	RHE_RS27280_m1	D	-287	-267	TATGCAATGGTCATGCCAGAA	10.2	1.8e-06	-13228	5745
RHE_RS27280	R	RHE_RS27280_m1	R	-32	-12	GAAGCAAAGCGCGTGCCAAAA	20.0	6.0e-11	-23537	10222
RHE_RS15875	D	RHE_RS27280_m2	D	-109	-91	CTGGCACGCTACGTGCTTC	8.5	8.3e-06	-11699	5081
RHE_RS16825	R	RHE_RS27280_m2	R	-273	-255	CAGGCATGCCCCTTGCATG	9.1	5.8e-06	-12058	5237
RHE_RS20095	R	RHE_RS27280_m2	R	-54	-36	TAGGAAAAGCGCATGCTTA	8.9	6.5e-06	-11944	5187
RHE_RS20575	D	RHE_RS27280_m2	D	-233	-215	GTGGCATGACGCATGCCCA	8.9	6.5e-06	-11944	5187
RHE_RS27280	R	RHE_RS27280_m2	R	-30	-12	GAAGCAAAGCGCGTGCCAA	13.2	3.4e-07	-14894	6469
RHE_RS27280	R	RHE_RS27280_m3	R	-32	-21	CGCGTGCCAAAA	13.6	1.6e-07	-15648	6796
RHE_RS06640	R	RHE_RS27280_m4	R	-112	-96	CCAAAGTTAAAGCAAAA	12.4	4.5e-07	-14614	6347
RHE_RS20930	R	RHE_RS27280_m4	R	-109	-93	AAAGACAGTCCGCAAAG	8.5	8.2e-06	-11711	5086
RHE_RS27280	R	RHE_RS27280_m4	R	-20	-4	CAAGACGGGAAGCAAAG	15.5	2.3e-08	-17588	7638
RHE_RS08430	D	RHE_RS27280_m5	D	-167	-146	ATAGCAAGGGAAAAGCCAAATG	6.1	7.5e-06	-11801	5125
RHE_RS11185	R	RHE_RS27280_m5	R	-191	-170	GATGCAAGCCCCAAGCCAGACC	8.2	2.4e-06	-12940	5620
RHE_RS11190	D	RHE_RS27280_m5	D	-53	-32	GATGCAAGCCCCAAGCCAGACC	8.2	2.4e-06	-12940	5620
RHE_RS20315	R	RHE_RS27280_m5	R	-106	-85	CATTCAAAGGACGTGCCAGATT	6.8	5.5e-06	-12111	5260
RHE_RS24620	D	RHE_RS27280_m5	D	-287	-266	TATGCAATGGTCATGCCAGAAT	12.8	1.4e-07	-15782	6854
RHE_RS24655	R	RHE_RS27280_m5	R	-218	-197	CATGCAAGAGGAGTGCCAGCTT	6.2	7.2e-06	-11841	5143
RHE_RS26070	D	RHE_RS27280_m5	D	-22	-1	GGAGCAATGCGCATGACAGGAT	9.6	1.1e-06	-13720	5959
RHE_RS27280	R	RHE_RS27280_m5	R	-33	-12	GAAGCAAAGCGCGTGCCAAAAC	21.5	3.0e-11	-24230	10523
RHE_RS03580	D	RHE_RS27240_m1	D	-191	-169	TAATATCTAATCTGACACTATTG	11.7	6.7e-08	-16519	7174
RHE_RS04570	R	RHE_RS27240_m1	R	-53	-31	CGCTGCCCGATCTGTTACTATCT	2.5	8.4e-06	-11687	5076
RHE_RS04575	D	RHE_RS27240_m1	D	-59	-37	CGCTGCCCGATCTGTTACTATCT	2.5	8.4e-06	-11687	5076
RHE_RS08760	D	RHE_RS27240_m1	D	-50	-28	CTGTATAAGATTTGTTATTATTG	2.9	6.7e-06	-11913	5174
RHE_RS20455	R	RHE_RS27240_m1	R	-302	-280	CAGCATTAAATTAGAGACTGCAT	2.7	7.3e-06	-11828	5137
RHE_RS20460	D	RHE_RS27240_m1	D	-111	-89	CAGCATTAAATTAGAGACTGCAT	2.7	7.3e-06	-11828	5137
RHE_RS26415	D	RHE_RS27240_m1	D	-54	-32	CGGCATCCTTTTGGGTGGTAGAT	4.1	3.8e-06	-12481	5420
RHE_RS27240	R	RHE_RS27240_m1	R	-27	-5	TGGTATCCTTTCTGATACTATAG	24.4	2.2e-12	-26843	11658
RHE_RS14375	R	RHE_RS27240_m2	R	-23	-8	GGACAGTCTCCGTTCA	9.8	3.9e-06	-12455	5409
RHE_RS27150	D	RHE_RS27240_m2	D	-31	-16	CAACAGTTTCCATATC	8.8	8.2e-06	-11711	5086
RHE_RS27240	R	RHE_RS27240_m2	R	-17	-2	TAATGGTATCCTTTCT	13.7	1.9e-07	-15476	6721
RHE_RS00410	R	RHE_RS27240_m4	R	-84	-62	CGGTAACTAAACGGTTACTTGAT	4.9	6.9e-06	-11884	5161
RHE_RS03580	D	RHE_RS27240_m4	D	-191	-169	TAATATCTAATCTGACACTATTG	11.1	2.2e-07	-15330	6658
RHE_RS04570	R	RHE_RS27240_m4	R	-53	-31	CGCTGCCCGATCTGTTACTATCT	5.8	4.4e-06	-12334	5357
RHE_RS04575	D	RHE_RS27240_m4	D	-59	-37	CGCTGCCCGATCTGTTACTATCT	5.8	4.4e-06	-12334	5357
RHE_RS12025	R	RHE_RS27240_m4	R	-383	-361	CATTCCCCATTTCCATACTGTCG	4.3	9.4e-06	-11575	5027
RHE_RS12030	D	RHE_RS27240_m4	D	-83	-61	CATTCCCCATTTCCATACTGTCG	4.3	9.4e-06	-11575	5027
RHE_RS12775	R	RHE_RS27240_m4	R	-97	-75	TAGTCTGCGTATCGGAACTGGAT	6.4	3.2e-06	-12652	5495
RHE_RS26415	D	RHE_RS27240_m4	D	-54	-32	CGGCATCCTTTTGGGTGGTAGAT	7.6	1.7e-06	-13285	5770
RHE_RS27240	R	RHE_RS27240_m4	R	-27	-5	TGGTATCCTTTCTGATACTATAG	24.0	1.8e-12	-27043	11745
RHE_RS12215	R	RHE_RS27240_m5	R	-116	-103	CATATGCACAAATA	12.4	5.7e-07	-14378	6244
RHE_RS12220	D	RHE_RS27240_m5	D	-84	-71	CATATGCACAAATA	12.4	5.7e-07	-14378	6244
RHE_RS17140	R	RHE_RS27240_m5	R	-116	-103	AATACGAACAAATA	11.6	1.3e-06	-13553	5886
RHE_RS17145	D	RHE_RS27240_m5	D	-18	-5	AATACGAACAAATA	11.6	1.3e-06	-13553	5886
RHE_RS25060	R	RHE_RS27240_m5	R	-63	-50	ATAACGCACAAATT	10.3	4.4e-06	-12334	5357
RHE_RS25065	D	RHE_RS27240_m5	D	-102	-89	ATAACGCACAAATT	10.3	4.4e-06	-12334	5357
RHE_RS02355	R	RHE_RS27195_m2	R	-41	-31	GCACGGTTCCC	9.5	2.4e-06	-12940	5620
RHE_RS14055	R	RHE_RS27195_m2	R	-42	-32	GTACGGTTCGT	10.0	9.7e-07	-13846	6013
RHE_RS15185	D	RHE_RS27195_m2	D	-87	-77	GCACGGTTCCG	9.2	8.1e-06	-11724	5092
RHE_RS27195	D	RHE_RS27195_m2	D	-93	-83	GGACGGTTCCA	9.2	8.1e-06	-11724	5092
RHE_RS04645	D	RHE_RS27195_m3	D	-145	-119	TCCAAGCTGGGGGTCTGTGGTTGTAGT	11.0	1.5e-06	-13410	5824
RHE_RS20455	R	RHE_RS27195_m3	R	-249	-223	TCCACCATGATTATATCTCGCAACAAT	8.8	9.4e-06	-11575	5027
RHE_RS20460	D	RHE_RS27195_m3	D	-168	-142	TCCACCATGATTATATCTCGCAACAAT	8.8	9.4e-06	-11575	5027
RHE_RS27195	D	RHE_RS27195_m3	D	-86	-60	TCCACGCTTAAATTAGTTAATGGTAAT	22.4	1.8e-13	-29346	12745
RHE_RS11380	D	RHE_RS27195_m4	D	-84	-58	TTAACTCCCCTTCTTGAGGGATCGTCA	12.0	6.8e-07	-14201	6167
RHE_RS14875	D	RHE_RS27195_m4	D	-185	-159	TTAACACACGACGCCGTGCAGGCGTAG	9.7	8.2e-06	-11711	5086
RHE_RS27310	R	RHE_RS27195_m4	R	-135	-109	AGAACTCATAAGTTCTGTAATGCGTTG	9.5	9.8e-06	-11533	5009
RHE_RS05065	D	RHE_RS27195_m5	D	-100	-86	ATCGTTCGACCACAA	10.2	6.7e-06	-11913	5174
RHE_RS06895	D	RHE_RS27185_m1	D	-270	-245	GCAAAATCAGGCTTTTCTTAACAAAG	8.9	2.4e-06	-12940	5620
RHE_RS17140	R	RHE_RS27185_m1	R	-92	-67	GGATAATCGTGCATTCTCTGGCATCA	13.3	1.3e-07	-15856	6886
RHE_RS17145	D	RHE_RS27185_m1	D	-54	-29	GGATAATCGTGCATTCTCTGGCATCA	13.3	1.3e-07	-15856	6886
RHE_RS27185	D	RHE_RS27185_m1	D	-53	-28	GAACAATCCGACAACATTTGACAACA	17.1	4.9e-09	-19134	8310
RHE_RS27185	D	RHE_RS27185_m1	D	-30	-5	ACATAATTCGGCTATGGTGAATAAAG	6.6	8.9e-06	-11629	5051
RHE_RS18145	D	RHE_RS27185_m2	D	-23	-12	CAGAACAATCGA	11.0	2.8e-06	-12786	5553
RHE_RS01740	D	RHE_RS27185_m3	D	-23	-1	CGAATTCGGAAAGACCGAACAAT	8.1	6.1e-06	-12007	5215
RHE_RS05330	R	RHE_RS27185_m3	R	-59	-37	ACAGTTCCGAATTTCTGAACTAC	9.3	3.0e-06	-12717	5523
RHE_RS05335	D	RHE_RS27185_m3	D	-75	-53	ACAGTTCCGAATTTCTGAACTAC	9.3	3.0e-06	-12717	5523
RHE_RS17140	R	RHE_RS27185_m3	R	-114	-92	ACTATCCGGGAAATACGAACAAA	11.0	9.9e-07	-13826	6004
RHE_RS17145	D	RHE_RS27185_m3	D	-29	-7	ACTATCCGGGAAATACGAACAAA	11.0	9.9e-07	-13826	6004
RHE_RS27185	D	RHE_RS27185_m3	D	-28	-6	ATAATTCGGCTATGGTGAATAAA	18.9	2.8e-10	-21996	9553
RHE_RS09575	R	RHE_RS27185_m4	R	-151	-132	GACGAATTATGGTTTCTAAT	6.4	7.1e-06	-11855	5149
RHE_RS11220	R	RHE_RS27185_m4	R	-101	-82	TGCGATTTCAGAAGTCAATC	5.8	9.8e-06	-11533	5009
RHE_RS21085	R	RHE_RS27185_m4	R	-27	-8	GACCAATACTCTTTTCAATT	8.0	3.0e-06	-12717	5523
RHE_RS25040	R	RHE_RS27185_m4	R	-225	-206	ACCAAAATGTAATGTAAATT	6.2	8.4e-06	-11687	5076
RHE_RS01020	R	RHE_RS27185_m5	R	-359	-330	AACGGCAACAGTTGGCGGACGTGCTGAACA	4.2	2.0e-06	-13122	5699
RHE_RS17140	R	RHE_RS27185_m5	R	-112	-83	TCTGGCATCACTATCCGGGAAATACGAACA	10.5	7.0e-08	-16475	7155
RHE_RS17145	D	RHE_RS27185_m5	D	-38	-9	TCTGGCATCACTATCCGGGAAATACGAACA	10.5	7.0e-08	-16475	7155
RHE_RS27185	D	RHE_RS27185_m5	D	-37	-8	TTTGACAACATAATTCGGCTATGGTGAATA	28.3	3.4e-14	-31012	13469
RHE_RS03695	D	RHE_RS27050_m1	D	-135	-126	CCGTACCAAG	10.7	5.3e-06	-12148	5276
RHE_RS25865	D	RHE_RS27050_m2	D	-65	-44	TAGCGGGAGATCGCCGCGCAAC	9.6	9.0e-06	-11618	5046
RHE_RS05190	R	RHE_RS27050_m4	R	-315	-302	GGGCTCTGGCCCTC	11.8	1.3e-07	-15856	6886
RHE_RS05195	D	RHE_RS27050_m4	D	-283	-270	GGGCTCTGGCCCTC	11.8	1.3e-07	-15856	6886
RHE_RS07760	R	RHE_RS27050_m4	R	-173	-160	CGGCTCTCGCCCGA	10.0	9.0e-06	-11618	5046
RHE_RS11005	R	RHE_RS27050_m4	R	-298	-285	CGGCTCTCCCCCGA	10.3	5.3e-06	-12148	5276
RHE_RS27050	D	RHE_RS27050_m4	D	-33	-20	CAGCTCTTGCCCCA	10.0	9.0e-06	-11618	5046
RHE_RS02810	R	RHE_RS27050_m5	R	-81	-61	ACAAGGAAGATGAGATGACGT	13.0	2.5e-07	-15202	6602
RHE_RS20575	D	RHE_RS26875_m1	D	-340	-327	ATCCTGCGTGTCGC	9.9	7.4e-06	-11814	5131
RHE_RS26875	R	RHE_RS26875_m2	R	-381	-359	GCGCGCCGGCCGGGGAGTGACCA	5.0	9.1e-06	-11607	5041
RHE_RS30745	R	RHE_RS26875_m2	R	-37	-15	TGGAGAATCCACGGGGTGGCTGA	5.4	7.8e-06	-11761	5108
RHE_RS12350	D	RHE_RS26875_m4	D	-135	-120	TTCCGTGGGATTTCTG	10.4	2.7e-06	-12822	5569
RHE_RS17020	D	RHE_RS26875_m5	D	-110	-83	TTTTCCGTTTTAGTAGGGTTACCAACAC	8.1	5.5e-07	-14413	6260
RHE_RS26875	R	RHE_RS26875_m5	R	-144	-117	TTACCGATACCGGTATCGATAACACTCA	7.7	6.9e-07	-14187	6161
RHE_RS26840	D	RHE_RS26840_m1	D	-15	-6	ATACGAGCTA	10.4	6.5e-07	-14246	6187
RHE_RS02355	R	RHE_RS26840_m2	R	-137	-125	CGTACATCCTAAT	11.0	2.2e-06	-13027	5658
RHE_RS03980	D	RHE_RS26840_m2	D	-352	-340	CTTACGGACTATT	9.6	7.9e-06	-11749	5102
RHE_RS13800	R	RHE_RS26840_m2	R	-113	-101	CCTACCTACTAGT	9.5	8.6e-06	-11664	5066
RHE_RS13805	D	RHE_RS26840_m2	D	-40	-28	CCTACCTACTAGT	9.5	8.6e-06	-11664	5066
RHE_RS26840	D	RHE_RS26840_m2	D	-16	-4	CATACGAGCTAGA	9.9	5.9e-06	-12041	5229
RHE_RS09865	D	RHE_RS26840_m3	D	-15	-4	AGAGCATACGTG	9.7	9.2e-06	-11596	5036
RHE_RS08430	D	RHE_RS26840_m4	D	-364	-349	AGAGCGTGGTGGCTGA	10.4	3.7e-06	-12507	5432
RHE_RS14540	R	RHE_RS26800_m2	R	-225	-210	CCGATCGAAACGAAAA	10.3	6.0e-06	-12024	5222
RHE_RS18760	D	RHE_RS26800_m2	D	-34	-19	GGGATTTAGGCGAAAA	10.1	7.5e-06	-11801	5125
RHE_RS26800	D	RHE_RS26800_m2	D	-20	-5	CCGATTGGAAAGAACC	9.9	9.0e-06	-11618	5046
RHE_RS06200	R	RHE_RS26800_m3	R	-63	-47	TCCCCGCTGACAAAGAG	6.3	5.9e-06	-12041	5229
RHE_RS07330	R	RHE_RS26800_m3	R	-286	-270	CCCCCGCCAAAAAAGCG	6.3	5.5e-06	-12111	5260
RHE_RS18935	D	RHE_RS26800_m3	D	-162	-146	TCCCCGAGGGGGAAGAG	6.6	4.7e-06	-12268	5328
RHE_RS21075	R	RHE_RS26800_m3	R	-62	-46	GCACCGCCGGTAAAGGT	6.9	4.0e-06	-12429	5398
RHE_RS30285	D	RHE_RS26800_m3	D	-314	-298	TGCCCGCGCGTAAAGCG	6.1	6.1e-06	-12007	5215
RHE_RS08160	R	RHE_RS26800_m4	R	-55	-44	TTCGAGGGGAAC	11.1	6.9e-07	-14187	6161
RHE_RS06050	R	RHE_RS26795_m1	R	-36	-16	CCCGTTGGCAAGGCGAACTGG	11.0	2.1e-06	-13074	5678
RHE_RS18795	D	RHE_RS26795_m1	D	-73	-53	ATAGTTGCAAAGACAAAGGGG	9.2	8.8e-06	-11641	5056
RHE_RS26795	D	RHE_RS26795_m1	D	-30	-10	GGAGTTCGACACGCGAAGGAG	13.8	1.3e-07	-15856	6886
RHE_RS28005	R	RHE_RS26795_m1	R	-171	-151	CAAGTTGCACAGACGAAGGAA	11.1	1.9e-06	-13174	5721
RHE_RS28010	D	RHE_RS26795_m1	D	-62	-42	CAAGTTGCACAGACGAAGGAA	11.1	1.9e-06	-13174	5721
RHE_RS07800	R	RHE_RS26795_m2	R	-24	-4	TACTCCCTTGGGTGTCGATAG	9.6	5.6e-06	-12093	5252
RHE_RS26680	D	RHE_RS26795_m3	D	-256	-228	ATCAACTCTCGCATGGGTCGGATGTTCCC	8.7	5.5e-06	-12111	5260
RHE_RS26765	D	RHE_RS26795_m3	D	-171	-143	TCGAACCTGTGAAGTCGGTGAAGGTTCCC	12.7	2.8e-07	-15088	6553
RHE_RS26795	D	RHE_RS26795_m3	D	-50	-22	TGCAACTTTCGCCTTCAGCGGGAGTTCGA	19.6	1.4e-10	-22689	9854
RHE_RS13070	R	RHE_RS26795_m4	R	-74	-62	GCAACTCCCGCTC	11.0	3.2e-06	-12652	5495
RHE_RS26795	D	RHE_RS26795_m4	D	-49	-37	GCAACTTTCGCCT	11.9	5.9e-07	-14343	6229
RHE_RS02610	D	RHE_RS26795_m5	D	-402	-373	TGATGGCAGAATCCCTCACCGTTGTCCCGG	6.4	8.6e-06	-11664	5066
RHE_RS07760	R	RHE_RS26790_m1	R	-125	-99	AGAACTCGGGCGTTACGCGAGGCTTAC	2.5	7.4e-06	-11814	5131
RHE_RS12970	R	RHE_RS26790_m1	R	-126	-100	GAAACTTGTCCATGCCGCGCACGTTCC	6.2	1.2e-06	-13633	5921
RHE_RS26790	D	RHE_RS26790_m1	D	-66	-40	GGAACAGGTGCGCAATGCGAACGTTTC	24.9	1.6e-12	-27161	11796
RHE_RS11805	R	RHE_RS26790_m2	R	-28	-19	AGATCTGCCT	9.9	6.6e-06	-11928	5180
RHE_RS16530	D	RHE_RS26790_m2	D	-342	-333	AGATCTGCTG	10.6	1.3e-06	-13553	5886
RHE_RS08535	D	RHE_RS26790_m3	D	-232	-221	TACTGCCTCCCA	10.6	1.3e-06	-13553	5886
RHE_RS09625	R	RHE_RS26790_m3	R	-17	-6	ATCAGTCTCCCG	10.5	1.7e-06	-13285	5770
RHE_RS13450	R	RHE_RS26790_m3	R	-74	-63	ATCTGTCTCCTG	9.6	8.7e-06	-11652	5060
RHE_RS18895	R	RHE_RS26790_m3	R	-43	-32	AACTGCCTCCCA	10.6	1.3e-06	-13553	5886
RHE_RS18900	D	RHE_RS26790_m3	D	-180	-169	AACTGCCTCCCA	10.6	1.3e-06	-13553	5886
RHE_RS28850	R	RHE_RS26790_m3	R	-14	-3	ATCTGTCTCCTA	9.8	6.3e-06	-11975	5201
RHE_RS28855	D	RHE_RS26790_m3	D	-97	-86	ATCTGTCTCCTA	9.8	6.3e-06	-11975	5201
RHE_RS05330	R	RHE_RS26790_m4	R	-74	-62	AACAGGGGCGCCA	11.1	4.8e-07	-14549	6319
RHE_RS05335	D	RHE_RS26790_m4	D	-50	-38	AACAGGGGCGCCA	11.1	4.8e-07	-14549	6319
RHE_RS16340	R	RHE_RS26790_m4	R	-70	-58	AACAGGGCCGCTA	9.7	8.2e-06	-11711	5086
RHE_RS16345	D	RHE_RS26790_m4	D	-76	-64	AACAGGGCCGCTA	9.7	8.2e-06	-11711	5086
RHE_RS26790	D	RHE_RS26790_m4	D	-64	-52	AACAGGTGCGCAA	11.8	7.1e-08	-16461	7149
RHE_RS01075	R	RHE_RS26790_m5	R	-52	-42	GCGGAACAGGG	10.1	4.9e-06	-12226	5310
RHE_RS01080	D	RHE_RS26790_m5	D	-104	-94	GCGGAACAGGG	10.1	4.9e-06	-12226	5310
RHE_RS07240	R	RHE_RS26790_m5	R	-209	-199	GCGGAACAGAT	9.6	9.7e-06	-11543	5013
RHE_RS26790	D	RHE_RS26790_m5	D	-68	-58	TCGGAACAGGT	10.5	2.6e-06	-12860	5585
RHE_RS30470	D	RHE_RS26790_m5	D	-397	-387	CGGGAACAGCT	9.9	6.3e-06	-11975	5201
RHE_RS18580	R	RHE_RS26765_m1	R	-49	-19	GGCAGAGTGGATAGGCCAGTCGCCCGATAAA	3.4	4.4e-06	-12334	5357
RHE_RS26610	R	RHE_RS26765_m1	R	-65	-35	CATAAACTGGTATGATGAGTCAATCACCATA	2.7	6.0e-06	-12024	5222
RHE_RS26765	D	RHE_RS26765_m1	D	-66	-36	ATCGAATTGGTCAGGCCAGTTGACCAGCTGC	24.8	1.5e-12	-27226	11824
RHE_RS28420	R	RHE_RS26765_m1	R	-293	-263	GTACATTTGGTATGACCAGATTAGGGAAAGC	7.9	5.1e-07	-14489	6292
RHE_RS28425	D	RHE_RS26765_m1	D	-79	-49	GTACATTTGGTATGACCAGATTAGGGAAAGC	7.9	5.1e-07	-14489	6292
RHE_RS10640	D	RHE_RS26765_m2	D	-64	-38	TGTCTTCGGTTTTTGGTCATGCCACTA	1.6	8.1e-06	-11724	5092
RHE_RS17050	D	RHE_RS26765_m2	D	-54	-28	GGTAGCGTGTAGGGGGCCAGACCACCT	1.6	8.1e-06	-11724	5092
RHE_RS18580	R	RHE_RS26765_m2	R	-39	-13	CTATTCGGCAGAGTGGATAGGCCAGTC	4.4	2.3e-06	-12983	5638
RHE_RS25290	D	RHE_RS26765_m2	D	-64	-38	GCGAAATGCTAAGATGTCAGACCAATT	7.3	5.8e-07	-14360	6237
RHE_RS26765	D	RHE_RS26765_m2	D	-72	-46	TTACCAATCGAATTGGTCAGGCCAGTT	18.5	6.5e-10	-21154	9187
RHE_RS27930	R	RHE_RS26765_m2	R	-58	-32	ACATCATCGCGACTGGTCTGGCCAATC	1.3	9.2e-06	-11596	5036
RHE_RS27935	D	RHE_RS26765_m2	D	-141	-115	ACATCATCGCGACTGGTCTGGCCAATC	1.3	9.2e-06	-11596	5036
RHE_RS28420	R	RHE_RS26765_m2	R	-283	-257	ATGATTGTACATTTGGTATGACCAGAT	4.7	2.0e-06	-13122	5699
RHE_RS28420	R	RHE_RS26765_m2	R	-106	-80	TTACCTGGCAATCTGGTTTGGCCACTT	3.8	3.1e-06	-12684	5509
RHE_RS28425	D	RHE_RS26765_m2	D	-262	-236	TTACCTGGCAATCTGGTTTGGCCACTT	3.8	3.1e-06	-12684	5509
RHE_RS28425	D	RHE_RS26765_m2	D	-85	-59	ATGATTGTACATTTGGTATGACCAGAT	4.7	2.0e-06	-13122	5699
RHE_RS07140	D	RHE_RS26765_m3	D	-105	-95	TTGACGCACTG	11.0	2.6e-06	-12860	5585
RHE_RS15650	R	RHE_RS26765_m3	R	-163	-153	GTGACGCACTG	10.7	3.4e-06	-12592	5469
RHE_RS26765	D	RHE_RS26765_m3	D	-94	-84	TTGACGCACAA	10.9	2.8e-06	-12786	5553
RHE_RS28510	R	RHE_RS26765_m3	R	-162	-152	TCGACGCATCG	9.8	9.5e-06	-11564	5022
RHE_RS26635	D	RHE_RS26765_m4	D	-130	-102	TGATCTGGTATAATGAGTACTCCAACTGT	9.2	7.9e-07	-14051	6102
RHE_RS26765	D	RHE_RS26765_m4	D	-64	-36	CGAATTGGTCAGGCCAGTTGACCAGCTGC	21.4	5.1e-11	-23699	10292
RHE_RS28420	R	RHE_RS26765_m4	R	-285	-257	ATGATTGTACATTTGGTATGACCAGATTA	4.8	7.3e-06	-11828	5137
RHE_RS28420	R	RHE_RS26765_m4	R	-108	-80	TTACCTGGCAATCTGGTTTGGCCACTTTT	8.4	1.3e-06	-13553	5886
RHE_RS28425	D	RHE_RS26765_m4	D	-262	-234	TTACCTGGCAATCTGGTTTGGCCACTTTT	8.4	1.3e-06	-13553	5886
RHE_RS28425	D	RHE_RS26765_m4	D	-85	-57	ATGATTGTACATTTGGTATGACCAGATTA	4.8	7.3e-06	-11828	5137
RHE_RS06000	D	RHE_RS26765_m5	D	-141	-127	GCGGCGAGCTGACCA	10.3	3.1e-06	-12684	5509
RHE_RS26765	D	RHE_RS26765_m5	D	-55	-41	CAGGCCAGTTGACCA	16.1	1.1e-09	-20628	8959
RHE_RS12205	D	RHE_RS26720_m1	D	-24	-3	CACTGAACAATAAAGTACAACG	9.9	4.6e-07	-14592	6337
RHE_RS17020	D	RHE_RS26720_m1	D	-139	-118	CTCTGGACACCATTACACAATT	7.7	1.7e-06	-13285	5770
RHE_RS18110	R	RHE_RS26720_m1	R	-183	-162	CACTGGGCGCGACTGCGCAATG	4.7	9.3e-06	-11585	5032
RHE_RS23380	D	RHE_RS26720_m1	D	-74	-53	CTCTTTGCGATAGCTCAATGAG	6.6	3.3e-06	-12622	5481
RHE_RS26720	D	RHE_RS26720_m1	D	-91	-70	GTCTGTACGCTATTGCACAATG	21.2	6.2e-11	-23504	10208
RHE_RS26730	R	RHE_RS26720_m1	R	-100	-79	AATTGTACGGAACTGAACAGTC	6.7	3.1e-06	-12684	5509
RHE_RS12205	D	RHE_RS26720_m2	D	-24	-3	CACTGAACAATAAAGTACAACG	7.4	6.8e-07	-14201	6167
RHE_RS17020	D	RHE_RS26720_m2	D	-139	-118	CTCTGGACACCATTACACAATT	6.2	1.3e-06	-13553	5886
RHE_RS18110	R	RHE_RS26720_m2	R	-183	-162	CACTGGGCGCGACTGCGCAATG	4.4	3.3e-06	-12622	5481
RHE_RS23380	D	RHE_RS26720_m2	D	-74	-53	CTCTTTGCGATAGCTCAATGAG	3.0	6.3e-06	-11975	5201
RHE_RS25060	R	RHE_RS26720_m2	R	-62	-41	AAATGTCAAATAACGCACAAAT	2.3	9.1e-06	-11607	5041
RHE_RS25065	D	RHE_RS26720_m2	D	-111	-90	AAATGTCAAATAACGCACAAAT	2.3	9.1e-06	-11607	5041
RHE_RS26720	D	RHE_RS26720_m2	D	-91	-70	GTCTGTACGCTATTGCACAATG	21.7	4.0e-11	-23942	10398
RHE_RS26730	R	RHE_RS26720_m2	R	-100	-79	AATTGTACGGAACTGAACAGTC	3.8	4.3e-06	-12357	5367
RHE_RS06015	R	RHE_RS26720_m4	R	-70	-56	CACTTGCGTACAATT	8.8	2.3e-06	-12983	5638
RHE_RS28550	R	RHE_RS26720_m4	R	-109	-95	CACTAATGTACATTT	7.1	6.3e-06	-11975	5201
RHE_RS28555	D	RHE_RS26720_m4	D	-56	-42	CACTAATGTACATTT	7.1	6.3e-06	-11975	5201
RHE_RS29075	D	RHE_RS26720_m4	D	-231	-217	CCCCAGTGCACAGAC	7.5	5.3e-06	-12148	5276
RHE_RS24620	D	RHE_RS26720_m5	D	-26	-9	ACCTTAACAATGTAGAAT	9.8	3.6e-07	-14837	6444
RHE_RS01550	R	RHE_RS26695_m1	R	-111	-99	AACGTTACAGTAT	10.9	3.9e-06	-12455	5409
RHE_RS02855	D	RHE_RS26695_m1	D	-14	-2	CGGGTTACAGGCA	11.1	3.1e-06	-12684	5509
RHE_RS06955	R	RHE_RS26695_m1	R	-127	-115	AACGTTACAGTAG	10.9	3.9e-06	-12455	5409
RHE_RS18615	R	RHE_RS26695_m1	R	-110	-98	AACGTTACAGTAG	10.9	3.9e-06	-12455	5409
RHE_RS26695	R	RHE_RS26695_m1	R	-87	-75	TCGGTTACAGCGA	10.1	9.1e-06	-11607	5041
RHE_RS03995	D	RHE_RS26695_m2	D	-141	-125	CTTCACGTCTGCGTGAG	12.9	4.2e-07	-14683	6377
RHE_RS15225	D	RHE_RS26695_m2	D	-83	-67	CCTCACGTCTCCGTGAT	10.8	2.4e-06	-12940	5620
RHE_RS17090	D	RHE_RS26695_m2	D	-164	-148	CCTCACACCTGCGTGAG	11.9	1.0e-06	-13816	6000
RHE_RS19595	R	RHE_RS26695_m2	R	-119	-103	CCTCACACCCTTGTGAA	11.8	1.1e-06	-13720	5959
RHE_RS24075	R	RHE_RS26695_m2	R	-140	-124	TGTCACATCGGCGTGAG	12.0	9.4e-07	-13877	6027
RHE_RS08570	D	RHE_RS26695_m3	D	-224	-194	AATGTAGCAAATGGCGCGCGAGCGCGATTTG	6.2	4.1e-06	-12405	5387
RHE_RS15960	R	RHE_RS26695_m3	R	-61	-31	GGAGTAACCGCTTAGCCGACAGGTCGCATCA	5.0	7.6e-06	-11787	5119
RHE_RS17915	D	RHE_RS26695_m3	D	-130	-100	TAAGAAACGGCTTGCGCATTTGCGCTAATGA	5.2	6.9e-06	-11884	5161
RHE_RS23065	D	RHE_RS26695_m3	D	-46	-16	GCCGAAACACAATAGAAGGCTTTTCGAACGA	5.6	5.6e-06	-12093	5252
RHE_RS26695	R	RHE_RS26695_m3	R	-162	-132	GCTGTAACGCATTCCGACGCTTGTCGAATGG	17.1	3.6e-09	-19442	8444
RHE_RS25150	R	RHE_RS26695_m4	R	-98	-85	ATCCGTTACATGCA	9.0	8.5e-06	-11675	5071
RHE_RS26695	R	RHE_RS26695_m4	R	-87	-74	ATCGGTTACAGCGA	11.6	1.5e-06	-13410	5824
RHE_RS03040	R	RHE_RS26695_m5	R	-142	-131	TAATCACGATAG	10.0	8.2e-06	-11711	5086
RHE_RS16565	D	RHE_RS26695_m5	D	-214	-203	CTCTCACGAACG	10.8	2.8e-06	-12786	5553
RHE_RS20575	D	RHE_RS26695_m5	D	-211	-200	CCATCACGAAAG	10.1	7.4e-06	-11814	5131
RHE_RS06620	D	RHE_RS26680_m1	D	-52	-22	GAGGAAACTCCGCGCGGCTCGATTGTTCTGA	10.2	1.6e-06	-13346	5796
RHE_RS26680	D	RHE_RS26680_m1	D	-257	-227	AATCAACTCTCGCATGGGTCGGATGTTCCCG	16.5	8.1e-09	-18631	8092
RHE_RS26680	D	RHE_RS26680_m1	D	-140	-110	ACCGAACGACTGCGGGGCGCCGTTGTTCCCA	17.5	3.0e-09	-19625	8523
RHE_RS26790	D	RHE_RS26680_m1	D	-68	-38	TCGGAACAGGTGCGCAATGCGAACGTTTCCA	8.7	4.2e-06	-12380	5377
RHE_RS26795	D	RHE_RS26680_m1	D	-51	-21	GTGCAACTTTCGCCTTCAGCGGGAGTTCGAC	9.8	2.1e-06	-13074	5678
RHE_RS26680	D	RHE_RS26680_m2	D	-59	-43	ATCGTACGGCAACGATT	19.1	7.1e-10	-21066	9149
RHE_RS30830	D	RHE_RS26680_m2	D	-304	-288	GCCGTACCGCAACGTAA	8.6	2.6e-06	-12860	5585
RHE_RS07315	D	RHE_RS26680_m3	D	-95	-84	TGTCGTACGGTC	10.1	4.0e-06	-12429	5398
RHE_RS14055	R	RHE_RS26680_m3	R	-34	-23	TACCGTACGGTA	15.9	5.2e-09	-19075	8284
RHE_RS24230	R	RHE_RS26680_m3	R	-59	-48	TATCGTACCGCA	10.4	3.4e-06	-12592	5469
RHE_RS26680	D	RHE_RS26680_m3	D	-60	-49	TATCGTACGGCA	14.0	2.0e-07	-15425	6699
RHE_RS02075	R	RHE_RS26680_m4	R	-76	-47	TGAACGAATTTGGCGATCCTCAATTTCCCC	8.5	7.3e-06	-11828	5137
RHE_RS02080	D	RHE_RS26680_m4	D	-156	-127	TGAACGAATTTGGCGATCCTCAATTTCCCC	8.5	7.3e-06	-11828	5137
RHE_RS14315	R	RHE_RS26680_m4	R	-76	-47	GAAACCAATCGGAGGCGGATATTTTCCCGT	8.9	5.6e-06	-12093	5252
RHE_RS26680	D	RHE_RS26680_m4	D	-138	-109	CGAACGACTGCGGGGCGCCGTTGTTCCCAT	15.3	2.5e-08	-17504	7602
RHE_RS26680	D	RHE_RS26680_m4	D	-51	-22	GCAACGATTAGGGAGCCAGCGACTTTCCTT	24.6	4.5e-15	-33035	14347
RHE_RS07315	D	RHE_RS26680_m5	D	-95	-78	TGTCGTACGGTCACTTTT	5.2	7.2e-06	-11841	5143
RHE_RS14055	R	RHE_RS26680_m5	R	-40	-23	TACCGTACGGTACGGTTC	5.8	5.3e-06	-12148	5276
RHE_RS26680	D	RHE_RS26680_m5	D	-60	-43	TATCGTACGGCAACGATT	21.1	1.1e-10	-22931	9959
RHE_RS30830	D	RHE_RS26680_m5	D	-305	-288	AGCCGTACCGCAACGTAA	4.9	8.9e-06	-11629	5051
RHE_RS01720	R	RHE_RS26635_m1	R	-41	-13	TAAAGTCATCTGATGACTTTATGAGTAGA	10.6	1.0e-07	-16118	7000
RHE_RS01720	R	RHE_RS26635_m1	R	-33	-5	TCTACTCATAAAGTCATCTGATGACTTTA	10.9	8.4e-08	-16292	7076
RHE_RS26445	D	RHE_RS26635_m1	D	-189	-161	CCACCTCAATTAACCAGTTTACCAGTGAC	8.7	2.8e-07	-15088	6553
RHE_RS26610	R	RHE_RS26635_m1	R	-65	-37	TAAACTGGTATGATGAGTCAATCACCATA	4.7	2.1e-06	-13074	5678
RHE_RS26610	R	RHE_RS26635_m1	R	-57	-29	TAGGATCATAAACTGGTATGATGAGTCAA	3.0	4.4e-06	-12334	5357
RHE_RS26635	D	RHE_RS26635_m1	D	-138	-110	CCAACTCGTGATCTGGTATAATGAGTACT	22.8	1.8e-11	-24741	10745
RHE_RS26635	D	RHE_RS26635_m1	D	-130	-102	TGATCTGGTATAATGAGTACTCCAACTGT	2.6	5.5e-06	-12111	5260
RHE_RS27645	D	RHE_RS26635_m1	D	-270	-242	ACACGTTCTCAAATGATTACAAGAGTTGA	2.2	6.3e-06	-11975	5201
RHE_RS01020	R	RHE_RS26635_m2	R	-381	-362	AACTGGAGTTAGGAGTACCC	5.6	4.0e-07	-14732	6398
RHE_RS26610	R	RHE_RS26635_m2	R	-58	-39	AACTGGTATGATGAGTCAAT	9.1	7.3e-08	-16433	7137
RHE_RS26635	D	RHE_RS26635_m2	D	-128	-109	ATCTGGTATAATGAGTACTC	26.4	1.3e-12	-27369	11886
RHE_RS02910	R	RHE_RS26635_m3	R	-93	-84	TAGCGAGATT	10.4	2.5e-06	-12899	5602
RHE_RS20070	R	RHE_RS26635_m3	R	-67	-58	TAGCGAGATT	10.4	2.5e-06	-12899	5602
RHE_RS04090	R	RHE_RS26495_m1	R	-19	-3	TGAATAGCCCCGATATT	9.9	6.7e-06	-11913	5174
RHE_RS26495	R	RHE_RS26495_m1	R	-23	-7	TCAATATCCCTTATATG	16.5	6.5e-10	-21154	9187
RHE_RS00340	D	RHE_RS26495_m2	D	-297	-268	AAAATATTACAATTTGTACTGAAATATTAC	10.0	5.6e-06	-12093	5252
RHE_RS15585	D	RHE_RS26495_m2	D	-60	-31	AAAATTCAGTGAGTCCTAACTTTATATGTA	10.4	3.8e-06	-12481	5420
RHE_RS17200	R	RHE_RS26495_m2	R	-108	-79	AAAATAGCTAATATTTATAGCTTGTATCGG	10.4	3.8e-06	-12481	5420
RHE_RS22910	D	RHE_RS26495_m2	D	-56	-27	TTAATCCAGTAATTTTATAGACAATATTCG	9.7	7.5e-06	-11801	5125
RHE_RS23465	D	RHE_RS26495_m2	D	-45	-16	CGAATAGTAGTGATAGCTACCATCGATTTT	10.8	2.6e-06	-12860	5585
RHE_RS23695	R	RHE_RS26495_m2	R	-174	-145	GGTATTTAGATCACATGTACATTATATTGG	11.1	1.9e-06	-13174	5721
RHE_RS23835	R	RHE_RS26495_m2	R	-167	-138	TTAATACGTTGAAAATGCACAACTTATTGA	9.8	6.8e-06	-11899	5167
RHE_RS25970	R	RHE_RS26495_m2	R	-71	-42	AAAATTTTCACCACAAGATAATTATATTTG	10.3	4.2e-06	-12380	5377
RHE_RS26495	R	RHE_RS26495_m2	R	-36	-7	TCAATATCCCTTATATGATCATTCAATTTC	15.2	9.5e-09	-18472	8022
RHE_RS09835	R	RHE_RS26495_m3	R	-188	-174	GATGATTCGACTGGT	9.8	8.1e-06	-11724	5092
RHE_RS18895	R	RHE_RS26495_m3	R	-112	-98	GATGATTGGAATAAT	10.0	6.7e-06	-11913	5174
RHE_RS18900	D	RHE_RS26495_m3	D	-114	-100	GATGATTGGAATAAT	10.0	6.7e-06	-11913	5174
RHE_RS01260	R	RHE_RS26495_m4	R	-120	-99	GATAATGTATTTCTCTTATAGT	10.5	2.4e-06	-12940	5620
RHE_RS01265	D	RHE_RS26495_m4	D	-41	-20	GATAATGTATTTCTCTTATAGT	10.5	2.4e-06	-12940	5620
RHE_RS03580	D	RHE_RS26495_m4	D	-88	-67	GGAAATAGAATAGTTCGATGTG	9.2	7.2e-06	-11841	5143
RHE_RS11740	R	RHE_RS26495_m4	R	-230	-209	GATAATCGATTATTATTATAGT	12.3	5.2e-07	-14469	6284
RHE_RS17405	D	RHE_RS26495_m4	D	-75	-54	GTAAATGCTTAGGTCTTATAAA	10.7	2.1e-06	-13074	5678
RHE_RS20315	R	RHE_RS26495_m4	R	-149	-128	GAAAAATAAATGTTATAATTAG	8.9	8.3e-06	-11699	5081
RHE_RS22910	D	RHE_RS26495_m4	D	-57	-36	TTTAATCCAGTAATTTTATAGA	10.7	2.1e-06	-13074	5678
RHE_RS32435	D	RHE_RS26495_m4	D	-70	-49	GGTAATCGTTATTTCGGATATA	10.0	3.6e-06	-12535	5444
RHE_RS14740	R	RHE_RS26495_m5	R	-94	-69	GGTTAACCCATCCTTTACAATCATGG	10.5	1.6e-06	-13346	5796
RHE_RS26495	R	RHE_RS26495_m5	R	-30	-5	ACTCAATATCCCTTATATGATCATTC	24.2	3.2e-14	-31073	13495
RHE_RS29170	D	RHE_RS26495_m5	D	-203	-178	GATCGATGTCTCCATTTTGATCACAC	8.4	7.1e-06	-11855	5149
RHE_RS02055	D	RHE_RS26465_m1	D	-258	-238	CGCAGGAGATTTGCTACAGCT	2.2	5.1e-06	-12186	5292
RHE_RS26465	D	RHE_RS26465_m1	D	-30	-10	GACTGTAGAAAATCTACTGGA	24.0	6.9e-12	-25699	11161
RHE_RS26950	D	RHE_RS26465_m1	D	-38	-18	TATCGTAGAAATTGTATTGGG	2.9	3.7e-06	-12507	5432
RHE_RS01720	R	RHE_RS26465_m2	R	-313	-299	TGCAAGTAGAAATAC	8.0	3.6e-06	-12535	5444
RHE_RS13290	R	RHE_RS26465_m2	R	-72	-58	CTACTGGAGAAAATC	8.0	3.6e-06	-12535	5444
RHE_RS26465	D	RHE_RS26465_m2	D	-31	-17	AGACTGTAGAAAATC	19.8	2.8e-10	-21996	9553
RHE_RS26875	R	RHE_RS26465_m2	R	-163	-149	AAACAGTAGAGAAGC	7.9	3.7e-06	-12507	5432
RHE_RS28950	R	RHE_RS26465_m2	R	-22	-8	ATCCTGTTGAAAATC	9.1	1.9e-06	-13174	5721
RHE_RS02055	D	RHE_RS26465_m3	D	-259	-239	CCGCAGGAGATTTGCTACAGC	3.0	1.5e-06	-13410	5824
RHE_RS26465	D	RHE_RS26465_m3	D	-31	-11	AGACTGTAGAAAATCTACTGG	7.2	1.9e-07	-15476	6721
RHE_RS02055	D	RHE_RS26465_m4	D	-258	-238	CGCAGGAGATTTGCTACAGCT	0.1	9.2e-06	-11596	5036
RHE_RS26465	D	RHE_RS26465_m4	D	-30	-10	GACTGTAGAAAATCTACTGGA	24.3	5.3e-12	-25963	11276
RHE_RS26950	D	RHE_RS26465_m4	D	-38	-18	TATCGTAGAAATTGTATTGGG	2.8	2.9e-06	-12751	5538
RHE_RS26465	D	RHE_RS26465_m5	D	-30	-10	GACTGTAGAAAATCTACTGGA	24.3	5.7e-12	-25891	11244
RHE_RS26950	D	RHE_RS26465_m5	D	-38	-18	TATCGTAGAAATTGTATTGGG	2.9	2.7e-06	-12822	5569
RHE_RS13235	R	RHE_RS26355_m1	R	-120	-98	GGAAAGATAGTTTCCAACAGAAA	7.9	3.9e-06	-12455	5409
RHE_RS26355	D	RHE_RS26355_m1	D	-71	-49	GGCTTGATGTAATCTATCAAAAG	19.8	1.5e-10	-22620	9824
RHE_RS26355	D	RHE_RS26355_m1	D	-29	-7	TCCATGAGCGAATACATCAGGGA	15.6	2.3e-08	-17588	7638
RHE_RS12540	R	RHE_RS26355_m3	R	-69	-58	GTCGCCTCCCCT	11.0	2.7e-06	-12822	5569
RHE_RS26355	D	RHE_RS26355_m3	D	-129	-118	TCCGCCTCCCTA	12.6	4.5e-08	-16917	7347
RHE_RS02715	R	RHE_RS26355_m4	R	-91	-63	ATGCATATCTGCTGATAGATTATATCAGA	9.4	3.0e-07	-15019	6523
RHE_RS09730	D	RHE_RS26355_m4	D	-170	-142	TGTGATATATATTAGCAAAAACCGTTAAA	3.7	5.2e-06	-12167	5284
RHE_RS11370	D	RHE_RS26355_m4	D	-115	-87	TATGACAGTTTTTTTGAAAACCTTTCACA	2.5	8.9e-06	-11629	5051
RHE_RS22160	D	RHE_RS26355_m4	D	-166	-138	TCTGATTGTTTTAATTATAATATTTCTTG	3.3	6.2e-06	-11991	5208
RHE_RS26355	D	RHE_RS26355_m4	D	-69	-41	CTTGATGTAATCTATCAAAAGCCATCATG	26.3	9.7e-14	-29964	13013
RHE_RS20060	R	RHE_RS26355_m5	R	-228	-218	GCTCACGGAGG	10.9	4.0e-06	-12429	5398
RHE_RS11475	D	RHE_RS26290_m1	D	-52	-34	TTTCCATACCGAAAACATC	8.8	8.3e-06	-11699	5081
RHE_RS26290	D	RHE_RS26290_m2	D	-22	-4	GTCCTCAGGAGGGAAAACA	18.3	5.3e-11	-23661	10276
RHE_RS26945	D	RHE_RS26290_m2	D	-202	-184	CTCCTGAGGCGCGAAAACC	11.9	9.3e-07	-13888	6032
RHE_RS06955	R	RHE_RS26290_m3	R	-387	-364	TAAGTCGTCATAAGTAGATACGCC	0.4	7.4e-06	-11814	5131
RHE_RS06960	D	RHE_RS26290_m3	D	-196	-173	TAAGTCGTCATAAGTAGATACGCC	0.4	7.4e-06	-11814	5131
RHE_RS26290	D	RHE_RS26290_m3	D	-25	-2	CGTGTCCTCAGGAGGGAAAACAAA	19.8	1.7e-10	-22495	9770
RHE_RS00550	D	RHE_RS26290_m4	D	-22	-9	CGGGGGGAAAAAGA	9.1	6.3e-06	-11975	5201
RHE_RS02060	D	RHE_RS26290_m4	D	-17	-4	CAGAAGGAAAAAGA	12.0	8.5e-07	-13978	6071
RHE_RS11145	R	RHE_RS26290_m4	R	-38	-25	CAGGCGCGAAATGC	9.5	4.9e-06	-12226	5310
RHE_RS15430	R	RHE_RS26290_m4	R	-218	-205	CAGAAGGGAAAATA	10.6	2.4e-06	-12940	5620
RHE_RS26290	D	RHE_RS26290_m4	D	-17	-4	CAGGAGGGAAAACA	16.4	4.4e-09	-19242	8357
RHE_RS28070	D	RHE_RS26290_m4	D	-108	-95	CAGGAGGAAGAACA	8.8	8.5e-06	-11675	5071
RHE_RS15430	R	RHE_RS26290_m5	R	-217	-202	CCCCAGAAGGGAAAAT	11.1	2.6e-07	-15163	6585
RHE_RS24370	R	RHE_RS26290_m5	R	-69	-54	CATCAGAAGGGCAAAG	5.8	4.5e-06	-12311	5347
RHE_RS26290	D	RHE_RS26290_m5	D	-20	-5	CCTCAGGAGGGAAAAC	21.2	2.6e-10	-22070	9585
RHE_RS26945	D	RHE_RS26290_m5	D	-200	-185	CCTGAGGCGCGAAAAC	4.6	8.2e-06	-11711	5086
RHE_RS29620	D	RHE_RS26290_m5	D	-42	-27	CCAAAGGAGTGAAATC	4.5	8.6e-06	-11664	5066
RHE_RS06875	R	RHE_RS26280_m1	R	-204	-195	CAGGAGGAGA	10.8	2.8e-06	-12786	5553
RHE_RS06880	D	RHE_RS26280_m1	D	-17	-8	CAGGAGGAGA	10.8	2.8e-06	-12786	5553
RHE_RS18325	R	RHE_RS26280_m1	R	-208	-199	CAGGAGGAGA	10.8	2.8e-06	-12786	5553
RHE_RS23190	D	RHE_RS26280_m1	D	-13	-4	AAGGAGGAAA	10.5	6.5e-06	-11944	5187
RHE_RS26920	D	RHE_RS26280_m1	D	-17	-8	AAGGAGGAGG	10.5	6.5e-06	-11944	5187
RHE_RS05735	D	RHE_RS26280_m2	D	-40	-25	TCCGTATACGGACAAT	8.9	3.8e-06	-12481	5420
RHE_RS26280	D	RHE_RS26280_m2	D	-38	-23	TGCGGATATGCAGAAC	9.4	3.0e-06	-12717	5523
RHE_RS32675	R	RHE_RS26280_m2	R	-62	-47	TCTTTATACGGAAAGT	7.2	9.4e-06	-11575	5027
RHE_RS23065	D	RHE_RS26280_m3	D	-104	-90	TTATATACAAACTGT	9.8	2.8e-06	-12786	5553
RHE_RS25060	R	RHE_RS26280_m3	R	-43	-29	CGATATACGAACAAA	9.3	3.7e-06	-12507	5432
RHE_RS25065	D	RHE_RS26280_m3	D	-123	-109	CGATATACGAACAAA	9.3	3.7e-06	-12507	5432
RHE_RS25540	R	RHE_RS26280_m3	R	-67	-53	TCATAAACGATCATA	10.4	1.9e-06	-13174	5721
RHE_RS25545	D	RHE_RS26280_m3	D	-150	-136	TCATAAACGATCATA	10.4	1.9e-06	-13174	5721
RHE_RS26280	D	RHE_RS26280_m3	D	-102	-88	TTATAGACAAACAGA	16.5	8.1e-09	-18631	8092
RHE_RS02045	D	RHE_RS26280_m4	D	-115	-106	CGCTTGACCA	10.3	7.6e-06	-11787	5119
RHE_RS04435	D	RHE_RS26280_m4	D	-70	-61	CCCTTGACCC	10.8	6.1e-06	-12007	5215
RHE_RS12560	R	RHE_RS26280_m4	R	-108	-99	GGCTTGACCC	10.1	8.8e-06	-11641	5056
RHE_RS13580	D	RHE_RS26280_m4	D	-70	-61	GGCTTGACCA	10.9	4.0e-06	-12429	5398
RHE_RS15090	R	RHE_RS26280_m4	R	-214	-205	GCCTTGACCC	10.7	6.1e-06	-12007	5215
RHE_RS28420	R	RHE_RS26280_m4	R	-257	-248	GGCTTGACCA	10.9	4.0e-06	-12429	5398
RHE_RS28425	D	RHE_RS26280_m4	D	-94	-85	GGCTTGACCA	10.9	4.0e-06	-12429	5398
RHE_RS02560	D	RHE_RS26280_m5	D	-182	-167	ATCATATGCGCAGAAA	10.5	1.3e-06	-13553	5886
RHE_RS26280	D	RHE_RS26280_m5	D	-24	-9	ACAATATTCACAGGAG	14.5	8.7e-08	-16257	7060
RHE_RS00895	D	RHE_RS26115_m1	D	-100	-78	ACAAGCCGGCAGGGCCGGCAAGG	8.1	9.2e-06	-11596	5036
RHE_RS26115	R	RHE_RS26115_m1	R	-97	-75	GCATGCCGGCTGGAAAGGCAAAA	13.8	1.8e-07	-15530	6745
RHE_RS26115	R	RHE_RS26115_m1	R	-35	-13	TCCTGCCTCTCGGGGCGGCTGCT	13.2	3.1e-07	-14987	6509
RHE_RS29775	R	RHE_RS26115_m1	R	-187	-165	TGATGCCGTTACGGCCGGCATCA	12.8	4.7e-07	-14571	6328
RHE_RS11195	D	RHE_RS26115_m3	D	-14	-1	AAAGAGGCGCGGGT	9.7	7.1e-06	-11855	5149
RHE_RS15025	R	RHE_RS26115_m3	R	-355	-342	AAAGACGCGCGGCG	9.4	9.1e-06	-11607	5041
RHE_RS21900	R	RHE_RS26115_m3	R	-21	-8	AGAGAGCATCGGCT	10.4	3.9e-06	-12455	5409
RHE_RS28780	D	RHE_RS26115_m3	D	-137	-124	AGAGAGGCGCGGCA	9.7	7.1e-06	-11855	5149
RHE_RS11975	D	RHE_RS26115_m5	D	-294	-282	CGTAGCTGCCCCG	10.1	6.0e-06	-12024	5222
RHE_RS15960	R	RHE_RS26115_m5	R	-110	-98	CACAGCAGCCTCG	9.9	7.5e-06	-11801	5125
RHE_RS20540	R	RHE_RS26070_m2	R	-232	-222	AAAACGAGGAG	9.9	6.0e-06	-12024	5222
RHE_RS24475	R	RHE_RS26070_m2	R	-114	-104	AAAACGAGGAG	9.9	6.0e-06	-12024	5222
RHE_RS24480	D	RHE_RS26070_m2	D	-145	-135	AAAACGAGGAG	9.9	6.0e-06	-12024	5222
RHE_RS07925	R	RHE_RS26070_m3	R	-165	-140	GTCTATGTCATTGACAAAAGAGGAGC	9.6	6.8e-06	-11899	5167
RHE_RS09405	D	RHE_RS26070_m3	D	-167	-142	GACTAAGAAGTTAGTTATCCCTGATA	11.4	1.4e-06	-13479	5854
RHE_RS26070	D	RHE_RS26070_m3	D	-220	-195	TGCTATGAAATCGATGTGCCCGGACT	15.6	9.6e-09	-18462	8018
RHE_RS01320	D	RHE_RS26070_m4	D	-54	-39	GCGAGGAGGGCTTTTT	9.9	6.7e-06	-11913	5174
RHE_RS17720	D	RHE_RS26070_m4	D	-152	-137	GTGAGGTGCCCTCTTT	10.1	5.4e-06	-12129	5268
RHE_RS19030	D	RHE_RS26070_m4	D	-146	-131	GGGAGCAGATGTCGTG	10.0	6.7e-06	-11913	5174
RHE_RS26070	D	RHE_RS26070_m4	D	-244	-229	GTGAGCAGATCTCTTG	13.5	3.6e-08	-17140	7444
RHE_RS02695	D	RHE_RS26070_m5	D	-134	-114	CGTGGGAGGATGCCGCGGCCA	9.3	6.9e-06	-11884	5161
RHE_RS04150	R	RHE_RS26070_m5	R	-128	-108	CGGAGGGGGACACTTCGTTCA	10.8	1.9e-06	-13174	5721
RHE_RS11950	R	RHE_RS26070_m5	R	-74	-54	CGAGGGTGGCCATCGCGTTAA	9.2	7.6e-06	-11787	5119
RHE_RS24110	R	RHE_RS26070_m5	R	-287	-267	CGAGCGACGCTGACGCGTTCA	9.6	5.8e-06	-12058	5237
RHE_RS07760	R	RHE_RS26040_m1	R	-147	-138	GAAAAATCGG	11.2	2.3e-06	-12983	5638
RHE_RS18125	D	RHE_RS26040_m1	D	-21	-12	GAAAAATCAG	10.5	5.9e-06	-12041	5229
RHE_RS20060	R	RHE_RS26040_m1	R	-51	-42	GAAAAATCGG	11.2	2.3e-06	-12983	5638
RHE_RS23695	R	RHE_RS26040_m1	R	-126	-117	TAAAAATCGG	10.5	5.9e-06	-12041	5229
RHE_RS26040	D	RHE_RS26040_m1	D	-23	-14	GAAAAATCGG	11.2	2.3e-06	-12983	5638
RHE_RS04595	R	RHE_RS26040_m2	R	-119	-105	GGAAAAATGTGTGAG	13.1	2.7e-07	-15125	6569
RHE_RS09835	R	RHE_RS26040_m2	R	-27	-13	CGAAATGTCGGTGGC	9.1	5.9e-06	-12041	5229
RHE_RS26040	D	RHE_RS26040_m2	D	-24	-10	CGAAAAATCGGTGGG	17.3	4.0e-09	-19337	8398
RHE_RS27150	D	RHE_RS26040_m2	D	-163	-149	GGAAAAGCGTGTGGA	9.3	5.2e-06	-12167	5284
RHE_RS04030	R	RHE_RS26015_m1	R	-24	-5	TTTCACCTATAAAGATAGCT	6.5	7.7e-06	-11774	5114
RHE_RS04500	D	RHE_RS26015_m1	D	-219	-200	CGTCACTCCTAGCTACAGTG	10.0	9.8e-07	-13836	6009
RHE_RS10745	R	RHE_RS26015_m1	R	-40	-21	TGTCTCTGGAAGAGACATAG	7.2	5.2e-06	-12167	5284
RHE_RS20070	R	RHE_RS26015_m1	R	-68	-49	CGGCACTTTTAGCGAGATTG	9.6	1.3e-06	-13553	5886
RHE_RS24350	R	RHE_RS26015_m1	R	-48	-29	CTTCACTATCTGCCACATTG	9.0	1.8e-06	-13228	5745
RHE_RS26015	R	RHE_RS26015_m1	R	-44	-25	TGTCGTTATCAGTGACATGA	12.1	2.5e-07	-15202	6602
RHE_RS29975	D	RHE_RS26015_m1	D	-36	-17	CGTCACTAGAAATTTCATCG	6.1	9.5e-06	-11564	5022
RHE_RS04570	R	RHE_RS26015_m2	R	-71	-61	ATCGTGTCACT	10.5	4.4e-06	-12334	5357
RHE_RS04575	D	RHE_RS26015_m2	D	-29	-19	ATCGTGTCACT	10.5	4.4e-06	-12334	5357
RHE_RS13975	R	RHE_RS26015_m2	R	-61	-51	ATTATGTCAAT	10.7	3.0e-06	-12717	5523
RHE_RS13980	D	RHE_RS26015_m2	D	-334	-324	ATTATGTCAAT	10.7	3.0e-06	-12717	5523
RHE_RS14830	R	RHE_RS26015_m2	R	-66	-56	TTTATGTCAAT	10.1	9.0e-06	-11618	5046
RHE_RS01260	R	RHE_RS26015_m3	R	-102	-79	GAGGCTTGATTCCATCATGAGATA	7.0	8.9e-06	-11629	5051
RHE_RS01265	D	RHE_RS26015_m3	D	-61	-38	GAGGCTTGATTCCATCATGAGATA	7.0	8.9e-06	-11629	5051
RHE_RS01870	R	RHE_RS26015_m3	R	-97	-74	AGGACATAAATATATCTTTATATC	10.5	9.5e-07	-13867	6022
RHE_RS26015	R	RHE_RS26015_m3	R	-59	-36	GTGACATGATTTTGGTTAGAGATC	12.2	2.8e-07	-15088	6553
RHE_RS02835	R	RHE_RS26015_m4	R	-69	-50	TCTCATCCATGATGACAATA	5.3	7.4e-06	-11814	5131
RHE_RS04500	D	RHE_RS26015_m4	D	-219	-200	CGTCACTCCTAGCTACAGTG	5.0	8.3e-06	-11699	5081
RHE_RS10745	R	RHE_RS26015_m4	R	-40	-21	TGTCTCTGGAAGAGACATAG	6.4	3.9e-06	-12455	5409
RHE_RS26015	R	RHE_RS26015_m4	R	-44	-25	TGTCGTTATCAGTGACATGA	13.0	7.1e-08	-16461	7149
RHE_RS28550	R	RHE_RS26015_m4	R	-99	-80	GGTCATTGTTATAGACACTA	5.7	5.7e-06	-12075	5244
RHE_RS28550	R	RHE_RS26015_m4	R	-78	-59	TGTCAACATTGAAAACATGA	6.9	2.9e-06	-12751	5538
RHE_RS28555	D	RHE_RS26015_m4	D	-92	-73	TGTCAACATTGAAAACATGA	6.9	2.9e-06	-12751	5538
RHE_RS28555	D	RHE_RS26015_m4	D	-71	-52	GGTCATTGTTATAGACACTA	5.7	5.7e-06	-12075	5244
RHE_RS15405	R	RHE_RS26015_m5	R	-73	-59	TAATATTGACGTAAA	10.7	2.6e-06	-12860	5585
RHE_RS28550	R	RHE_RS26015_m5	R	-100	-86	TGTTATAGACACTAA	10.1	5.3e-06	-12148	5276
RHE_RS28555	D	RHE_RS26015_m5	D	-65	-51	TGTTATAGACACTAA	10.1	5.3e-06	-12148	5276
RHE_RS29200	R	RHE_RS26000_m1	R	-130	-116	CAGATTCGCTCAAGC	8.1	9.0e-06	-11618	5046
RHE_RS29205	D	RHE_RS26000_m1	D	-130	-116	CAGATTCGCTCAAGC	8.1	9.0e-06	-11618	5046
RHE_RS03610	D	RHE_RS26000_m2	D	-98	-85	GAAAGAGGTTAAGA	9.5	7.0e-06	-11870	5155
RHE_RS09990	R	RHE_RS26000_m2	R	-119	-106	CAAAGAGCGTGAGA	9.7	6.1e-06	-12007	5215
RHE_RS09995	D	RHE_RS26000_m2	D	-166	-153	CAAAGAGCGTGAGA	9.7	6.1e-06	-12007	5215
RHE_RS26000	R	RHE_RS26000_m2	R	-69	-56	GCAAGATGTTGATC	11.1	2.2e-06	-13027	5658
RHE_RS01550	R	RHE_RS26000_m3	R	-299	-279	CATTGCCACAATTGGGCAAAT	3.8	9.7e-06	-11543	5013
RHE_RS26000	R	RHE_RS26000_m3	R	-61	-41	AGTTGAGACAATTGGGCAAGA	21.7	4.2e-11	-23893	10377
RHE_RS03275	D	RHE_RS26000_m4	D	-329	-301	CGGGAGTCGAATGGGGAATAGATCCAGCC	6.2	3.2e-06	-12652	5495
RHE_RS13135	D	RHE_RS26000_m4	D	-33	-5	CTAGACAGACTAAGGGAAAAGGACGATCC	8.9	7.1e-07	-14158	6149
RHE_RS26000	R	RHE_RS26000_m4	R	-70	-42	GTTGAGACAATTGGGCAAGATGTTGATCC	26.9	3.9e-14	-30875	13409
RHE_RS03610	D	RHE_RS26000_m5	D	-98	-85	GAAAGAGGTTAAGA	9.5	7.0e-06	-11870	5155
RHE_RS09990	R	RHE_RS26000_m5	R	-119	-106	CAAAGAGCGTGAGA	9.7	6.1e-06	-12007	5215
RHE_RS09995	D	RHE_RS26000_m5	D	-166	-153	CAAAGAGCGTGAGA	9.7	6.1e-06	-12007	5215
RHE_RS26000	R	RHE_RS26000_m5	R	-69	-56	GCAAGATGTTGATC	11.1	2.2e-06	-13027	5658
RHE_RS00340	D	RHE_RS25970_m1	D	-257	-233	TTATTTATAGTGGGAGGAAATATAA	10.0	5.4e-06	-12129	5268
RHE_RS00475	R	RHE_RS25970_m1	R	-96	-72	TATATTTTTTCTGCAAGAAAACAAG	9.7	7.3e-06	-11828	5137
RHE_RS00480	D	RHE_RS25970_m1	D	-97	-73	TATATTTTTTCTGCAAGAAAACAAG	9.7	7.3e-06	-11828	5137
RHE_RS05730	D	RHE_RS25970_m1	D	-95	-71	CAGATGTTAGTAGAATCTAAATTAT	9.4	9.6e-06	-11554	5018
RHE_RS14740	R	RHE_RS25970_m1	R	-157	-133	GTATTTTTCACATCCCTAAAATTCA	10.8	2.4e-06	-12940	5620
RHE_RS15875	D	RHE_RS25970_m1	D	-178	-154	GCTTATTTCGCCTCAAGAAAAATGT	10.1	4.9e-06	-12226	5310
RHE_RS22160	D	RHE_RS25970_m1	D	-135	-111	ATAAATTTTGTTGCAACAAAAATCG	10.5	3.6e-06	-12535	5444
RHE_RS22160	D	RHE_RS25970_m1	D	-134	-110	TAAATTTTGTTGCAACAAAAATCGC	11.6	1.0e-06	-13816	6000
RHE_RS23835	R	RHE_RS25970_m1	R	-99	-75	AAAAATTGCTTGCTAAAAAAACCAG	10.1	4.9e-06	-12226	5310
RHE_RS25970	R	RHE_RS25970_m1	R	-125	-101	CCGATGTTCTCCAAATGAAAATGGT	10.6	3.0e-06	-12717	5523
RHE_RS25970	R	RHE_RS25970_m1	R	-104	-80	AAAATTTGAGTGGCAATAAAACCGA	12.3	4.4e-07	-14636	6357
RHE_RS25970	R	RHE_RS25970_m1	R	-87	-63	TTATATTTGTCCTCACGAAAATTTG	12.1	5.7e-07	-14378	6244
RHE_RS25970	R	RHE_RS25970_m1	R	-66	-42	AAAATTTTCACCACAAGATAATTAT	16.1	1.6e-09	-20253	8796
RHE_RS00340	D	RHE_RS25970_m2	D	-254	-236	TTTATAGTGGGAGGAAATA	10.6	3.1e-06	-12684	5509
RHE_RS04590	D	RHE_RS25970_m2	D	-26	-8	ACTGTCGTCAGGAGAAATT	9.4	9.0e-06	-11618	5046
RHE_RS21975	R	RHE_RS25970_m2	R	-336	-318	CGTATCGTCACGGTAAATC	9.4	9.0e-06	-11618	5046
RHE_RS25970	R	RHE_RS25970_m2	R	-32	-14	CTTTTCGTTTCGGGAAACT	15.3	1.1e-08	-18325	7959
RHE_RS03620	D	RHE_RS25970_m3	D	-29	-13	TGAAAACTTATATTCTC	10.3	4.9e-06	-12226	5310
RHE_RS06825	R	RHE_RS25970_m3	R	-22	-6	TGAAAACCCCCTTTCCC	11.9	9.1e-07	-13910	6041
RHE_RS13745	R	RHE_RS25970_m3	R	-19	-3	CGAAAACTCCATTTCAT	11.8	1.2e-06	-13633	5921
RHE_RS14770	D	RHE_RS25970_m3	D	-101	-85	TGAAAATTTCTTTTCAT	9.9	7.1e-06	-11855	5149
RHE_RS15875	D	RHE_RS25970_m3	D	-228	-212	AGAAAATCCGTTTTCTT	11.4	1.6e-06	-13346	5796
RHE_RS25970	R	RHE_RS25970_m3	R	-111	-95	ATAAAACCGATGTTCTC	11.4	1.6e-06	-13346	5796
RHE_RS25970	R	RHE_RS25970_m3	R	-21	-5	CGTAAACTCCTTTTCGT	14.6	1.1e-08	-18325	7959
RHE_RS29380	R	RHE_RS25970_m3	R	-156	-140	CGAAAACTTATTTTGAC	9.8	7.8e-06	-11761	5108
RHE_RS08240	D	RHE_RS25970_m4	D	-58	-42	GCAAAAACGAGTTTGTT	10.1	4.5e-06	-12311	5347
RHE_RS08455	R	RHE_RS25970_m4	R	-84	-68	ACGACAAGGTGTTTTGG	9.5	7.2e-06	-11841	5143
RHE_RS06405	D	RHE_RS25970_m5	D	-33	-13	ATCGTTTGAGCATGCTAACAG	10.2	5.2e-06	-12167	5284
RHE_RS11475	D	RHE_RS25970_m5	D	-185	-165	ACCGTTCGGGAGGGCTAACAC	10.7	3.3e-06	-12622	5481
RHE_RS20380	R	RHE_RS25970_m5	R	-268	-248	TTTGTTCCGTTTTCGGAACGC	11.3	1.8e-06	-13228	5745
RHE_RS25970	R	RHE_RS25970_m5	R	-37	-17	TTCGTTTCGGGAAACTAACAC	14.7	1.4e-08	-18084	7854
RHE_RS08925	R	RHE_RS25905_m1	R	-41	-30	GTCGTGCATAAA	10.8	3.6e-06	-12535	5444
RHE_RS25905	R	RHE_RS25905_m1	R	-26	-15	CGCGTGCATAAG	10.8	3.6e-06	-12535	5444
RHE_RS11590	R	RHE_RS25905_m2	R	-90	-68	CAGCGTTTTGCGACAACGACATG	8.2	5.8e-06	-12058	5237
RHE_RS17565	R	RHE_RS25905_m2	R	-63	-41	GCGGTTTTTGCGATACCGACATG	14.1	7.9e-08	-16354	7102
RHE_RS23945	R	RHE_RS25905_m2	R	-155	-133	CGCGGTTTTGCGATAACGACACG	8.5	4.5e-06	-12311	5347
RHE_RS24230	R	RHE_RS25905_m2	R	-84	-62	CGGGGTGTCTAGCTGATGACAAT	12.3	3.3e-07	-14924	6481
RHE_RS25905	R	RHE_RS25905_m2	R	-98	-76	CAGGATGCGGCGATAACGACAAT	18.2	1.2e-09	-20541	8921
RHE_RS29535	R	RHE_RS25905_m2	R	-262	-240	CAGGTTCTATCGAGCACGAAATA	7.7	7.4e-06	-11814	5131
RHE_RS00285	R	RHE_RS25905_m3	R	-64	-55	CTACTTATGC	10.8	5.2e-06	-12167	5284
RHE_RS04150	R	RHE_RS25905_m3	R	-98	-89	TTACTTATGA	11.7	2.1e-06	-13074	5678
RHE_RS25905	R	RHE_RS25905_m3	R	-36	-27	CTACTTATCA	12.1	8.9e-07	-13932	6051
RHE_RS06215	D	RHE_RS25905_m4	D	-89	-60	CGCGAAAATTCTGCAAACTGTCAACGAACA	9.4	9.6e-06	-11554	5018
RHE_RS25905	R	RHE_RS25905_m4	R	-206	-177	TGCGATGCAGTTCCAAAGCACTTTCAACGT	9.5	9.6e-06	-11554	5018
RHE_RS06015	R	RHE_RS25905_m5	R	-23	-12	TCCGATTGTCCT	10.6	3.5e-06	-12563	5456
RHE_RS08350	D	RHE_RS25840_m1	D	-101	-80	TACCGCTAGCGTGCGCTATCGG	10.6	2.7e-06	-12822	5569
RHE_RS25840	D	RHE_RS25840_m1	D	-34	-13	ATCCGGCTGCGCTGCCGATCAA	12.9	7.0e-08	-16475	7155
RHE_RS25840	D	RHE_RS25840_m2	D	-15	-4	CAAATGCAAACC	10.8	3.5e-06	-12563	5456
RHE_RS25840	D	RHE_RS25840_m3	D	-19	-8	CGATCAAATGCA	10.8	2.9e-06	-12751	5538
RHE_RS03030	R	RHE_RS25840_m4	R	-170	-153	CCGATCGGCTGCACATCC	12.0	9.1e-07	-13910	6041
RHE_RS25840	D	RHE_RS25840_m5	D	-23	-5	CTGCCGATCAAATGCAAAC	17.9	7.8e-10	-20972	9108
RHE_RS28025	D	RHE_RS25835_m1	D	-38	-22	ACGACGATGCGGGTAAA	7.7	1.9e-06	-13174	5721
RHE_RS21005	R	RHE_RS25835_m2	R	-188	-168	TCGAATTCCCGCATGGTTGCG	0.0	9.6e-06	-11554	5018
RHE_RS25835	D	RHE_RS25835_m2	D	-25	-5	TCGATTGCCCGCATCGTCCCT	25.4	1.3e-12	-27369	11886
RHE_RS28665	D	RHE_RS25835_m3	D	-118	-107	TGTGACTGACCG	8.1	6.9e-06	-11884	5161
RHE_RS17980	R	RHE_RS25835_m4	R	-62	-46	CGCGCGGCGTCATGCAG	10.3	3.0e-06	-12717	5523
RHE_RS25835	D	RHE_RS25835_m4	D	-85	-69	CCCGCGTCGGCATGCTG	18.3	6.1e-10	-21218	9215
RHE_RS11085	D	RHE_RS25835_m5	D	-156	-139	CCCGATCCCGCGCATCGC	10.2	6.7e-06	-11913	5174
RHE_RS16350	D	RHE_RS25835_m5	D	-289	-272	CCCGATGCGCGCCTTCGC	9.9	8.5e-06	-11675	5071
RHE_RS17450	D	RHE_RS25835_m5	D	-143	-126	TACGAACCCCGCGATCGC	11.0	3.1e-06	-12684	5509
RHE_RS25835	D	RHE_RS25835_m5	D	-26	-9	CTCGATTGCCCGCATCGT	13.0	2.1e-07	-15376	6678
RHE_RS01870	R	RHE_RS25725_m1	R	-148	-132	AAAAAAGGCGGCCTTTC	7.1	8.3e-06	-11699	5081
RHE_RS06700	R	RHE_RS25725_m1	R	-109	-93	TGAAAAGCGTGCTATAC	7.8	5.7e-06	-12075	5244
RHE_RS06705	D	RHE_RS25725_m1	D	-58	-42	TGAAAAGCGTGCTATAC	7.8	5.7e-06	-12075	5244
RHE_RS14685	R	RHE_RS25725_m1	R	-36	-20	TATAAAGATATCTTTAT	16.5	1.4e-08	-18084	7854
RHE_RS14830	R	RHE_RS25725_m1	R	-60	-44	CATAAAGATATCTTTAT	10.7	1.1e-06	-13720	5959
RHE_RS20470	D	RHE_RS25725_m1	D	-113	-97	TAAAAGGCCGACTTTTT	8.1	4.9e-06	-12226	5310
RHE_RS25725	D	RHE_RS25725_m1	D	-44	-28	TGTAAAGACAGCTTTTT	17.1	5.4e-09	-19037	8268
RHE_RS26950	D	RHE_RS25725_m1	D	-128	-112	GGAAAAGCTGCCTTTTT	11.6	5.9e-07	-14343	6229
RHE_RS09020	R	RHE_RS25725_m2	R	-99	-87	CTATCGAAAAAAC	12.1	9.0e-07	-13921	6046
RHE_RS09025	D	RHE_RS25725_m2	D	-57	-45	CTATCGAAAAAAC	12.1	9.0e-07	-13921	6046
RHE_RS29775	R	RHE_RS25725_m2	R	-244	-232	CTATCGAAAAAGA	9.0	7.3e-06	-11828	5137
RHE_RS09515	D	RHE_RS25725_m3	D	-49	-24	TTCCTTTACCTCACCAGTGGAAAAGA	10.3	4.1e-06	-12405	5387
RHE_RS12580	R	RHE_RS25725_m3	R	-264	-239	TACCTTTTTCGCAGCTGCAGAAAAAT	10.4	3.8e-06	-12481	5420
RHE_RS12585	D	RHE_RS25725_m3	D	-218	-193	TACCTTTTTCGCAGCTGCAGAAAAAT	10.4	3.8e-06	-12481	5420
RHE_RS15675	D	RHE_RS25725_m3	D	-182	-157	AGCTTTGTGGGCTAGATTAGGAAAAC	10.7	2.9e-06	-12751	5538
RHE_RS19330	R	RHE_RS25725_m3	R	-192	-167	AGCTTTTTGCACCGCAACAGGAAAGG	9.9	5.6e-06	-12093	5252
RHE_RS25725	D	RHE_RS25725_m3	D	-35	-10	AGCTTTTTCTGATAACTGAGAAAAAG	14.6	4.0e-08	-17034	7398
RHE_RS18190	R	RHE_RS25725_m4	R	-127	-104	TACCTTTGAGTAAGAACCGAAAGC	12.0	6.5e-07	-14246	6187
RHE_RS25725	D	RHE_RS25725_m4	D	-60	-37	CGCCTATCATCTCAGCTGTAAAGA	10.4	2.3e-06	-12983	5638
RHE_RS14160	R	RHE_RS25725_m5	R	-55	-34	AAAAACTGCCTCCTTTACACCG	7.7	2.7e-06	-12822	5569
RHE_RS14165	D	RHE_RS25725_m5	D	-93	-72	AAAAACTGCCTCCTTTACACCG	7.7	2.7e-06	-12822	5569
RHE_RS15090	R	RHE_RS25725_m5	R	-322	-301	GGAAAAAGCCTTATCCACAGGC	12.8	1.1e-07	-16023	6959
RHE_RS15450	D	RHE_RS25725_m5	D	-22	-1	CAAAAAACCCGGAATTACAGAT	7.8	2.6e-06	-12860	5585
RHE_RS16660	R	RHE_RS25725_m5	R	-60	-39	GGGAAAAGCAGAATTCAAAGCG	6.1	6.9e-06	-11884	5161
RHE_RS24475	R	RHE_RS25725_m5	R	-163	-142	AAAACAGGCAGGTTTTACGGCT	5.5	9.4e-06	-11575	5027
RHE_RS24480	D	RHE_RS25725_m5	D	-107	-86	AAAACAGGCAGGTTTTACGGCT	5.5	9.4e-06	-11575	5027
RHE_RS00765	R	RHE_RS25605_m1	R	-334	-309	GGTACGTTACAAATCGGTAACAGTTT	13.9	1.5e-08	-18015	7824
RHE_RS07140	D	RHE_RS25605_m1	D	-314	-289	TTATAGTGACGTACGGGTAATGCCTA	2.1	5.9e-06	-12041	5229
RHE_RS14390	R	RHE_RS25605_m1	R	-144	-119	CCGGCATTACCGATTTGTAATATCAG	5.2	1.5e-06	-13410	5824
RHE_RS15695	R	RHE_RS25605_m1	R	-153	-128	CAAGCCTTACTGAAATGTAACGGTGG	3.1	3.8e-06	-12481	5420
RHE_RS25605	D	RHE_RS25605_m1	D	-52	-27	GTGGTGTTACCGGTAAGTAACAGTGC	26.0	1.9e-13	-29292	12721
RHE_RS25605	D	RHE_RS25605_m1	D	-27	-2	CTGTTGTTACCGATCGGTCACATTGA	15.3	6.2e-09	-18899	8208
RHE_RS00765	R	RHE_RS25605_m2	R	-334	-309	GGTACGTTACAAATCGGTAACAGTTT	13.7	1.7e-08	-17890	7770
RHE_RS07140	D	RHE_RS25605_m2	D	-314	-289	TTATAGTGACGTACGGGTAATGCCTA	2.4	5.3e-06	-12148	5276
RHE_RS14390	R	RHE_RS25605_m2	R	-144	-119	CCGGCATTACCGATTTGTAATATCAG	5.4	1.3e-06	-13553	5886
RHE_RS15695	R	RHE_RS25605_m2	R	-153	-128	CAAGCCTTACTGAAATGTAACGGTGG	3.1	4.0e-06	-12429	5398
RHE_RS25605	D	RHE_RS25605_m2	D	-52	-27	GTGGTGTTACCGGTAAGTAACAGTGC	26.4	1.0e-13	-29934	13000
RHE_RS25605	D	RHE_RS25605_m2	D	-27	-2	CTGTTGTTACCGATCGGTCACATTGA	13.8	1.6e-08	-17951	7796
RHE_RS07685	D	RHE_RS25605_m3	D	-125	-111	GTGGAGTTTCCGGTA	8.3	8.9e-06	-11629	5051
RHE_RS12920	R	RHE_RS25605_m3	R	-116	-102	ATGGTGTTACTTGTA	10.6	1.9e-06	-13174	5721
RHE_RS20610	R	RHE_RS25605_m3	R	-58	-44	GTGGCGTTACCGGTC	13.6	1.9e-07	-15476	6721
RHE_RS25605	D	RHE_RS25605_m3	D	-52	-38	GTGGTGTTACCGGTA	18.0	1.1e-10	-22931	9959
RHE_RS25605	D	RHE_RS25605_m3	D	-27	-13	CTGTTGTTACCGATC	15.8	2.3e-08	-17588	7638
RHE_RS26765	D	RHE_RS25605_m3	D	-78	-64	AGGATGTTACCAATC	10.7	1.9e-06	-13174	5721
RHE_RS26875	R	RHE_RS25605_m3	R	-125	-111	GCGTTGTTACCGATA	14.5	7.6e-08	-16393	7119
RHE_RS00765	R	RHE_RS25605_m4	R	-329	-314	GTTACAAATCGGTAAC	14.0	1.1e-07	-16023	6959
RHE_RS15695	R	RHE_RS25605_m4	R	-148	-133	CTTACTGAAATGTAAC	10.8	1.9e-06	-13174	5721
RHE_RS17090	D	RHE_RS25605_m4	D	-123	-108	CATACTTATCTGTATA	9.4	5.2e-06	-12167	5284
RHE_RS25605	D	RHE_RS25605_m4	D	-47	-32	GTTACCGGTAAGTAAC	17.9	7.9e-10	-20959	9102
RHE_RS25605	D	RHE_RS25605_m4	D	-22	-7	GTTACCGATCGGTCAC	13.9	1.2e-07	-15936	6921
RHE_RS08570	D	RHE_RS25605_m5	D	-231	-218	ACACAGAAATGTAG	10.6	5.7e-06	-12075	5244
RHE_RS12170	R	RHE_RS25605_m5	R	-295	-282	AAACATGACTGTGA	10.5	6.3e-06	-11975	5201
RHE_RS12175	D	RHE_RS25605_m5	D	-124	-111	AAACATGACTGTGA	10.5	6.3e-06	-11975	5201
RHE_RS18135	R	RHE_RS25605_m5	R	-186	-173	AAACAGACCTGTTA	12.6	2.5e-07	-15202	6602
RHE_RS25605	D	RHE_RS25605_m5	D	-35	-22	TAACAGTGCTGTTG	11.4	2.2e-06	-13027	5658
RHE_RS27645	D	RHE_RS25605_m5	D	-160	-147	AGACAGACCTGTCA	11.4	2.2e-06	-13027	5658
RHE_RS20315	R	RHE_RS25595_m1	R	-146	-124	TATTGAAAAATAAATGTTATAAT	-1.4	6.1e-06	-12007	5215
RHE_RS20710	R	RHE_RS25595_m1	R	-42	-20	TATTTCCGAAATGTCGATATTTT	1.6	2.0e-06	-13122	5699
RHE_RS20715	D	RHE_RS25595_m1	D	-88	-66	TATTTCCGAAATGTCGATATTTT	1.6	2.0e-06	-13122	5699
RHE_RS23065	D	RHE_RS25595_m1	D	-103	-81	TATATACAAACTGTCGACAAGAC	0.5	3.1e-06	-12684	5509
RHE_RS25595	D	RHE_RS25595_m1	D	-59	-37	TATTGACGATTTATCGATAAAAT	19.4	2.4e-10	-22150	9620
RHE_RS27845	R	RHE_RS25595_m1	R	-52	-30	TCTGCACGTTATACCGATATAAC	-1.9	7.3e-06	-11828	5137
RHE_RS04570	R	RHE_RS25595_m2	R	-74	-43	TGTTACTATCTTTTCGATATCGTGTCACTATC	1.0	1.9e-07	-15476	6721
RHE_RS04575	D	RHE_RS25595_m2	D	-47	-16	TGTTACTATCTTTTCGATATCGTGTCACTATC	1.0	1.9e-07	-15476	6721
RHE_RS16815	D	RHE_RS25595_m2	D	-46	-15	TTGCGATATTAAATCGACAGAATGGTGCCATC	-4.0	1.1e-06	-13720	5959
RHE_RS17765	R	RHE_RS25595_m2	R	-216	-185	TGTTTTTGTTTTGTTCACATATCGATGGCACA	-4.3	1.3e-06	-13553	5886
RHE_RS17770	D	RHE_RS25595_m2	D	-62	-31	TGTTTTTGTTTTGTTCACATATCGATGGCACA	-4.3	1.3e-06	-13553	5886
RHE_RS22160	D	RHE_RS25595_m2	D	-113	-82	TCGCGATTTTTTGTTGACATATTTACAATAAC	4.0	5.8e-08	-16663	7237
RHE_RS25595	D	RHE_RS25595_m2	D	-70	-39	AACTGAAAATTTATTGACGATTTATCGATAAA	-3.4	9.2e-07	-13899	6036
RHE_RS25595	D	RHE_RS25595_m2	D	-59	-28	TATTGACGATTTATCGATAAAATGTCAACGTT	24.2	1.5e-12	-27226	11824
RHE_RS28665	D	RHE_RS25595_m2	D	-100	-69	TGTCAACAGCGTGTCGACAAAGTCAAGCGGAA	-6.7	2.8e-06	-12786	5553
RHE_RS05790	D	RHE_RS25595_m3	D	-260	-248	ATGTCTATAAAAT	10.1	2.2e-06	-13027	5658
RHE_RS09500	R	RHE_RS25595_m3	R	-165	-153	ACCTCGATAAGAT	9.7	2.8e-06	-12786	5553
RHE_RS13975	R	RHE_RS25595_m3	R	-66	-54	ATGTCAATAATAC	9.1	4.1e-06	-12405	5387
RHE_RS13980	D	RHE_RS25595_m3	D	-331	-319	ATGTCAATAATAC	9.1	4.1e-06	-12405	5387
RHE_RS23570	D	RHE_RS25595_m3	D	-102	-90	TTATCGATAACAT	8.2	7.0e-06	-11870	5155
RHE_RS23585	D	RHE_RS25595_m3	D	-54	-42	TTATCGATAACAT	8.2	7.0e-06	-11870	5155
RHE_RS25595	D	RHE_RS25595_m3	D	-49	-37	TTATCGATAAAAT	14.0	2.1e-07	-15376	6678
RHE_RS00575	R	RHE_RS25595_m4	R	-140	-130	AAGAGGGAGCG	9.3	9.3e-06	-11585	5032
RHE_RS04500	D	RHE_RS25595_m4	D	-137	-127	ATGAGGGGGCC	10.3	5.2e-06	-12167	5284
RHE_RS05615	D	RHE_RS25595_m4	D	-77	-67	ATGAGGGGGCC	10.3	5.2e-06	-12167	5284
RHE_RS13740	D	RHE_RS25595_m4	D	-223	-213	ATGAGGGAGGT	9.3	9.3e-06	-11585	5032
RHE_RS14020	R	RHE_RS25595_m4	R	-145	-135	TGGAGGGAGCC	10.1	6.1e-06	-12007	5215
RHE_RS15980	D	RHE_RS25595_m4	D	-49	-39	ATGAGGGGGCC	10.3	5.2e-06	-12167	5284
RHE_RS18145	D	RHE_RS25595_m4	D	-172	-162	ATGAGGGGGCC	10.3	5.2e-06	-12167	5284
RHE_RS18655	R	RHE_RS25595_m4	R	-179	-169	ATGAGGGGGCC	10.3	5.2e-06	-12167	5284
RHE_RS08535	D	RHE_RS25595_m5	D	-103	-90	CGGGAGGTGGGACG	13.3	1.9e-07	-15476	6721
RHE_RS12560	R	RHE_RS25560_m1	R	-95	-64	CGGTCATTGCGCCCCCTTCCCGTCCGTCATGC	2.3	1.0e-06	-13816	6000
RHE_RS16870	D	RHE_RS25560_m1	D	-308	-277	CTGTCGCATTTATCTGGCGTCAAACGTCATTG	3.5	6.1e-07	-14310	6215
RHE_RS25560	D	RHE_RS25560_m1	D	-66	-35	CTGTCACACCGGCCCGGTTTCATTCGTCATTG	28.3	4.0e-14	-30850	13398
RHE_RS11975	D	RHE_RS25560_m2	D	-304	-272	GCCGGACGCCCGTAGCTGCCCCGACGTCACAGC	-5.3	2.9e-06	-12751	5538
RHE_RS15950	R	RHE_RS25560_m2	R	-84	-52	CTAGGACGTACCGGACTTCGCCGCTCCGACAGC	-2.8	1.1e-06	-13720	5959
RHE_RS10345	D	RHE_RS25560_m3	D	-224	-203	CTTCGCTATCTCTATGACGAAC	7.9	5.6e-06	-12093	5252
RHE_RS25560	D	RHE_RS25560_m3	D	-96	-75	ATACGTTTAGGGTGCGACGATC	10.5	1.3e-06	-13553	5886
RHE_RS25560	D	RHE_RS25560_m3	D	-45	-24	ATTCGTCATTGATTTGACGGAA	15.0	4.7e-08	-16873	7328
RHE_RS10345	D	RHE_RS25560_m4	D	-224	-203	CTTCGCTATCTCTATGACGAAC	4.9	4.5e-06	-12311	5347
RHE_RS15165	D	RHE_RS25560_m4	D	-76	-55	ATGCGTCAACCGCTTGACGCGG	6.3	2.3e-06	-12983	5638
RHE_RS25560	D	RHE_RS25560_m4	D	-45	-24	ATTCGTCATTGATTTGACGGAA	16.9	6.4e-09	-18867	8194
RHE_RS20585	R	RHE_RS25560_m5	R	-240	-230	GTTCCGTCACC	11.6	1.4e-06	-13479	5854
RHE_RS12775	R	RHE_RS25540_m1	R	-69	-57	AATGTCAATCGCT	9.3	7.7e-06	-11774	5114
RHE_RS25540	R	RHE_RS25540_m1	R	-57	-45	GCTGTCAATCATA	13.2	4.6e-07	-14592	6337
RHE_RS25545	D	RHE_RS25540_m1	D	-158	-146	GCTGTCAATCATA	13.2	4.6e-07	-14592	6337
RHE_RS25540	R	RHE_RS25540_m2	R	-121	-99	TTTGATCGTTTTCGATTGACAAG	22.7	4.8e-12	-26062	11319
RHE_RS25545	D	RHE_RS25540_m2	D	-104	-82	TTTGATCGTTTTCGATTGACAAG	22.7	4.8e-12	-26062	11319
RHE_RS10510	R	RHE_RS25540_m3	R	-109	-86	CCTGTCAAGCGCATTTGCTAAAAA	1.3	9.4e-06	-11575	5027
RHE_RS10515	D	RHE_RS25540_m3	D	-170	-147	CCTGTCAAGCGCATTTGCTAAAAA	1.3	9.4e-06	-11575	5027
RHE_RS19300	R	RHE_RS25540_m3	R	-62	-39	GATGTCCATCATCAATAAGCAACA	3.2	4.3e-06	-12357	5367
RHE_RS19305	D	RHE_RS25540_m3	D	-92	-69	GATGTCCATCATCAATAAGCAACA	3.2	4.3e-06	-12357	5367
RHE_RS19905	R	RHE_RS25540_m3	R	-138	-115	ATTTTCAATCGTTTAGATGCAAAA	1.8	7.8e-06	-11761	5108
RHE_RS23585	D	RHE_RS25540_m3	D	-55	-32	GTTATCGATAACATATTTTCATCA	1.9	7.8e-06	-11761	5108
RHE_RS25540	R	RHE_RS25540_m3	R	-68	-45	GCTGTCAATCATAAACGATCATAA	25.3	4.3e-13	-28475	12367
RHE_RS25545	D	RHE_RS25540_m3	D	-158	-135	GCTGTCAATCATAAACGATCATAA	25.3	4.3e-13	-28475	12367
RHE_RS30975	R	RHE_RS25540_m3	R	-245	-222	CTTGTCCATCATGCTGGATCATCT	1.3	9.4e-06	-11575	5027
RHE_RS02355	R	RHE_RS25540_m4	R	-325	-316	TGGGAGGAGT	10.5	2.0e-06	-13122	5699
RHE_RS02695	D	RHE_RS25540_m4	D	-132	-123	TGGGAGGATG	9.9	9.8e-06	-11533	5009
RHE_RS06955	R	RHE_RS25540_m4	R	-323	-314	TGGGAGGATG	9.9	9.8e-06	-11533	5009
RHE_RS06960	D	RHE_RS25540_m4	D	-246	-237	TGGGAGGATG	9.9	9.8e-06	-11533	5009
RHE_RS08160	R	RHE_RS25540_m4	R	-161	-152	TGGGAGGAGC	10.9	8.7e-07	-13955	6060
RHE_RS14695	R	RHE_RS25540_m4	R	-222	-213	TGGGAGGATC	10.3	4.7e-06	-12268	5328
RHE_RS19030	D	RHE_RS25540_m4	D	-14	-5	TGGGAGGAGC	10.9	8.7e-07	-13955	6060
RHE_RS19035	D	RHE_RS25540_m4	D	-14	-5	TGGGAGGATG	9.9	9.8e-06	-11533	5009
RHE_RS23585	D	RHE_RS25540_m4	D	-16	-7	TGGGAGGAGC	10.9	8.7e-07	-13955	6060
RHE_RS25540	R	RHE_RS25540_m4	R	-198	-189	TGGGAGGATG	9.9	9.8e-06	-11533	5009
RHE_RS25545	D	RHE_RS25540_m4	D	-14	-5	TGGGAGGATG	9.9	9.8e-06	-11533	5009
RHE_RS26285	D	RHE_RS25540_m4	D	-86	-77	TGGGAGGAGC	10.9	8.7e-07	-13955	6060
RHE_RS26890	D	RHE_RS25540_m4	D	-16	-7	TGGGAGGAGG	10.4	2.8e-06	-12786	5553
RHE_RS27970	D	RHE_RS25540_m4	D	-45	-36	TGGGAGGATG	9.9	9.8e-06	-11533	5009
RHE_RS28025	D	RHE_RS25540_m4	D	-17	-8	TAGGAGGAGT	10.2	5.0e-06	-12206	5301
RHE_RS20595	D	RHE_RS25540_m5	D	-69	-52	TTTGTCAATGACACACGA	5.7	8.5e-06	-11675	5071
RHE_RS23365	R	RHE_RS25540_m5	R	-200	-183	AAAGTCAATAAAAAATGA	5.9	7.7e-06	-11774	5114
RHE_RS23370	D	RHE_RS25540_m5	D	-159	-142	AAAGTCAATAAAAAATGA	5.9	7.7e-06	-11774	5114
RHE_RS25540	R	RHE_RS25540_m5	R	-62	-45	GCTGTCAATCATAAACGA	18.8	9.8e-10	-20743	9009
RHE_RS25545	D	RHE_RS25540_m5	D	-158	-141	GCTGTCAATCATAAACGA	18.8	9.8e-10	-20743	9009
RHE_RS06580	D	RHE_RS25455_m1	D	-44	-32	GGTCTATTCAAAC	8.5	9.0e-06	-11618	5046
RHE_RS09565	R	RHE_RS25455_m1	R	-180	-168	TGTCTGGCCAATA	9.3	6.0e-06	-12024	5222
RHE_RS09565	R	RHE_RS25455_m1	R	-107	-95	GTTCTGTTCAAAC	10.7	2.3e-06	-12983	5638
RHE_RS09570	D	RHE_RS25455_m1	D	-114	-102	GTTCTGTTCAAAC	10.7	2.3e-06	-12983	5638
RHE_RS09570	D	RHE_RS25455_m1	D	-41	-29	TGTCTGGCCAATA	9.3	6.0e-06	-12024	5222
RHE_RS25445	R	RHE_RS25455_m1	R	-45	-33	TGTCTCGTCAAAT	9.9	4.0e-06	-12429	5398
RHE_RS01550	R	RHE_RS25455_m2	R	-70	-58	TCTGTTAAAAAGT	9.7	9.1e-06	-11607	5041
RHE_RS03720	D	RHE_RS25455_m2	D	-63	-51	ATTGTTCAAAACT	9.9	7.6e-06	-11787	5119
RHE_RS05945	R	RHE_RS25455_m2	R	-295	-283	ACTGTTTTAATAC	9.9	7.6e-06	-11787	5119
RHE_RS05950	D	RHE_RS25455_m2	D	-179	-167	ACTGTTTTAATAC	9.9	7.6e-06	-11787	5119
RHE_RS14375	R	RHE_RS25455_m2	R	-28	-16	TCCGTTCAAAACT	10.3	5.2e-06	-12167	5284
RHE_RS15185	D	RHE_RS25455_m2	D	-240	-228	TATGTTCTAATAT	10.1	6.4e-06	-11959	5194
RHE_RS00700	R	RHE_RS25455_m3	R	-128	-106	GGGTCTGGTAGAAAATGCCCGGA	1.9	9.5e-06	-11564	5022
RHE_RS00705	D	RHE_RS25455_m3	D	-84	-62	GGGTCTGGTAGAAAATGCCCGGA	1.9	9.5e-06	-11564	5022
RHE_RS03980	D	RHE_RS25455_m3	D	-153	-131	TTCGCCGATCATTATTGAACAGA	2.3	7.7e-06	-11774	5114
RHE_RS06875	R	RHE_RS25455_m3	R	-170	-148	GTCTCTTGTCAAAATGGTCCAAA	3.7	4.2e-06	-12380	5377
RHE_RS06880	D	RHE_RS25455_m3	D	-64	-42	GTCTCTTGTCAAAATGGTCCAAA	3.7	4.2e-06	-12380	5377
RHE_RS12205	D	RHE_RS25455_m3	D	-36	-14	AAGACTGTTCAACACTGAACAAT	4.5	2.9e-06	-12751	5538
RHE_RS25455	R	RHE_RS25455_m3	R	-63	-41	CGATCTGCAGATATCTAAACAAT	3.8	4.0e-06	-12429	5398
RHE_RS26280	D	RHE_RS25455_m3	D	-110	-88	TTGTCTGTTTATAGACAAACAGA	12.1	6.3e-08	-16580	7201
RHE_RS26720	D	RHE_RS25455_m3	D	-93	-71	GAGTCTGTACGCTATTGCACAAT	3.8	4.0e-06	-12429	5398
RHE_RS26730	R	RHE_RS25455_m3	R	-99	-77	CCAATTGTACGGAACTGAACAGT	3.0	5.7e-06	-12075	5244
RHE_RS00700	R	RHE_RS25455_m4	R	-128	-106	GGGTCTGGTAGAAAATGCCCGGA	1.9	9.5e-06	-11564	5022
RHE_RS00705	D	RHE_RS25455_m4	D	-84	-62	GGGTCTGGTAGAAAATGCCCGGA	1.9	9.5e-06	-11564	5022
RHE_RS03980	D	RHE_RS25455_m4	D	-153	-131	TTCGCCGATCATTATTGAACAGA	2.3	7.7e-06	-11774	5114
RHE_RS06875	R	RHE_RS25455_m4	R	-170	-148	GTCTCTTGTCAAAATGGTCCAAA	3.7	4.2e-06	-12380	5377
RHE_RS06880	D	RHE_RS25455_m4	D	-64	-42	GTCTCTTGTCAAAATGGTCCAAA	3.7	4.2e-06	-12380	5377
RHE_RS12205	D	RHE_RS25455_m4	D	-36	-14	AAGACTGTTCAACACTGAACAAT	4.5	2.9e-06	-12751	5538
RHE_RS25455	R	RHE_RS25455_m4	R	-63	-41	CGATCTGCAGATATCTAAACAAT	3.8	4.0e-06	-12429	5398
RHE_RS26280	D	RHE_RS25455_m4	D	-110	-88	TTGTCTGTTTATAGACAAACAGA	12.1	6.3e-08	-16580	7201
RHE_RS26720	D	RHE_RS25455_m4	D	-93	-71	GAGTCTGTACGCTATTGCACAAT	3.8	4.0e-06	-12429	5398
RHE_RS26730	R	RHE_RS25455_m4	R	-99	-77	CCAATTGTACGGAACTGAACAGT	3.0	5.7e-06	-12075	5244
RHE_RS00415	R	RHE_RS25455_m5	R	-265	-255	GAGGAGGAAAA	9.7	6.6e-06	-11928	5180
RHE_RS26635	D	RHE_RS25455_m5	D	-34	-24	TAGGAGGAAGC	10.1	2.5e-06	-12899	5602
RHE_RS28420	R	RHE_RS25455_m5	R	-338	-328	GGGGAGGAAAA	10.2	2.0e-06	-13122	5699
RHE_RS28425	D	RHE_RS25455_m5	D	-14	-4	GGGGAGGAAAA	10.2	2.0e-06	-13122	5699
RHE_RS00300	R	RHE_RS25290_m1	R	-250	-226	TACAAAAATGTCAAAAAACTTTTGT	5.2	1.3e-06	-13553	5886
RHE_RS25290	D	RHE_RS25290_m1	D	-58	-34	TGCTAAGATGTCAGACCAATTTCAT	23.3	1.1e-11	-25233	10959
RHE_RS04435	D	RHE_RS25290_m2	D	-70	-60	CCCTTGACCCC	10.1	3.9e-06	-12455	5409
RHE_RS25290	D	RHE_RS25290_m2	D	-86	-76	CGCTTGACGCC	9.7	8.3e-06	-11699	5081
RHE_RS25290	D	RHE_RS25290_m3	D	-55	-35	TAAGATGTCAGACCAATTTCA	25.2	1.1e-12	-27536	11959
RHE_RS00300	R	RHE_RS25290_m4	R	-250	-226	TACAAAAATGTCAAAAAACTTTTGT	-3.3	8.4e-06	-11687	5076
RHE_RS11865	R	RHE_RS25290_m4	R	-148	-124	GGCTGACATATCAGATCAAGTTCAA	-3.7	9.8e-06	-11533	5009
RHE_RS25290	D	RHE_RS25290_m4	D	-58	-34	TGCTAAGATGTCAGACCAATTTCAT	27.3	1.7e-13	-29403	12770
RHE_RS25370	R	RHE_RS25290_m4	R	-110	-86	CGTTAGAATGTCATTCCATTTCGAG	-2.2	5.3e-06	-12148	5276
RHE_RS14820	D	RHE_RS25290_m5	D	-27	-18	TAGGGAACGC	10.1	8.6e-06	-11664	5066
RHE_RS07330	R	RHE_RS25185_m1	R	-161	-148	AAATGCGAAATACT	11.7	9.8e-07	-13836	6009
RHE_RS16220	R	RHE_RS25185_m1	R	-68	-55	AAATGTGAAAGAGT	9.8	8.1e-06	-11724	5092
RHE_RS25060	R	RHE_RS25185_m1	R	-54	-41	AAATGTCAAATAAC	9.9	7.3e-06	-11828	5137
RHE_RS25065	D	RHE_RS25185_m1	D	-111	-98	AAATGTCAAATAAC	9.9	7.3e-06	-11828	5137
RHE_RS25185	D	RHE_RS25185_m1	D	-87	-74	CAATGCGAAATAAT	13.1	1.5e-07	-15713	6824
RHE_RS25185	D	RHE_RS25185_m2	D	-106	-80	TAGCATTGAGGCTTGCAATCAATGCGA	13.5	1.5e-07	-15713	6824
RHE_RS25185	D	RHE_RS25185_m2	D	-32	-6	AAGCATGGATGGGGGTGGTTCATGTTG	14.6	4.1e-08	-17010	7387
RHE_RS09720	D	RHE_RS25185_m3	D	-110	-88	AATCGTGCTAAAAAACCATGGTG	8.9	7.7e-06	-11774	5114
RHE_RS17835	D	RHE_RS25185_m3	D	-24	-2	CATTATGTTATAAAAATATAACA	12.2	6.6e-07	-14231	6180
RHE_RS24755	R	RHE_RS25185_m3	R	-114	-92	ATTCATGACAAAATATCAGGAAT	9.9	3.7e-06	-12507	5432
RHE_RS24760	D	RHE_RS25185_m3	D	-31	-9	ATTCATGACAAAATATCAGGAAT	9.9	3.7e-06	-12507	5432
RHE_RS25185	D	RHE_RS25185_m3	D	-119	-97	CATTATGTCAAAATAGCATTGAG	11.6	1.0e-06	-13816	6000
RHE_RS25185	D	RHE_RS25185_m3	D	-45	-23	GCTCATGCTTCCAAAGCATGGAT	9.9	3.7e-06	-12507	5432
RHE_RS11170	R	RHE_RS25185_m4	R	-142	-129	TTATGTCAAAGATC	9.8	8.2e-06	-11711	5086
RHE_RS11265	D	RHE_RS25185_m4	D	-40	-27	CTATGTGACATACG	9.8	8.2e-06	-11711	5086
RHE_RS25060	R	RHE_RS25185_m4	R	-54	-41	AAATGTCAAATAAC	10.5	3.8e-06	-12481	5420
RHE_RS25065	D	RHE_RS25185_m4	D	-111	-98	AAATGTCAAATAAC	10.5	3.8e-06	-12481	5420
RHE_RS25185	D	RHE_RS25185_m4	D	-117	-104	TTATGTCAAAATAG	12.9	1.2e-07	-15936	6921
RHE_RS25185	D	RHE_RS25185_m4	D	-87	-74	CAATGCGAAATAAT	9.8	9.1e-06	-11607	5041
RHE_RS30310	D	RHE_RS25185_m4	D	-113	-100	GTATGTCAAAAATA	10.9	2.4e-06	-12940	5620
RHE_RS25185	D	RHE_RS25185_m5	D	-83	-66	GCGAAATAATAATCTACT	14.8	9.4e-09	-18483	8027
RHE_RS29945	D	RHE_RS25185_m5	D	-91	-74	GTGAAACTCTTATCCATG	10.7	2.9e-06	-12751	5538
RHE_RS03515	R	RHE_RS25060_m1	R	-73	-57	CAAATAGCGCTCAAAGC	7.7	2.5e-06	-12899	5602
RHE_RS03520	D	RHE_RS25060_m1	D	-245	-229	CAAATAGCGCTCAAAGC	7.7	2.5e-06	-12899	5602
RHE_RS10285	R	RHE_RS25060_m1	R	-150	-134	CATATAAAGCACGACGT	5.0	8.9e-06	-11629	5051
RHE_RS10795	D	RHE_RS25060_m1	D	-159	-143	CAAATAAAGAACAAAAT	8.4	1.7e-06	-13285	5770
RHE_RS15885	R	RHE_RS25060_m1	R	-78	-62	TATTTATCGCACATTTT	6.5	4.6e-06	-12289	5337
RHE_RS15890	D	RHE_RS25060_m1	D	-97	-81	TATTTATCGCACATTTT	6.5	4.6e-06	-12289	5337
RHE_RS20315	R	RHE_RS25060_m1	R	-195	-179	CAATAAGCGCACAAATA	10.9	4.1e-07	-14707	6387
RHE_RS24455	R	RHE_RS25060_m1	R	-31	-15	CTACAATCGCACGAACT	6.0	5.6e-06	-12093	5252
RHE_RS25060	R	RHE_RS25060_m1	R	-63	-47	CAAATAACGCACAAATT	17.7	3.3e-09	-19529	8481
RHE_RS25065	D	RHE_RS25060_m1	D	-105	-89	CAAATAACGCACAAATT	17.7	3.3e-09	-19529	8481
RHE_RS02955	D	RHE_RS25060_m2	D	-78	-56	GATTGTGTAGTTTCCGCCCAAAT	6.1	8.0e-06	-11736	5097
RHE_RS06015	R	RHE_RS25060_m2	R	-94	-72	AATTGTGCGTTAGTAAAACACTA	8.7	1.8e-06	-13228	5745
RHE_RS06465	R	RHE_RS25060_m2	R	-39	-17	GTTCGTTTTTAATATGAACGAAC	5.8	9.4e-06	-11575	5027
RHE_RS18560	D	RHE_RS25060_m2	D	-38	-16	ATTTGTTCAACATTCCAAAACAC	6.9	5.5e-06	-12111	5260
RHE_RS20315	R	RHE_RS25060_m2	R	-194	-172	GACCGAGCAATAAGCGCACAAAT	6.4	7.2e-06	-11841	5143
RHE_RS25060	R	RHE_RS25060_m2	R	-44	-22	CTATGTGCGATATACGAACAAAT	18.6	1.0e-09	-20723	9000
RHE_RS25065	D	RHE_RS25060_m2	D	-130	-108	CTATGTGCGATATACGAACAAAT	18.6	1.0e-09	-20723	9000
RHE_RS27240	R	RHE_RS25060_m2	R	-55	-33	TTTTGTGCGTATCGCGCAGAATT	7.9	2.9e-06	-12751	5538
RHE_RS03515	R	RHE_RS25060_m3	R	-72	-57	CAAATAGCGCTCAAAG	10.1	8.1e-07	-14026	6092
RHE_RS03520	D	RHE_RS25060_m3	D	-245	-230	CAAATAGCGCTCAAAG	10.1	8.1e-07	-14026	6092
RHE_RS10795	D	RHE_RS25060_m3	D	-159	-144	CAAATAAAGAACAAAA	6.8	4.5e-06	-12311	5347
RHE_RS15885	R	RHE_RS25060_m3	R	-77	-62	TATTTATCGCACATTT	5.3	9.2e-06	-11596	5036
RHE_RS15890	D	RHE_RS25060_m3	D	-97	-82	TATTTATCGCACATTT	5.3	9.2e-06	-11596	5036
RHE_RS20315	R	RHE_RS25060_m3	R	-194	-179	CAATAAGCGCACAAAT	10.3	7.2e-07	-14144	6143
RHE_RS25060	R	RHE_RS25060_m3	R	-62	-47	CAAATAACGCACAAAT	16.7	1.0e-08	-18421	8000
RHE_RS25065	D	RHE_RS25060_m3	D	-105	-90	CAAATAACGCACAAAT	16.7	1.0e-08	-18421	8000
RHE_RS13960	R	RHE_RS25060_m4	R	-167	-157	TCGCGCACAAA	10.3	6.4e-06	-11959	5194
RHE_RS13965	D	RHE_RS25060_m4	D	-39	-29	TCGCGCACAAA	10.3	6.4e-06	-11959	5194
RHE_RS20315	R	RHE_RS25060_m4	R	-193	-183	AAGCGCACAAA	10.0	8.4e-06	-11687	5076
RHE_RS25060	R	RHE_RS25060_m4	R	-61	-51	TAACGCACAAA	13.0	1.3e-07	-15856	6886
RHE_RS25065	D	RHE_RS25060_m4	D	-101	-91	TAACGCACAAA	13.0	1.3e-07	-15856	6886
RHE_RS10285	R	RHE_RS25060_m5	R	-148	-131	GTTCATATAAAGCACGAC	9.9	4.2e-06	-12380	5377
RHE_RS10425	D	RHE_RS25060_m5	D	-34	-17	ATGTGTATTATGCACATA	8.9	8.3e-06	-11699	5081
RHE_RS25060	R	RHE_RS25060_m5	R	-61	-44	TGTCAAATAACGCACAAA	9.9	3.9e-06	-12455	5409
RHE_RS25060	R	RHE_RS25060_m5	R	-43	-26	GTGCGATATACGAACAAA	10.5	2.6e-06	-12860	5585
RHE_RS25065	D	RHE_RS25060_m5	D	-126	-109	GTGCGATATACGAACAAA	10.5	2.6e-06	-12860	5585
RHE_RS25065	D	RHE_RS25060_m5	D	-108	-91	TGTCAAATAACGCACAAA	9.9	3.9e-06	-12455	5409
RHE_RS02340	R	RHE_RS25040_m1	R	-82	-67	ATGATGTGCATCATTA	9.4	5.3e-06	-12148	5276
RHE_RS05255	R	RHE_RS25040_m1	R	-16	-1	ATGATATAAATTATAC	9.1	6.7e-06	-11913	5174
RHE_RS09730	D	RHE_RS25040_m1	D	-169	-154	GTGATATATATTAGCA	9.1	7.1e-06	-11855	5149
RHE_RS14475	D	RHE_RS25040_m1	D	-169	-154	ACGATAAACATCGTTA	9.7	4.6e-06	-12289	5337
RHE_RS15375	D	RHE_RS25040_m1	D	-378	-363	ACGATATAAATCGTTA	10.6	2.2e-06	-13027	5658
RHE_RS24400	R	RHE_RS25040_m1	R	-48	-33	TGTATATACATAATAA	8.8	8.3e-06	-11699	5081
RHE_RS24620	D	RHE_RS25040_m1	D	-91	-76	GCTAGATACATCAATA	8.9	7.7e-06	-11774	5114
RHE_RS25040	R	RHE_RS25040_m1	R	-42	-27	CTGATGTATATCAGAA	10.4	2.5e-06	-12899	5602
RHE_RS29075	D	RHE_RS25040_m1	D	-151	-136	TTGATCTACATCAACA	10.0	3.7e-06	-12507	5432
RHE_RS30890	R	RHE_RS25040_m1	R	-106	-91	TTGATCTACATCAACA	10.0	3.7e-06	-12507	5432
RHE_RS20710	R	RHE_RS25040_m2	R	-41	-19	CTATTTCCGAAATGTCGATATTT	7.6	4.5e-06	-12311	5347
RHE_RS20715	D	RHE_RS25040_m2	D	-89	-67	CTATTTCCGAAATGTCGATATTT	7.6	4.5e-06	-12311	5347
RHE_RS25040	R	RHE_RS25040_m2	R	-54	-32	GTATATCAGAATTTATGATGCAT	21.7	2.3e-11	-24496	10638
RHE_RS25040	R	RHE_RS25040_m2	R	-35	-13	TAATTTCCGGAGTACTGATGTAT	7.2	5.7e-06	-12075	5244
RHE_RS28710	D	RHE_RS25040_m2	D	-113	-91	CGATATCAGAGCTTATGAAATAA	9.9	1.2e-06	-13633	5921
RHE_RS32435	D	RHE_RS25040_m2	D	-70	-48	GGTAATCGTTATTTCGGATATAC	7.2	5.7e-06	-12075	5244
RHE_RS07050	R	RHE_RS25040_m3	R	-106	-96	CTATCGGAATT	9.6	8.8e-06	-11641	5056
RHE_RS07290	R	RHE_RS25040_m3	R	-63	-53	ATATCGGAAAC	9.7	7.5e-06	-11801	5125
RHE_RS17305	R	RHE_RS25040_m3	R	-329	-319	ACATCGGAAAT	9.9	4.7e-06	-12268	5328
RHE_RS03970	D	RHE_RS25040_m4	D	-87	-78	CGCTGATATC	10.2	6.4e-06	-11959	5194
RHE_RS04950	R	RHE_RS25040_m4	R	-187	-178	CGCTGATATA	10.1	9.8e-06	-11533	5009
RHE_RS04955	D	RHE_RS25040_m4	D	-92	-83	CGCTGATATA	10.1	9.8e-06	-11533	5009
RHE_RS14375	R	RHE_RS25040_m4	R	-135	-126	CGCTGATATC	10.2	6.4e-06	-11959	5194
RHE_RS24110	R	RHE_RS25040_m4	R	-223	-214	CGCTGATATA	10.1	9.8e-06	-11533	5009
RHE_RS00855	D	RHE_RS25040_m5	D	-90	-62	ATTGATATAGACAAGTATACAAGCTATAC	6.4	6.3e-06	-11975	5201
RHE_RS25040	R	RHE_RS25040_m5	R	-54	-26	ACTGATGTATATCAGAATTTATGATGCAT	19.4	4.2e-10	-21591	9377
RHE_RS16200	R	RHE_RS24980_m2	R	-261	-232	AAAGTATTACTTTTGATGGAGCGCAGTGGG	11.2	4.8e-07	-14549	6319
RHE_RS16205	D	RHE_RS24980_m2	D	-44	-15	AAAGTATTACTTTTGATGGAGCGCAGTGGG	11.2	4.8e-07	-14549	6319
RHE_RS17030	D	RHE_RS24980_m2	D	-54	-25	AATGTGGCAGGCTAGAGTGGCGCTCGTGGT	10.6	7.4e-07	-14117	6131
RHE_RS17030	D	RHE_RS24980_m2	D	-41	-12	AGAGTGGCGCTCGTGGTCTTGCGTTGTGTA	8.6	3.0e-06	-12717	5523
RHE_RS03180	D	RHE_RS24980_m3	D	-24	-14	TGGGAGGAGAG	9.8	4.1e-06	-12405	5387
RHE_RS09130	R	RHE_RS24980_m3	R	-215	-205	GAGGAGGAGAA	9.6	7.4e-06	-11814	5131
RHE_RS14640	D	RHE_RS24980_m3	D	-16	-6	TAGGAGGAGAT	9.8	4.1e-06	-12405	5387
RHE_RS18380	D	RHE_RS24980_m3	D	-14	-4	TGGGAGGAGAA	10.1	2.0e-06	-13122	5699
RHE_RS19030	D	RHE_RS24980_m3	D	-14	-4	TGGGAGGAGCA	9.9	3.3e-06	-12622	5481
RHE_RS23585	D	RHE_RS24980_m3	D	-16	-6	TGGGAGGAGCC	9.7	5.9e-06	-12041	5229
RHE_RS26890	D	RHE_RS24980_m3	D	-16	-6	TGGGAGGAGGG	9.8	4.1e-06	-12405	5387
RHE_RS28025	D	RHE_RS24980_m3	D	-67	-57	GTGGAGGAGAC	10.0	2.6e-06	-12860	5585
RHE_RS29380	R	RHE_RS24980_m3	R	-335	-325	GGGGAGGAGAC	10.4	9.4e-07	-13877	6027
RHE_RS11950	R	RHE_RS24980_m4	R	-313	-298	TGGTAGTGTTTTGATA	10.6	3.3e-06	-12622	5481
RHE_RS11955	D	RHE_RS24980_m4	D	-171	-156	TGGTAGTGTTTTGATA	10.6	3.3e-06	-12622	5481
RHE_RS03025	R	RHE_RS24980_m5	R	-86	-77	ATCAAAAAAG	11.3	2.1e-06	-13074	5678
RHE_RS06895	D	RHE_RS24980_m5	D	-340	-331	GTCAAAAAAG	12.1	9.3e-07	-13888	6032
RHE_RS07330	R	RHE_RS24980_m5	R	-284	-275	GCCAAAAAAG	10.9	4.3e-06	-12357	5367
RHE_RS12350	D	RHE_RS24980_m5	D	-41	-32	GACAAAAAAG	10.2	6.5e-06	-11944	5187
RHE_RS13730	R	RHE_RS24980_m5	R	-47	-38	GCCAAAAAAG	10.9	4.3e-06	-12357	5367
RHE_RS14475	D	RHE_RS24980_m5	D	-223	-214	CTCAAAAAAG	9.9	8.4e-06	-11687	5076
RHE_RS19750	R	RHE_RS24980_m5	R	-94	-85	GTCAAAAAAG	12.1	9.3e-07	-13888	6032
RHE_RS27600	D	RHE_RS24980_m5	D	-124	-115	GCCAAAAAAG	10.9	4.3e-06	-12357	5367
RHE_RS13135	D	RHE_RS24850_m1	D	-280	-260	ATATCGGCCATGCCACAATAA	10.6	3.3e-06	-12622	5481
RHE_RS24850	D	RHE_RS24850_m1	D	-39	-19	TTATCGCCAGTCTGACAAATT	15.3	2.3e-09	-19890	8638
RHE_RS25595	D	RHE_RS24850_m1	D	-49	-29	TTATCGATAAAATGTCAACGT	10.9	2.4e-06	-12940	5620
RHE_RS04720	D	RHE_RS24850_m4	D	-295	-276	CGCGACACTCATAGGCCAAA	9.7	3.2e-06	-12652	5495
RHE_RS16350	D	RHE_RS24850_m4	D	-238	-219	TGCGACGCAACAGGGCCACA	8.0	8.9e-06	-11629	5051
RHE_RS18225	R	RHE_RS24850_m4	R	-375	-356	TGCGAAGGAAGATTACCAAA	10.3	1.9e-06	-13174	5721
RHE_RS28005	R	RHE_RS24850_m4	R	-181	-162	GACGAAGGAAATCTGCCAAA	11.2	1.0e-06	-13816	6000
RHE_RS28010	D	RHE_RS24850_m4	D	-51	-32	GACGAAGGAAATCTGCCAAA	11.2	1.0e-06	-13816	6000
RHE_RS05865	D	RHE_RS24850_m5	D	-129	-106	GTCAGAACGGGGAGAAGATGGCGG	6.9	7.3e-06	-11828	5137
RHE_RS11975	D	RHE_RS24850_m5	D	-274	-251	AGCAGGACGCGAAGACCTCGTCCG	6.5	9.2e-06	-11596	5036
RHE_RS24755	R	RHE_RS24760_m1	R	-112	-94	TCATGACAAAATATCAGGA	14.3	4.3e-08	-16962	7367
RHE_RS24760	D	RHE_RS24760_m1	D	-29	-11	TCATGACAAAATATCAGGA	14.3	4.3e-08	-16962	7367
RHE_RS10890	D	RHE_RS24760_m2	D	-93	-71	ACATTCATTACAAATGTGACAAA	7.7	8.7e-06	-11652	5060
RHE_RS24755	R	RHE_RS24760_m2	R	-103	-81	TTTGTCAGATAATTCATGACAAA	20.8	1.6e-11	-24858	10796
RHE_RS24760	D	RHE_RS24760_m2	D	-42	-20	TTTGTCAGATAATTCATGACAAA	20.8	1.6e-11	-24858	10796
RHE_RS00680	R	RHE_RS24760_m3	R	-87	-60	TTTAGACAGTTGCAACGAACAGTCAAAA	6.1	6.8e-06	-11899	5167
RHE_RS01550	R	RHE_RS24760_m3	R	-127	-100	ACGTTACAGTATGTAACATTTGTGAGAG	5.9	7.6e-06	-11787	5119
RHE_RS11820	R	RHE_RS24760_m3	R	-56	-29	ACATGAATGAAGTGCCATTCTTCCGAAA	7.1	4.0e-06	-12429	5398
RHE_RS19750	R	RHE_RS24760_m3	R	-91	-64	ATTTGCCAAAAGTAATGAAATGTCAAAA	6.5	5.8e-06	-12058	5237
RHE_RS20755	R	RHE_RS24760_m3	R	-329	-302	AATTGAATGGTCTTCACATATGCCAGAT	7.3	3.6e-06	-12535	5444
RHE_RS24755	R	RHE_RS24760_m3	R	-90	-63	TTTTGACTGAACTGCCCCTTTGTCAGAT	20.2	1.8e-10	-22438	9745
RHE_RS24760	D	RHE_RS24760_m3	D	-60	-33	TTTTGACTGAACTGCCCCTTTGTCAGAT	20.2	1.8e-10	-22438	9745
RHE_RS25060	R	RHE_RS24760_m3	R	-51	-24	ATGTGCGATATACGAACAAATGTCAAAT	6.2	6.5e-06	-11944	5187
RHE_RS25065	D	RHE_RS24760_m3	D	-128	-101	ATGTGCGATATACGAACAAATGTCAAAT	6.2	6.5e-06	-11944	5187
RHE_RS24755	R	RHE_RS24760_m4	R	-111	-82	TTGTCAGATAATTCATGACAAAATATCAGG	28.7	6.7e-16	-34939	15174
RHE_RS24760	D	RHE_RS24760_m4	D	-41	-12	TTGTCAGATAATTCATGACAAAATATCAGG	28.7	6.7e-16	-34939	15174
RHE_RS24755	R	RHE_RS24760_m5	R	-112	-94	TCATGACAAAATATCAGGA	18.0	4.8e-10	-21457	9319
RHE_RS24760	D	RHE_RS24760_m5	D	-29	-11	TCATGACAAAATATCAGGA	18.0	4.8e-10	-21457	9319
RHE_RS19750	R	RHE_RS24755_m1	R	-104	-83	ATGTCAAAAAAGGTCTAACTAA	8.5	8.1e-06	-11724	5092
[truncated: 7,083 more rows]
