# Supplementary material for: Rhizobium etli CFN42 and Sinorhizobium meliloti 1021 bioinformatic transcriptional regulatory networks from culture and symbiosis
Source: Front Bioinform. 2024 Aug 28;4:1419274. doi: 10.3389/fbinf.2024.1419274 (PMC11387232; doi:10.3389/fbinf.2024.1419274)
Supplement: Supplementary file 3 [file Table6.xlsx]

## Sheet: Hoja1
a) Bacteroid clustered_TF S. meliloti 1021 network
															b) Distribution of p-values in the Bacteroid clustered_TF network										c) Hierarchy															d) Times-regulated gene
															P-values	Counts	Percentage								Tfs	Regulated genes	Start position of the gene	End position of the gene	Strand-gen	GI	Name locus	Locus tag	Protein product	aa of the protein	COG number	COG group	Function	Number of the gene		Gene	Times-regulated gene	Start position of the gene	End position of the gene	Strand-gene	GI	Name locus	Locus tag	Protein product	aa of the protein
Locus_tag	Upstream_region	Matrix_ID	Chain	End_motif	Start_motif	Site	Weight	P_value	Ln_P_value	Significance		357 Unique Targets	210 Unique Tfs		e-04 New_BACT_DD_RR	22	0.866824								SMc02172	20	522311	523540	R	1232110	-	SMc02172	NP_384581.1	409	COG1940	KG	transcriptional regulator	476		SMc02172	16	522311	523540	R	1232110	-	SMc02172	NP_384581.1	409
SMc02162	R	SMc01260_m1	R	-151	-124	TATATAACTTTGACGTAAACGTCAACAA	12.1	1.0e-08	-18421	8000		SMa0062	SMa0062		e-05 New_BACT_DD_RR	74	2.91568								SMa1207	17	661869	662549	R	1235693	-	SMa1207	NP_435903.2	226	COG0664	T	Crp family transcriptional regulator (plasmid)	4020		SMa2215	16	1240820	1241587	D	1236232	-	SMa2215	NP_436441.1	255
SMc02229	R	SMc01260_m1	R	-139	-112	ACTTTGACGTTTGCGTAAACGTCAAACT	10.4	2.5e-08	-17504	7602		SMa0063	SMa0063		e-06 New_BACT_DD_RR	1422	56.0284								SMc02523	16	3268382	3269278	R	1234696	-	SMc02523	NP_387118.1	298	COG0583	K	transcriptional regulator	3022		SMa0830	16	457737	459167	D	1235488	nifE	SMa0830	NP_435698.1	476
SMc00041	D	SMc01260_m1	D	-48	-21	TCATTTACCTTGACGTTAACGTCAAAAT	10.0	3.1e-08	-17289	7509		SMa0065	SMa0065		e-07 New_BACT_DD_RR	338	13.3176								SMc00241	16	1808061	1808810	R	1233325	-	SMc00241	NP_385772.1	249	COG2186	K	transcriptional regulator	1671		SMa1505	13	830383	831168	D	1235855	-	SMa1505	NP_436065.1	261
SMc02391	R	SMc01260_m1	R	-152	-125	TATATTACGCGTACGTAAAGGTAAATAT	9.3	4.7e-08	-16873	7328		SMa0097	SMa0097		e-08 New_BACT_DD_RR	184	7.2498								SM_b21222	16	785200	786429	D	1237057	-	SM_b21222	NP_437266.1	409	COG1940	KG	transcriptional regulator (plasmid)	5378		SMc04348	12	2231820	2232467	R	1233735	-	SMc04348	NP_386175.1	215
SMc01260	D	SMc01260_m1	D	-62	-35	TGTTTGACTTTTACGTCAAAGTCAATAA	25.8	7.1e-13	-27974	12149		SMa0123	SMa0179		e-09 New_BACT_DD_RR	139	5.47675								SMa0498	16	271057	271956	R	1235082	-	SMa0498	NP_435508.1	299	COG0583	K	LysR family transcriptional regulator (plasmid)	3623		SMc04134	12	138020	138697	D	1231749	-	SMc04134	NP_384224.1	225
SM_b21535	R	SMc01260_m1	R	-75	-48	ACGATTTGATTTATGTAAAGGGAAAAGT	5.2	3.2e-07	-14955	6495		SMa0179	SMa0190		e-10 New_BACT_DD_RR	107	4.21592								SMc04134	15	138020	138697	D	1231749	-	SMc04134	NP_384224.1	225	COG1309	K	transcriptional regulator	118		SMc02560	12	51419	52141	R	1231669	chvI	SMc02560	NP_384150.1	240
SMc02162	R	SMc01260_m2	R	-151	-124	TATATAACTTTGACGTAAACGTCAACAA	12.1	1.0e-08	-18421	8000		SMa0190	SMa0222		e-11 New_BACT_DD_RR	84	3.30969								SMc03122	15	3214897	3215844	R	1234654	-	SMc03122	NP_387077.1	315	COG0583	K	transcriptional regulator	2980		SM_b21706	12	1655215	1656018	R	1237879	-	SM_b21706	NP_438087.1	267
SMc02229	R	SMc01260_m2	R	-139	-112	ACTTTGACGTTTGCGTAAACGTCAAACT	10.4	2.5e-08	-17504	7602		SMa0193	SMa0246		e-12 New_BACT_DD_RR	62	2.44287								SMc00278	15	1848133	1848615	D	1233366	-	SMc00278	NP_385812.1	160	COG1522	K	transcriptional regulator	1711		SMc00658	11	2919147	2919890	R	1234390	-	SMc00658	NP_386820.1	247
SMc00041	D	SMc01260_m2	D	-48	-21	TCATTTACCTTGACGTTAACGTCAAAAT	10.0	3.1e-08	-17289	7509		SMa0222	SMa0267		e-13 New_BACT_DD_RR	37	1.45784								SM_b20582	15	1596355	1597275	R	1237826	-	SM_b20582	NP_438034.1	306	COG0583	K	LysR family transcriptional regulator (plasmid)	6142		SM_b20608	11	1621523	1621861	R	1237852	-	SM_b20608	NP_438060.1	112
SMc02391	R	SMc01260_m2	R	-152	-125	TATATTACGCGTACGTAAAGGTAAATAT	9.3	4.7e-08	-16873	7328		SMa0229	SMa0307		e-14 New_BACT_DD_RR	32	1.26084								SMc02560	14	51419	52141	R	1231669	chvI	SMc02560	NP_384150.1	240	COG0745	TK	transcriptional regulator	44		SMa0232	11	128727	129278	D	1235349	-	SMa0232	NP_435370.2	183
SMc01260	D	SMc01260_m2	D	-62	-35	TGTTTGACTTTTACGTCAAAGTCAATAA	25.8	7.1e-13	-27974	12149		SMa0232	SMa0319		e-15 New_BACT_DD_RR	13	0.512214								SMa5030	14	730316	730981	D	6435274	-	SMa5030	YP_002000352.1	221	COG1309	K	TetR family transcriptional regulator (plasmid)	4091		SMc03287	10	3402810	3405314	R	1234824	-	SMc03287	NP_387239.1	834
SM_b21535	R	SMc01260_m2	R	-75	-48	ACGATTTGATTTATGTAAAGGGAAAAGT	5.2	3.2e-07	-14955	6495		SMa0246	SMa0347		e-16 New_BACT_DD_RR	8	0.315209								SMc02470	13	3326844	3328049	D	1234749	-	SMc02470	NP_387171.1	401	COG1846	K	transcriptional regulator	3075		SMc02391	10	1144305	1144646	R	1232690	-	SMc02391	NP_385153.1	113
SMc02162	R	SMc01260_m3	R	-150	-124	TATATAACTTTGACGTAAACGTCAACA	13.2	5.6e-09	-19000	8252		SMa0267	SMa0355		e-17 New_BACT_DD_RR	5	0.197006								SM_b21641	13	1669034	1669954	R	1237892	paaX	SM_b21641	NP_438100.1	306	COG3327	K	ArsR family transcriptional regulator (plasmid)	6208		SMa5007	10	550344	550724	R	6435273	-	SMa5007	YP_002000351.1	126
SMc02229	R	SMc01260_m3	R	-138	-112	ACTTTGACGTTTGCGTAAACGTCAAAC	9.9	3.2e-08	-17258	7495		SMa0307	SMa0372		e-18 New_BACT_DD_RR	8	0.315209								SM_b21598	13	1138924	1139973	D	1237369	-	SM_b21598	NP_437578.1	349	COG1609	K	transcriptional regulator (plasmid)	5687		SMc03046	9	742440	743111	D	1232317	-	SMc03046	NP_384784.1	223
SMc00041	D	SMc01260_m3	D	-48	-22	TCATTTACCTTGACGTTAACGTCAAAA	9.8	3.4e-08	-17197	7469		SMa0319	SMa0498		e-19 New_BACT_DD_RR	2	0.0788022								SM_b21208	13	960969	961691	R	1237205	-	SM_b21208	NP_437414.2	240	COG1309	K	TetR family transcriptional regulator (plasmid)	5523		SMc02350	9	2772137	2772724	R	1234245	-	SMc02350	NP_386683.1	195
SMc02391	R	SMc01260_m3	R	-151	-125	TATATTACGCGTACGTAAAGGTAAATA	8.6	6.1e-08	-16612	7215		SMa0347	SMa0520		e-20 New_BACT_DD_RR	1	0.0394011								SM_b20203	13	212468	213409	D	1236527	cbbR	SM_b20203	NP_436736.1	313	COG0583	K	transcriptional regulator (plasmid)	4846		SMc02323	9	694158	694970	D	1232268	-	SMc02323	NP_384735.1	270
SMc01260	D	SMc01260_m3	D	-62	-36	TGTTTGACTTTTACGTCAAAGTCAATA	26.2	5.1e-13	-28304	12292		SMa0355	SMa0748		Toal of TF target-genes	2538	100								SMa0748	13	402138	402587	D	1235218	-	SMa0748	NP_435644.2	149	COG4957	K	MucR family transcriptional regulator (plasmid)	3757		SMc00785	9	806545	807009	D	1232370	rirA	SMc00785	NP_384836.1	154
SMc01610	D	SMc01260_m3	D	-76	-50	CTAATAAACTTGACTTAAATGAGAAGG	-2.7	7.5e-06	-11801	5125		SMa0372	SMa0750												SMc02323	12	694158	694970	D	1232268	-	SMc02323	NP_384735.1	270	COG1349	KG	transcriptional regulator	631		SMc00654	9	2922080	2922781	D	1234394	ctrA	SMc00654	NP_386824.1	233
SM_b21535	R	SMc01260_m3	R	-74	-48	ACGATTTGATTTATGTAAAGGGAAAAG	3.3	7.1e-07	-14158	6149		SMa0407	SMa0789												SM_b20722	12	1527168	1527845	R	1237761	-	SM_b20722	NP_437969.1	225	COG0745	TK	two-component response regulator protein (plasmid)	6077		SM_b21346	9	1012574	1013626	D	1237253	-	SM_b21346	NP_437462.1	350
SMc02162	R	SMc01260_m4	R	-151	-124	TATATAACTTTGACGTAAACGTCAACAA	13.3	6.1e-09	-18915	8215		SMa0462	SMa0815												SM_b20537	12	561216	562244	R	1236847	-	SM_b20537	NP_437056.1	342	COG1609	K	transcriptional regulator (plasmid)	5169		SM_b21345	9	1011367	1012350	R	1237252	-	SM_b21345	NP_437461.1	327
SMc02229	R	SMc01260_m4	R	-139	-112	ACTTTGACGTTTGCGTAAACGTCAAACT	12.5	9.7e-09	-18451	8013		SMa0498	SMa0849												SM_b20162	12	180077	180766	D	1236493	-	SM_b20162	NP_436702.1	229	COG2197	TK	transcriptional regulator (plasmid)	4812		SM_b20901	9	1310089	1311300	R	1237528	-	SM_b20901	NP_437737.1	403
SMc00041	D	SMc01260_m4	D	-48	-21	TCATTTACCTTGACGTTAACGTCAAAAT	13.5	5.5e-09	-19019	8260		SMa0520	SMa0985												SMa2008	12	1137545	1138150	R	1236135	-	SMa2008	NP_436345.1	201	COG1309	K	transcriptional regulator (plasmid)	4457		SM_b20521	9	546977	548086	D	1236833	-	SM_b20521	NP_437042.1	369
SMc02391	R	SMc01260_m4	R	-152	-125	TATATTACGCGTACGTAAAGGTAAATAT	10.1	3.6e-08	-17140	7444		SMa0625	SMa1207												SMc04203	11	2188692	2189171	D	1233696	fecI	SMc04203	NP_386137.1	159	COG1595	K	RNA polymerase sigma factor FECI protein	2039		SM_b20455	9	467358	467972	R	1236768	-	SM_b20455	NP_436977.1	204
SMc01260	D	SMc01260_m4	D	-62	-35	TGTTTGACTTTTACGTCAAAGTCAATAA	25.8	7.1e-13	-27974	12149		SMa0636	SMa1299												SMc04163	11	2152254	2153150	R	1233657	-	SMc04163	NP_386098.1	298	COG0583	K	transcriptional regulator	2000		SM_b20203	9	212468	213409	D	1236527	cbbR	SM_b20203	NP_436736.1	313
SM_b21535	R	SMc01260_m4	R	-75	-48	ACGATTTGATTTATGTAAAGGGAAAAGT	5.5	3.5e-07	-14865	6456		SMa0661	SMa1387												SMc03820	11	3486754	3487437	R	1234897	-	SMc03820	NP_387309.1	227	COG0745	TK	transcriptional regulator	3220		SM_b20047	9	59127	59315	D	1236341	-	SM_b20047	NP_436590.1	62
SMc02560	R	SMc01260_m5	R	-105	-89	TTACTTGAGTATAAAGG	8.3	8.5e-06	-11675	5071		SMa0667	SMa1442												SMc01615	11	2405599	2406384	R	1233893	-	SMc01615	NP_386333.1	261	COG1349	KG	transcriptional regulator	2236		SMa1918	9	1092279	1092560	D	1236090	-	SMa1918	NP_436300.1	93
SMc02162	R	SMc01260_m5	R	-144	-128	TAACTTTGACGTAAACG	11.2	1.1e-06	-13720	5959		SMa0690	SMa1454												SMc01610	11	2399127	2400011	D	1233888	-	SMc01610	NP_386328.1	294	COG2207	K	transcriptional regulator	2231		SMc03169	8	3130227	3130937	D	1234577	-	SMc03169	NP_387006.1	236
SMc01260	D	SMc01260_m5	D	-58	-42	TGACTTTTACGTCAAAG	15.7	1.9e-08	-17779	7721		SMa0748	SMa1480												SMc00329	11	283769	284191	D	1231881	irr	SMc00329	NP_384355.1	140	COG0735	P	iron response regulator protein	250		SMc03140	8	3190546	3191277	R	1234630	-	SMc03140	NP_387059.1	243
SMc01982	D	SM_b20004_m1	D	-76	-65	GCAATAATTGTG	10.0	8.8e-06	-11641	5056		SMa0750	SMa1505												SMc00163	11	2002291	2003313	D	1233509	-	SMc00163	NP_385950.1	340	COG1879	G	transcriptional regulator	1850		SMc02340	8	2761391	2762125	D	1234236	-	SMc02340	NP_386674.1	244
SMc00785	D	SM_b20004_m2	D	-87	-62	TGAACTTTTCCACTTTTTGGAATTGT	9.0	5.9e-06	-12041	5229		SMa0751	SMa1632												SM_b20901	11	1310089	1311300	R	1237528	-	SM_b20901	NP_437737.1	403	COG1846	K	transcriptional regulator (plasmid)	5846		SMc02162	8	532686	534386	R	1232119	fadD	SMc02162	NP_384590.1	566
SMc01260	D	SM_b20004_m2	D	-59	-34	TTGACTTTTACGTCAAAGTCAATAAT	10.2	2.4e-06	-12940	5620		SMa0753	SMa1688												SMa0267	11	150483	151175	D	1235367	-	SMa0267	NP_435388.1	230	COG1802	K	GntR family transcriptional regulator (plasmid)	3505		SMc02087	8	1622121	1623410	R	1233162	gltA	SMc02087	NP_385615.1	429
SM_b20004	R	SM_b20004_m2	R	-38	-13	TCGATTATTGCACCATGTGAAATGGT	13.3	1.7e-07	-15587	6770		SMa0772	SMa1749												SMc04264	10	2094373	2095263	D	1233599	-	SMc04264	NP_386040.1	296	COG2207	K	transcriptional regulator	1941		SMc01592	8	2524388	2524864	D	1234003	-	SMc01592	NP_386442.1	158
SM_b20106	D	SM_b20004_m2	D	-95	-70	AGGACGGTTCCCGATCCTGTAATAAT	9.4	4.4e-06	-12334	5357		SMa0773	SMa1893												SMc03123	10	3207160	3208107	D	1234647	-	SMc03123	NP_387076.1	315	COG2390	K	transcriptional regulator	2979		SMc01226	8	1698201	1698491	R	1233219	-	SMc01226	NP_385671.1	96
SMc00785	D	SM_b20004_m3	D	-87	-62	TGAACTTTTCCACTTTTTGGAATTGT	7.7	2.4e-06	-12940	5620		SMa0789	SMa1948												SMc02030	10	2734709	2735614	R	1234210	-	SMc02030	NP_386648.1	301	COG0583	K	transcriptional regulator	2552		SMc01195	8	1735136	1735546	R	1233252	-	SMc01195	NP_385704.1	136
SMc00879	D	SM_b20004_m3	D	-98	-73	TTGATTGTTCCAGTATCCGGAACTGT	9.9	6.6e-07	-14231	6180		SMa0810	SMa1954												SMc01592	10	2524388	2524864	D	1234003	-	SMc01592	NP_386442.1	158	COG1846	K	transcriptional regulator	2345		SMc00109	8	1071584	1072051	R	1232622	-	SMc00109	NP_385085.1	155
SMc01563	R	SM_b20004_m3	R	-112	-87	CCGATTATTTCCCCTGACGTAACGGG	8.4	1.6e-06	-13346	5796		SMa0814	SMa1966												SMc00679	10	2896434	2897375	D	1234368	-	SMc00679	NP_386799.1	313	COG2207	K	transcriptional regulator	2702		SMc00095	8	1044323	1044934	R	1232593	betI	SMc00095	NP_385056.1	203
SM_b20004	R	SM_b20004_m3	R	-38	-13	TCGATTATTGCACCATGTGAAATGGT	26.4	5.1e-15	-32910	14292		SMa0815	SMa2008												SM_b21385	10	1048341	1049276	D	1237294	-	SM_b21385	NP_437503.1	311	COG2207	K	AraC family transcriptional regulator (plasmid)	5612		SM_b21299	8	880615	881406	D	1237134	deoR	SM_b21299	NP_437343.1	263
SM_b20004	R	SM_b20004_m4	R	-38	-9	CCCCTCGATTATTGCACCATGTGAAATGGT	15.2	9.3e-09	-18493	8032		SMa0822	SMa2015												SM_b21359	10	1024474	1024932	D	1237266	-	SM_b21359	NP_437475.1	152	COG0583	K	LysR family transcriptional regulator (plasmid)	5584		SM_b21117	8	758135	758593	R	1237027	-	SM_b21117	NP_437236.1	152
SMc00785	D	SM_b20004_m5	D	-87	-61	TGAACTTTTCCACTTTTTGGAATTGTT	5.1	4.5e-06	-12311	5347		SMa0825	SMa2049												SM_b21115	10	756618	757106	R	1237025	-	SM_b21115	NP_437234.1	162	COG3707	TK	response regulator protein (plasmid)	5347		SM_b21115	8	756618	757106	R	1237025	-	SM_b21115	NP_437234.1	162
SMc00879	D	SM_b20004_m5	D	-98	-72	TTGATTGTTCCAGTATCCGGAACTGTG	8.0	1.1e-06	-13720	5959		SMa0829	SMa2163												SMc02647	9	1173182	1173595	R	1232721	-	SMc02647	NP_385183.1	137	COG0640	K	transcriptional regulator	1081		SM_b21102	8	744023	744805	R	1237012	-	SM_b21102	NP_437221.1	260
SM_b20004	R	SM_b20004_m5	R	-39	-13	TCGATTATTGCACCATGTGAAATGGTC	26.1	5.2e-14	-30588	13284		SMa0830	SMa2215												SMc02366	9	1113918	1114619	D	1232665	-	SMc02366	NP_385128.1	233	COG0745	TK	transcriptional regulator	1025		SM_b20896	8	1304441	1305349	D	1237521	gbpR	SM_b20896	NP_437730.1	302
SMa0190	D	SM_b20033_m1	D	-27	-13	ACGGGGCGGAGCGTG	9.1	9.7e-06	-11543	5013		SMa0831	SMa2303												SMc01945	9	2667667	2668083	D	1234147	-	SMc01945	NP_386585.1	138	COG1846	K	transcriptional regulator	2489		SM_b20665	8	1466169	1466822	R	1237704	-	SM_b20665	NP_437912.1	217
SM_b20033	R	SM_b20033_m1	R	-203	-189	GCACGGAGGAGCGTG	15.6	1.3e-08	-18158	7886		SMa0846	SMa5007												SMc00879	9	907157	908011	D	1232468	-	SMc00879	NP_384933.1	284	COG1414	K	transcriptional regulator	829		SM_b20366	8	378030	379034	D	1236683	-	SM_b20366	NP_436892.1	334
SMc01092	D	SM_b20033_m2	D	-23	-11	AAAATGGACCAAC	6.9	7.1e-06	-11855	5149		SMa0849	SMa5030												SMc00820	9	841879	842829	R	1232406	-	SMc00820	NP_384871.1	316	COG0583	K	transcriptional regulator	767		SM_b20365	8	376824	377852	R	1236682	-	SM_b20365	NP_436891.1	342
SM_b21650	D	SM_b20033_m2	D	-59	-47	AAAATTTACTAAA	6.7	8.1e-06	-11724	5092		SMa0872	SM_b20004												SMc00794	9	814780	815577	R	1232379	-	SMc00794	NP_384845.1	265	COG0784	T	two-component response regulator	741		SM_b20154	8	170752	171738	R	1236485	-	SM_b20154	NP_436694.1	328
SM_b20033	R	SM_b20033_m3	R	-160	-149	CGAACTAGTTAG	16.8	2.3e-08	-17588	7638		SMa1082	SM_b20033												SMc00095	9	1044323	1044934	R	1232593	betI	SMc00095	NP_385056.1	203	COG1309	K	transcriptional regulator BetI	953		SMc04203	7	2188692	2189171	D	1233696	fecI	SMc04203	NP_386137.1	159
SMc03169	D	SM_b20033_m4	D	-159	-136	AAATCGAACCGGTCGGTTCGATTT	2.7	2.6e-06	-12860	5585		SMa1100	SM_b20055												SM_b21493	9	1414906	1415367	R	1237654	-	SM_b21493	NP_437862.1	153	COG1522	K	AsnC family transcriptional regulator (plasmid)	5971		SMc04194	7	2181031	2181228	D	1233686	-	SMc04194	NP_386127.1	65
SM_b20033	R	SM_b20033_m4	R	-168	-145	TTTCCGAACTAGTTAGTACATTTT	23.7	5.6e-12	-25908	11252		SMa1118	SM_b20106												SM_b21346	9	1012574	1013626	D	1237253	-	SM_b21346	NP_437462.1	350	COG1609	K	LacI family transcriptional regulator (plasmid)	5571		SMc03060	7	756368	757438	R	1232333	aglR	SMc03060	NP_384800.1	356
SM_b20033	R	SM_b20033_m4	R	-164	-141	TGATTTTCCGAACTAGTTAGTACA	0.1	8.0e-06	-11736	5097		SMa1132	SM_b20154												SM_b20947	9	1174312	1174608	D	1237401	exoX	SM_b20947	NP_437610.1	98			posttranscriptional regulator, repressor protein (plasmid)	5719		SMc02470	7	3326844	3328049	D	1234749	-	SMc02470	NP_387171.1	401
SMc04239	D	SM_b20033_m5	D	-155	-136	CGAAATAAGTCGGAAATCTT	2.6	5.3e-06	-12148	5276		SMa1136	SM_b20162												SM_b20674	9	1476114	1477133	D	1237713	-	SM_b20674	NP_437921.1	339	COG1609	K	LacI family transcriptional regulator (plasmid)	6030		SMc01975	7	2699551	2700267	D	1234177	-	SMc01975	NP_386615.1	238
SM_b20033	R	SM_b20033_m5	R	-168	-149	CGAACTAGTTAGTACATTTT	26.2	2.7e-13	-28940	12569		SMa1141	SM_b20203												SM_b20608	9	1621523	1621861	R	1237852	-	SM_b20608	NP_438060.1	112	COG0640	K	ArsR family transcriptional regulator (plasmid)	6168		SMc01495	7	2634580	2635533	R	1234113	smoC	SMc01495	NP_386552.1	317
SMc00828	R	SM_b20055_m1	R	-184	-164	GGAGTCGCGGTTCCGACAGAA	11.4	1.2e-06	-13633	5921		SMa1169	SM_b20219												SM_b20457	9	468904	470052	R	1236770	-	SM_b20457	NP_436979.1	382	COG2207	K	transcriptional regulator transcription regulator protein (plasmid)	5090		SMc00953	7	1780439	1781368	R	1233304	-	SMc00953	NP_385751.1	309
SM_b20055	D	SM_b20055_m1	D	-53	-33	GGATTGGCGGATCGGACATTA	18.8	8.7e-11	-23165	10060		SMa1201	SM_b20276												SM_b20375	9	386667	387437	R	1236692	-	SM_b20375	NP_436901.1	256	COG2186	K	transcriptional regulator (plasmid)	5012		SMc00820	7	841879	842829	R	1232406	-	SMc00820	NP_384871.1	316
SMc00828	R	SM_b20055_m2	R	-184	-164	GGAGTCGCGGTTCCGACAGAA	11.3	6.4e-07	-14262	6194		SMa1207	SM_b20344												SM_b20347	9	354773	355381	R	1236664	-	SM_b20347	NP_436873.1	202	COG1309	K	transcriptional regulator (plasmid)	4984		SMc00529	7	1880026	1881192	R	1233401	nifS	SMc00529	NP_385842.1	388
SM_b20055	D	SM_b20055_m2	D	-53	-33	GGATTGGCGGATCGGACATTA	18.5	9.3e-10	-20796	9032		SMa1211	SM_b20347												SMa1688	9	951569	951985	D	1235963	-	SMa1688	NP_436173.1	138	COG4566	TK	Two-component response regulator (plasmid)	4292		SMc00270	7	1839338	1840192	R	1233358	-	SMc00270	NP_385804.1	284
SM_b20055	D	SM_b20055_m2	D	-32	-12	GGCGGGCCGAAACCGACAAAG	17.8	2.5e-09	-19807	8602		SMa1231	SM_b20366												SMa0246	9	136409	137119	D	1235355	-	SMa0246	NP_435376.2	236	COG2186	K	GntR family transcriptional regulator (plasmid)	3493		SM_b21535	7	1063030	1063899	R	1237306	-	SM_b21535	NP_437515.1	289
SMa0814	R	SM_b20055_m3	R	-180	-167	AAAGGACGGAGAAA	11.0	2.4e-06	-12940	5620		SMa1299	SM_b20367												SMa0065	9	35455	36147	D	1235257	-	SMa0065	NP_435278.1	230	COG1802	K	GntR family transcriptional regulator (plasmid)	3393		SM_b21222	7	785200	786429	D	1237057	-	SM_b21222	NP_437266.1	409
SM_b21579	D	SM_b20055_m3	D	-15	-2	AAAGGAGAAACAGA	10.6	3.6e-06	-12535	5444		SMa1334	SM_b20375												SMa0063	9	33453	34187	D	1235255	-	SMa0063	NP_435276.2	244	COG2186	K	GntR family transcriptional regulator (plasmid)	3391		SM_b20859	7	1263877	1264827	D	1237483	-	SM_b20859	NP_437692.1	316
SM_b20055	D	SM_b20055_m4	D	-41	-12	CGGACATTAGGCGGGCCGAAACCGACAAAG	32.6	1.8e-17	-38556	16745		SMa1339	SM_b20392												SMa0062	9	32634	33323	D	1235254	-	SMa0062	NP_435275.1	229	COG1802	K	GntR family transcriptional regulator (plasmid)	3390		SM_b20843	7	634671	636197	R	1236917	algI	SM_b20843	NP_437126.1	508
SMa0748	D	SM_b20106_m1	D	-224	-200	TCCTGGCGCACCGAGGACGCGACGT	11.2	2.1e-06	-13074	5678		SMa1387	SM_b20425												SMc04348	8	2231820	2232467	R	1233735	-	SMc04348	NP_386175.1	215	COG1309	K	transcriptional regulator	2077		SM_b20817	7	605893	606924	R	1236888	-	SM_b20817	NP_437097.1	343
SMc00654	D	SM_b20106_m2	D	-107	-97	AGAATTTGTTA	10.6	6.9e-06	-11884	5161		SMa1442	SM_b20426												SMc04032	8	3035290	3036072	R	1234491	-	SMc04032	NP_386921.1	260	COG2197	TK	transcriptional regulator	2824		SM_b20674	7	1476114	1477133	D	1237713	-	SM_b20674	NP_437921.1	339
SMa0748	D	SM_b20106_m2	D	-32	-22	TCAATTTGTAA	10.3	9.7e-06	-11543	5013		SMa1454	SM_b20441												SMc03998	8	2996119	2996379	D	1234458	-	SMc03998	NP_386888.1	86	COG0640	K	transcriptional regulator	2791		SM_b20673	7	1474322	1475902	R	1237712	-	SM_b20673	NP_437920.1	526
SM_b20106	D	SM_b20106_m2	D	-66	-56	TTAATGTGTTA	11.6	2.3e-06	-12983	5638		SMa1456	SM_b20455												SMc03890	8	3557698	3558480	R	1234967	-	SMc03890	NP_387379.1	260	COG1349	KG	transcriptional regulator	3291		SM_b20375	7	386667	387437	R	1236692	-	SM_b20375	NP_436901.1	256
SMc00794	R	SM_b20106_m4	R	-154	-137	ACCGGCTGGTGCGGCCTT	10.1	7.3e-06	-11828	5137		SMa1480	SM_b20457												SMc01762	8	1309800	1310135	D	1232844	-	SMc01762	NP_385306.1	111	COG0640	K	transcriptional regulator	1205		SM_b20004	7	7268	8173	R	1236420	gstR	SM_b20004	NP_436547.1	301
SMc00270	R	SM_b20106_m5	R	-15	-3	GGTTCCTCCCCTC	10.0	6.0e-06	-12024	5222		SMa1505	SM_b20509												SMc01495	8	2634580	2635533	R	1234113	smoC	SMc01495	NP_386552.1	317	COG2390	K	transcriptional regulator	2456		SMa2009	7	1138205	1138654	D	1236136	-	SMa2009	NP_436346.1	149
SM_b20665	R	SM_b20154_m1	R	-119	-108	ATAATTCCAAAT	10.6	4.7e-06	-12268	5328		SMa1632	SM_b20516												SMc01406	8	2248249	2249667	R	1233751	-	SMc01406	NP_386191.1	472	COG1167	KE	transcriptional regulator	2093		SMa2008	7	1137545	1138150	R	1236135	-	SMa2008	NP_436345.1	201
SMa1132	D	SM_b20154_m2	D	-393	-380	TGCACACTTGTGCG	9.9	2.1e-06	-13074	5678		SMa1688	SM_b20525												SMc01403	8	2244554	2245018	R	1233746	-	SMc01403	NP_386186.1	154	COG1522	K	transcriptional regulator	2088		SMa1948	7	1105815	1106531	D	1236102	-	SMa1948	NP_436312.1	238
SM_b20154	R	SM_b20154_m2	R	-231	-218	TGCTCACGTGTGCA	16.9	8.1e-09	-18631	8092		SMa1749	SM_b20531												SMc01260	8	1515627	1516013	D	1233057	-	SMc01260	NP_385510.1	128	COG0789	K	transcriptional regulator	1409		SMa1132	7	618493	618882	D	1235648	-	SMa1132	NP_435858.1	129
SM_b20154	R	SM_b20154_m2	R	-179	-166	TGAACACGTGTGCG	15.3	3.5e-08	-17168	7456		SMa1797	SM_b20537												SMc00953	8	1780439	1781368	R	1233304	-	SMc00953	NP_385751.1	309	COG2207	K	transcriptional regulator	1650		SMa0753	7	406804	407496	D	1235222	-	SMa0753	NP_435648.1	230
SMa1132	D	SM_b20154_m3	D	-393	-377	TGCACACTTGTGCGGGC	6.1	7.3e-06	-11828	5137		SMa1893	SM_b20582												SMc00490	8	1918527	1919945	D	1233442	-	SMc00490	NP_385883.1	472	COG1167	KE	transcriptional regulator	1783		SMa0667	7	355528	356016	D	1235172	-	SMa0667	NP_435598.1	162
SM_b20154	R	SM_b20154_m3	R	-234	-218	TGCTCACGTGTGCATTT	19.8	2.3e-10	-22193	9638		SMa1910	SM_b20586												SMc00479	8	1938413	1939429	R	1233458	-	SMc00479	NP_385899.1	338	COG2207	K	transcriptional regulator	1799		SMc03843	6	3508582	3508896	R	1234920	-	SMc03843	NP_387332.1	104
SM_b20154	R	SM_b20154_m3	R	-182	-166	TGAACACGTGTGCGTAT	17.9	3.0e-09	-19625	8523		SMa1918	SM_b20592												SM_b21650	8	1681406	1682485	D	1237901	-	SM_b21650	NP_438109.1	359	COG1609	K	LacI family transcriptional regulator (plasmid)	6217		SMc03820	6	3486754	3487437	R	1234897	-	SMc03820	NP_387309.1	227
SMa1132	D	SM_b20154_m4	D	-64	-45	TATGGAATTTCCGATCCCCG	8.9	8.1e-06	-11724	5092		SMa1948	SM_b20608												SM_b21579	8	1119502	1119945	D	1237350	hmrR2	SM_b21579	NP_437559.1	147	COG0789	K	MerR family transcriptional regulator (plasmid)	5668		SMc03122	6	3214897	3215844	R	1234654	-	SMc03122	NP_387077.1	315
SM_b20154	R	SM_b20154_m4	R	-309	-290	TTTGGAATTTTTATTCCGCC	15.1	3.2e-08	-17258	7495		SMa1954	SM_b20674												SM_b21372	8	1036546	1037604	R	1237281	-	SM_b21372	NP_437490.1	352	COG1609	K	LacI family transcriptional regulator (plasmid)	5599		SMc02851	6	201956	202399	D	1231807	-	SMc02851	NP_384282.1	147
SMc01908	R	SM_b20154_m5	R	-212	-196	ATTCAAGCATTCCGTGG	9.2	9.6e-06	-11554	5018		SMa1966	SM_b20683												SM_b21102	8	744023	744805	R	1237012	-	SM_b21102	NP_437221.1	260	COG1414	K	transcriptional regulator (plasmid)	5334		SMc02773	6	20543	22096	D	1231646	-	SMc02773	NP_384127.1	517
SM_b20154	R	SM_b20154_m5	R	-279	-263	GATCATACGTTCCATAA	17.3	1.7e-10	-22495	9770		SMa2008	SM_b20717												SM_b20869	8	1276480	1277181	D	1237494	-	SM_b20869	NP_437703.1	233	COG4566	TK	two-component response regulator protein (plasmid)	5812		SMc02229	6	591449	593245	R	1232171	-	SMc02229	NP_384640.1	598
SMc01267	D	SM_b20162_m1	D	-13	-3	GGGAGAGCACG	11.7	5.9e-07	-14343	6229		SMa2009	SM_b20722												SM_b20509	8	531624	532391	D	1236822	-	SM_b20509	NP_437031.1	255	COG2186	K	transcriptional regulator (plasmid)	5143		SMc01610	6	2399127	2400011	D	1233888	-	SMc01610	NP_386328.1	294
SMc00864	R	SM_b20162_m2	R	-318	-306	TCTCTCTTTCCCA	11.2	2.4e-06	-12940	5620		SMa2015	SM_b20817												SM_b20344	8	349255	350211	R	1236661	-	SM_b20344	NP_436870.1	318	COG4977	K	transcriptional regulator (plasmid)	4981		SMc01551	6	2491027	2492595	D	1233968	-	SMc01551	NP_386408.1	522
SMc01982	D	SM_b20162_m2	D	-114	-102	GATCTCTTCCCGA	11.3	2.1e-06	-13074	5678		SMa2049	SM_b20859												SM_b20033	8	43775	44437	R	1236449	-	SM_b20033	NP_436576.1	220	COG1309	K	transcriptional regulator (plasmid)	4685		SMc00800	6	819830	820273	R	1232385	-	SMc00800	NP_384851.1	147
SMc01989	D	SM_b20162_m2	D	-219	-207	TTTCTCCCTCCGG	9.8	8.4e-06	-11687	5076		SMa2163	SM_b20869												SMa1749	8	991460	992359	R	1236000	-	SMa1749	NP_436210.1	299	COG2207	K	transcriptional regulator (plasmid)	4325		SMc00241	6	1808061	1808810	R	1233325	-	SMc00241	NP_385772.1	249
SMa0829	D	SM_b20162_m2	D	-86	-74	GATCTCTCCCCCG	12.2	8.3e-07	-14002	6081		SMa2167	SM_b20896												SMa1632	8	907961	908914	D	1235926	-	SMa1632	NP_436136.1	317	COG0583	K	LysR family transcriptional regulator (plasmid)	4255		SMc00041	6	1060171	1060566	D	1232608	-	SMc00041	NP_385071.1	131
SMa1334	R	SM_b20162_m2	R	-14	-2	TCTCTCCTCCCCG	11.4	1.9e-06	-13174	5721		SMa2215	SM_b20901												SMa0815	8	445895	447520	R	1235479	nifA	SMa0815	NP_435689.2	541	COG3604	KT	Fis family transcriptional regulator (plasmid)	3803		SM_b21598	6	1138924	1139973	D	1237369	-	SM_b21598	NP_437578.1	349
SM_b20033	R	SM_b20162_m2	R	-33	-21	GCTCTCCCTCAAG	9.7	9.1e-06	-11607	5041		SMa2263	SM_b20947												SMc04143	7	128940	129662	D	1231740	-	SMc04143	NP_384215.1	240	COG2186	K	transcriptional regulator	109		SM_b21300	6	881501	882505	D	1237135	deoC	SM_b21300	NP_437344.1	334
SM_b21345	R	SM_b20162_m2	R	-20	-8	TCTCTCCTCCCGG	11.5	1.7e-06	-13285	5770		SMa2303	SM_b21021												SMc04109	7	164746	166032	D	1231774	cpaE1	SMc04109	NP_384249.1	428	COG4963	UW	response regulator protein	143		SM_b20947	6	1174312	1174608	D	1237401	exoX	SM_b20947	NP_437610.1	98
SM_b21346	D	SM_b20162_m2	D	-220	-208	TCTCTCCTCCCGG	11.5	1.7e-06	-13285	5770		SMa5007	SM_b21079												SMc03169	7	3130227	3130937	D	1234577	-	SMc03169	NP_387006.1	236	COG1309	K	transcriptional regulator	2909		SM_b20819	6	608264	608581	D	1236890	mocE	SM_b20819	NP_437099.1	105
SMc01267	D	SM_b20162_m3	D	-16	-3	CGCGGGAGAGCACG	11.4	8.2e-07	-14014	6086		SMa5030	SM_b21093												SMc03140	7	3190546	3191277	R	1234630	-	SMc03140	NP_387059.1	243	COG2188	K	transcriptional regulator	2962		SM_b20818	6	607130	608221	D	1236889	mocD	SM_b20818	NP_437098.2	363
SM_b20162	D	SM_b20162_m3	D	-102	-89	CTGGGGAGAGTACG	19.5	5.8e-10	-21268	9237		SM_b20004	SM_b21102												SMc03060	7	756368	757438	R	1232333	aglR	SMc03060	NP_384800.1	356	COG1609	K	transcriptional regulator	696		SM_b20441	6	452507	453247	D	1236754	-	SM_b20441	NP_436963.1	246
SM_b20162	D	SM_b20162_m4	D	-195	-173	ATCTCGTGCGCGTATCGCCGACA	24.9	7.6e-14	-30208	13119		SM_b20033	SM_b21115												SMc01225	7	1699144	1700052	R	1233220	-	SMc01225	NP_385672.1	302	COG0583	K	transcriptional regulator	1571		SM_b20033	6	43775	44437	R	1236449	-	SM_b20033	NP_436576.1	220
SMa1132	D	SM_b20162_m5	D	-129	-117	GTTGTGCGACACT	10.0	6.4e-06	-11959	5194		SM_b20047	SM_b21117												SMc01092	7	466650	467540	D	1232063	-	SMc01092	NP_384535.1	296	COG0583	K	transcriptional regulator	430		SMa2015	6	1141886	1142407	R	1236140	-	SMa2015	NP_436350.1	173
SM_b20162	D	SM_b20162_m5	D	-128	-116	ACTGTGCGACAAC	12.9	4.3e-07	-14659	6367		SM_b20049	SM_b21158												SMc00654	7	2922080	2922781	D	1234394	ctrA	SMc00654	NP_386824.1	233	COG0745	TK	response regulator,controls chromosomal replication initiation protein	2727		SMa1797	6	1018587	1018913	D	1236026	-	SMa1797	NP_436236.1	108
SM_b20457	R	SM_b20162_m5	R	-84	-72	TCTGTCCCACACT	9.8	7.6e-06	-11787	5119		SM_b20055	SM_b21169												SMc00275	7	1844280	1845254	D	1233363	-	SMc00275	NP_385809.1	324	COG0583	K	transcriptional regulator	1708		SMa0872	6	483424	483756	D	1235513	orf110	SMa0872	NP_435723.1	110
SMc02172	R	SM_b20203_m1	R	-237	-211	AATAATTCAATTTGATTTATTTATTGA	6.3	4.3e-06	-12357	5367		SM_b20106	SM_b21180												SMc00146	7	2023390	2023881	D	1233527	-	SMc00146	NP_385968.1	163	COG1846	K	transcriptional regulator	1868		SMa0822	6	450461	451339	R	1235483	fixA	SMa0822	NP_435693.1	292
SMc02172	R	SM_b20203_m1	R	-233	-207	AGATAATAATTCAATTTGATTTATTTA	14.9	1.7e-08	-17890	7770		SM_b20154	SM_b21208												SM_b21569	7	1107381	1107980	R	1237340	-	SM_b21569	NP_437549.1	199	COG1917	R	transcriptional regulator (plasmid)	5658		SMa0789	6	429441	430136	D	1235461	-	SMa0789	NP_435671.2	231
SMc04194	D	SM_b20203_m1	D	-294	-268	AAATGTATATTATAATTTCCTTGCATA	5.0	9.2e-06	-11596	5036		SM_b20162	SM_b21210												SM_b21535	7	1063030	1063899	R	1237306	-	SM_b21535	NP_437515.1	289	COG0583	K	LysR family transcriptional regulator (plasmid)	5624		SMa0773	6	419284	420714	D	1235452	noeA	SMa0773	NP_435662.1	476
SMc04348	R	SM_b20203_m1	R	-221	-195	CCTACATTACGAAAATATAATGATCTC	6.2	4.8e-06	-12247	5319		SM_b20203	SM_b21222												SM_b21484	7	1405318	1405839	D	1237643	rpoE5	SM_b21484	NP_437851.1	173	COG1595	K	RNA polymerase sigma-E factor (sigma-24) protein (plasmid)	5960		SMa0625	6	334433	334594	D	1235147	-	SMa0625	NP_435573.1	53
SM_b20203	D	SM_b20203_m1	D	-34	-8	ACTTCATAAGTTAAATTTCCTTACTTT	25.8	2.1e-13	-29192	12678		SM_b20219	SM_b21291												SM_b21117	7	758135	758593	R	1237027	-	SM_b21117	NP_437236.1	152	COG1396	K	transcriptional regulator (plasmid)	5349		SMa0372	6	199105	200004	R	1235425	-	SMa0372	NP_435446.1	299
SM_b21222	D	SM_b20203_m1	D	-70	-44	TCTTATTAAGTCAATTGTCTTGACTTA	9.0	9.8e-07	-13836	6009		SM_b20231	SM_b21299												SM_b20896	7	1304441	1305349	D	1237521	gbpR	SM_b20896	NP_437730.1	302	COG0583	K	LysR family transcriptional regulator (plasmid)	5839		SMa0179	6	98400	99317	R	1235319	-	SMa0179	NP_435340.1	305
SMc00820	R	SM_b20203_m2	R	-73	-63	AATAAGGATTT	10.2	5.1e-06	-12186	5292		SM_b20232	SM_b21336												SM_b20859	7	1263877	1264827	D	1237483	-	SM_b20859	NP_437692.1	316	COG2207	K	AraC family transcriptional regulator (plasmid)	5801		SMa0097	6	50138	51079	R	1235274	-	SMa0097	NP_435295.1	313
SMa0636	D	SM_b20203_m2	D	-14	-4	GTTAAGGATGT	9.9	7.0e-06	-11870	5155		SM_b20255	SM_b21346												SM_b20817	7	605893	606924	R	1236888	-	SM_b20817	NP_437097.1	343	COG1879	G	LacI family transcriptional regulator (plasmid)	5210		SMc04239	5	2065483	2065692	D	1233574	-	SMc04239	NP_386015.1	69
SMc04194	D	SM_b20203_m3	D	-296	-281	ACAAATGTATATTATA	12.0	7.7e-07	-14077	6114		SM_b20276	SM_b21359												SM_b20683	7	1485370	1486269	R	1237722	-	SM_b20683	NP_437930.1	299	COG0583	K	LysR family transcriptional regulator (plasmid)	6039		SMc04163	5	2152254	2153150	R	1233657	-	SMc04163	NP_386098.1	298
SM_b21180	R	SM_b20203_m3	R	-33	-18	GAAAATGTACTTTATG	10.6	4.0e-06	-12429	5398		SM_b20331	SM_b21372												SM_b20531	7	554980	555516	D	1236841	-	SM_b20531	NP_437050.1	178	COG1595	K	RNA polymerase sigma factor (plasmid)	5163		SMc03015	5	714089	714826	D	1232286	-	SMc03015	NP_384753.1	245
SMc02172	R	SM_b20203_m4	R	-233	-209	ATAATAATTCAATTTGATTTATTTA	14.4	1.2e-08	-18238	7921		SM_b20344	SM_b21385												SM_b20455	7	467358	467972	R	1236768	-	SM_b20455	NP_436977.1	204	COG1309	K	transcriptional regulator (plasmid)	5088		SMc01995	5	2659700	2660086	D	1234135	-	SMc01995	NP_386574.1	128
SMc01195	R	SM_b20203_m4	R	-109	-85	CACATAAGATAGATTATGGAACTAA	7.2	9.4e-07	-13877	6027		SM_b20347	SM_b21464												SM_b20004	7	7268	8173	R	1236420	gstR	SM_b20004	NP_436547.1	301	COG0583	K	gstR-like transcriptional regulator protein (plasmid)	4656		SMc01945	5	2667667	2668083	D	1234147	-	SMc01945	NP_386585.1	138
SMc04348	R	SM_b20203_m4	R	-221	-197	TACATTACGAAAATATAATGATCTC	3.5	6.1e-06	-12007	5215		SM_b20365	SM_b21484												SMa1505	7	830383	831168	D	1235855	-	SMa1505	NP_436065.1	261	COG1802	K	GntR family transcriptional regulator (plasmid)	4183		SMc01908	5	1370272	1370745	R	1232905	-	SMc01908	NP_385366.1	157
SMa2215	D	SM_b20203_m4	D	-150	-126	AAAACAAGTAAAATGCCTAAAATAT	3.1	7.3e-06	-11828	5137		SM_b20366	SM_b21493												SMa1480	7	814015	814902	D	1235842	-	SMa1480	NP_436052.2	295	COG0583	K	LysR family transcriptional regulator (plasmid)	4169		SMc01819	5	2642750	2643391	R	1234119	-	SMc01819	NP_386558.1	213
SM_b20203	D	SM_b20203_m4	D	-59	-35	GGAGTTTGTAAAATTTATTCATTTG	4.8	3.1e-06	-12684	5509		SM_b20367	SM_b21533												SMa0789	7	429441	430136	D	1235461	-	SMa0789	NP_435671.2	231	COG1802	K	GntR family transcriptional regulator (plasmid)	3786		SMc01563	5	2501869	2503923	R	1233981	sigA	SMc01563	NP_386420.1	684
SM_b20203	D	SM_b20203_m4	D	-32	-8	TTCATAAGTTAAATTTCCTTACTTT	25.3	8.6e-13	-27782	12066		SM_b20375	SM_b21535												SMa0372	7	199105	200004	R	1235425	-	SMa0372	NP_435446.1	299	COG0583	K	LysR family transcriptional regulator (plasmid)	3561		SMc01456	5	2300353	2300787	D	1233805	-	SMc01456	NP_386245.1	144
SM_b21222	D	SM_b20203_m4	D	-68	-44	TTATTAAGTCAATTGTCTTGACTTA	6.2	1.5e-06	-13410	5824		SM_b20392	SM_b21569												SMc03258	6	3373376	3374068	R	1234797	-	SMc03258	NP_387217.1	230	COG1802	K	transcriptional regulator	3122		SMc01450	5	2291666	2292181	D	1233799	-	SMc01450	NP_386239.1	171
SMc00109	R	SM_b20203_m5	R	-198	-173	AATATTCAAAATCAATAATTTAGCTA	3.0	8.2e-06	-11711	5086		SM_b20425	SM_b21579												SMc03092	6	3256471	3256905	R	1234685	-	SMc03092	NP_387107.1	144	COG1522	K	transcriptional regulator	3010		SMc01182	5	1750507	1751586	R	1233268	-	SMc01182	NP_385717.1	359
SMc03287	R	SM_b20203_m5	R	-285	-260	CTAACTAAACTCTAATATAATCACCT	4.0	5.0e-06	-12206	5301		SM_b20426	SM_b21598												SMc03046	6	742440	743111	D	1232317	-	SMc03046	NP_384784.1	223	COG0745	TK	transcriptional regulator	680		SMc00864	5	922416	923495	R	1232483	-	SMc00864	NP_384948.1	359
SMa0872	D	SM_b20203_m5	D	-399	-374	TCAACGCAACTGAATCCATGTTACAC	3.7	5.8e-06	-12058	5237		SM_b20441	SM_b21641												SMc02893	6	250422	251348	D	1231850	-	SMc02893	NP_384324.1	308	COG0583	K	transcriptional regulator	219		SMc00831	5	852348	853244	R	1232417	-	SMc00831	NP_384882.1	298
SM_b20203	D	SM_b20203_m5	D	-56	-31	GTTTGTAAAATTTATTCATTTGACTT	8.6	4.5e-07	-14614	6347		SM_b20455	SM_b21649												SMc02851	6	201956	202399	D	1231807	-	SMc02851	NP_384282.1	147	COG1846	K	transcriptional regulator	176		SMc00794	5	814780	815577	R	1232379	-	SMc00794	NP_384845.1	265
SMa1141	D	SM_b20219_m1	D	-110	-99	CGCCGTTACACT	9.8	5.8e-06	-12058	5237		SM_b20457	SM_b21650												SMc02584	6	72733	73317	R	1231690	actR	SMc02584	NP_384171.1	194	COG4567	TK	transcriptional regulator	65		SMc00679	5	2896434	2897375	D	1234368	-	SMc00679	NP_386799.1	313
SM_b20219	R	SM_b20219_m1	R	-57	-46	TGCCGTGACAGC	10.1	2.4e-06	-12940	5620		SM_b20465	SM_b21706												SMc02223	6	584615	585271	R	1232165	-	SMc02223	NP_384634.1	218	COG2932	X	transcriptional regulator	529		SMc00256	5	1824818	1825825	R	1233344	-	SMc00256	NP_385790.1	335
SM_b20219	R	SM_b20219_m2	R	-75	-46	TGCCGTGACAGCAGTATTCATCGGCTCGTG	18.5	9.4e-11	-23088	10027		SM_b20484	SMc00095												SMc01975	6	2699551	2700267	D	1234177	-	SMc01975	NP_386615.1	238	COG2186	K	transcriptional regulator	2519		SM_b21650	5	1681406	1682485	D	1237901	-	SM_b21650	NP_438109.1	359
SM_b21117	R	SM_b20219_m3	R	-172	-151	TGCCGCACCAGGGGGCAAGGTG	10.3	4.6e-06	-12289	5337		SM_b20508	SMc00107												SMc01651	6	2448176	2449084	D	1233929	-	SMc01651	NP_386369.1	302	COG0583	K	transcriptional regulator	2272		SM_b21641	5	1669034	1669954	R	1237892	paaX	SM_b21641	NP_438100.1	306
SM_b20219	R	SM_b20219_m4	R	-52	-37	GAACGAGAATGCCGTG	11.7	1.3e-06	-13553	5886		SM_b20509	SMc00109												SMc01630	6	2422399	2423202	R	1233908	-	SMc01630	NP_386348.1	267	COG2197	TK	transcriptional regulator	2251		SM_b21574	5	1113430	1113813	D	1237345	-	SM_b21574	NP_437554.1	127
SMc04363	R	SM_b20276_m1	R	-33	-10	CTCATGAAACTGTCGTTTCACGGG	7.3	3.1e-06	-12684	5509		SM_b20516	SMc00146												SMc01226	6	1698201	1698491	R	1233219	-	SMc01226	NP_385671.1	96	COG0640	K	transcriptional regulator	1570		SM_b20683	5	1485370	1486269	R	1237722	-	SM_b20683	NP_437930.1	299
SM_b20276	D	SM_b20276_m1	D	-51	-28	ACACTGAAACATTCGTTGCAATGG	22.1	1.1e-11	-25233	10959		SM_b20521	SMc00163												SMc00831	6	852348	853244	R	1232417	-	SMc00831	NP_384882.1	298	COG0583	K	transcriptional regulator	778		SMa1749	5	991460	992359	R	1236000	-	SMa1749	NP_436210.1	299
SMc00820	R	SM_b20276_m2	R	-60	-37	CATTAAAAACATTCGTTGGACTGA	4.4	9.7e-06	-11543	5013		SM_b20522	SMc00241												SMc00785	6	806545	807009	D	1232370	rirA	SMc00785	NP_384836.1	154	COG1959	K	iron-responsive transcriptional regulator	732		SMa1339	5	732787	733692	D	1235768	-	SMa1339	NP_435978.2	301
SMc04363	R	SM_b20276_m2	R	-33	-10	CTCATGAAACTGTCGTTTCACGGG	6.9	2.8e-06	-12786	5553		SM_b20525	SMc00256												SM_b21464	6	1391174	1391947	D	1237622	-	SM_b21464	NP_437830.1	257	COG2188	K	GntR family transcriptional regulator (plasmid)	5939		SMa0825	5	453556	454449	D	1235485	nifH	SMa0825	NP_435695.1	297
SM_b20276	D	SM_b20276_m2	D	-51	-28	ACACTGAAACATTCGTTGCAATGG	22.7	7.2e-12	-25657	11143		SM_b20531	SMc00275												SM_b21336	6	1002815	1003759	D	1237243	-	SM_b21336	NP_437452.1	314	COG2207	K	AraC family transcriptional regulator (plasmid)	5561		SMa0661	5	350388	350867	D	1235167	-	SMa0661	NP_435593.1	159
SMc00794	R	SM_b20276_m3	R	-127	-108	AGAAACAGTCGCGGCAAATG	8.1	7.0e-06	-11870	5155		SM_b20537	SMc00278												SM_b20592	6	1606089	1606772	D	1237836	rpo	SM_b20592	NP_438044.1	227	COG1595	K	RNA polymerase sigma factor (plasmid)	6152		SMa0498	5	271057	271956	R	1235082	-	SMa0498	NP_435508.1	299
SMc00820	R	SM_b20276_m3	R	-60	-41	AAAAACATTCGTTGGACTGA	9.4	3.0e-06	-12717	5523		SM_b20582	SMc00329												SM_b20586	6	1601452	1602207	R	1237830	-	SM_b20586	NP_438038.1	251	COG1414	K	IclR family transcriptional regulator (plasmid)	6146		SMa0407	5	222078	222866	D	1235038	-	SMa0407	NP_435464.1	262
SMc04363	R	SM_b20276_m3	R	-33	-14	TGAAACTGTCGTTTCACGGG	8.1	7.0e-06	-11870	5155		SM_b20586	SMc00429												SM_b20426	6	440994	442274	D	1236743	-	SM_b20426	NP_436952.1	426	COG1167	KE	transcriptional regulator (plasmid)	5063		SMa0355	5	191922	192416	D	1235416	-	SMa0355	NP_435437.2	164
SM_b20276	D	SM_b20276_m3	D	-47	-28	TGAAACATTCGTTGCAATGG	21.1	9.1e-12	-25423	11041		SM_b20592	SMc00458												SM_b20425	6	440290	440784	R	1236742	-	SM_b20425	NP_436951.1	164	COG1522	K	transcriptional regulator (plasmid)	5062		SMc04320	4	2222629	2222865	D	1233725	rpsU	SMc04320	NP_386165.1	78
SMc00820	R	SM_b20276_m4	R	-60	-37	CATTAAAAACATTCGTTGGACTGA	4.8	8.4e-06	-11687	5076		SM_b20608	SMc00479												SM_b20276	6	280415	281305	D	1236597	-	SM_b20276	NP_436806.1	296	COG1737	K	transcriptional regulator (plasmid)	4917		SMc04162	4	2151826	2152155	R	1233656	-	SMc04162	NP_386097.1	109
SMc04363	R	SM_b20276_m4	R	-33	-10	CTCATGAAACTGTCGTTTCACGGG	7.6	2.0e-06	-13122	5699		SM_b20615	SMc00490												SMa2303	6	1283423	1284649	R	1236277	-	SMa2303	NP_436486.1	408	COG1940	KG	ROK family transcriptional regulator (plasmid)	4593		SMc03258	4	3373376	3374068	R	1234797	-	SMc03258	NP_387217.1	230
SM_b20276	D	SM_b20276_m4	D	-51	-28	ACACTGAAACATTCGTTGCAATGG	23.4	2.5e-12	-26715	11602		SM_b20665	SMc00654												SMa1454	6	801299	802342	D	1235829	-	SMa1454	NP_436039.2	347	COG2207	K	AraC family transcriptional regulator (plasmid)	4156		SMc03252	4	3366186	3367034	R	1234791	proB2	SMc03252	NP_387212.1	282
SM_b21291	R	SM_b20276_m4	R	-89	-66	TTTTTGAAAGAGTTGGTGCGATGG	5.4	6.2e-06	-11991	5208		SM_b20673	SMc00658												SMa1442	6	795334	796098	R	1235824	-	SMa1442	NP_436034.1	254	COG2186	K	GntR family transcriptional regulator (plasmid)	4151		SMc03210	4	3174933	3175412	R	1234618	-	SMc03210	NP_387047.1	159
SMc03210	R	SM_b20344_m1	R	-66	-48	TGCTGAATCACGCAAGAAT	8.0	7.4e-06	-11814	5131		SM_b20674	SMc00678												SMa0750	6	403178	404056	R	1235219	-	SMa0750	NP_435645.1	292	COG0583	K	LysR family transcriptional regulator (plasmid)	3759		SMc02893	4	250422	251348	D	1231850	-	SMc02893	NP_384324.1	308
SMa0822	R	SM_b20344_m1	R	-137	-119	GGGATGATCGTGCAAAAGT	9.1	3.7e-06	-12507	5432		SM_b20683	SMc00679												SMa0347	6	188006	188893	D	1235412	-	SMa0347	NP_435433.1	295	COG0583	K	LysR family transcriptional regulator (plasmid)	3550		SMc02113	4	1597391	1598218	D	1233136	cysE	SMc02113	NP_385589.1	275
SM_b20344	R	SM_b20344_m1	R	-91	-73	GACAGAATTGGGCAAGAGT	21.2	3.7e-12	-26323	11432		SM_b20717	SMc00766												SMa0222	6	122050	122778	D	1235343	-	SMa0222	NP_435364.1	242	COG1802	K	GntR family transcriptional regulator (plasmid)	3481		SMc01651	4	2448176	2449084	D	1233929	-	SMc01651	NP_386369.1	302
SMc04348	R	SM_b20344_m4	R	-219	-200	ATTACGAAAATATAATGATC	8.6	3.8e-06	-12481	5420		SM_b20722	SMc00785												SMa0097	6	50138	51079	R	1235274	-	SMa0097	NP_435295.1	313	COG0583	K	LysR family transcriptional regulator (plasmid)	3410		SMc01615	4	2405599	2406384	R	1233893	-	SMc01615	NP_386333.1	261
SMc03251	R	SM_b20344_m4	R	-85	-66	ATGATCACGTTTCGATGAAC	8.5	4.0e-06	-12429	5398		SM_b20817	SMc00794												SMc04315	5	2133224	2134072	D	1233635	-	SMc04315	NP_386076.1	282	COG0583	K	transcriptional regulator	1977		SMc01488	4	2247640	2248137	R	1233750	-	SMc01488	NP_386190.2	165
SMa1954	D	SM_b20344_m4	D	-36	-17	GTTCTCATCTTAAACTGAAC	7.2	8.9e-06	-11629	5051		SM_b20818	SMc00820												SMc04162	5	2151826	2152155	R	1233656	-	SMc04162	NP_386097.1	109	COG0640	K	transcriptional regulator	1999		SMc01443	4	2287457	2288062	R	1233792	gst6	SMc01443	NP_386232.1	201
SM_b20344	R	SM_b20344_m4	R	-70	-51	ATTATCACATTATTCTGATC	23.0	4.6e-13	-28408	12337		SM_b20819	SMc00831												SMc04055	5	3057996	3058952	R	1234515	-	SMc04055	NP_386944.1	318	COG0583	K	transcriptional regulator	2847		SMc01403	4	2244554	2245018	R	1233746	-	SMc01403	NP_386186.1	154
SMa1918	D	SM_b20344_m5	D	-293	-281	AAAATGTGAAAAT	7.1	9.4e-06	-11575	5027		SM_b20820	SMc00877												SMc04011	5	3005682	3007223	R	1234471	tacA	SMc04011	NP_386901.1	513	COG2204	T	sigma-54-dependent transcription regulator protein	2804		SMc01260	4	1515627	1516013	D	1233057	-	SMc01260	NP_385510.1	128
SM_b20106	D	SM_b20344_m5	D	-66	-54	TTAATGTGTTAGT	9.4	2.6e-06	-12860	5585		SM_b20827	SMc00878												SMc02888	5	243152	244174	R	1231845	-	SMc02888	NP_384319.1	340	COG2207	K	transcriptional regulator	214		SMc01229	4	1695483	1695992	R	1233216	-	SMc01229	NP_385668.1	169
SMc03123	D	SM_b20347_m1	D	-131	-119	ATGTCGTCAGACG	9.1	8.8e-06	-11641	5056		SM_b20843	SMc00879												SMc02340	5	2761391	2762125	D	1234236	-	SMc02340	NP_386674.1	244	COG2188	K	transcriptional regulator	2578		SMc01225	4	1699144	1700052	R	1233220	-	SMc01225	NP_385672.1	302
SMa0636	D	SM_b20347_m1	D	-270	-258	TTATCGTCACACG	9.1	8.1e-06	-11724	5092		SM_b20859	SMc00929												SMc00878	5	908239	908979	D	1232469	-	SMc00878	NP_384934.1	246	COG2771	K	transcriptional regulator	830		SMc01168	4	1761019	1761480	D	1233283	-	SMc01168	NP_385731.1	153
SM_b20347	R	SM_b20347_m1	R	-47	-35	ATTTCGTCAGTCG	15.3	3.6e-08	-17140	7444		SM_b20869	SMc00953												SMc00877	5	909133	909966	D	1232470	-	SMc00877	NP_384935.1	277	COG2197	TK	transcriptional regulator	831		SMc00941	4	1769334	1769552	R	1233292	-	SMc00941	NP_385739.1	72
SMc00785	D	SM_b20347_m2	D	-40	-23	TATGATGAGGCACGAATT	5.2	9.7e-06	-11543	5013		SM_b20896	SMc00994												SMc00429	5	377524	378333	R	1231982	-	SMc00429	NP_384454.1	269	COG2207	K	transcriptional regulator	349		SMc00678	4	2897746	2898231	R	1234369	-	SMc00678	NP_386800.2	161
SM_b20347	R	SM_b20347_m2	R	-30	-13	GATGATGAGTGACGAATT	16.7	6.8e-09	-18806	8167		SM_b20901	SMc01092												SM_b21533	5	1059672	1060457	D	1237304	-	SM_b21533	NP_437513.1	261	COG1349	KG	GntR family transcriptional regulator (plasmid)	5622		SMc00280	4	1850238	1850444	D	1233368	-	SMc00280	NP_385814.1	68
SMc02340	D	SM_b20347_m3	D	-151	-126	TGTAACGTTGTACGTACATCGTAATC	0.7	8.5e-06	-11675	5071		SM_b20914	SMc01168												SM_b21299	5	880615	881406	D	1237134	deoR	SM_b21299	NP_437343.1	263	COG1349	KG	DeoR family transcriptional regulator (plasmid)	5454		SMc00163	4	2002291	2003313	D	1233509	-	SMc00163	NP_385950.1	340
SM_b20347	R	SM_b20347_m3	R	-66	-41	TCAGTCGTAATCCGATAATCGTGACT	8.6	2.0e-07	-15425	6699		SM_b20947	SMc01225												SM_b21169	5	916402	916827	D	1237166	-	SM_b21169	NP_437375.1	141	COG0640	K	ArsR family transcriptional regulator (plasmid)	5486		SM_b21683	4	1331308	1331499	R	1237558	-	SM_b21683	NP_437766.1	63
SM_b20347	R	SM_b20347_m3	R	-52	-27	AATTTTGAATTTCGTCAGTCGTAATC	3.1	3.0e-06	-12717	5523		SM_b20953	SMc01226												SM_b21021	5	644175	645122	D	1236925	-	SM_b21021	NP_437134.1	315	COG2390	K	transcriptional regulator (plasmid)	5247		SM_b21533	4	1059672	1060457	D	1237304	-	SM_b21533	NP_437513.1	261
SM_b20347	R	SM_b20347_m3	R	-45	-20	AGTGACGAATTTTGAATTTCGTCAGT	28.7	1.5e-14	-31831	13824		SM_b21021	SMc01260												SM_b20392	5	405680	406387	R	1236709	-	SM_b20392	NP_436918.1	235	COG2186	K	transcriptional regulator NanR (plasmid)	5029		SM_b21464	4	1391174	1391947	D	1237622	-	SM_b21464	NP_437830.1	257
SMc03140	R	SM_b20347_m4	R	-169	-152	ATGTTGTCAGTTGTCTTA	8.2	8.0e-06	-11736	5097		SM_b21079	SMc01403												SM_b20366	5	378030	379034	D	1236683	-	SM_b20366	NP_436892.1	334	COG1609	K	LacI family transcriptional regulator (plasmid)	5003		SM_b21442	4	1371498	1371947	R	1237603	-	SM_b21442	NP_437811.1	149
SM_b20347	R	SM_b20347_m4	R	-73	-56	TAATCGTGACTTGTCAAC	13.1	2.2e-07	-15330	6658		SM_b21093	SMc01406												SM_b20154	5	170752	171738	R	1236485	-	SM_b20154	NP_436694.1	328	COG1609	K	transcriptional regulator (plasmid)	4804		SM_b21291	4	867060	868007	R	1237126	-	SM_b21291	NP_437335.1	315
SM_b20347	R	SM_b20347_m4	R	-52	-35	ATTTCGTCAGTCGTAATC	19.1	1.8e-10	-22438	9745		SM_b21102	SMc01495												SM_b20106	5	116824	117555	D	1236397	-	SM_b20106	NP_436646.1	243	COG2186	K	transcriptional regulator (plasmid)	4756		SM_b21180	4	926839	927792	R	1237177	-	SM_b21180	NP_437386.1	317
SMc01651	D	SM_b20347_m5	D	-74	-60	ACGAAATGCGTCAGC	8.1	8.7e-06	-11652	5060		SM_b21115	SMc01563												SMa1966	5	1118218	1119327	R	1236114	-	SMa1966	NP_436324.1	369	COG0583	K	LysR family transcriptional regulator (plasmid)	4437		SM_b21093	4	735413	736315	R	1237003	-	SM_b21093	NP_437212.1	300
SMc03123	D	SM_b20347_m5	D	-135	-121	CCGAATGTCGTCAGA	9.0	5.4e-06	-12129	5268		SM_b21117	SMc01592												SMa1954	5	1109860	1110843	D	1236106	-	SMa1954	NP_436316.1	327	COG0583	K	LysR family transcriptional regulator (plasmid)	4429		SM_b21021	4	644175	645122	D	1236925	-	SM_b21021	NP_437134.1	315
SMa1797	D	SM_b20347_m5	D	-297	-283	GCGAACTCCGTCAGT	10.1	2.5e-06	-12899	5602		SM_b21158	SMc01610												SMa0985	5	547525	548370	R	1235567	-	SMa0985	NP_435777.2	281	COG0583	K	LysR family transcriptional regulator (plasmid)	3895		SM_b20615	4	1633944	1635779	D	1237859	thiC	SM_b20615	NP_438067.1	611
SM_b20347	R	SM_b20347_m5	R	-45	-31	TTGAATTTCGTCAGT	18.0	9.6e-10	-20764	9018		SM_b21169	SMc01615												SMa0319	5	177973	178974	D	1235397	-	SMa0319	NP_435418.1	333	COG4977	K	AraC family transcriptional regulator (plasmid)	3534		SM_b20586	4	1601452	1602207	R	1237830	-	SM_b20586	NP_438038.1	251
SM_b20365	R	SM_b20366_m1	R	-164	-152	CTGCGTGCAAGGT	10.3	5.8e-06	-12058	5237		SM_b21180	SMc01630												SMa0190	5	104560	105189	D	1235325	-	SMa0190	NP_435346.1	209	COG1309	K	transcriptional regulator (plasmid)	3463		SM_b20525	4	550946	551554	D	1236836	-	SM_b20525	NP_437045.1	202
SM_b20365	R	SM_b20366_m1	R	-64	-52	GCGCGTGCAAATG	11.0	1.8e-06	-13228	5745		SM_b21208	SMc01651												SMc04051	4	3055204	3055740	R	1234511	rpoE4	SMc04051	NP_386940.1	178	COG1595	K	RNA polymerase sigma-E factor (sigma-24) protein	2843		SM_b20484	4	499835	500827	D	1236797	-	SM_b20484	NP_437006.1	330
SM_b20366	D	SM_b20366_m1	D	-130	-118	GCGCGTGCAAATG	11.0	1.8e-06	-13228	5745		SM_b21210	SMc01664												SMc03843	4	3508582	3508896	R	1234920	-	SMc03843	NP_387332.1	104	COG0640	K	transcriptional regulator	3244		SM_b20457	4	468904	470052	R	1236770	-	SM_b20457	NP_436979.1	382
SM_b20366	D	SM_b20366_m1	D	-30	-18	CTGCGTGCAAGGT	10.3	5.8e-06	-12058	5237		SM_b21222	SMc01728												SMc03210	4	3174933	3175412	R	1234618	-	SMc03210	NP_387047.1	159	COG1522	K	transcriptional regulator	2950		SM_b20347	4	354773	355381	R	1236664	-	SM_b20347	NP_436873.1	202
SMc01168	D	SM_b20366_m2	D	-41	-20	TTATTGCACAAAATTGCGACTA	9.3	5.0e-06	-12206	5301		SM_b21291	SMc01762												SMc01908	4	1370272	1370745	R	1232905	-	SMc01908	NP_385366.1	157	COG1846	K	transcriptional regulator	1265		SMa2263	4	1266525	1266860	D	1236256	-	SMa2263	NP_436465.1	111
SM_b20154	R	SM_b20366_m2	R	-235	-214	TGATTGCTCACGTGTGCATTTT	8.4	9.5e-06	-11564	5022		SM_b21295	SMc01819												SMc01728	4	474128	475240	D	1232071	ada	SMc01728	NP_384543.1	370	COG0350	L	transcriptional regulator	438		SMa2167	4	1221480	1221947	D	1236213	-	SMa2167	NP_436423.1	155
SM_b20365	R	SM_b20366_m2	R	-152	-131	CATTTGCAAAATAGTGCAATTC	15.5	2.7e-08	-17427	7569		SM_b21299	SMc01908												SMc01664	4	2466631	2467476	D	1233942	-	SMc01664	NP_386382.1	281	COG0583	K	transcriptional regulator	2285		SMa2049	4	1158529	1159611	D	1236156	-	SMa2049	NP_436366.1	360
SM_b20365	R	SM_b20366_m2	R	-142	-121	GCGTTGCACGCATTTGCAAAAT	14.5	7.3e-08	-16433	7137		SM_b21300	SMc01945												SMc00929	4	898303	899283	R	1232460	-	SMc00929	NP_384925.1	326	COG0583	K	transcriptional regulator	821		SMa1954	4	1109860	1110843	D	1236106	-	SMa1954	NP_436316.1	327
SM_b20365	R	SM_b20366_m2	R	-64	-43	TTTTTGCAAGCGCGTGCAAATG	18.3	1.8e-10	-22438	9745		SM_b21333	SMc01975												SMc00256	4	1824818	1825825	R	1233344	-	SMc00256	NP_385790.1	335	COG4977	K	transcriptional regulator	1689		SMa1442	4	795334	796098	R	1235824	-	SMa1442	NP_436034.1	254
SM_b20366	D	SM_b20366_m2	D	-139	-118	TTTTTGCAAGCGCGTGCAAATG	18.3	1.8e-10	-22438	9745		SM_b21336	SMc02030												SMc00109	4	1071584	1072051	R	1232622	-	SMc00109	NP_385085.1	155	COG0789	K	transcriptional regulator	982		SMa1334	4	729038	730234	R	1235765	-	SMa1334	NP_435975.1	398
SM_b20366	D	SM_b20366_m2	D	-61	-40	GCGTTGCACGCATTTGCAAAAT	14.5	7.3e-08	-16433	7137		SM_b21345	SMc02140												SMc00107	4	1067701	1068414	R	1232617	-	SMc00107	NP_385080.1	237	COG2378	K	transcriptional regulator	977		SMa1201	4	661252	661632	R	1235692	-	SMa1201	NP_435902.1	126
SM_b20366	D	SM_b20366_m2	D	-51	-30	CATTTGCAAAATAGTGCAATTC	15.5	2.7e-08	-17427	7569		SM_b21346	SMc02172												SM_b21291	4	867060	868007	R	1237126	-	SM_b21291	NP_437335.1	315	COG0583	K	LysR family transcriptional regulator (plasmid)	5446		SMa1136	4	619852	620313	D	1235650	-	SMa1136	NP_435860.1	153
SMc01168	D	SM_b20366_m3	D	-41	-20	TTATTGCACAAAATTGCGACTA	9.4	3.3e-06	-12622	5481		SM_b21359	SMc02175												SM_b21180	4	926839	927792	R	1237177	-	SM_b21180	NP_437386.1	317	COG0583	K	LysR family transcriptional regulator (plasmid)	5497		SMa0846	4	465363	465620	D	1235496	-	SMa0846	NP_435706.1	85
SM_b20154	R	SM_b20366_m3	R	-235	-214	TGATTGCTCACGTGTGCATTTT	8.3	6.2e-06	-11991	5208		SM_b21372	SMc02223												SM_b21158	4	901638	902501	D	1237155	-	SM_b21158	NP_437364.1	287	COG1737	K	transcriptional regulator (plasmid)	5475		SMa0831	4	459663	460163	D	1235489	nifX	SMa0831	NP_435699.1	166
SM_b20365	R	SM_b20366_m3	R	-152	-131	CATTTGCAAAATAGTGCAATTC	15.8	2.5e-08	-17504	7602		SM_b21385	SMc02261												SM_b20717	4	1520541	1521566	R	1237756	-	SM_b20717	NP_437964.1	341	COG1609	K	LacI family transcriptional regulator (plasmid)	6072		SMa0829	4	456142	457683	D	1235487	nifK	SMa0829	NP_435697.1	513
SM_b20365	R	SM_b20366_m3	R	-142	-121	GCGTTGCACGCATTTGCAAAAT	14.8	6.2e-08	-16596	7208		SM_b21400	SMc02323												SM_b20525	4	550946	551554	D	1236836	-	SM_b20525	NP_437045.1	202	COG1309	K	transcriptional regulator (plasmid)	5158		SMa0814	4	444206	445678	R	1235478	nifB	SMa0814	NP_435688.1	490
SM_b20365	R	SM_b20366_m3	R	-64	-43	TTTTTGCAAGCGCGTGCAAATG	18.6	1.8e-10	-22438	9745		SM_b21442	SMc02340												SM_b20441	4	452507	453247	D	1236754	-	SM_b20441	NP_436963.1	246	COG2186	K	transcriptional regulator (plasmid)	5074		SMa0751	4	404204	405442	D	1235220	-	SMa0751	NP_435646.1	412
SM_b20366	D	SM_b20366_m3	D	-139	-118	TTTTTGCAAGCGCGTGCAAATG	18.6	1.8e-10	-22438	9745		SM_b21464	SMc02366												SM_b20367	4	379530	380222	R	1236684	-	SM_b20367	NP_436893.1	230	COG1309	K	transcriptional regulator (plasmid)	5004		SMa0750	4	403178	404056	R	1235219	-	SMa0750	NP_435645.1	292
SM_b20366	D	SM_b20366_m3	D	-61	-40	GCGTTGCACGCATTTGCAAAAT	14.8	6.2e-08	-16596	7208		SM_b21484	SMc02470												SM_b20219	4	227578	228315	R	1236543	-	SM_b20219	NP_436752.1	245	COG0745	TK	response regulator protein (plasmid)	4862		SMa0748	4	402138	402587	D	1235218	-	SMa0748	NP_435644.2	149
SM_b20366	D	SM_b20366_m3	D	-51	-30	CATTTGCAAAATAGTGCAATTC	15.8	2.5e-08	-17504	7602		SM_b21493	SMc02523												SM_b20055	4	63995	64984	D	1236346	-	SM_b20055	NP_436595.1	329	COG4977	K	transcriptional regulator (plasmid)	4704		SMa0690	4	373456	374856	R	1235186	-	SMa0690	NP_435612.1	466
SM_b20365	R	SM_b20366_m4	R	-174	-154	GCGTGCAAGGTCGAGGAGAGA	8.9	6.5e-06	-11944	5187		SM_b21521	SMc02560												SMa2215	4	1240820	1241587	D	1236232	-	SMa2215	NP_436441.1	255	COG2188	K	GntR family transcriptional regulator (plasmid)	4553		SMa0636	4	341499	342152	D	1235154	-	SMa0636	NP_435580.1	217
SM_b20365	R	SM_b20366_m4	R	-152	-132	ATTTGCAAAATAGTGCAATTC	15.1	3.9e-08	-17060	7409		SM_b21533	SMc02584												SMa2163	4	1218608	1219489	D	1236211	-	SMa2163	NP_436421.2	293	COG4977	K	AraC family transcriptional regulator (plasmid)	4533		SMa0520	4	280693	281535	D	1235094	-	SMa0520	NP_435520.1	280
SM_b20365	R	SM_b20366_m4	R	-142	-122	CGTTGCACGCATTTGCAAAAT	12.9	3.9e-07	-14757	6409		SM_b21535	SMc02647												SMa1948	4	1105815	1106531	D	1236102	-	SMa1948	NP_436312.1	238	COG0664	T	Crp family transcriptional regulator (plasmid)	4425		SMa0222	4	122050	122778	D	1235343	-	SMa0222	NP_435364.1	242
SM_b20365	R	SM_b20366_m4	R	-64	-44	TTTTGCAAGCGCGTGCAAATG	18.6	5.0e-11	-23719	10301		SM_b21569	SMc02851												SMa1387	4	764198	765112	D	1235796	-	SMa1387	NP_436006.1	304	COG0583	K	LysR family transcriptional regulator (plasmid)	4123		SMa0193	4	106326	106652	R	1235327	-	SMa0193	NP_435348.2	108
SM_b20366	D	SM_b20366_m4	D	-138	-118	TTTTGCAAGCGCGTGCAAATG	18.6	5.0e-11	-23719	10301		SM_b21574	SMc02888												SMa0849	4	466418	467398	D	1235498	syrM	SMa0849	NP_435708.1	326	COG0583	K	SyrM transcriptional regulator (plasmid)	3825		SMa0062	4	32634	33323	D	1235254	-	SMa0062	NP_435275.1	229
SM_b20366	D	SM_b20366_m4	D	-60	-40	CGTTGCACGCATTTGCAAAAT	12.9	3.9e-07	-14757	6409		SM_b21579	SMc02893												SMa0520	4	280693	281535	D	1235094	-	SMa0520	NP_435520.1	280	COG1737	K	RpiR family transcriptional regulator (plasmid)	3635		SMc04337	3	2145064	2145366	D	1233648	-	SMc04337	NP_386089.1	100
SM_b20366	D	SM_b20366_m4	D	-50	-30	ATTTGCAAAATAGTGCAATTC	15.1	3.9e-08	-17060	7409		SM_b21598	SMc03015												SMc03170	3	3131057	3131896	D	1234578	-	SMc03170	NP_387007.1	279	COG2207	K	transcriptional regulator	2910		SMc04054	3	3057168	3057929	D	1234514	-	SMc04054	NP_386943.1	253
SM_b20366	D	SM_b20366_m4	D	-28	-8	GCGTGCAAGGTCGAGGAGAGA	8.9	6.5e-06	-11944	5187		SM_b21640	SMc03046												SMc03015	3	714089	714826	D	1232286	-	SMc03015	NP_384753.1	245	COG2197	TK	transcriptional regulator	649		SMc03890	3	3557698	3558480	R	1234967	-	SMc03890	NP_387379.1	260
SMc04134	D	SM_b20366_m5	D	-51	-23	GTTGCACCCGAATGCCGCTAAAGGCAAGA	10.0	2.0e-06	-13122	5699		SM_b21641	SMc03060												SMc02261	3	625996	626610	D	1232202	-	SMc02261	NP_384671.1	204	COG1309	K	transcriptional regulator	566		SMc03794	3	3460182	3460433	D	1234870	-	SMc03794	NP_387283.1	83
SM_b20365	R	SM_b20366_m5	R	-151	-123	GTTGCACGCATTTGCAAAATAGTGCAATT	24.0	5.0e-14	-30627	13301		SM_b21647	SMc03092												SMc01819	3	2642750	2643391	R	1234119	-	SMc01819	NP_386558.1	213	COG1309	K	transcriptional regulator	2462		SMc03123	3	3207160	3208107	D	1234647	-	SMc03123	NP_387076.1	315
SM_b20365	R	SM_b20366_m5	R	-92	-64	GCTGCACGAGGATACGGGGAGTGTCAATA	17.9	1.8e-09	-20135	8745		SM_b21649	SMc03122												SMc00766	3	778588	779463	D	1232349	-	SMc00766	NP_384816.1	291	COG0583	K	transcriptional regulator	712		SMc03101	3	3242113	3242601	R	1234676	-	SMc03101	NP_387098.1	162
SM_b20366	D	SM_b20366_m5	D	-118	-90	GCTGCACGAGGATACGGGGAGTGTCAATA	17.9	1.8e-09	-20135	8745		SM_b21650	SMc03123												SMc00658	3	2919147	2919890	R	1234390	-	SMc00658	NP_386820.1	247	COG2771	K	transcriptional regulator	2723		SMc02647	3	1173182	1173595	R	1232721	-	SMc02647	NP_385183.1	137
SM_b20366	D	SM_b20366_m5	D	-59	-31	GTTGCACGCATTTGCAAAATAGTGCAATT	24.0	5.0e-14	-30627	13301		SM_b21683	SMc03140												SMc00458	3	1104977	1105648	D	1232657	feuP	SMc00458	NP_385120.1	223	COG0745	TK	transcriptional regulator	1017		SMc02589	3	79804	81030	R	1231695	-	SMc02589	NP_384176.1	408
SMa2263	D	SM_b20367_m1	D	-41	-21	TGATCGACGGTTGGACTTTTT	9.5	8.9e-07	-13932	6051		SM_b21706	SMc03169												SM_b21649	3	1680394	1681335	D	1237900	agpT	SM_b21649	NP_438108.1	313	COG2207	K	AraC family transcriptional regulator (plasmid)	6216		SMc02584	3	72733	73317	R	1231690	actR	SMc02584	NP_384171.1	194
SM_b20154	R	SM_b20367_m1	R	-261	-241	TGACAAACGGACGGTCTGAAT	11.5	2.8e-07	-15088	6553		SMc00041	SMc03170												SM_b21210	3	963136	963807	R	1237207	-	SM_b21210	NP_437416.1	223	COG0745	TK	two-component response regulator protein (plasmid)	5525		SMc02523	3	3268382	3269278	R	1234696	-	SMc02523	NP_387118.1	298
SM_b20367	R	SM_b20367_m1	R	-95	-75	AGACCGACGGTCGGTCTAATG	20.4	1.4e-10	-22689	9854		SMc00095	SMc03210												SM_b21079	3	716513	717244	D	1236989	-	SM_b21079	NP_437198.1	243	COG0664	T	transcriptional regulator (plasmid)	5311		SMc02223	3	584615	585271	R	1232165	-	SMc02223	NP_384634.1	218
SM_b20367	R	SM_b20367_m1	R	-91	-71	TTATAGACCGACGGTCGGTCT	18.4	1.6e-09	-20253	8796		SMc00107	SMc03258												SMa5007	3	550344	550724	R	6435273	-	SMa5007	YP_002000351.1	126	COG5499	V	transcriptional regulator (plasmid)	3899		SMc01989	3	2714977	2715375	D	1234191	-	SMc01989	NP_386629.1	132
SMa2263	D	SM_b20367_m2	D	-41	-21	TGATCGACGGTTGGACTTTTT	6.0	9.0e-06	-11618	5046		SMc00109	SMc03820												SMa2015	3	1141886	1142407	R	1236140	-	SMa2015	NP_436350.1	173	COG0583	K	transcriptional regulator (plasmid)	4462		SMc01982	3	2706406	2707350	D	1234184	coxM	SMc01982	NP_386622.1	314
SM_b20154	R	SM_b20367_m2	R	-261	-241	TGACAAACGGACGGTCTGAAT	11.8	3.6e-07	-14837	6444		SMc00116	SMc03843												SMa0307	3	172016	173002	R	1235391	-	SMa0307	NP_435412.1	328	COG0583	K	LysR family transcriptional regulator (plasmid)	3528		SMc01728	3	474128	475240	D	1232071	ada	SMc01728	NP_384543.1	370
SM_b20367	R	SM_b20367_m2	R	-95	-75	AGACCGACGGTCGGTCTAATG	16.6	9.8e-09	-18441	8009		SMc00118	SMc03890												SMa0179	3	98400	99317	R	1235319	-	SMa0179	NP_435340.1	305	COG0583	K	LysR family transcriptional regulator (plasmid)	3457		SMc01630	3	2422399	2423202	R	1233908	-	SMc01630	NP_386348.1	267
SM_b20367	R	SM_b20367_m2	R	-91	-71	TTATAGACCGACGGTCGGTCT	19.9	1.2e-10	-22844	9921		SMc00146	SMc03998												SMc04882	2	3582240	3583133	R	1234981	-	SMc04882	NP_387393.1	297	COG0583	K	transcriptional regulator	3305		SMc01406	3	2248249	2249667	R	1233751	-	SMc01406	NP_386191.1	472
SM_b20154	R	SM_b20367_m3	R	-259	-239	GTTGACAAACGGACGGTCTGA	10.2	6.7e-07	-14216	6174		SMc00163	SMc04011												SMc02140	2	572383	573066	D	1232151	phoB	SMc02140	NP_384621.1	227	COG0745	TK	phosphate regulon transcriptional regulatory protein	516		SMc01267	3	1507415	1509364	D	1233050	-	SMc01267	NP_385503.1	649
SM_b20367	R	SM_b20367_m3	R	-93	-73	ATAGACCGACGGTCGGTCTAA	24.7	4.5e-13	-28430	12347		SMc00241	SMc04032												SMc01563	2	2501869	2503923	R	1233981	sigA	SMc01563	NP_386420.1	684	COG0568	K	RNA polymerase sigma factor RpoD	2323		SMc01118	3	437108	437764	D	1232036	-	SMc01118	NP_384508.1	218
SMa0355	D	SM_b20367_m4	D	-64	-55	GAATTAGAGC	11.0	5.4e-06	-12129	5268		SMc00251	SMc04051												SMc01168	2	1761019	1761480	D	1233283	-	SMc01168	NP_385731.1	153	COG1522	K	transcriptional regulator	1630		SMc00879	3	907157	908011	D	1232468	-	SMc00879	NP_384933.1	284
SMa2263	D	SM_b20367_m5	D	-41	-21	TGATCGACGGTTGGACTTTTT	7.5	3.7e-06	-12507	5432		SMc00256	SMc04055												SMc00994	2	944917	945732	D	1232503	-	SMc00994	NP_384968.2	271	COG1917	R	transcriptional regulator	864		SMc00828	3	849289	849795	R	1232414	-	SMc00828	NP_384879.1	168
SM_b20154	R	SM_b20367_m5	R	-261	-241	TGACAAACGGACGGTCTGAAT	12.5	2.1e-07	-15376	6678		SMc00270	SMc04109												SMc00678	2	2897746	2898231	R	1234369	-	SMc00678	NP_386800.2	161	COG1522	K	transcriptional regulator	2703		SMc00766	3	778588	779463	D	1232349	-	SMc00766	NP_384816.1	291
SM_b20367	R	SM_b20367_m5	R	-95	-75	AGACCGACGGTCGGTCTAATG	18.8	8.8e-10	-20851	9056		SMc00275	SMc04134												SM_b21706	2	1655215	1656018	R	1237879	-	SM_b21706	NP_438087.1	267	COG1609	K	LacI family transcriptional regulator (plasmid)	6195		SM_b21649	3	1680394	1681335	D	1237900	agpT	SM_b21649	NP_438108.1	313
SM_b20367	R	SM_b20367_m5	R	-91	-71	TTATAGACCGACGGTCGGTCT	18.4	1.4e-09	-20387	8854		SMc00277	SMc04143												SM_b21093	2	735413	736315	R	1237003	-	SM_b21093	NP_437212.1	300	COG0583	K	LysR family transcriptional regulator (plasmid)	5325		SM_b21647	3	1676356	1678437	R	1237898	agpA	SM_b21647	NP_438106.1	693
SMa2015	R	SM_b20375_m1	R	-89	-69	GTTTCTGGTCAGACCATGTGG	14.4	5.6e-08	-16698	7252		SMc00278	SMc04162												SM_b20516	2	541280	541606	D	1236828	-	SM_b20516	NP_437037.1	108			response regulator protein (plasmid)	5150		SM_b21579	3	1119502	1119945	D	1237350	hmrR2	SM_b21579	NP_437559.1	147
SM_b20375	R	SM_b20375_m1	R	-33	-13	CCAACTGGTATTACCAGTAAG	20.9	3.2e-11	-24165	10495		SMc00280	SMc04163												SMa2049	2	1158529	1159611	D	1236156	-	SMa2049	NP_436366.1	360	COG1879	G	LacI family transcriptional regulator (plasmid)	4479		SM_b21400	3	1331585	1331821	D	1237559	-	SM_b21400	NP_437767.1	78
SM_b20441	D	SM_b20375_m1	D	-58	-38	GGAATTGGTATGACCACTTGG	13.3	1.4e-07	-15782	6854		SMc00329	SMc04203												SMa1893	2	1075895	1076770	D	1236077	-	SMa1893	NP_436287.1	291	COG0583	K	LysR family transcriptional regulator (plasmid)	4400		SM_b21336	3	1002815	1003759	D	1237243	-	SM_b21336	NP_437452.1	314
SMa0789	D	SM_b20375_m2	D	-132	-112	GCAACTGGTCATGGCAGTTGC	6.9	8.2e-06	-11711	5086		SMc00429	SMc04264												SMa1299	2	709054	709665	D	1235743	-	SMa1299	NP_435953.1	203	COG1309	K	TetR family transcriptional regulator (plasmid)	4068		SM_b21333	3	1000124	1000483	D	1237240	-	SM_b21333	NP_437449.1	119
SMa2015	R	SM_b20375_m2	R	-89	-69	GTTTCTGGTCAGACCATGTGG	11.7	3.8e-07	-14783	6420		SMc00458	SMc04315												SMa0355	2	191922	192416	D	1235416	-	SMa0355	NP_435437.2	164	COG0583	K	LysR family transcriptional regulator (plasmid)	3554		SM_b21295	3	871579	872163	R	1237130	-	SM_b21295	NP_437339.1	194
SM_b20375	R	SM_b20375_m2	R	-33	-13	CCAACTGGTATTACCAGTAAG	22.1	1.1e-11	-25233	10959		SMc00479	SMc04348												SMc02175	1	520434	521138	R	1232107	-	SMc02175	NP_384578.1	234	COG0664	T	transcriptional regulator	473		SM_b21169	3	916402	916827	D	1237166	-	SM_b21169	NP_437375.1	141
SM_b20441	D	SM_b20375_m2	D	-58	-38	GGAATTGGTATGACCACTTGG	14.4	4.5e-08	-16917	7347		SMc00490	SMc04882																											SM_b21079	3	716513	717244	D	1236989	-	SM_b21079	NP_437198.1	243
SMa1136	D	SM_b20375_m3	D	-80	-58	CTGGTCCGGCGACGGGGCTGAGT	9.1	5.9e-06	-12041	5229		SMc00529																												SM_b20953	3	1180716	1181099	D	1237409	-	SM_b20953	NP_437618.1	127
SMa1387	D	SM_b20375_m3	D	-176	-154	CTGCTCGCGCACCTGATCTGAAC	8.7	7.9e-06	-11749	5102		SMc00654																				SMc04203	NP_386137.1	159	COG1595	K	RNA polymerase sigma factor FECI protein			SM_b20869	3	1276480	1277181	D	1237494	-	SM_b20869	NP_437703.1	233
SMa1966	R	SM_b20375_m3	R	-170	-148	GCGATCCTTCGCCTGAACTTACA	8.7	7.9e-06	-11749	5102		SMc00658																				SM_b21484	NP_437851.1	173	COG1595	K	RNA polymerase sigma-E factor (sigma-24) protein (plasmid)			SM_b20717	3	1520541	1521566	R	1237756	-	SM_b20717	NP_437964.1	341
SM_b20347	R	SM_b20375_m4	R	-149	-140	TCATACCAGT	11.9	8.8e-07	-13943	6056		SMc00672																				SM_b20531	NP_437050.1	178	COG1595	K	RNA polymerase sigma factor (plasmid)			SM_b20537	3	561216	562244	R	1236847	-	SM_b20537	NP_437056.1	342
SM_b20392	R	SM_b20375_m4	R	-103	-94	TTATACCAGT	12.2	6.1e-07	-14310	6215		SMc00678																				SM_b20592	NP_438044.1	227	COG1595	K	RNA polymerase sigma factor (plasmid)			SM_b20531	3	554980	555516	D	1236841	-	SM_b20531	NP_437050.1	178
SMc02470	D	SM_b20392_m1	D	-76	-48	TTAATTCGTATTCCTGCTAAATGATTTGA	0.3	6.6e-06	-11928	5180		SMc00679																				SMc04051	NP_386940.1	178	COG1595	K	RNA polymerase sigma-E factor (sigma-24) protein			SM_b20426	3	440994	442274	D	1236743	-	SM_b20426	NP_436952.1	426
SMa1749	R	SM_b20392_m1	R	-129	-101	TTGACTCGTATTCTCATTTTATTTGCAAA	2.8	2.3e-06	-12983	5638		SMc00766																				SMc01563	NP_386420.1	684	COG0568	K	RNA polymerase sigma factor RpoD			SM_b20425	3	440290	440784	R	1236742	-	SM_b20425	NP_436951.1	164
SM_b20347	R	SM_b20392_m1	R	-152	-124	TATACTCATTGACTCATCATACCAGTTCC	11.8	2.9e-08	-17356	7538		SMc00785																												SM_b20276	3	280415	281305	D	1236597	-	SM_b20276	NP_436806.1	296
SM_b20392	R	SM_b20392_m1	R	-106	-78	CTAACTCAGATACTCATTATACCAGTTTC	22.6	2.1e-11	-24586	10678		SMc00794																												SM_b20232	3	237509	238453	D	1236554	-	SM_b20232	NP_436763.1	314
SM_b20375	R	SM_b20392_m2	R	-34	-14	CAACTGGTATTACCAGTAAGC	4.5	5.8e-07	-14360	6237		SMc00800																												SM_b20162	3	180077	180766	D	1236493	-	SM_b20162	NP_436702.1	229
SM_b20425	R	SM_b20425_m2	R	-57	-46	ATGACATTGGGT	10.6	4.2e-06	-12380	5377		SMc00820																												SM_b20106	3	116824	117555	D	1236397	-	SM_b20106	NP_436646.1	243
SM_b20426	D	SM_b20425_m2	D	-168	-157	ATGACATTGGGT	10.6	4.2e-06	-12380	5377		SMc00828																												SMa5030	3	730316	730981	D	6435274	-	SMa5030	YP_002000352.1	221
SMc03820	R	SM_b20425_m3	R	-52	-30	CAAAACTAACTCAAATGCCGATC	4.3	4.8e-06	-12247	5319		SMc00831																												SMa2303	3	1283423	1284649	R	1236277	-	SMa2303	NP_436486.1	408
SMc02642	D	SM_b20425_m4	D	-155	-127	GCCAATTGAGATGTAATCCGCTTCCGTCA	7.8	7.7e-06	-11774	5114		SMc00864																												SMa1480	3	814015	814902	D	1235842	-	SMa1480	NP_436052.2	295
SM_b20425	R	SM_b20425_m4	R	-101	-73	GTCAATTGAGCTGATTTTGATCACTGTTC	16.6	7.1e-09	-18763	8149		SMc00877																												SMa1387	3	764198	765112	D	1235796	-	SMa1387	NP_436006.1	304
SM_b20425	R	SM_b20425_m4	R	-76	-48	GACATTGGGTGCTCACTTTTACATTGTCA	18.1	1.3e-09	-20461	8886		SMc00878																												SMa1299	3	709054	709665	D	1235743	-	SMa1299	NP_435953.1	203
SM_b20426	D	SM_b20425_m4	D	-166	-138	GACATTGGGTGCTCACTTTTACATTGTCA	18.1	1.3e-09	-20461	8886		SMc00879																												SMa1211	3	665557	667131	R	1235697	fixG	SMa1211	NP_435907.1	524
SM_b20426	D	SM_b20425_m4	D	-141	-113	GTCAATTGAGCTGATTTTGATCACTGTTC	16.6	7.1e-09	-18763	8149		SMc00886																												SMa1141	3	621245	622009	D	1235653	-	SMa1141	NP_435863.1	254
SMc04054	D	SM_b20425_m5	D	-172	-143	GCATTCAGCTTTAACTTATATTCGATCACG	8.3	2.5e-06	-12899	5602		SMc00929																												SMa0815	3	445895	447520	R	1235479	nifA	SMa0815	NP_435689.2	541
SM_b20425	R	SM_b20425_m5	R	-104	-75	CAATTGAGCTGATTTTGATCACTGTTCAAA	19.0	6.4e-10	-21170	9194		SMc00938																												SMa0347	3	188006	188893	D	1235412	-	SMa0347	NP_435433.1	295
SM_b20425	R	SM_b20425_m5	R	-97	-68	ACATTGTCAATTGAGCTGATTTTGATCACT	20.4	1.1e-10	-22931	9959		SMc00941																												SMa0319	3	177973	178974	D	1235397	-	SMa0319	NP_435418.1	333
SM_b20425	R	SM_b20425_m5	R	-78	-49	ACATTGGGTGCTCACTTTTACATTGTCAAT	23.1	8.7e-13	-27770	12060		SMc00942																												SMa0307	3	172016	173002	R	1235391	-	SMa0307	NP_435412.1	328
SM_b20426	D	SM_b20425_m5	D	-165	-136	ACATTGGGTGCTCACTTTTACATTGTCAAT	23.1	8.7e-13	-27770	12060		SMc00949																												SMa0267	3	150483	151175	D	1235367	-	SMa0267	NP_435388.1	230
SM_b20426	D	SM_b20425_m5	D	-146	-117	ACATTGTCAATTGAGCTGATTTTGATCACT	20.4	1.1e-10	-22931	9959		SMc00953																												SMa0190	3	104560	105189	D	1235325	-	SMa0190	NP_435346.1	209
SM_b20426	D	SM_b20425_m5	D	-139	-110	CAATTGAGCTGATTTTGATCACTGTTCAAA	19.0	6.4e-10	-21170	9194		SMc00994																												SMa0123	3	65729	66112	R	1235288	-	SMa0123	NP_435309.1	127
SM_b20425	R	SM_b20426_m1	R	-79	-66	TTACATTGTCAATT	14.6	4.5e-08	-16917	7347		SMc01004																												SMa0065	3	35455	36147	D	1235257	-	SMa0065	NP_435278.1	230
SM_b20426	D	SM_b20426_m1	D	-148	-135	TTACATTGTCAATT	14.6	4.5e-08	-16917	7347		SMc01092																												SMc04882	2	3582240	3583133	R	1234981	-	SMc04882	NP_387393.1	297
SMc00654	D	SM_b20426_m2	D	-142	-115	TTTAACATTTTCGATACACCTTGCCAGA	0.7	2.6e-06	-12860	5585		SMc01106																												SMc04363	2	2242227	2243069	R	1233744	-	SMc04363	NP_386184.1	280
SM_b20425	R	SM_b20426_m2	R	-91	-64	TTTTACATTGTCAATTGAGCTGATTTTG	13.0	8.3e-09	-18607	8081		SMc01118																												SMc04319	2	2222299	2222586	D	1233724	-	SMc04319	NP_386164.1	95
SM_b20426	D	SM_b20426_m2	D	-150	-123	TTTTACATTGTCAATTGAGCTGATTTTG	13.0	8.3e-09	-18607	8081		SMc01168																												SMc04315	2	2133224	2134072	D	1233635	-	SMc04315	NP_386076.1	282
SM_b20425	R	SM_b20426_m3	R	-101	-73	GTCAATTGAGCTGATTTTGATCACTGTTC	15.9	1.3e-08	-18158	7886		SMc01182																												SMc04161	2	2151324	2151794	R	1233655	-	SMc04161	NP_386096.1	156
SM_b20425	R	SM_b20426_m3	R	-76	-48	GACATTGGGTGCTCACTTTTACATTGTCA	17.7	1.6e-09	-20253	8796		SMc01184																												SMc04032	2	3035290	3036072	R	1234491	-	SMc04032	NP_386921.1	260
SM_b20426	D	SM_b20426_m3	D	-166	-138	GACATTGGGTGCTCACTTTTACATTGTCA	17.7	1.6e-09	-20253	8796		SMc01195																												SMc03256	2	3371035	3371382	R	1234795	-	SMc03256	NP_387215.1	115
SM_b20426	D	SM_b20426_m3	D	-141	-113	GTCAATTGAGCTGATTTTGATCACTGTTC	15.9	1.3e-08	-18158	7886		SMc01199																												SMc03253	2	3367412	3368254	R	1234792	-	SMc03253	NP_387213.1	280
SM_b21706	R	SM_b20426_m3	R	-271	-243	CACAATGAGAAAACCTTTTCTCAATGCGA	8.8	6.2e-06	-11991	5208		SMc01225																												SMc03251	2	3364892	3365899	R	1234790	-	SMc03251	NP_387211.1	335
SMa0822	R	SM_b20426_m4	R	-268	-255	GGACAATGTCATAT	9.6	7.6e-06	-11787	5119		SMc01226																												SMc02980	2	3101779	3102225	R	1234549	-	SMc02980	NP_386978.1	148
SM_b20425	R	SM_b20426_m4	R	-79	-66	TTACATTGTCAATT	15.7	1.8e-09	-20135	8745		SMc01228																												SMc02642	2	1179230	1179544	D	1232725	-	SMc02642	NP_385187.1	104
SM_b20426	D	SM_b20426_m4	D	-148	-135	TTACATTGTCAATT	15.7	1.8e-09	-20135	8745		SMc01229																												SMc02524	2	3267726	3268205	R	1234695	fdsG	SMc02524	NP_387117.1	159
SM_b21299	D	SM_b20426_m4	D	-42	-29	TAACATTGCCAAAA	9.5	8.1e-06	-11724	5092		SMc01260																												SMc02366	2	1113918	1114619	D	1232665	-	SMc02366	NP_385128.1	233
SM_b20425	R	SM_b20426_m5	R	-97	-81	AGCTGATTTTGATCACT	10.7	2.9e-06	-12751	5538		SMc01267																												SMc02030	2	2734709	2735614	R	1234210	-	SMc02030	NP_386648.1	301
SM_b20426	D	SM_b20426_m5	D	-133	-117	AGCTGATTTTGATCACT	10.7	2.9e-06	-12751	5538		SMc01403																												SMc01664	2	2466631	2467476	D	1233942	-	SMc01664	NP_386382.1	281
SMa0097	R	SM_b20441_m1	R	-124	-94	AGCGAATTGGCCAAGCCAACTGCAACCTTTC	0.7	6.8e-06	-11899	5167		SMc01406																												SMc01497	2	2632014	2632886	R	1234111	smoF	SMc01497	NP_386550.1	290
SMa0789	D	SM_b20441_m1	D	-134	-104	GAGCAACTGGTCATGGCAGTTGCCTTAAGCG	2.3	3.5e-06	-12563	5456		SMc01443																												SMc01199	2	1731092	1731304	R	1233248	-	SMc01199	NP_385700.1	70
SM_b20375	R	SM_b20441_m1	R	-41	-11	TCCCAACTGGTATTACCAGTAAGCACCACAT	6.7	4.5e-07	-14614	6347		SMc01450																												SMc01184	2	1747158	1748696	D	1233264	-	SMc01184	NP_385715.1	512
SM_b20441	D	SM_b20441_m1	D	-60	-30	GGGGAATTGGTATGACCACTTGGCCACTTGG	27.6	5.4e-14	-30550	13268		SMc01456																												SMc01092	2	466650	467540	D	1232063	-	SMc01092	NP_384535.1	296
SMa0097	R	SM_b20441_m2	R	-124	-94	AGCGAATTGGCCAAGCCAACTGCAACCTTTC	3.7	3.6e-06	-12535	5444		SMc01488																												SMc00949	2	1776351	1776680	D	1233300	-	SMc00949	NP_385747.1	109
SMa0789	D	SM_b20441_m2	D	-134	-104	GAGCAACTGGTCATGGCAGTTGCCTTAAGCG	2.4	6.5e-06	-11944	5187		SMc01495																												SMc00942	2	1769641	1769883	R	1233293	-	SMc00942	NP_385740.1	80
SM_b20375	R	SM_b20441_m2	R	-41	-11	TCCCAACTGGTATTACCAGTAAGCACCACAT	6.4	1.0e-06	-13816	6000		SMc01497																												SMc00938	2	1767233	1767823	D	1233288	-	SMc00938	NP_385736.1	196
SM_b20441	D	SM_b20441_m2	D	-60	-30	GGGGAATTGGTATGACCACTTGGCCACTTGG	27.2	7.1e-14	-30276	13149		SMc01551																												SMc00878	2	908239	908979	D	1232469	-	SMc00878	NP_384934.1	246
SMa0097	R	SM_b20441_m4	R	-124	-94	AGCGAATTGGCCAAGCCAACTGCAACCTTTC	0.6	7.0e-06	-11870	5155		SMc01563																												SMc00877	2	909133	909966	D	1232470	-	SMc00877	NP_384935.1	277
SMa0789	D	SM_b20441_m4	D	-134	-104	GAGCAACTGGTCATGGCAGTTGCCTTAAGCG	2.4	3.3e-06	-12622	5481		SMc01592																												SMc00672	2	2907840	2908874	D	1234375	hisX	SMc00672	NP_386806.1	344
SM_b20375	R	SM_b20441_m4	R	-41	-11	TCCCAACTGGTATTACCAGTAAGCACCACAT	6.8	4.5e-07	-14614	6347		SMc01610																												SMc00490	2	1918527	1919945	D	1233442	-	SMc00490	NP_385883.1	472
SM_b20441	D	SM_b20441_m4	D	-60	-30	GGGGAATTGGTATGACCACTTGGCCACTTGG	27.5	6.2e-14	-30412	13208		SMc01615																												SMc00479	2	1938413	1939429	R	1233458	-	SMc00479	NP_385899.1	338
SMa0097	R	SM_b20441_m5	R	-109	-98	AATTGGCCAAGC	10.1	7.7e-06	-11774	5114		SMc01630																												SMc00429	2	377524	378333	R	1231982	-	SMc00429	NP_384454.1	269
SM_b20441	D	SM_b20441_m5	D	-43	-32	ACTTGGCCACTT	12.2	6.1e-07	-14310	6215		SMc01651																												SMc00329	2	283769	284191	D	1231881	irr	SMc00329	NP_384355.1	140
SMa0179	R	SM_b20455_m1	R	-59	-39	TTTTTATCGTTTAATAATAAT	4.2	9.8e-06	-11533	5009		SMc01664																												SMc00146	2	2023390	2023881	D	1233527	-	SMc00146	NP_385968.1	163
SM_b20455	R	SM_b20455_m1	R	-94	-74	TGTGTATCGATCATTACAGAA	22.6	1.4e-11	-24992	10854		SMc01724																												SMc00107	2	1067701	1068414	R	1232617	-	SMc00107	NP_385080.1	237
SM_b20455	R	SM_b20455_m1	R	-37	-17	TCTGTAGCGATTGATAAATAT	15.4	1.4e-08	-18084	7854		SMc01728																												SM_b21640	2	1667831	1668829	R	1237891	paaA	SM_b21640	NP_438099.1	332
SMc00095	R	SM_b20455_m3	R	-58	-37	TGATCCATCAATCAATAAAAAA	3.9	4.9e-06	-12226	5310		SMc01762																												SM_b21493	2	1414906	1415367	R	1237654	-	SM_b21493	NP_437862.1	153
SMc01495	R	SM_b20455_m3	R	-151	-130	AATTTTACCGTTTGATAAAAAA	5.7	2.0e-06	-13122	5699		SMc01819																												SM_b21484	2	1405318	1405839	D	1237643	rpoE5	SM_b21484	NP_437851.1	173
SMa0179	R	SM_b20455_m3	R	-59	-38	ATTTTTATCGTTTAATAATAAT	4.4	3.9e-06	-12455	5409		SMc01908																												SM_b21385	2	1048341	1049276	D	1237294	-	SM_b21385	NP_437503.1	311
SMa1505	D	SM_b20455_m3	D	-151	-130	TTGGATACCAATCAATAAAAAT	3.3	6.1e-06	-12007	5215		SMc01945																												SM_b21372	2	1036546	1037604	R	1237281	-	SM_b21372	NP_437490.1	352
SM_b20455	R	SM_b20455_m3	R	-94	-73	TTGTGTATCGATCATTACAGAA	23.2	9.5e-12	-25380	11022		SMc01975																												SM_b20827	2	617618	618205	D	1236898	-	SM_b20827	NP_437107.1	195
SM_b20455	R	SM_b20455_m3	R	-37	-16	TTCTGTAGCGATTGATAAATAT	19.5	3.6e-10	-21745	9444		SMc01981																												SM_b20820	2	608691	609920	D	1236891	mocF	SM_b20820	NP_437100.1	409
SM_b20455	R	SM_b20455_m4	R	-93	-72	TTTGTGTATCGATCATTACAGA	20.3	5.9e-11	-23553	10229		SMc01982																												SM_b20522	2	548378	548746	D	1236834	-	SM_b20522	NP_437043.1	122
SM_b20455	R	SM_b20455_m4	R	-36	-15	TTTCTGTAGCGATTGATAAATA	16.3	8.8e-09	-18549	8056		SMc01989																												SM_b20509	2	531624	532391	D	1236822	-	SM_b20509	NP_437031.1	255
SM_b20154	R	SM_b20455_m5	R	-245	-229	GCATTTTTCTGTTGACA	10.2	3.5e-06	-12563	5456		SMc01995																												SM_b20508	2	530452	531435	R	1236821	-	SM_b20508	NP_437030.1	327
SM_b20455	R	SM_b20455_m5	R	-48	-32	AAATATATCGCTTGACA	15.0	3.7e-08	-17112	7432		SMc02030																												SM_b20465	2	477065	478135	R	1236778	-	SM_b20465	NP_436987.1	356
SMc02893	D	SM_b20457_m1	D	-52	-42	CTCGTGCATTT	10.3	3.5e-06	-12563	5456		SMc02087																												SM_b20392	2	405680	406387	R	1236709	-	SM_b20392	NP_436918.1	235
SMc01195	R	SM_b20457_m2	R	-102	-73	ACACAAGCGGATCACATAAGATAGATTATG	10.9	2.0e-06	-13122	5699		SMc02113																												SM_b20367	2	379530	380222	R	1236684	-	SM_b20367	NP_436893.1	230
SMa1141	D	SM_b20457_m2	D	-95	-66	TTACAATATCGTACCCATTTTTGCACTCGT	11.7	8.9e-07	-13932	6051		SMc02140																												SM_b20344	2	349255	350211	R	1236661	-	SM_b20344	NP_436870.1	318
SMa1918	D	SM_b20457_m2	D	-298	-269	AGATAAAAATGTGAAAATACTATTATTTCG	10.2	3.3e-06	-12622	5481		SMc02162																												SM_b20219	2	227578	228315	R	1236543	-	SM_b20219	NP_436752.1	245
SMa5007	R	SM_b20457_m4	R	-326	-309	GCGGATTTAGCGATAACG	12.1	8.8e-07	-13943	6056		SMc02172																												SM_b20055	2	63995	64984	D	1236346	-	SM_b20055	NP_436595.1	329
SM_b20457	R	SM_b20457_m4	R	-202	-185	CGGGATTGGGTGATAATG	12.8	4.8e-07	-14549	6319		SMc02175																												SM_b20049	2	60310	62271	D	1236343	fusA2	SM_b20049	NP_436592.1	653
SMc01495	R	SM_b20457_m5	R	-154	-142	TGATAAAAAAATA	10.6	4.0e-06	-12429	5398		SMc02223																												SMa2163	2	1218608	1219489	D	1236211	-	SMa2163	NP_436421.2	293
SMc00678	R	SM_b20457_m5	R	-26	-14	TTATAAACAAAGT	10.4	4.8e-06	-12247	5319		SMc02229																												SMa1966	2	1118218	1119327	R	1236114	-	SMa1966	NP_436324.1	369
SM_b20457	R	SM_b20457_m5	R	-207	-195	TGATAATGACAAT	11.0	2.5e-06	-12899	5602		SMc02261																												SMa1910	2	1087264	1087539	D	1236086	-	SMa1910	NP_436296.2	91
SM_b21574	D	SM_b20457_m5	D	-229	-217	TAATAAAGACAGT	11.0	2.5e-06	-12899	5602		SMc02323																												SMa1632	2	907961	908914	D	1235926	-	SMa1632	NP_436136.1	317
SM_b20347	R	SM_b20509_m1	R	-147	-135	ACTCATCATACCA	11.7	1.1e-06	-13720	5959		SMc02340																												SMa1456	2	802839	803228	R	1235831	-	SMa1456	NP_436041.1	129
SM_b20508	R	SM_b20509_m1	R	-67	-55	AAAGATCATACTT	10.9	1.6e-06	-13346	5796		SMc02350																												SMa1231	2	675132	675956	D	1235707	-	SMa1231	NP_435917.1	274
SM_b20509	D	SM_b20509_m1	D	-138	-126	AAAGATCATACTT	10.9	1.6e-06	-13346	5796		SMc02351																												SMa1169	2	641662	642003	D	1235671	-	SMa1169	NP_435881.1	113
SMc03140	R	SM_b20509_m2	R	-17	-5	CCTCTCTCCCAAT	11.5	1.5e-06	-13410	5824		SMc02366																												SMa1082	2	590350	590970	R	1235622	-	SMa1082	NP_435832.2	206
SM_b20508	R	SM_b20509_m2	R	-17	-5	TTTCTCTCCCTAT	14.0	1.1e-07	-16023	6959		SMc02374																												SMa0772	2	418345	418896	D	1235451	nodL	SMa0772	NP_435661.1	183
SM_b20509	D	SM_b20509_m2	D	-188	-176	TTTCTCTCCCTAT	14.0	1.1e-07	-16023	6959		SMc02391																												SMa0229	2	128085	128507	D	1235348	-	SMa0229	NP_435369.1	140
SM_b21102	R	SM_b20509_m2	R	-18	-6	CGTCTCTCCCAGA	9.8	4.8e-06	-12247	5319		SMc02406																												SMa0063	2	33453	34187	D	1235255	-	SMa0063	NP_435276.2	244
SM_b20896	D	SM_b20509_m2	D	-346	-334	GATCTCTCCCTGA	9.4	6.3e-06	-11975	5201		SMc02470																												SMc04408	1	3616640	3616900	R	1235008	-	SMc04408	NP_387420.1	86
SM_b20508	R	SM_b20509_m3	R	-140	-130	CGTCACCTCGG	10.5	6.5e-06	-11944	5187		SMc02523																												SMc04313	1	2132417	2132650	D	1233633	-	SMc04313	NP_386074.1	77
SM_b20509	D	SM_b20509_m3	D	-63	-53	CGTCACCTCGG	10.5	6.5e-06	-11944	5187		SMc02524																												SMc04264	1	2094373	2095263	D	1233599	-	SMc04264	NP_386040.1	296
SMa0179	R	SM_b20509_m4	R	-73	-41	TTTATCGTTTAATAATAATGGGCTACAGTGATG	-11.2	4.6e-06	-12289	5337		SMc02560																												SMc04143	1	128940	129662	D	1231740	-	SMc04143	NP_384215.1	240
SM_b20508	R	SM_b20509_m4	R	-88	-56	AAGATCATACTTGTCAATTGCTCTGGTATGATG	31.2	3.6e-15	-33258	14444		SMc02584																												SMc04109	1	164746	166032	D	1231774	cpaE1	SMc04109	NP_384249.1	428
SM_b20509	D	SM_b20509_m4	D	-137	-105	AAGATCATACTTGTCAATTGCTCTGGTATGATG	31.2	3.6e-15	-33258	14444		SMc02589																												SMc04055	1	3057996	3058952	R	1234515	-	SMc04055	NP_386944.1	318
SMa0179	R	SM_b20509_m5	R	-75	-41	TTTATCGTTTAATAATAATGGGCTACAGTGATGAA	-10.4	1.6e-06	-13346	5796		SMc02642																												SMc04051	1	3055204	3055740	R	1234511	rpoE4	SMc04051	NP_386940.1	178
SM_b20508	R	SM_b20509_m5	R	-90	-56	AAGATCATACTTGTCAATTGCTCTGGTATGATGAA	32.1	1.2e-15	-34356	14921		SMc02647																												SMc04011	1	3005682	3007223	R	1234471	tacA	SMc04011	NP_386901.1	513
SM_b20509	D	SM_b20509_m5	D	-137	-103	AAGATCATACTTGTCAATTGCTCTGGTATGATGAA	32.1	1.2e-15	-34356	14921		SMc02773																												SMc03998	1	2996119	2996379	D	1234458	-	SMc03998	NP_386888.1	86
SMa1948	D	SM_b20516_m3	D	-339	-329	AACGCCCTCGA	10.4	6.4e-06	-11959	5194		SMc02778																												SMc03780	1	3445325	3445816	D	1234856	-	SMc03780	NP_387269.1	163
SM_b20516	D	SM_b20516_m3	D	-14	-4	ATCGCTCTCGA	11.2	3.2e-06	-12652	5495		SMc02851																												SMc03744	1	2529546	2529833	R	1234009	-	SMc03744	NP_386448.1	95
SM_b20516	D	SM_b20516_m4	D	-56	-40	CTTGAGGGCGTCAGAGT	20.6	3.8e-11	-23993	10420		SMc02888																												SMc03170	1	3131057	3131896	D	1234578	-	SMc03170	NP_387007.1	279
SM_b20525	D	SM_b20525_m1	D	-53	-32	TCCTAGGACGATCGTCCTAGGA	23.3	2.2e-12	-26843	11658		SMc02893																												SMc03092	1	3256471	3256905	R	1234685	-	SMc03092	NP_387107.1	144
SM_b20525	D	SM_b20525_m2	D	-53	-32	TCCTAGGACGATCGTCCTAGGA	23.6	3.4e-12	-26407	11469		SMc02980																												SMc02888	1	243152	244174	R	1231845	-	SMc02888	NP_384319.1	340
SM_b20055	D	SM_b20525_m4	D	-77	-65	ATTAGGCCGATTG	11.3	1.7e-06	-13285	5770		SMc03015																												SMc02778	1	14893	15693	D	1231641	-	SMc02778	NP_384122.1	266
SM_b20525	D	SM_b20525_m4	D	-52	-40	CCTAGGACGATCG	14.1	1.3e-07	-15856	6886		SMc03046																												SMc02406	1	1158131	1162366	R	1232705	-	SMc02406	NP_385167.1	1411
SMa0407	D	SM_b20525_m5	D	-22	-10	AACATACCAGATA	9.8	8.2e-06	-11711	5086		SMc03060																												SMc02374	1	1127475	1127651	R	1232673	-	SMc02374	NP_385136.1	58
SMa1118	D	SM_b20525_m5	D	-14	-2	AGCATACCAGCCA	9.7	9.0e-06	-11618	5046		SMc03092																												SMc02351	1	2772950	2773417	R	1234246	-	SMc02351	NP_386684.1	155
SM_b20525	D	SM_b20525_m5	D	-355	-343	GTCATACCAGACG	10.0	6.7e-06	-11913	5174		SMc03101																												SMc02261	1	625996	626610	D	1232202	-	SMc02261	NP_384671.1	204
SMc01615	R	SM_b20531_m1	R	-55	-43	AAAGGTAACATTC	10.1	4.9e-06	-12226	5310		SMc03122																												SMc02175	1	520434	521138	R	1232107	-	SMc02175	NP_384578.1	234
SM_b21574	D	SM_b20531_m1	D	-170	-158	GAACGTTACATCG	10.8	2.9e-06	-12751	5538		SMc03123																												SMc02140	1	572383	573066	D	1232151	phoB	SMc02140	NP_384621.1	227
SMc03015	D	SM_b20531_m2	D	-214	-197	GCTCACGCATACGTGAAT	12.1	6.8e-07	-14201	6167		SMc03140																												SMc01981	1	2705882	2706268	D	1234183	-	SMc01981	NP_386621.1	128
SMc01226	R	SM_b20531_m2	R	-77	-60	AGTCACAACGTCGTGAAT	9.8	3.1e-06	-12684	5509		SMc03169																												SMc01762	1	1309800	1310135	D	1232844	-	SMc01762	NP_385306.1	111
SMc00820	R	SM_b20531_m3	R	-201	-171	CAGGGGACGGGTTTCTTCGTGCCCGCGAAAA	3.7	8.6e-06	-11664	5066		SMc03170																												SMc01724	1	478241	478735	D	1232075	-	SMc01724	NP_384547.1	164
SM_b20531	D	SM_b20531_m4	D	-46	-16	CATGTAACAAGTAGCGAAACTCGGCGAATTG	23.7	2.3e-12	-26798	11638		SMc03210																												SMc01228	1	1696164	1696958	R	1233217	-	SMc01228	NP_385669.1	264
SMc01267	D	SM_b20531_m5	D	-368	-357	CGATCACGAAAT	10.5	4.4e-06	-12334	5357		SMc03251																												SMc01106	1	448833	449264	R	1232048	-	SMc01106	NP_384520.1	143
SMa1456	R	SM_b20537_m1	R	-70	-39	ATATATGTCAGTCCATGCAATTTCGCAAGACC	5.6	2.9e-06	-12751	5538		SMc03252																												SMc01004	1	1531283	1531735	R	1233072	hisI	SMc01004	NP_385525.1	150
SM_b20049	D	SM_b20537_m1	D	-112	-81	AACTCCTGCTAACGCGCAATTTTTGCAAGAAA	3.5	8.4e-06	-11687	5076		SMc03253																												SMc00994	1	944917	945732	D	1232503	-	SMc00994	NP_384968.2	271
SM_b20537	R	SM_b20537_m1	R	-41	-10	ACATTGCGCAATCAATGCAAATTTGCAAGAGC	22.8	1.3e-11	-25066	10886		SMc03256																												SMc00929	1	898303	899283	R	1232460	-	SMc00929	NP_384925.1	326
SMc01989	D	SM_b20537_m2	D	-177	-151	TCGCAAGACTGGAAAAGGTGCAACAGT	9.9	1.3e-06	-13553	5886		SMc03258																												SMc00886	1	899365	900909	D	1232461	-	SMc00886	NP_384926.1	514
SMa1505	D	SM_b20537_m2	D	-146	-120	TACCAATCAATAAAAATTTGCATGGCA	7.5	5.7e-06	-12075	5244		SMc03287																												SMc00458	1	1104977	1105648	D	1232657	feuP	SMc00458	NP_385120.1	223
SM_b20537	R	SM_b20537_m2	R	-50	-24	ATGCAAATTTGCAAGAGCGAAAAGAGA	9.4	1.8e-06	-13228	5745		SMc03744																												SMc00278	1	1848133	1848615	D	1233366	-	SMc00278	NP_385812.1	160
SM_b20537	R	SM_b20537_m2	R	-41	-15	GCGCAATCAATGCAAATTTGCAAGAGC	15.3	2.4e-08	-17545	7620		SMc03780																												SMc00277	1	1846535	1848034	R	1233365	-	SMc00277	NP_385811.1	499
SM_b21117	R	SM_b20537_m2	R	-127	-101	ACGCAACTTTCCAATAATTGCGAGTTC	8.8	2.7e-06	-12822	5569		SMc03794																												SMc00275	1	1844280	1845254	D	1233363	-	SMc00275	NP_385809.1	324
SM_b21533	D	SM_b20537_m2	D	-116	-90	TCACAAAACATCACAAATCGCAAATTA	6.7	8.9e-06	-11629	5051		SMc03820																												SMc00251	1	1820813	1821076	D	1233338	-	SMc00251	NP_385784.1	87
SM_b20049	D	SM_b20537_m3	D	-99	-84	GCGCAATTTTTGCAAG	12.2	6.2e-07	-14294	6208		SMc03843																												SMc00118	1	1092006	1092428	R	1232643	-	SMc00118	NP_385106.1	140
SM_b20537	R	SM_b20537_m3	R	-30	-15	GCGCAATCAATGCAAA	11.6	1.4e-06	-13479	5854		SMc03890																												SMc00116	1	1083682	1084179	R	1232633	-	SMc00116	NP_385096.1	165
SM_b20537	R	SM_b20537_m3	R	-19	-4	GCGCAAACATTGCGCA	10.0	7.5e-06	-11801	5125		SMc03998																												SM_b21569	1	1107381	1107980	R	1237340	-	SM_b21569	NP_437549.1	199
SM_b21533	D	SM_b20537_m3	D	-99	-84	TCGCAAATTATGCACC	10.1	7.5e-06	-11801	5125		SMc04011																												SM_b21521	1	1445257	1445715	R	1237683	-	SM_b21521	NP_437891.1	152
SM_b21533	D	SM_b20537_m3	D	-27	-12	CCACAAATATTGCAAC	9.8	9.0e-06	-11618	5046		SMc04032																												SM_b21359	1	1024474	1024932	D	1237266	-	SM_b21359	NP_437475.1	152
SMc02087	R	SM_b20537_m4	R	-76	-54	AGCGTTGCGAATTTGCTATATGA	6.4	4.0e-06	-12429	5398		SMc04051																												SM_b21210	1	963136	963807	R	1237207	-	SM_b21210	NP_437416.1	223
SMc03287	R	SM_b20537_m4	R	-176	-154	AACAGTGCAAATCTTCTTGGTTT	6.3	4.4e-06	-12334	5357		SMc04054																												SM_b21208	1	960969	961691	R	1237205	-	SM_b21208	NP_437414.2	240
SMa1505	D	SM_b20537_m4	D	-141	-119	ATCAATAAAAATTTGCATGGCAA	9.0	1.0e-06	-13816	6000		SMc04055																												SM_b21158	1	901638	902501	D	1237155	-	SM_b21158	NP_437364.1	287
SM_b20537	R	SM_b20537_m4	R	-42	-20	ATCAATGCAAATTTGCAAGAGCG	15.6	1.5e-08	-18015	7824		SMc04109																												SM_b20914	1	1321684	1322694	R	1237545	-	SM_b20914	NP_437753.1	336
SMc01182	R	SM_b20537_m5	R	-178	-149	ACTTTTCCTGAAAGTGCTCTAATGTTGCCG	8.5	6.9e-06	-11884	5161		SMc04134																												SM_b20722	1	1527168	1527845	R	1237761	-	SM_b20722	NP_437969.1	225
SMc02350	R	SM_b20537_m5	R	-75	-46	TGAATAGATTTAGTAGATAATAATTTTCGT	9.9	2.6e-06	-12860	5585		SMc04143																												SM_b20592	1	1606089	1606772	D	1237836	rpo	SM_b20592	NP_438044.1	227
SMa0831	D	SM_b20537_m5	D	-202	-173	CTATTTTTCTGGTTTGTTAGAGGTTTGCCC	10.8	1.4e-06	-13479	5854		SMc04161																												SM_b20582	1	1596355	1597275	R	1237826	-	SM_b20582	NP_438034.1	306
SM_b20049	D	SM_b20537_m5	D	-114	-85	TCAACTCCTGCTAACGCGCAATTTTTGCAA	8.1	9.0e-06	-11618	5046		SMc04162																												SM_b20516	1	541280	541606	D	1236828	-	SM_b20516	NP_437037.1	108
SMc00794	R	SM_b20582_m1	R	-306	-281	GGCGCCGTGCCAGCGGGGGTCGCCCC	11.0	1.7e-07	-15587	6770		SMc04163																												SM_b20331	1	334596	334952	R	1236648	-	SM_b20331	NP_436857.1	118
SMc01184	D	SM_b20582_m1	D	-71	-46	GGCGCGTCCCCAACGAAACGCGCCTA	9.6	3.8e-06	-12481	5420		SMc04194																												SM_b20255	1	260759	261310	R	1236576	-	SM_b20255	NP_436785.1	183
SMa1505	D	SM_b20582_m3	D	-217	-207	GCACCCTCCCT	11.1	9.9e-07	-13826	6004		SMc04203																												SM_b20231	1	236096	237451	D	1236553	-	SM_b20231	NP_436762.1	451
SMa2049	D	SM_b20582_m3	D	-248	-238	CTACCCTCCAC	9.9	8.5e-06	-11675	5071		SMc04239																												SMa1893	1	1075895	1076770	D	1236077	-	SMa1893	NP_436287.1	291
SMa2263	D	SM_b20582_m3	D	-155	-145	ACCCCCTCCCT	10.3	3.8e-06	-12481	5420		SMc04264																												SMa1688	1	951569	951985	D	1235963	-	SMa1688	NP_436173.1	138
SM_b21574	D	SM_b20582_m3	D	-310	-300	CCACCCTCCCT	11.0	9.9e-07	-13826	6004		SMc04313																												SMa1454	1	801299	802342	D	1235829	-	SMa1454	NP_436039.2	347
SM_b20582	R	SM_b20582_m3	R	-14	-4	GCACCCTCCCT	11.1	9.9e-07	-13826	6004		SMc04315																												SMa1207	1	661869	662549	R	1235693	-	SMa1207	NP_435903.2	226
SMc00241	R	SM_b20582_m4	R	-142	-132	CCCCGCGCGCG	8.3	8.1e-06	-11724	5092		SMc04319																												SMa1118	1	608683	609210	D	1235641	hspC2	SMa1118	NP_435851.1	175
SMc01975	D	SM_b20582_m4	D	-126	-116	CCCCGCGCGCG	8.3	8.1e-06	-11724	5092		SMc04320																												SMa1100	1	600897	601418	D	1235634	-	SMa1100	NP_435844.2	173
SM_b20665	R	SM_b20582_m4	R	-242	-232	CCCCGCGCGCG	8.3	8.1e-06	-11724	5092		SMc04337																												SMa0849	1	466418	467398	D	1235498	syrM	SMa0849	NP_435708.1	326
SM_b21706	R	SM_b20582_m4	R	-384	-374	CCCCGCGCGCG	8.3	8.1e-06	-11724	5092		SMc04348																												SMa0810	1	443587	443793	R	1235476	fixU	SMa0810	NP_435686.1	68
SM_b20901	R	SM_b20582_m5	R	-52	-24	GCGCCAGACGAGGCGCTCAAAGGGCGCTG	10.0	6.8e-06	-11899	5167		SMc04363																												SMa0462	1	246386	248227	R	1235061	-	SMa0462	NP_435487.1	613
SM_b21647	R	SM_b20582_m5	R	-238	-210	GCGCCCGCCTAAGTCCCCTCTCCCCGCCT	9.9	7.6e-06	-11787	5119		SMc04408																												SMa0246	1	136409	137119	D	1235355	-	SMa0246	NP_435376.2	236
SM_b21093	R	SM_b20586_m1	R	-183	-172	TAACGAACAAAT	11.0	3.1e-06	-12684	5509		SMc04882
SM_b21493	R	SM_b20586_m1	R	-13	-2	TATCGCACAATC	9.9	7.5e-06	-11801	5125
SMc01168	D	SM_b20586_m2	D	-52	-28	GATTTCGGTGATTATTGCACAAAAT	6.2	2.3e-06	-12983	5638
SM_b20586	R	SM_b20586_m2	R	-55	-31	TTTCTGTGCGTTATACGAACAAATA	17.2	2.5e-09	-19807	8602
SMc00041	D	SM_b20586_m3	D	-241	-227	CGCATGTCGCACAAA	6.4	4.6e-06	-12289	5337
SM_b21093	R	SM_b20586_m3	R	-182	-168	GAAATAACGAACAAA	5.4	7.1e-06	-11855	5149
SM_b20586	R	SM_b20586_m3	R	-71	-57	CAAATACCGCACGAA	8.2	1.8e-06	-13228	5745
SMc00041	D	SM_b20586_m4	D	-237	-227	TGTCGCACAAA	10.7	3.5e-06	-12563	5456
SM_b21093	R	SM_b20586_m4	R	-182	-172	TAACGAACAAA	11.1	2.1e-06	-13074	5678
SM_b21493	R	SM_b20586_m4	R	-12	-2	TATCGCACAAT	10.8	2.9e-06	-12751	5538
SMc01168	D	SM_b20586_m5	D	-52	-28	GATTTCGGTGATTATTGCACAAAAT	5.3	1.3e-06	-13553	5886
SM_b20586	R	SM_b20586_m5	R	-55	-31	TTTCTGTGCGTTATACGAACAAATA	17.3	1.8e-09	-20135	8745
SMc01728	D	SM_b20592	D	-56	-42	AATAGATGCCCGAAA	9.8	9.1e-06	-11607	5041
SMa0625	D	SM_b20592	D	-395	-381	AAGAGGTTCCCGACC	12.3	4.0e-07	-14732	6398
SM_b20592	D	SM_b20592	D	-17	-3	AGAAGGAGCCCGACC	13.0	1.2e-07	-15936	6921
SM_b20592	D	SM_b20592	D	-22	-3	ATCCGAGAAGGAGCCCGACC	12.5	8.3e-08	-16304	7081
SM_b20047	D	SM_b20592	D	-129	-119	CAAATCTCCCC	11.2	2.3e-06	-12983	5638
SM_b20592	D	SM_b20592	D	-27	-17	CCAATATCCGA	10.9	3.4e-06	-12592	5469
SMc00864	R	SM_b20592	R	-194	-177	AAGAATGGGGCGTACCTT	11.3	1.8e-06	-13228	5745
SMc01728	D	SM_b20592	D	-56	-42	AATAGATGCCCGAAA	9.7	9.0e-06	-11618	5046
SMa0625	D	SM_b20592	D	-395	-381	AAGAGGTTCCCGACC	12.0	6.5e-07	-14246	6187
SM_b20592	D	SM_b20592	D	-17	-3	AGAAGGAGCCCGACC	13.2	9.5e-08	-16169	7022
SMc04134	D	SM_b20608_m1	D	-145	-126	AAATAACTATTTGGTTACAA	11.6	5.9e-07	-14343	6229
SMc00529	R	SM_b20608_m1	R	-163	-144	GAAAAGCTGACTGGTTTAGT	9.4	2.7e-06	-12822	5569
SM_b20608	R	SM_b20608_m1	R	-42	-23	AATTAACTTGATGGTTTATT	17.3	3.5e-09	-19471	8456
SM_b20608	R	SM_b20608_m1	R	-26	-7	GCTTAACCTATCGGTTAATT	17.7	2.5e-09	-19807	8602
SM_b20608	R	SM_b20608_m2	R	-32	-16	ATCGGTTAATTAACTTG	17.5	2.5e-09	-19807	8602
SMc04134	D	SM_b20608_m3	D	-145	-126	AAATAACTATTTGGTTACAA	10.2	1.5e-06	-13410	5824
SMc00529	R	SM_b20608_m3	R	-163	-144	GAAAAGCTGACTGGTTTAGT	9.2	3.0e-06	-12717	5523
SMa0825	D	SM_b20608_m3	D	-168	-149	GCTCAACCATCTGGTCAATT	7.5	8.7e-06	-11652	5060
SM_b20608	R	SM_b20608_m3	R	-42	-23	AATTAACTTGATGGTTTATT	17.2	3.9e-09	-19362	8409
SM_b20608	R	SM_b20608_m3	R	-26	-7	GCTTAACCTATCGGTTAATT	17.6	2.5e-09	-19807	8602
SMc03140	R	SM_b20608_m4	R	-143	-133	CCCTTGACATT	10.2	1.5e-06	-13410	5824
SMc04163	R	SM_b20608_m5	R	-44	-19	AGAAAAACTGAAAGATAGCTTAACTT	7.8	2.0e-06	-13122	5699
SMa2008	R	SM_b20608_m5	R	-32	-7	TTATAAAACGTAACGTAACGTAACTA	7.5	2.4e-06	-12940	5620
SMa2009	D	SM_b20608_m5	D	-52	-27	TTATAAAACGTAACGTAACGTAACTA	7.5	2.4e-06	-12940	5620
SM_b20203	D	SM_b20608_m5	D	-48	-23	AATTTATTCATTTGACTTCATAAGTT	5.5	7.2e-06	-11841	5143
SM_b20608	R	SM_b20608_m5	R	-31	-6	TGCTTAACCTATCGGTTAATTAACTT	24.7	9.1e-13	-27725	12041
SMc00953	R	SM_b20674_m1	R	-121	-100	AGTATGCAACCGTTTGGGAAGG	9.1	6.5e-06	-11944	5187
SMc03890	R	SM_b20674_m1	R	-181	-160	TTTATCGAAACCGTTCGGAATT	8.5	9.3e-06	-11585	5032
SM_b20673	R	SM_b20674_m1	R	-170	-149	ATCATCAAAACGTTTCGGGCGA	13.2	2.7e-07	-15125	6569
SM_b20673	R	SM_b20674_m1	R	-83	-62	CTATTCTAAACGTTTCGACACT	17.0	2.1e-09	-19981	8678
SM_b20674	D	SM_b20674_m1	D	-154	-133	CTATTCTAAACGTTTCGACACT	17.0	2.1e-09	-19981	8678
SM_b20674	D	SM_b20674_m1	D	-67	-46	ATCATCAAAACGTTTCGGGCGA	13.2	2.7e-07	-15125	6569
SM_b20896	D	SM_b20674_m2	D	-173	-163	AACTGTCAAAT	9.9	6.4e-06	-11959	5194
SMc04134	D	SM_b20674_m3	D	-190	-181	CTCCTCCCTT	10.6	6.7e-06	-11913	5174
SM_b20817	R	SM_b20674_m3	R	-14	-5	CTCCTCCCTG	12.0	1.1e-06	-13720	5959
SM_b20818	D	SM_b20674_m3	D	-205	-196	CTCCTCCCTG	12.0	1.1e-06	-13720	5959
SM_b20673	R	SM_b20674_m3	R	-21	-12	AGCCTCCCTA	10.7	3.7e-06	-12507	5432
SM_b20674	D	SM_b20674_m3	D	-204	-195	AGCCTCCCTA	10.7	3.7e-06	-12507	5432
SMc00529	R	SM_b20674_m4	R	-98	-84	GAGACGAAGCTCATG	10.9	3.8e-06	-12481	5420
SM_b20673	R	SM_b20674_m4	R	-194	-180	ACGACGAAATTCAAG	12.2	1.0e-06	-13816	6000
SM_b20674	D	SM_b20674_m4	D	-36	-22	ACGACGAAATTCAAG	12.2	1.0e-06	-13816	6000
SM_b21093	R	SM_b20683_m1	R	-129	-109	GTCATAGCTTGTTGAAATAAC	7.9	6.6e-06	-11928	5180
SM_b21464	D	SM_b20683_m1	D	-191	-171	GGTATCGCTACTGGATATAAC	13.5	1.3e-07	-15856	6886
SMc00828	R	SM_b20683_m2	R	-149	-130	GGGACCCATATATTAGCCAA	5.2	1.8e-06	-13228	5745
SM_b20683	R	SM_b20683_m2	R	-60	-41	TTGAACAATATATTGGACGT	13.8	2.4e-08	-17545	7620
SM_b20683	R	SM_b20683_m3	R	-38	-12	CTATCGATACATTGTTACTCTGGATCG	26.3	2.5e-15	-33622	14602
SMc00241	R	SM_b20683_m4	R	-70	-59	ACACTAGATCGA	10.8	2.1e-06	-13074	5678
SMc04163	R	SM_b20683_m4	R	-226	-215	AGACTCGATCCA	10.9	1.9e-06	-13174	5721
SM_b20683	R	SM_b20683_m4	R	-39	-28	ACTCTGGATCGA	10.2	4.4e-06	-12334	5357
SMc01168	D	SM_b20683_m5	D	-148	-138	TCTCCTATCCA	9.6	6.7e-06	-11913	5174
SM_b20683	R	SM_b20683_m5	R	-18	-8	AGCCCTATCGA	9.7	5.4e-06	-12129	5268
SMc00109	R	SM_b20717_m1	R	-43	-22	AGTCTCTAGAGCTTTATATGGG	-2.1	7.3e-06	-11828	5137
SM_b21336	D	SM_b20717_m1	D	-157	-136	CTGATGTAAACGGTCGCATCAT	1.1	2.2e-06	-13027	5658
SM_b21598	D	SM_b20717_m1	D	-198	-177	CCACCGTAAACGTTTACGGAAC	-2.5	8.4e-06	-11687	5076
SM_b20717	R	SM_b20717_m1	R	-232	-211	AGAGTGTAAAGGTTTACATGAC	20.3	1.9e-10	-22384	9721
SM_b20717	R	SM_b20717_m1	R	-211	-190	TTTATGTAAACCTTTACATCGA	23.8	6.9e-12	-25699	11161
SMc00109	R	SM_b20717_m2	R	-42	-22	AGTCTCTAGAGCTTTATATGG	-2.4	8.4e-06	-11687	5076
SM_b21336	D	SM_b20717_m2	D	-157	-137	CTGATGTAAACGGTCGCATCA	0.9	2.4e-06	-12940	5620
SM_b21598	D	SM_b20717_m2	D	-198	-178	CCACCGTAAACGTTTACGGAA	-2.2	7.9e-06	-11749	5102
SM_b20717	R	SM_b20717_m2	R	-231	-211	AGAGTGTAAAGGTTTACATGA	20.5	1.8e-10	-22438	9745
SM_b20717	R	SM_b20717_m2	R	-210	-190	TTTATGTAAACCTTTACATCG	23.7	7.8e-12	-25577	11108
SMc00109	R	SM_b20717_m3	R	-43	-22	AGTCTCTAGAGCTTTATATGGG	-2.1	7.6e-06	-11787	5119
SM_b21336	D	SM_b20717_m3	D	-157	-136	CTGATGTAAACGGTCGCATCAT	1.1	2.2e-06	-13027	5658
SM_b21598	D	SM_b20717_m3	D	-198	-177	CCACCGTAAACGTTTACGGAAC	-2.4	8.1e-06	-11724	5092
SM_b20717	R	SM_b20717_m3	R	-232	-211	AGAGTGTAAAGGTTTACATGAC	20.3	1.9e-10	-22384	9721
SM_b20717	R	SM_b20717_m3	R	-211	-190	TTTATGTAAACCTTTACATCGA	23.8	7.0e-12	-25685	11155
SMc00109	R	SM_b20717_m4	R	-43	-22	AGTCTCTAGAGCTTTATATGGG	-2.2	7.7e-06	-11774	5114
SM_b21336	D	SM_b20717_m4	D	-157	-136	CTGATGTAAACGGTCGCATCAT	1.1	2.2e-06	-13027	5658
SM_b21598	D	SM_b20717_m4	D	-198	-177	CCACCGTAAACGTTTACGGAAC	-2.4	8.5e-06	-11675	5071
SM_b20717	R	SM_b20717_m4	R	-232	-211	AGAGTGTAAAGGTTTACATGAC	20.3	1.9e-10	-22384	9721
SM_b20717	R	SM_b20717_m4	R	-211	-190	TTTATGTAAACCTTTACATCGA	23.8	6.9e-12	-25699	11161
SMc00109	R	SM_b20717_m5	R	-43	-22	AGTCTCTAGAGCTTTATATGGG	-2.2	7.7e-06	-11774	5114
SM_b21336	D	SM_b20717_m5	D	-157	-136	CTGATGTAAACGGTCGCATCAT	1.1	2.2e-06	-13027	5658
SM_b21598	D	SM_b20717_m5	D	-198	-177	CCACCGTAAACGTTTACGGAAC	-2.4	8.5e-06	-11675	5071
SM_b20717	R	SM_b20717_m5	R	-232	-211	AGAGTGTAAAGGTTTACATGAC	20.3	1.9e-10	-22384	9721
SM_b20717	R	SM_b20717_m5	R	-211	-190	TTTATGTAAACCTTTACATCGA	23.8	6.9e-12	-25699	11161
SMc02340	D	SM_b20722_m1	D	-101	-90	CCCGTGCACCAG	10.0	7.3e-06	-11828	5137
SM_b20827	D	SM_b20722_m1	D	-95	-84	GCCTTTCACAAG	9.8	8.7e-06	-11652	5060
SM_b20615	D	SM_b20722_m1	D	-212	-201	GCCATTCACCAG	11.1	2.6e-06	-12860	5585
SMc01456	D	SM_b20722_m2	D	-117	-88	TACCGCCGGTGATACCGGCTTGTCACAAGT	7.2	7.7e-06	-11774	5114
SM_b20615	D	SM_b20722_m3	D	-212	-197	GCCATTCACCAGGGGG	8.7	9.0e-06	-11618	5046
SMc01975	D	SM_b20722_m4	D	-206	-197	CTCTCCCCGC	10.6	3.5e-06	-12563	5456
SMc01975	D	SM_b20722_m4	D	-130	-121	CTCTCCCCGC	10.6	3.5e-06	-12563	5456
SMc02523	R	SM_b20722_m4	R	-63	-54	CTCTCCCCGC	10.6	3.5e-06	-12563	5456
SMa0829	D	SM_b20722_m4	D	-83	-74	CTCTCCCCCG	10.9	1.9e-06	-13174	5721
SM_b20665	R	SM_b20722_m4	R	-237	-228	CTCTCCCCGC	10.6	3.5e-06	-12563	5456
SM_b20722	R	SM_b20722_m4	R	-18	-9	CTCTCCCCGG	11.3	1.2e-06	-13633	5921
SM_b21706	R	SM_b20722_m4	R	-379	-370	CTCTCCCCGC	10.6	3.5e-06	-12563	5456
SM_b21647	R	SM_b20722_m4	R	-236	-227	CTCTCCCCGC	10.6	3.5e-06	-12563	5456
SM_b20722	R	SM_b20722_m5	R	-70	-47	GTGAACGGCAGCGCTCTCAGGCAT	21.5	1.2e-14	-32054	13921
SMc00163	D	SM_b20817_m1	D	-34	-21	AGAATCCATCAAAA	10.5	4.5e-06	-12311	5347
SMa1132	D	SM_b20817_m1	D	-46	-33	CGAATCTCTCAAGA	10.3	5.4e-06	-12129	5268
SM_b20817	R	SM_b20817_m1	R	-74	-61	AGAATATATCATGA	11.9	1.0e-06	-13816	6000
SM_b20818	D	SM_b20817_m1	D	-149	-136	AGAATATATCATGA	11.9	1.0e-06	-13816	6000
SM_b20817	R	SM_b20817_m2	R	-74	-54	AATTGAGAGAATATATCATGA	16.3	1.1e-08	-18325	7959
SM_b20818	D	SM_b20817_m2	D	-156	-136	AATTGAGAGAATATATCATGA	16.3	1.1e-08	-18325	7959
SM_b20817	R	SM_b20817_m3	R	-73	-59	AGAGAATATATCATG	16.5	1.2e-08	-18238	7921
SM_b20818	D	SM_b20817_m3	D	-151	-137	AGAGAATATATCATG	16.5	1.2e-08	-18238	7921
SMc04134	D	SM_b20817_m4	D	-192	-181	TCCTCCTCCCTT	10.8	3.6e-06	-12535	5444
SMa0690	R	SM_b20817_m4	R	-17	-6	TCCGCCTCCCAG	10.0	9.1e-06	-11607	5041
SM_b20817	R	SM_b20817_m4	R	-14	-3	GTCTCCTCCCTG	10.3	6.1e-06	-12007	5215
SM_b20818	D	SM_b20817_m4	D	-207	-196	GTCTCCTCCCTG	10.3	6.1e-06	-12007	5215
SM_b21291	R	SM_b20817_m4	R	-108	-97	CCCGCCTCCCCA	11.0	2.6e-06	-12860	5585
SM_b20859	D	SM_b20859_m1	D	-162	-152	CAACGCGCGAA	10.2	6.1e-06	-12007	5215
SM_b20859	D	SM_b20859_m1	D	-18	-8	CAACGAGCGCG	10.1	8.1e-06	-11724	5092
SMc01651	D	SM_b20859_m2	D	-97	-71	ACAGCGTCGCGCTGGCGTGCACGACGA	10.0	5.9e-06	-12041	5229
SM_b20859	D	SM_b20859_m2	D	-146	-120	AAAGCACCGCGACATTGCTCGCGACAT	17.6	1.8e-10	-22438	9745
SMc02584	R	SM_b20859_m3	R	-46	-29	TCTCACCGGACGCGCAAA	10.3	4.0e-06	-12429	5398
SMa1797	D	SM_b20859_m3	D	-239	-222	TGTCACCTCGGGCGAAGT	9.5	7.7e-06	-11774	5114
SM_b20859	D	SM_b20859_m3	D	-167	-150	CGTCACAACGCGCGAAAA	16.6	1.2e-09	-20541	8921
SM_b20859	D	SM_b20859_m3	D	-21	-4	AGTCAACGAGCGCGCAAT	16.0	4.2e-09	-19288	8377
SM_b20817	R	SM_b20859_m4	R	-107	-97	TCAACCTATCC	11.7	1.4e-06	-13479	5854
SM_b20818	D	SM_b20859_m4	D	-113	-103	TCAACCTATCC	11.7	1.4e-06	-13479	5854
SM_b20859	D	SM_b20859_m4	D	-383	-373	TAATCCTATCC	11.5	1.9e-06	-13174	5721
SM_b20859	D	SM_b20859_m4	D	-223	-213	GCAACCTATCC	12.2	9.1e-07	-13910	6041
SM_b20859	D	SM_b20859_m5	D	-118	-90	GGGGATCTCATGGGTAGCAGGACTGACAG	26.4	8.4e-16	-34713	15076
SMc00270	R	SM_b20869_m1	R	-70	-59	GGCAGGGGCCGC	10.4	3.1e-06	-12684	5509
SMa0690	R	SM_b20869_m1	R	-24	-13	CCCAGGGGCCGG	11.1	1.3e-06	-13553	5886
SMc01819	R	SM_b20869_m2	R	-247	-231	ACATGAGGGCTATCCCG	9.5	9.6e-06	-11554	5018
SMc00658	R	SM_b20869_m2	R	-237	-221	GCATGGCCCGCGTCCCG	9.8	6.9e-06	-11884	5161
SMc03252	R	SM_b20869_m2	R	-235	-219	CCATGCCACGCCTCCCG	12.3	1.9e-07	-15476	6721
SMa1211	R	SM_b20869_m2	R	-109	-93	ACATGCCCCACATGCGG	10.0	5.4e-06	-12129	5268
SM_b20896	D	SM_b20896_m1	D	-146	-134	TGCATATCAAAAT	9.8	7.6e-06	-11787	5119
SM_b20896	D	SM_b20896_m1	D	-132	-120	GATATACCACTCT	12.8	3.8e-07	-14783	6420
SMc00654	D	SM_b20896_m2	D	-146	-123	AATATTTAACATTTTCGATACACC	6.5	2.1e-06	-13074	5678
SMa2215	D	SM_b20896_m2	D	-218	-195	TTTCTATATCTATTGCGATTTAAA	3.3	9.5e-06	-11564	5022
SM_b20896	D	SM_b20896_m2	D	-148	-125	CATGCATATCAAAATTGATATACC	21.5	5.8e-11	-23571	10237
SMc00256	R	SM_b20896_m4	R	-37	-7	TCAAATTTTATGCGTGATATGTCAAATCTCA	6.3	3.4e-06	-12592	5469
SMa1797	D	SM_b20896_m4	D	-124	-94	TGACATCCTATGTTGGAAGTTTCAGATACCG	5.0	6.6e-06	-11928	5180
SM_b20843	R	SM_b20896_m4	R	-43	-13	AGAAATAGGAAGAGTGGATCGATAAAGATCA	5.5	5.2e-06	-12167	5284
SM_b20896	D	SM_b20896_m4	D	-189	-159	TGGAATCAATTGCCATAACTGTCAAATACAA	13.8	4.1e-08	-17010	7387
SM_b20896	D	SM_b20896_m4	D	-184	-154	TCAATTGCCATAACTGTCAAATACAATATCG	6.5	3.1e-06	-12684	5509
SM_b20896	D	SM_b20896_m4	D	-168	-138	TCAAATACAATATCGCTTTGCATGCATATCA	21.9	3.4e-11	-24105	10469
SM_b20896	D	SM_b20896_m5	D	-145	-125	GCATATCAAAATTGATATACC	20.1	1.4e-10	-22689	9854
SMc02340	D	SM_b20901_m1	D	-336	-325	TATCCTCCCTCT	10.2	5.8e-06	-12058	5237
SMc02350	R	SM_b20901_m1	R	-16	-5	TGTCCTCCTGAC	10.4	3.7e-06	-12507	5432
SM_b21345	R	SM_b20901_m1	R	-21	-10	TCTCCTCCCGGT	10.3	4.6e-06	-12289	5337
SM_b21346	D	SM_b20901_m1	D	-218	-207	TCTCCTCCCGGT	10.3	4.6e-06	-12289	5337
SM_b21598	D	SM_b20901_m1	D	-235	-224	TCTCCTCCCACA	10.4	3.7e-06	-12507	5432
SM_b21706	R	SM_b20901_m1	R	-239	-228	CCTCCTCCCGAG	10.2	5.8e-06	-12058	5237
SM_b20901	R	SM_b20901_m2	R	-297	-283	CTGTCGAGAAAAAAC	14.6	6.9e-08	-16489	7161
SM_b20901	R	SM_b20901_m3	R	-294	-281	GACTGTCGAGAAAA	10.5	4.8e-06	-12247	5319
SMc01182	R	SM_b20901_m4	R	-26	-2	TTTTTCTCTCCACAGTGCTGCAAAG	7.8	6.1e-06	-12007	5215
SMc04239	D	SM_b20901_m4	D	-90	-66	TTATATTTTAGTCCGTCTCACAAAA	7.3	8.2e-06	-11711	5086
SMc04239	D	SM_b20901_m4	D	-88	-64	ATATTTTAGTCCGTCTCACAAAAAC	10.1	1.4e-06	-13479	5854
SMc01495	R	SM_b20901_m4	R	-153	-129	AAATTTTACCGTTTGATAAAAAAAT	7.7	6.5e-06	-11944	5187
SM_b21102	R	SM_b20901_m4	R	-108	-84	TAAATTTATCGTTTGTATATAAATC	9.4	2.2e-06	-13027	5658
SM_b20901	R	SM_b20901_m4	R	-297	-273	ATTTTCTCGACTGTCGAGAAAAAAC	13.9	8.2e-08	-16317	7086
SM_b20901	R	SM_b20901_m4	R	-295	-271	TTATTTTCTCGACTGTCGAGAAAAA	25.0	8.0e-15	-32459	14097
SM_b20901	R	SM_b20901_m5	R	-292	-280	CGACTGTCGAGAA	15.0	3.2e-08	-17258	7495
SMa0625	D	SM_b20947_m1	D	-63	-43	TCTGGAACAATGGTTGGTTCC	4.5	9.0e-06	-11618	5046
SMa0750	R	SM_b20947_m1	R	-121	-101	TTTGCAAGAATAATTGATCTG	7.1	2.3e-06	-12983	5638
SMa0751	D	SM_b20947_m1	D	-51	-31	TTTGCAAGAATAATTGATCTG	7.1	2.3e-06	-12983	5638
SM_b20947	D	SM_b20947_m1	D	-366	-346	CGTGTAACAAAAGTTGATCGG	24.8	2.5e-13	-29017	12602
SMc04194	D	SM_b20947_m2	D	-314	-294	CTGCTCAAATTTTGTTGTACA	5.2	9.8e-07	-13836	6009
SM_b21650	D	SM_b20947_m2	D	-65	-45	GCGATAAAAATTTACTAAACG	1.6	5.2e-06	-12167	5284
SMa0667	D	SM_b20947_m3	D	-345	-325	CATGCAGCAAAAGATGATCGT	1.2	6.1e-06	-12007	5215
SMa0750	R	SM_b20947_m3	R	-121	-101	TTTGCAAGAATAATTGATCTG	1.2	6.1e-06	-12007	5215
SMa0751	D	SM_b20947_m3	D	-51	-31	TTTGCAAGAATAATTGATCTG	1.2	6.1e-06	-12007	5215
SM_b20947	D	SM_b20947_m3	D	-366	-346	CGTGTAACAAAAGTTGATCGG	27.3	1.5e-13	-29528	12824
SMc02162	R	SM_b20947_m4	R	-197	-185	TGTGCGCTGCAGC	10.3	6.3e-06	-11975	5201
SMc01995	D	SM_b20947_m4	D	-203	-191	GCTGCAGTGCAGC	11.0	1.2e-06	-13633	5921
SMa0667	D	SM_b20947_m5	D	-345	-325	CATGCAGCAAAAGATGATCGT	2.6	4.8e-06	-12247	5319
SMa0750	R	SM_b20947_m5	R	-121	-101	TTTGCAAGAATAATTGATCTG	2.7	4.6e-06	-12289	5337
SMa0751	D	SM_b20947_m5	D	-51	-31	TTTGCAAGAATAATTGATCTG	2.7	4.6e-06	-12289	5337
SM_b20947	D	SM_b20947_m5	D	-366	-346	CGTGTAACAAAAGTTGATCGG	27.1	1.5e-13	-29528	12824
SM_b21021	D	SM_b21021_m1	D	-220	-206	TCATGAAATTCATGT	16.8	1.7e-08	-17890	7770
SMc00820	R	SM_b21021_m2	R	-48	-29	ATGAATATCATTAAAAACAT	8.6	3.4e-07	-14894	6469
SM_b21021	D	SM_b21021_m2	D	-227	-208	ATGTAATTCATGAAATTCAT	23.6	8.7e-12	-25468	11060
SM_b21021	D	SM_b21021_m3	D	-168	-147	GTGATAAACGACTATAGGAAGC	16.5	1.0e-08	-18421	8000
SM_b21021	D	SM_b21021_m3	D	-105	-84	CGGATTGGAACTGGGAAGAATA	12.4	3.7e-07	-14810	6432
SMa1442	R	SM_b21021_m4	R	-31	-18	TCATCATATGACTA	12.4	6.3e-07	-14278	6201
SMa2049	D	SM_b21021_m4	D	-79	-66	ATGTCACGTGACCA	11.3	2.2e-06	-13027	5658
SM_b21021	D	SM_b21021_m4	D	-175	-162	CCGTCACGTGATAA	11.4	2.0e-06	-13122	5699
SMc04882	R	SM_b21021_m5	R	-69	-60	TATGATCAGA	11.0	5.0e-06	-12206	5301
SM_b21021	D	SM_b21021_m5	D	-208	-199	TGTGATCATA	11.8	1.5e-06	-13410	5824
SMc03253	R	SM_b21079_m1	R	-357	-347	AAACTACCTAG	10.0	7.7e-06	-11774	5114
SM_b20947	D	SM_b21079_m2	D	-363	-352	GTAACAAAAGTT	10.7	4.0e-06	-12429	5398
SMc03169	D	SM_b21079_m4	D	-241	-224	CCACCAATTGGATTGAGA	7.7	8.2e-06	-11711	5086
SM_b21093	R	SM_b21093_m1	R	-106	-95	GGCTAGTCGTTT	16.4	2.5e-08	-17504	7602
SM_b21093	R	SM_b21093_m3	R	-135	-120	TTGAAATAACTTCGCT	12.5	4.9e-07	-14529	6310
SMa0825	D	SM_b21093_m4	D	-33	-21	CCGAAATAGCTTA	9.6	4.7e-06	-12268	5328
SM_b21093	R	SM_b21093_m4	R	-178	-166	CCGAAATAACGAA	11.9	1.3e-06	-13553	5886
SM_b21093	R	SM_b21093_m4	R	-132	-120	TTGAAATAACTTC	12.8	6.3e-07	-14278	6201
SM_b21093	R	SM_b21093_m5	R	-117	-95	GGCTAGTCGTTTTTGTCATAGCT	22.6	2.6e-11	-24373	10585
SMa2215	D	SM_b21102_m1	D	-114	-101	TTCACATATGCACG	8.5	5.1e-06	-12186	5292
SM_b21102	R	SM_b21102_m1	R	-44	-31	TCCATATACGCATG	12.0	6.3e-07	-14278	6201
SMc00270	R	SM_b21102_m2	R	-303	-294	AGGGAGGAGA	10.3	9.0e-06	-11618	5046
SM_b20820	D	SM_b21102_m2	D	-14	-5	AGGGAGGAGA	10.3	9.0e-06	-11618	5046
SM_b21295	R	SM_b21102_m2	R	-271	-262	AAGGAGGAAA	10.5	6.1e-06	-12007	5215
SM_b20947	D	SM_b21102_m2	D	-66	-57	CAGGAGGAGA	10.8	3.0e-06	-12717	5523
SM_b20154	R	SM_b21102_m3	R	-251	-226	TGTGCATTTTTCTGTTGACAAACGGA	-1.1	5.2e-06	-12167	5284
SM_b21102	R	SM_b21102_m3	R	-42	-17	GATGAATATTCCTCTCCATATACGCA	28.8	3.5e-14	-30983	13456
SM_b21102	R	SM_b21102_m5	R	-42	-16	AGATGAATATTCCTCTCCATATACGCA	29.1	2.7e-14	-31243	13569
SMc01592	D	SM_b21115_m1	D	-122	-109	TATGCGTAAATTTG	9.7	8.6e-06	-11664	5066
SMa2215	D	SM_b21115_m1	D	-139	-126	AATGCCTAAAATAT	11.6	1.7e-06	-13285	5770
SM_b21115	R	SM_b21115_m1	R	-186	-173	AATGCCTAAATAAT	13.3	1.6e-07	-15648	6796
SM_b21115	R	SM_b21115_m1	R	-158	-145	TATGCCTAAATATT	14.7	9.2e-09	-18504	8036
SMc02560	R	SM_b21115_m2	R	-72	-43	TCGAGATGCGTTGCAAGAATCGCGGCAACC	9.2	1.5e-06	-13410	5824
SM_b20375	R	SM_b21115_m2	R	-82	-53	TCAAGACGCGCTGCTTGAATTATTGGAAAC	8.9	1.8e-06	-13228	5745
SM_b21115	R	SM_b21115_m2	R	-140	-111	TCATGATGCGATGCAGCAATTTCCGCAATA	24.9	2.0e-13	-29240	12699
SMc02323	D	SM_b21115_m3	D	-94	-75	GTTCATGATGCGCCGCACAA	9.8	4.8e-06	-12247	5319
SM_b21115	R	SM_b21115_m3	R	-128	-109	TATCATGATGCGATGCAGCA	17.7	6.9e-10	-21094	9161
SM_b20608	R	SM_b21115_m3	R	-48	-29	CTTGATGGTTTATTGCAGCA	9.0	8.7e-06	-11652	5060
SMc01995	D	SM_b21115_m4	D	-203	-190	GCTGCAGTGCAGCA	11.9	7.6e-07	-14090	6119
SMa0319	D	SM_b21115_m4	D	-116	-103	GCTGCATTGCATCA	11.9	7.6e-07	-14090	6119
SMc04032	R	SM_b21115_m5	R	-86	-66	TTCGGATAAAATTTAGCCGTG	9.4	6.0e-06	-12024	5222
SMa2215	D	SM_b21115_m5	D	-108	-88	TATGCACGAATATTAGGCATA	15.0	3.3e-08	-17227	7481
SMc04054	D	SM_b21117_m1	D	-161	-150	TAACTTATATTC	12.6	6.2e-07	-14294	6208
SMc02560	R	SM_b21117_m2	R	-195	-185	TGCGATTCAAC	9.2	8.4e-06	-11687	5076
SM_b20004	R	SM_b21117_m2	R	-108	-98	ATCGATTCAAC	9.4	5.5e-06	-12111	5260
SMc02560	R	SM_b21117_m4	R	-238	-210	ATATTTTTCTTTAAATCGATTAATATACT	8.7	4.1e-06	-12405	5387
SMc02350	R	SM_b21117_m4	R	-69	-41	TAAATTGAATAGATTTAGTAGATAATAAT	7.8	7.3e-06	-11828	5137
SMc03287	R	SM_b21117_m4	R	-50	-22	GCAGTCCTATAAAATTTGACGCAAATACT	10.3	1.3e-06	-13553	5886
SM_b21117	R	SM_b21117_m4	R	-46	-18	CGAGTTCGAGTCAGCTTATGGCATATAAG	24.3	1.1e-13	-29838	12959
SM_b20531	D	SM_b21117_m5	D	-90	-62	TCTGCTCCCACGGCCCACCTGCGGCAAAA	9.6	5.0e-06	-12206	5301
SM_b21117	R	SM_b21117_m5	R	-75	-47	TTTGCTTGAATGGACGCCGCGATGCAATC	20.4	3.4e-12	-26407	11469
SMc04363	R	SM_b21158_m1	R	-30	-13	ATGAAACTGTCGTTTCAC	10.4	4.4e-06	-12334	5357
SMc01615	R	SM_b21158_m1	R	-57	-40	GGGAAAGGTAACATTCTT	11.1	1.4e-06	-13479	5854
SM_b21158	D	SM_b21158_m2	D	-18	-8	GGAAGGGCGCC	11.8	8.7e-07	-13955	6060
SM_b21169	D	SM_b21169_m1	D	-10	-1	TTGAACTATT	11.4	2.3e-06	-12983	5638
SM_b21222	D	SM_b21169_m2	D	-42	-25	TTCTTGTTCAATAGTCCA	12.5	4.7e-07	-14571	6328
SM_b21169	D	SM_b21169_m2	D	-27	-10	CGCTTGTTCAAAAAATAT	12.8	3.6e-07	-14837	6444
SM_b21574	D	SM_b21169_m2	D	-361	-344	CCGTTGTTCAAGAGCTTT	9.2	6.4e-06	-11959	5194
SM_b21169	D	SM_b21169_m3	D	-24	-3	TTGTTCAAAAAATATTGAACTA	21.9	1.4e-12	-27295	11854
SMc04194	D	SM_b21169_m4	D	-316	-291	GGCTGCTCAAATTTTGTTGTACAAAT	1.6	7.3e-06	-11828	5137
SM_b21169	D	SM_b21169_m4	D	-26	-1	GCTTGTTCAAAAAATATTGAACTATT	24.8	1.6e-12	-27161	11796
SMc04194	D	SM_b21169_m5	D	-317	-290	AGGCTGCTCAAATTTTGTTGTACAAATG	1.9	3.6e-06	-12535	5444
SM_b21299	D	SM_b21169_m5	D	-212	-185	CGATTGTACATCACTTTTTCAACCTTCG	0.1	7.8e-06	-11761	5108
SMc01551	D	SM_b21180_m2	D	-145	-133	TAAGGCTGTCAAA	10.4	4.0e-06	-12429	5398
SMa1136	D	SM_b21180_m2	D	-194	-182	AAAGGCTTTCATT	11.9	1.0e-06	-13816	6000
SM_b21180	R	SM_b21180_m4	R	-90	-72	CCAATGCGTCGATCAGATG	20.9	2.1e-11	-24586	10678
SMc03169	D	SM_b21180_m5	D	-172	-156	GCATATCAAGAGGAAAT	9.0	6.5e-06	-11944	5187
SM_b21180	R	SM_b21180_m5	R	-49	-33	GCATATTCAGAAGAATG	19.0	1.2e-10	-22844	9921
SMc02560	R	SM_b21208_m1	R	-240	-217	TCTTTAAATCGATTAATATACTGA	5.5	2.2e-06	-13027	5658
SMc02560	R	SM_b21208_m1	R	-236	-213	TTTTTCTTTAAATCGATTAATATA	4.6	3.3e-06	-12622	5481
SMa0097	R	SM_b21208_m1	R	-65	-42	TAAGTCATTCAATCGAAATAGGTA	7.2	1.1e-06	-13720	5959
SM_b20203	D	SM_b21208_m1	D	-49	-26	AAATTTATTCATTTGACTTCATAA	7.0	1.2e-06	-13633	5921
SM_b21208	R	SM_b21208_m1	R	-35	-12	TAAGTCAATCGATCGAATGAACTC	15.0	1.5e-08	-18015	7824
SM_b21208	R	SM_b21208_m1	R	-31	-8	CGACTAAGTCAATCGATCGAATGA	12.6	6.6e-08	-16534	7180
SM_b21535	R	SM_b21208_m1	R	-46	-23	TGATCTAATCAAACGATAGAAACG	5.1	2.8e-06	-12786	5553
SMa0347	D	SM_b21208_m2	D	-43	-27	ATTATTCCAATCGATTG	10.4	1.3e-06	-13553	5886
SMa0498	R	SM_b21208_m2	R	-27	-11	AATTTTTCTATCGATAG	10.6	1.1e-06	-13720	5959
SM_b21208	R	SM_b21208_m2	R	-26	-10	ACTAAGTCAATCGATCG	16.3	1.2e-08	-18238	7921
SMc02172	R	SM_b21208_m3	R	-221	-211	AATAATTCAAT	10.6	4.3e-06	-12357	5367
SM_b21102	R	SM_b21208_m3	R	-111	-101	TATAAATCAGT	9.8	8.6e-06	-11664	5066
SM_b21222	D	SM_b21208_m3	D	-66	-56	ATTAAGTCAAT	12.7	3.1e-07	-14987	6509
SM_b21208	R	SM_b21208_m3	R	-20	-10	ACTAAGTCAAT	13.8	5.7e-08	-16680	7244
SMa0097	R	SM_b21208_m4	R	-61	-45	GTCATTCAATCGAAATA	6.5	5.6e-06	-12093	5252
SM_b21208	R	SM_b21208_m4	R	-31	-15	GTCAATCGATCGAATGA	13.8	8.6e-08	-16269	7066
SM_b21535	R	SM_b21208_m4	R	-42	-26	TCTAATCAAACGATAGA	5.7	7.6e-06	-11787	5119
SMc02560	R	SM_b21208_m5	R	-242	-221	TAAATCGATTAATATACTGAAT	5.7	4.2e-06	-12380	5377
SMc02560	R	SM_b21208_m5	R	-238	-217	TCTTTAAATCGATTAATATACT	8.8	8.7e-07	-13955	6060
SMc02560	R	SM_b21208_m5	R	-208	-187	CGATTCAACCGATTAAAAAATG	7.0	2.2e-06	-13027	5658
SMc03046	D	SM_b21208_m5	D	-113	-92	ATTCTTAATCAACTATTAAAAT	4.3	7.5e-06	-11801	5125
SMc00095	R	SM_b21208_m5	R	-57	-36	TTGATCCATCAATCAATAAAAA	3.8	9.3e-06	-11585	5032
SMa0097	R	SM_b21208_m5	R	-63	-42	TAAGTCATTCAATCGAAATAGG	7.8	1.4e-06	-13479	5854
SM_b20203	D	SM_b21208_m5	D	-49	-28	AAATTTATTCATTTGACTTCAT	4.4	7.1e-06	-11855	5149
SM_b21208	R	SM_b21208_m5	R	-33	-12	TAAGTCAATCGATCGAATGAAC	15.7	1.2e-08	-18238	7921
SM_b21535	R	SM_b21208_m5	R	-44	-23	TGATCTAATCAAACGATAGAAA	4.6	6.5e-06	-11944	5187
SM_b21210	R	SM_b21210_m2	R	-143	-131	TTCCGACAGCTCG	13.4	1.9e-07	-15476	6721
SM_b21210	R	SM_b21210_m2	R	-132	-120	TCCCGACAGCTTT	14.3	2.9e-08	-17356	7538
SMc01819	R	SM_b21210_m3	R	-53	-24	CAGGCATATGACGTCCGGCGCGGGCTGCCC	5.3	7.6e-06	-11787	5119
SM_b21210	R	SM_b21210_m3	R	-70	-41	GGACCATAGGACGTTTTTTCCGAGGTGCCA	26.4	1.8e-14	-31648	13745
SM_b21210	R	SM_b21210_m4	R	-159	-144	TCCAGGCTACTGGGCA	18.2	9.3e-11	-23098	10032
SMc00679	D	SM_b21210_m5	D	-61	-40	GACAACCTATCTGCCCCCTGTC	7.6	8.6e-06	-11664	5066
SM_b21210	R	SM_b21210_m5	R	-88	-67	GCCAACTTGTGAAGTCCCTGCC	24.6	7.2e-14	-30262	13143
SM_b21222	D	SM_b21222_m1	D	-69	-52	CTTATTAAGTCAATTGTC	18.6	5.8e-10	-21268	9237
SMc02172	R	SM_b21222_m2	R	-237	-209	ATAATAATTCAATTTGATTTATTTATTGA	13.9	1.1e-09	-20628	8959
SMc01592	D	SM_b21222_m2	D	-75	-47	GAAATATGTCAACCAAACTGACATATATT	2.2	2.9e-07	-15053	6538
SMa2008	R	SM_b21222_m2	R	-32	-4	TAATTATAAAACGTAACGTAACGTAACTA	-5.9	6.6e-06	-11928	5180
SMa2009	D	SM_b21222_m2	D	-55	-27	TAATTATAAAACGTAACGTAACGTAACTA	-5.9	6.6e-06	-11928	5180
SMa2215	D	SM_b21222_m2	D	-155	-127	GCAAAAAAACAAGTAAAATGCCTAAAATA	-5.0	4.8e-06	-12247	5319
SM_b20203	D	SM_b21222_m2	D	-54	-26	TTGTAAAATTTATTCATTTGACTTCATAA	-1.3	1.2e-06	-13633	5921
SM_b20375	R	SM_b21222_m2	R	-78	-50	CCGTCAAGACGCGCTGCTTGAATTATTGG	-6.9	9.8e-06	-11533	5009
SM_b21222	D	SM_b21222_m2	D	-68	-40	TTATTAAGTCAATTGTCTTGACTTATTTC	31.9	1.3e-15	-34276	14886
SMc01403	R	SM_b21222_m3	R	-201	-192	CAGGGAACGC	11.3	3.0e-06	-12717	5523
SMc02172	R	SM_b21222_m4	R	-231	-211	AATAATTCAATTTGATTTATT	8.4	1.7e-06	-13285	5770
SMa0750	R	SM_b21222_m4	R	-129	-109	AATAATTGATCTGAATTGAAC	5.6	7.9e-06	-11749	5102
SMa0751	D	SM_b21222_m4	D	-43	-23	AATAATTGATCTGAATTGAAC	5.6	7.9e-06	-11749	5102
SM_b21222	D	SM_b21222_m4	D	-66	-46	ATTAAGTCAATTGTCTTGACT	23.9	2.3e-12	-26798	11638
SMc00529	R	SM_b21222_m5	R	-171	-159	TTAGTCAAGACAG	11.5	2.7e-06	-12822	5569
SMa0267	D	SM_b21222_m5	D	-24	-12	TATGTCAATAAGC	10.4	7.5e-06	-11801	5125
SM_b20365	R	SM_b21222_m5	R	-95	-83	AGTGTCAATAAGA	10.3	8.1e-06	-11724	5092
SM_b20366	D	SM_b21222_m5	D	-99	-87	AGTGTCAATAAGA	10.3	8.1e-06	-11724	5092
SM_b21222	D	SM_b21222_m5	D	-22	-10	TGTGTCAAGAGGG	12.5	5.1e-07	-14489	6292
SMc01182	R	SM_b21291_m1	R	-165	-147	ACACTTTTCCTGAAAGTGC	12.8	2.7e-07	-15125	6569
SMa0190	D	SM_b21291_m1	D	-59	-41	ACACTTTTCCTGGAAGTGC	12.0	4.7e-07	-14571	6328
SM_b21291	R	SM_b21291_m1	R	-78	-60	TAGTTTTTTTTGAAAGAGT	17.1	5.0e-09	-19114	8301
SM_b21291	R	SM_b21291_m2	R	-77	-51	TCGATTTTATAGTTTTTTTTGAAAGAG	25.0	1.4e-12	-27295	11854
SM_b21291	R	SM_b21291_m3	R	-144	-134	AGAAATGGGGA	10.6	3.0e-06	-12717	5523
SMc01495	R	SM_b21291_m5	R	-156	-144	ATAAAAAAATAAA	8.3	6.3e-06	-11975	5201
SM_b21299	D	SM_b21299_m1	D	-63	-44	CGTGTGATATTTCTCACAGA	18.8	5.5e-10	-21321	9260
SM_b21300	D	SM_b21299_m1	D	-78	-59	CTTGTTAGAAAACTAACATT	13.9	1.0e-07	-16118	7000
SMc00800	R	SM_b21299_m2	R	-264	-249	ATAAAACTGTCACAAA	9.4	6.5e-06	-11944	5187
SM_b21299	D	SM_b21299_m2	D	-59	-44	TGATATTTCTCACAGA	16.1	6.8e-09	-18806	8167
SM_b21300	D	SM_b21299_m2	D	-74	-59	TTAGAAAACTAACATT	9.2	8.1e-06	-11724	5092
SMc00800	R	SM_b21299_m3	R	-264	-245	TGTCATAAAACTGTCACAAA	7.7	5.5e-06	-12111	5260
SMa1136	D	SM_b21299_m3	D	-121	-102	TCTGGAAAATTTCTCTCAAG	7.6	5.8e-06	-12058	5237
SM_b21299	D	SM_b21299_m3	D	-63	-44	CGTGTGATATTTCTCACAGA	20.0	1.3e-10	-22763	9886
SM_b21300	D	SM_b21299_m3	D	-78	-59	CTTGTTAGAAAACTAACATT	11.7	4.4e-07	-14636	6357
SM_b21299	D	SM_b21299_m4	D	-73	-44	CCGAGGCGATCGTGTGATATTTCTCACAGA	30.4	7.9e-18	-39380	17102
SMc03843	R	SM_b21299_m5	R	-96	-83	TTCAGGGATAAACC	9.8	8.8e-06	-11641	5056
SM_b21299	D	SM_b21299_m5	D	-154	-141	TTCAGGGACAACCC	15.8	3.1e-09	-19592	8509
SM_b21336	D	SM_b21336_m1	D	-226	-201	GCAGTTTGGGTCCAGTGGGACGGACT	30.2	6.2e-17	-37319	16208
SMc00877	D	SM_b21336_m2	D	-41	-30	ACACGGGCGAAA	10.1	8.2e-06	-11711	5086
SMc02391	R	SM_b21336_m2	R	-101	-90	TAACGGGCGAAC	11.3	1.3e-06	-13553	5886
SM_b21706	R	SM_b21336_m2	R	-152	-141	AAACGGTCGAAA	9.9	9.7e-06	-11543	5013
SM_b21169	D	SM_b21336_m3	D	-22	-6	GTTCAAAAAATATTGAA	9.8	7.7e-06	-11774	5114
SM_b21336	D	SM_b21336_m4	D	-237	-223	GCCCGTTTGCGGCAG	13.3	4.6e-09	-19197	8337
SMa2167	D	SM_b21346_m1	D	-339	-315	TAACATAGATAATATGAGTGTAGAA	3.6	9.2e-06	-11596	5036
SM_b21345	R	SM_b21346_m1	R	-123	-99	CAAGGCTAAAGTTATTAGCACATGC	20.5	1.6e-10	-22556	9796
SM_b21345	R	SM_b21346_m1	R	-101	-77	TTGCGCTAATATTATTAGCAGTCAA	23.7	3.3e-12	-26437	11481
SM_b21346	D	SM_b21346_m1	D	-151	-127	TTGCGCTAATATTATTAGCAGTCAA	23.7	3.3e-12	-26437	11481
SM_b21346	D	SM_b21346_m1	D	-129	-105	CAAGGCTAAAGTTATTAGCACATGC	20.5	1.6e-10	-22556	9796
SMc00109	R	SM_b21346_m3	R	-190	-171	ATAATATTCAAAATCAATAA	9.5	5.1e-06	-12186	5292
SMa1948	D	SM_b21346_m3	D	-79	-60	GTAATACCGATCCGCAATAC	9.4	5.1e-06	-12186	5292
SM_b21345	R	SM_b21346_m3	R	-182	-163	GAAATGGCAAAGGGCAATGG	12.9	3.6e-07	-14837	6444
SM_b21346	D	SM_b21346_m3	D	-65	-46	GAAATGGCAAAGGGCAATGG	12.9	3.6e-07	-14837	6444
SMc03101	R	SM_b21346_m4	R	-126	-117	CTCCTCCCGA	10.7	7.4e-06	-11814	5131
SM_b21345	R	SM_b21346_m4	R	-20	-11	CTCCTCCCGG	10.8	5.1e-06	-12186	5292
SM_b21346	D	SM_b21346_m4	D	-217	-208	CTCCTCCCGG	10.8	5.1e-06	-12186	5292
SM_b21706	R	SM_b21346_m4	R	-238	-229	CTCCTCCCGA	10.7	7.4e-06	-11814	5131
SMc02350	R	SM_b21346_m5	R	-67	-55	TTAGTAGATAATA	7.2	6.5e-06	-11944	5187
SM_b21345	R	SM_b21346_m5	R	-118	-106	AAAGTTATTAGCA	14.9	4.3e-08	-16962	7367
SM_b21346	D	SM_b21346_m5	D	-122	-110	AAAGTTATTAGCA	14.9	4.3e-08	-16962	7367
SMc02851	D	SM_b21359_m2	D	-202	-189	TCCCCCTCTCCGGG	11.4	2.5e-06	-12899	5602
SM_b21359	D	SM_b21359_m2	D	-107	-94	GTCCCAGCTCCGAA	13.7	3.6e-08	-17140	7444
SM_b21359	D	SM_b21359_m2	D	-91	-78	AGCCCATGTCCGTG	12.1	1.0e-06	-13816	6000
SM_b20859	D	SM_b21359_m2	D	-200	-187	TTCCCCCCTCCGGG	11.6	2.0e-06	-13122	5699
SMa0520	D	SM_b21359_m3	D	-281	-266	AGCCGCAGCGGCTCCA	9.9	2.9e-06	-12751	5538
SM_b21359	D	SM_b21359_m3	D	-111	-96	AGCCGTCCCAGCTCCG	14.8	9.3e-08	-16191	7032
SM_b20465	R	SM_b21359_m4	R	-66	-55	CAACGTAGCGGG	11.9	6.3e-07	-14278	6201
SM_b21336	D	SM_b21359_m4	D	-172	-161	AGACGTTGCGAC	10.7	7.0e-06	-11870	5155
SM_b21359	D	SM_b21359_m4	D	-129	-118	AGACGGTGCGGG	11.6	1.3e-06	-13553	5886
SM_b21359	D	SM_b21359_m4	D	-28	-17	CAACGTAGCGTC	12.4	2.1e-07	-15376	6678
SMc00766	D	SM_b21359_m5	D	-165	-139	GGCTCGAACCTCTCGTCCCAGGGACGG	5.4	2.0e-06	-13122	5699
SM_b20525	D	SM_b21359_m5	D	-179	-153	GCATGTGACCTTCATGCACACCGACAT	4.1	3.9e-06	-12455	5409
SM_b21372	R	SM_b21372_m1	R	-36	-11	ATCTTTCGGAATATTCACCGATCACG	19.5	9.6e-11	-23067	10018
SMc01728	D	SM_b21372_m2	D	-73	-62	GATCGGCGAACA	10.0	7.2e-06	-11841	5143
SMc02172	R	SM_b21372_m3	R	-101	-92	CCGATCACGG	11.1	2.2e-06	-13027	5658
SMc01982	D	SM_b21372_m3	D	-28	-19	CCGATCACGG	11.1	2.2e-06	-13027	5658
SM_b21372	R	SM_b21372_m3	R	-37	-28	CCGATCACGG	11.1	2.2e-06	-13027	5658
SM_b20869	D	SM_b21372_m3	D	-257	-248	TCGATCACGG	10.7	6.0e-06	-12024	5222
SMc02391	R	SM_b21372_m4	R	-145	-125	TATATTACGCGTACGTAAAGG	9.6	9.4e-06	-11575	5027
SM_b20004	R	SM_b21372_m4	R	-36	-16	ATTATTGCACCATGTGAAATG	10.0	6.0e-06	-12024	5222
SM_b21079	D	SM_b21372_m4	D	-40	-20	TATATTATGCAAGTTTAAAGA	10.4	3.8e-06	-12481	5420
SMc00329	D	SM_b21385_m1	D	-245	-229	GCGGGCTAAGGAAAGCT	8.6	7.4e-06	-11814	5131
SMc00953	R	SM_b21385_m1	R	-80	-64	GCATGAAAAGGCAAGAA	10.2	2.5e-06	-12899	5602
SM_b20455	R	SM_b21385_m1	R	-72	-56	GCAAGCTCGGGCAAGTT	11.4	1.0e-06	-13816	6000
SM_b20947	D	SM_b21385_m1	D	-64	-48	GGAGGAGAGGGCAACAA	10.5	2.0e-06	-13122	5699
SMc00953	R	SM_b21385_m2	R	-80	-64	GCATGAAAAGGCAAGAA	10.6	1.8e-06	-13228	5745
SM_b20455	R	SM_b21385_m2	R	-72	-56	GCAAGCTCGGGCAAGTT	12.3	5.0e-07	-14509	6301
SM_b20947	D	SM_b21385_m2	D	-64	-48	GGAGGAGAGGGCAACAA	8.2	8.7e-06	-11652	5060
SM_b21115	R	SM_b21385_m4	R	-23	-7	ACCTTGCCGTGTCCTGC	10.1	1.8e-06	-13228	5745
SM_b21385	D	SM_b21385_m4	D	-102	-86	AGCTTGCCCTGGCCTGC	15.0	4.5e-08	-16917	7347
SM_b21385	D	SM_b21385_m4	D	-81	-65	AACTTGCCTTATCCTGC	18.7	3.3e-10	-21832	9481
SMc00256	R	SM_b21385_m5	R	-33	-15	TATGCGTGATATGTCAAAT	8.5	9.0e-06	-11618	5046
SMc02351	R	SM_b21385_m5	R	-91	-73	ACTGCAGAATGCGGCAATC	8.5	9.0e-06	-11618	5046
SMc03210	R	SM_b21385_m5	R	-64	-46	CCTGCTGAATCACGCAAGA	12.6	4.7e-07	-14571	6328
SM_b20441	D	SM_b21385_m5	D	-191	-173	CCTGCAGGGATAGCCAATT	8.7	8.0e-06	-11736	5097
SMc02893	D	SM_b21464_m1	D	-35	-15	GTGCCTGGATAAAACCTGTGC	5.3	4.0e-06	-12429	5398
SM_b21464	D	SM_b21464_m1	D	-185	-165	GCTACTGGATATAACCAGTTA	24.8	1.1e-12	-27536	11959
SMc00658	R	SM_b21464_m2	R	-351	-324	CAAATGGTTATCAACGGTTTAGGCAATT	12.3	3.4e-08	-17197	7469
SMa0872	D	SM_b21464_m2	D	-54	-27	CAACTGCCGATGCATGTCGTAGTCAGCG	3.3	5.5e-06	-12111	5260
SM_b21464	D	SM_b21464_m2	D	-184	-157	CTACTGGATATAACCAGTTATGTCAATT	33.7	1.2e-18	-41264	17921
SM_b21464	D	SM_b21464_m2	D	-131	-104	CCACTGCCGATCGCCGGCGTAGTCAGCG	19.3	2.5e-10	-22110	9602
SMa0872	D	SM_b21464_m3	D	-37	-28	CGTAGTCAGC	13.1	4.0e-07	-14732	6398
SM_b21464	D	SM_b21464_m3	D	-114	-105	CGTAGTCAGC	13.1	4.0e-07	-14732	6398
SMc01450	D	SM_b21464_m4	D	-164	-145	TGACTCGTCATAAACAGACG	5.4	2.0e-06	-13122	5699
SM_b21464	D	SM_b21464_m4	D	-184	-165	CTACTGGATATAACCAGTTA	25.3	7.8e-13	-27879	12108
SM_b21079	D	SM_b21464_m5	D	-133	-113	ACAACTAATTATGCCAAGTCA	2.2	7.0e-06	-11870	5155
SM_b21464	D	SM_b21464_m5	D	-185	-165	GCTACTGGATATAACCAGTTA	25.5	8.5e-13	-27794	12071
SM_b21484	D	SM_b21484	D	-23	-12	GGCAGAAGGGCA	11.7	3.9e-07	-14757	6409
SMc03060	R	SM_b21484	R	-188	-169	GGAAGGAAAGCTCTTGACTC	10.1	5.0e-06	-12206	5301
SM_b21300	D	SM_b21484	D	-14	-5	GGGAGAAATC	11.1	4.0e-06	-12429	5398
SM_b21484	D	SM_b21484	D	-39	-30	TGGAGAAATC	10.9	6.4e-06	-11959	5194
SMc00953	R	SM_b21484	R	-140	-130	CAATATACGAC	9.7	8.4e-06	-11687	5076
SMc04239	D	SM_b21484	D	-275	-265	CAATATTCGCC	10.7	3.4e-06	-12592	5469
SM_b21484	D	SM_b21484	D	-13	-3	CAATATTCGAC	13.5	3.1e-07	-14987	6509
SMa0372	R	SM_b21493_m1	R	-49	-36	GGAATATTGCAATT	10.2	8.4e-06	-11687	5076
SM_b20365	R	SM_b21493_m1	R	-151	-138	AAAATAGTGCAATT	11.4	1.5e-06	-13410	5824
SM_b20366	D	SM_b21493_m1	D	-44	-31	AAAATAGTGCAATT	11.4	1.5e-06	-13410	5824
SM_b21493	R	SM_b21493_m1	R	-111	-98	GGAATACAGCAAGC	12.4	2.3e-07	-15285	6638
SM_b21493	R	SM_b21493_m2	R	-33	-14	CGACTGGAAAAATTGCTCAG	21.8	1.6e-12	-27161	11796
SM_b21345	R	SM_b21493_m3	R	-174	-160	AACGAAATGGCAAAG	11.0	2.5e-06	-12899	5602
SM_b21346	D	SM_b21493_m3	D	-68	-54	AACGAAATGGCAAAG	11.0	2.5e-06	-12899	5602
SMa5007	R	SM_b21493_m4	R	-123	-103	CCAGCCCCACGATGCGGTACT	7.9	5.2e-06	-12167	5284
SM_b21493	R	SM_b21493_m4	R	-90	-70	CCAGCGCGCTCAATCGCTACC	18.6	9.2e-10	-20807	9036
SM_b21493	R	SM_b21493_m5	R	-33	-14	CGACTGGAAAAATTGCTCAG	12.8	3.1e-07	-14987	6509
SMc01488	R	SM_b21533_m1	R	-32	-16	CCAAAAAATATGACATA	10.8	1.3e-06	-13553	5886
SMa2015	R	SM_b21533_m1	R	-395	-379	CCACCAAAAACGACAAA	9.7	2.7e-06	-12822	5569
SM_b21533	D	SM_b21533_m1	D	-116	-100	TCACAAAACATCACAAA	19.7	4.8e-11	-23760	10319
SMa1339	D	SM_b21533_m2	D	-52	-37	AACACATGGCGCAAGT	10.5	3.1e-06	-12684	5509
SM_b21533	D	SM_b21533_m2	D	-107	-92	ATCACAAATCGCAAAT	14.8	4.3e-08	-16962	7367
SM_b21533	D	SM_b21533_m2	D	-26	-11	CACAAATATTGCAACA	15.5	1.3e-08	-18158	7886
SM_b21533	D	SM_b21533_m3	D	-74	-62	CCGTCCTGCACCG	13.8	6.6e-08	-16534	7180
SM_b21533	D	SM_b21533_m4	D	-89	-67	TGCACCGCATCGCAGCCGTCCTG	20.5	1.3e-10	-22763	9886
SM_b21533	D	SM_b21533_m4	D	-68	-46	TGCACCGCGCGCTTCATGTCCGC	20.1	2.2e-10	-22237	9658
SM_b21533	D	SM_b21533_m5	D	-122	-110	TACGGCTCACAAA	16.2	7.0e-09	-18777	8155
SMc01945	D	SM_b21535_m1	D	-82	-70	GCGAACGATTTAT	9.1	3.8e-06	-12481	5420
SM_b21535	R	SM_b21535_m1	R	-56	-44	ACGAACGATTTGA	11.2	1.0e-06	-13816	6000
SMc01664	D	SM_b21535_m2	D	-53	-33	TTGATCGAAGAATTCGATTAG	10.6	2.8e-06	-12786	5553
SM_b21535	R	SM_b21535_m2	R	-55	-35	ACGATAGAAACGAACGATTTG	14.0	1.2e-07	-15936	6921
SM_b21535	R	SM_b21535_m2	R	-42	-22	CTGATCTAATCAAACGATAGA	15.3	2.4e-08	-17545	7620
SMc04348	R	SM_b21535_m3	R	-287	-270	GAGATAGAGAAAATCGAT	4.8	9.8e-06	-11533	5009
SMa0355	D	SM_b21535_m3	D	-60	-43	TAGAGCAATCAAATCGGG	5.2	8.0e-06	-11736	5097
SMc02229	R	SM_b21535_m4	R	-131	-109	CGAACTTTGACGTTTGCGTAAAC	6.6	4.4e-06	-12334	5357
SMc01995	D	SM_b21535_m4	D	-34	-12	GTAACGCTTAGTGTTATATATAG	8.3	1.6e-06	-13346	5796
SM_b21535	R	SM_b21535_m4	R	-67	-45	CGAACGATTTGATTTATGTAAAG	27.5	9.3e-15	-32309	14032
SM_b21535	R	SM_b21535_m5	R	-51	-36	CGATAGAAACGAACGA	16.1	1.1e-08	-18325	7959
SMc00107	R	SM_b21569_m1	R	-38	-24	CTCCTGACACGACCT	10.1	3.4e-06	-12592	5469
SMc01981	D	SM_b21569_m1	D	-166	-152	TACCTAGAAGGAGCA	9.9	3.9e-06	-12455	5409
SM_b21569	R	SM_b21569_m2	R	-45	-33	GGGGACCTGCCTG	14.0	1.8e-08	-17833	7745
SMc00953	R	SM_b21569_m4	R	-24	-4	GGCAGGAAGGCCCTAACCCTG	9.1	4.2e-06	-12380	5377
SMa1505	D	SM_b21569_m5	D	-182	-168	GCTCCTTGATGGACT	11.8	1.1e-06	-13720	5959
SM_b21569	R	SM_b21569_m5	R	-22	-8	GGTCCTTCTAGGAGT	15.4	9.6e-09	-18462	8018
SMc00429	R	SM_b21579	R	-101	-87	GTAGGCTTGGCAGCG	10.8	2.1e-06	-13074	5678
SMa1749	R	SM_b21579	R	-325	-311	GGAGGAAGGTCAGGG	13.1	2.8e-07	-15088	6553
SMc01225	R	SM_b21579	R	-30	-3	AAAGGCTCAGCCGGAGAAGCTTGCCACT	6.1	8.5e-06	-11675	5071
SMa0355	D	SM_b21579	D	-145	-118	AAAGGCGCAGCCACGACGAGCGGGCACT	8.9	1.6e-06	-13346	5796
SMa0753	D	SM_b21579	D	-160	-133	CAATGGCCGCTCGAATAGGCAGGGAAGT	7.1	4.7e-06	-12268	5328
SM_b21579	D	SM_b21579	D	-51	-24	CGAGGGCGACCGGCTGCCGCAAGCCACG	9.0	1.5e-06	-13410	5824
SMc02366	D	SM_b21579	D	-118	-91	TGAGGGGGCGCCGCGACATAAAGCCATG	8.0	9.7e-06	-11543	5013
SM_b21579	D	SM_b21579	D	-51	-24	CGAGGGCGACCGGCTGCCGCAAGCCACG	23.6	3.0e-14	-31138	13523
SMc01118	D	SM_b21579	D	-195	-171	GCATCCTTTGCTTACTGTTTGGCTT	12.7	5.0e-08	-16811	7301
SM_b21579	D	SM_b21579	D	-32	-9	CAAGCCACGCTCGCAGAAAAGGAG	16.6	4.9e-11	-23739	10310
SMc02172	R	SM_b21598_m1	R	-84	-63	GTACCTTAAAGCTTTACCGCGA	5.7	2.1e-06	-13074	5678
SM_b21598	D	SM_b21598_m1	D	-198	-177	CCACCGTAAACGTTTACGGAAC	24.8	1.4e-12	-27295	11854
SMc01226	R	SM_b21598_m2	R	-222	-211	TGGGGAGGAGAA	10.0	7.7e-06	-11774	5114
SM_b20033	R	SM_b21598_m2	R	-242	-231	TGGGGAGGAGAA	10.0	7.7e-06	-11774	5114
SM_b21295	R	SM_b21598_m2	R	-272	-261	AAAGGAGGAAAA	10.3	6.0e-06	-12024	5222
SM_b21598	D	SM_b21598_m2	D	-23	-12	TAGAGAGGAAAA	12.2	7.6e-07	-14090	6119
SMc04134	D	SM_b21598_m3	D	-192	-181	TCCTCCTCCCTT	12.1	8.6e-07	-13966	6066
SMc04161	R	SM_b21598_m3	R	-18	-7	TCCTCCTCCCGT	11.8	1.4e-06	-13479	5854
SMc03122	R	SM_b21598_m3	R	-13	-2	TGTCCCTCCCTT	9.7	9.6e-06	-11554	5018
SMc02470	D	SM_b21598_m3	D	-229	-218	TTCTCCTCCCAT	11.0	2.9e-06	-12751	5538
SMa1334	R	SM_b21598_m3	R	-14	-3	CTCTCCTCCCCG	10.8	3.9e-06	-12455	5409
SMa5030	D	SM_b21598_m3	D	-83	-72	CTCTCCTCCCCG	10.8	3.9e-06	-12455	5409
SMc02172	R	SM_b21598_m4	R	-84	-63	GTACCTTAAAGCTTTACCGCGA	4.7	4.1e-06	-12405	5387
SMa1797	D	SM_b21598_m4	D	-34	-13	TTTTCGTCACCCTTTACGGCGT	3.0	9.2e-06	-11596	5036
SM_b21598	D	SM_b21598_m4	D	-198	-177	CCACCGTAAACGTTTACGGAAC	24.7	1.4e-12	-27295	11854
SMc02172	R	SM_b21598_m5	R	-84	-63	GTACCTTAAAGCTTTACCGCGA	3.8	4.5e-06	-12311	5347
SMa1797	D	SM_b21598_m5	D	-34	-13	TTTTCGTCACCCTTTACGGCGT	2.2	9.2e-06	-11596	5036
SM_b21598	D	SM_b21598_m5	D	-198	-177	CCACCGTAAACGTTTACGGAAC	24.8	1.5e-12	-27226	11824
SMc01004	R	SM_b21641_m1	R	-36	-19	CAGCGCCGCGCGTCTTGA	12.7	4.3e-07	-14659	6367
SMc02113	D	SM_b21641_m1	D	-155	-138	ATAAGACGCGCGGCGCTG	14.8	5.4e-08	-16734	7268
SMc00949	D	SM_b21641_m1	D	-72	-55	CGGAGGCGCGCGCCTCTT	9.8	4.3e-06	-12357	5367
SMc04319	D	SM_b21641_m1	D	-95	-78	AAAAGACGCGCGGCGCTC	11.9	8.4e-07	-13990	6076
SMc03820	R	SM_b21641_m1	R	-175	-158	ATGAGACGCACGGCGTTG	10.1	3.7e-06	-12507	5432
SM_b20859	D	SM_b21641_m1	D	-314	-297	ATAAGACGCGCGGCGCTG	14.8	5.4e-08	-16734	7268
SM_b21641	R	SM_b21641_m1	R	-216	-199	ATGAGACGCGCGGCGCTG	16.1	8.2e-09	-18619	8086
SMc02113	D	SM_b21641_m2	D	-153	-138	AAGACGCGCGGCGCTG	13.0	1.2e-07	-15936	6921
SMc04319	D	SM_b21641_m2	D	-93	-78	AAGACGCGCGGCGCTC	11.2	1.6e-06	-13346	5796
SMc03123	D	SM_b21641_m2	D	-30	-15	CAGACGCGCAGCGTTG	11.3	1.4e-06	-13479	5854
SMc03820	R	SM_b21641_m2	R	-175	-160	GAGACGCACGGCGTTG	12.4	3.1e-07	-14987	6509
SM_b20859	D	SM_b21641_m2	D	-312	-297	AAGACGCGCGGCGCTG	13.0	1.2e-07	-15936	6921
SM_b20717	R	SM_b21641_m2	R	-121	-106	AGAACGCGCGGCGCTG	9.6	9.7e-06	-11543	5013
SM_b21641	R	SM_b21641_m2	R	-216	-201	GAGACGCGCGGCGCTG	14.4	3.2e-09	-19560	8495
SMc01450	D	SM_b21641_m3	D	-192	-179	TGAAATGGTCTATA	10.4	4.1e-06	-12405	5387
SM_b21641	R	SM_b21641_m3	R	-155	-142	TGAAACGCTCTAAA	14.9	9.1e-09	-18515	8041
SM_b21641	R	SM_b21641_m4	R	-40	-23	GCCGCACGGTTCCTCATC	9.5	9.0e-06	-11618	5046
SMc00800	R	SM_b21641_m5	R	-203	-191	TGCCGCGCGTCCC	10.1	6.4e-06	-11959	5194
SMc01004	R	SM_b21641_m5	R	-34	-22	CGCCGCGCGTCTT	10.7	3.9e-06	-12455	5409
SMc02523	R	SM_b21641_m5	R	-103	-91	CGCCGCGAGTCTC	11.6	1.6e-06	-13346	5796
SM_b21641	R	SM_b21641_m5	R	-244	-232	AGCCGCTCGTGCC	10.9	3.2e-06	-12652	5495
SM_b21641	R	SM_b21641_m5	R	-198	-186	CGCCGCGCGTCCG	12.0	8.0e-07	-14039	6097
SMc01630	R	SM_b21649_m2	R	-79	-65	GAAATACCTCTCTTG	7.9	9.8e-06	-11533	5009
SM_b21649	D	SM_b21649_m3	D	-24	-1	ACTAGAGAGGTATTGTGCTTTCAT	11.7	4.8e-09	-19155	8319
SMa0773	D	SM_b21649_m5	D	-103	-89	TCAGGGCTTGATCGG	10.1	3.2e-06	-12652	5495
SM_b21649	D	SM_b21649_m5	D	-158	-144	AAAGGGTAAAATCAG	12.0	9.2e-07	-13899	6036
SM_b20033	R	SM_b21650_m1	R	-166	-157	TTAGTACATT	10.3	2.9e-06	-12751	5538
SMc02391	R	SM_b21650_m2	R	-265	-252	ATTTTCGTAAAATT	8.3	8.6e-06	-11664	5066
SMc02350	R	SM_b21650_m2	R	-65	-52	GATTTAGTAGATAA	9.3	4.5e-06	-12311	5347
SM_b20047	D	SM_b21650_m2	D	-79	-66	ATTTTAGTAGACTA	12.9	3.5e-07	-14865	6456
SM_b21650	D	SM_b21650_m2	D	-57	-44	AATTTACTAAACGG	14.8	9.0e-08	-16223	7046
SMc04134	D	SM_b21650_m3	D	-76	-53	TTGACTTGTAAATTATTATGACAA	2.8	7.7e-06	-11774	5114
SM_b20947	D	SM_b21650_m3	D	-367	-344	ACGTGTAACAAAAGTTGATCGGGA	3.2	6.0e-06	-12024	5222
SM_b21650	D	SM_b21650_m4	D	-69	-44	AGCCGCGATAAAAATTTACTAAACGG	16.9	4.6e-09	-19197	8337
SMc01403	R	SM_b21650_m5	R	-95	-70	CGGCTTGCTAAAATTTGGCCAAGCGC	5.0	7.1e-06	-11855	5149
SM_b21650	D	SM_b21650_m5	D	-69	-44	AGCCGCGATAAAAATTTACTAAACGG	27.1	9.1e-15	-32331	14041
SM_b21706	R	SM_b21706_m1	R	-300	-279	GCTGAGAAAAGGTTTTCTCACC	21.2	1.2e-10	-22844	9921
SM_b21706	R	SM_b21706_m1	R	-267	-246	AATGAGAAAACCTTTTCTCAAT	23.4	3.3e-12	-26437	11481
SM_b21706	R	SM_b21706_m2	R	-300	-279	GCTGAGAAAAGGTTTTCTCACC	21.3	1.1e-10	-22931	9959
SM_b21706	R	SM_b21706_m2	R	-267	-246	AATGAGAAAACCTTTTCTCAAT	23.5	4.0e-12	-26245	11398
SMc03258	R	SM_b21706_m3	R	-68	-56	AGCTTATCTCACG	10.6	1.7e-06	-13285	5770
SM_b21706	R	SM_b21706_m3	R	-300	-288	AGGTTTTCTCACC	13.7	4.9e-07	-14529	6310
SM_b21706	R	SM_b21706_m3	R	-267	-255	ACCTTTTCTCAAT	14.2	1.5e-07	-15713	6824
SM_b21706	R	SM_b21706_m4	R	-300	-279	GCTGAGAAAAGGTTTTCTCACC	21.4	1.0e-10	-23026	10000
SM_b21706	R	SM_b21706_m4	R	-267	-246	AATGAGAAAACCTTTTCTCAAT	23.4	5.1e-12	-26002	11292
SM_b21706	R	SM_b21706_m5	R	-300	-279	GCTGAGAAAAGGTTTTCTCACC	21.3	1.2e-10	-22844	9921
SM_b21706	R	SM_b21706_m5	R	-267	-246	AATGAGAAAACCTTTTCTCAAT	23.4	3.6e-12	-26350	11444
SMc02162	R	SMa0062_m1	R	-150	-121	AATTATATAACTTTGACGTAAACGTCAACA	6.9	2.0e-06	-13122	5699
SMc04337	D	SMa0062_m1	D	-249	-220	GTGAATGCAAGATTCATGATATTCTTAAGG	4.2	8.2e-06	-11711	5086
SMa0062	D	SMa0062_m1	D	-124	-95	TTGTATGCAAGATTCCGGAAAGCGTCAAGT	29.9	1.5e-16	-36436	15824
SMa0193	R	SMa0062_m1	R	-38	-9	TAGTATTGCTGAAACGGAAAAATGTCAACC	6.9	2.0e-06	-13122	5699
SM_b20457	R	SMa0062_m1	R	-250	-221	TTGTATTAAACACCTACAGTTGTTCCAAGC	4.0	9.1e-06	-11607	5041
SMc02087	R	SMa0062_m2	R	-284	-253	TGCAAGATTGCATGGTTGGCTGCAGGATCGCG	-2.7	7.4e-06	-11814	5131
SMa0062	D	SMa0062_m2	D	-139	-108	ATCCCGTTTGCATTCTTGTATGCAAGATTCCG	36.3	4.2e-18	-40011	17377
SMa0789	D	SMa0062_m2	D	-99	-68	ATCCAGGTTATATACTGGTACGCCATAATACG	-0.5	2.9e-06	-12751	5538
SMa0062	D	SMa0062_m3	D	-80	-57	AGTAGCAAACGGAACCCCGTCAGC	26.2	2.6e-14	-31281	13585
SMa1749	R	SMa0062_m4	R	-128	-99	AGTTGACTCGTATTCTCATTTTATTTGCAA	4.3	8.0e-06	-11736	5097
SMa0062	D	SMa0062_m5	D	-15	-4	GGACTCTCAATT	14.1	4.5e-08	-16917	7347
SMc03780	D	SMa0063_m1	D	-13	-2	GTATAGGTTTGA	10.1	9.2e-06	-11596	5036
SMa0063	D	SMa0063_m1	D	-44	-33	GCACAGGTTAAT	10.9	3.4e-06	-12592	5469
SMc00820	R	SMa0063_m2	R	-21	-8	GAATACCTATAAGA	9.5	4.4e-06	-12334	5357
SMc00679	D	SMa0063_m2	D	-61	-48	GACAACCTATCTGC	11.3	1.2e-06	-13633	5921
SMa0063	D	SMa0063_m2	D	-32	-19	GCAAACCTATCTGA	15.5	2.9e-08	-17356	7538
SMa0407	D	SMa0063_m2	D	-25	-12	TACAACATACCAGA	8.4	9.6e-06	-11554	5018
SMc00831	R	SMa0063_m3	R	-81	-59	GTCCACCTCTATAAAAGGTTTGA	11.4	2.0e-07	-15425	6699
SMc04163	R	SMa0063_m3	R	-42	-20	GAAAAACTGAAAGATAGCTTAAC	4.6	8.1e-06	-11724	5092
SMa0063	D	SMa0063_m3	D	-104	-82	TAGCACCTCCCAAACAGATTTTT	12.5	9.7e-08	-16149	7013
SMa0063	D	SMa0063_m3	D	-32	-10	GCAAACCTATCTGATAGGTTGGA	23.3	3.0e-12	-26532	11523
SMc01182	R	SMa0063_m4	R	-227	-216	CTACAGGTTGTA	10.3	5.7e-06	-12075	5244
SMa0063	D	SMa0063_m4	D	-44	-33	GCACAGGTTAAT	13.0	2.9e-07	-15053	6538
SMc00820	R	SMa0063_m5	R	-23	-10	ATACCTATAAGATT	10.6	1.9e-06	-13174	5721
SMa0063	D	SMa0063_m5	D	-30	-17	AAACCTATCTGATA	17.7	1.2e-09	-20541	8921
SMc02560	R	SMa0065_m1	R	-238	-226	CGATTAATATACT	8.9	8.4e-06	-11687	5076
SM_b21115	R	SMa0065_m1	R	-191	-179	TAAATAATATGCT	8.7	9.8e-06	-11533	5009
SMc00953	R	SMa0065_m2	R	-105	-85	GTTGAGCACTATAGCAGTATG	5.1	4.2e-06	-12380	5377
SMc04194	D	SMa0065_m2	D	-215	-195	ATATACTCCGATACTAATAAT	3.4	9.8e-06	-11533	5009
SMa0065	D	SMa0065_m2	D	-58	-38	ACTGACTTGTATGGGAGTAGG	18.8	8.0e-10	-20946	9097
SMa0222	D	SMa0065_m2	D	-22	-2	CCTGAATTGTATGGTACTGTA	5.8	2.9e-06	-12751	5538
SMa5007	R	SMa0065_m2	R	-23	-3	GTCGACTTCCTTTCACGTCAG	3.5	9.8e-06	-11533	5009
SMa1201	R	SMa0065_m3	R	-129	-116	CAAACATGTATATT	8.1	8.6e-06	-11664	5066
SMc00953	R	SMa0065_m4	R	-105	-91	CACTATAGCAGTATG	6.7	8.9e-06	-11629	5051
SMa0065	D	SMa0065_m4	D	-52	-38	TTGTATGGGAGTAGG	16.9	5.9e-09	-18948	8229
SMa0222	D	SMa0065_m4	D	-16	-2	TTGTATGGTACTGTA	9.2	2.1e-06	-13074	5678
SMa0690	R	SMa0065_m4	R	-340	-326	CAGTAGGTAAGTATT	6.7	8.9e-06	-11629	5051
SMa0065	D	SMa0065_m5	D	-56	-43	TGACTTGTATGGGA	14.8	4.7e-08	-16873	7328
SMa0222	D	SMa0065_m5	D	-20	-7	TGAATTGTATGGTA	14.9	4.2e-08	-16986	7377
SMa0097	R	SMa0097_m1	R	-82	-62	GGTATGTCGTTTCTGCATGGG	16.4	2.8e-09	-19694	8553
SM_b20859	D	SMa0097_m2	D	-379	-350	CCTATCCGATTAAAGGGCAAAAACATGCAG	7.0	6.3e-06	-11975	5201
SMc01195	R	SMa0097_m3	R	-290	-278	AGAAACGTCATCA	11.2	2.1e-06	-13074	5678
SMc00658	R	SMa0097_m4	R	-226	-207	GAAATGTGGTGATTGCATGG	10.3	3.6e-06	-12535	5444
SMa0097	R	SMa0097_m4	R	-81	-62	GGTATGTCGTTTCTGCATGG	18.8	9.6e-12	-25369	11018
SM_b21180	R	SMa0097_m4	R	-38	-19	AAAATGTACTTTATGCATAT	11.3	1.6e-06	-13346	5796
SMc04134	D	SMa0097_m5	D	-147	-118	ACAAATAACTATTTGGTTACAAGTTATGGA	9.5	2.0e-06	-13122	5699
SM_b20859	D	SMa0097_m5	D	-380	-351	TCCTATCCGATTAAAGGGCAAAAACATGCA	8.5	3.8e-06	-12481	5420
SMa0179	R	SMa0179_m1	R	-77	-67	AGTGATGAAGG	11.1	5.7e-06	-12075	5244
SM_b20508	R	SMa0179_m1	R	-92	-82	TATGATGAATG	11.2	4.6e-06	-12289	5337
SM_b20509	D	SMa0179_m1	D	-111	-101	TATGATGAATG	11.2	4.6e-06	-12289	5337
SMa0179	R	SMa0179_m2	R	-15	-3	GCTGAATCCATTT	15.8	5.8e-08	-16663	7237
SMa0179	R	SMa0179_m3	R	-19	-9	TCCATTTCATC	13.1	4.1e-07	-14707	6387
SMa0179	R	SMa0179_m4	R	-104	-89	CAAATCTAACTCATTA	17.3	1.5e-09	-20318	8824
SMa0179	R	SMa0179_m4	R	-20	-5	TGAATCCATTTCATCT	14.0	1.5e-07	-15713	6824
SMa0179	R	SMa0179_m5	R	-98	-80	ACGATACACCAAATCTAAC	18.6	1.1e-09	-20628	8959
SMa0179	R	SMa0179_m5	R	-67	-49	TTAATAATAATGGGCTACA	18.9	5.9e-10	-21251	9229
SMa0190	D	SMa0190_m1	D	-63	-54	TTATACACTT	13.0	3.2e-07	-14955	6495
SMa0190	D	SMa0190_m2	D	-50	-37	CTGGAAGTGCCTAG	17.2	3.6e-09	-19442	8444
SMc02030	R	SMa0190_m3	R	-213	-201	TACCGCCCCACAC	10.5	4.6e-06	-12289	5337
SMa0190	D	SMa0190_m4	D	-70	-54	AAAGCCGTTATACACTT	18.3	1.4e-11	-24992	10854
SMa0831	D	SMa0190_m4	D	-275	-259	GAAGCACTGAAGCACTT	9.0	9.7e-06	-11543	5013
SMc01182	R	SMa0190_m5	R	-140	-119	ATACGCCCTTCCGCACGGAAAT	15.5	3.2e-08	-17258	7495
SMc01456	D	SMa0190_m5	D	-36	-15	ATAGGGTATTATGTCCGGAAAG	7.8	7.3e-06	-11828	5137
SMa0190	D	SMa0190_m5	D	-88	-67	CGACGCACTTCCGGACGGAAAG	17.8	1.2e-09	-20541	8921
SMc01488	R	SMa0222_m1	R	-44	-35	AACCATACAA	9.0	9.5e-06	-11564	5022
SM_b20465	R	SMa0222_m1	R	-57	-48	TACCTTACAA	9.7	5.1e-06	-12186	5292
SMc02172	R	SMa0222_m2	R	-33	-21	TGGTACCGTACGG	10.4	2.6e-06	-12860	5585
SMc04348	R	SMa0222_m2	R	-35	-23	CCGTACGGTACGG	9.5	4.6e-06	-12289	5337
SMc04348	R	SMa0222_m2	R	-30	-18	CAGTACCGTACGG	12.2	6.8e-07	-14201	6167
SMa0222	D	SMa0222_m2	D	-16	-4	TTGTATGGTACTG	14.5	1.1e-07	-16023	6959
SMa0065	D	SMa0222_m3	D	-51	-40	TGTATGGGAGTA	9.8	2.1e-06	-13074	5678
SMa0222	D	SMa0222_m3	D	-15	-4	TGTATGGTACTG	17.8	6.9e-09	-18792	8161
SMa0065	D	SMa0222_m4	D	-57	-40	CTGACTTGTATGGGAGTA	9.3	4.9e-07	-14529	6310
SMa0222	D	SMa0222_m4	D	-21	-4	CTGAATTGTATGGTACTG	25.3	2.7e-12	-26638	11569
SMa0222	D	SMa0222_m5	D	-62	-35	GCCCCTCCCTGTTCATCCGGTTTGCCGG	31.3	8.6e-17	-36992	16066
SMc01456	D	SMa0246_m1	D	-18	-9	AAAGGGAGAA	9.7	9.1e-06	-11607	5041
SM_b20049	D	SMa0246_m1	D	-18	-9	AGAGGGAGGA	9.8	6.7e-06	-11913	5174
SM_b21300	D	SMa0246_m1	D	-17	-8	AGAGGGAGAA	10.0	4.2e-06	-12380	5377
SM_b20608	R	SMa0246_m1	R	-160	-151	AGAGGGAGAA	10.0	4.2e-06	-12380	5377
SMa0246	D	SMa0246_m2	D	-12	-3	GAGAGCAATC	11.9	2.8e-06	-12786	5553
SMc02223	R	SMa0246_m3	R	-144	-131	CAAAGTACGGCATA	10.9	1.9e-06	-13174	5721
SMc01267	D	SMa0246_m4	D	-13	-4	GGGAGAGCAC	11.2	1.9e-06	-13174	5721
SMc04239	D	SMa0246_m4	D	-11	-2	GGGAGAGCTA	11.2	1.9e-06	-13174	5721
SMa0246	D	SMa0246_m4	D	-14	-5	GGGAGAGCAA	12.3	9.4e-07	-13877	6027
SMa0267	D	SMa0267_m1	D	-94	-79	CCTAATCCTATATCAG	15.1	4.3e-08	-16962	7367
SMa0267	D	SMa0267_m1	D	-77	-62	TCATATACGATATTGT	8.4	8.4e-06	-11687	5076
SMa0267	D	SMa0267_m2	D	-94	-79	CCTAATCCTATATCAG	17.1	5.7e-09	-18983	8244
SMa1141	D	SMa0267_m2	D	-99	-84	TCTGTTACAATATCGT	7.8	5.6e-06	-12093	5252
SM_b20896	D	SMa0267_m2	D	-168	-153	TCAAATACAATATCGC	10.9	9.5e-07	-13867	6022
SMc02087	R	SMa0267_m3	R	-80	-62	GAATTTGCTATATGATTTA	12.5	4.0e-07	-14732	6398
SMc04054	D	SMa0267_m3	D	-162	-144	TTAACTTATATTCGATCAC	8.3	7.8e-06	-11761	5108
SMc03820	R	SMa0267_m3	R	-105	-87	TTAAATCCTAACCTATTTA	9.1	4.7e-06	-12268	5328
SMc01195	R	SMa0267_m4	R	-100	-68	CTGCTACACAAGCGGATCACATAAGATAGATTA	-5.1	8.9e-06	-11629	5051
SMc01945	D	SMa0267_m4	D	-164	-132	GCAATTTTATATCGAAAGCGATTAAATCGTGTG	-4.5	7.2e-06	-11841	5143
SMc03820	R	SMa0267_m4	R	-113	-81	GTTTCCTTAAATCCTAACCTATTTAGGATAGAG	0.0	1.3e-06	-13553	5886
SMa0267	D	SMa0267_m4	D	-93	-61	CTAATCCTATATCAGATCATATACGATATTGTA	28.5	4.5e-14	-30732	13347
SMa0267	D	SMa0267_m4	D	-88	-56	CCTATATCAGATCATATACGATATTGTATTTGA	31.3	1.8e-15	-33951	14745
SMa0267	D	SMa0267_m4	D	-83	-51	ATCAGATCATATACGATATTGTATTTGACATGC	-4.6	7.5e-06	-11801	5125
SMa0267	D	SMa0267_m4	D	-76	-44	CATATACGATATTGTATTTGACATGCGATATGT	-0.3	1.5e-06	-13410	5824
SMa0661	D	SMa0267_m4	D	-35	-3	ACGGTCCTATATCCAAAAAAATTGGAGATCGGG	-5.0	8.7e-06	-11652	5060
SMa0753	D	SMa0267_m4	D	-201	-169	ATAATATGGCATACCATAAGACATAATCTTGGG	0.4	1.1e-06	-13720	5959
SMa0267	D	SMa0267_m5	D	-31	-6	AACGTCGTATGTCAATAAGCAGTCGG	25.6	3.8e-13	-28599	12420
SMa0307	R	SMa0307_m1	R	-60	-45	TAATCAAGGAGCAAAT	11.4	1.5e-06	-13410	5824
SMa0772	D	SMa0307_m1	D	-36	-21	CTATCAACCATCAAAG	11.7	9.7e-07	-13846	6013
SMa0307	R	SMa0307_m2	R	-32	-20	GAACTTGCAAGTC	12.1	9.8e-07	-13836	6009
SMc03015	D	SMa0307_m3	D	-287	-265	GCCGGATGCCGTTAATAATCAAT	9.1	8.5e-06	-11675	5071
SMa0307	R	SMa0307_m3	R	-35	-13	TGAGGAGGAACTTGCAAGTCACT	10.5	2.8e-06	-12786	5553
SMa0307	R	SMa0307_m4	R	-39	-20	GAACTTGCAAGTCACTCCGC	23.2	1.4e-11	-24992	10854
SMa0307	R	SMa0307_m5	R	-39	-26	GCAAGTCACTCCGC	16.0	1.7e-08	-17890	7770
SMa0815	R	SMa0319_m1	R	-99	-74	TTCTCGCCCGCTTAATATTAGGAGGT	9.3	8.7e-06	-11652	5060
SMc02584	R	SMa0319_m5	R	-85	-63	CAAGTGCTGCATGTTCCATCCTT	7.6	2.3e-06	-12983	5638
SMc00654	D	SMa0319_m5	D	-224	-202	TCAGTTAACGGCATTCCCTCATG	7.9	2.0e-06	-13122	5699
SMa0319	D	SMa0319_m5	D	-317	-295	CCAGTGAAGCAGGCACGTTCATT	5.9	6.1e-06	-12007	5215
SM_b20203	D	SMa0319_m5	D	-59	-37	GGAGTTTGTAAAATTTATTCATT	5.7	6.8e-06	-11899	5167
SMc00109	R	SMa0347_m1	R	-178	-158	GGAATCGATAGGAATAATATT	12.2	5.8e-07	-14360	6237
SMa0347	D	SMa0347_m1	D	-37	-17	CCAATCGATTGCTGCTATGTT	19.2	5.4e-11	-23642	10268
SMc00785	D	SMa0347_m2	D	-171	-142	TAACTTAGTCAATCATATTTCTCGTATTTC	5.8	8.6e-06	-11664	5066
SMa0347	D	SMa0347_m2	D	-46	-17	TAAATTATTCCAATCGATTGCTGCTATGTT	32.0	2.6e-18	-40491	17585
SMa2263	D	SMa0347_m2	D	-51	-22	GAACTTACTATGATCGACGGTTGGACTTTT	8.9	1.3e-06	-13553	5886
SMc00785	D	SMa0347_m3	D	-172	-143	TTAACTTAGTCAATCATATTTCTCGTATTT	5.7	3.1e-06	-12684	5509
SMc04162	R	SMa0347_m3	R	-30	-1	ATAGCTTATTATAAGCCATAACTTATCATC	4.1	7.1e-06	-11855	5149
SMa0347	D	SMa0347_m3	D	-47	-18	ATAAATTATTCCAATCGATTGCTGCTATGT	33.7	8.3e-19	-41633	18081
SMa0347	D	SMa0347_m4	D	-38	-9	TCCAATCGATTGCTGCTATGTTCTATTATT	27.6	6.5e-14	-30364	13187
SMc00785	D	SMa0347_m5	D	-66	-53	ATTGTTCCAAACTA	8.4	8.4e-06	-11687	5076
SMa0347	D	SMa0347_m5	D	-43	-30	ATTATTCCAATCGA	17.8	4.5e-09	-19219	8347
SMc02229	R	SMa0355	R	-77	-64	GTCGAGCGCGCACC	11.4	2.2e-06	-13027	5658
SMa0355	D	SMa0355	D	-131	-118	GACGAGCGGGCACT	12.7	2.5e-07	-15202	6602
SMc00672	D	SMa0372_m1	D	-32	-19	AGAATCGCAATTTA	10.5	4.1e-06	-12405	5387
SMa0372	R	SMa0372_m1	R	-51	-38	AATATTGCAATTAC	12.2	8.2e-07	-14014	6086
SMa0372	R	SMa0372_m1	R	-28	-15	TAAACTGCAATTCA	10.9	2.9e-06	-12751	5538
SMc00672	D	SMa0372_m3	D	-33	-18	AAGAATCGCAATTTAA	11.7	1.2e-06	-13633	5921
SMa0372	R	SMa0372_m3	R	-52	-37	GAATATTGCAATTACG	9.8	4.0e-06	-12429	5398
SMa0372	R	SMa0372_m3	R	-29	-14	ATAAACTGCAATTCAA	12.6	5.7e-07	-14378	6244
SMa0814	R	SMa0372_m3	R	-37	-22	TGATTTTGCAATTCAA	8.4	9.6e-06	-11554	5018
SM_b20365	R	SMa0372_m3	R	-154	-139	AAATAGTGCAATTCTG	9.2	5.9e-06	-12041	5229
SM_b20366	D	SMa0372_m3	D	-43	-28	AAATAGTGCAATTCTG	9.2	5.9e-06	-12041	5229
SMa0372	R	SMa0372_m4	R	-68	-38	AATATTGCAATTACGAGCGGCGATCAACGGG	14.9	5.1e-08	-16791	7292
SMa0372	R	SMa0372_m4	R	-33	-3	CTCATTGTTTCATAAACTGCAATTCAATCAA	12.9	3.8e-07	-14783	6420
SM_b20683	R	SMa0372_m4	R	-49	-19	TACATTGTTACTCTGGATCGAGTTGAACAAT	8.4	6.6e-06	-11928	5180
SMa0372	R	SMa0372_m5	R	-15	-4	TCATTGTTTCAT	10.1	7.8e-06	-11761	5108
SMa1918	D	SMa0372_m5	D	-279	-268	CTATTATTTCGA	11.5	5.9e-07	-14343	6229
SMc02524	R	SMa0498_m1	R	-172	-161	TCGATCGATAGA	10.8	3.7e-06	-12507	5432
SMa0498	R	SMa0498_m1	R	-28	-17	TCTATCGATAGC	12.6	3.2e-07	-14955	6495
SMa0667	D	SMa0498_m1	D	-164	-153	CCTATCGATATT	10.2	6.1e-06	-12007	5215
SM_b20683	R	SMa0498_m1	R	-22	-11	CCTATCGATACA	10.1	7.1e-06	-11855	5149
SMc00785	D	SMa0498_m2	D	-178	-162	TTAAACTTAACTTAGTC	10.5	4.1e-06	-12405	5387
SMc04194	D	SMa0498_m2	D	-296	-280	ACAAATGTATATTATAA	12.9	3.5e-07	-14865	6456
SM_b20673	R	SMa0498_m2	R	-143	-127	TCAAATACAGTTTAGCG	11.3	2.1e-06	-13074	5678
SM_b20674	D	SMa0498_m2	D	-89	-73	TCAAATACAGTTTAGCG	11.3	2.1e-06	-13074	5678
SMc03046	D	SMa0498_m3	D	-111	-88	TCTTAATCAACTATTAAAATCCCC	8.2	6.3e-06	-11975	5201
SMc00116	R	SMa0498_m3	R	-129	-106	GCATCATCTTATCTTCAAATCGTT	7.9	7.5e-06	-11801	5125
SMc00654	D	SMa0498_m3	D	-181	-158	TTCAGATTTACGTTTTGAATCAGG	7.9	7.5e-06	-11801	5125
SMa0498	R	SMa0498_m3	R	-60	-37	TCCTAATTAGATTTTGATCTCAAG	19.8	1.5e-10	-22620	9824
SMc02560	R	SMa0498_m4	R	-245	-222	AAATCGATTAATATACTGAATTCA	10.4	1.1e-06	-13720	5959
SMc02172	R	SMa0498_m4	R	-237	-214	AATTCAATTTGATTTATTTATTGA	7.3	7.9e-06	-11749	5102
SMa0498	R	SMa0498_m4	R	-24	-1	ATTTGAATAGAATTTTTCTATCGA	7.1	9.5e-06	-11564	5022
SM_b20608	R	SMa0498_m4	R	-37	-14	CTATCGGTTAATTAACTTGATGGT	8.7	3.3e-06	-12622	5481
SMc00109	R	SMa0498_m5	R	-176	-159	GAATCGATAGGAATAATA	9.7	6.5e-06	-11944	5187
SMc04162	R	SMa0498_m5	R	-43	-26	TCATCGTCCACCCCAATT	9.3	8.9e-06	-11629	5051
SMa0498	R	SMa0498_m5	R	-35	-18	CTATCGATAGCTCTAAGT	17.0	3.9e-10	-21665	9409
SMa0520	D	SMa0520_m1	D	-82	-63	TATGCAAGCCGACTTGCGTT	17.0	6.5e-10	-21154	9187
SMa0520	D	SMa0520_m1	D	-52	-33	CTTGCAATTCCGCATGCGGA	10.3	4.3e-06	-12357	5367
SMa0307	R	SMa0520_m2	R	-33	-20	GAACTTGCAAGTCA	10.0	8.2e-06	-11711	5086
SMa0372	R	SMa0520_m2	R	-51	-38	AATATTGCAATTAC	9.9	9.1e-06	-11607	5041
SMa0520	D	SMa0520_m2	D	-55	-42	CATCTTGCAATTCC	10.2	6.8e-06	-11899	5167
SMa0520	D	SMa0520_m3	D	-82	-63	TATGCAAGCCGACTTGCGTT	17.4	5.9e-10	-21251	9229
SMa0520	D	SMa0520_m3	D	-52	-33	CTTGCAATTCCGCATGCGGA	10.4	3.2e-06	-12652	5495
SMa0520	D	SMa0520_m4	D	-83	-63	TTATGCAAGCCGACTTGCGTT	20.6	4.8e-11	-23760	10319
SMc01724	D	SMa0520_m5	D	-33	-23	GTTACGACATC	10.9	3.2e-06	-12652	5495
SM_b20586	R	SMa0748_m1	R	-58	-49	ACAAATATCA	11.0	1.7e-06	-13285	5770
SMc02350	R	SMa0748_m2	R	-69	-55	TTAGTAGATAATAAT	10.5	3.9e-06	-12455	5409
SMa0748	D	SMa0748_m2	D	-32	-18	TCAATTTGTAACAGC	10.4	4.3e-06	-12357	5367
SMa2215	D	SMa0748_m3	D	-142	-124	TAAAATGCCTAAAATATCG	9.5	7.6e-06	-11787	5119
SM_b21299	D	SMa0748_m3	D	-33	-15	CAAAATGCTTTCTTTATAA	10.8	3.2e-06	-12652	5495
SMc04239	D	SMa0748_m4	D	-38	-11	CAAAAGAGGGACATAAGAAAATAATACG	8.5	2.8e-06	-12786	5553
SMc04203	D	SMa0748_m4	D	-188	-161	AAAAACAGCCTTTAAACATGATTATCTC	6.3	9.2e-06	-11596	5036
SMc01488	R	SMa0748_m4	R	-43	-16	CCAAAAAATATGACATACAAACCATACA	6.7	7.5e-06	-11801	5125
SMa0748	D	SMa0748_m4	D	-148	-121	CGAAACCTGAGATTGAAGAGACGATACT	9.9	1.2e-06	-13633	5921
SMa0810	R	SMa0748_m4	R	-180	-153	TAAAATCGAAGTTCTGTCGGAACATATT	7.3	5.4e-06	-12129	5268
SMa2008	R	SMa0748_m4	R	-36	-9	ATAAAACGTAACGTAACGTAACTATACG	11.4	5.1e-07	-14489	6292
SMa2009	D	SMa0748_m4	D	-50	-23	ATAAAACGTAACGTAACGTAACTATACG	11.4	5.1e-07	-14489	6292
SMa2215	D	SMa0748_m4	D	-152	-125	AAAAAACAAGTAAAATGCCTAAAATATC	9.8	1.3e-06	-13553	5886
SM_b21115	R	SMa0748_m4	R	-189	-162	CGAAATACTTTAATGCCTAAATAATATG	7.3	5.8e-06	-12058	5237
SM_b21533	D	SMa0748_m4	D	-113	-86	CAAAACATCACAAATCGCAAATTATGCA	6.9	7.1e-06	-11855	5149
SMa0750	R	SMa0750_m1	R	-64	-48	GATTATGTCAGCTAATC	13.4	1.4e-07	-15782	6854
SMa0751	D	SMa0750_m1	D	-104	-88	GATTATGTCAGCTAATC	13.4	1.4e-07	-15782	6854
SMa0872	D	SMa0750_m1	D	-142	-126	AAGTAGCTGAAACAAAC	7.4	7.7e-06	-11774	5114
SMa0872	D	SMa0750_m1	D	-114	-98	CTTTAGCTGAAGTAAAC	11.8	4.4e-07	-14636	6357
SM_b21535	R	SMa0750_m1	R	-32	-16	CATAAGCTGATCTAATC	10.6	1.0e-06	-13816	6000
SMa0750	R	SMa0750_m2	R	-54	-42	CTTTGAGATTATG	14.9	5.5e-08	-16716	7260
SMa0751	D	SMa0750_m2	D	-110	-98	CTTTGAGATTATG	14.9	5.5e-08	-16716	7260
SMa0872	D	SMa0750_m2	D	-351	-339	CTTTGAGCTTATA	10.2	3.4e-06	-12592	5469
SM_b20522	D	SMa0750_m2	D	-287	-275	GTTTGAGGTTATT	11.7	1.0e-06	-13816	6000
SMc03258	R	SMa0750_m3	R	-73	-52	CTTTAGCTTATCTCACGGAACT	6.2	8.8e-06	-11641	5056
SMa0750	R	SMa0750_m3	R	-64	-43	TTTGAGATTATGTCAGCTAATC	25.2	5.5e-14	-30531	13260
SMa0751	D	SMa0750_m3	D	-109	-88	TTTGAGATTATGTCAGCTAATC	25.2	5.5e-14	-30531	13260
SMa0750	R	SMa0750_m4	R	-130	-115	TGATCTGAATTGAACC	13.9	1.1e-07	-16023	6959
SMa0750	R	SMa0750_m4	R	-75	-60	TAATCCAAGGTGAAAT	15.6	5.5e-09	-19019	8260
SMa0751	D	SMa0750_m4	D	-92	-77	TAATCCAAGGTGAAAT	15.6	5.5e-09	-19019	8260
SMa0751	D	SMa0750_m4	D	-37	-22	TGATCTGAATTGAACC	13.9	1.1e-07	-16023	6959
SMa0750	R	SMa0750_m5	R	-61	-41	GCTTTGAGATTATGTCAGCTA	18.1	1.3e-09	-20461	8886
SMa0751	D	SMa0750_m5	D	-111	-91	GCTTTGAGATTATGTCAGCTA	18.1	1.3e-09	-20461	8886
SMa0753	D	SMa0789_m1	D	-203	-178	AAATAATATGGCATACCATAAGACAT	16.8	2.4e-09	-19848	8620
SMa0789	D	SMa0789_m1	D	-92	-67	TTATATACTGGTACGCCATAATACGG	21.3	6.2e-11	-23504	10208
SMc01226	R	SMa0789_m2	R	-17	-1	ATCGTATTTCGGCGTAT	6.3	7.4e-06	-11814	5131
SMa0753	D	SMa0789_m2	D	-204	-188	TAAATAATATGGCATAC	8.2	2.7e-06	-12822	5569
SM_b21117	R	SMa0789_m2	R	-43	-27	GTCAGCTTATGGCATAT	6.4	7.0e-06	-11870	5155
SMa0789	D	SMa0789_m3	D	-86	-65	ACTGGTACGCCATAATACGGCA	16.2	1.3e-08	-18158	7886
SMc00041	D	SMa0789_m4	D	-63	-49	TCATCCCGGCATCGT	9.9	9.3e-06	-11585	5032
SMa0229	D	SMa0789_m4	D	-161	-147	TGATCGCAGGATCGT	10.0	8.2e-06	-11711	5086
SM_b21464	D	SMa0789_m4	D	-198	-184	CGATCGTGGTATCGC	10.4	4.9e-06	-12226	5310
SMa0814	R	SMa0815_m1	R	-114	-95	CCTGTCTCTTTGCTCACAGG	10.3	6.7e-06	-11913	5174
SMa0815	R	SMa0815_m1	R	-27	-8	TTTGTGAAGGTACAGACAGG	13.7	3.4e-08	-17197	7469
SMa0872	D	SMa0815_m1	D	-198	-179	TTTGTCAGGTCCGCGACAGA	10.3	6.7e-06	-11913	5174
SM_b21300	D	SMa0815_m1	D	-78	-59	CTTGTTAGAAAACTAACATT	11.3	2.7e-06	-12822	5569
SMa0815	R	SMa0815_m2	R	-196	-177	CCCTATTGAACGCCGATCTA	17.4	1.5e-09	-20318	8824
SMc03169	D	SMa0815_m3	D	-204	-193	TCGATGGAGCTT	11.6	1.5e-06	-13410	5824
SMa0815	R	SMa0815_m3	R	-200	-189	CCGATCTAGCTT	11.1	2.4e-06	-12940	5620
SMa0815	R	SMa0815_m4	R	-194	-171	TCGTCCCCCTATTGAACGCCGATC	23.6	1.7e-14	-31706	13770
SM_b20869	D	SMa0815_m4	D	-362	-339	TGGTCGCGGTTGTCGACGACGATC	10.9	1.6e-06	-13346	5796
SMa0849	D	SMa0849_m1	D	-19	-4	CCGAGGAGAATAGATC	17.8	4.2e-10	-21591	9377
SMa0849	D	SMa0849_m2	D	-43	-25	GATGTGGCGCGGGAACATT	21.5	9.0e-12	-25434	11046
SMa1505	D	SMa0849_m2	D	-55	-37	TATGTGGCCATGCAACATT	9.7	2.3e-06	-12983	5638
SMa1169	D	SMa0849_m3	D	-60	-51	GGAGATCCAC	8.9	7.2e-06	-11841	5143
SMa0849	D	SMa0849_m5	D	-31	-15	GAACATTACCTGCCGAG	14.2	1.4e-08	-18084	7854
SMa0822	R	SMa0985_m1	R	-127	-118	GGGGATGATC	10.6	4.0e-06	-12429	5398
SMc03252	R	SMa0985_m2	R	-178	-162	GGAGAACGACGATGCTC	9.6	9.3e-06	-11585	5032
SM_b21079	D	SMa0985_m3	D	-24	-12	AAAGAAAGGGGGT	12.6	4.5e-07	-14614	6347
SM_b21291	R	SMa0985_m3	R	-144	-132	AGAGAAATGGGGA	10.5	2.9e-06	-12751	5538
SM_b20901	R	SMa0985_m4	R	-186	-168	GAAGACAGGGCGCATTCAT	11.9	5.5e-07	-14413	6260
SMc00820	R	SMa1207_m1	R	-42	-23	TGTTTGATGAATATCATTAA	6.9	4.7e-06	-12268	5328
SMa0636	D	SMa1207_m1	D	-308	-289	ATATTGACTCCGGTCAATGC	7.1	4.3e-06	-12357	5367
SMa0661	D	SMa1207_m1	D	-210	-191	TTGTTGATCACAATCAACGA	10.1	9.0e-07	-13921	6046
SMa0667	D	SMa1207_m1	D	-157	-138	ATATTGACCACGATCAATGC	12.3	2.4e-07	-15243	6620
SMa0748	D	SMa1207_m1	D	-332	-313	GAACTGATCTCGATCAACAT	6.3	6.2e-06	-11991	5208
SMa1082	R	SMa1207_m1	R	-83	-64	ACATTGACACGGATCAAGTT	9.1	1.5e-06	-13410	5824
SMa1132	D	SMa1207_m1	D	-161	-142	AACTTGATCTGTATCAAACA	11.1	5.3e-07	-14450	6276
SMa1136	D	SMa1207_m1	D	-155	-136	GCTTTGATGAACATCAATGA	8.7	1.9e-06	-13174	5721
SMa1169	D	SMa1207_m1	D	-52	-33	ACTTTGAGCTTGATCAAGGA	8.4	2.2e-06	-13027	5658
SMa1201	R	SMa1207_m1	R	-82	-63	TCATTGTTCCAGATCAACAA	5.5	9.1e-06	-11607	5041
SMa1207	R	SMa1207_m1	R	-74	-55	AAGTTGATCTTGGTCAAATA	13.4	1.1e-07	-16023	6959
SMa1231	D	SMa1207_m1	D	-84	-65	GTATTGACCGTGATCAATGT	12.9	1.6e-07	-15648	6796
SMa1505	D	SMa1207_m2	D	-147	-135	ATACCAATCAATA	10.0	4.3e-06	-12357	5367
SMc00820	R	SMa1207_m3	R	-42	-22	TTGTTTGATGAATATCATTAA	7.4	4.8e-06	-12247	5319
SMc00678	R	SMa1207_m3	R	-26	-6	GACGGTTATTATAAACAAAGT	6.5	7.6e-06	-11787	5119
SMa0625	D	SMa1207_m3	D	-71	-51	GTTGTTGATCTGGAACAATGG	8.4	2.9e-06	-12751	5538
SMa0636	D	SMa1207_m3	D	-309	-289	TATATTGACTCCGGTCAATGC	6.6	7.2e-06	-11841	5143
SMa0661	D	SMa1207_m3	D	-211	-191	ATTGTTGATCACAATCAACGA	8.7	2.6e-06	-12860	5585
SMa0667	D	SMa1207_m3	D	-158	-138	GATATTGACCACGATCAATGC	12.2	3.1e-07	-14987	6509
SMa1082	R	SMa1207_m3	R	-83	-63	TACATTGACACGGATCAAGTT	8.1	3.6e-06	-12535	5444
SMa1132	D	SMa1207_m3	D	-162	-142	GAACTTGATCTGTATCAAACA	11.0	6.7e-07	-14216	6174
SMa1136	D	SMa1207_m3	D	-156	-136	GGCTTTGATGAACATCAATGA	9.3	1.8e-06	-13228	5745
SMa1169	D	SMa1207_m3	D	-53	-33	CACTTTGAGCTTGATCAAGGA	8.2	3.4e-06	-12592	5469
SMa1207	R	SMa1207_m3	R	-74	-54	TAAGTTGATCTTGGTCAAATA	13.3	1.4e-07	-15782	6854
SMa1231	D	SMa1207_m3	D	-85	-65	AGTATTGACCGTGATCAATGT	11.2	6.0e-07	-14326	6222
SMc00820	R	SMa1207_m4	R	-41	-23	TGTTTGATGAATATCATTA	6.1	7.4e-06	-11814	5131
SMa0625	D	SMa1207_m4	D	-70	-52	TTGTTGATCTGGAACAATG	5.8	8.5e-06	-11675	5071
SMa0636	D	SMa1207_m4	D	-308	-290	ATATTGACTCCGGTCAATG	9.0	1.8e-06	-13228	5745
SMa0661	D	SMa1207_m4	D	-210	-192	TTGTTGATCACAATCAACG	10.1	1.0e-06	-13816	6000
SMa0667	D	SMa1207_m4	D	-157	-139	ATATTGACCACGATCAATG	14.2	7.4e-08	-16419	7131
SMa0748	D	SMa1207_m4	D	-332	-314	GAACTGATCTCGATCAACA	5.5	9.7e-06	-11543	5013
SMa1082	R	SMa1207_m4	R	-82	-64	ACATTGACACGGATCAAGT	8.4	2.4e-06	-12940	5620
SMa1100	D	SMa1207_m4	D	-67	-49	CCTTTGATCAGCGTCAATG	5.7	8.9e-06	-11629	5051
SMa1132	D	SMa1207_m4	D	-161	-143	AACTTGATCTGTATCAAAC	10.6	7.4e-07	-14117	6131
SMa1136	D	SMa1207_m4	D	-155	-137	GCTTTGATGAACATCAATG	8.3	2.5e-06	-12899	5602
SMa1169	D	SMa1207_m4	D	-52	-34	ACTTTGAGCTTGATCAAGG	9.1	1.7e-06	-13285	5770
SMa1201	R	SMa1207_m4	R	-81	-63	TCATTGTTCCAGATCAACA	6.1	7.4e-06	-11814	5131
SMa1207	R	SMa1207_m4	R	-73	-55	AAGTTGATCTTGGTCAAAT	13.0	1.7e-07	-15587	6770
SMa1211	R	SMa1207_m4	R	-83	-65	ACCTTGATCTGCGTCAAGT	6.1	7.4e-06	-11814	5131
SMa1231	D	SMa1207_m4	D	-84	-66	GTATTGACCGTGATCAATG	11.8	3.7e-07	-14810	6432
SMa0661	D	SMa1207_m5	D	-211	-191	ATTGTTGATCACAATCAACGA	8.2	5.2e-06	-12167	5284
SMa0667	D	SMa1207_m5	D	-158	-138	GATATTGACCACGATCAATGC	11.1	9.3e-07	-13888	6032
SMa1082	R	SMa1207_m5	R	-83	-63	TACATTGACACGGATCAAGTT	12.0	5.0e-07	-14509	6301
SMa1132	D	SMa1207_m5	D	-162	-142	GAACTTGATCTGTATCAAACA	12.5	3.5e-07	-14865	6456
SMa1136	D	SMa1207_m5	D	-156	-136	GGCTTTGATGAACATCAATGA	7.5	7.6e-06	-11787	5119
SMa1169	D	SMa1207_m5	D	-53	-33	CACTTTGAGCTTGATCAAGGA	9.5	2.7e-06	-12822	5569
SMa1207	R	SMa1207_m5	R	-74	-54	TAAGTTGATCTTGGTCAAATA	12.2	4.4e-07	-14636	6357
SMa1211	R	SMa1207_m5	R	-84	-64	CACCTTGATCTGCGTCAAGTC	8.8	3.8e-06	-12481	5420
SMa1231	D	SMa1207_m5	D	-85	-65	AGTATTGACCGTGATCAATGT	10.7	1.2e-06	-13633	5921
SMa1299	D	SMa1299_m2	D	-35	-13	ATAGGAAATGATCGTTTCCTATT	25.1	7.6e-13	-27905	12119
SMa1299	D	SMa1299_m3	D	-75	-46	CGATAAGCGAGCGGGTTGACCAAATCAATT	10.9	9.9e-08	-16128	7004
SMa1299	D	SMa1299_m3	D	-37	-8	TAATAGGAAATGATCGTTTCCTATTAGGCC	9.1	2.6e-07	-15163	6585
SMc02589	R	SMa1299_m4	R	-307	-285	TTTGGAAATGGCCCTTTAAAAAC	0.4	5.7e-06	-12075	5244
SMa1299	D	SMa1299_m4	D	-35	-13	ATAGGAAATGATCGTTTCCTATT	26.0	6.8e-13	-28017	12167
SMc02589	R	SMa1299_m5	R	-306	-284	CTTTGGAAATGGCCCTTTAAAAA	-1.7	8.0e-06	-11736	5097
SMa1299	D	SMa1299_m5	D	-36	-14	AATAGGAAATGATCGTTTCCTAT	26.8	2.9e-13	-28869	12538
SMa0831	D	SMa1387_m1	D	-217	-206	CCCGTCCATAAA	9.0	7.9e-06	-11749	5102
SMa1387	D	SMa1387_m1	D	-106	-95	CGCGTCGATAAA	15.3	7.7e-08	-16379	7114
SMc04348	R	SMa1387_m2	R	-129	-99	TAAGGGCAGCCCTGCTCTAAAACCGAGCAAC	1.9	4.0e-06	-12429	5398
SMa1387	D	SMa1387_m2	D	-90	-60	CAAGGGCACGAGTTATGAAAAAACTTACAAC	39.4	3.9e-20	-44691	19409
SMa1387	D	SMa1387_m3	D	-269	-252	CAGCCGAACTGGCGTACC	10.5	3.1e-06	-12684	5509
SMa1387	D	SMa1387_m4	D	-107	-97	CCGCGTCGATA	12.0	6.8e-07	-14201	6167
SMc02589	R	SMa1387_m5	R	-188	-175	GCCCTTGAAAGGCG	9.2	7.4e-06	-11814	5131
SMa1387	D	SMa1387_m5	D	-154	-141	CGCCTTGCAAGGAG	15.0	4.4e-08	-16939	7357
SMc01195	R	SMa1442_m1	R	-326	-308	GGCGTCATAAGATGAATCT	9.6	3.0e-06	-12717	5523
SMa1442	R	SMa1442_m1	R	-32	-14	AAAATCATCATATGACTAC	16.9	5.0e-09	-19114	8301
SMc01195	R	SMa1442_m2	R	-326	-308	GGCGTCATAAGATGAATCT	10.0	2.1e-06	-13074	5678
SMa1442	R	SMa1442_m2	R	-32	-14	AAAATCATCATATGACTAC	17.4	2.8e-09	-19694	8553
SMc01118	D	SMa1442_m3	D	-23	-13	GGGGAGGAGAC	9.6	5.0e-06	-12206	5301
SMa1442	R	SMa1442_m4	R	-62	-47	GCAGACATCTTATGGG	18.9	4.4e-10	-21544	9357
SM_b21117	R	SMa1442_m4	R	-39	-24	CGAGTCAGCTTATGGC	7.7	6.6e-06	-11928	5180
SMc01908	R	SMa1442_m5	R	-23	-7	TTATGAGTTATTATGAG	14.1	5.5e-08	-16716	7260
SMa1797	D	SMa1442_m5	D	-127	-111	AAATGACATCCTATGTT	10.0	5.8e-06	-12058	5237
SMc01184	D	SMa1454_m2	D	-16	-7	CAGAGGAATA	10.2	5.1e-06	-12186	5292
SMa1454	D	SMa1454_m2	D	-88	-79	CAGAGGAAAA	10.8	1.2e-06	-13633	5921
SM_b20586	R	SMa1454_m2	R	-130	-121	CGGAGGAAAA	10.3	4.3e-06	-12357	5367
SMa1454	D	SMa1454_m3	D	-68	-59	CAATGACCGA	11.9	1.7e-06	-13285	5770
SMa0097	R	SMa1454_m4	R	-94	-73	TCTGCATGGGTTGGTGCCAAAA	10.3	4.3e-06	-12357	5367
SMa1454	D	SMa1454_m4	D	-35	-14	TTTGCAATGTTCAATGAGAAGG	13.6	1.3e-07	-15856	6886
SMc00878	D	SMa1454_m5	D	-42	-32	ATGCTCCAGCT	9.9	5.4e-06	-12129	5268
SMa5007	R	SMa1454_m5	R	-214	-204	TTGCTCCAACT	9.8	6.8e-06	-11899	5167
SMa1480	D	SMa1480_m1	D	-94	-80	CGGCAATGCCCAAAA	10.9	3.5e-06	-12563	5456
SMa1480	D	SMa1480_m1	D	-59	-45	TTGCGTCTTGCAAGT	10.8	4.0e-06	-12429	5398
SMc00942	R	SMa1480_m2	R	-221	-201	GCGGCGATGTTAACACAAAAT	11.1	1.5e-06	-13410	5824
SMa5007	R	SMa1480_m2	R	-300	-280	TCGGCAAGCTACTCCAAAAAT	8.8	7.6e-06	-11787	5119
SMa1480	D	SMa1480_m2	D	-98	-78	TCGGCGGCAATGCCCAAAAAA	14.3	9.6e-08	-16159	7018
SMa1480	D	SMa1480_m2	D	-95	-75	GCGGCAATGCCCAAAAAAAAC	16.1	1.0e-08	-18421	8000
SMa1480	D	SMa1480_m2	D	-33	-13	CAGGCTAGCGTCGCACAAAAG	15.8	1.8e-08	-17833	7745
SMc02087	R	SMa1480_m3	R	-258	-244	CCTTCGAGTTGCAAG	8.0	9.8e-06	-11533	5009
SMa1480	D	SMa1480_m3	D	-60	-46	CTTGCGTCTTGCAAG	15.7	6.7e-08	-16519	7174
SMc03794	D	SMa1480_m4	D	-56	-46	CCTCTTGCAAG	12.2	6.8e-07	-14201	6167
SMa0307	R	SMa1480_m4	R	-30	-20	GAACTTGCAAG	9.9	5.6e-06	-12093	5252
SMa1480	D	SMa1480_m4	D	-56	-46	CGTCTTGCAAG	11.9	3.4e-06	-12592	5469
SMa1505	D	SMa1505_m1	D	-155	-141	AAGATTGGATACCAA	18.2	2.1e-09	-19981	8678
SMa1505	D	SMa1505_m1	D	-91	-77	TTGATTGAATACCGA	17.0	1.2e-08	-18238	7921
SMa1505	D	SMa1505_m2	D	-153	-139	GATTGGATACCAATC	17.4	2.9e-09	-19659	8538
SM_b21021	D	SMa1505_m2	D	-47	-33	TATTGGTATTCAAAT	8.4	5.8e-06	-12058	5237
SMa1505	D	SMa1505_m3	D	-154	-138	AGATTGGATACCAATCA	18.3	1.4e-09	-20387	8854
SM_b21021	D	SMa1505_m3	D	-48	-32	TTATTGGTATTCAAATG	6.4	9.2e-06	-11596	5036
SMc02323	D	SMa1505_m4	D	-119	-105	ATGTCAATCAAAAAC	10.7	1.3e-06	-13553	5886
SMc00785	D	SMa1505_m4	D	-166	-152	TAGTCAATCATATTT	9.6	3.3e-06	-12622	5481
SMc00095	R	SMa1505_m4	R	-59	-45	CAATCAATAAAAAAA	15.7	2.8e-08	-17391	7553
SMc00095	R	SMa1505_m4	R	-55	-41	CCATCAATCAATAAA	7.7	9.1e-06	-11607	5041
SMa0097	R	SMa1505_m4	R	-61	-47	CATTCAATCGAAATA	10.0	2.4e-06	-12940	5620
SMa1505	D	SMa1505_m4	D	-143	-129	CAATCAATAAAAATT	14.9	8.5e-08	-16281	7071
SMa1505	D	SMa1505_m5	D	-161	-138	AACCACAAGATTGGATACCAATCA	17.1	2.9e-09	-19659	8538
SMa1505	D	SMa1505_m5	D	-103	-80	TGACAGCTTGATTTGATTGAATAC	12.2	5.6e-07	-14395	6252
SM_b21117	R	SMa1505_m5	R	-49	-26	AGTCAGCTTATGGCATATAAGTTT	8.5	6.3e-06	-11975	5201
SMa1632	D	SMa1632_m1	D	-40	-16	CTCATGAACCGACCCACAAATTAGC	19.6	5.7e-11	-23588	10244
SMa2015	R	SMa1632_m1	R	-47	-23	CGCACGCCGGTTTATCCCACTTATC	13.3	2.0e-07	-15425	6699
SMa1632	D	SMa1632_m2	D	-47	-34	GTTTCTCCTCATGA	17.0	3.6e-09	-19442	8444
SMc02560	R	SMa1632_m3	R	-161	-134	CACCTGATCCGGTTTCCCCGCAATTGGC	7.7	4.1e-06	-12405	5387
SMa1632	D	SMa1632_m3	D	-43	-16	CTCCTCATGAACCGACCCACAAATTAGC	28.1	2.9e-16	-35777	15538
SMa2015	R	SMa1632_m3	R	-47	-20	TATCGCACGCCGGTTTATCCCACTTATC	9.1	1.7e-06	-13285	5770
SMa1632	D	SMa1632_m4	D	-20	-7	TTAGCCCTCGACCA	18.0	1.4e-09	-20387	8854
SM_b20154	R	SMa1632_m4	R	-37	-24	TCAGCCCTCTACCA	11.1	1.7e-06	-13285	5770
SMa1632	D	SMa1632_m5	D	-17	-3	GCCCTCGACCATTGC	19.0	1.9e-09	-20081	8721
SM_b20004	R	SMa1632_m5	R	-23	-9	CCCCTCGATTATTGC	6.5	8.8e-06	-11641	5056
SM_b21574	D	SMa1632_m5	D	-198	-184	CCGCTCGACCTTTCC	6.2	9.7e-06	-11543	5013
SMa5007	R	SMa1688_m1	R	-57	-37	CGATCGCATCGTACTGGGCGT	10.8	2.8e-06	-12786	5553
SMa1688	D	SMa1688_m1	D	-26	-6	CGATCGTCACGAACGGGGCTG	18.6	1.7e-12	-27100	11770
SMc00828	R	SMa1688_m2	R	-208	-195	ATACGACCATATGT	10.2	5.5e-06	-12111	5260
SMc04348	R	SMa1688_m2	R	-214	-201	TTACGAAAATATAA	11.0	2.4e-06	-12940	5620
SMa1688	D	SMa1688_m3	D	-53	-25	AATAGCCAGGGCTCAATATTGGTCATACG	34.1	1.4e-18	-41110	17854
SMa1688	D	SMa1688_m4	D	-75	-58	GCAGCCCGCTTCACCAAA	19.4	3.8e-11	-23993	10420
SMc00256	R	SMa1688_m5	R	-58	-46	TTAGGGCATTATC	8.5	8.3e-06	-11699	5081
SMa0065	D	SMa1688_m5	D	-42	-30	GTAGGCCAATAGC	8.9	6.4e-06	-11959	5194
SMa1688	D	SMa1688_m5	D	-60	-48	AAAGGGCAATAGC	16.4	1.4e-08	-18084	7854
SM_b21345	R	SMa1688_m5	R	-183	-171	AAAGGGCAATGGG	8.4	8.8e-06	-11641	5056
SM_b21346	D	SMa1688_m5	D	-57	-45	AAAGGGCAATGGG	8.4	8.8e-06	-11641	5056
SM_b21484	D	SMa1688_m5	D	-19	-7	GAAGGGCAATATT	9.3	5.1e-06	-12186	5292
SMc00529	R	SMa1749_m2	R	-168	-148	AGCTGACTGGTTTAGTCAAGA	10.0	2.3e-06	-12983	5638
SMc04203	D	SMa1749_m2	D	-173	-153	ACATGATTATCTCAATCAACT	7.7	9.5e-06	-11564	5022
SMa1749	R	SMa1749_m2	R	-119	-99	AGTTGACTCGTATTCTCATTT	17.4	3.0e-09	-19625	8523
SMa0872	D	SMa1749_m3	D	-33	-18	GTCAGCGTATCAACCA	9.6	8.7e-06	-11652	5060
SMc02323	D	SMa1749_m5	D	-71	-60	AAAAACATGATT	9.8	9.4e-06	-11575	5027
SMc01610	D	SMa1749_m5	D	-73	-62	ATAAACTTGACT	10.0	7.7e-06	-11774	5114
SMa1749	R	SMa1749_m5	R	-106	-95	AGTAAGTTGACT	12.4	4.0e-07	-14732	6398
SMa2215	D	SMa1749_m5	D	-200	-189	TTTAAAATGACA	10.0	7.7e-06	-11774	5114
SM_b20608	R	SMa1893_m2	R	-20	-10	TAACCTATCGG	10.7	2.7e-06	-12822	5569
SMa1893	D	SMa1893_m3	D	-18	-7	CAAGCGAGACCG	12.1	6.8e-07	-14201	6167
SMa1893	D	SMa1893_m4	D	-53	-41	CTCGCTTGCCGAG	10.7	8.4e-07	-13990	6076
SMa1893	D	SMa1893_m5	D	-29	-11	TCAACCCAAACCAAGCGAG	15.5	4.0e-09	-19337	8398
SMa1948	D	SMa1948_m1	D	-179	-162	GGGTCCGGAACCGTACGG	17.4	4.1e-10	-21615	9387
SMa1948	D	SMa1948_m2	D	-179	-162	GGGTCCGGAACCGTACGG	16.3	4.7e-09	-19176	8328
SM_b20615	D	SMa1948_m2	D	-290	-273	TCGCCCGGGACCGGACCG	9.5	5.9e-06	-12041	5229
SMc02172	R	SMa1948_m5	R	-34	-25	ACCGTACGGT	13.3	4.3e-07	-14659	6367
SMc04348	R	SMa1948_m5	R	-31	-22	ACCGTACGGT	13.3	4.3e-07	-14659	6367
SMa1948	D	SMa1948_m5	D	-170	-161	ACCGTACGGT	13.3	4.3e-07	-14659	6367
SMa1954	D	SMa1954_m1	D	-62	-51	ATCGGTGAAACT	13.7	3.1e-07	-14987	6509
SMa0179	R	SMa1954_m2	R	-19	-3	GCTGAATCCATTTCATC	8.6	8.5e-06	-11675	5071
SMa1954	D	SMa1954_m2	D	-44	-28	AATGATAGGTTCTCATC	13.6	2.5e-07	-15202	6602
SMa1954	D	SMa1954_m2	D	-23	-7	ACTGAACAGGATTCAGT	14.6	7.4e-08	-16419	7131
SM_b21641	R	SMa1954_m2	R	-126	-110	ACTTAGAGCGTTTCAGT	10.2	2.9e-06	-12751	5538
SMc03169	D	SMa1954_m3	D	-223	-213	TTGAACTGAAC	10.4	5.8e-06	-12058	5237
SMa1954	D	SMa1954_m3	D	-57	-47	TGAAACTGAGC	10.4	5.8e-06	-12058	5237
SMa1954	D	SMa1954_m3	D	-27	-17	TTAAACTGAAC	12.6	9.5e-08	-16169	7022
SMa0661	D	SMa1954_m4	D	-81	-71	TGGCACATCGG	10.5	8.9e-06	-11629	5051
SMa1954	D	SMa1954_m4	D	-68	-58	TGCCACATCGG	10.7	5.6e-06	-12093	5252
SMa1954	D	SMa1954_m5	D	-98	-79	ACCAGTTTGGAGGATGTGCT	22.1	2.3e-11	-24496	10638
SMa1966	R	SMa1966_m1	R	-79	-62	GCGGTATGGGATCGACGG	18.0	2.1e-09	-19981	8678
SM_b20457	R	SMa1966_m1	R	-120	-103	GTGGAATCGAATCGGCGG	7.4	9.4e-06	-11575	5027
SMc03060	R	SMa1966_m4	R	-100	-76	GTATCATCGGGATCGGCTTCAAAAA	8.5	8.9e-07	-13932	6051
SMc00658	R	SMa1966_m4	R	-355	-331	TTATCAACGGTTTAGGCAATTATTA	10.2	3.2e-07	-14955	6495
SMa1966	R	SMa1966_m4	R	-94	-70	GGATCGACGGGATAGTCAACAATGT	22.5	1.7e-11	-24798	10770
SMc03252	R	SMa1966_m5	R	-31	-13	CCTCGATTTTGTTCTGAGC	8.6	7.9e-06	-11749	5102
SMa1966	R	SMa1966_m5	R	-89	-71	GATCGACGGGATAGTCAAC	14.8	6.4e-08	-16564	7194
SMa2008	R	SMa2008_m1	R	-36	-15	CGTAACGTAACGTAACTATACG	22.5	1.3e-11	-25066	10886
SMa2008	R	SMa2008_m1	R	-31	-10	TAAAACGTAACGTAACGTAACT	22.6	1.2e-11	-25146	10921
SMa2008	R	SMa2008_m1	R	-26	-5	AATTATAAAACGTAACGTAACG	19.0	6.2e-10	-21201	9208
SMa2009	D	SMa2008_m1	D	-54	-33	AATTATAAAACGTAACGTAACG	19.0	6.2e-10	-21201	9208
SMa2009	D	SMa2008_m1	D	-49	-28	TAAAACGTAACGTAACGTAACT	22.6	1.2e-11	-25146	10921
SMa2009	D	SMa2008_m1	D	-44	-23	CGTAACGTAACGTAACTATACG	22.5	1.3e-11	-25066	10886
SM_b20673	R	SMa2008_m1	R	-83	-62	CTATTCTAAACGTTTCGACACT	6.5	4.4e-06	-12334	5357
SM_b20674	D	SMa2008_m1	D	-154	-133	CTATTCTAAACGTTTCGACACT	6.5	4.4e-06	-12334	5357
SMa2008	R	SMa2008_m2	R	-36	-15	CGTAACGTAACGTAACTATACG	22.6	1.4e-11	-24992	10854
SMa2008	R	SMa2008_m2	R	-31	-10	TAAAACGTAACGTAACGTAACT	22.6	1.4e-11	-24992	10854
SMa2008	R	SMa2008_m2	R	-26	-5	AATTATAAAACGTAACGTAACG	13.2	6.1e-08	-16612	7215
SMa2009	D	SMa2008_m2	D	-54	-33	AATTATAAAACGTAACGTAACG	13.2	6.1e-08	-16612	7215
SMa2009	D	SMa2008_m2	D	-49	-28	TAAAACGTAACGTAACGTAACT	22.6	1.4e-11	-24992	10854
SMa2009	D	SMa2008_m2	D	-44	-23	CGTAACGTAACGTAACTATACG	22.6	1.4e-11	-24992	10854
SMc04348	R	SMa2008_m3	R	-49	-25	GTACGGTACGGTTCGTGAGGTTTCT	8.0	3.4e-06	-12592	5469
SMc01551	D	SMa2008_m3	D	-204	-180	TAACCTCGTGTTTCGGTGCATAACC	8.1	3.4e-06	-12592	5469
SMc01563	R	SMa2008_m3	R	-125	-101	TGACGTAACGGGATGATATTTAATT	8.6	2.4e-06	-12940	5620
SMc01995	D	SMa2008_m3	D	-38	-14	AAGTGTAACGCTTAGTGTTATATAT	8.1	3.1e-06	-12684	5509
SMa2008	R	SMa2008_m3	R	-36	-12	AAACGTAACGTAACGTAACTATACG	7.9	3.5e-06	-12563	5456
SMa2008	R	SMa2008_m3	R	-31	-7	TTATAAAACGTAACGTAACGTAACT	10.1	8.3e-07	-14002	6081
SMa2009	D	SMa2008_m3	D	-52	-28	TTATAAAACGTAACGTAACGTAACT	10.1	8.3e-07	-14002	6081
SMa2009	D	SMa2008_m3	D	-47	-23	AAACGTAACGTAACGTAACTATACG	7.9	3.5e-06	-12563	5456
SMc02642	D	SMa2008_m4	D	-173	-158	GTTACGTTCTATAATT	11.0	2.2e-06	-13027	5658
SMa2008	R	SMa2008_m4	R	-31	-16	GTAACGTAACGTAACT	12.2	6.6e-07	-14231	6180
SMa2008	R	SMa2008_m4	R	-26	-11	AAAACGTAACGTAACG	9.7	6.8e-06	-11899	5167
SMa2009	D	SMa2008_m4	D	-48	-33	AAAACGTAACGTAACG	9.7	6.8e-06	-11899	5167
SMa2009	D	SMa2008_m4	D	-43	-28	GTAACGTAACGTAACT	12.2	6.6e-07	-14231	6180
SMc02851	D	SMa2008_m5	D	-355	-336	AAACGTTACGCATTTGTAAT	10.4	3.2e-06	-12652	5495
SMc03287	R	SMa2008_m5	R	-280	-261	TAACTAAACTCTAATATAAT	9.5	6.1e-06	-12007	5215
SMa2008	R	SMa2008_m5	R	-36	-17	TAACGTAACGTAACTATACG	22.1	6.7e-14	-30334	13174
SMa2008	R	SMa2008_m5	R	-31	-12	AAACGTAACGTAACGTAACT	10.8	2.1e-06	-13074	5678
SMa2009	D	SMa2008_m5	D	-47	-28	AAACGTAACGTAACGTAACT	10.8	2.1e-06	-13074	5678
SMa2009	D	SMa2008_m5	D	-42	-23	TAACGTAACGTAACTATACG	22.1	6.7e-14	-30334	13174
SM_b21117	R	SMa2008_m5	R	-118	-99	AAACGCAACTTTCCAATAAT	11.3	1.5e-06	-13410	5824
SMc02893	D	SMa2015_m1	D	-101	-83	AAGCTAGCCGCTCGACCGT	9.0	5.5e-06	-12111	5260
SMa1632	D	SMa2015_m1	D	-24	-6	CAAATTAGCCCTCGACCAT	16.6	5.7e-09	-18983	8244
SMa2015	R	SMa2015_m1	R	-284	-266	CAACTACGTCGCTGACCCT	11.5	8.0e-07	-14039	6097
SMa2015	R	SMa2015_m1	R	-143	-125	GTACTTTGACGCCGACCGC	9.8	3.0e-06	-12717	5523
SMa2015	R	SMa2015_m2	R	-274	-262	CGACCAACTACGT	11.5	6.0e-07	-14326	6222
SMa2015	R	SMa2015_m2	R	-130	-118	TTACCGCGTACTT	12.7	7.4e-08	-16419	7131
SMa2015	R	SMa2015_m3	R	-397	-375	TTCACCACCAAAAACGACAAAAT	9.2	4.4e-06	-12334	5357
SMa2015	R	SMa2015_m3	R	-313	-291	GCCACACGCGACGGCGACAAAGC	9.5	3.5e-06	-12563	5456
SMa2015	R	SMa2015_m4	R	-95	-85	TGTGGAGAAAC	13.2	1.5e-07	-15713	6824
SMa2049	D	SMa2049_m2	D	-73	-62	CGTGACCAAATT	11.5	1.4e-06	-13479	5854
SMc03258	R	SMa2049_m4	R	-89	-80	CTCCATTCGG	10.4	4.5e-06	-12311	5347
SMc02323	D	SMa2163_m2	D	-158	-142	GCCATATGATTGGCACC	11.1	1.6e-06	-13346	5796
SMa2163	D	SMa2163_m2	D	-67	-51	GCCATACGCTCGGCATC	18.3	2.7e-10	-22033	9569
SMa2163	D	SMa2163_m3	D	-134	-115	CTCTCACGGACTATTGAACG	23.0	3.9e-12	-26270	11409
SM_b20869	D	SMa2163_m3	D	-256	-237	CGATCACGGACTATCGAATC	8.2	3.8e-06	-12481	5420
SMa2163	D	SMa2163_m5	D	-147	-137	TGCTGCAAGAA	11.1	7.4e-07	-14117	6131
SM_b20914	R	SMa2163_m5	R	-60	-50	CCCTGCTAGAA	10.1	5.6e-06	-12093	5252
SMa2215	D	SMa2215_m1	D	-115	-90	GTTCACATATGCACGAATATTAGGCA	20.4	1.5e-10	-22620	9824
SMa0667	D	SMa2215_m2	D	-127	-106	TTCTGGTGTAATATTAGACTTA	5.9	8.9e-06	-11629	5051
SMa2215	D	SMa2215_m2	D	-109	-88	ATATGCACGAATATTAGGCATA	22.7	1.1e-11	-25233	10959
SM_b21115	R	SMa2215_m2	R	-165	-144	ATATGCCTAAATATTTTGCGAA	8.2	2.4e-06	-12940	5620
SMc03843	R	SMa2215_m3	R	-47	-36	AACACTGATGGC	9.6	8.7e-06	-11652	5060
SMa0667	D	SMa2215_m4	D	-119	-103	TAATATTAGACTTAAGG	13.0	2.7e-07	-15125	6569
SMa2215	D	SMa2215_m4	D	-101	-85	GAATATTAGGCATAACC	16.3	9.5e-09	-18472	8022
SMa2215	D	SMa2215_m5	D	-132	-118	AAAATATCGCCATCT	14.3	1.4e-08	-18084	7854
SMc00270	R	SMa2303_m1	R	-304	-290	TCTCAGGGAGGAGAA	11.4	2.1e-06	-13074	5678
SMa1339	D	SMa2303_m1	D	-22	-8	GCTCTGGGAGGAGGA	10.4	4.9e-06	-12226	5310
SMa1442	R	SMa2303_m1	R	-252	-238	CTTCAAGGAGGAAGC	10.4	4.9e-06	-12226	5310
SMa2303	R	SMa2303_m1	R	-175	-161	TTCCAGGGAGGATTA	12.3	8.2e-07	-14014	6086
SMa2303	R	SMa2303_m1	R	-136	-122	GCCCTGGGAGGAGAC	11.8	1.4e-06	-13479	5854
SMc00109	R	SMa2303_m2	R	-65	-54	CGTCGATCAAGC	10.3	6.5e-06	-11944	5187
SMa2303	R	SMa2303_m2	R	-23	-12	CGCCGATCAACC	10.1	8.0e-06	-11736	5097
SMc03256	R	SMa2303_m5	R	-62	-50	TCGAATGCCTCAC	8.4	8.3e-06	-11699	5081
SMa5007	R	SMa5007_m1	R	-73	-58	GCGTCCCGACAAACAG	14.5	2.4e-09	-19848	8620
SMc00831	R	SMa5007_m2	R	-25	-15	TTGTTTCCAAA	9.9	2.7e-06	-12822	5569
SMc01225	R	SMa5007_m2	R	-63	-53	ATGTTCCCACT	9.6	5.0e-06	-12206	5301
SMa5007	R	SMa5007_m3	R	-181	-162	ACAATATCAGCCGAGTTAAA	9.8	2.4e-06	-12940	5620
SMa1334	R	SMa5030_m1	R	-82	-71	CACTTGCAAAAA	11.0	1.9e-06	-13174	5721
SMa5030	D	SMa5030_m1	D	-15	-4	CACTTGCAAAAA	11.0	1.9e-06	-13174	5721
SM_b20537	R	SMa5030_m1	R	-40	-29	AATTTGCAAGAG	10.4	5.9e-06	-12041	5229
SMc02391	R	SMa5030_m2	R	-206	-194	GTCCTTGAAAAGA	10.0	8.0e-06	-11736	5097
SMc01168	D	SMa5030_m2	D	-83	-71	GTCCTTGCAAAGA	10.6	5.6e-06	-12093	5252
SMa1334	R	SMa5030_m2	R	-82	-70	GCACTTGCAAAAA	12.8	3.9e-07	-14757	6409
SMa1334	R	SMa5030_m2	R	-45	-33	TGCCTTGAAAAGC	10.2	7.3e-06	-11828	5137
SMa5030	D	SMa5030_m2	D	-53	-41	TGCCTTGAAAAGC	10.2	7.3e-06	-11828	5137
SMa5030	D	SMa5030_m2	D	-16	-4	GCACTTGCAAAAA	12.8	3.9e-07	-14757	6409
SMc00270	R	SMa5030_m3	R	-15	-4	GTTCCTCCCCTC	10.1	8.0e-06	-11736	5097
SMc01945	D	SMa5030_m3	D	-22	-11	TCCCCTCCTCGG	11.8	1.1e-06	-13720	5959
SMa1334	R	SMa5030_m3	R	-34	-23	GGCCCTCCTCTG	10.7	4.2e-06	-12380	5377
SMa1334	R	SMa5030_m3	R	-15	-4	TCTCCTCCCCGG	12.8	1.9e-07	-15476	6721
SMa5030	D	SMa5030_m3	D	-82	-71	TCTCCTCCCCGG	12.8	1.9e-07	-15476	6721
SMa5030	D	SMa5030_m3	D	-63	-52	GGCCCTCCTCTG	10.7	4.2e-06	-12380	5377
SMa2215	D	SMa5030_m3	D	-255	-244	TCTCCTCCTCGC	10.2	7.2e-06	-11841	5143
SMa1334	R	SMa5030_m4	R	-82	-64	TTGCCGGCACTTGCAAAAA	19.9	3.7e-11	-24020	10432
SMa5030	D	SMa5030_m4	D	-22	-4	TTGCCGGCACTTGCAAAAA	19.9	3.7e-11	-24020	10432
SM_b20365	R	SMa5030_m4	R	-142	-124	TTGCACGCATTTGCAAAAT	10.7	1.2e-06	-13633	5921
SM_b20366	D	SMa5030_m4	D	-58	-40	TTGCACGCATTTGCAAAAT	10.7	1.2e-06	-13633	5921
SMa0625	D	SMa5030_m5	D	-350	-330	TGTTTGCAATTGCCCTTGGAG	8.0	4.3e-06	-12357	5367
SMa0789	D	SMa5030_m5	D	-222	-202	AATTTGCAAGGTGCGGCCACG	10.4	9.4e-07	-13877	6027
SMa2049	D	SMa5030_m5	D	-114	-94	CATCTGCAATTTCCGGTGAAT	6.9	8.1e-06	-11724	5092
SM_b20365	R	SMa5030_m5	R	-63	-43	TTTTTGCAAGCGCGTGCAAAT	14.2	5.9e-08	-16646	7229
SM_b20366	D	SMa5030_m5	D	-139	-119	TTTTTGCAAGCGCGTGCAAAT	14.2	5.9e-08	-16646	7229
SM_b20455	R	SMa5030_m5	R	-71	-51	TATTGGCAAGCTCGGGCAAGT	7.9	4.5e-06	-12311	5347
SM_b20537	R	SMa5030_m5	R	-49	-29	AATTTGCAAGAGCGAAAAGAG	8.4	3.4e-06	-12592	5469
SMc00095	R	SMc00095_m1	R	-62	-45	CAATCAATAAAAAAATCT	15.4	3.2e-08	-17258	7495
SMc00095	R	SMc00095_m1	R	-58	-41	CCATCAATCAATAAAAAA	18.1	9.8e-10	-20743	9009
SMc00095	R	SMc00095_m1	R	-54	-37	TGATCCATCAATCAATAA	7.5	7.9e-06	-11749	5102
SMa1505	D	SMc00095_m1	D	-143	-126	CAATCAATAAAAATTTGC	10.6	1.4e-06	-13479	5854
SMc00095	R	SMc00095_m2	R	-59	-36	TTGATCCATCAATCAATAAAAAAA	7.0	5.0e-07	-14509	6301
SMc00095	R	SMc00095_m2	R	-55	-32	TTGATTGATCCATCAATCAATAAA	24.3	2.8e-12	-26601	11553
SMc00095	R	SMc00095_m2	R	-51	-28	ATTTTTGATTGATCCATCAATCAA	22.8	1.6e-11	-24858	10796
SMc01450	D	SMc00095_m2	D	-188	-165	ATGGTCTATAGATGCCTCAATAAT	1.3	5.4e-06	-12129	5268
SMc01495	R	SMc00095_m2	R	-152	-129	AAATTTTACCGTTTGATAAAAAAA	1.6	4.9e-06	-12226	5310
SMc01819	R	SMc00095_m2	R	-157	-134	AATGTTTACCAACCGGTCAAATTA	3.3	2.5e-06	-12899	5602
SM_b20455	R	SMc00095_m2	R	-38	-15	TTTCTGTAGCGATTGATAAATATA	-0.2	9.7e-06	-11543	5013
SMc03015	D	SMc00095_m3	D	-264	-238	GCTTTGATTAGCGAATTGGTCGGAAAA	1.0	9.1e-06	-11607	5041
SMc00095	R	SMc00095_m3	R	-55	-29	TTTTTGATTGATCCATCAATCAATAAA	23.9	4.8e-12	-26062	11319
SMc00095	R	SMc00095_m3	R	-51	-25	CTTATTTTTGATTGATCCATCAATCAA	26.1	3.7e-13	-28625	12432
SMc01819	R	SMc00095_m3	R	-157	-131	TGTAATGTTTACCAACCGGTCAAATTA	4.4	2.0e-06	-13122	5699
SMc00095	R	SMc00095_m4	R	-60	-34	GATTGATCCATCAATCAATAAAAAAAT	25.3	8.9e-13	-27748	12051
SMc00095	R	SMc00095_m4	R	-56	-30	TTTTGATTGATCCATCAATCAATAAAA	26.2	2.7e-13	-28940	12569
SMc04203	D	SMc00095_m4	D	-208	-182	TTTGGAGGGGCGTTTCCACGAAAAACA	2.9	2.7e-06	-12822	5569
SMc01630	R	SMc00095_m4	R	-128	-102	TTTTGACTAGGCTATCCGATAATGACG	1.1	5.5e-06	-12111	5260
SMc00095	R	SMc00095_m5	R	-56	-35	ATTGATCCATCAATCAATAAAA	9.0	8.7e-08	-16257	7060
SMc00095	R	SMc00095_m5	R	-52	-31	TTTGATTGATCCATCAATCAAT	23.9	1.0e-11	-25328	11000
SMc00095	R	SMc00095_m5	R	-48	-27	TATTTTTGATTGATCCATCAAT	-0.6	5.0e-06	-12206	5301
SMc00107	R	SMc00107_m2	R	-48	-21	TCACTCCTGACACGACCTTGTCAGTTGG	25.3	1.4e-12	-27295	11854
SM_b20047	D	SMc00107_m2	D	-112	-85	TTGCAACAGACGCGGTACCCTTAGTAGA	-3.6	3.5e-06	-12563	5456
SMc00107	R	SMc00107_m3	R	-50	-21	TCACTCCTGACACGACCTTGTCAGTTGGAG	24.0	3.1e-12	-26500	11509
SMc00107	R	SMc00107_m4	R	-61	-38	TTGTCAGTTGGAGAAAGATATAAC	19.5	3.7e-10	-21718	9432
SMc03140	R	SMc00107_m4	R	-178	-155	TTGTCAGTTGTCTTACAACATTGT	5.0	9.8e-06	-11533	5009
SMc00107	R	SMc00107_m5	R	-50	-37	CTTGTCAGTTGGAG	13.7	2.0e-07	-15425	6699
SMc03140	R	SMc00107_m5	R	-167	-154	GTTGTCAGTTGTCT	11.2	1.4e-06	-13479	5854
SMc03046	D	SMc00109_m1	D	-81	-69	CTTCCTCTAGTTG	11.7	1.4e-06	-13479	5854
SMc03794	D	SMc00109_m1	D	-59	-47	GACCCTCTTGCAA	10.0	6.0e-06	-12024	5222
SMc00109	R	SMc00109_m2	R	-36	-14	AATACTCTAGTCTCTAGAGCTTT	19.9	1.7e-10	-22495	9770
SM_b20537	R	SMc00109_m2	R	-116	-94	GAACCTGCAGGTGCTGGAGGAGA	2.2	2.1e-06	-13074	5678
SMc03046	D	SMc00109_m3	D	-81	-68	CTTCCTCTAGTTGT	7.5	5.3e-06	-12148	5276
SMc00109	R	SMc00109_m3	R	-27	-14	AATACTCTAGTCTC	12.1	3.6e-07	-14837	6444
SMc00109	R	SMc00109_m4	R	-36	-14	AATACTCTAGTCTCTAGAGCTTT	19.0	2.6e-10	-22070	9585
SM_b20537	R	SMc00109_m4	R	-116	-94	GAACCTGCAGGTGCTGGAGGAGA	-1.3	4.7e-06	-12268	5328
SMc00146	D	SMc00146_m1	D	-24	-12	CCATGAACATAAT	9.8	8.3e-06	-11699	5081
SM_b20683	R	SMc00146_m1	R	-51	-39	AGTTGAACAATAT	9.7	9.0e-06	-11618	5046
SMc00146	D	SMc00146_m2	D	-34	-13	TAATGTTCAACCATGAACATAA	20.7	1.1e-10	-22931	9959
SMc04194	D	SMc00146_m2	D	-102	-81	TATTTTTAAAGACTGAATTTTA	5.3	6.8e-06	-11899	5167
SMc03122	R	SMc00146_m2	R	-140	-119	GTCTGGTCAAATTTGAACAGAG	5.9	5.0e-06	-12206	5301
SMc03122	R	SMc00146_m2	R	-33	-12	TTCTGTTCAAAAATGAACAGAT	15.4	1.6e-08	-17951	7796
SM_b20365	R	SMc00146_m2	R	-115	-94	GATTGTTCGATATTGCACGATA	8.6	1.2e-06	-13633	5921
SM_b20366	D	SMc00146_m2	D	-88	-67	GATTGTTCGATATTGCACGATA	8.6	1.2e-06	-13633	5921
SMc00146	D	SMc00146_m3	D	-35	-12	CTAATGTTCAACCATGAACATAAT	20.4	2.0e-10	-22333	9699
SMc03122	R	SMc00146_m3	R	-141	-118	TGTCTGGTCAAATTTGAACAGAGC	2.5	6.8e-06	-11899	5167
SMc03122	R	SMc00146_m3	R	-34	-11	CTTCTGTTCAAAAATGAACAGATG	12.9	4.2e-08	-16986	7377
SM_b20365	R	SMc00146_m3	R	-116	-93	AGATTGTTCGATATTGCACGATAT	8.4	4.6e-07	-14592	6337
SM_b20366	D	SMc00146_m3	D	-89	-66	AGATTGTTCGATATTGCACGATAT	8.4	4.6e-07	-14592	6337
SMa0772	D	SMc00146_m4	D	-57	-44	ATAGTCAACATCGG	11.1	1.6e-06	-13346	5796
SMc00146	D	SMc00146_m5	D	-35	-12	CTAATGTTCAACCATGAACATAAT	20.6	1.6e-10	-22556	9796
SMc03122	R	SMc00146_m5	R	-141	-118	TGTCTGGTCAAATTTGAACAGAGC	2.3	8.7e-06	-11652	5060
SMc03122	R	SMc00146_m5	R	-34	-11	CTTCTGTTCAAAAATGAACAGATG	13.1	4.1e-08	-17010	7387
SM_b20365	R	SMc00146_m5	R	-116	-93	AGATTGTTCGATATTGCACGATAT	9.8	2.6e-07	-15163	6585
SM_b20366	D	SMc00146_m5	D	-89	-66	AGATTGTTCGATATTGCACGATAT	9.8	2.6e-07	-15163	6585
SMc00163	D	SMc00163_m1	D	-31	-21	ATCCATCAAAA	13.1	2.7e-07	-15125	6569
SMc00163	D	SMc00163_m1	D	-20	-10	AGCCATCAGGA	10.5	5.8e-06	-12058	5237
SMc00163	D	SMc00163_m2	D	-69	-58	CGACTATACGGC	13.6	2.3e-07	-15285	6638
SMa2008	R	SMc00163_m2	R	-38	-27	TAACTATACGCC	8.6	6.3e-06	-11975	5201
SMa2009	D	SMc00163_m2	D	-32	-21	TAACTATACGCC	8.6	6.3e-06	-11975	5201
SMc04134	D	SMc00163_m3	D	-194	-182	GTTCCTCCTCCCT	10.4	7.4e-06	-11814	5131
SMc00163	D	SMc00163_m3	D	-98	-86	AGTTCTCCTCCTC	11.4	1.2e-06	-13633	5921
SMc04161	R	SMc00163_m3	R	-17	-5	GGTCCTCCTCCCG	10.7	4.9e-06	-12226	5310
SM_b20203	D	SMc00163_m3	D	-102	-90	ATGTCTCCTCCAC	10.3	8.3e-06	-11699	5081
SM_b20817	R	SMc00163_m3	R	-13	-1	ATGTCTCCTCCCT	10.7	4.9e-06	-12226	5310
SM_b21706	R	SMc00163_m3	R	-237	-225	TCGCCTCCTCCCG	10.4	7.4e-06	-11814	5131
SMc00163	D	SMc00163_m4	D	-36	-22	CAAGAATCCATCAAA	15.6	2.8e-08	-17391	7553
SMc00163	D	SMc00163_m4	D	-25	-11	CAAAAAGCCATCAGG	16.5	1.6e-08	-17951	7796
SMc00163	D	SMc00163_m5	D	-78	-60	ACGATGATCCGACTATACG	14.5	7.7e-08	-16379	7114
SM_b20004	R	SMc00163_m5	R	-31	-13	TCGATTATTGCACCATGTG	7.9	5.9e-06	-12041	5229
SMc00241	R	SMc00241_m1	R	-141	-125	TAGAAAACCCCGCGCGC	17.3	8.5e-10	-20886	9071
SMc02229	R	SMc00241_m2	R	-53	-40	CACGGCAGACCCGC	11.2	2.1e-06	-13074	5678
SMa1948	D	SMc00241_m2	D	-35	-22	CGCGGCACCCCCGG	10.1	6.6e-06	-11928	5180
SMc00800	R	SMc00241_m3	R	-87	-73	CCTAGGGGAGGGGTT	9.4	6.8e-06	-11899	5167
SMc00241	R	SMc00241_m3	R	-154	-140	GCGAGGCGCGGGGTT	16.6	2.5e-09	-19807	8602
SMa0690	R	SMc00241_m3	R	-27	-13	CCCAGGGGCCGGGTC	9.2	8.0e-06	-11736	5097
SMc01118	D	SMc00241_m4	D	-115	-98	GAATCGCAAGTGTGATTC	12.0	1.1e-06	-13720	5959
SMc00241	R	SMc00241_m4	R	-81	-64	AGATCGAATAGACGATTC	14.4	2.6e-08	-17465	7585
SMc00241	R	SMc00241_m4	R	-42	-25	TCATCGTCAGCGTGATTC	10.1	6.8e-06	-11899	5167
SM_b20843	R	SMc00241_m4	R	-116	-99	GAATCCTACATGTGATTT	9.8	8.5e-06	-11675	5071
SMc01228	R	SMc00241_m5	R	-53	-35	GCCCCGCGCATTGGGCGGG	10.0	4.2e-06	-12380	5377
SMc01225	R	SMc00241_m5	R	-92	-74	CCCCCGATCCCGGCGCGCG	9.9	4.5e-06	-12311	5347
SMc00241	R	SMc00241_m5	R	-149	-131	ACCCCGCGCGCGAGGCGCG	17.3	9.2e-10	-20807	9036
SMc01610	D	SMc00241_m5	D	-93	-75	AACCCGCGCGTTGCGCGCT	11.5	1.3e-06	-13553	5886
SMc01975	D	SMc00241_m5	D	-134	-116	TCCCCTCTCCCCGCGCGCG	9.7	5.2e-06	-12167	5284
SMc02340	D	SMc00241_m5	D	-313	-295	AGCCCGACCTCCGGGCGCG	11.1	1.9e-06	-13174	5721
SMc03256	R	SMc00241_m5	R	-98	-80	TTCCCGCACCTGGTGCGGG	8.8	9.8e-06	-11533	5009
SMa2263	D	SMc00241_m5	D	-155	-137	ACCCCCTCCCTTTGGCGCG	9.2	7.5e-06	-11801	5125
SM_b20665	R	SMc00241_m5	R	-242	-224	TCCCCTCTCCCCGCGCGCG	9.7	5.2e-06	-12167	5284
SM_b21706	R	SMc00241_m5	R	-384	-366	AACCCTCTCCCCGCGCGCG	10.7	2.4e-06	-12940	5620
SMc00256	R	SMc00256_m1	R	-40	-29	CAAATCTCAAAC	12.8	8.3e-07	-14002	6081
SMc00256	R	SMc00256_m1	R	-33	-22	GATATGTCAAAT	13.6	8.8e-08	-16246	7056
SMc01592	D	SMc00256_m1	D	-73	-62	AATATGTCAACC	9.7	8.2e-06	-11711	5086
SMa0193	R	SMc00256_m1	R	-38	-27	AAAATGTCAACC	9.7	8.2e-06	-11711	5086
SMc01989	D	SMc00256_m4	D	-98	-76	GGACACAGCCAGTAAGATGTGCG	9.9	6.3e-06	-11975	5201
SMc00256	R	SMc00256_m5	R	-33	-6	GTCAAATTTTATGCGTGATATGTCAAAT	27.4	2.9e-15	-33474	14538
SMc00275	D	SMc00275_m1	D	-20	-9	TCCGCCCCGGAG	8.9	9.0e-06	-11618	5046
SMc00658	R	SMc00275_m1	R	-96	-85	CCCGCGCCGCAG	9.2	3.9e-06	-12455	5409
SMc00275	D	SMc00275_m2	D	-85	-73	TAAACGGCGCGCG	10.4	2.1e-07	-15376	6678
SMc00275	D	SMc00275_m3	D	-81	-55	CGGCGCGCGTGCAGCAATTGACGGATG	17.1	1.1e-10	-22931	9959
SMc00275	D	SMc00275_m3	D	-34	-8	CAGCGCGGCGGAACTCCGCCCCGGAGG	15.2	5.6e-09	-19000	8252
SMc01975	D	SMc00275_m3	D	-124	-98	CCGCGCGCGGGGAGAGGGCTAGGGTGA	10.8	2.6e-06	-12860	5585
SM_b20665	R	SMc00275_m3	R	-260	-234	CCGCGCGCGGGGAGAGGGCTAGGGTGA	10.8	2.6e-06	-12860	5585
SM_b21650	D	SMc00275_m3	D	-36	-10	CAGCGCGGCACGGCAGAAGGACGGATG	9.5	9.4e-06	-11575	5027
SMc00275	D	SMc00275_m4	D	-55	-46	GGCTGCGCAT	10.6	2.9e-06	-12751	5538
SMc00275	D	SMc00275_m5	D	-72	-43	TGCAGCAATTGACGGATGGCTGCGCATCAT	18.2	2.4e-10	-22150	9620
SMc00275	D	SMc00275_m5	D	-69	-40	AGCAATTGACGGATGGCTGCGCATCATCCT	18.0	3.5e-10	-21773	9456
SMc02162	R	SMc00278_m1	R	-149	-120	GAATTATATAACTTTGACGTAAACGTCAAC	2.5	8.9e-06	-11629	5051
SMc00277	R	SMc00278_m1	R	-84	-55	GAAATGTTCACCTATTTTCTGCAGTTCATC	30.6	3.7e-16	-35533	15432
SMc00277	R	SMc00278_m1	R	-66	-37	GTATTCTGCCGCACCGTCGAAATGTTCACC	11.3	8.2e-08	-16317	7086
SMc00278	D	SMc00278_m1	D	-66	-37	GTATTCTGCCGCACCGTCGAAATGTTCACC	11.3	8.2e-08	-16317	7086
SMc00278	D	SMc00278_m1	D	-48	-19	GAAATGTTCACCTATTTTCTGCAGTTCATC	30.6	3.7e-16	-35533	15432
SM_b20047	D	SMc00278_m1	D	-366	-337	CTACTCTCCAAAAACTGCGCAAAATTCACC	5.1	2.6e-06	-12860	5585
SM_b20331	R	SMc00278_m1	R	-57	-28	CAAAGCGTCACCACTCGCGTGCAGCTTACG	3.1	6.7e-06	-11913	5174
SMc03287	R	SMc00278_m2	R	-48	-22	GCAGTCCTATAAAATTTGACGCAAATA	4.4	5.9e-06	-12041	5229
SM_b20276	D	SMc00278_m2	D	-87	-61	ACCATCGAGTATGATTTTCAGAAATCA	4.5	5.3e-06	-12148	5276
SMc02560	R	SMc00278_m3	R	-220	-199	TTAAAAAATGCATATTTTTCTT	9.3	2.1e-06	-13074	5678
SMc00095	R	SMc00278_m3	R	-75	-54	AAAAAATCTGCGCTTTTCTCTT	6.5	9.2e-06	-11596	5036
SMc00277	R	SMc00278_m3	R	-74	-53	TCGAAATGTTCACCTATTTTCT	18.6	8.2e-10	-20922	9086
SMc00278	D	SMc00278_m3	D	-50	-29	TCGAAATGTTCACCTATTTTCT	18.6	8.2e-10	-20922	9086
SMc00654	D	SMc00278_m3	D	-150	-129	TAAAAATATTTAACATTTTCGA	15.6	2.4e-08	-17545	7620
SMc01195	R	SMc00278_m4	R	-389	-374	AGAAAATCGCTGATAT	8.6	3.7e-06	-12507	5432
SMc04348	R	SMc00278_m4	R	-292	-277	AGAAAATCGATGAGCA	8.0	5.4e-06	-12129	5268
SMc02589	R	SMc00278_m5	R	-234	-210	TCTCATCCCCAGAAGCGCCGAAAGC	8.8	2.8e-06	-12786	5553
SMc03060	R	SMc00278_m5	R	-101	-77	TATCATCGGGATCGGCTTCAAAAAA	7.6	5.5e-06	-12111	5260
SMc00277	R	SMc00278_m5	R	-60	-36	TGTATTCTGCCGCACCGTCGAAATG	24.4	1.1e-13	-29838	12959
SMc00278	D	SMc00278_m5	D	-67	-43	TGTATTCTGCCGCACCGTCGAAATG	24.4	1.1e-13	-29838	12959
SMa2015	R	SMc00278_m5	R	-389	-365	CACCTTCGCCTTCACCACCAAAAAC	7.2	7.0e-06	-11870	5155
SMc02647	R	SMc00329	R	-40	-11	ATATATCGACATGTGGTGACCCACGCAAGA	7.9	6.0e-06	-12024	5222
SMc01226	R	SMc00329	R	-279	-250	ATATGGGTAGGGCCGTAGCCGCTTTCAATA	12.2	3.3e-07	-14924	6481
SMc01945	D	SMc00329	D	-127	-98	ATTTATCGTGCGCTCCGTCCGGTGTCAATA	8.7	3.7e-06	-12507	5432
SMc04408	R	SMc00329	R	-68	-39	ATATACTCTCTTTCGCCTCACGGTTCAAGA	12.5	2.6e-07	-15163	6585
SM_b20673	R	SMc00329	R	-158	-129	AAATACAGTTTAGCGAGCAAATCATCAAAA	8.0	5.7e-06	-12075	5244
SM_b20674	D	SMc00329	D	-87	-58	AAATACAGTTTAGCGAGCAAATCATCAAAA	8.0	5.7e-06	-12075	5244
SMc01226	R	SMc00329	R	-282	-268	CCGCTTTCAATAGCC	11.6	1.3e-06	-13553	5886
SMc00329	D	SMc00329	D	-84	-71	ATCTATTGAAAGCC	13.1	3.2e-07	-14955	6495
SMa0815	R	SMc00329	R	-190	-177	CCCTATTGAACGCC	9.2	7.3e-06	-11828	5137
SMa2163	D	SMc00329	D	-126	-113	GACTATTGAACGGT	9.3	6.8e-06	-11899	5167
SMc00329	D	SMc00329	D	-338	-308	CTTTAGTGCAAGTCCGGTCTGATTTGAAGCG	24.3	2.1e-12	-26889	11678
SMa0667	D	SMc00329	D	-122	-92	GTGTAATATTAGACTTAAGGAAATTGAGGTG	4.9	6.9e-06	-11884	5161
SMa0831	D	SMc00329	D	-283	-253	CAGTCGCGGAAGCACTGAAGCACTTGAAGCG	5.0	6.9e-06	-11884	5161
SMc01226	R	SMc00329	R	-279	-248	AGATATGGGTAGGGCCGTAGCCGCTTTCAATA	13.9	8.0e-08	-16341	7097
SMc04408	R	SMc00329	R	-68	-37	GTATATACTCTCTTTCGCCTCACGGTTCAAGA	10.6	1.1e-06	-13720	5959
SMc00800	R	SMc00429_m5	R	-283	-272	GACCGTCCGCGG	10.1	9.7e-06	-11543	5013
SM_b20525	D	SMc00458_m1	D	-385	-367	ACGCGGAAGAGCACGAAAG	9.6	8.4e-06	-11687	5076
SMc00794	R	SMc00458_m2	R	-195	-177	ACCCGACAGGCACGAAAAG	10.4	4.6e-06	-12289	5337
SMc00458	D	SMc00458_m2	D	-29	-11	ACCCGAAGGCAAGGGAAGT	15.1	6.6e-10	-21139	9180
SMc00458	D	SMc00458_m4	D	-29	-11	ACCCGAAGGCAAGGGAAGT	17.0	3.7e-11	-24020	10432
SMc00479	R	SMc00479_m1	R	-101	-90	ATATCCTTCGAC	12.2	4.5e-07	-14614	6347
SMc01592	D	SMc00479_m1	D	-183	-172	ACATCCATCGCA	10.6	4.9e-06	-12226	5310
SMc00479	R	SMc00479_m2	R	-50	-35	GCACGCTCAGCCAATT	16.3	1.2e-09	-20541	8921
SMa1299	D	SMc00479_m3	D	-177	-168	ACCACGTCCA	10.6	2.7e-06	-12822	5569
SMc02113	D	SMc00479_m4	D	-166	-144	TTGCGCGTCTGATAAGACGCGCG	10.3	1.5e-06	-13410	5824
SMc04319	D	SMc00479_m4	D	-106	-84	TAGCGCGTCTGAAAAGACGCGCG	10.3	1.2e-06	-13633	5921
SM_b20859	D	SMc00479_m4	D	-325	-303	TTGCGCGTCTGATAAGACGCGCG	10.3	1.5e-06	-13410	5824
SM_b21641	R	SMc00479_m4	R	-210	-188	CCGCGCGTCCGATGAGACGCGCG	9.2	8.6e-06	-11664	5066
SMc03140	R	SMc00479_m5	R	-70	-58	AGGTCAAGGGACA	10.3	6.2e-06	-11991	5208
SMc01908	R	SMc00490_m2	R	-81	-55	TAGTCACAATTGCCGCATTTGTCGACC	8.5	6.5e-06	-11944	5187
SMc00490	D	SMc00490_m2	D	-103	-77	TTGCATCAATTGCACCCATTGTCATCA	20.7	4.6e-11	-23802	10337
SM_b21222	D	SMc00490_m2	D	-65	-39	TTAAGTCAATTGTCTTGACTTATTTCT	8.5	6.0e-06	-12024	5222
SM_b20896	D	SMc00490_m2	D	-189	-163	TGGAATCAATTGCCATAACTGTCAAAT	9.7	2.6e-06	-12860	5585
SM_b20455	R	SMc00490_m3	R	-62	-34	ATATATCGCTTGACAGGTATTGGCAAGCT	7.1	7.3e-06	-11828	5137
SMc00490	D	SMc00490_m4	D	-44	-34	ATAATTGACAT	10.2	7.6e-06	-11787	5119
SMc00490	D	SMc00490_m4	D	-14	-4	AGAATTGTCAC	11.8	7.1e-07	-14158	6149
SMc01450	D	SMc00490_m4	D	-169	-159	ATAATTGACTC	11.4	1.5e-06	-13410	5824
SMc01106	R	SMc00490_m5	R	-102	-76	TGTGTGCAATGAGTGCAAGCGGCTTGC	5.1	7.9e-06	-11749	5102
SMc02229	R	SMc00654_m1	R	-240	-221	AATAAATCGTTAAAAATCGG	9.8	2.2e-06	-13027	5658
SMc00270	R	SMc00654_m1	R	-108	-89	AACAAGTTGTTAAGCAAAAC	11.2	8.5e-07	-13978	6071
SMc00654	D	SMc00654_m1	D	-150	-131	TAAAAATATTTAACATTTTC	11.2	8.5e-07	-13978	6071
SMc00654	D	SMc00654_m1	D	-108	-89	CAGAATTTGTTAACCATTTG	13.6	1.3e-07	-15856	6886
SM_b20047	D	SMc00654_m1	D	-286	-267	TACAAACGCTTAACAAAAAG	8.6	4.9e-06	-12226	5310
SMc00270	R	SMc00654_m2	R	-108	-91	CAAGTTGTTAAGCAAAAC	9.4	4.7e-06	-12268	5328
SMc00654	D	SMc00654_m2	D	-148	-131	AAAATATTTAACATTTTC	8.8	7.2e-06	-11841	5143
SMc00654	D	SMc00654_m2	D	-106	-89	GAATTTGTTAACCATTTG	17.5	1.4e-09	-20387	8854
SM_b20665	R	SMc00654_m3	R	-42	-33	TAGAATCAGT	9.8	4.1e-06	-12405	5387
SMc00654	D	SMc00654_m4	D	-290	-271	GATTTAAGGCTCCGTAAATG	19.0	8.2e-11	-23224	10086
SM_b20843	R	SMc00654_m4	R	-318	-299	CATTTAACGAGATGTAAATA	14.1	9.7e-08	-16149	7013
SMc00270	R	SMc00654_m5	R	-107	-84	GATCGAACAAGTTGTTAAGCAAAA	3.3	7.0e-06	-11870	5155
SM_b20047	D	SMc00654_m5	D	-291	-268	CATTTTACAAACGCTTAACAAAAA	7.2	9.9e-07	-13826	6004
SM_b20608	R	SMc00654_m5	R	-30	-7	GCTTAACCTATCGGTTAATTAACT	2.8	8.9e-06	-11629	5051
SMc00658	R	SMc00658_m2	R	-365	-353	TTAAATGTGGCAA	10.2	1.8e-06	-13228	5745
SMc00658	R	SMc00658_m2	R	-218	-206	CGAAATGTGGTGA	11.5	7.8e-07	-14064	6108
SMc00864	R	SMc00658_m3	R	-363	-353	AAGCAATTAAA	10.7	7.9e-06	-11749	5102
SMc00658	R	SMc00658_m3	R	-354	-344	AGGCAATTATT	10.7	7.9e-06	-11749	5102
SM_b20375	R	SMc00658_m4	R	-41	-29	GTAAGCACCACAT	10.3	4.6e-06	-12289	5337
SMc00658	R	SMc00658_m5	R	-393	-367	CTAAGGTCACAGCCATATGGTCTTGAG	22.1	1.8e-12	-27043	11745
SMc00658	R	SMc00658_m5	R	-227	-201	CGAAGCGAAATGTGGTGATTGCATGGC	20.8	2.2e-11	-24540	10658
SMc00678	R	SMc00678_m2	R	-54	-33	GCAACCGGCGAAATGCCGGATG	8.2	2.4e-06	-12940	5620
SMc00678	R	SMc00678_m3	R	-54	-33	GCAACCGGCGAAATGCCGGATG	8.5	1.9e-06	-13174	5721
SMa0753	D	SMc00678_m3	D	-264	-243	CGGCACAACACCTTGCCGGAAA	6.2	5.7e-06	-12075	5244
SMc00678	R	SMc00678_m4	R	-55	-33	GCAACCGGCGAAATGCCGGATGC	10.6	2.1e-07	-15376	6678
SMc00679	D	SMc00679_m1	D	-112	-97	CTTTTGCACGATTCTG	12.7	4.0e-07	-14732	6398
SMa0229	D	SMc00679_m1	D	-161	-146	TGATCGCAGGATCGTA	9.5	3.7e-06	-12507	5432
SMc00679	D	SMc00679_m2	D	-121	-111	CCTGCAAAACT	10.8	2.0e-06	-13122	5699
SMa0661	D	SMc00679_m2	D	-254	-244	TGTGCAAAAAG	10.3	6.8e-06	-11899	5167
SMa0822	R	SMc00679_m2	R	-137	-127	CGTGCAAAAGT	11.2	1.1e-06	-13720	5959
SMa1334	R	SMc00679_m2	R	-83	-73	CTTGCAAAAAT	10.7	2.8e-06	-12786	5553
SMa5030	D	SMc00679_m2	D	-13	-3	CTTGCAAAAAT	10.7	2.8e-06	-12786	5553
SMc00679	D	SMc00679_m3	D	-121	-92	CCTGCAAAACTTTTGCACGATTCTGCGAGA	21.1	6.4e-11	-23472	10194
SM_b20901	R	SMc00679_m3	R	-136	-107	CATGCATTAGCGTTAGCGGGTCCCTCGAAG	4.8	3.0e-06	-12717	5523
SMc02087	R	SMc00679_m4	R	-289	-274	GCAGGATCGCGAAAAC	11.1	1.3e-06	-13553	5886
SMa0822	R	SMc00679_m4	R	-135	-120	GGATGATCGTGCAAAA	10.8	1.8e-06	-13228	5745
SM_b20203	D	SMc00679_m4	D	-77	-62	GAAGGATGGCGCAAAA	8.6	7.0e-06	-11870	5155
SMc00679	D	SMc00679_m5	D	-126	-103	GCGATCCTGCAAAACTTTTGCACG	22.2	4.4e-12	-26149	11357
SMc00679	D	SMc00679_m5	D	-105	-82	ACGATTCTGCGAGAATCGTGGAAG	12.8	1.9e-07	-15476	6721
SMa0822	R	SMc00679_m5	R	-145	-122	ATGATCGTGCAAAAGTCGTGCCAG	12.9	1.8e-07	-15530	6745
SMc03060	R	SMc00766_m1	R	-43	-29	AATATCTTTTTCATT	6.9	8.2e-06	-11711	5086
SMc00766	D	SMc00766_m1	D	-18	-4	CATATGTTTTTCAGC	16.8	1.2e-08	-18238	7921
SMc01226	R	SMc00766_m2	R	-252	-239	AGCTGAAAAAGATA	9.0	7.7e-06	-11774	5114
SMc00766	D	SMc00766_m3	D	-39	-9	TTTACATACAGCCGATTTCCCCATATGTTTT	20.2	1.9e-10	-22384	9721
SMc01226	R	SMc00766_m4	R	-254	-239	AGCTGAAAAAGATATG	11.4	5.3e-07	-14450	6276
SMc00785	D	SMc00785_m1	D	-72	-56	TTTGGAATTGTTCCAAA	17.8	9.2e-10	-20807	9036
SMc00529	R	SMc00785_m1	R	-133	-117	TTTTGAACGGTTCTAAA	11.7	8.7e-07	-13955	6060
SMc00785	D	SMc00785_m2	D	-65	-54	TTGTTCCAAACT	11.2	3.1e-06	-12684	5509
SMc01229	R	SMc00785_m2	R	-122	-111	CGATTCCAAAAA	9.9	7.1e-06	-11855	5149
SMc00529	R	SMc00785_m2	R	-135	-124	CGGTTCTAAAGT	11.0	3.4e-06	-12592	5469
SMc02350	R	SMc00785_m4	R	-69	-46	TGAATAGATTTAGTAGATAATAAT	11.6	1.2e-06	-13633	5921
SMa1918	D	SMc00785_m4	D	-295	-272	TAAAAATGTGAAAATACTATTATT	12.5	4.4e-07	-14636	6357
SM_b21650	D	SMc00785_m4	D	-61	-38	TAAAAATTTACTAAACGGAGTACT	9.3	9.6e-06	-11554	5018
SMc00785	D	SMc00785_m5	D	-66	-54	ATTGTTCCAAACT	12.5	2.9e-07	-15053	6538
SM_b20255	R	SMc00794_m1	R	-83	-72	AAAGTTCCGCGC	11.5	8.8e-07	-13943	6056
SMc02647	R	SMc00794_m2	R	-50	-40	AGAAAGGTTGC	10.4	7.2e-06	-11841	5143
SMc01199	R	SMc00794_m2	R	-104	-94	CAAAAAGTTCT	10.3	7.2e-06	-11841	5143
SM_b20154	R	SMc00794_m2	R	-62	-52	CGAAAAGTTCC	11.8	1.8e-06	-13228	5745
SMc00280	D	SMc00794_m4	D	-221	-196	TCAACTTTTTGGAATCGATCACGTTC	7.0	8.3e-06	-11699	5081
SM_b20522	D	SMc00794_m4	D	-68	-43	GGAACAAGTTGCCTGACGCCCCGTTA	8.4	3.8e-06	-12481	5420
SMc02391	R	SMc00794_m5	R	-152	-129	TTACGCGTACGTAAAGGTAAATAT	9.8	5.1e-06	-12186	5292
SMc01229	R	SMc00794_m5	R	-125	-102	GAACGTGATCGATTCCAAAAAGTG	10.1	3.7e-06	-12507	5432
SMc01495	R	SMc00794_m5	R	-152	-129	AAATTTTACCGTTTGATAAAAAAA	9.3	6.9e-06	-11884	5161
SMc00820	R	SMc00820_m1	R	-64	-43	AAACATTCGTTGGACTGATCAA	23.4	2.2e-13	-29145	12658
SM_b20276	D	SMc00820_m1	D	-45	-24	AAACATTCGTTGCAATGGTCAT	11.7	5.2e-07	-14469	6284
SM_b21535	R	SMc00820_m1	R	-34	-13	AATCATAAGCTGATCTAATCAA	13.0	2.1e-07	-15376	6678
SM_b21579	D	SMc00820_m2	D	-17	-7	GAAAAGGAGAA	11.1	1.6e-06	-13346	5796
SMc00095	R	SMc00820_m3	R	-54	-44	TCAATCAATAA	9.9	4.2e-06	-12380	5377
SMc00095	R	SMc00820_m3	R	-50	-40	TCCATCAATCA	10.3	2.0e-06	-13122	5699
SMa1505	D	SMc00820_m3	D	-144	-134	CCAATCAATAA	9.7	5.6e-06	-12093	5252
SM_b21102	R	SMc00820_m3	R	-86	-76	ACCATCCATAA	9.8	4.4e-06	-12334	5357
SM_b20484	D	SMc00820_m5	D	-181	-159	TAGTCATTGCACCATCGATTGTG	4.3	9.5e-06	-11564	5022
SMc00831	R	SMc00831_m1	R	-26	-11	ATCATTGTTTCCAAAG	16.4	1.1e-09	-20628	8959
SMc01229	R	SMc00831_m1	R	-121	-106	GTGATCGATTCCAAAA	10.2	4.6e-06	-12289	5337
SMc00785	D	SMc00831_m2	D	-70	-55	TGGAATTGTTCCAAAC	11.8	8.0e-07	-14039	6097
SMc00831	R	SMc00831_m2	R	-26	-11	ATCATTGTTTCCAAAG	13.4	2.0e-07	-15425	6699
SMc03046	D	SMc00831_m3	D	-165	-154	TTAGTGGTAAGG	8.7	4.8e-06	-12247	5319
SMc00831	R	SMc00831_m3	R	-166	-155	TTAGTGGTAAGC	10.0	2.9e-06	-12751	5538
SMc00831	R	SMc00831_m4	R	-179	-155	TTAGTGGTAAGCAAAAAATACCACT	14.6	5.3e-08	-16753	7276
SMa5007	R	SMc00831_m5	R	-373	-357	AATTTGGAAACAAGCGT	11.2	1.7e-06	-13285	5770
SMc00877	D	SMc00877_m2	D	-28	-14	GCACAGGGTTTTGCG	18.1	1.3e-09	-20461	8886
SMc03890	R	SMc00877_m2	R	-132	-118	CCTCAGCGTTTTGGG	8.9	4.7e-06	-12268	5328
SMc00877	D	SMc00877_m3	D	-149	-135	CCGGCCGGACCTAGA	16.5	3.8e-09	-19388	8420
SMc00877	D	SMc00877_m4	D	-33	-22	GAAATGCACAGG	14.9	1.3e-07	-15856	6886
SMc00877	D	SMc00877_m5	D	-153	-139	GACGCCGGCCGGACC	13.5	1.9e-08	-17779	7721
SMa0625	D	SMc00877_m5	D	-213	-199	GTCGCCGGGGGGACT	10.3	5.5e-06	-12111	5260
SMc00878	D	SMc00878_m1	D	-41	-25	TGCTCCAGCTGGAGCGC	17.0	4.8e-10	-21457	9319
SMa1132	D	SMc00878_m1	D	-41	-25	CTCTCAAGATCGAGCAC	9.6	7.9e-06	-11749	5102
SMc00878	D	SMc00878_m2	D	-160	-143	TTCGACTGGACGAAAAGG	11.8	1.0e-06	-13816	6000
SM_b20484	D	SMc00878_m2	D	-168	-151	ATCGATTGTGCAAAAAAG	10.0	8.4e-06	-11687	5076
SMc00831	R	SMc00878_m5	R	-69	-55	GTCCGTCCACCTCTA	12.0	5.1e-08	-16791	7292
SMc00785	D	SMc00879_m1	D	-82	-63	TTTTCCACTTTTTGGAATTG	8.6	6.6e-07	-14231	6180
SMc00879	D	SMc00879_m1	D	-93	-74	TGTTCCAGTATCCGGAACTG	12.4	6.7e-08	-16519	7174
SMc00879	D	SMc00879_m1	D	-73	-54	TGTTTTATTAAATGGAATTA	7.3	1.3e-06	-13553	5886
SMa0347	D	SMc00879_m1	D	-20	-1	TGTTCTATTATTTGCCGCAT	6.4	2.0e-06	-13122	5699
SMc01195	R	SMc00879_m2	R	-108	-95	AGATTATGGAACTA	11.0	1.6e-06	-13346	5796
SMa0773	D	SMc00879_m2	D	-57	-44	GGATACTGGAATAA	11.4	1.2e-06	-13633	5921
SMc00879	D	SMc00879_m3	D	-35	-26	CCTGTCAAGA	11.4	4.2e-06	-12380	5377
SM_b20608	R	SMc00879_m3	R	-67	-58	TCTGTCAAGA	11.6	3.2e-06	-12652	5495
SMc00785	D	SMc00879_m4	D	-83	-62	CTTTTCCACTTTTTGGAATTGT	11.2	3.0e-07	-15019	6523
SMc00879	D	SMc00879_m4	D	-94	-73	TTGTTCCAGTATCCGGAACTGT	16.8	6.2e-09	-18899	8208
SMc00879	D	SMc00879_m4	D	-74	-53	GTGTTTTATTAAATGGAATTAT	6.8	3.3e-06	-12622	5481
SMa0372	R	SMc00879_m4	R	-28	-7	TTGTTTCATAAACTGCAATTCA	5.1	7.3e-06	-11828	5137
SMa1480	D	SMc00879_m4	D	-153	-132	CTGTTCCGCTCACCGAAACTAT	6.1	4.6e-06	-12289	5337
SMc01195	R	SMc00879_m5	R	-108	-95	AGATTATGGAACTA	9.8	1.9e-06	-13174	5721
SMa0773	D	SMc00879_m5	D	-57	-44	GGATACTGGAATAA	12.5	3.2e-07	-14955	6495
SM_b21533	D	SMc00879_m5	D	-23	-10	AAATATTGCAACAT	7.5	7.2e-06	-11841	5143
SMc00929	R	SMc00929_m1	R	-60	-50	CAATACCATCA	13.1	1.4e-07	-15782	6854
SMc00886	D	SMc00929_m1	D	-36	-26	CAATACCATCA	13.1	1.4e-07	-15782	6854
SMa0753	D	SMc00929_m2	D	-208	-181	CAGCTAAATAATATGGCATACCATAAGA	12.5	9.9e-08	-16128	7004
SMc00929	R	SMc00929_m3	R	-75	-53	TACCATCATTGCAAATGATGGGA	23.8	4.7e-13	-28386	12328
SMc00886	D	SMc00929_m3	D	-33	-11	TACCATCATTGCAAATGATGGGA	23.8	4.7e-13	-28386	12328
SMa0753	D	SMc00929_m3	D	-190	-168	TACCATAAGACATAATCTTGGGA	9.3	2.1e-06	-13074	5678
SMc00929	R	SMc00929_m4	R	-78	-65	AAATGATGGGAGAT	15.7	2.5e-09	-19807	8602
SMc00886	D	SMc00929_m4	D	-21	-8	AAATGATGGGAGAT	15.7	2.5e-09	-19807	8602
SMc00280	D	SMc00929_m4	D	-197	-184	TCATGTTTTGAGGT	9.7	7.7e-06	-11774	5114
SMc00929	R	SMc00929_m5	R	-79	-68	TGATGGGAGATT	12.6	1.5e-07	-15713	6824
SMc00886	D	SMc00929_m5	D	-18	-7	TGATGGGAGATT	12.6	1.5e-07	-15713	6824
SMc00953	R	SMc00953_m1	R	-81	-60	CTTGGCATGAAAAGGCAAGAAA	17.0	2.3e-10	-22193	9638
SMc03015	D	SMc00953_m2	D	-93	-82	GTGGCAAGAATA	11.1	1.4e-07	-15782	6854
SMc00953	R	SMc00953_m2	R	-82	-71	AAGGCAAGAAAT	9.7	6.7e-06	-11913	5174
SMa0520	D	SMc00953_m2	D	-122	-111	CAGGCGAGAAAT	9.6	7.6e-06	-11787	5119
SM_b21021	D	SMc00953_m2	D	-95	-84	CTGGGAAGAATA	9.5	8.7e-06	-11652	5060
SMc00953	R	SMc00953_m3	R	-79	-63	GGCATGAAAAGGCAAGA	14.9	3.6e-09	-19442	8444
SMc00953	R	SMc00953_m4	R	-78	-57	AAACTTGGCATGAAAAGGCAAG	17.6	1.7e-09	-20193	8770
SMc00953	R	SMc00953_m5	R	-172	-163	TTCGCCAATT	10.2	4.7e-06	-12268	5328
SMc00280	D	SMc00953_m5	D	-112	-103	GTCGCCAATT	9.6	8.1e-06	-11724	5092
SMc03287	R	SMc00953_m5	R	-258	-249	TTCGCCAATT	10.2	4.7e-06	-12268	5328
SMa0667	D	SMc00953_m5	D	-277	-268	TACGCCAATC	10.2	4.7e-06	-12268	5328
SMa1082	R	SMc00953_m5	R	-91	-82	TTCGCCAAGT	9.8	6.6e-06	-11928	5180
SMc00994	D	SMc00994_m2	D	-28	-2	GTCGAGTTCTTTCGTGAGTGGGCCATA	7.2	1.1e-06	-13720	5959
SMa1442	R	SMc00994_m2	R	-206	-180	GCCCAATGTTCGAGAGAGTTGGCCCGC	4.1	4.5e-06	-12311	5347
SMc00994	D	SMc00994_m3	D	-31	-2	TTGGTCGAGTTCTTTCGTGAGTGGGCCATA	17.9	8.1e-10	-20934	9092
SMc00994	D	SMc00994_m4	D	-31	-2	TTGGTCGAGTTCTTTCGTGAGTGGGCCATA	16.7	1.8e-09	-20135	8745
SMc00994	D	SMc00994_m5	D	-19	-1	TTTCGTGAGTGGGCCATAT	15.4	1.9e-08	-17779	7721
SMc01092	D	SMc01092_m1	D	-57	-31	ACACTATTCGGTATTTCGAACAATTCG	22.2	2.6e-11	-24373	10585
SMa0625	D	SMc01092_m1	D	-76	-50	CCACGGTTGTTGATCTGGAACAATGGT	3.2	4.9e-06	-12226	5310
SMa1201	R	SMc01092_m1	R	-89	-63	TCATTGTTCCAGATCAACAACCGTTGG	3.7	4.0e-06	-12429	5398
SMc01092	D	SMc01092_m2	D	-99	-71	ATATCATTGTCTTTCGTCTGGAATAGTCC	21.7	3.6e-11	-24048	10444
SMc01092	D	SMc01092_m3	D	-57	-31	ACACTATTCGGTATTTCGAACAATTCG	22.4	2.1e-11	-24586	10678
SMa0625	D	SMc01092_m3	D	-76	-50	CCACGGTTGTTGATCTGGAACAATGGT	3.3	5.2e-06	-12167	5284
SMa1201	R	SMc01092_m3	R	-89	-63	TCATTGTTCCAGATCAACAACCGTTGG	3.4	4.8e-06	-12247	5319
SMc01092	D	SMc01092_m4	D	-47	-34	GTATTTCGAACAAT	14.6	1.5e-08	-18015	7824
SMc00678	R	SMc01092_m4	R	-24	-11	TTATTATAAACAAA	9.8	8.8e-06	-11641	5056
SMa1918	D	SMc01092_m4	D	-207	-194	TAATTTGGAACAAA	10.4	5.8e-06	-12058	5237
SM_b21299	D	SMc01092_m4	D	-57	-44	ATATTTCTCACAGA	9.7	9.5e-06	-11564	5022
SMc01092	D	SMc01092_m5	D	-83	-68	TCTGGAATAGTCCGCG	11.2	1.0e-06	-13816	6000
SMc00109	R	SMc01092_m5	R	-24	-9	TTTCGAATACTCTAGT	8.4	5.4e-06	-12129	5268
SMc02391	R	SMc01168_m1	R	-263	-252	ATTTTCGTAAAA	10.2	4.8e-06	-12247	5319
SMc02391	R	SMc01168_m4	R	-312	-293	CTGCAATGCTTAACGAAAAC	8.7	5.6e-06	-12093	5252
SMa0407	D	SMc01225_m1	D	-171	-161	CTGGGGACAGA	10.3	5.7e-06	-12075	5244
SMc01225	R	SMc01225_m2	R	-94	-75	CCCCGATCCCGGCGCGCGCC	14.0	6.7e-09	-18821	8174
SMc01225	R	SMc01225_m2	R	-92	-73	GCCCCCGATCCCGGCGCGCG	10.3	4.5e-06	-12311	5347
SMc00241	R	SMc01225_m2	R	-151	-132	CCCCGCGCGCGAGGCGCGGG	10.5	3.5e-06	-12563	5456
SMc01610	D	SMc01225_m2	D	-133	-114	GGCCGGCATGGCCGCGCGCC	10.6	3.1e-06	-12684	5509
SMc01975	D	SMc01225_m2	D	-135	-116	GTCCCCTCTCCCCGCGCGCG	10.9	2.1e-06	-13074	5678
SMc02340	D	SMc01225_m2	D	-312	-293	GCCCGACCTCCGGGCGCGCG	12.6	1.4e-07	-15782	6854
SM_b20665	R	SMc01225_m2	R	-242	-223	GTCCCCTCTCCCCGCGCGCG	10.9	2.1e-06	-13074	5678
SMc01225	R	SMc01225_m4	R	-91	-81	TCCCGGCGCGC	9.9	4.8e-06	-12247	5319
SMc02560	R	SMc01226_m1	R	-238	-207	TGCATATTTTTCTTTAAATCGATTAATATACT	6.9	2.1e-06	-13074	5678
SMc02851	D	SMc01226_m1	D	-316	-285	TCCTTGAAATGCCACATTTCAATCCACAAATC	4.0	8.6e-06	-11664	5066
SMc01226	R	SMc01226_m1	R	-62	-31	TATATATATCGCTAAAATTCGATACTGGAAGT	21.3	5.8e-11	-23571	10237
SMc01226	R	SMc01226_m1	R	-40	-9	TCGGCGTATTCAGTTTTCTCGATATATATATC	9.0	6.8e-07	-14201	6167
SMc01592	D	SMc01226_m1	D	-144	-113	TCTGCGTATCGCCGAGGCGCGATATGCGTAAA	7.5	1.5e-06	-13410	5824
SMc00654	D	SMc01226_m1	D	-150	-119	TAAAAATATTTAACATTTTCGATACACCTTGC	6.6	2.6e-06	-12860	5585
SMc01226	R	SMc01226_m2	R	-43	-26	CTCGATATATATATCGCT	18.3	2.2e-11	-24540	10658
SM_b20455	R	SMc01226_m2	R	-43	-26	ATTGATAAATATATCGCT	12.3	6.3e-07	-14278	6201
SMc02560	R	SMc01226_m3	R	-236	-207	TGCATATTTTTCTTTAAATCGATTAATATA	8.5	9.3e-07	-13888	6032
SMc01226	R	SMc01226_m3	R	-60	-31	TATATATATCGCTAAAATTCGATACTGGAA	21.4	5.8e-11	-23571	10237
SMc01226	R	SMc01226_m3	R	-38	-9	TCGGCGTATTCAGTTTTCTCGATATATATA	7.6	1.6e-06	-13346	5796
SMc01592	D	SMc01226_m3	D	-144	-115	TCTGCGTATCGCCGAGGCGCGATATGCGTA	9.7	4.9e-07	-14529	6310
SMc00654	D	SMc01226_m3	D	-150	-121	TAAAAATATTTAACATTTTCGATACACCTT	5.7	3.9e-06	-12455	5409
SMc01226	R	SMc01226_m4	R	-43	-26	CTCGATATATATATCGCT	18.5	1.4e-11	-24992	10854
SM_b20455	R	SMc01226_m4	R	-43	-26	ATTGATAAATATATCGCT	12.7	4.4e-07	-14636	6357
SMc01403	R	SMc01403_m2	R	-82	-60	TTGGCGCAAACGGCTTGCTAAAA	11.8	1.0e-06	-13816	6000
SMc00679	D	SMc01403_m2	D	-123	-101	ATCCTGCAAAACTTTTGCACGAT	9.8	7.1e-06	-11855	5149
SMc01403	R	SMc01403_m3	R	-144	-131	ATAATCTAGCAATG	11.3	2.1e-06	-13074	5678
SM_b20047	D	SMc01403_m3	D	-356	-343	AAAACTGCGCAAAA	10.7	3.8e-06	-12481	5420
SMc01403	R	SMc01403_m4	R	-71	-42	TTTTCGGAACATTCGGATTTGGCGCAAACG	9.2	7.9e-06	-11749	5102
SMc01406	R	SMc01403_m4	R	-64	-35	ATTGCATGGACGCGGGATAGCGCGCAAGAT	9.3	7.3e-06	-11828	5137
SMa1480	D	SMc01403_m4	D	-163	-134	TGTGCTTTTTCTGTTCCGCTCACCGAAACT	9.2	7.9e-06	-11749	5102
SMc00490	D	SMc01403_m5	D	-34	-16	TGAAATGTCGCGCAATATA	10.1	5.2e-06	-12167	5284
SMc01403	R	SMc01403_m5	R	-72	-54	TCGGATTTGGCGCAAACGG	14.3	5.0e-08	-16811	7301
SMc03287	R	SMc01403_m5	R	-49	-31	TAAAATTTGACGCAAATAC	9.4	9.2e-06	-11596	5036
SM_b20047	D	SMc01403_m5	D	-359	-341	CCAAAAACTGCGCAAAATT	11.1	2.3e-06	-12983	5638
SMc00949	D	SMc01406_m1	D	-161	-139	AGGTTCTGTCCATGCAAGATGAA	9.4	6.6e-06	-11928	5180
SMc03843	R	SMc01406_m1	R	-28	-6	GTCAGATAAGCATACACTTATCT	9.2	8.4e-06	-11687	5076
SM_b20683	R	SMc01406_m1	R	-29	-7	TAGCCCTATCGATACATTGTTAC	10.7	2.3e-06	-12983	5638
SMa1948	D	SMc01406_m2	D	-204	-185	AGTCAATACTGCGCCCAAGG	10.9	1.3e-06	-13553	5886
SMc01488	R	SMc01406_m3	R	-63	-52	AAATTGTATGCA	11.1	2.7e-06	-12822	5569
SMc01406	R	SMc01406_m3	R	-33	-22	GCAATGTATGGA	12.0	6.3e-07	-14278	6201
SMa0222	D	SMc01406_m3	D	-19	-8	GAATTGTATGGT	10.6	4.7e-06	-12268	5328
SMc03210	R	SMc01406_m4	R	-81	-65	ATACAAGCACCATGCAT	9.9	6.5e-06	-11944	5187
SMc01495	R	SMc01495_m1	R	-188	-175	ATCCTGAGAAAACA	10.3	6.3e-06	-11975	5201
SMc01495	R	SMc01495_m1	R	-58	-45	GCGCTGTCAAACGG	11.0	2.9e-06	-12751	5538
SMc01495	R	SMc01495_m2	R	-37	-23	ATTTGCTGCCACTAT	14.7	4.3e-08	-16962	7367
SMa5007	R	SMc01495_m2	R	-216	-202	AGTTGCTCCAACTCG	10.2	4.4e-06	-12334	5357
SMc01495	R	SMc01495_m3	R	-153	-134	TTACCGTTTGATAAAAAAAT	14.1	8.6e-08	-16269	7066
SMa1505	D	SMc01495_m3	D	-147	-128	ATACCAATCAATAAAAATTT	12.3	7.1e-07	-14158	6149
SMc01495	R	SMc01495_m4	R	-59	-45	GCGCTGTCAAACGGG	15.3	8.8e-09	-18549	8056
SMc02980	R	SMc01495_m4	R	-180	-166	AGGCTGTCAAACGCG	12.5	6.3e-07	-14278	6201
SM_b20673	R	SMc01495_m4	R	-93	-79	ACACTGTCAAGCGGG	9.8	6.5e-06	-11944	5187
SM_b20674	D	SMc01495_m4	D	-137	-123	ACACTGTCAAGCGGG	9.8	6.5e-06	-11944	5187
SMc00938	D	SMc01495_m5	D	-71	-42	TGCAGCCTTGCCTTGACTTGGTGTGCCAAA	5.7	6.3e-06	-11975	5201
SMc01495	R	SMc01495_m5	R	-55	-26	TGCTGCCACTATTTTCCATGCGCTGTCAAA	31.7	1.8e-18	-40859	17745
SMa0773	D	SMc01495_m5	D	-54	-25	TACTGGAATAAGATCAGATGGGCTGTCAGA	11.2	2.3e-07	-15285	6638
SMc03046	D	SMc01563_m3	D	-113	-91	ATTCTTAATCAACTATTAAAATC	9.8	8.1e-07	-14026	6092
SMc01563	R	SMc01563_m3	R	-138	-116	ATATTTAATTCCTGATTAACCAC	17.2	5.2e-09	-19075	8284
SMc01592	D	SMc01592_m1	D	-60	-47	AACTGACATATATT	13.7	1.7e-07	-15587	6770
SMc01651	D	SMc01592_m2	D	-71	-45	AAATGCGTCAGCCCTGCTGCCGTTCAC	3.4	3.8e-06	-12481	5420
SMc01592	D	SMc01592_m2	D	-74	-48	AAATATGTCAACCAAACTGACATATAT	27.8	4.5e-14	-30732	13347
SMa0773	D	SMc01592_m2	D	-48	-22	AATAAGATCAGATGGGCTGTCAGATCT	3.1	4.6e-06	-12289	5337
SM_b21222	D	SMc01592_m2	D	-67	-41	TATTAAGTCAATTGTCTTGACTTATTT	16.2	2.6e-09	-19768	8585
SMc01651	D	SMc01592_m3	D	-71	-45	AAATGCGTCAGCCCTGCTGCCGTTCAC	3.5	2.5e-06	-12899	5602
SMc01592	D	SMc01592_m3	D	-74	-48	AAATATGTCAACCAAACTGACATATAT	27.9	4.8e-14	-30668	13319
SMa0773	D	SMc01592_m3	D	-48	-22	AATAAGATCAGATGGGCTGTCAGATCT	2.8	3.3e-06	-12622	5481
SM_b21222	D	SMc01592_m3	D	-67	-41	TATTAAGTCAATTGTCTTGACTTATTT	15.9	2.7e-09	-19730	8569
SMc01651	D	SMc01592_m4	D	-71	-45	AAATGCGTCAGCCCTGCTGCCGTTCAC	1.4	3.6e-06	-12535	5444
SMc01592	D	SMc01592_m4	D	-74	-48	AAATATGTCAACCAAACTGACATATAT	28.3	4.0e-14	-30850	13398
SM_b21222	D	SMc01592_m4	D	-67	-41	TATTAAGTCAATTGTCTTGACTTATTT	15.3	2.8e-09	-19694	8553
SMc01592	D	SMc01592_m5	D	-77	-62	TGGAAATATGTCAACC	11.5	9.4e-07	-13877	6027
SMa0193	R	SMc01592_m5	R	-38	-23	CGGAAAAATGTCAACC	8.0	9.7e-06	-11543	5013
SMa0750	R	SMc01592_m5	R	-60	-45	TGAGATTATGTCAGCT	9.3	4.6e-06	-12289	5337
SMa0751	D	SMc01592_m5	D	-107	-92	TGAGATTATGTCAGCT	9.3	4.6e-06	-12289	5337
SMa1456	R	SMc01592_m5	R	-51	-36	AAAATATATGTCAGTC	11.6	8.8e-07	-13943	6056
SM_b21598	D	SMc01592_m5	D	-164	-149	CCGAAACATGTCAATA	11.0	1.5e-06	-13410	5824
SM_b21464	D	SMc01592_m5	D	-172	-157	ACCAGTTATGTCAATT	11.1	1.3e-06	-13553	5886
SMc02323	D	SMc01610_m1	D	-73	-60	GGAAAAACATGATT	9.1	9.6e-06	-11554	5018
SMc04203	D	SMc01610_m1	D	-179	-166	CTTTAAACATGATT	9.8	6.0e-06	-12024	5222
SMc01610	D	SMc01610_m1	D	-75	-62	TAATAAACTTGACT	15.8	6.2e-10	-21201	9208
SMa0773	D	SMc01610_m1	D	-236	-223	GTTAAAACTTGAAT	9.8	6.0e-06	-12024	5222
SMc00864	R	SMc01610_m2	R	-74	-65	GTGAAAACGA	10.1	7.7e-06	-11774	5114
SMc00241	R	SMc01610_m2	R	-134	-125	TAGAAAACCC	10.6	1.8e-06	-13228	5745
SMc01610	D	SMc01610_m2	D	-98	-89	TTGAAAACCC	10.0	9.7e-06	-11543	5013
SMc01610	D	SMc01610_m3	D	-72	-48	TAAACTTGACTTAAATGAGAAGGAT	28.2	3.4e-16	-35618	15469
SMa0372	R	SMc01610_m3	R	-39	-15	TAAACTGCAATTCAATCAAAAGGAA	12.0	2.7e-07	-15125	6569
SM_b20817	R	SMc01610_m3	R	-90	-66	ATATCATGACTGCATTGAGAAGCAT	9.4	1.7e-06	-13285	5770
SM_b20818	D	SMc01610_m3	D	-144	-120	ATATCATGACTGCATTGAGAAGCAT	9.4	1.7e-06	-13285	5770
SMc01610	D	SMc01610_m4	D	-15	-3	GGAGAAAGCGACG	13.3	1.9e-07	-15476	6721
SMa0407	D	SMc01610_m4	D	-349	-337	GGAGACGACGAGA	10.4	5.1e-06	-12186	5292
SM_b20608	R	SMc01610_m4	R	-304	-292	CGAGATGACGAGG	10.8	3.6e-06	-12535	5444
SMc01610	D	SMc01610_m5	D	-75	-62	TAATAAACTTGACT	16.1	6.2e-10	-21201	9208
SMa0773	D	SMc01610_m5	D	-236	-223	GTTAAAACTTGAAT	9.2	9.6e-06	-11554	5018
SMa1797	D	SMc01615_m1	D	-134	-114	AGAAGAAAAATGACATCCTAT	8.1	6.7e-06	-11913	5174
SM_b20367	R	SMc01615_m1	R	-112	-92	AATGCTAACATAACAATAGAT	9.7	2.3e-06	-12983	5638
SMc00831	R	SMc01615_m2	R	-190	-166	CAAAAAATACCACTTTGCTGTGAAT	8.3	2.5e-06	-12899	5602
SMc01615	R	SMc01615_m2	R	-65	-41	GGAAAGGTAACATTCTTATGTTATT	13.3	8.5e-08	-16281	7071
SM_b21021	D	SMc01615_m2	D	-226	-202	TGTAATTCATGAAATTCATGTGATC	8.1	2.9e-06	-12751	5538
SM_b20896	D	SMc01615_m2	D	-130	-106	TATACCACTCTAAAAGAGTGTGATT	6.5	7.7e-06	-11774	5114
SMc02087	R	SMc01615_m3	R	-160	-143	CAACAAACGCATGTTACG	8.6	2.8e-06	-12786	5553
SMc01615	R	SMc01615_m3	R	-65	-48	TAACATTCTTATGTTATT	20.4	8.5e-11	-23188	10071
SMc03101	R	SMc01615_m3	R	-162	-145	TAACATTTGTCTTTTTTT	6.9	7.1e-06	-11855	5149
SM_b20344	R	SMc01615_m3	R	-64	-47	TCACATTATCACATTATT	10.4	8.7e-07	-13955	6060
SMc01615	R	SMc01615_m4	R	-92	-81	GGGATTTTGTTA	10.7	2.2e-06	-13027	5658
SM_b21640	R	SMc01615_m4	R	-124	-113	ATTTTTCTGTGA	9.4	5.9e-06	-12041	5229
SMc04134	D	SMc01615_m5	D	-151	-122	TGCAACAAATAACTATTTGGTTACAAGTTA	8.0	4.0e-06	-12429	5398
SMc01615	R	SMc01615_m5	R	-75	-46	GGTAACATTCTTATGTTATTTTTCAACTCA	29.2	6.1e-18	-39638	17215
SMc02162	R	SMc01630_m1	R	-253	-236	CTGCAGTATAAACCTGCC	6.7	8.1e-06	-11724	5092
SMc04194	D	SMc01630_m1	D	-222	-205	CTAGGGTATATACTCCGA	10.4	1.0e-06	-13816	6000
SMc01630	R	SMc01630_m1	R	-94	-77	TTGGGGTATATACCGGCC	18.5	8.7e-10	-20863	9060
SM_b20231	D	SMc01630_m1	D	-35	-18	GGGGGGTGTTTACCAGCA	9.4	1.8e-06	-13228	5745
SMc01630	R	SMc01630_m2	R	-92	-64	TGAAATACCTCTCTTGGGGTATATACCGG	29.5	7.2e-15	-32565	14143
SMa0789	D	SMc01630_m2	D	-41	-13	GCTTATACCTGATTGGGCGGATTTAGACG	1.9	3.9e-06	-12455	5409
SMc04194	D	SMc01630_m3	D	-224	-205	GGCTAGGGTATATACTCCGA	9.0	1.8e-06	-13228	5745
SMc01630	R	SMc01630_m3	R	-94	-75	TCTTGGGGTATATACCGGCC	19.8	1.8e-10	-22438	9745
SMc01630	R	SMc01630_m3	R	-47	-28	CTCTGGGGTATACTCCTTCC	7.1	5.2e-06	-12167	5284
SM_b20231	D	SMc01630_m3	D	-37	-18	CCGGGGGGTGTTTACCAGCA	7.3	4.7e-06	-12268	5328
SMc01630	R	SMc01630_m4	R	-105	-79	GGGGTATATACCGGCCCGGGCGCTTTT	23.4	7.4e-12	-25630	11131
SMc01630	R	SMc01630_m4	R	-87	-61	GGTTGAAATACCTCTCTTGGGGTATAT	3.4	4.3e-06	-12357	5367
SMa0789	D	SMc01630_m4	D	-44	-18	GGAGCTTATACCTGATTGGGCGGATTT	3.7	3.7e-06	-12507	5432
SM_b20455	R	SMc01630_m4	R	-55	-29	GATAAATATATCGCTTGACAGGTATTG	1.7	9.4e-06	-11575	5027
SMc01630	R	SMc01630_m5	R	-92	-64	TGAAATACCTCTCTTGGGGTATATACCGG	27.8	3.3e-14	-31042	13481
SMc01651	D	SMc01651_m1	D	-20	-8	CACGGTGTTAATT	15.4	1.4e-08	-18084	7854
SMc01651	D	SMc01651_m2	D	-77	-67	ACGACGAAATG	10.9	3.1e-06	-12684	5509
SMc03820	R	SMc01651_m4	R	-63	-54	TGGCAAGCGC	10.4	7.8e-06	-11761	5108
SMa1299	D	SMc01651_m4	D	-202	-193	TGGCAAGCAC	10.4	7.8e-06	-11761	5108
SM_b20615	D	SMc01651_m5	D	-342	-331	CAAGCATGGCGG	9.7	7.0e-06	-11870	5155
SMc01664	D	SMc01664_m1	D	-42	-31	ATTCGATTAGAT	15.6	4.3e-08	-16962	7367
SMc03253	R	SMc01664_m1	R	-337	-326	ATTCGGTTAGAT	10.5	2.9e-06	-12751	5538
SMc01664	D	SMc01664_m2	D	-55	-31	TATTGATCGAAGAATTCGATTAGAT	25.4	1.1e-12	-27536	11959
SMa0498	R	SMc01664_m2	R	-26	-2	TTTGAATAGAATTTTTCTATCGATA	2.3	3.6e-06	-12535	5444
SMc01664	D	SMc01664_m3	D	-57	-44	TTTATTGATCGAAG	13.6	2.8e-08	-17391	7553
SMc01664	D	SMc01664_m4	D	-50	-31	ATCGAAGAATTCGATTAGAT	24.9	1.4e-12	-27295	11854
SMc03253	R	SMc01664_m4	R	-337	-318	TTGGAGAAATTCGGTTAGAT	5.4	5.1e-06	-12186	5292
SMc02172	R	SMc01664_m5	R	-248	-226	TTTATTTATTGACACGGTGGATT	9.3	7.7e-07	-14077	6114
SMc01664	D	SMc01664_m5	D	-57	-35	TTTATTGATCGAAGAATTCGATT	26.7	4.1e-14	-30825	13387
SM_b20441	D	SMc01728	D	-147	-131	TGCCGGGCATTTTTTGT	7.9	8.2e-06	-11711	5086
SMc01728	D	SMc01728	D	-58	-35	CGAATAGATGCCCGAAATTCGGCG	16.2	9.6e-09	-18462	8018
SMc01728	D	SMc01728	D	-20	-10	CTGATGCTACA	10.7	3.0e-06	-12717	5523
SM_b20901	R	SMc01728	R	-277	-253	TTGCGGAAACTCTGACATTTATTTT	-2.6	8.3e-06	-11699	5081
SM_b20586	R	SMc01728	R	-107	-83	CTTGCGAAGAACAGGCGCTTATTCG	-2.2	7.2e-06	-11841	5143
SMa1231	D	SMc01762_m1	D	-232	-221	GTTATCCACCGA	11.8	1.7e-06	-13285	5770
SMc02113	D	SMc01762_m2	D	-217	-201	ATCCGATTAAAGGACAA	9.2	8.5e-06	-11675	5071
SMc00942	R	SMc01762_m2	R	-121	-105	AGCCGGTCTGAGAAAAA	12.0	8.0e-07	-14039	6097
SMc01403	R	SMc01762_m2	R	-109	-93	CGCCGATCAAAGCAAAC	9.8	5.3e-06	-12148	5276
SMc04348	R	SMc01762_m4	R	-283	-263	GATGCCTGAGATAGAGAAAAT	9.9	2.4e-06	-12940	5620
SM_b20859	D	SMc01762_m4	D	-356	-336	CATGCAGCAGATCAAAGTACT	11.8	6.0e-07	-14326	6222
SMc01762	D	SMc01762_m5	D	-76	-63	AAGTCGCTGTAATT	14.2	1.7e-07	-15587	6770
SMc01819	R	SMc01819_m1	R	-157	-144	AACCGGTCAAATTA	12.7	1.7e-07	-15587	6770
SMc01819	R	SMc01819_m3	R	-155	-140	TACCAACCGGTCAAAT	19.4	3.9e-10	-21665	9409
SMa0825	D	SMc01819_m3	D	-164	-149	AACCATCTGGTCAATT	8.5	2.2e-06	-13027	5658
SMc00041	D	SMc01819_m4	D	-159	-148	GACGGGAACAAG	10.9	3.0e-06	-12717	5523
SMc01819	R	SMc01819_m4	R	-235	-224	GACGGGAACATG	12.7	5.1e-07	-14489	6292
SMc01819	R	SMc01819_m5	R	-153	-139	TTACCAACCGGTCAA	16.5	8.5e-09	-18583	8071
SMc01908	R	SMc01908_m1	R	-89	-75	GTCGACCAAAACCAC	18.7	5.0e-10	-21416	9301
SMa1910	D	SMc01908_m1	D	-100	-86	GTCGACGATAACCTT	11.3	1.1e-06	-13720	5959
SMc01908	R	SMc01908_m3	R	-84	-71	ATTTGTCGACCAAA	15.6	3.4e-08	-17197	7469
SMa1387	D	SMc01908_m4	D	-220	-191	CCGACAATGCCCGCGCCTATCACAATGACT	-1.5	5.6e-06	-12093	5252
SM_b20843	R	SMc01908_m4	R	-280	-251	TCGGCAGAACCTTCTATCGCAGCTAAAAAT	-0.3	3.4e-06	-12592	5469
SMc01908	R	SMc01908_m5	R	-42	-32	TGAAATGGCAG	13.1	3.4e-07	-14894	6469
SMc00953	R	SMc01945_m2	R	-199	-176	TACATCGCGTTGGACTTAATCTTT	7.7	4.1e-06	-12405	5387
SMc01945	D	SMc01945_m2	D	-157	-134	TATATCGAAAGCGATTAAATCGTG	16.4	7.4e-09	-18722	8131
SMc01945	D	SMc01945_m2	D	-88	-65	TATATCGCGAACGATTTATTTTAG	12.2	2.1e-07	-15376	6678
SMc03046	D	SMc01945_m3	D	-214	-195	TGTGATCGCAAGCGATTTCA	8.3	8.6e-06	-11664	5066
SMc02113	D	SMc01945_m3	D	-226	-207	TTTAATCGTATCCGATTAAA	16.7	5.9e-09	-18948	8229
SMc01945	D	SMc01945_m3	D	-158	-139	TTATATCGAAAGCGATTAAA	16.6	6.7e-09	-18821	8174
SMc01945	D	SMc01945_m3	D	-143	-124	TTAAATCGTGTGCGATATTT	17.9	1.3e-09	-20461	8886
SMc01945	D	SMc01945_m3	D	-104	-85	GTCAATACCTTGCGATTATA	11.1	1.2e-06	-13633	5921
SMc01945	D	SMc01945_m3	D	-89	-70	TTATATCGCGAACGATTTAT	17.7	1.7e-09	-20193	8770
SMc03820	R	SMc01945_m3	R	-106	-87	TTAAATCCTAACCTATTTAG	10.1	2.5e-06	-12899	5602
SMa2215	D	SMc01945_m3	D	-215	-196	CTATATCTATTGCGATTTAA	9.0	5.4e-06	-12129	5268
SM_b20859	D	SMc01945_m3	D	-385	-366	TTTAATCCTATCCGATTAAA	14.0	1.0e-07	-16118	7000
SMc02113	D	SMc01945_m4	D	-226	-207	TTTAATCGTATCCGATTAAA	16.5	8.2e-09	-18619	8086
SMc01945	D	SMc01945_m4	D	-158	-139	TTATATCGAAAGCGATTAAA	15.3	2.3e-08	-17588	7638
SMc01945	D	SMc01945_m4	D	-143	-124	TTAAATCGTGTGCGATATTT	16.6	7.6e-09	-18695	8119
SMc01945	D	SMc01945_m4	D	-89	-70	TTATATCGCGAACGATTTAT	18.5	1.2e-09	-20541	8921
SMa2215	D	SMc01945_m4	D	-215	-196	CTATATCTATTGCGATTTAA	7.0	5.4e-06	-12129	5268
SM_b20859	D	SMc01945_m4	D	-385	-366	TTTAATCCTATCCGATTAAA	10.3	8.0e-07	-14039	6097
SMc01945	D	SMc01945_m5	D	-163	-140	CAATTTTATATCGAAAGCGATTAA	15.2	1.9e-08	-17779	7721
SMc01945	D	SMc01945_m5	D	-148	-125	AGCGATTAAATCGTGTGCGATATT	19.5	3.7e-10	-21718	9432
SMc01945	D	SMc01945_m5	D	-94	-71	TGCGATTATATCGCGAACGATTTA	22.2	1.5e-11	-24923	10824
SMa0267	D	SMc01945_m5	D	-87	-64	CTATATCAGATCATATACGATATT	7.3	4.4e-06	-12334	5357
SMa1918	D	SMc01945_m5	D	-281	-258	TACTATTATTTCGATGCCATTTTT	5.9	9.0e-06	-11618	5046
SMa2215	D	SMc01945_m5	D	-220	-197	CATTTCTATATCTATTGCGATTTA	8.4	2.2e-06	-13027	5658
SMc04337	D	SMc01975_m1	D	-291	-271	CGAATAGGTCAGAGCTTTTGC	6.8	2.8e-06	-12786	5553
SMc01975	D	SMc01975_m1	D	-40	-20	CTCAGATGTCAGACCAATTCT	20.0	2.5e-10	-22110	9602
SMc03140	R	SMc01975_m1	R	-177	-157	GTCAGTTGTCTTACAACATTG	4.9	6.6e-06	-11928	5180
SM_b20441	D	SMc01975_m1	D	-58	-38	GGAATTGGTATGACCACTTGG	9.2	8.8e-07	-13943	6056
SMc01975	D	SMc01975_m2	D	-73	-64	CCCTTGACCA	10.6	3.8e-06	-12481	5420
SM_b21102	R	SMc01975_m2	R	-79	-70	CCCTTGACCA	10.6	3.8e-06	-12481	5420
SMc04203	D	SMc01975_m3	D	-398	-379	ACAGATGCCAAACCAATCGC	1.0	5.5e-06	-12111	5260
SMc01975	D	SMc01975_m3	D	-39	-20	TCAGATGTCAGACCAATTCT	24.7	2.7e-12	-26638	11569
SMc01975	D	SMc01975_m4	D	-29	-14	GACCAATTCTGGTCTT	16.7	1.8e-09	-20135	8745
SMc02030	R	SMc02030_m1	R	-127	-114	TAGGTGACCACCAG	11.7	1.2e-06	-13633	5921
SMc02030	R	SMc02030_m1	R	-16	-3	GGGGTCAACACCTC	12.5	3.0e-07	-15019	6523
SMc00280	D	SMc02030_m2	D	-268	-253	GCGGGATGAGGAAAAG	11.4	1.9e-06	-13174	5721
SMc01819	R	SMc02030_m2	R	-58	-43	GCGGGCTGCCCAAAAA	10.5	5.1e-06	-12186	5292
SMc02980	R	SMc02030_m2	R	-261	-246	GCGGGATGAGGAAAAG	11.4	1.9e-06	-13174	5721
SMa0355	D	SMc02030_m2	D	-41	-26	CCGGGGAGGGTAAAAC	11.6	1.5e-06	-13410	5824
SMa0355	D	SMc02030_m2	D	-40	-25	CGGGGAGGGTAAAACG	11.3	2.1e-06	-13074	5678
SM_b21372	R	SMc02030_m2	R	-66	-51	GCGGGTTGAGGAAAAG	10.5	5.1e-06	-12186	5292
SMc02030	R	SMc02030_m3	R	-137	-111	CAATAGGTGACCACCAGATCGAGCGTG	23.7	1.5e-12	-27226	11824
SMc02030	R	SMc02030_m4	R	-35	-23	AGCATGTTTCGTC	14.2	2.0e-08	-17728	7699
SM_b21295	R	SMc02030_m4	R	-214	-202	TGCATGGTTCGTT	9.9	7.6e-06	-11787	5119
SMc02406	R	SMc02030_m5	R	-145	-132	ATCACTCATCACTC	10.1	5.5e-06	-12111	5260
SM_b20717	R	SMc02030_m5	R	-145	-132	GACACTACACACAC	11.7	1.2e-06	-13633	5921
SMc02140	D	SMc02140_m2	D	-35	-18	ACGGCTGTCGTGCGTAGG	20.8	1.1e-11	-25233	10959
SM_b20901	R	SMc02140_m3	R	-375	-363	CGGCCGGGCCATT	10.0	5.1e-06	-12186	5292
SMc02140	D	SMc02140_m4	D	-95	-85	GCCTATGCAGA	11.4	3.3e-06	-12622	5481
SMc02140	D	SMc02140_m5	D	-18	-8	GAAGGAGTCCT	10.3	5.6e-06	-12093	5252
SMc02172	R	SMc02172_m1	R	-353	-338	TCCTTGGGAGGATTTA	12.3	6.6e-07	-14231	6180
SMc03122	R	SMc02172_m1	R	-249	-234	CCTTTGGGAGGAGGAC	11.5	1.7e-06	-13285	5770
SMa1339	D	SMc02172_m1	D	-135	-120	ACTACGGGAGGGGTGC	10.6	4.2e-06	-12380	5377
SMa1339	D	SMc02172_m1	D	-22	-7	GCTCTGGGAGGAGGAG	10.5	4.5e-06	-12311	5347
SMa2303	R	SMc02172_m1	R	-137	-122	GCCCTGGGAGGAGACG	12.4	5.8e-07	-14360	6237
SM_b20033	R	SMc02172_m1	R	-298	-283	CGCTTGGGAGGAGCGA	11.2	2.3e-06	-12983	5638
SM_b20162	D	SMc02172_m1	D	-19	-4	ATCTCGGGAGGAGAGC	10.7	3.8e-06	-12481	5420
SM_b20901	R	SMc02172_m1	R	-387	-372	CATTTGGGAGGATAGG	10.7	3.8e-06	-12481	5420
SMc00658	R	SMc02172_m2	R	-358	-342	TTAGGCAATTATTAAAT	6.9	3.2e-06	-12652	5495
SMc02172	R	SMc02172_m3	R	-169	-158	AATCCTCCCGGT	11.2	2.5e-06	-12899	5602
SMc02162	R	SMc02172_m3	R	-306	-295	ATTCCTCCCAAG	11.0	4.0e-06	-12429	5398
SMc02323	D	SMc02172_m3	D	-197	-186	ACTCCTCCCGCT	11.2	2.5e-06	-12899	5602
SMc02374	R	SMc02172_m3	R	-31	-20	ATTCCTCCCGTT	10.5	8.1e-06	-11724	5092
SMc03101	R	SMc02172_m3	R	-127	-116	GCTCCTCCCGAG	11.0	4.0e-06	-12429	5398
SMc02470	D	SMc02172_m3	D	-228	-217	TCTCCTCCCATA	11.4	1.7e-06	-13285	5770
SM_b20365	R	SMc02172_m3	R	-16	-5	GTTCCTCCCAGA	11.0	4.0e-06	-12429	5398
SM_b20366	D	SMc02172_m3	D	-177	-166	GTTCCTCCCAGA	11.0	4.0e-06	-12429	5398
SM_b21345	R	SMc02172_m3	R	-21	-10	TCTCCTCCCGGT	11.4	1.7e-06	-13285	5770
SM_b21346	D	SMc02172_m3	D	-218	-207	TCTCCTCCCGGT	11.4	1.7e-06	-13285	5770
SM_b21598	D	SMc02172_m3	D	-235	-224	TCTCCTCCCACA	10.7	6.5e-06	-11944	5187
SMc02172	R	SMc02172_m4	R	-171	-157	AAATCCTCCCGGTCG	12.3	7.7e-07	-14077	6114
SMc02172	R	SMc02172_m4	R	-23	-9	GTTTCCTCCCATTGG	10.0	7.0e-06	-11870	5155
SMc02162	R	SMc02172_m4	R	-308	-294	AATTCCTCCCAAGCG	12.4	6.8e-07	-14201	6167
SMc02323	D	SMc02172_m4	D	-198	-184	AACTCCTCCCGCTGA	11.1	2.8e-06	-12786	5553
SM_b21345	R	SMc02172_m4	R	-23	-9	CTCTCCTCCCGGTTT	9.7	8.6e-06	-11664	5066
SM_b21346	D	SMc02172_m4	D	-219	-205	CTCTCCTCCCGGTTT	9.7	8.6e-06	-11664	5066
SMc00095	R	SMc02172_m5	R	-60	-44	TCAATCAATAAAAAAAT	9.7	4.4e-07	-14636	6357
SMc00095	R	SMc02172_m5	R	-56	-40	TCCATCAATCAATAAAA	4.0	7.8e-06	-11761	5108
SMc00658	R	SMc02172_m5	R	-358	-342	TTAGGCAATTATTAAAT	8.4	8.9e-07	-13932	6051
SMa1505	D	SMc02172_m5	D	-144	-128	CCAATCAATAAAAATTT	3.6	9.4e-06	-11575	5027
SMc02175	R	SMc02175_m2	R	-73	-59	ATCTTGCAACAGAAA	14.3	2.2e-08	-17632	7658
SMc02175	R	SMc02175_m3	R	-235	-225	AGGAGCCTCGC	10.6	9.7e-06	-11543	5013
SMc02175	R	SMc02175_m4	R	-21	-9	TACCCCTGCGTTC	14.8	6.1e-09	-18915	8215
SMc02223	R	SMc02223_m1	R	-122	-103	GCGAGGAAAATAGTCCTTCC	10.6	1.3e-06	-13553	5886
SMc03251	R	SMc02223_m2	R	-213	-203	ACCTTTACTCG	10.6	4.2e-06	-12380	5377
SM_b20817	R	SMc02223_m3	R	-57	-48	GATAGGAATT	10.5	1.8e-06	-13228	5745
SM_b20818	D	SMc02223_m3	D	-162	-153	GATAGGAATT	10.5	1.8e-06	-13228	5745
SMc02223	R	SMc02223_m4	R	-122	-103	GCGAGGAAAATAGTCCTTCC	11.9	8.0e-07	-14039	6097
SM_b20203	D	SMc02223_m4	D	-30	-11	CATAAGTTAAATTTCCTTAC	13.5	2.2e-07	-15330	6658
SMc02223	R	SMc02223_m5	R	-112	-91	CCGTAAAGCACAGCGAGGAAAA	21.3	5.6e-11	-23606	10252
SM_b21641	R	SMc02223_m5	R	-68	-47	GATTAGAGCACCTCCAGGAAAA	11.0	3.2e-07	-14955	6495
SMc02261	D	SMc02261_m1	D	-155	-126	GCACTTGTGCCGCTATTATTCAAGCGTATA	35.6	8.2e-19	-41645	18086
SMc02261	D	SMc02261_m2	D	-132	-123	GCGTATAATA	14.3	2.9e-07	-15053	6538
SMc02261	D	SMc02261_m4	D	-132	-120	GCGTATAATAATA	17.0	4.4e-09	-19242	8357
SMa0179	R	SMc02261_m4	R	-57	-45	TCGTTTAATAATA	10.6	2.2e-06	-13027	5658
SMc02261	D	SMc02261_m5	D	-132	-120	GCGTATAATAATA	17.8	2.9e-09	-19659	8538
SMa0179	R	SMc02261_m5	R	-57	-45	TCGTTTAATAATA	9.2	3.7e-06	-12507	5432
SM_b20004	R	SMc02261_m5	R	-81	-69	GCGGATAACAATC	7.7	9.0e-06	-11618	5046
SMc02323	D	SMc02323_m1	D	-120	-108	GATGTCAATCAAA	14.0	1.7e-07	-15587	6770
SM_b20827	D	SMc02323_m1	D	-32	-20	AATGTCAATCACA	13.9	2.5e-07	-15202	6602
SM_b21115	R	SMc02323_m1	R	-78	-66	CTCGTCAATCACA	9.3	7.3e-06	-11828	5137
SM_b21299	D	SMc02323_m1	D	-178	-166	GTTGTCAATCGAG	9.9	4.7e-06	-12268	5328
SMc02323	D	SMc02323_m2	D	-154	-132	TATGATTGGCACCAGATCACACG	9.0	1.2e-06	-13633	5921
SMc02323	D	SMc02323_m2	D	-66	-44	CATGATTGATTGTGATTGACAAT	19.9	2.6e-10	-22070	9585
SMc03140	R	SMc02323_m2	R	-50	-28	TATGATCCTTCTTGTCTGACAAA	8.6	1.5e-06	-13410	5824
SMa1132	D	SMc02323_m2	D	-159	-137	CTTGATCTGTATCAAACAACAAG	8.0	2.1e-06	-13074	5678
SMc02323	D	SMc02323_m3	D	-120	-97	GATGTCAATCAAAAACGATCAAAA	25.8	3.2e-13	-28770	12495
SMc02323	D	SMc02323_m3	D	-110	-87	AAAAACGATCAAAAACGTTCATGA	8.8	2.7e-07	-15125	6569
SM_b20843	R	SMc02323_m3	R	-46	-23	AGAGTGGATCGATAAAGATCATAT	2.9	4.0e-06	-12429	5398
SM_b20608	R	SMc02323_m3	R	-193	-170	CAAAACGATCAAAACTGATCAAGC	1.5	7.1e-06	-11855	5149
SM_b20608	R	SMc02323_m3	R	-183	-160	ACATTCGATACAAAACGATCAAAA	3.9	2.8e-06	-12786	5553
SMc03122	R	SMc02323_m4	R	-247	-238	TGGGAGGAGG	10.3	3.2e-06	-12652	5495
SMa1339	D	SMc02323_m4	D	-18	-9	TGGGAGGAGG	10.3	3.2e-06	-12652	5495
SM_b20033	R	SMc02323_m4	R	-296	-287	TGGGAGGAGC	10.8	9.8e-07	-13836	6009
SMc02323	D	SMc02323_m5	D	-120	-103	GATGTCAATCAAAAACGA	20.1	2.0e-10	-22333	9699
SMa0661	D	SMc02323_m5	D	-211	-194	ATTGTTGATCACAATCAA	5.9	6.8e-06	-11899	5167
SMc02087	R	SMc02340_m1	R	-29	-19	GTGACATCGTG	10.9	3.4e-06	-12592	5469
SMc02340	D	SMc02340_m2	D	-147	-129	ACGTTGTACGTACATCGTA	12.2	2.8e-07	-15088	6553
SMc02340	D	SMc02340_m3	D	-153	-132	TTTGTAACGTTGTACGTACATC	19.5	2.1e-10	-22284	9678
SMc02340	D	SMc02340_m3	D	-73	-52	GATGTACGCTTGTCAGGTCATG	8.9	3.4e-06	-12592	5469
SMc02340	D	SMc02340_m3	D	-65	-44	CTTGTCAGGTCATGGGTACGAC	8.9	3.6e-06	-12535	5444
SM_b21385	D	SMc02340_m3	D	-139	-118	GTTGTCAGGAGTTTTTTACAGC	9.5	2.3e-06	-12983	5638
SMa0825	D	SMc02340_m5	D	-160	-139	ATCTGGTCAATTTCCAGATCTA	0.3	4.2e-06	-12380	5377
SMa0319	D	SMc02366_m1	D	-289	-268	ACTACCGGGGGAGGGCGCTACC	9.4	9.3e-06	-11585	5032
SM_b20484	D	SMc02366_m1	D	-46	-25	GCGCCCGGGAGCGTTCCCCTCG	9.4	9.3e-06	-11585	5032
SMc02366	D	SMc02366_m2	D	-112	-82	GGCGCCGCGACATAAAGCCATGTCGCGGCGC	17.9	5.1e-10	-21397	9292
SM_b21641	R	SMc02366_m2	R	-214	-184	AGCGCCGCGCGTCCGATGAGACGCGCGGCGC	12.1	6.4e-07	-14262	6194
SMc03046	D	SMc02366_m3	D	-256	-243	TACCGCAGCCGCTG	8.8	6.1e-06	-12007	5215
SMc01908	R	SMc02366_m3	R	-228	-215	ACCCGGTCCCGCGG	8.8	7.8e-06	-11761	5108
SMc02340	D	SMc02366_m3	D	-214	-201	GCCCCCCCCCGCTA	9.2	2.1e-06	-13074	5678
SMc00118	R	SMc02366_m5	R	-45	-21	CGCCCGCTGCGTAGCGCAGTCCGCG	10.2	4.6e-06	-12289	5337
SMc02366	D	SMc02366_m5	D	-57	-33	TGCCCGGTACGCACAGCGAACCGAA	10.6	2.4e-06	-12940	5620
SMa0193	R	SMc02470_m1	R	-40	-28	AAATGTCAACCGA	10.9	5.4e-06	-12129	5268
SM_b20673	R	SMc02470_m1	R	-92	-80	CACTGTCAAGCGG	11.8	7.6e-07	-14090	6119
SM_b20674	D	SMc02470_m1	D	-136	-124	CACTGTCAAGCGG	11.8	7.6e-07	-14090	6119
SMc01456	D	SMc02470_m2	D	-122	-93	AAAATTACCGCCGGTGATACCGGCTTGTCA	8.7	5.3e-06	-12148	5276
SMc02470	D	SMc02470_m2	D	-165	-136	TTAATTCAGAGGAGATGCCGACAAATGTCA	19.1	2.5e-10	-22110	9602
SMc01995	D	SMc02470_m3	D	-258	-247	CTTGGGAGGACA	10.4	6.3e-06	-11975	5201
SMc03122	R	SMc02470_m3	R	-247	-236	TTTGGGAGGAGG	10.2	7.8e-06	-11761	5108
SMa2303	R	SMc02470_m3	R	-135	-124	CCTGGGAGGAGA	11.7	1.2e-06	-13633	5921
SM_b20531	D	SMc02470_m3	D	-19	-8	ATTGGGAGGAAG	11.4	1.9e-06	-13174	5721
SM_b20901	R	SMc02470_m3	R	-385	-374	TTTGGGAGGATA	12.3	6.1e-07	-14310	6215
SMc02162	R	SMc02470_m5	R	-133	-115	AATCCGAATTATATAACTT	5.9	6.5e-06	-11944	5187
SMc01551	D	SMc02470_m5	D	-82	-64	AAGACGAATTACATCACAT	5.7	6.8e-06	-11899	5167
SMc02470	D	SMc02470_m5	D	-173	-155	GATGCGGATTAATTCAGAG	17.3	5.0e-09	-19114	8301
SMa0462	R	SMc02470_m5	R	-88	-70	CTTGGGAATTAAATAGAAT	6.6	4.6e-06	-12289	5337
SMc01610	D	SMc02523_m1	D	-183	-167	AGGCGGGGCGAAGGAGA	9.2	7.2e-06	-11841	5143
SMc01975	D	SMc02523_m1	D	-196	-180	TTGCGGGGAGAGGGGAC	16.9	1.4e-09	-20387	8854
SMc01975	D	SMc02523_m1	D	-120	-104	GCGCGGGGAGAGGGCTA	15.9	1.0e-08	-18421	8000
SMc02523	R	SMc02523_m1	R	-130	-114	AAGCGGGGAGAAGGTGC	14.7	5.5e-08	-16716	7260
SMc02523	R	SMc02523_m1	R	-81	-65	GCGCGGGGAGAGGGGAC	16.8	1.9e-09	-20081	8721
SMc03843	R	SMc02523_m1	R	-169	-153	CTGCGGGGAGAAGGTGC	14.8	4.9e-08	-16831	7310
SMc03843	R	SMc02523_m1	R	-116	-100	ACGCGGGGAGAGGGGAC	18.0	6.2e-11	-23504	10208
SM_b20820	D	SMc02523_m1	D	-44	-28	CCGCAGGGAGAGGGGGC	10.0	4.0e-06	-12429	5398
SM_b21300	D	SMc02523_m1	D	-25	-9	GTCCGGGAAGAGGGAGA	9.5	5.8e-06	-12058	5237
SM_b20665	R	SMc02523_m1	R	-254	-238	GCGCGGGGAGAGGGCTA	15.9	1.0e-08	-18421	8000
SM_b20665	R	SMc02523_m1	R	-189	-173	TAACGGGGAGAAGGGAC	11.3	1.4e-06	-13479	5854
SM_b21706	R	SMc02523_m1	R	-396	-380	GCGCGGGGAGAGGGGAC	16.8	1.9e-09	-20081	8721
SM_b21647	R	SMc02523_m1	R	-253	-237	CTGCGGGGAGAGGGTTA	16.0	8.8e-09	-18549	8056
SM_b21647	R	SMc02523_m1	R	-203	-187	CAGCGGGGAGAAGGAGA	13.5	1.8e-07	-15530	6745
SMc02778	D	SMc02523_m2	D	-88	-64	GTGCCGGCAGGCGGATGAGGGGCAG	9.9	5.3e-06	-12148	5276
SMc01975	D	SMc02523_m2	D	-135	-111	GTCCCCTCTCCCCGCGCGCGGGGAG	10.4	2.8e-06	-12786	5553
SMc00658	R	SMc02523_m2	R	-96	-72	GCGCCCCCCCTGCCCCGCGCCGCAG	10.3	3.7e-06	-12507	5432
SMc02523	R	SMc02523_m2	R	-151	-127	GTGCCGGCAGGCGGATGAGGGGCGG	9.8	6.1e-06	-12007	5215
[truncated: 542 more rows]
[truncated: 63 more columns]
