# Supplementary material for: Rhizobium etli CFN42 and Sinorhizobium meliloti 1021 bioinformatic transcriptional regulatory networks from culture and symbiosis
Source: Front Bioinform. 2024 Aug 28;4:1419274. doi: 10.3389/fbinf.2024.1419274 (PMC11387232; doi:10.3389/fbinf.2024.1419274)
Supplement: Supplementary file 4 [file Table4.xlsx]

## Sheet: Hoja1
a) Clustered-TF bacteroid network R. etli CFN42
															b) P-value distribution in the clustered-TF Bacteroid Network					c) Hierarchy															d) Times a regulated gene
																				Tfs	Genes regulated	Start position of the gene	End position of the gene	Strand-gene	GI	Name locus	Locus tag	Protein product	aa of the protein	COG number	COG group	Function	Number of the gene		Gene	Times-regulated gene	Start position of the gene	End position of the gene	Strand-gene	GI	Name locus	Locus tag	Protein product	aa of the protein	COG number	COG group	Function	Number of the gene
Locus_tag	Upstream_region	Matrix_ID	Chain	End_motif	Start_motif	Site	Weight	P_value	Ln_P_value	Significance		884 Unique Targets	364 Unique Tfs		P-value	Counts	Percentage			RHE_RS06405	45	1301853	1302284	D	24300714	-	RHE_RS06405	WP_011424588.1	143	COG4957	K	MULTISPECIES: transcriptional regulator	1230		RHE_RS00340	28	70995	71777	D	24301178	-	RHE_RS00340	WP_011423463.1	260	COG2197	TK	DNA-binding response regulator	59
RHE_RS01300	D	RHE_RS03720_m1	D	-34	-18	TTTAGAATTATTCTAAA	13.0	3.0e-07	-15019	6523		RHE_RS00185	RHE_RS00185		e-04 R_BACTEROID_NETWORK_CFN42_DD_RR	3	0.0433965			RHE_RS00185	37	38852	39607	R	24299130	-	RHE_RS00185	WP_011423440.1	251	COG0745	TK	DNA-binding response regulator	35		RHE_RS06680	27	1362158	1363039	D	24297542	-	RHE_RS06680	WP_011424645.1	293	COG2334	T	aminoglycoside phosphotransferase family protein	1284
RHE_RS03720	D	RHE_RS03720_m1	D	-69	-53	TTTGGAATTGTTCAAAA	16.0	1.3e-08	-18158	7886		RHE_RS00195	RHE_RS00285		e-05 R_BACTEROID_NETWORK_CFN42_DD_RR	175	2.53146			RHE_RS00415	31	88137	88814	R	24298097	-	RHE_RS00415	WP_011423478.1	225	COG1309	K	TetR/AcrR family transcriptional regulator	74		RHE_RS22960	23	18978	19580	D	24302257	-	RHE_RS22960	WP_011427649.1	200			amino acid synthesis family protein	4394
RHE_RS32880	D	RHE_RS03720_m1	D	-103	-87	TTTTGAATTTTCCAGTA	8.4	8.4e-06	-11687	5076		RHE_RS00280	RHE_RS00340		e-06 R_BACTEROID_NETWORK_CFN42_DD_RR	4494	65.008			RHE_RS17835	30	3677381	3677716	D	24297846	-	RHE_RS17835	WP_011426713.1	111	COG0640	K	ArsR family transcriptional regulator	3429		RHE_RS17050	19	3497982	3498683	D	24300689	-	RHE_RS17050	WP_007533606.1	233	COG0745	TK	MULTISPECIES: DNA-binding response regulator	3281
RHE_RS08785	D	RHE_RS03720_m1	D	-58	-42	TTTTGGAACGTTCCAAA	12.4	5.0e-07	-14509	6301		RHE_RS00285	RHE_RS00415		e-07 R_BACTEROID_NETWORK_CFN42_DD_RR	911	13.1781			RHE_RS02355	30	476830	478077	R	24300066	-	RHE_RS02355	WP_011423842.1	415	COG1846	K	ROK family transcriptional regulator	448		RHE_RS16205	19	3324677	3325684	D	24299726	-	RHE_RS16205	WP_011426402.1	335	COG0583	K	LysR family transcriptional regulator	3118
RHE_RS08785	D	RHE_RS03720_m1	D	-57	-41	TTTGGAACGTTCCAAAT	9.3	4.8e-06	-12247	5319		RHE_RS00340	RHE_RS00725		e-08 R_BACTEROID_NETWORK_CFN42_DD_RR	414	5.98872			RHE_RS20580	28	4262380	4263243	D	24299232	-	RHE_RS20580	WP_011427212.1	287	COG0568	K	MULTISPECIES: RNA polymerase factor sigma-32	3969		RHE_RS12585	18	2575379	2576422	D	24299650	-	RHE_RS12585	WP_020921520.1	347	COG1609	K	MULTISPECIES: LacI family DNA-binding transcriptional regulator	2429
RHE_RS09235	R	RHE_RS03720_m1	R	-75	-59	TTGGGAATTTGTCCAAA	8.9	6.1e-06	-12007	5215		RHE_RS00415	RHE_RS00765		e-09 R_BACTEROID_NETWORK_CFN42_DD_RR	267	3.86229			RHE_RS25040	27	229680	230603	R	24302555	-	RHE_RS25040	WP_011428050.1	307	COG4189	K	transcriptional regulator	4804		RHE_RS10400	18	2124570	2124851	D	24299815	-	RHE_RS10400	WP_011425298.1	93			DUF982 domain-containing protein	2004
RHE_RS17040	D	RHE_RS03720_m1	D	-86	-70	TTAGGAACTGTTCCACC	8.8	6.6e-06	-11928	5180		RHE_RS00490	RHE_RS00855		e-10 R_BACTEROID_NETWORK_CFN42_DD_RR	187	2.70505			RHE_RS17050	27	3497982	3498683	D	24300689	-	RHE_RS17050	WP_007533606.1	233	COG0745	TK	MULTISPECIES: DNA-binding response regulator	3281		RHE_RS26875	17	87772	88770	R	24303268	-	RHE_RS26875	WP_073990435.1	332	COG1609	K	LacI family DNA-binding transcriptional regulator	5164
RHE_RS18710	D	RHE_RS03720_m1	D	-77	-61	TTTTGAAAAAGTCCAAA	10.1	2.8e-06	-12786	5553		RHE_RS00580	RHE_RS01095		e-11 R_BACTEROID_NETWORK_CFN42_DD_RR	151	2.18429			RHE_RS12775	27	2612840	2613739	R	24299845	-	RHE_RS12775	WP_011425753.1	299	COG0583	K	LysR family transcriptional regulator	2466		RHE_RS24620	17	135424	136116	D	24302639	-	RHE_RS24620	WP_041679057.1	230	COG1802	K	GntR family transcriptional regulator	4723
RHE_RS01300	D	RHE_RS03720_m2	D	-27	-16	TTATTCTAAATT	11.2	1.2e-06	-13633	5921		RHE_RS00690	RHE_RS01265		e-12 R_BACTEROID_NETWORK_CFN42_DD_RR	120	1.73586			RHE_RS11740	27	2395572	2396306	R	24300701	-	RHE_RS11740	WP_011425557.1	244	COG1802	K	GntR family transcriptional regulator	2269		RHE_RS24615	17	133957	135084	R	24302640	-	RHE_RS24615	WP_011427972.1	375	COG1744	M	BMP family ABC transporter substrate-binding protein	4722
RHE_RS06875	R	RHE_RS03720_m2	R	-181	-170	ATATTCCAAAAA	9.8	9.3e-06	-11585	5032		RHE_RS00725	RHE_RS01350		e-13 R_BACTEROID_NETWORK_CFN42_DD_RR	72	1.04152			RHE_RS26495	26	14842	15837	R	24303344	-	RHE_RS26495	WP_042119940.1	331	COG0583	K	LysR family transcriptional regulator	5089		RHE_RS22795	17	171763	172923	D	24301883	-	RHE_RS22795	WP_011427618.1	386	COG3970	R	fumarylacetoacetate hydrolase	4363
RHE_RS11520	R	RHE_RS03720_m2	R	-136	-125	TTGTTCTAAACT	11.0	1.6e-06	-13346	5796		RHE_RS00730	RHE_RS01410		e-14 R_BACTEROID_NETWORK_CFN42_DD_RR	51	0.73774			RHE_RS06875	26	1403628	1404503	R	24299772	-	RHE_RS06875	WP_020920841.1	291	COG1737	K	MurR/RpiR family transcriptional regulator	1324		RHE_RS22790	17	170393	171403	R	24301884	-	RHE_RS22790	WP_011427617.1	336	COG0673	R	gfo/Idh/MocA family oxidoreductase	4362
RHE_RS16765	D	RHE_RS03720_m2	D	-138	-127	TTATTCTAGAGT	10.0	6.9e-06	-11884	5161		RHE_RS00765	RHE_RS01430		e-15 R_BACTEROID_NETWORK_CFN42_DD_RR	23	0.332706			RHE_RS03720	26	772463	772945	D	24300176	rirA	RHE_RS03720	WP_011424096.1	160	COG1959	K	MULTISPECIES: transcriptional regulator	710		RHE_RS22155	17	33561	34463	R	24302011	-	RHE_RS22155	WP_011427497.1	300	COG0329	EM	dihydrodipicolinate synthase family protein	4241
RHE_RS03595	D	RHE_RS03720_m3	D	-36	-7	ATAAACAGAGAAAATCCCGCTATGTTTTTC	9.9	8.4e-06	-11687	5076		RHE_RS00815	RHE_RS01480		e-16 R_BACTEROID_NETWORK_CFN42_DD_RR	27	0.390568			RHE_RS23635	25	170069	170533	R	24302122	-	RHE_RS23635	WP_011427784.1	154	COG1522	K	Lrp/AsnC family transcriptional regulator	4528		RHE_RS25035	16	227960	229468	R	24302556	-	RHE_RS25035	WP_011428049.1	502	COG3534	G	alpha-N-arabinofuranosidase	4803
RHE_RS04650	R	RHE_RS03720_m3	R	-122	-93	GAAAACTGTTAGAATAATTTACATGTTTCA	11.6	1.3e-06	-13553	5886		RHE_RS00850	RHE_RS01660		e-17 R_BACTEROID_NETWORK_CFN42_DD_RR	9	0.130189			RHE_RS00855	25	182424	183161	D	24298508	phnF	RHE_RS00855	WP_011423562.1	245	COG2188	K	phosphonate metabolism transcriptional regulator PhnF	161		RHE_RS11740	16	2395572	2396306	R	24300701	-	RHE_RS11740	WP_011425557.1	244	COG1802	K	GntR family transcriptional regulator	2269
RHE_RS04655	D	RHE_RS03720_m3	D	-91	-62	GAAAACTGTTAGAATAATTTACATGTTTCA	11.6	1.3e-06	-13553	5886		RHE_RS00855	RHE_RS01720		e-18 R_BACTEROID_NETWORK_CFN42_DD_RR	4	0.057862			RHE_RS15890	24	3254161	3254610	D	24301077	-	RHE_RS15890	WP_042119308.1	149	COG1846	K	MarR family transcriptional regulator	3056		RHE_RS10680	16	2179844	2180806	D	24299764	-	RHE_RS10680	WP_011425353.1	320	COG1879	G	sugar ABC transporter substrate-binding protein	2062
RHE_RS13215	R	RHE_RS03720_m3	R	-54	-25	AGAAAATGCGAGGGATTATTCGTATTTTTG	10.8	3.8e-06	-12481	5420		RHE_RS01095	RHE_RS01740		e-19 R_BACTEROID_NETWORK_CFN42_DD_RR	5	0.0723275			RHE_RS11340	24	2321563	2321949	R	24299669	-	RHE_RS11340	WP_029531229.1	128	COG0789	K	MULTISPECIES: MerR family DNA-binding transcriptional regulator	2191		RHE_RS09390	16	1926684	1927778	D	24300029	-	RHE_RS09390	WP_011425128.1	364	COG4872	S	DUF2157 domain-containing protein	1812
RHE_RS13220	D	RHE_RS03720_m3	D	-71	-42	AGAAAATGCGAGGGATTATTCGTATTTTTG	10.8	3.8e-06	-12481	5420		RHE_RS01125	RHE_RS02045		Total	6913	100			RHE_RS03175	23	648102	648479	D	24300681	-	RHE_RS03175	WP_011423992.1	125	COG0745	TK	response regulator	605		RHE_RS31005	15	333056	334012	D	24297318	-	RHE_RS31005	WP_004677768.1	318	COG0583	K	MULTISPECIES: Nodulation protein D 2	5962
RHE_RS18710	D	RHE_RS03720_m3	D	-73	-44	GAAAAAGTCCAAAAAAGGTCCACCTTTTTC	11.2	2.1e-06	-13074	5678		RHE_RS01170	RHE_RS02165							RHE_RS25970	22	412994	413578	R	24302369	-	RHE_RS25970	WP_011428225.1	194	COG0662	G	XRE family transcriptional regulator	4985		RHE_RS20575	15	4261433	4262005	D	24299984	-	RHE_RS20575	WP_011427211.1	190	COG1329	K	MULTISPECIES: CarD family transcriptional regulator	3968
RHE_RS22790	R	RHE_RS03720_m3	R	-161	-132	TTAAATACATGAAAAATAATGATTATTTTG	12.6	3.8e-07	-14783	6420		RHE_RS01185	RHE_RS02310							RHE_RS25580	22	333385	334224	R	24302447	-	RHE_RS25580	WP_011428152.1	279	COG1414	K	IclR family transcriptional regulator	4907		RHE_RS17400	15	3578532	3578870	D	24299587	-	RHE_RS17400	WP_011426630.1	112			MULTISPECIES: hypothetical protein	3343
RHE_RS22795	D	RHE_RS03720_m3	D	-232	-203	TTAAATACATGAAAAATAATGATTATTTTG	12.6	3.8e-07	-14783	6420		RHE_RS01265	RHE_RS02315							RHE_RS05495	22	1129379	1129708	R	24297494	-	RHE_RS05495	WP_011424419.1	109	COG0640	K	ArsR family transcriptional regulator	1055		RHE_RS11295	15	2313743	2314348	D	24301423	-	RHE_RS11295	WP_011425471.1	201	COG3672	O	hypothetical protein	2182
RHE_RS25695	D	RHE_RS03720_m3	D	-194	-165	TAAAAAAAAGCTAACAACTCAAGAATTTGA	9.8	9.3e-06	-11585	5032		RHE_RS01300	RHE_RS02340							RHE_RS03595	22	735365	736234	D	24299199	-	RHE_RS03595	WP_042117916.1	289	COG0583	K	LysR family transcriptional regulator	689		RHE_RS26015	14	418354	418980	R	24302360	-	RHE_RS26015	WP_011428233.1	208	COG1309	K	TetR/AcrR family transcriptional regulator	4993
RHE_RS03720	D	RHE_RS03720_m4	D	-49	-34	CCAAACCGCCTATATA	10.2	5.0e-06	-12206	5301		RHE_RS01340	RHE_RS02355							RHE_RS28160	21	372951	373856	R	24303011	-	RHE_RS28160	WP_011428639.1	301	COG0583	K	LysR family transcriptional regulator	5419		RHE_RS25800	14	374136	375662	D	24302403	-	RHE_RS25800	WP_011428194.1	508	COG0747	E	peptide ABC transporter	4951
RHE_RS06210	R	RHE_RS03720_m4	R	-136	-121	CAAAAACTCTCATAAA	10.1	6.2e-06	-11991	5208		RHE_RS01345	RHE_RS02400							RHE_RS27645	21	250775	251488	D	24303114	-	RHE_RS27645	WP_011428542.1	237	COG2186	K	FadR family transcriptional regulator	5316		RHE_RS25795	14	373325	373909	R	24302404	-	RHE_RS25795	WP_011428193.1	194	COG3506	S	DUF1349 domain-containing protein	4950
RHE_RS06215	D	RHE_RS03720_m4	D	-44	-29	CAAAAACTCTCATAAA	10.1	6.2e-06	-11991	5208		RHE_RS01350	RHE_RS02600							RHE_RS25595	21	339020	339547	D	24302444	-	RHE_RS25595	WP_011428155.1	175	COG5631	K	transcriptional regulator	4910		RHE_RS20810	14	4314798	4315589	D	24299511	-	RHE_RS20810	WP_011427254.1	263	COG0725	P	molybdate ABC transporter substrate-binding protein	4014
RHE_RS10365	D	RHE_RS03720_m4	D	-151	-136	GTAGAGAGCTTATATT	9.9	7.0e-06	-11870	5155		RHE_RS01355	RHE_RS02710							RHE_RS16760	21	3437035	3437829	D	24299921	-	RHE_RS16760	WP_011426509.1	264	COG0784	T	two-component response regulator	3225		RHE_RS18970	14	3931874	3932926	D	24299008	-	RHE_RS18970	WP_011426920.1	350	COG1609	K	LacI family DNA-binding transcriptional regulator	3654
RHE_RS10400	D	RHE_RS03720_m4	D	-30	-15	AAAAAAGTAATATAAA	11.0	1.9e-06	-13174	5721		RHE_RS01390	RHE_RS02715							RHE_RS16230	21	3329555	3330778	R	24299188	-	RHE_RS16230	WP_011426407.1	407	COG1846	K	ROK family transcriptional regulator	3123		RHE_RS18760	14	3884712	3885695	D	24300223	-	RHE_RS18760	WP_011426881.1	327	COG2390	K	sugar-binding transcriptional regulator	3613
RHE_RS20885	D	RHE_RS03720_m4	D	-41	-26	ATAAAGGTTCTATATG	11.3	1.3e-06	-13553	5886		RHE_RS01410	RHE_RS02765							RHE_RS14875	21	3045950	3046660	D	24301275	-	RHE_RS14875	WP_011426154.1	236	COG1802	K	GntR family transcriptional regulator	2863		RHE_RS18680	14	3868538	3869218	D	24298133	-	RHE_RS18680	WP_011426866.1	226	COG1309	K	TetR/AcrR family transcriptional regulator	3597
RHE_RS00690	R	RHE_RS03720_m5	R	-108	-97	TAAAAAGTGAGA	10.6	2.6e-06	-12860	5585		RHE_RS01430	RHE_RS02835							RHE_RS12060	21	2468122	2469075	R	24298773	-	RHE_RS12060	WP_011425620.1	317	COG1879	G	LacI family transcriptional regulator	2331		RHE_RS13430	14	2735806	2736180	R	24299734	-	RHE_RS13430	WP_011425873.1	124	COG0346	Q	VOC family protein	2586
RHE_RS09225	D	RHE_RS03720_m5	D	-53	-42	AAAAAAATGAAA	11.0	1.4e-06	-13479	5854		RHE_RS01465	RHE_RS02855							RHE_RS10890	21	2228912	2229652	D	24299303	-	RHE_RS10890	WP_042118472.1	246	COG0745	TK	DNA-binding response regulator	2104		RHE_RS10365	14	2115079	2116572	D	24299908	-	RHE_RS10365	WP_011425291.1	497	COG0654	HC	hypothetical protein	1997
RHE_RS22090	D	RHE_RS03720_m5	D	-34	-23	TTAAAAACGAAA	9.7	8.9e-06	-11629	5051		RHE_RS01480	RHE_RS03000							RHE_RS10580	21	2158259	2159314	R	24299419	-	RHE_RS10580	WP_011425334.1	351	COG1609	K	LacI family transcriptional regulator	2042		RHE_RS06495	14	1318658	1318921	R	24300623	-	RHE_RS06495	WP_011424608.1	87			hypothetical protein	1248
RHE_RS00185	R	RHE_RS00185_m1	R	-207	-192	ACAAATTTAAATCGAT	13.0	2.7e-07	-15125	6569		RHE_RS01495	RHE_RS03040							RHE_RS06015	21	1225501	1225983	R	24300982	-	RHE_RS06015	WP_011424512.1	160	COG1846	K	MarR family transcriptional regulator	1151		RHE_RS30520	13	243127	244815	D	24297272	nifA	RHE_RS30520	WP_011053431.1	562	COG3604	KT	MULTISPECIES: nif-specific transcriptional activator NifA	5874
RHE_RS00185	R	RHE_RS00185_m1	R	-187	-172	AACGATTTAAAAAGAA	12.0	9.0e-07	-13921	6046		RHE_RS01645	RHE_RS03175							RHE_RS05255	21	1086690	1087337	R	24300250	-	RHE_RS05255	WP_011424377.1	215	COG1974	KT	transcriptional regulator	1010		RHE_RS25465	13	309908	311113	D	24302470	-	RHE_RS25465	WP_011428129.1	401	COG0683	E	ABC transporter permease	4884
RHE_RS00690	R	RHE_RS00185_m1	R	-105	-90	GTAGATTTAAAAAGTG	10.2	5.4e-06	-12129	5268		RHE_RS01655	RHE_RS03180							RHE_RS24090	20	18952	19392	D	24302745	-	RHE_RS24090	WP_011427872.1	146	COG3279	KT	response regulator	4617		RHE_RS25040	13	229680	230603	R	24302555	-	RHE_RS25040	WP_011428050.1	307	COG4189	K	transcriptional regulator	4804
RHE_RS08785	D	RHE_RS00185_m1	D	-158	-143	CACGATTTAAATCGTT	12.9	3.1e-07	-14987	6509		RHE_RS01660	RHE_RS03210							RHE_RS13750	20	2798801	2799247	R	24297755	-	RHE_RS13750	WP_041678693.1	148	COG3832	S	transcriptional regulator	2645		RHE_RS24660	13	146565	149153	D	24302631	-	RHE_RS24660	WP_011427981.1	862	COG0790	T	peptidase	4731
RHE_RS11900	R	RHE_RS00185_m1	R	-103	-88	AGATTTTTAAATCTGT	11.5	1.5e-06	-13410	5824		RHE_RS01720	RHE_RS03275							RHE_RS08025	20	1653220	1654098	R	24300585	-	RHE_RS08025	WP_042119226.1	292	COG0583	K	LysR family transcriptional regulator	1551		RHE_RS23920	13	225236	225799	D	24302065	-	RHE_RS23920	WP_011427837.1	187	COG3090	G	TRAP transporter small permease	4586
RHE_RS11905	D	RHE_RS00185_m1	D	-192	-177	AGATTTTTAAATCTGT	11.5	1.5e-06	-13410	5824		RHE_RS01740	RHE_RS03430							RHE_RS01350	20	278641	279549	D	24301226	-	RHE_RS01350	WP_011423652.1	302	COG0583	K	LysR family transcriptional regulator	256		RHE_RS23915	13	224314	224952	R	24302066	-	RHE_RS23915	WP_011427836.1	212	COG1309	K	TetR/AcrR family transcriptional regulator	4585
RHE_RS18970	D	RHE_RS00185_m1	D	-207	-192	AACAATTTAAAACGTT	14.2	4.9e-08	-16831	7310		RHE_RS01775	RHE_RS03515							RHE_RS27280	19	171608	172357	R	24303187	-	RHE_RS27280	WP_011428471.1	249	COG1802	K	GntR family transcriptional regulator	5247		RHE_RS20665	13	4281761	4282012	D	24298648	-	RHE_RS20665	WP_011427229.1	83	COG0236	IQ	MULTISPECIES: acyl carrier protein	3986
RHE_RS18970	D	RHE_RS00185_m1	D	-86	-71	TAAAATTTAAAACGTT	12.2	7.3e-07	-14130	6137		RHE_RS01780	RHE_RS03595							RHE_RS25540	19	325094	325906	R	24302455	-	RHE_RS25540	WP_011428144.1	270	COG1349	KG	MULTISPECIES: DeoR/GlpR transcriptional regulator	4899		RHE_RS20490	13	4243847	4244623	D	24300911	-	RHE_RS20490	WP_020922551.1	258	COG1349	KG	DeoR/GlpR transcriptional regulator	3950
RHE_RS30570	R	RHE_RS00185_m1	R	-67	-52	ACCGATTTGAACCACT	9.6	8.9e-06	-11629	5051		RHE_RS01790	RHE_RS03610							RHE_RS24095	19	19393	20133	R	24302744	-	RHE_RS24095	WP_041679049.1	246	COG1309	K	TetR/AcrR family transcriptional regulator	4618		RHE_RS16880	13	3465472	3466083	R	24298399	ureG	RHE_RS16880	WP_011426534.1	203	COG0378	O	urease accessory protein UreG	3248
RHE_RS00185	R	RHE_RS00185_m2	R	-215	-192	ACAAATTTAAATCGATTAATTATT	14.9	3.8e-08	-17086	7420		RHE_RS01930	RHE_RS03720							RHE_RS22030	19	7468	8115	R	24302036	-	RHE_RS22030	WP_032490474.1	215	COG1309	K	TetR/AcrR family transcriptional regulator	4217		RHE_RS16420	13	3371230	3371940	R	24301504	-	RHE_RS16420	WP_011426444.1	236	COG2227	H	class I SAM-dependent methyltransferase	3158
RHE_RS00185	R	RHE_RS00185_m2	R	-195	-172	AACGATTTAAAAAGAACGAAACAA	8.9	5.2e-06	-12167	5284		RHE_RS01975	RHE_RS03775							RHE_RS20595	19	4266876	4267403	D	24297880	-	RHE_RS20595	WP_020922561.1	175	COG1846	K	MarR family transcriptional regulator	3972		RHE_RS15155	13	3097713	3098957	R	24297779	-	RHE_RS15155	WP_011426206.1	414	COG2814	G	tetracycline resistance MFS efflux pump	2918
RHE_RS00185	R	RHE_RS00185_m2	R	-186	-163	GGCTCTTCAAACGATTTAAAAAGA	8.7	6.5e-06	-11944	5187		RHE_RS02045	RHE_RS04010							RHE_RS20060	19	4151972	4152886	R	24300316	-	RHE_RS20060	WP_042119077.1	304	COG0583	K	LysR family transcriptional regulator	3863		RHE_RS12760	13	2611162	2612160	D	24297475	-	RHE_RS12760	WP_011425750.1	332	COG2113	E	ABC transporter substrate-binding protein	2463
RHE_RS02355	R	RHE_RS00185_m2	R	-186	-163	AATAATTCAATTGGATTTATTTAT	9.5	3.4e-06	-12592	5469		RHE_RS02130	RHE_RS04025							RHE_RS18760	19	3884712	3885695	D	24300223	-	RHE_RS18760	WP_011426881.1	327	COG2390	K	sugar-binding transcriptional regulator	3613		RHE_RS03180	13	648955	649659	D	24300680	-	RHE_RS03180	WP_011423993.1	234	COG2197	TK	helix-turn-helix transcriptional regulator	606
RHE_RS04650	R	RHE_RS00185_m2	R	-119	-96	AACTGTTAGAATAATTTACATGTT	8.6	6.9e-06	-11884	5161		RHE_RS02135	RHE_RS04030							RHE_RS10220	19	2081072	2085139	D	24298335	-	RHE_RS10220	WP_042118412.1	1355			XRE family transcriptional regulator	1969		RHE_RS30570	12	253590	254093	R	24297136	-	RHE_RS30570	WP_010069248.1	167	COG1396	K	MULTISPECIES: XRE family transcriptional regulator	5883
RHE_RS04655	D	RHE_RS00185_m2	D	-88	-65	AACTGTTAGAATAATTTACATGTT	8.6	6.9e-06	-11884	5161		RHE_RS02140	RHE_RS04310							RHE_RS06955	19	1426050	1426829	R	24299910	-	RHE_RS06955	WP_011424698.1	259	COG2197	TK	DNA-binding response regulator	1339		RHE_RS29825	12	87466	88995	D	24297460	-	RHE_RS29825	WP_004668604.1	509			MULTISPECIES: hypothetical protein	5743
RHE_RS05465	R	RHE_RS00185_m2	R	-187	-164	CATGGTTTAATAATATTCAAATTC	9.2	4.3e-06	-12357	5367		RHE_RS02165	RHE_RS04315							RHE_RS05330	19	1099101	1099445	R	24297929	-	RHE_RS05330	WP_011424390.1	114	COG0640	K	ArsR family transcriptional regulator	1025		RHE_RS29780	12	76914	77354	D	24297394	-	RHE_RS29780	WP_032984836.1	146			MULTISPECIES: hypothetical protein	5734
RHE_RS06680	D	RHE_RS00185_m2	D	-138	-115	TAATATTCAAATTATACTAATATA	8.6	6.5e-06	-11944	5187		RHE_RS02190	RHE_RS04575							RHE_RS29335	18	622446	622661	R	24302776	-	RHE_RS29335	WP_011428858.1	71	COG3905	K	CopG family transcriptional regulator	5647		RHE_RS29775	12	76014	76511	R	24297264	-	RHE_RS29775	WP_029875506.1	165			MULTISPECIES: XRE family transcriptional regulator	5733
RHE_RS06820	D	RHE_RS00185_m2	D	-374	-351	GACAATTTTAACGAGTTCAAATTT	8.3	7.8e-06	-11761	5108		RHE_RS02195	RHE_RS04625							RHE_RS20575	18	4261433	4262005	D	24299984	-	RHE_RS20575	WP_011427211.1	190	COG1329	K	MULTISPECIES: CarD family transcriptional regulator	3968		RHE_RS27645	12	250775	251488	D	24303114	-	RHE_RS27645	WP_011428542.1	237	COG2186	K	FadR family transcriptional regulator	5316
RHE_RS08095	D	RHE_RS00185_m2	D	-73	-50	ATAGATTGTAAAGATTTCAAACAA	9.5	3.7e-06	-12507	5432		RHE_RS02230	RHE_RS04645							RHE_RS18795	18	3890006	3890860	D	24300242	-	RHE_RS18795	WP_011426888.1	284	COG1737	K	MULTISPECIES: MurR/RpiR family transcriptional regulator	3620		RHE_RS27525	12	222246	223259	D	24303138	-	RHE_RS27525	WP_011428519.1	337	COG1609	K	LacI family DNA-binding transcriptional regulator	5294
RHE_RS08785	D	RHE_RS00185_m2	D	-158	-135	CACGATTTAAATCGTTCCAAAAGT	11.8	6.0e-07	-14326	6222		RHE_RS02290	RHE_RS04655							RHE_RS16205	18	3324677	3325684	D	24299726	-	RHE_RS16205	WP_011426402.1	335	COG0583	K	LysR family transcriptional regulator	3118		RHE_RS27305	12	176233	178416	R	24303182	-	RHE_RS27305	WP_011428476.1	727			DUF1217 domain-containing protein	5252
RHE_RS11900	R	RHE_RS00185_m2	R	-111	-88	AGATTTTTAAATCTGTTACAATTT	13.0	2.2e-07	-15330	6658		RHE_RS02310	RHE_RS04705							RHE_RS14135	18	2879011	2879475	R	24298124	-	RHE_RS14135	WP_011426008.1	154	COG1522	K	Lrp/AsnC family transcriptional regulator	2719		RHE_RS25565	12	331387	332595	D	24302450	-	RHE_RS25565	WP_011428149.1	402	COG3964	R	amidohydrolase/deacetylase family metallohydrolase	4904
RHE_RS11905	D	RHE_RS00185_m2	D	-192	-169	AGATTTTTAAATCTGTTACAATTT	13.0	2.2e-07	-15330	6658		RHE_RS02315	RHE_RS05000							RHE_RS07480	18	1538983	1539567	R	24297891	-	RHE_RS07480	WP_011424799.1	194	COG1309	K	TetR/AcrR family transcriptional regulator	1446		RHE_RS24475	12	100394	101236	R	24302668	-	RHE_RS24475	WP_011427946.1	280	COG2207	K	AraC family transcriptional regulator	4695
RHE_RS12585	D	RHE_RS00185_m2	D	-260	-237	AATGTAATAATCATTTTCAAATTT	8.1	9.0e-06	-11618	5046		RHE_RS02330	RHE_RS05020							RHE_RS28555	17	461297	461926	D	24302932	-	RHE_RS28555	WP_011428713.1	209	COG1309	K	TetR/AcrR family transcriptional regulator	5497		RHE_RS18900	12	3915607	3916362	D	24298669	-	RHE_RS18900	WP_041678762.1	251	COG2186	K	FadR family transcriptional regulator	3641
RHE_RS14170	R	RHE_RS00185_m2	R	-261	-238	TCCTATTTAAAAGAGATTATTTTT	8.1	9.0e-06	-11618	5046		RHE_RS02340	RHE_RS05170							RHE_RS24620	17	135424	136116	D	24302639	-	RHE_RS24620	WP_041679057.1	230	COG1802	K	GntR family transcriptional regulator	4723		RHE_RS15870	12	3249907	3250098	R	24298781	-	RHE_RS15870	WP_011426339.1	63			DUF2735 domain-containing protein	3052
RHE_RS14175	D	RHE_RS00185_m2	D	-198	-175	TCCTATTTAAAAGAGATTATTTTT	8.1	9.0e-06	-11618	5046		RHE_RS02355	RHE_RS05255							RHE_RS23080	17	44447	44824	R	24302233	-	RHE_RS23080	WP_042119708.1	125	COG1733	K	transcriptional regulator	4419		RHE_RS15090	12	3077615	3079672	R	24299446	-	RHE_RS15090	WP_011426193.1	685	COG0568	K	MULTISPECIES: RNA polymerase sigma factor RpoD	2905
RHE_RS16205	D	RHE_RS00185_m2	D	-54	-31	ATATCGTTAAAAAGTATTACTTTT	11.1	1.0e-06	-13816	6000		RHE_RS02385	RHE_RS05265							RHE_RS22605	17	130935	132008	D	24301921	-	RHE_RS22605	WP_011427582.1	357	COG1609	K	LacI family transcriptional regulator	4326		RHE_RS14170	12	2885188	2885940	R	24297802	-	RHE_RS14170	WP_011426015.1	250	COG0854	H	pyridoxine 5\'-phosphate synthase	2726
RHE_RS17050	D	RHE_RS00185_m2	D	-144	-121	AATTATTTAATAAATTCGATACTC	8.6	6.5e-06	-11944	5187		RHE_RS02395	RHE_RS05315							RHE_RS19745	17	4091498	4092391	R	24301476	-	RHE_RS19745	WP_011427055.1	297	COG0583	K	MULTISPECIES: LysR family transcriptional regulator	3800		RHE_RS11905	12	2431854	2432348	D	24298859	-	RHE_RS11905	WP_011425590.1	164	COG2062	T	histidine phosphatase family protein	2302
RHE_RS18970	D	RHE_RS00185_m2	D	-207	-184	AACAATTTAAAACGTTATAAGCCT	12.9	2.4e-07	-15243	6620		RHE_RS02400	RHE_RS05330							RHE_RS17595	17	3626357	3627247	R	24298709	-	RHE_RS17595	WP_011426669.1	296	COG0662	G	AraC family transcriptional regulator	3382		RHE_RS11900	12	2431159	2431578	R	24300363	dksA	RHE_RS11900	WP_008525884.1	139	COG1734	J	MULTISPECIES: RNA polymerase-binding protein DksA	2301
RHE_RS18970	D	RHE_RS00185_m2	D	-86	-63	TAAAATTTAAAACGTTTTCATTGT	14.0	8.9e-08	-16235	7051		RHE_RS02420	RHE_RS05380							RHE_RS16800	17	3447193	3448194	R	24299517	-	RHE_RS16800	WP_042118941.1	333	COG4977	K	transcriptional regulator FtrA	3232		RHE_RS06955	12	1426050	1426829	R	24299910	-	RHE_RS06955	WP_011424698.1	259	COG2197	TK	DNA-binding response regulator	1339
RHE_RS27525	D	RHE_RS00185_m2	D	-102	-79	CTTAATTGAAATCGATTTCAATTA	9.1	4.6e-06	-12289	5337		RHE_RS02425	RHE_RS05415							RHE_RS10510	17	2143863	2145062	R	24301073	-	RHE_RS10510	WP_011425320.1	399	COG1846	K	ROK family transcriptional regulator	2027		RHE_RS05945	12	1213098	1213820	R	24301194	-	RHE_RS05945	WP_011424499.1	240	COG2197	TK	LuxR family transcriptional regulator	1137
RHE_RS00690	R	RHE_RS00185_m3	R	-104	-93	GATTTAAAAAGT	10.9	2.2e-06	-13027	5658		RHE_RS02430	RHE_RS05495							RHE_RS06620	17	1341246	1341992	D	24298453	-	RHE_RS06620	WP_041678849.1	248	COG0745	TK	DNA-binding response regulator	1272		RHE_RS05730	12	1171858	1172895	D	24299250	-	RHE_RS05730	WP_011424462.1	345	COG1609	K	LacI family DNA-binding transcriptional regulator	1098
RHE_RS00185	R	RHE_RS00185_m4	R	-205	-178	TTAAAAAGAACGAAACAAATTTAAATCG	13.1	2.3e-07	-15285	6638		RHE_RS02490	RHE_RS05730							RHE_RS05945	17	1213098	1213820	R	24301194	-	RHE_RS05945	WP_011424499.1	240	COG2197	TK	LuxR family transcriptional regulator	1137		RHE_RS04655	12	975113	975997	D	24299187	-	RHE_RS04655	WP_011424272.1	294	COG0583	K	LysR family transcriptional regulator	893
RHE_RS00185	R	RHE_RS00185_m4	R	-204	-177	TTTAAAAAGAACGAAACAAATTTAAATC	16.6	4.5e-09	-19219	8347		RHE_RS02555	RHE_RS05735							RHE_RS05815	17	1190760	1191380	R	24297599	-	RHE_RS05815	WP_011424479.1	206	COG1309	K	transcriptional regulator BetI	1115		RHE_RS04650	12	974547	974933	R	24298158	-	RHE_RS04650	WP_011424271.1	128	COG0662	G	MULTISPECIES: ectoine synthase	892
RHE_RS00185	R	RHE_RS00185_m4	R	-203	-176	ATTTAAAAAGAACGAAACAAATTTAAAT	9.1	7.4e-06	-11814	5131		RHE_RS02570	RHE_RS05750							RHE_RS05790	17	1186036	1186482	D	24297560	-	RHE_RS05790	WP_011424474.1	148	COG1959	K	Rrf2 family transcriptional regulator	1110		RHE_RS04545	12	950723	950986	R	24297567	-	RHE_RS04545	WP_020920549.1	87			DUF982 domain-containing protein	871
RHE_RS02165	D	RHE_RS00185_m4	D	-75	-48	TGAAAATAATTAAGCAATACGTTAATTG	10.9	1.7e-06	-13285	5770		RHE_RS02580	RHE_RS05790							RHE_RS02715	17	555258	555905	R	24297594	-	RHE_RS02715	WP_011423908.1	215	COG2197	TK	DNA-binding response regulator	516		RHE_RS00185	12	38852	39607	R	24299130	-	RHE_RS00185	WP_011423440.1	251	COG0745	TK	DNA-binding response regulator	35
RHE_RS02230	D	RHE_RS00185_m4	D	-102	-75	CGTAAATATTAGAAATCTAACTTTAATC	9.6	5.0e-06	-12206	5301		RHE_RS02595	RHE_RS05815							RHE_RS28900	16	537520	538443	D	24302863	-	RHE_RS28900	WP_011428781.1	307	COG0583	K	LysR family transcriptional regulator	5564		RHE_RS30635	11	263641	264693	R	24297254	-	RHE_RS30635	WP_042120145.1	350	COG1304	CIR	type 2 isopentenyl-diphosphate Delta-isomerase	5892
RHE_RS04650	R	RHE_RS00185_m4	R	-117	-90	TGTGAAAACTGTTAGAATAATTTACATG	9.6	5.0e-06	-12206	5301		RHE_RS02600	RHE_RS05855							RHE_RS28370	16	420757	421419	D	24302969	-	RHE_RS28370	WP_086005059.1	220	COG1309	K	TetR/AcrR family transcriptional regulator	5460		RHE_RS28710	11	491401	491865	D	24302901	-	RHE_RS28710	WP_011428743.1	154	COG1522	K	Lrp/AsnC family transcriptional regulator	5526
RHE_RS04655	D	RHE_RS00185_m4	D	-94	-67	TGTGAAAACTGTTAGAATAATTTACATG	9.6	5.0e-06	-12206	5301		RHE_RS02640	RHE_RS05915							RHE_RS25725	16	360991	361899	D	24302418	-	RHE_RS25725	WP_042119897.1	302	COG0583	K	LysR family transcriptional regulator	4936		RHE_RS28555	11	461297	461926	D	24302932	-	RHE_RS28555	WP_011428713.1	209	COG1309	K	TetR/AcrR family transcriptional regulator	5497
RHE_RS06635	R	RHE_RS00185_m4	R	-121	-94	GTAAAAATCCGTTAACTATTTATATTTC	10.9	1.9e-06	-13174	5721		RHE_RS02645	RHE_RS05945							RHE_RS25605	16	339943	340566	D	24302442	-	RHE_RS25605	WP_011428157.1	207	COG1309	K	TetR/AcrR family transcriptional regulator	4912		RHE_RS24090	11	18952	19392	D	24302745	-	RHE_RS24090	WP_011427872.1	146	COG3279	KT	response regulator	4617
RHE_RS06635	R	RHE_RS00185_m4	R	-120	-93	GGTAAAAATCCGTTAACTATTTATATTT	11.5	1.0e-06	-13816	6000		RHE_RS02680	RHE_RS06015							RHE_RS25455	16	308167	309120	R	24302472	-	RHE_RS25455	WP_011428127.1	317	COG0583	K	LysR family transcriptional regulator	4882		RHE_RS22145	11	30898	32031	R	24302013	-	RHE_RS22145	WP_011427495.1	377	COG1454	C	alcohol dehydrogenase	4239
RHE_RS10680	D	RHE_RS00185_m4	D	-81	-54	TAAAAAAAGCGATTTACAAAAGTAATAC	9.8	4.3e-06	-12357	5367		RHE_RS02710	RHE_RS06025							RHE_RS24980	16	214520	215446	D	24302567	-	RHE_RS24980	WP_011428041.1	308	COG2207	K	AraC family transcriptional regulator	4794		RHE_RS18665	11	3864321	3865343	R	24297548	-	RHE_RS18665	WP_011426863.1	340	COG1879	G	LacI family DNA-binding transcriptional regulator	3594
RHE_RS10680	D	RHE_RS00185_m4	D	-80	-53	AAAAAAAGCGATTTACAAAAGTAATACT	8.8	9.3e-06	-11585	5032		RHE_RS02715	RHE_RS06105							RHE_RS23915	16	224314	224952	R	24302066	-	RHE_RS23915	WP_011427836.1	212	COG1309	K	TetR/AcrR family transcriptional regulator	4585		RHE_RS18560	11	3841280	3842173	D	24298320	-	RHE_RS18560	WP_020922298.1	297	COG0583	K	LysR family transcriptional regulator	3574
RHE_RS13735	R	RHE_RS00185_m4	R	-398	-371	AAAAAATCTGGAAAACACTTTTAAATTG	9.4	5.8e-06	-12058	5237		RHE_RS02765	RHE_RS06135							RHE_RS21205	16	23982	25016	R	24301851	-	RHE_RS21205	WP_011427325.1	344	COG2390	K	MULTISPECIES: sugar-binding transcriptional regulator	4088		RHE_RS16260	11	3337307	3338374	D	24298479	-	RHE_RS16260	WP_011426415.1	355	COG0664	T	cyclic nucleotide-gated potassium channel protein	3129
RHE_RS13735	R	RHE_RS00185_m4	R	-397	-370	AAAAAAATCTGGAAAACACTTTTAAATT	16.4	5.8e-09	-18965	8237		RHE_RS02790	RHE_RS06175							RHE_RS20285	16	4193915	4194598	D	24300121	-	RHE_RS20285	WP_011427159.1	227	COG0745	TK	MULTISPECIES: DNA-binding response regulator	3910		RHE_RS14175	11	2886372	2887064	D	24297801	-	RHE_RS14175	WP_011426016.1	230	COG0789	K	MerR family DNA-binding transcriptional regulator	2727
RHE_RS13735	R	RHE_RS00185_m4	R	-396	-369	GAAAAAAATCTGGAAAACACTTTTAAAT	11.9	7.2e-07	-14144	6143		RHE_RS02800	RHE_RS06215							RHE_RS19030	16	3945009	3945968	D	24300473	-	RHE_RS19030	WP_011426931.1	319	COG3284	K	sigma-54-dependent Fis family transcriptional regulator	3666		RHE_RS13150	11	2681532	2682368	D	24300600	-	RHE_RS13150	WP_011425823.1	278	COG2267	I	alpha/beta hydrolase	2535
RHE_RS16040	D	RHE_RS00185_m4	D	-45	-18	CATAAACAAAGGTTGTATTTTTTTATAT	9.7	5.0e-06	-12206	5301		RHE_RS02830	RHE_RS06405							RHE_RS18970	16	3931874	3932926	D	24299008	-	RHE_RS18970	WP_011426920.1	350	COG1609	K	LacI family DNA-binding transcriptional regulator	3654		RHE_RS08785	11	1799309	1800364	D	24301455	-	RHE_RS08785	WP_011425012.1	351	COG1609	K	LacI family DNA-binding transcriptional regulator	1692
RHE_RS16040	D	RHE_RS00185_m4	D	-44	-17	ATAAACAAAGGTTGTATTTTTTTATATT	13.2	2.1e-07	-15376	6678		RHE_RS02835	RHE_RS06535							RHE_RS18235	16	3763946	3764800	R	24299179	-	RHE_RS18235	WP_042119009.1	284	COG0583	K	LysR family transcriptional regulator	3509		RHE_RS06015	11	1225501	1225983	R	24300982	-	RHE_RS06015	WP_011424512.1	160	COG1846	K	MarR family transcriptional regulator	1151
RHE_RS16040	D	RHE_RS00185_m4	D	-43	-16	TAAACAAAGGTTGTATTTTTTTATATTC	10.1	3.6e-06	-12535	5444		RHE_RS02855	RHE_RS06555							RHE_RS17430	16	3583906	3584508	D	24298917	-	RHE_RS17430	WP_011426636.1	200	COG1309	K	TetR/AcrR family transcriptional regulator	3349		RHE_RS05085	11	1055570	1055845	R	24298146	-	RHE_RS05085	WP_042118024.1	91			hypothetical protein	978
RHE_RS16420	R	RHE_RS00185_m4	R	-136	-109	TTTGAAATTCTTCACACAAATTTAAACG	10.0	3.6e-06	-12535	5444		RHE_RS02890	RHE_RS06580							RHE_RS14175	16	2886372	2887064	D	24297801	-	RHE_RS14175	WP_011426016.1	230	COG0789	K	MerR family DNA-binding transcriptional regulator	2727		RHE_RS02165	11	442766	443131	D	24300565	-	RHE_RS02165	WP_042117808.1	121	COG0640	K	ArsR family transcriptional regulator	414
RHE_RS17050	D	RHE_RS00185_m4	D	-159	-132	ACAGAGAAATGGAAAAATTATTTAATAA	9.3	6.3e-06	-11975	5201		RHE_RS02975	RHE_RS06620							RHE_RS06025	16	1226740	1227255	R	24299352	-	RHE_RS06025	WP_011424514.1	171	COG1846	K	MarR family transcriptional regulator	1153		RHE_RS01720	11	350268	350945	R	24299399	-	RHE_RS01720	WP_011423724.1	225	COG2186	K	FadR family transcriptional regulator	325
RHE_RS18365	D	RHE_RS00185_m4	D	-107	-80	TGGAAAAATTAGCCGATTCGTTAAAATT	8.9	8.6e-06	-11664	5066		RHE_RS03000	RHE_RS06705							RHE_RS04655	16	975113	975997	D	24299187	-	RHE_RS04655	WP_011424272.1	294	COG0583	K	LysR family transcriptional regulator	893		RHE_RS00765	11	163227	163643	R	24301033	-	RHE_RS00765	WP_011423544.1	138	COG1846	K	MULTISPECIES: MarR family transcriptional regulator	143
RHE_RS20490	D	RHE_RS00185_m4	D	-55	-28	TCTTAAAAGTTTATGCACGTTTTATATC	10.6	2.2e-06	-13027	5658		RHE_RS03040	RHE_RS06825							RHE_RS02765	16	563154	563654	R	24301081	-	RHE_RS02765	WP_004672867.1	166	COG1959	K	MULTISPECIES: Rrf2 family transcriptional regulator	526		RHE_RS00415	11	88137	88814	R	24298097	-	RHE_RS00415	WP_011423478.1	225	COG1309	K	TetR/AcrR family transcriptional regulator	74
RHE_RS22155	R	RHE_RS00185_m4	R	-161	-134	GTAAAAATTATCTGATTGTTTTAATTAT	10.1	3.4e-06	-12592	5469		RHE_RS03045	RHE_RS06845							RHE_RS00340	16	70995	71777	D	24301178	-	RHE_RS00340	WP_011423463.1	260	COG2197	TK	DNA-binding response regulator	59		RHE_RS32675	10	251180	251686	R	30584687	-	RHE_RS32675	WP_004671987.1	168	COG1396	K	MULTISPECIES: XRE family transcriptional regulator	5881
RHE_RS22155	R	RHE_RS00185_m4	R	-160	-133	GGTAAAAATTATCTGATTGTTTTAATTA	14.0	9.3e-08	-16191	7032		RHE_RS03110	RHE_RS06875							RHE_RS29975	15	125893	126582	D	24297251	-	RHE_RS29975	WP_004673291.1	229	COG1802	K	MULTISPECIES: GntR family transcriptional regulator	5771		RHE_RS31110	10	357046	357501	D	24297164	-	RHE_RS31110	WP_018247122.1	151	COG5490	S	MULTISPECIES: phasin	5981
RHE_RS23690	R	RHE_RS00185_m4	R	-106	-79	TATAAATTTAATAGAGAAACTTTATTCC	9.3	6.3e-06	-11975	5201		RHE_RS03145	RHE_RS06955							RHE_RS29775	15	76014	76511	R	24297264	-	RHE_RS29775	WP_029875506.1	165			MULTISPECIES: XRE family transcriptional regulator	5733		RHE_RS30310	10	197765	198676	D	24297450	-	RHE_RS30310	WP_042120104.1	303	COG0583	K	MULTISPECIES: LysR family transcriptional regulator	5834
RHE_RS24615	R	RHE_RS00185_m4	R	-190	-163	TAAAAAATATGCATAGCCTATAAAATTG	9.4	5.8e-06	-12058	5237		RHE_RS03170	RHE_RS07105							RHE_RS29195	15	594574	595299	D	24302804	-	RHE_RS29195	WP_011428833.1	241	COG0745	TK	DNA-binding response regulator	5619		RHE_RS30305	10	196857	197522	R	24297454	-	RHE_RS30305	WP_016737469.1	221	COG4215	E	MULTISPECIES: ABC transporter	5833
RHE_RS24615	R	RHE_RS00185_m4	R	-189	-162	TTAAAAAATATGCATAGCCTATAAAATT	13.4	1.9e-07	-15476	6721		RHE_RS03175	RHE_RS07110							RHE_RS28725	15	493583	493927	D	24302898	-	RHE_RS28725	WP_011428746.1	114			transcriptional regulator	5529		RHE_RS29845	10	94684	95568	D	24297379	-	RHE_RS29845	WP_011053340.1	294	COG2084	I	MULTISPECIES: NAD(P)-dependent oxidoreductase	5747
RHE_RS24615	R	RHE_RS00185_m4	R	-188	-161	ATTAAAAAATATGCATAGCCTATAAAAT	12.2	5.5e-07	-14413	6260		RHE_RS03180	RHE_RS07210							RHE_RS28710	15	491401	491865	D	24302901	-	RHE_RS28710	WP_011428743.1	154	COG1522	K	Lrp/AsnC family transcriptional regulator	5526		RHE_RS29830	10	89657	92047	D	24297133	-	RHE_RS29830	WP_011053336.1	796	COG3243	I	MULTISPECIES: DUF3141 domain-containing protein	5744
RHE_RS24620	D	RHE_RS00185_m4	D	-183	-156	ATTAAAAAATATGCATAGCCTATAAAAT	12.2	5.5e-07	-14413	6260		RHE_RS03210	RHE_RS07480							RHE_RS28450	15	439096	439983	R	24302953	-	RHE_RS28450	WP_011428693.1	295	COG0583	K	LysR family transcriptional regulator	5476		RHE_RS26870	10	87161	87634	D	24303269	-	RHE_RS26870	WP_011428396.1	157	COG4119	FR	NUDIX domain-containing protein	5163
RHE_RS24620	D	RHE_RS00185_m4	D	-182	-155	TTAAAAAATATGCATAGCCTATAAAATT	13.4	1.9e-07	-15476	6721		RHE_RS03275	RHE_RS07685							RHE_RS27525	15	222246	223259	D	24303138	-	RHE_RS27525	WP_011428519.1	337	COG1609	K	LacI family DNA-binding transcriptional regulator	5294		RHE_RS25905	10	398760	399902	R	24302382	-	RHE_RS25905	WP_011428215.1	380	COG2207	K	AraC family transcriptional regulator	4972
RHE_RS24620	D	RHE_RS00185_m4	D	-181	-154	TAAAAAATATGCATAGCCTATAAAATTG	9.4	5.8e-06	-12058	5237		RHE_RS03330	RHE_RS07835							RHE_RS27415	15	199438	199935	D	24303160	-	RHE_RS27415	WP_011428497.1	165	COG1522	K	Lrp/AsnC family transcriptional regulator	5272		RHE_RS25540	10	325094	325906	R	24302455	-	RHE_RS25540	WP_011428144.1	270	COG1349	KG	MULTISPECIES: DeoR/GlpR transcriptional regulator	4899
RHE_RS00185	R	RHE_RS00185_m5	R	-205	-178	TTAAAAAGAACGAAACAAATTTAAATCG	9.0	7.8e-06	-11761	5108		RHE_RS03430	RHE_RS07925							RHE_RS26875	15	87772	88770	R	24303268	-	RHE_RS26875	WP_073990435.1	332	COG1609	K	LacI family DNA-binding transcriptional regulator	5164		RHE_RS21555	10	105601	106554	D	24301781	-	RHE_RS21555	WP_011427388.1	317			MULTISPECIES: hypothetical protein	4136
RHE_RS00185	R	RHE_RS00185_m5	R	-204	-177	TTTAAAAAGAACGAAACAAATTTAAATC	15.6	1.8e-08	-17833	7745		RHE_RS03465	RHE_RS08025							RHE_RS26720	15	61512	62237	D	24303299	-	RHE_RS26720	WP_011428372.1	241	COG0664	T	Crp/Fnr family transcriptional regulator	5134		RHE_RS20950	10	4342140	4343894	R	24298253	-	RHE_RS20950	WP_011427280.1	584	COG1785	PR	alkaline phosphatase	4040
RHE_RS00185	R	RHE_RS00185_m5	R	-203	-176	ATTTAAAAAGAACGAAACAAATTTAAAT	10.2	3.1e-06	-12684	5509		RHE_RS03515	RHE_RS08350							RHE_RS26695	15	57722	58231	R	24303304	-	RHE_RS26695	WP_086005055.1	169	COG1595	K	RNA polymerase subunit sigma-70	5129		RHE_RS18795	10	3890006	3890860	D	24300242	-	RHE_RS18795	WP_011426888.1	284	COG1737	K	MULTISPECIES: MurR/RpiR family transcriptional regulator	3620
RHE_RS00340	D	RHE_RS00185_m5	D	-125	-98	ATTAACATAATTAAGAAATGTCTAAAGA	9.1	6.8e-06	-11899	5167		RHE_RS03575	RHE_RS08760							RHE_RS26680	15	54673	55200	D	24303307	-	RHE_RS26680	WP_011428363.1	175	COG1595	K	RNA polymerase sigma factor	5126		RHE_RS18650	10	3860249	3861280	D	24297893	-	RHE_RS18650	WP_011426860.1	343	COG1609	K	LacI family transcriptional regulator	3591
RHE_RS04650	R	RHE_RS00185_m5	R	-117	-90	TGTGAAAACTGTTAGAATAATTTACATG	8.7	9.1e-06	-11607	5041		RHE_RS03595	RHE_RS08785							RHE_RS26355	15	492450	493478	D	24302292	-	RHE_RS26355	WP_011428300.1	342	COG1879	G	MULTISPECIES: LacI family DNA-binding transcriptional regulator	5062		RHE_RS16330	10	3350659	3351639	D	24301576	-	RHE_RS16330	WP_011426426.1	326	COG0451	M	NAD(P)-dependent oxidoreductase	3141
RHE_RS04655	D	RHE_RS00185_m5	D	-94	-67	TGTGAAAACTGTTAGAATAATTTACATG	8.7	9.1e-06	-11607	5041		RHE_RS03610	RHE_RS08920							RHE_RS26015	15	418354	418980	R	24302360	-	RHE_RS26015	WP_011428233.1	208	COG1309	K	TetR/AcrR family transcriptional regulator	4993		RHE_RS16100	10	3296911	3300312	R	24299341	-	RHE_RS16100	WP_011426382.1	1133	COG0784	T	hybrid sensor histidine kinase/response regulator	3097
RHE_RS06635	R	RHE_RS00185_m5	R	-120	-93	GGTAAAAATCCGTTAACTATTTATATTT	9.9	3.6e-06	-12535	5444		RHE_RS03645	RHE_RS08925							RHE_RS23775	15	197007	197912	D	24302094	-	RHE_RS23775	WP_011427811.1	301	COG0583	K	LysR family transcriptional regulator	4556		RHE_RS15405	10	3152452	3152943	R	24300518	-	RHE_RS15405	WP_020921896.1	163	COG1846	K	MarR family transcriptional regulator	2965
RHE_RS06680	D	RHE_RS00185_m5	D	-153	-126	GTAATGAATATTCCGTAATATTCAAATT	10.0	3.4e-06	-12592	5469		RHE_RS03720	RHE_RS09015							RHE_RS23055	15	38022	39080	D	24302238	-	RHE_RS23055	WP_011427668.1	352	COG1609	K	LacI family transcriptional regulator	4414		RHE_RS15180	10	3106928	3108160	R	24300460	-	RHE_RS15180	WP_011426211.1	410	COG4277	R	putative DNA modification/repair radical SAM protein	2923
RHE_RS11360	D	RHE_RS00185_m5	D	-241	-214	CATTACCAAAAGTTAACAATTTCCAATT	8.8	9.1e-06	-11607	5041		RHE_RS03750	RHE_RS09025							RHE_RS22190	15	41536	42300	D	24302004	-	RHE_RS22190	WP_011427504.1	254	COG2186	K	MULTISPECIES: FadR family transcriptional regulator	4248		RHE_RS12420	10	2540806	2541981	R	24300306	ssuD	RHE_RS12420	WP_011425689.1	391	COG2141	HR	alkanesulfonate monooxygenase, FMNH(2)-dependent	2399
RHE_RS12585	D	RHE_RS00185_m5	D	-265	-238	AATGAAATGTAATAATCATTTTCAAATT	10.5	2.2e-06	-13027	5658		RHE_RS03770	RHE_RS09045							RHE_RS17200	15	3535166	3535630	R	24298572	-	RHE_RS17200	WP_011426596.1	154	COG1959	K	Rrf2 family transcriptional regulator	3311		RHE_RS11960	10	2447075	2447635	D	24299207	-	RHE_RS11960	WP_011425600.1	186	COG1335	HR	cysteine hydrolase	2313
RHE_RS13735	R	RHE_RS00185_m5	R	-397	-370	AAAAAAATCTGGAAAACACTTTTAAATT	14.3	6.6e-08	-16534	7180		RHE_RS03775	RHE_RS09080							RHE_RS15925	15	3261738	3262313	D	24301339	-	RHE_RS15925	WP_011426350.1	191	COG1695	K	PadR family transcriptional regulator	3063		RHE_RS10510	10	2143863	2145062	R	24301073	-	RHE_RS10510	WP_011425320.1	399	COG1846	K	ROK family transcriptional regulator	2027
RHE_RS13735	R	RHE_RS00185_m5	R	-396	-369	GAAAAAAATCTGGAAAACACTTTTAAAT	12.5	4.3e-07	-14659	6367		RHE_RS03915	RHE_RS09130							RHE_RS03515	15	713141	714169	R	24297618	-	RHE_RS03515	WP_011424059.1	342	COG1609	K	LacI family transcriptional regulator	673		RHE_RS09130	10	1874391	1875395	R	24297582	-	RHE_RS09130	WP_011425078.1	334	COG1609	K	LacI family DNA-binding transcriptional regulator	1759
RHE_RS14170	R	RHE_RS00185_m5	R	-274	-247	AAAGAGATTATTTTTAGCACTTATAAAA	9.0	7.3e-06	-11828	5137		RHE_RS03950	RHE_RS09445							RHE_RS01660	15	333968	334432	D	24300225	-	RHE_RS01660	WP_011423712.1	154	COG1522	K	Lrp/AsnC family transcriptional regulator	314		RHE_RS06405	10	1301853	1302284	D	24300714	-	RHE_RS06405	WP_011424588.1	143	COG4957	K	MULTISPECIES: transcriptional regulator	1230
RHE_RS14175	D	RHE_RS00185_m5	D	-189	-162	AAAGAGATTATTTTTAGCACTTATAAAA	9.0	7.3e-06	-11828	5137		RHE_RS03990	RHE_RS10220							RHE_RS00765	15	163227	163643	R	24301033	-	RHE_RS00765	WP_011423544.1	138	COG1846	K	MULTISPECIES: MarR family transcriptional regulator	143		RHE_RS06210	10	1263611	1265185	R	24299153	-	RHE_RS06210	WP_011424551.1	524	COG1129	G	D-ribose transporter ATP-binding protein	1191
RHE_RS16040	D	RHE_RS00185_m5	D	-45	-18	CATAAACAAAGGTTGTATTTTTTTATAT	9.3	5.8e-06	-12058	5237		RHE_RS04010	RHE_RS10425							RHE_RS29840	14	93689	94369	D	24297393	-	RHE_RS29840	WP_004668612.1	226	COG1802	K	MULTISPECIES: GntR family transcriptional regulator	5746		RHE_RS05790	10	1186036	1186482	D	24297560	-	RHE_RS05790	WP_011424474.1	148	COG1959	K	Rrf2 family transcriptional regulator	1110
RHE_RS16040	D	RHE_RS00185_m5	D	-44	-17	ATAAACAAAGGTTGTATTTTTTTATATT	12.1	5.7e-07	-14378	6244		RHE_RS04025	RHE_RS10445							RHE_RS28695	14	487756	488760	R	24302904	-	RHE_RS28695	WP_011428740.1	334	COG2207	K	AraC family transcriptional regulator	5523		RHE_RS05255	10	1086690	1087337	R	24300250	-	RHE_RS05255	WP_011424377.1	215	COG1974	KT	transcriptional regulator	1010
RHE_RS16420	R	RHE_RS00185_m5	R	-136	-109	TTTGAAATTCTTCACACAAATTTAAACG	9.9	3.6e-06	-12535	5444		RHE_RS04030	RHE_RS10485							RHE_RS28020	14	344627	345355	D	24303039	-	RHE_RS28020	WP_020919624.1	242	COG2186	K	FadR family transcriptional regulator	5391		RHE_RS03610	10	738061	739470	D	24301590	-	RHE_RS03610	WP_011424076.1	469	COG1396	K	XRE family transcriptional regulator	692
RHE_RS17050	D	RHE_RS00185_m5	D	-159	-132	ACAGAGAAATGGAAAAATTATTTAATAA	11.1	1.4e-06	-13479	5854		RHE_RS04040	RHE_RS10510							RHE_RS27920	14	319840	320472	D	24303059	-	RHE_RS27920	WP_011428594.1	210	COG1309	K	TetR/AcrR family transcriptional regulator	5372		RHE_RS02330	10	470875	472416	R	24299114	-	RHE_RS02330	WP_011423837.1	513	COG5001	T	GGDEF-domain containing protein	443
RHE_RS17050	D	RHE_RS00185_m5	D	-150	-123	TGGAAAAATTATTTAATAAATTCGATAC	9.8	4.3e-06	-12357	5367		RHE_RS04105	RHE_RS10545							RHE_RS27185	14	152553	153446	D	24303206	-	RHE_RS27185	WP_042119981.1	297	COG0583	K	LysR family transcriptional regulator	5227		RHE_RS31105	9	355372	356145	R	24297158	-	RHE_RS31105	WP_004677031.1	257	COG0580	G	MULTISPECIES: aquaporin	5980
RHE_RS17200	R	RHE_RS00185_m5	R	-99	-72	ATACAACAAAATAGCTAATATTTATAGC	8.7	9.1e-06	-11607	5041		RHE_RS04115	RHE_RS10580							RHE_RS26280	14	477117	477902	D	24302307	-	RHE_RS26280	WP_011428285.1	261	COG1414	K	IclR family transcriptional regulator	5047		RHE_RS29835	9	92757	93092	R	24297156	-	RHE_RS29835	WP_026188835.1	111	COG1813	J	MULTISPECIES: XRE family transcriptional regulator	5745
RHE_RS18970	D	RHE_RS00185_m5	D	-101	-74	AGGATAATGAGGCGTTAAAATTTAAAAC	8.7	9.1e-06	-11607	5041		RHE_RS04155	RHE_RS10640							RHE_RS22460	14	101810	102604	R	24301950	-	RHE_RS22460	WP_011427553.1	264	COG2197	TK	LuxR family transcriptional regulator	4298		RHE_RS28890	9	535918	536547	D	24302865	-	RHE_RS28890	WP_042120018.1	209	COG1309	K	TetR family transcriptional regulator	5562
RHE_RS20490	D	RHE_RS00185_m5	D	-55	-28	TCTTAAAAGTTTATGCACGTTTTATATC	9.4	5.4e-06	-12129	5268		RHE_RS04225	RHE_RS10890							RHE_RS22020	14	5454	6176	D	24302038	-	RHE_RS22020	WP_011427471.1	240	COG1802	K	GntR family transcriptional regulator	4215		RHE_RS28340	9	415548	416246	D	24302975	-	RHE_RS28340	WP_011428673.1	232	COG1802	K	GntR family transcriptional regulator	5454
RHE_RS22155	R	RHE_RS00185_m5	R	-160	-133	GGTAAAAATTATCTGATTGTTTTAATTA	13.9	1.0e-07	-16118	7000		RHE_RS04265	RHE_RS10960							RHE_RS20710	14	4293842	4294750	R	24299916	-	RHE_RS20710	WP_011427238.1	302	COG0583	K	LysR family transcriptional regulator	3995		RHE_RS27315	9	179435	180067	D	24303180	-	RHE_RS27315	WP_011428478.1	210			EF-hand domain-containing protein	5254
RHE_RS24615	R	RHE_RS00185_m5	R	-188	-161	ATTAAAAAATATGCATAGCCTATAAAAT	9.2	6.3e-06	-11975	5201		RHE_RS04310	RHE_RS11075							RHE_RS19425	14	4026829	4027188	R	24300902	-	RHE_RS19425	WP_010028815.1	119	COG2204	T	MULTISPECIES: response regulator	3738		RHE_RS27310	9	178626	179273	R	24303181	-	RHE_RS27310	WP_011428477.1	215	COG1309	K	TetR/AcrR family transcriptional regulator	5253
RHE_RS24615	R	RHE_RS00185_m5	R	-169	-142	AATTTCATCTTGAAATAAGATTAAAAAA	9.6	4.6e-06	-12289	5337		RHE_RS04315	RHE_RS11340							RHE_RS18665	14	3864321	3865343	R	24297548	-	RHE_RS18665	WP_011426863.1	340	COG1879	G	LacI family DNA-binding transcriptional regulator	3594		RHE_RS27240	9	165065	165433	R	24303195	-	RHE_RS27240	WP_011428463.1	122	COG1733	K	transcriptional regulator	5239
RHE_RS24620	D	RHE_RS00185_m5	D	-202	-175	AATTTCATCTTGAAATAAGATTAAAAAA	9.6	4.6e-06	-12289	5337		RHE_RS04340	RHE_RS11690							RHE_RS18340	14	3783396	3784073	D	24298546	-	RHE_RS18340	WP_011426802.1	225	COG0745	TK	DNA-binding response regulator	3530		RHE_RS25695	9	355440	355946	D	24302424	-	RHE_RS25695	WP_011428173.1	168			hypothetical protein	4930
RHE_RS24620	D	RHE_RS00185_m5	D	-183	-156	ATTAAAAAATATGCATAGCCTATAAAAT	9.2	6.3e-06	-11975	5201		RHE_RS04490	RHE_RS11740							RHE_RS16415	14	3370721	3371146	R	24301505	-	RHE_RS16415	WP_011426443.1	141	COG1396	K	XRE family transcriptional regulator	3157		RHE_RS25185	9	256924	257913	D	24302526	-	RHE_RS25185	WP_082239851.1	329	COG0583	K	LysR family transcriptional regulator	4832
RHE_RS24660	D	RHE_RS00185_m5	D	-74	-47	TTTTACAGTCAGGGGAATATTTTTATTT	9.0	7.8e-06	-11761	5108		RHE_RS04545	RHE_RS11860							RHE_RS14100	14	2868014	2869018	D	24298805	-	RHE_RS14100	WP_011426001.1	334	COG2390	K	sugar-binding transcriptional regulator	2712		RHE_RS25180	9	256275	256757	R	24302527	-	RHE_RS25180	WP_011428078.1	160	COG4950	S	hypothetical protein	4831
RHE_RS18525	R	RHE_RS00285_m1	R	-71	-59	TCTCGTCATAAAC	8.8	9.7e-06	-11543	5013		RHE_RS04550	RHE_RS12035							RHE_RS13180	14	2688116	2688787	R	24300930	-	RHE_RS13180	WP_011425829.1	223	COG0745	TK	DNA-binding response regulator	2542		RHE_RS25060	9	234917	235675	R	24302551	-	RHE_RS25060	WP_011428054.1	252	COG1414	K	IclR family transcriptional regulator	4808
RHE_RS29445	R	RHE_RS00285_m2	R	-47	-30	TAGTTTGTACAGATAAGG	12.1	6.1e-07	-14310	6215		RHE_RS04555	RHE_RS12060							RHE_RS12585	14	2575379	2576422	D	24299650	-	RHE_RS12585	WP_020921520.1	347	COG1609	K	MULTISPECIES: LacI family DNA-binding transcriptional regulator	2429		RHE_RS24110	9	22944	23981	R	24302741	-	RHE_RS24110	WP_011427876.1	345	COG1609	K	LacI family transcriptional regulator	4621
RHE_RS05255	R	RHE_RS00285_m3	R	-26	-9	AATTATACCCTAAAAAAA	9.6	9.4e-06	-11575	5027		RHE_RS04575	RHE_RS12065							RHE_RS10425	14	2128648	2129160	D	24300520	-	RHE_RS10425	WP_011425303.1	170	COG1846	K	MarR family transcriptional regulator	2010		RHE_RS23105	9	48011	48904	R	24302228	-	RHE_RS23105	WP_011427679.1	297	COG0492	O	NAD(P)/FAD-dependent oxidoreductase	4422
RHE_RS16205	D	RHE_RS00285_m3	D	-56	-39	GTATATCGTTAAAAAGTA	10.1	5.3e-06	-12148	5276		RHE_RS04625	RHE_RS12205							RHE_RS06825	14	1392332	1393198	R	24297694	-	RHE_RS06825	WP_011424674.1	288	COG0583	K	LysR family transcriptional regulator	1314		RHE_RS20460	9	4235959	4236714	D	24301195	-	RHE_RS20460	WP_011427189.1	251	COG2197	TK	LuxR family transcriptional regulator	3944
RHE_RS27170	R	RHE_RS00285_m3	R	-99	-82	ATTAGTAGGCACAAAGCA	10.8	2.6e-06	-12860	5585		RHE_RS04645	RHE_RS12325							RHE_RS06535	14	1325425	1326318	R	24298369	-	RHE_RS06535	WP_011424616.1	297	COG0583	K	LysR family transcriptional regulator	1255		RHE_RS16435	9	3373935	3375008	D	24298411	-	RHE_RS16435	WP_011426446.1	357	COG3693	G	endo-1,4-beta-xylanase	3160
RHE_RS00285	R	RHE_RS00285_m5	R	-44	-33	TCTTGGTCAACC	11.2	6.7e-07	-14216	6174		RHE_RS04650	RHE_RS12415							RHE_RS04575	14	957245	957694	D	24298570	-	RHE_RS04575	WP_011424256.1	149	COG1733	K	transcriptional regulator	877		RHE_RS15755	9	3225725	3226450	D	24300784	-	RHE_RS15755	WP_011426316.1	241	COG2197	TK	LuxR family transcriptional regulator	3030
RHE_RS00340	D	RHE_RS00340_m1	D	-298	-285	AAAAATATTACAAT	13.3	2.2e-07	-15330	6658		RHE_RS04655	RHE_RS12520							RHE_RS03610	14	738061	739470	D	24301590	-	RHE_RS03610	WP_011424076.1	469	COG1396	K	XRE family transcriptional regulator	692		RHE_RS15700	9	3211618	3212379	D	24301567	-	RHE_RS15700	WP_011426307.1	253	COG3416	S	DUF2076 domain-containing protein	3021
RHE_RS00340	D	RHE_RS00340_m1	D	-278	-265	TGAAATATTACATT	11.7	1.4e-06	-13479	5854		RHE_RS04700	RHE_RS12585							RHE_RS03000	14	612592	613485	D	24300061	-	RHE_RS03000	WP_011423958.1	297	COG0583	K	LysR family transcriptional regulator	570		RHE_RS13735	9	2796471	2797568	R	24300622	-	RHE_RS13735	WP_011425933.1	365	COG2114	T	adenylate/guanylate cyclase domain-containing protein	2642
RHE_RS00340	D	RHE_RS00340_m1	D	-242	-229	GGAAATATAACCTG	11.0	2.3e-06	-12983	5638		RHE_RS04705	RHE_RS12620							RHE_RS02400	14	485703	486356	D	24298555	-	RHE_RS02400	WP_011423851.1	217	COG1309	K	TetR/AcrR family transcriptional regulator	456		RHE_RS13115	9	2675332	2675718	D	24301248	-	RHE_RS13115	WP_011425817.1	128	COG0456	J	N-acetyltransferase	2529
RHE_RS00340	D	RHE_RS00340_m1	D	-211	-198	AAAAATACAACCGA	12.1	9.6e-07	-13856	6018		RHE_RS04970	RHE_RS12670							RHE_RS02340	14	473887	474468	R	24300385	-	RHE_RS02340	WP_011423839.1	193			TetR/AcrR family transcriptional regulator	445		RHE_RS12330	9	2525583	2526635	R	24299426	-	RHE_RS12330	WP_011425671.1	350	COG0596	HR	alpha/beta hydrolase	2381
RHE_RS00725	D	RHE_RS00340_m1	D	-231	-218	AAAAATACAACCGC	10.2	4.9e-06	-12226	5310		RHE_RS04985	RHE_RS12775							RHE_RS02310	14	467262	467843	R	24300304	-	RHE_RS02310	WP_011423833.1	193	COG1309	K	TetR/AcrR family transcriptional regulator	439		RHE_RS11360	9	2325041	2325409	D	24300015	-	RHE_RS11360	WP_011425483.1	122			hypothetical protein	2195
RHE_RS02765	R	RHE_RS00340_m1	R	-39	-26	TAAAATATATCCAT	10.0	5.9e-06	-12041	5229		RHE_RS04995	RHE_RS12915							RHE_RS01480	14	299944	300798	D	24301029	-	RHE_RS01480	WP_011423676.1	284	COG2207	K	AraC family transcriptional regulator	280		RHE_RS10220	9	2081072	2085139	D	24298335	-	RHE_RS10220	WP_042118412.1	1355			XRE family transcriptional regulator	1969
RHE_RS16970	R	RHE_RS00340_m1	R	-82	-69	AAAAATATTACTGT	11.9	1.1e-06	-13720	5959		RHE_RS05000	RHE_RS12920							RHE_RS00725	14	150848	151213	D	24301150	-	RHE_RS00725	WP_011423536.1	121	COG1476	K	XRE family transcriptional regulator	135		RHE_RS09265	9	1897954	1899201	D	24301126	-	RHE_RS09265	WP_011425102.1	415	COG2067	I	transporter	1785
RHE_RS22145	R	RHE_RS00340_m1	R	-151	-138	ACAAATATTACTTT	11.7	1.3e-06	-13553	5886		RHE_RS05020	RHE_RS12940							RHE_RS30310	13	197765	198676	D	24297450	-	RHE_RS30310	WP_042120104.1	303	COG0583	K	MULTISPECIES: LysR family transcriptional regulator	5834		RHE_RS07925	9	1630357	1631538	R	24298690	-	RHE_RS07925	WP_011424880.1	393	COG1846	K	ROK family transcriptional regulator	1531
RHE_RS00340	D	RHE_RS00340_m2	D	-242	-221	GGAAATATAACCTGGAAGTACC	18.1	1.4e-09	-20387	8854		RHE_RS05085	RHE_RS12990							RHE_RS29075	13	572421	573152	D	24302828	-	RHE_RS29075	WP_011428811.1	243	COG0664	T	nitrogen fixation transcriptional regulator protein	5595		RHE_RS06875	9	1403628	1404503	R	24299772	-	RHE_RS06875	WP_020920841.1	291	COG1737	K	MurR/RpiR family transcriptional regulator	1324
RHE_RS00340	D	RHE_RS00340_m2	D	-211	-190	AAAAATACAACCGACACGTAGT	13.4	1.5e-07	-15713	6824		RHE_RS05110	RHE_RS13060							RHE_RS27930	13	321663	322691	R	24303057	-	RHE_RS27930	WP_041679322.1	342	COG4977	K	AraC family transcriptional regulator	5374		RHE_RS06820	9	1391832	1392278	D	24297994	-	RHE_RS06820	WP_011424673.1	148	COG5622	M	host attachment protein	1313
RHE_RS03180	D	RHE_RS00340_m2	D	-197	-176	AGAACTACTGCCCCTCAGTATA	8.2	6.7e-06	-11913	5174		RHE_RS05140	RHE_RS13180							RHE_RS27240	13	165065	165433	R	24303195	-	RHE_RS27240	WP_011428463.1	122	COG1733	K	transcriptional regulator	5239		RHE_RS06215	9	1265346	1266380	D	24299033	-	RHE_RS06215	WP_042118128.1	344	COG1609	K	LacI family DNA-binding transcriptional regulator	1192
RHE_RS12760	D	RHE_RS00340_m2	D	-221	-200	TCGAATTCAATAATTTAGTACC	11.3	7.8e-07	-14064	6108		RHE_RS05170	RHE_RS13190							RHE_RS26795	13	73511	73915	D	24303284	-	RHE_RS26795	WP_011428383.1	134	COG0784	T	response regulator	5148		RHE_RS03430	9	697768	698439	D	24300610	-	RHE_RS03430	WP_011424043.1	223	COG0745	TK	DNA-binding response regulator	656
RHE_RS13340	R	RHE_RS00340_m2	R	-180	-159	AAGAATACAACTTACGAGAAGA	7.8	8.6e-06	-11664	5066		RHE_RS05255	RHE_RS13215							RHE_RS24540	13	117367	118077	D	24302655	-	RHE_RS24540	WP_029531946.1	236	COG1802	K	MULTISPECIES: GntR family transcriptional regulator	4708		RHE_RS02400	9	485703	486356	D	24298555	-	RHE_RS02400	WP_011423851.1	217	COG1309	K	TetR/AcrR family transcriptional regulator	456
RHE_RS28510	R	RHE_RS00340_m2	R	-87	-66	ACAATTGTGTACTTTGCGTACA	7.9	8.6e-06	-11664	5066		RHE_RS05265	RHE_RS13235							RHE_RS23945	13	231024	232037	R	24302060	-	RHE_RS23945	WP_041678980.1	337	COG1609	K	LacI family transcriptional regulator	4591		RHE_RS02395	9	485126	485608	R	24300123	-	RHE_RS02395	WP_011423850.1	160	COG5500	S	DUF1772 domain-containing protein	455
RHE_RS00340	D	RHE_RS00340_m3	D	-283	-266	TGTACTGAAATATTACAT	20.8	1.9e-12	-26989	11721		RHE_RS05300	RHE_RS13295							RHE_RS23520	13	142893	143678	R	24302145	-	RHE_RS23520	WP_011427760.1	261			XRE family transcriptional regulator	4504		RHE_RS00855	9	182424	183161	D	24298508	phnF	RHE_RS00855	WP_011423562.1	245	COG2188	K	phosphonate metabolism transcriptional regulator PhnF	161
RHE_RS06015	R	RHE_RS00340_m3	R	-97	-80	GTTAGTAAAACACTACCC	7.4	9.5e-06	-11564	5022		RHE_RS05315	RHE_RS13370							RHE_RS23180	13	65986	67062	R	24302213	-	RHE_RS23180	WP_011427693.1	358	COG2207	K	AraC family transcriptional regulator	4437		RHE_RS00850	9	181838	182314	R	24298509	phnG	RHE_RS00850	WP_011423561.1	158	COG3624	P	phosphonate C-P lyase system protein PhnG	160
RHE_RS06320	D	RHE_RS00340_m3	D	-168	-151	CGTACTTGATCTCTATAT	10.1	1.9e-06	-13174	5721		RHE_RS05330	RHE_RS13695							RHE_RS20825	13	4317621	4317998	R	24299475	-	RHE_RS20825	WP_011427257.1	125	COG2005	K	LysR family transcriptional regulator	4017		RHE_RS00725	9	150848	151213	D	24301150	-	RHE_RS00725	WP_011423536.1	121	COG1476	K	XRE family transcriptional regulator	135
RHE_RS24615	R	RHE_RS00340_m3	R	-289	-272	TATACTGAGATTTGACTT	8.4	5.2e-06	-12167	5284		RHE_RS05340	RHE_RS13750							RHE_RS20625	13	4274347	4275123	D	24297746	-	RHE_RS20625	WP_020922565.1	258	COG2188	K	GntR family transcriptional regulator	3978		RHE_RS30525	8	245029	246507	D	24297382	nifB	RHE_RS30525	WP_011053432.1	492	COG0535	R	MULTISPECIES: nitrogenase cofactor biosynthesis protein NifB	5875
RHE_RS24620	D	RHE_RS00340_m3	D	-72	-55	TATACTGAGATTTGACTT	8.4	5.2e-06	-12167	5284		RHE_RS05380	RHE_RS13770							RHE_RS19695	13	4080725	4081153	R	24298367	-	RHE_RS19695	WP_011427046.1	142	COG1522	K	MULTISPECIES: Lrp/AsnC family transcriptional regulator	3791		RHE_RS29840	8	93689	94369	D	24297393	-	RHE_RS29840	WP_004668612.1	226	COG1802	K	MULTISPECIES: GntR family transcriptional regulator	5746
RHE_RS32555	R	RHE_RS00340_m3	R	-326	-309	TATACGTTAATGCTATTC	7.8	7.5e-06	-11801	5125		RHE_RS05415	RHE_RS13800							RHE_RS18900	13	3915607	3916362	D	24298669	-	RHE_RS18900	WP_041678762.1	251	COG2186	K	FadR family transcriptional regulator	3641		RHE_RS29630	8	44177	45082	D	24297237	-	RHE_RS29630	WP_004674388.1	301	COG0583	K	MULTISPECIES: LysR family transcriptional regulator	5704
RHE_RS00340	D	RHE_RS00340_m4	D	-251	-231	ATAGTGGGAGGAAATATAACC	18.3	7.3e-10	-21038	9137		RHE_RS05420	RHE_RS14100							RHE_RS18560	13	3841280	3842173	D	24298320	-	RHE_RS18560	WP_020922298.1	297	COG0583	K	LysR family transcriptional regulator	3574		RHE_RS28900	8	537520	538443	D	24302863	-	RHE_RS28900	WP_011428781.1	307	COG0583	K	LysR family transcriptional regulator	5564
RHE_RS00340	D	RHE_RS00340_m5	D	-79	-50	AGGGCCGGCATTTCATACTATCTTATACCT	11.5	9.9e-07	-13826	6004		RHE_RS05425	RHE_RS14115							RHE_RS18135	13	3735539	3737080	R	24300386	-	RHE_RS18135	WP_011426766.1	513	COG2204	T	sigma-54-dependent Fis family transcriptional regulator	3489		RHE_RS28895	8	536505	537389	R	24302864	-	RHE_RS28895	WP_011428780.1	294	COG2267	I	hydrolase	5563
RHE_RS05415	R	RHE_RS00340_m5	R	-56	-27	CTGGTTGTCAATTCCGACTCTACATTACCA	10.7	2.0e-06	-13122	5699		RHE_RS05445	RHE_RS14135							RHE_RS14210	13	2892768	2893256	R	24301176	-	RHE_RS14210	WP_011426023.1	162	COG1959	K	Rrf2 family transcriptional regulator	2734		RHE_RS28165	8	374171	374482	D	24303010	-	RHE_RS28165	WP_011428640.1	103			hypothetical protein	5420
RHE_RS05420	D	RHE_RS00340_m5	D	-135	-106	CTGGTTGTCAATTCCGACTCTACATTACCA	10.7	2.0e-06	-13122	5699		RHE_RS05465	RHE_RS14150							RHE_RS14185	13	2888347	2889273	R	24298136	-	RHE_RS14185	WP_042118741.1	308	COG0583	K	LysR family transcriptional regulator	2729		RHE_RS28160	8	372951	373856	R	24303011	-	RHE_RS28160	WP_011428639.1	301	COG0583	K	LysR family transcriptional regulator	5419
RHE_RS05300	D	RHE_RS00415_m1	D	-142	-126	TAAGCACCTCCGCACGG	9.8	3.4e-06	-12592	5469		RHE_RS05495	RHE_RS14160							RHE_RS14150	13	2881565	2882188	D	24298299	-	RHE_RS14150	WP_011426011.1	207	COG1309	K	TetR/AcrR family transcriptional regulator	2722		RHE_RS28010	8	343261	344268	D	24303041	-	RHE_RS28010	WP_011428612.1	335	COG1609	K	LacI family transcriptional regulator	5390
RHE_RS26350	R	RHE_RS00415_m1	R	-19	-3	TATCCGCCTCCCTATGC	11.1	1.3e-06	-13553	5886		RHE_RS05555	RHE_RS14175							RHE_RS13295	13	2706372	2707193	R	24300892	-	RHE_RS13295	WP_011425847.1	273	COG2207	K	AraC family transcriptional regulator	2561		RHE_RS26695	8	57722	58231	R	24303304	-	RHE_RS26695	WP_086005055.1	169	COG1595	K	RNA polymerase subunit sigma-70	5129
RHE_RS26355	D	RHE_RS00415_m1	D	-131	-115	TATCCGCCTCCCTATGC	11.1	1.3e-06	-13553	5886		RHE_RS05560	RHE_RS14185							RHE_RS08920	13	1826503	1826964	D	24299005	-	RHE_RS08920	WP_011425036.1	153	COG1522	K	Lrp/AsnC family transcriptional regulator	1718		RHE_RS26635	8	44455	45159	D	24303316	-	RHE_RS26635	WP_011428354.1	234	COG2186	K	MULTISPECIES: transcriptional regulator NanR	5117
RHE_RS04645	D	RHE_RS00415_m2	D	-76	-64	TTTTGTTGCAATT	9.7	7.2e-06	-11841	5143		RHE_RS05640	RHE_RS14210							RHE_RS08350	13	1716074	1716445	D	24298451	-	RHE_RS08350	WP_003547430.1	123	COG0784	T	MULTISPECIES: response regulator	1610		RHE_RS24570	8	123928	125931	D	24302649	-	RHE_RS24570	WP_011427965.1	667	COG5001	T	GGDEF-domain containing protein	4714
RHE_RS06730	D	RHE_RS00415_m2	D	-16	-4	GTCTTTTACAAGT	10.0	5.6e-06	-12093	5252		RHE_RS05730	RHE_RS14355							RHE_RS07835	13	1613145	1613492	R	24297649	-	RHE_RS07835	WP_011424866.1	115	COG0784	T	response regulator	1517		RHE_RS23110	8	49113	49757	D	24302227	-	RHE_RS23110	WP_041678950.1	214	COG1309	K	TetR/AcrR family transcriptional regulator	4423
RHE_RS11900	R	RHE_RS00415_m2	R	-110	-98	ATCTGTTACAATT	10.2	4.9e-06	-12226	5310		RHE_RS05735	RHE_RS14605							RHE_RS06215	13	1265346	1266380	D	24299033	-	RHE_RS06215	WP_042118128.1	344	COG1609	K	LacI family DNA-binding transcriptional regulator	1192		RHE_RS22630	8	137545	139029	D	24301916	-	RHE_RS22630	WP_042119694.1	494	COG1129	G	sugar ABC transporter ATP-binding protein	4331
RHE_RS11905	D	RHE_RS00415_m2	D	-182	-170	ATCTGTTACAATT	10.2	4.9e-06	-12226	5310		RHE_RS05750	RHE_RS14770							RHE_RS04030	13	838153	839109	R	24299214	-	RHE_RS04030	WP_011424150.1	318	COG0583	K	LysR family transcriptional regulator	769		RHE_RS22625	8	136270	137316	R	24301917	-	RHE_RS22625	WP_011427586.1	348	COG1879	G	sugar ABC transporter substrate-binding protein	4330
RHE_RS26695	R	RHE_RS00415_m2	R	-313	-301	CTTGGTTACAAGC	10.4	4.2e-06	-12380	5377		RHE_RS05790	RHE_RS14875							RHE_RS02835	13	582782	583225	R	24301251	-	RHE_RS02835	WP_011423930.1	147	COG1846	K	MarR family transcriptional regulator	540		RHE_RS22610	8	132031	133368	R	24301920	-	RHE_RS22610	WP_011427583.1	445	COG2141	HR	FMN-dependent monooxygenase	4327
RHE_RS29775	R	RHE_RS00415_m2	R	-286	-274	ATTCTTTACAAGA	9.4	8.9e-06	-11629	5051		RHE_RS05815	RHE_RS14905							RHE_RS33140	12	313546	313737	D	31930227	-	RHE_RS33140	WP_004674400.1	63			MULTISPECIES: nitrogen fixation transcriptional regulator protein	5940		RHE_RS22395	8	86496	88022	R	24301963	-	RHE_RS22395	WP_011427541.1	508	COG1129	G	ribose import ATP-binding protein RbsA 2	4285
RHE_RS29780	D	RHE_RS00415_m2	D	-133	-121	ATTCTTTACAAGA	9.4	8.9e-06	-11629	5051		RHE_RS05850	RHE_RS14920							RHE_RS32675	12	251180	251686	R	30584687	-	RHE_RS32675	WP_004671987.1	168	COG1396	K	MULTISPECIES: XRE family transcriptional regulator	5881		RHE_RS18710	8	3875348	3876256	D	24298177	-	RHE_RS18710	WP_011426872.1	302	COG0583	K	LysR family transcriptional regulator	3603
RHE_RS00415	R	RHE_RS00415_m3	R	-208	-188	CTTGTAACCAATTAGTTATTT	24.5	4.2e-12	-26196	11377		RHE_RS05855	RHE_RS15040							RHE_RS31500	12	1259117	1259404	R	30584452	-	RHE_RS31500	WP_011424546.1	95			MurR/RpiR family transcriptional regulator	1186		RHE_RS17175	8	3526765	3528306	D	24298286	-	RHE_RS17175	WP_011426591.1	513	COG0025	P	sodium:proton antiporter	3306
RHE_RS02165	D	RHE_RS00415_m3	D	-104	-84	TAAGCAATTATCTAATTACTT	0.1	4.8e-06	-12247	5319		RHE_RS05915	RHE_RS15070							RHE_RS30095	12	151474	152439	D	24297343	-	RHE_RS30095	WP_008534397.1	321	COG2207	K	MULTISPECIES: AraC family transcriptional regulator	5794		RHE_RS17170	8	3526070	3526534	R	24297922	-	RHE_RS17170	WP_011426590.1	154	COG1846	K	MarR family transcriptional regulator	3305
RHE_RS05495	R	RHE_RS00415_m3	R	-38	-18	TATATAGCCAAATGGATATAT	7.1	2.3e-07	-15285	6638		RHE_RS05940	RHE_RS15090							RHE_RS27935	12	322860	324011	D	24303056	-	RHE_RS27935	WP_011428597.1	383	COG1846	K	ROK family transcriptional regulator	5375		RHE_RS16425	8	3372480	3373349	D	24301354	-	RHE_RS16425	WP_042118928.1	289			hypothetical protein	3159
RHE_RS05495	R	RHE_RS00415_m3	R	-22	-2	TGAATCACCATTTAGCTATAT	3.8	1.0e-06	-13816	6000		RHE_RS05945	RHE_RS15210							RHE_RS27195	12	154549	155310	D	24303204	-	RHE_RS27195	WP_011428454.1	253	COG0664	T	Crp/Fnr family transcriptional regulator	5229		RHE_RS15890	8	3254161	3254610	D	24301077	-	RHE_RS15890	WP_042119308.1	149	COG1846	K	MarR family transcriptional regulator	3056
RHE_RS06680	D	RHE_RS00415_m3	D	-188	-168	GCGATCACTAAGTGGTTATAA	4.7	6.9e-07	-14187	6161		RHE_RS05965	RHE_RS15225							RHE_RS26765	12	67085	67843	D	24303290	-	RHE_RS26765	WP_011428377.1	252	COG2186	K	FadR family transcriptional regulator	5142		RHE_RS15410	8	3153708	3154325	R	24298293	-	RHE_RS15410	WP_011426253.1	205	COG4991	S	MULTISPECIES: DUF1236 domain-containing protein	2966
RHE_RS09445	D	RHE_RS00415_m3	D	-39	-19	CTACTCACCGGTTGGTGACAG	0.5	4.2e-06	-12380	5377		RHE_RS05980	RHE_RS15405							RHE_RS25185	12	256924	257913	D	24302526	-	RHE_RS25185	WP_082239851.1	329	COG0583	K	LysR family transcriptional regulator	4832		RHE_RS15225	8	3118119	3118412	D	24300427	-	RHE_RS15225	WP_011426219.1	97	COG0640	K	transcriptional regulator	2932
RHE_RS11295	D	RHE_RS00415_m3	D	-87	-67	CAACTAAGCATTTAATTCTAT	1.0	3.3e-06	-12622	5481		RHE_RS06015	RHE_RS15555							RHE_RS24475	12	100394	101236	R	24302668	-	RHE_RS24475	WP_011427946.1	280	COG2207	K	AraC family transcriptional regulator	4695		RHE_RS14770	8	3021343	3022215	D	24298970	-	RHE_RS14770	WP_020921822.1	290	COG1737	K	MurR/RpiR family transcriptional regulator	2842
RHE_RS18680	D	RHE_RS00415_m3	D	-67	-47	TATAGAACCAATCGGTTCGAT	5.4	5.0e-07	-14509	6301		RHE_RS06025	RHE_RS15675							RHE_RS23835	12	208706	209776	R	24302082	-	RHE_RS23835	WP_042119774.1	356	COG1609	K	LacI family transcriptional regulator	4568		RHE_RS14765	8	3020400	3021173	R	24300215	-	RHE_RS14765	WP_042119283.1	257	COG3931	E	N-formylglutamate amidohydrolase	2841
RHE_RS22790	R	RHE_RS00415_m3	R	-178	-158	TTTGTATCTAAATAGTTATTT	14.8	4.1e-09	-19312	8387		RHE_RS06030	RHE_RS15755							RHE_RS22830	12	179736	180188	D	24301876	-	RHE_RS22830	WP_042119690.1	150	COG1396	K	transcriptional regulator	4370		RHE_RS14410	8	2937027	2938970	R	24301313	-	RHE_RS14410	WP_020921781.1	647	COG2766	T	PrkA family serine protein kinase	2771
RHE_RS22795	D	RHE_RS00415_m3	D	-206	-186	TTTGTATCTAAATAGTTATTT	14.8	4.1e-09	-19312	8387		RHE_RS06045	RHE_RS15890							RHE_RS20490	12	4243847	4244623	D	24300911	-	RHE_RS20490	WP_020922551.1	258	COG1349	KG	DeoR/GlpR transcriptional regulator	3950		RHE_RS14210	8	2892768	2893256	R	24301176	-	RHE_RS14210	WP_011426023.1	162	COG1959	K	Rrf2 family transcriptional regulator	2734
RHE_RS25455	R	RHE_RS00415_m3	R	-72	-52	TATCTAAACAATTCGTTGTTT	-1.1	7.9e-06	-11749	5102		RHE_RS06055	RHE_RS15925							RHE_RS18525	12	3833979	3834491	R	24298401	-	RHE_RS18525	WP_020922291.1	170	COG1846	K	MarR family transcriptional regulator	3567		RHE_RS14190	8	2889405	2889884	D	24298045	-	RHE_RS14190	WP_011426019.1	159	COG2128	P	carboxymuconolactone decarboxylase family protein	2730
RHE_RS25605	D	RHE_RS00415_m3	D	-25	-5	GTTGTTACCGATCGGTCACAT	-1.6	9.2e-06	-11596	5036		RHE_RS06065	RHE_RS15995							RHE_RS16825	12	3451545	3452195	R	24299420	-	RHE_RS16825	WP_011426523.1	216	COG1309	K	TetR family transcriptional regulator	3236		RHE_RS13800	8	2811162	2811746	R	24301118	-	RHE_RS13800	WP_011425946.1	194	COG1309	K	TetR/AcrR family transcriptional regulator	2656
RHE_RS33115	R	RHE_RS00415_m3	R	-76	-56	CAAATCATTAATTTGTCACTA	1.5	2.7e-06	-12822	5569		RHE_RS06095	RHE_RS16100							RHE_RS16340	12	3352684	3353586	R	24301342	-	RHE_RS16340	WP_011426428.1	300	COG0583	K	LysR family transcriptional regulator	3143		RHE_RS13255	8	2700449	2701225	D	24299994	-	RHE_RS13255	WP_042119260.1	258	COG3698	S	hypothetical protein	2554
RHE_RS03950	D	RHE_RS00415_m4	D	-179	-168	AGTGTCAAGCGC	9.2	6.6e-06	-11928	5180		RHE_RS06105	RHE_RS16120							RHE_RS16120	12	3303747	3304775	D	24298619	-	RHE_RS16120	WP_011426386.1	342	COG1609	K	LacI family DNA-binding transcriptional regulator	3101		RHE_RS12920	8	2636767	2638098	R	24298962	-	RHE_RS12920	WP_011425779.1	443	COG0745	TK	diguanylate cyclase response regulator	2492
RHE_RS10510	R	RHE_RS00415_m4	R	-97	-86	CCTGTCAAGCGC	12.0	1.1e-06	-13720	5959		RHE_RS06135	RHE_RS16135							RHE_RS15755	12	3225725	3226450	D	24300784	-	RHE_RS15755	WP_011426316.1	241	COG2197	TK	LuxR family transcriptional regulator	3030		RHE_RS12670	8	2590396	2591115	D	24301393	-	RHE_RS12670	WP_011425734.1	239	COG0664	T	Crp/Fnr family transcriptional regulator	2445
RHE_RS15240	D	RHE_RS00415_m4	D	-129	-118	CCTGTCAAGCAA	9.7	5.2e-06	-12167	5284		RHE_RS06160	RHE_RS16205							RHE_RS15405	12	3152452	3152943	R	24300518	-	RHE_RS15405	WP_020921896.1	163	COG1846	K	MarR family transcriptional regulator	2965		RHE_RS11595	8	2371104	2372186	D	24297611	-	RHE_RS11595	WP_011425529.1	360	COG0683	E	ABC transporter substrate-binding protein	2241
RHE_RS22145	R	RHE_RS00415_m4	R	-79	-68	AGTGTCAAGCGG	11.8	1.3e-06	-13553	5886		RHE_RS06175	RHE_RS16230							RHE_RS15090	12	3077615	3079672	R	24299446	-	RHE_RS15090	WP_011426193.1	685	COG0568	K	MULTISPECIES: RNA polymerase sigma factor RpoD	2905		RHE_RS10890	8	2228912	2229652	D	24299303	-	RHE_RS10890	WP_042118472.1	246	COG0745	TK	DNA-binding response regulator	2104
RHE_RS15155	R	RHE_RS00415_m5	R	-376	-347	GCTACACCCACAAACCTCAGCTAGGCAAAC	8.9	2.8e-06	-12786	5553		RHE_RS06210	RHE_RS16340							RHE_RS12920	12	2636767	2638098	R	24298962	-	RHE_RS12920	WP_011425779.1	443	COG0745	TK	diguanylate cyclase response regulator	2492		RHE_RS10885	8	2227684	2228676	R	24297715	-	RHE_RS10885	WP_011425393.1	330	COG1840	P	iron ABC transporter substrate-binding protein	2103
RHE_RS17815	R	RHE_RS00415_m5	R	-122	-93	GCTACCAACCCTGCCGTCTGCGCCTCAATC	8.8	3.0e-06	-12717	5523		RHE_RS06215	RHE_RS16415							RHE_RS10545	12	2151779	2152489	R	24297651	-	RHE_RS10545	WP_011425327.1	236	COG2186	K	FadR family transcriptional regulator	2035		RHE_RS10390	8	2121707	2123497	R	24299447	-	RHE_RS10390	WP_011425296.1	596	COG1132	V	ABC transporter ATP-binding protein	2002
RHE_RS30285	D	RHE_RS00415_m5	D	-83	-54	GTTACGAACTCCCCGATCAGTGGGTTGAGC	8.0	5.5e-06	-12111	5260		RHE_RS06260	RHE_RS16670							RHE_RS09130	12	1874391	1875395	R	24297582	-	RHE_RS09130	WP_011425078.1	334	COG1609	K	LacI family DNA-binding transcriptional regulator	1759		RHE_RS09670	8	1972383	1974485	R	24299110	-	RHE_RS09670	WP_011425174.1	700			RTX toxin	1859
RHE_RS27305	R	RHE_RS00725_m1	R	-152	-136	TAACGGAACTCTACAGT	8.2	4.1e-06	-12405	5387		RHE_RS06265	RHE_RS16760							RHE_RS07925	12	1630357	1631538	R	24298690	-	RHE_RS07925	WP_011424880.1	393	COG1846	K	ROK family transcriptional regulator	1531		RHE_RS09505	8	1946145	1946654	D	24300268	-	RHE_RS09505	WP_042118325.1	169	COG0456	J	N-acetyltransferase	1831
RHE_RS30520	D	RHE_RS00725_m1	D	-215	-199	CAACTCCACGATTCAGA	9.9	1.5e-06	-13410	5824		RHE_RS06280	RHE_RS16800							RHE_RS06845	12	1396358	1397197	R	24298848	-	RHE_RS06845	WP_020920836.1	279	COG2169	L	AraC family transcriptional regulator	1318		RHE_RS06635	8	1346845	1349148	R	24301203	-	RHE_RS06635	WP_011424636.1	767	COG2202	T	PAS domain-containing sensor histidine kinase	1275
RHE_RS04625	R	RHE_RS00725_m2	R	-52	-38	GTATACACAAACATT	10.7	3.4e-06	-12592	5469		RHE_RS06290	RHE_RS16815							RHE_RS06175	12	1257609	1258301	R	24298525	-	RHE_RS06175	WP_011424544.1	230	COG2378	K	YafY family transcriptional regulator	1184		RHE_RS05855	8	1198302	1199054	R	24300908	-	RHE_RS05855	WP_020920707.1	250	COG1349	KG	DeoR/GlpR transcriptional regulator	1122
RHE_RS15755	D	RHE_RS00725_m2	D	-172	-158	AGATACCACAACGCT	11.6	1.6e-06	-13346	5796		RHE_RS06320	RHE_RS16825							RHE_RS05855	12	1198302	1199054	R	24300908	-	RHE_RS05855	WP_020920707.1	250	COG1349	KG	DeoR/GlpR transcriptional regulator	1122		RHE_RS05495	8	1129379	1129708	R	24297494	-	RHE_RS05495	WP_011424419.1	109	COG0640	K	ArsR family transcriptional regulator	1055
RHE_RS22610	R	RHE_RS00725_m2	R	-224	-210	GCATAAGCAAACACT	10.2	5.0e-06	-12206	5301		RHE_RS06380	RHE_RS17050							RHE_RS04705	12	983275	984273	D	24300325	-	RHE_RS04705	WP_011424280.1	332	COG0583	K	LysR family transcriptional regulator	902		RHE_RS05315	8	1094963	1095646	R	24300376	-	RHE_RS05315	WP_042119188.1	227	COG0745	TK	DNA-binding response regulator	1022
RHE_RS00725	D	RHE_RS00725_m3	D	-115	-102	CTGACGTAACGTAA	12.8	3.4e-07	-14894	6469		RHE_RS06395	RHE_RS17090							RHE_RS03180	12	648955	649659	D	24300680	-	RHE_RS03180	WP_011423993.1	234	COG2197	TK	helix-turn-helix transcriptional regulator	606		RHE_RS03515	8	713141	714169	R	24297618	-	RHE_RS03515	WP_011424059.1	342	COG1609	K	LacI family transcriptional regulator	673
RHE_RS00765	R	RHE_RS00725_m3	R	-317	-304	GTCACGGTACGTTA	10.7	3.3e-06	-12622	5481		RHE_RS06405	RHE_RS17135							RHE_RS30745	11	285210	285884	R	24297464	-	RHE_RS30745	WP_029875595.1	224			MULTISPECIES: transcriptional regulator	5912		RHE_RS02800	8	570194	571117	R	24300499	-	RHE_RS02800	WP_011423923.1	307	COG0730	S	sulfite exporter TauE/SafE family protein	533
RHE_RS17050	D	RHE_RS00725_m3	D	-327	-314	GTAACCTTTCGTTT	9.6	8.7e-06	-11652	5060		RHE_RS06495	RHE_RS17145							RHE_RS29400	11	635310	636548	D	24302763	-	RHE_RS29400	WP_011428870.1	412	COG1846	K	ROK family transcriptional regulator	5660		RHE_RS02490	8	507657	508646	R	24298725	-	RHE_RS02490	WP_011423869.1	329	COG1879	G	ABC transporter substrate-binding protein	475
RHE_RS29795	R	RHE_RS00725_m3	R	-99	-86	TTTACGATACGGAA	9.7	8.0e-06	-11736	5097		RHE_RS06535	RHE_RS17170							RHE_RS29200	11	595866	598709	R	24302803	-	RHE_RS29200	WP_042120030.1	947	COG3710	K	LuxR family transcriptional regulator	5620		RHE_RS02385	8	483430	484608	D	24300125	-	RHE_RS02385	WP_011423848.1	392	COG3706	TK	GGDEF domain-containing protein	454
RHE_RS00340	D	RHE_RS00725_m4	D	-212	-198	CAAAAATACAACCGA	13.7	2.6e-07	-15163	6585		RHE_RS06555	RHE_RS17200							RHE_RS28890	11	535918	536547	D	24302865	-	RHE_RS28890	WP_042120018.1	209	COG1309	K	TetR family transcriptional regulator	5562		RHE_RS02355	8	476830	478077	R	24300066	-	RHE_RS02355	WP_011423842.1	415	COG1846	K	ROK family transcriptional regulator	448
RHE_RS00725	D	RHE_RS00725_m4	D	-232	-218	AAAAAATACAACCGC	15.9	9.0e-09	-18526	8046		RHE_RS06580	RHE_RS17430							RHE_RS27460	11	207840	209642	R	24303151	-	RHE_RS27460	WP_011428506.1	600	COG2203	T	PucR family transcriptional regulator	5281		RHE_RS02230	8	452442	454445	D	24299408	-	RHE_RS02230	WP_011423819.1	667	COG0840	NT	methyl-accepting chemotaxis protein	426
RHE_RS15830	R	RHE_RS00725_m4	R	-64	-50	ACAAAAGACAACCAC	12.6	6.5e-07	-14246	6187		RHE_RS06620	RHE_RS17450							RHE_RS26115	11	440314	441060	R	24302340	-	RHE_RS26115	WP_011428251.1	248	COG2186	K	FadR family transcriptional regulator	5012		RHE_RS32825	7	365151	366185	R	30584717	-	RHE_RS32825	WP_011053500.1	344	COG1063	ER	MULTISPECIES: iditol 2-dehydrogenase	5989
RHE_RS17050	D	RHE_RS00725_m4	D	-344	-330	ACAAAAACCTACCGC	10.3	2.5e-06	-12899	5602		RHE_RS06635	RHE_RS17595							RHE_RS26070	11	428901	429641	D	24302349	-	RHE_RS26070	WP_011428243.1	246	COG2207	K	AraC family transcriptional regulator	5004		RHE_RS30285	7	193329	193814	D	24297365	-	RHE_RS30285	WP_011053396.1	161			XRE family transcriptional regulator	5829
RHE_RS29445	R	RHE_RS00725_m4	R	-124	-110	TCAAAATGCTACCGC	9.6	3.7e-06	-12507	5432		RHE_RS06680	RHE_RS17835							RHE_RS26000	11	415886	416785	R	24302363	-	RHE_RS26000	WP_011428230.1	299	COG4977	K	AraC family transcriptional regulator	4990		RHE_RS29615	7	40985	41836	R	24297292	-	RHE_RS29615	WP_009991591.1	283	COG0300	R	MULTISPECIES: KR domain-containing protein	5702
RHE_RS00765	R	RHE_RS00765_m1	R	-179	-167	GGGACAAAGGCCC	13.7	2.3e-07	-15285	6638		RHE_RS06690	RHE_RS17840							RHE_RS25170	11	255016	255498	D	24302529	-	RHE_RS25170	WP_011428076.1	160	COG1522	K	Lrp/AsnC family transcriptional regulator	4829		RHE_RS29535	7	26855	27733	R	24297338	-	RHE_RS29535	WP_029875515.1	292			MULTISPECIES: response regulator	5686
RHE_RS17180	D	RHE_RS00765_m1	D	-101	-89	AAGGCAAAGGCCT	12.8	7.6e-07	-14090	6119		RHE_RS06705	RHE_RS18035							RHE_RS23555	11	152562	153632	D	24302138	-	RHE_RS23555	WP_042119751.1	356	COG1609	K	LacI family DNA-binding transcriptional regulator	4511		RHE_RS29205	7	598951	599604	D	24302802	-	RHE_RS29205	WP_011428836.1	217	COG4566	TK	DNA-binding response regulator	5621
RHE_RS00765	R	RHE_RS00765_m3	R	-331	-312	ACGTTACAAATCGGTAACAG	20.1	2.6e-10	-22070	9585		RHE_RS06730	RHE_RS18085							RHE_RS23110	11	49113	49757	D	24302227	-	RHE_RS23110	WP_041678950.1	214	COG1309	K	TetR/AcrR family transcriptional regulator	4423		RHE_RS29200	7	595866	598709	R	24302803	-	RHE_RS29200	WP_042120030.1	947	COG3710	K	LuxR family transcriptional regulator	5620
RHE_RS02130	R	RHE_RS00765_m3	R	-85	-66	CAGTTAAACATCGGTAAGCT	7.5	2.3e-06	-12983	5638		RHE_RS06820	RHE_RS18135							RHE_RS17145	11	3521414	3522322	D	24301330	-	RHE_RS17145	WP_011426585.1	302	COG0583	K	LysR family transcriptional regulator	3300		RHE_RS28510	7	452187	452903	R	24302941	-	RHE_RS28510	WP_011428705.1	238	COG1802	K	GntR family transcriptional regulator	5488
RHE_RS05315	R	RHE_RS00765_m3	R	-80	-61	AACTTAACGATTGGTAAGGG	7.8	1.9e-06	-13174	5721		RHE_RS06825	RHE_RS18235							RHE_RS17090	11	3504521	3505429	D	24301374	-	RHE_RS17090	WP_011426574.1	302	COG0568	K	RNA polymerase sigma factor RpoH	3289		RHE_RS27845	7	295763	296230	R	24303074	-	RHE_RS27845	WP_011428579.1	155	COG1522	K	Lrp/AsnC family transcriptional regulator	5358
RHE_RS05730	D	RHE_RS00765_m3	D	-316	-297	GTATTGCCGATTTGTAAGGT	11.2	3.0e-07	-15019	6523		RHE_RS06845	RHE_RS18340							RHE_RS16670	11	3425813	3426376	R	24298291	-	RHE_RS16670	WP_042118936.1	187	COG1309	K	TetR/AcrR family transcriptional regulator	3207		RHE_RS25970	7	412994	413578	R	24302369	-	RHE_RS25970	WP_011428225.1	194	COG0662	G	XRE family transcriptional regulator	4985
RHE_RS08125	D	RHE_RS00765_m3	D	-282	-263	ATGTTGCGCAGGGGTAATGC	7.6	2.1e-06	-13074	5678		RHE_RS06875	RHE_RS18525							RHE_RS16100	11	3296911	3300312	R	24299341	-	RHE_RS16100	WP_011426382.1	1133	COG0784	T	hybrid sensor histidine kinase/response regulator	3097		RHE_RS25585	7	334375	335232	D	24302446	-	RHE_RS25585	WP_011428153.1	285	COG1028	IQR	SDR family NAD(P)-dependent oxidoreductase	4908
RHE_RS11360	D	RHE_RS00765_m3	D	-242	-223	ACATTACCAAAAGTTAACAA	4.8	8.8e-06	-11641	5056		RHE_RS06955	RHE_RS18560							RHE_RS15555	11	3181805	3182035	D	24301485	-	RHE_RS15555	WP_011426281.1	76			CopG family transcriptional regulator	2994		RHE_RS25580	7	333385	334224	R	24302447	-	RHE_RS25580	WP_011428152.1	279	COG1414	K	IclR family transcriptional regulator	4907
RHE_RS15700	D	RHE_RS00765_m3	D	-105	-86	GCCTTACTGAAATGTAACGG	5.5	6.2e-06	-11991	5208		RHE_RS07055	RHE_RS18650							RHE_RS14920	11	3051257	3051625	R	24298539	-	RHE_RS14920	WP_042119285.1	122	COG0784	T	response regulator	2872		RHE_RS23885	7	219461	220372	D	24302072	-	RHE_RS23885	WP_042119776.1	303	COG0583	K	LysR family transcriptional regulator	4578
RHE_RS25040	R	RHE_RS00765_m3	R	-220	-201	ACCTTACCAAAATGTAATGT	11.3	2.6e-07	-15163	6585		RHE_RS07105	RHE_RS18665							RHE_RS14355	11	2922699	2923601	D	24301520	-	RHE_RS14355	WP_011426052.1	300	COG0583	K	LysR family transcriptional regulator	2761		RHE_RS23840	7	209998	210951	D	24302081	-	RHE_RS23840	WP_011427823.1	317	COG1082	G	myo-inositol catabolism protein	4569
RHE_RS25605	D	RHE_RS00765_m3	D	-49	-30	GTGTTACCGGTAAGTAACAG	7.9	1.8e-06	-13228	5745		RHE_RS07110	RHE_RS18680							RHE_RS14160	11	2883507	2883923	R	24300946	-	RHE_RS14160	WP_011426013.1	138	COG1733	K	transcriptional regulator	2724		RHE_RS23835	7	208706	209776	R	24302082	-	RHE_RS23835	WP_042119774.1	356	COG1609	K	LacI family transcriptional regulator	4568
RHE_RS25605	D	RHE_RS00765_m3	D	-24	-5	TTGTTACCGATCGGTCACAT	8.0	1.7e-06	-13285	5770		RHE_RS07115	RHE_RS18685							RHE_RS13060	11	2665159	2666082	D	24301044	-	RHE_RS13060	WP_011425806.1	307	COG0583	K	LysR family transcriptional regulator	2518		RHE_RS23640	7	170697	171476	D	24302121	-	RHE_RS23640	WP_011427785.1	259	COG4598	E	histidine/lysine/arginine/ornithine ABC transporter ATP-binding protein HisP	4529
RHE_RS30520	D	RHE_RS00765_m3	D	-151	-132	GCGTTGCAGATTGGTATTAG	6.5	3.8e-06	-12481	5420		RHE_RS07145	RHE_RS18710							RHE_RS12940	11	2641578	2641934	D	24297485	-	RHE_RS12940	WP_011425784.1	118	COG0640	K	ArsR family transcriptional regulator	2496		RHE_RS23635	7	170069	170533	R	24302122	-	RHE_RS23635	WP_011427784.1	154	COG1522	K	Lrp/AsnC family transcriptional regulator	4528
RHE_RS00765	R	RHE_RS00765_m5	R	-325	-313	CGTTACAAATCGG	15.0	5.8e-08	-16663	7237		RHE_RS07165	RHE_RS18760							RHE_RS12670	11	2590396	2591115	D	24301393	-	RHE_RS12670	WP_011425734.1	239	COG0664	T	Crp/Fnr family transcriptional regulator	2445		RHE_RS19750	7	4092469	4092810	R	24297970	-	RHE_RS19750	WP_011427056.1	113	COG0640	K	ArsR family transcriptional regulator	3801
RHE_RS10885	R	RHE_RS00765_m5	R	-164	-152	CATTACAAATGTG	11.8	1.2e-06	-13633	5921		RHE_RS07210	RHE_RS18795							RHE_RS11075	11	2270894	2271589	D	24299851	-	RHE_RS11075	WP_011425429.1	231	COG1309	K	TetR family transcriptional regulator	2139		RHE_RS19670	7	4069010	4070029	R	24300942	-	RHE_RS19670	WP_073990398.1	339	COG1609	K	LacI family transcriptional regulator	3786
RHE_RS10890	D	RHE_RS00765_m5	D	-88	-76	CATTACAAATGTG	11.8	1.2e-06	-13633	5921		RHE_RS07235	RHE_RS18835							RHE_RS08925	11	1826968	1827468	R	24299358	-	RHE_RS08925	WP_011425037.1	166	COG1522	K	Lrp/AsnC family transcriptional regulator	1719		RHE_RS19030	7	3945009	3945968	D	24300473	-	RHE_RS19030	WP_011426931.1	319	COG3284	K	sigma-54-dependent Fis family transcriptional regulator	3666
RHE_RS17400	D	RHE_RS00765_m5	D	-82	-70	CGTCACAAATCAG	9.7	3.9e-06	-12455	5409		RHE_RS07420	RHE_RS18865							RHE_RS06580	11	1332690	1333361	D	24301574	-	RHE_RS06580	WP_011424625.1	223	COG0745	TK	DNA-binding response regulator	1264		RHE_RS18865	7	3908795	3909403	R	24297634	-	RHE_RS18865	WP_011426901.1	202	COG1309	K	TetR/AcrR family transcriptional regulator	3634
RHE_RS00850	R	RHE_RS00855_m1	R	-39	-27	GATATAGACAAGT	14.2	1.1e-07	-16023	6959		RHE_RS07425	RHE_RS18900							RHE_RS06135	11	1251452	1252069	D	24299594	-	RHE_RS06135	WP_011424536.1	205	COG1309	K	TetR/AcrR family transcriptional regulator	1176		RHE_RS17835	7	3677381	3677716	D	24297846	-	RHE_RS17835	WP_011426713.1	111	COG0640	K	ArsR family transcriptional regulator	3429
RHE_RS00855	D	RHE_RS00855_m1	D	-87	-75	GATATAGACAAGT	14.2	1.1e-07	-16023	6959		RHE_RS07430	RHE_RS18970							RHE_RS06105	11	1244328	1245227	R	24299707	-	RHE_RS06105	WP_011424530.1	299	COG0583	K	LysR family transcriptional regulator	1170		RHE_RS17815	7	3670543	3673146	R	24298530	-	RHE_RS17815	WP_011426709.1	867	COG0392	S	bifunctional lysylphosphatidylglycerol flippase/synthetase MprF	3425
RHE_RS02835	R	RHE_RS00855_m1	R	-88	-76	CATATAGACAAGC	9.1	6.1e-06	-12007	5215		RHE_RS07440	RHE_RS19020							RHE_RS05915	11	1206549	1207445	D	24298628	-	RHE_RS05915	WP_011424494.1	298	COG0583	K	LysR family transcriptional regulator	1132		RHE_RS17645	7	3636781	3637047	D	24298501	-	RHE_RS17645	WP_011426678.1	88			hypothetical protein	3391
RHE_RS03145	D	RHE_RS00855_m1	D	-39	-27	ACTATAGACAATT	12.5	6.2e-07	-14294	6208		RHE_RS07480	RHE_RS19030							RHE_RS05380	11	1107313	1107603	D	24298126	-	RHE_RS05380	WP_011424398.1	96			CopG family transcriptional regulator	1033		RHE_RS17135	7	3519397	3520308	D	24301596	-	RHE_RS17135	WP_020922119.1	303	COG0583	K	LysR family transcriptional regulator	3298
RHE_RS24570	D	RHE_RS00855_m1	D	-240	-228	TGAATAGATATTT	8.3	9.3e-06	-11585	5032		RHE_RS07675	RHE_RS19300							RHE_RS04310	11	897493	898287	D	24300904	-	RHE_RS04310	WP_011424205.1	264	COG1414	K	IclR family transcriptional regulator	825		RHE_RS16825	7	3451545	3452195	R	24299420	-	RHE_RS16825	WP_011426523.1	216	COG1309	K	TetR family transcriptional regulator	3236
RHE_RS26275	R	RHE_RS00855_m1	R	-207	-195	TTTATAGACAAAC	9.7	4.4e-06	-12334	5357		RHE_RS07685	RHE_RS19425							RHE_RS03775	11	783013	783618	D	24299159	-	RHE_RS03775	WP_042117931.1	201	COG1595	K	RNA polymerase sigma factor	721		RHE_RS16760	7	3437035	3437829	D	24299921	-	RHE_RS16760	WP_011426509.1	264	COG0784	T	two-component response regulator	3225
RHE_RS26280	D	RHE_RS00855_m1	D	-103	-91	TTTATAGACAAAC	9.7	4.4e-06	-12334	5357		RHE_RS07835	RHE_RS19545							RHE_RS32370	10	521767	522423	R	30584626	-	RHE_RS32370	WP_011428767.1	218	COG1595	K	RNA polymerase sigma factor	5550		RHE_RS16555	7	3401823	3403232	R	24298646	-	RHE_RS16555	WP_011426470.1	469	COG3307	M	O-antigen ligase domain-containing protein	3184
RHE_RS29835	R	RHE_RS00855_m1	R	-38	-26	GCACTAGATATGT	8.7	7.6e-06	-11787	5119		RHE_RS07845	RHE_RS19670							RHE_RS30285	10	193329	193814	D	24297365	-	RHE_RS30285	WP_011053396.1	161			XRE family transcriptional regulator	5829		RHE_RS16230	7	3329555	3330778	R	24299188	-	RHE_RS16230	WP_011426407.1	407	COG1846	K	ROK family transcriptional regulator	3123
RHE_RS00850	R	RHE_RS00855_m2	R	-47	-24	ATTGATATAGACAAGTATACAAGC	6.0	2.2e-07	-15330	6658		RHE_RS07925	RHE_RS19695							RHE_RS27570	10	233212	233445	R	24303129	-	RHE_RS27570	WP_011428527.1	77	COG2002	KV	AbrB family transcriptional regulator	5302		RHE_RS15925	7	3261738	3262313	D	24301339	-	RHE_RS15925	WP_011426350.1	191	COG1695	K	PadR family transcriptional regulator	3063
RHE_RS00850	R	RHE_RS00855_m2	R	-39	-16	AAATGTCTATTGATATAGACAAGT	22.8	1.9e-11	-24687	10721		RHE_RS07935	RHE_RS19745							RHE_RS27470	10	210637	211134	D	24303149	-	RHE_RS27470	WP_011428508.1	165	COG1522	K	Lrp/AsnC family transcriptional regulator	5283		RHE_RS15805	7	3234635	3235960	D	24300594	-	RHE_RS15805	WP_011426326.1	441	COG0161	H	MULTISPECIES: aspartate aminotransferase family protein	3039
RHE_RS00855	D	RHE_RS00855_m2	D	-98	-75	AAATGTCTATTGATATAGACAAGT	22.8	1.9e-11	-24687	10721		RHE_RS08025	RHE_RS19750							RHE_RS26790	10	72240	73412	D	24303285	-	RHE_RS26790	WP_011428382.1	390	COG0664	T	transcriptional regulator	5147		RHE_RS14990	7	3061807	3062631	R	24298169	-	RHE_RS14990	WP_011426173.1	274			helix-turn-helix domain-containing protein	2884
RHE_RS00855	D	RHE_RS00855_m2	D	-90	-67	ATTGATATAGACAAGTATACAAGC	6.0	2.2e-07	-15330	6658		RHE_RS08095	RHE_RS20060							RHE_RS25905	10	398760	399902	R	24302382	-	RHE_RS25905	WP_011428215.1	380	COG2207	K	AraC family transcriptional regulator	4972		RHE_RS14605	7	2983694	2984143	R	24299806	-	RHE_RS14605	WP_080655802.1	149	COG2001	J	transcriptional regulator MraZ	2809
RHE_RS05495	R	RHE_RS00855_m2	R	-38	-15	AGCTATATAGCCAAATGGATATAT	-1.3	3.8e-06	-12481	5420		RHE_RS08125	RHE_RS20110							RHE_RS25060	10	234917	235675	R	24302551	-	RHE_RS25060	WP_011428054.1	252	COG1414	K	IclR family transcriptional regulator	4808		RHE_RS14185	7	2888347	2889273	R	24298136	-	RHE_RS14185	WP_042118741.1	308	COG0583	K	LysR family transcriptional regulator	2729
RHE_RS28555	D	RHE_RS00855_m2	D	-65	-42	TGTTATAGACACTAATGTACATTT	-2.6	6.0e-06	-12024	5222		RHE_RS08145	RHE_RS20285							RHE_RS24760	10	170016	170915	D	24302611	-	RHE_RS24760	WP_011428000.1	299	COG0583	K	LysR family transcriptional regulator	4752		RHE_RS14160	7	2883507	2883923	R	24300946	-	RHE_RS14160	WP_011426013.1	138	COG1733	K	transcriptional regulator	2724
RHE_RS32675	R	RHE_RS00855_m2	R	-191	-168	GCAAGTACATAGACATAGATCATA	-4.0	9.7e-06	-11543	5013		RHE_RS08155	RHE_RS20460							RHE_RS24755	10	169034	169897	R	24302612	-	RHE_RS24755	WP_011427999.1	287	COG0702	R	NmrA family transcriptional regulator	4751		RHE_RS13880	7	2824514	2825719	D	24298042	-	RHE_RS13880	WP_011425962.1	401	COG0523	R	GTP-binding protein	2671
RHE_RS00850	R	RHE_RS00855_m3	R	-90	-71	CGTGACAAGCGTGTGACATC	21.9	3.1e-12	-26500	11509		RHE_RS08350	RHE_RS20490							RHE_RS24735	10	166543	166890	D	24302616	-	RHE_RS24735	WP_011427995.1	115	COG0640	K	ArsR family transcriptional regulator	4747		RHE_RS13755	7	2799989	2800423	D	24301439	-	RHE_RS13755	WP_011425937.1	144	COG0054	H	MULTISPECIES: 6,7-dimethyl-8-ribityllumazine synthase	2647
RHE_RS00855	D	RHE_RS00855_m3	D	-43	-24	CGTGACAAGCGTGTGACATC	21.9	3.1e-12	-26500	11509		RHE_RS08370	RHE_RS20575							RHE_RS23325	10	102240	102866	D	24302184	-	RHE_RS23325	WP_011427722.1	208	COG4566	TK	DNA-binding response regulator	4469		RHE_RS13240	7	2697173	2698012	D	24298973	-	RHE_RS13240	WP_011425838.1	279	COG0702	R	SDR family NAD(P)-dependent oxidoreductase	2552
RHE_RS04490	D	RHE_RS00855_m3	D	-34	-15	TGTGACCATCCTGTCACATT	8.1	3.0e-06	-12717	5523		RHE_RS08755	RHE_RS20580							RHE_RS23020	10	30830	31081	D	24302245	-	RHE_RS23020	WP_011427661.1	83	COG3609	K	MULTISPECIES: transcriptional regulator	4407		RHE_RS13235	7	2696663	2697040	R	24299127	-	RHE_RS13235	WP_011425837.1	125	COG1733	K	transcriptional regulator	2551
RHE_RS13955	R	RHE_RS00855_m3	R	-67	-48	GTTGACAGAGATGTGACAGG	5.9	9.6e-06	-11554	5018		RHE_RS08760	RHE_RS20595							RHE_RS22770	10	167203	168123	D	24301888	-	RHE_RS22770	WP_041678940.1	306	COG2169	L	AraC family transcriptional regulator	4358		RHE_RS12975	7	2647683	2648234	R	24299137	-	RHE_RS12975	WP_011425791.1	183	COG3803	S	DUF924 domain-containing protein	2503
RHE_RS17240	R	RHE_RS00855_m3	R	-94	-75	AATGAATATTCCATGACATG	7.1	5.2e-06	-12167	5284		RHE_RS08770	RHE_RS20625							RHE_RS21915	10	179066	179806	R	24301709	-	RHE_RS21915	WP_032490539.1	246	COG2771	K	LuxR family transcriptional regulator	4195		RHE_RS12605	7	2579053	2579670	R	24301411	-	RHE_RS12605	WP_011425722.1	205	COG0500	QR	MULTISPECIES: class I SAM-dependent methyltransferase	2433
RHE_RS20595	D	RHE_RS00855_m3	D	-63	-44	AATGACACACGAATGACATC	8.1	3.0e-06	-12717	5523		RHE_RS08785	RHE_RS20710							RHE_RS21355	10	57174	57914	D	24301821	-	RHE_RS21355	WP_011427357.1	246	COG0745	TK	MULTISPECIES: DNA-binding response regulator	4111		RHE_RS12440	7	2545186	2545623	D	24299315	-	RHE_RS12440	WP_011425692.1	145	COG0517	T	MULTISPECIES: CBS domain-containing protein	2402
RHE_RS20950	R	RHE_RS00855_m3	R	-78	-59	CATGACAGCGGCATGACAAA	9.8	1.2e-06	-13633	5921		RHE_RS08855	RHE_RS20825							RHE_RS19750	10	4092469	4092810	R	24297970	-	RHE_RS19750	WP_011427056.1	113	COG0640	K	ArsR family transcriptional regulator	3801		RHE_RS12065	7	2469254	2470249	D	24297829	-	RHE_RS12065	WP_011425621.1	331	COG1609	K	LacI family transcriptional regulator	2332
RHE_RS04490	D	RHE_RS00855_m4	D	-36	-17	GATGTGACCATCCTGTCACA	10.5	8.8e-07	-13943	6056		RHE_RS08895	RHE_RS21205							RHE_RS19545	10	4047126	4047407	D	24300643	-	RHE_RS19545	WP_041678914.1	93	COG0271	T	MULTISPECIES: BolA family transcriptional regulator	3762		RHE_RS12060	7	2468122	2469075	R	24298773	-	RHE_RS12060	WP_011425620.1	317	COG1879	G	LacI family transcriptional regulator	2331
RHE_RS08125	D	RHE_RS00855_m4	D	-155	-136	GTTGTAACAAAGCTGTCACA	7.3	5.5e-06	-12111	5260		RHE_RS08920	RHE_RS21355							RHE_RS19020	10	3943129	3943551	D	24300374	-	RHE_RS19020	WP_011426929.1	140	COG0789	K	MULTISPECIES: MerR family DNA-binding transcriptional regulator	3664		RHE_RS11860	7	2418634	2419485	R	24300367	-	RHE_RS11860	WP_020921417.1	283	COG2207	K	AraC family transcriptional regulator	2293
RHE_RS08145	D	RHE_RS00855_m4	D	-70	-51	GCTGTCATGTCTCTGTCATG	10.3	9.3e-07	-13888	6032		RHE_RS08925	RHE_RS21915							RHE_RS18865	10	3908795	3909403	R	24297634	-	RHE_RS18865	WP_011426901.1	202	COG1309	K	TetR/AcrR family transcriptional regulator	3634		RHE_RS10545	7	2151779	2152489	R	24297651	-	RHE_RS10545	WP_011425327.1	236	COG2186	K	FadR family transcriptional regulator	2035
RHE_RS15610	D	RHE_RS00855_m4	D	-129	-110	GAAGTCACGAGATAGTCATT	14.8	4.1e-08	-17010	7387		RHE_RS08955	RHE_RS22020							RHE_RS18685	10	3869325	3870161	D	24298132	-	RHE_RS18685	WP_011426867.1	278	COG2207	K	AraC family transcriptional regulator	3598		RHE_RS10425	7	2128648	2129160	D	24300520	-	RHE_RS10425	WP_011425303.1	170	COG1846	K	MarR family transcriptional regulator	2010
RHE_RS17240	R	RHE_RS00855_m4	R	-130	-111	GCCGTCACGAAACCTTCATG	7.6	4.4e-06	-12334	5357		RHE_RS08960	RHE_RS22030							RHE_RS18085	10	3727018	3727914	R	24299192	-	RHE_RS18085	WP_042119332.1	298	COG0583	K	LysR family transcriptional regulator	3479		RHE_RS10420	7	2127089	2128603	R	24300521	-	RHE_RS10420	WP_011425302.1	504	COG0654	HC	FAD-binding protein	2009
RHE_RS19030	D	RHE_RS00855_m4	D	-139	-120	GATGTCGTGCGACGGTCACT	7.1	5.8e-06	-12058	5237		RHE_RS08975	RHE_RS22090							RHE_RS14770	10	3021343	3022215	D	24298970	-	RHE_RS14770	WP_020921822.1	290	COG1737	K	MurR/RpiR family transcriptional regulator	2842		RHE_RS10410	7	2126258	2126515	D	24299242	-	RHE_RS10410	WP_011425300.1	85			MULTISPECIES: DUF982 domain-containing protein	2006
RHE_RS26235	R	RHE_RS00855_m4	R	-73	-54	TCTGTCATCATGCTGTCATT	8.1	3.4e-06	-12592	5469		RHE_RS08980	RHE_RS22190							RHE_RS13770	10	2802321	2803223	R	24297597	-	RHE_RS13770	WP_011425940.1	300	COG0583	K	LysR family transcriptional regulator	2650		RHE_RS09660	7	1971157	1971504	D	24299531	-	RHE_RS09660	WP_011425172.1	115	COG3795	S	dehydrogenase	1858
RHE_RS28020	D	RHE_RS00855_m4	D	-93	-74	TTTGTCATACATGTGTGATG	6.4	8.4e-06	-11687	5076		RHE_RS09005	RHE_RS22460							RHE_RS13370	10	2725172	2726179	R	24299977	-	RHE_RS13370	WP_011425861.1	335	COG2207	K	AraC family transcriptional regulator	2574		RHE_RS08980	7	1841212	1841988	R	24300301	-	RHE_RS08980	WP_011425048.1	258	COG1058	R	competence/damage-inducible protein A	1730
RHE_RS28605	D	RHE_RS00855_m4	D	-248	-229	CATGTAACCACTCTGTCATA	7.3	5.2e-06	-12167	5284		RHE_RS09015	RHE_RS22605							RHE_RS13235	10	2696663	2697040	R	24299127	-	RHE_RS13235	WP_011425837.1	125	COG1733	K	transcriptional regulator	2551		RHE_RS08155	7	1679364	1679765	D	24298613	-	RHE_RS08155	WP_020920998.1	133	COG1917	R	cupin domain-containing protein	1574
RHE_RS00850	R	RHE_RS00855_m5	R	-47	-24	ATTGATATAGACAAGTATACAAGC	1.7	1.2e-06	-13633	5921		RHE_RS09025	RHE_RS22770							RHE_RS13190	10	2689288	2689809	R	24301479	-	RHE_RS13190	WP_011425830.1	173	COG1733	K	transcriptional regulator	2544		RHE_RS08095	7	1663261	1663605	D	24300562	-	RHE_RS08095	WP_042118237.1	114	COG3450	R	cupin domain-containing protein	1564
RHE_RS00850	R	RHE_RS00855_m5	R	-39	-16	AAATGTCTATTGATATAGACAAGT	24.5	3.3e-12	-26437	11481		RHE_RS09030	RHE_RS22830							RHE_RS12520	10	2558832	2559767	D	24298668	-	RHE_RS12520	WP_011425705.1	311	COG0583	K	LysR family transcriptional regulator	2416		RHE_RS07845	7	1615447	1615761	R	24301408	-	RHE_RS07845	WP_011424868.1	104			DUF1236 domain-containing protein	1519
RHE_RS00855	D	RHE_RS00855_m5	D	-98	-75	AAATGTCTATTGATATAGACAAGT	24.5	3.3e-12	-26437	11481		RHE_RS09045	RHE_RS22955							RHE_RS10640	10	2171429	2172043	D	24298640	-	RHE_RS10640	WP_011425345.1	204	COG1802	K	GntR family transcriptional regulator	2054		RHE_RS06160	7	1255402	1255728	R	24299634	-	RHE_RS06160	WP_011424541.1	108			hypothetical protein	1181
RHE_RS00855	D	RHE_RS00855_m5	D	-90	-67	ATTGATATAGACAAGTATACAAGC	1.7	1.2e-06	-13633	5921		RHE_RS09075	RHE_RS23020							RHE_RS10485	10	2139378	2140328	D	24299247	-	RHE_RS10485	WP_011425315.1	316	COG0583	K	MULTISPECIES: LysR family transcriptional regulator	2022		RHE_RS06055	7	1233612	1235168	R	24301436	-	RHE_RS06055	WP_011424520.1	518	COG0433	L	DUF853 domain-containing protein	1159
RHE_RS05495	R	RHE_RS00855_m5	R	-38	-15	AGCTATATAGCCAAATGGATATAT	-1.4	3.8e-06	-12481	5420		RHE_RS09080	RHE_RS23055							RHE_RS09045	10	1856155	1856616	R	24301418	-	RHE_RS09045	WP_011425061.1	153	COG1522	K	Lrp/AsnC family transcriptional regulator	1742		RHE_RS05465	7	1125820	1126110	R	24301040	-	RHE_RS05465	WP_042118068.1	96			hypothetical protein	1049
RHE_RS05790	D	RHE_RS00855_m5	D	-262	-239	GAATGTCTATAAAATTAGTAGAGT	-2.8	6.2e-06	-11991	5208		RHE_RS09090	RHE_RS23065							RHE_RS09025	10	1851350	1852318	D	24300916	-	RHE_RS09025	WP_011425057.1	322	COG0583	K	LysR family transcriptional regulator	1739		RHE_RS05330	7	1099101	1099445	R	24297929	-	RHE_RS05330	WP_011424390.1	114	COG0640	K	ArsR family transcriptional regulator	1025
RHE_RS28555	D	RHE_RS00855_m5	D	-65	-42	TGTTATAGACACTAATGTACATTT	-3.7	8.5e-06	-11675	5071		RHE_RS09115	RHE_RS23080							RHE_RS08785	10	1799309	1800364	D	24301455	-	RHE_RS08785	WP_011425012.1	351	COG1609	K	LacI family DNA-binding transcriptional regulator	1692		RHE_RS04645	7	973394	974497	D	24298582	-	RHE_RS04645	WP_041678830.1	367	COG2771	K	helix-turn-helix transcriptional regulator	891
RHE_RS01095	D	RHE_RS01095_m1	D	-30	-14	CTCTAGCGTAACGATTT	17.8	2.7e-09	-19730	8569		RHE_RS09130	RHE_RS23110							RHE_RS08760	10	1793825	1794712	D	24298672	-	RHE_RS08760	WP_011425005.1	295	COG0583	K	LysR family transcriptional regulator	1688		RHE_RS04555	7	952645	954426	D	24297565	-	RHE_RS04555	WP_011424252.1	593	COG1960	I	acyl-CoA dehydrogenase	873
RHE_RS21310	D	RHE_RS01095_m1	D	-31	-15	CGCTTTGGTGACGATTT	7.3	4.4e-06	-12334	5357		RHE_RS09165	RHE_RS23130							RHE_RS07685	10	1583044	1583559	D	24299318	-	RHE_RS07685	WP_004673822.1	171	COG1846	K	MULTISPECIES: MarR family transcriptional regulator	1487		RHE_RS04550	7	951442	952437	R	24297566	-	RHE_RS04550	WP_011424251.1	331	COG0598	P	transporter	872
RHE_RS01095	D	RHE_RS01095_m2	D	-12	-1	CGGAGGGGCCGT	10.0	7.0e-06	-11870	5155		RHE_RS09210	RHE_RS23180							RHE_RS05735	10	1173008	1173928	D	24299753	-	RHE_RS05735	WP_011424463.1	306	COG0583	K	LysR family transcriptional regulator	1099		RHE_RS04340	7	904635	905846	D	24297733	-	RHE_RS04340	WP_042117984.1	403	COG3773	DM	cell wall hydrolase	830
RHE_RS02830	D	RHE_RS01095_m2	D	-246	-235	CAGAGGGGGCGC	10.9	2.8e-06	-12786	5553		RHE_RS09225	RHE_RS23325							RHE_RS05315	10	1094963	1095646	R	24300376	-	RHE_RS05315	WP_042119188.1	227	COG0745	TK	DNA-binding response regulator	1022		RHE_RS04310	7	897493	898287	D	24300904	-	RHE_RS04310	WP_011424205.1	264	COG1414	K	IclR family transcriptional regulator	825
RHE_RS04545	R	RHE_RS01095_m2	R	-351	-340	GCGAGGGGACGT	11.2	2.2e-06	-13027	5658		RHE_RS09235	RHE_RS23350							RHE_RS05020	10	1040948	1041634	R	24301172	-	RHE_RS05020	WP_011424339.1	228	COG0640	K	ArsR family transcriptional regulator	963		RHE_RS04030	7	838153	839109	R	24299214	-	RHE_RS04030	WP_011424150.1	318	COG0583	K	LysR family transcriptional regulator	769
RHE_RS29390	D	RHE_RS01095_m2	D	-105	-94	TAGAGGGGACGC	10.0	7.0e-06	-11870	5155		RHE_RS09265	RHE_RS23470							RHE_RS04645	10	973394	974497	D	24298582	-	RHE_RS04645	WP_041678830.1	367	COG2771	K	helix-turn-helix transcriptional regulator	891		RHE_RS03645	7	748041	751841	R	24297525	-	RHE_RS03645	WP_011424083.1	1266	COG5002	T	PAS domain-containing sensor histidine kinase	699
RHE_RS01095	D	RHE_RS01095_m3	D	-32	-18	GGCTCTAGCGTAACG	12.8	2.9e-07	-15053	6538		RHE_RS09390	RHE_RS23520							RHE_RS04315	10	898509	899243	D	24297576	-	RHE_RS04315	WP_042117980.1	244	COG2197	TK	LuxR family transcriptional regulator	826		RHE_RS02975	7	608004	608825	R	24298919	-	RHE_RS02975	WP_011423953.1	273			hypothetical protein	566
RHE_RS10390	R	RHE_RS01095_m4	R	-306	-296	CCCTACGGAAA	9.2	7.4e-06	-11814	5131		RHE_RS09410	RHE_RS23540							RHE_RS04025	10	837503	838144	D	24300269	-	RHE_RS04025	WP_011424149.1	213	COG1309	K	TetR/AcrR family transcriptional regulator	768		RHE_RS02430	7	494083	494475	D	24299243	-	RHE_RS02430	WP_011423857.1	130	COG3861	S	PRC-barrel domain containing protein	462
RHE_RS01095	D	RHE_RS01095_m5	D	-30	-10	CTCTAGCGTAACGATTTCCGG	19.7	2.7e-10	-22033	9569		RHE_RS09445	RHE_RS23555							RHE_RS04010	10	834800	835717	R	24299065	-	RHE_RS04010	WP_042117962.1	305	COG0583	K	LysR family transcriptional regulator	765		RHE_RS02425	7	492121	493821	R	24299244	-	RHE_RS02425	WP_011423856.1	566	COG0318	IQ	long-chain-fatty-acid--CoA ligase	461
RHE_RS01265	D	RHE_RS01265_m1	D	-28	-13	TCTTATAGTAGAATCA	17.1	2.5e-09	-19807	8602		RHE_RS09465	RHE_RS23635							RHE_RS02165	10	442766	443131	D	24300565	-	RHE_RS02165	WP_042117808.1	121	COG0640	K	ArsR family transcriptional regulator	414		RHE_RS02310	7	467262	467843	R	24300304	-	RHE_RS02310	WP_011423833.1	193	COG1309	K	TetR/AcrR family transcriptional regulator	439
RHE_RS10420	R	RHE_RS01265_m1	R	-44	-29	CATAATAGGAGAATCG	8.9	6.7e-06	-11913	5174		RHE_RS09505	RHE_RS23665							RHE_RS01430	10	293168	293611	D	24301601	-	RHE_RS01430	WP_042117749.1	147	COG1846	K	MarR family transcriptional regulator	272		RHE_RS01930	7	392451	392942	R	24298311	-	RHE_RS01930	WP_011423764.1	163	COG0589	T	MULTISPECIES: universal stress protein	367
RHE_RS10425	D	RHE_RS01265_m1	D	-20	-5	CATAATAGGAGAATCG	8.9	6.7e-06	-11913	5174		RHE_RS09660	RHE_RS23775							RHE_RS01410	10	289580	290077	R	24300618	-	RHE_RS01410	WP_011423663.1	165	COG1846	K	MarR family transcriptional regulator	268		RHE_RS33115	6	212449	213212	R	31930222	-	RHE_RS33115	WP_086005066.1	254	COG3293	X	IS5-like element ISRel11 family transposase	5850
RHE_RS16030	R	RHE_RS01265_m1	R	-109	-94	CCCTATACGAGAACCG	9.3	5.1e-06	-12186	5292		RHE_RS09670	RHE_RS23835							RHE_RS01265	10	263547	264116	D	24301652	-	RHE_RS01265	WP_011423635.1	189	COG1396	K	XRE family transcriptional regulator	239		RHE_RS32370	6	521767	522423	R	30584626	-	RHE_RS32370	WP_011428767.1	218	COG1595	K	RNA polymerase sigma factor	5550
RHE_RS16035	D	RHE_RS01265_m1	D	-109	-94	CCCTATACGAGAACCG	9.3	5.1e-06	-12186	5292		RHE_RS09750	RHE_RS23885							RHE_RS29835	9	92757	93092	R	24297156	-	RHE_RS29835	WP_026188835.1	111	COG1813	J	MULTISPECIES: XRE family transcriptional regulator	5745		RHE_RS32120	6	5080	6855	D	30584576	-	RHE_RS32120	WP_011427634.1	591	COG0765	E	ABC transporter ATP-binding protein	4380
RHE_RS01265	D	RHE_RS01265_m2	D	-32	-13	TTTCTCTTATAGTAGAATCA	19.6	3.6e-11	-24048	10444		RHE_RS10220	RHE_RS23915							RHE_RS28305	9	405850	406326	R	24302982	-	RHE_RS28305	WP_004679019.1	158	COG1522	K	MULTISPECIES: Lrp/AsnC family transcriptional regulator	5447		RHE_RS31055	6	341918	342115	D	24297282	-	RHE_RS31055	WP_011053487.1	65			MULTISPECIES: hypothetical protein	5971
RHE_RS06680	D	RHE_RS01265_m2	D	-130	-111	AAATTATACTAATATAGTGC	8.0	9.3e-06	-11585	5032		RHE_RS10365	RHE_RS23945							RHE_RS28010	9	343261	344268	D	24303041	-	RHE_RS28010	WP_011428612.1	335	COG1609	K	LacI family transcriptional regulator	5390		RHE_RS30470	6	231727	232443	D	24297380	-	RHE_RS30470	WP_011053428.1	238	COG0664	T	Crp/Fnr family transcriptional regulator	5862
RHE_RS11740	R	RHE_RS01265_m2	R	-237	-218	TTATTATTATAGTCGAACCC	11.1	1.2e-06	-13633	5921		RHE_RS10375	RHE_RS24090							RHE_RS24110	9	22944	23981	R	24302741	-	RHE_RS24110	WP_011427876.1	345	COG1609	K	LacI family transcriptional regulator	4621		RHE_RS30095	6	151474	152439	D	24297343	-	RHE_RS30095	WP_008534397.1	321	COG2207	K	MULTISPECIES: AraC family transcriptional regulator	5794
RHE_RS25565	D	RHE_RS01265_m2	D	-58	-39	TTATTCTATTATAAGGATTT	9.4	4.1e-06	-12405	5387		RHE_RS10390	RHE_RS24095							RHE_RS23470	9	130057	131046	R	24302155	-	RHE_RS23470	WP_011427750.1	329	COG4977	K	GlxA family transcriptional regulator	4494		RHE_RS29990	6	129658	130425	R	24297126	-	RHE_RS29990	WP_004671535.1	255	COG1028	IQR	MULTISPECIES: SDR family NAD(P)-dependent oxidoreductase	5774
RHE_RS25695	D	RHE_RS01265_m2	D	-70	-51	TGATTCTCAGAGTAGAAAAT	9.9	2.8e-06	-12786	5553		RHE_RS10400	RHE_RS24110							RHE_RS18835	9	3899120	3900073	R	24300884	-	RHE_RS18835	WP_011426895.1	317	COG2390	K	sugar-binding transcriptional regulator	3628		RHE_RS29975	6	125893	126582	D	24297251	-	RHE_RS29975	WP_004673291.1	229	COG1802	K	MULTISPECIES: GntR family transcriptional regulator	5771
RHE_RS01265	D	RHE_RS01265_m4	D	-55	-34	TGATTCCATCATGAGATAATGT	12.5	2.7e-07	-15125	6569		RHE_RS10410	RHE_RS24475							RHE_RS18035	9	3719211	3719471	D	24301547	-	RHE_RS18035	WP_011426750.1	86	COG0640	K	ArsR family transcriptional regulator	3469		RHE_RS29445	6	4408	5325	R	24297270	-	RHE_RS29445	WP_008534020.1	305	COG1961	L	MULTISPECIES: recombinase family protein	5671
RHE_RS01265	D	RHE_RS01265_m4	D	-34	-13	TATTTCTCTTATAGTAGAATCA	22.8	7.9e-13	-27867	12102		RHE_RS10420	RHE_RS24540							RHE_RS17135	9	3519397	3520308	D	24301596	-	RHE_RS17135	WP_020922119.1	303	COG0583	K	LysR family transcriptional regulator	3298		RHE_RS29390	6	633498	634427	D	24302765	-	RHE_RS29390	WP_041679353.1	309	COG1175	G	sugar ABC transporter permease	5658
RHE_RS11740	R	RHE_RS01265_m4	R	-135	-114	AAACTATTTTATGATGTAATTA	11.8	4.5e-07	-14614	6347		RHE_RS10425	RHE_RS24620							RHE_RS15675	9	3205673	3206182	D	24301290	-	RHE_RS15675	WP_011426302.1	169	COG1595	K	RNA polymerase sigma factor	3016		RHE_RS29165	6	589027	590241	R	24302810	-	RHE_RS29165	WP_011428827.1	404	COG3213	V	short-chain dehydrogenase	5613
RHE_RS28450	R	RHE_RS01265_m4	R	-112	-91	AAACTCTCACATAAGAGGTTCT	8.0	5.4e-06	-12129	5268		RHE_RS10445	RHE_RS24735							RHE_RS15210	9	3114974	3115441	R	24299723	-	RHE_RS15210	WP_020921868.1	155	COG1522	K	Lrp/AsnC family transcriptional regulator	2929		RHE_RS29075	6	572421	573152	D	24302828	-	RHE_RS29075	WP_011428811.1	243	COG0664	T	nitrogen fixation transcriptional regulator protein	5595
RHE_RS01345	R	RHE_RS01350_m1	R	-118	-106	CTGTTCTATCATT	14.9	5.8e-08	-16663	7237		RHE_RS10485	RHE_RS24755							RHE_RS15040	9	3070065	3070784	R	24301244	-	RHE_RS15040	WP_011426183.1	239	COG0664	T	Crp/Fnr family transcriptional regulator	2895		RHE_RS27935	6	322860	324011	D	24303056	-	RHE_RS27935	WP_011428597.1	383	COG1846	K	ROK family transcriptional regulator	5375
RHE_RS01350	D	RHE_RS01350_m1	D	-22	-10	CTGTTCTATCATT	14.9	5.8e-08	-16663	7237		RHE_RS10490	RHE_RS24760							RHE_RS13215	9	2692971	2693621	R	24298427	-	RHE_RS13215	WP_011425833.1	216	COG1309	K	TetR/AcrR family transcriptional regulator	2547		RHE_RS27930	6	321663	322691	R	24303057	-	RHE_RS27930	WP_041679322.1	342	COG4977	K	AraC family transcriptional regulator	5374
RHE_RS04310	D	RHE_RS01350_m1	D	-114	-102	CTGTTCCATTATT	11.0	1.8e-06	-13228	5745		RHE_RS10510	RHE_RS24850							RHE_RS12325	9	2524728	2525468	R	24299427	-	RHE_RS12325	WP_011425670.1	246	COG0745	TK	DNA-binding response regulator	2380		RHE_RS27715	6	265769	266497	D	24303100	-	RHE_RS27715	WP_011428556.1	242	COG3568	R	EEP domain-containing protein	5330
RHE_RS08145	D	RHE_RS01350_m1	D	-31	-19	CTGTTCGATCGTT	9.7	5.0e-06	-12206	5301		RHE_RS10545	RHE_RS24980							RHE_RS10960	9	2243950	2244699	R	24297483	-	RHE_RS10960	WP_073990381.1	249			GntR family transcriptional regulator	2118		RHE_RS27075	6	133104	133412	R	24303228	-	RHE_RS27075	WP_011428434.1	102			hypothetical protein	5203
RHE_RS10640	D	RHE_RS01350_m1	D	-84	-72	CTGTTCTGATATT	8.8	9.6e-06	-11554	5018		RHE_RS10580	RHE_RS25040							RHE_RS09445	9	1938515	1939174	D	24297790	-	RHE_RS09445	WP_042118314.1	219	COG1309	K	TetR/AcrR family transcriptional regulator	1822		RHE_RS26765	6	67085	67843	D	24303290	-	RHE_RS26765	WP_011428377.1	252	COG2186	K	FadR family transcriptional regulator	5142
RHE_RS15180	R	RHE_RS01350_m1	R	-30	-18	ATGTTCTAATATA	9.0	7.8e-06	-11761	5108		RHE_RS10640	RHE_RS25060							RHE_RS07110	9	1466681	1467166	D	24300132	-	RHE_RS07110	WP_042118173.1	161	COG0784	T	response regulator	1371		RHE_RS26720	6	61512	62237	D	24303299	-	RHE_RS26720	WP_011428372.1	241	COG0664	T	Crp/Fnr family transcriptional regulator	5134
RHE_RS25565	D	RHE_RS01350_m1	D	-58	-46	TTATTCTATTATA	10.0	3.8e-06	-12481	5420		RHE_RS10680	RHE_RS25170							RHE_RS07105	9	1465826	1466578	D	24300133	-	RHE_RS07105	WP_011424727.1	250	COG0664	T	Crp/Fnr family transcriptional regulator	1370		RHE_RS26355	6	492450	493478	D	24302292	-	RHE_RS26355	WP_011428300.1	342	COG1879	G	MULTISPECIES: LacI family DNA-binding transcriptional regulator	5062
RHE_RS27305	R	RHE_RS01350_m1	R	-161	-149	CAGTTCTATAAAT	9.8	4.5e-06	-12311	5347		RHE_RS10750	RHE_RS25185							RHE_RS06705	9	1367619	1368092	D	24298374	-	RHE_RS06705	WP_042119214.1	157	COG1522	K	MULTISPECIES: Lrp/AsnC family transcriptional regulator	1289		RHE_RS26350	6	491232	492320	R	24302293	-	RHE_RS26350	WP_011428299.1	362	COG3239	I	fatty acid desaturase	5061
RHE_RS01350	D	RHE_RS01350_m2	D	-22	-1	CTGTTCTATCATTTCGATCAAT	9.6	5.5e-06	-12111	5260		RHE_RS10775	RHE_RS25290							RHE_RS05750	9	1176195	1177085	D	24297977	-	RHE_RS05750	WP_073990369.1	296	COG0583	K	LysR family transcriptional regulator	1102		RHE_RS26280	6	477117	477902	D	24302307	-	RHE_RS26280	WP_011428285.1	261	COG1414	K	IclR family transcriptional regulator	5047
RHE_RS04645	D	RHE_RS01350_m2	D	-125	-104	TTGTAGTATTGATCGCTTCACG	12.3	5.1e-07	-14489	6292		RHE_RS10885	RHE_RS25455							RHE_RS05730	9	1171858	1172895	D	24299250	-	RHE_RS05730	WP_011424462.1	345	COG1609	K	LacI family DNA-binding transcriptional regulator	1098		RHE_RS26275	6	476089	476823	R	24302308	-	RHE_RS26275	WP_011428284.1	244	COG1028	IQR	MULTISPECIES: SDR family NAD(P)-dependent oxidoreductase	5046
RHE_RS06395	R	RHE_RS01350_m2	R	-166	-145	GGGTTTTATGTTAGGGTTAATG	9.8	4.7e-06	-12268	5328		RHE_RS10890	RHE_RS25540							RHE_RS05000	9	1038395	1039291	D	24297850	-	RHE_RS05000	WP_011424335.1	298	COG0583	K	LysR family transcriptional regulator	959		RHE_RS26195	6	458777	459910	R	24302324	-	RHE_RS26195	WP_042119910.1	377	COG0404	E	aminomethyl transferase family protein	5030
RHE_RS08855	R	RHE_RS01350_m2	R	-147	-126	CAGTATTTTTGATGACATCACT	8.9	9.5e-06	-11564	5022		RHE_RS10930	RHE_RS25580							RHE_RS03275	9	669101	669847	D	24300699	-	RHE_RS03275	WP_042117883.1	248	COG2771	K	LuxR family transcriptional regulator	625		RHE_RS26070	6	428901	429641	D	24302349	-	RHE_RS26070	WP_011428243.1	246	COG2207	K	AraC family transcriptional regulator	5004
RHE_RS17645	D	RHE_RS01350_m2	D	-69	-48	TGGAACTATTCTTTCGATCATG	9.7	5.5e-06	-12111	5260		RHE_RS10940	RHE_RS25595							RHE_RS02600	9	532567	533250	D	24301529	phoB	RHE_RS02600	WP_004672768.1	227	COG0745	TK	MULTISPECIES: phosphate regulon transcriptional regulatory protein PhoB	496		RHE_RS25335	6	282101	284749	R	24302496	ligD	RHE_RS25335	WP_011428106.1	882	COG1793	L	DNA ligase D	4860
RHE_RS01345	R	RHE_RS01350_m3	R	-111	-82	AAAATGCATGCAGTTTCTAACGGCCTGTTC	29.1	8.6e-15	-32387	14066		RHE_RS10960	RHE_RS25605							RHE_RS02045	9	417495	419054	D	24298077	rpoN	RHE_RS02045	WP_011423785.1	519	COG1508	K	RNA polymerase sigma-54 factor	390		RHE_RS24540	6	117367	118077	D	24302655	-	RHE_RS24540	WP_029531946.1	236	COG1802	K	MULTISPECIES: GntR family transcriptional regulator	4708
RHE_RS01350	D	RHE_RS01350_m3	D	-46	-17	AAAATGCATGCAGTTTCTAACGGCCTGTTC	29.1	8.6e-15	-32387	14066		RHE_RS10970	RHE_RS25725							RHE_RS29630	8	44177	45082	D	24297237	-	RHE_RS29630	WP_004674388.1	301	COG0583	K	MULTISPECIES: LysR family transcriptional regulator	5704		RHE_RS23775	6	197007	197912	D	24302094	-	RHE_RS23775	WP_011427811.1	301	COG0583	K	LysR family transcriptional regulator	4556
RHE_RS02310	R	RHE_RS01350_m3	R	-30	-1	ACACTCGCCTCGATTCTTTATCAGTTGTTC	2.5	4.1e-06	-12405	5387		RHE_RS10990	RHE_RS25835							RHE_RS28625	8	475398	476108	D	24302918	-	RHE_RS28625	WP_011428727.1	236	COG1595	K	RNA polymerase sigma factor	5511		RHE_RS23690	6	180007	181359	R	24302111	-	RHE_RS23690	WP_011427795.1	450	COG2141	HR	LLM class flavin-dependent oxidoreductase	4539
RHE_RS05790	D	RHE_RS01350_m3	D	-252	-223	AAAATTAGTAGAGTTACACGCAGCCTGTCA	2.2	4.5e-06	-12311	5347		RHE_RS11040	RHE_RS25905							RHE_RS28510	8	452187	452903	R	24302941	-	RHE_RS28510	WP_011428705.1	238	COG1802	K	GntR family transcriptional regulator	5488		RHE_RS23680	6	178123	179106	R	24302113	-	RHE_RS23680	WP_011427793.1	327	COG0715	P	ABC transporter substrate-binding protein	4537
RHE_RS23885	D	RHE_RS01350_m3	D	-45	-16	ATAATTGGGTACAATGTGCACGGGCTGTGC	7.1	4.5e-07	-14614	6347		RHE_RS11075	RHE_RS25970							RHE_RS27310	8	178626	179273	R	24303181	-	RHE_RS27310	WP_011428477.1	215	COG1309	K	TetR/AcrR family transcriptional regulator	5253		RHE_RS23665	6	174813	175247	R	24302116	-	RHE_RS23665	WP_041678964.1	144	COG1846	K	MarR family transcriptional regulator	4534
RHE_RS02290	D	RHE_RS01350_m4	D	-65	-44	GTTGATCTGATATATCAGACCA	10.8	2.1e-06	-13074	5678		RHE_RS11295	RHE_RS26000							RHE_RS23885	8	219461	220372	D	24302072	-	RHE_RS23885	WP_042119776.1	303	COG0583	K	LysR family transcriptional regulator	4578		RHE_RS23565	6	154686	155627	R	24302136	-	RHE_RS23565	WP_042119753.1	313	COG1052	CHR	2-hydroxyacid dehydrogenase	4513
RHE_RS12760	D	RHE_RS01350_m4	D	-220	-199	CGAATTCAATAATTTAGTACCG	11.2	1.5e-06	-13410	5824		RHE_RS11340	RHE_RS26015							RHE_RS23665	8	174813	175247	R	24302116	-	RHE_RS23665	WP_041678964.1	144	COG1846	K	MarR family transcriptional regulator	4534		RHE_RS23130	6	55707	56393	D	24302223	-	RHE_RS23130	WP_011427684.1	228	COG0745	TK	DNA-binding response regulator	4427
RHE_RS23130	D	RHE_RS01350_m4	D	-83	-62	CTAACTCTTAAATGTAGAACAG	9.8	4.8e-06	-12247	5319		RHE_RS11355	RHE_RS26040							RHE_RS23130	8	55707	56393	D	24302223	-	RHE_RS23130	WP_011427684.1	228	COG0745	TK	DNA-binding response regulator	4427		RHE_RS23065	6	40175	40879	D	24302236	-	RHE_RS23065	WP_011427670.1	234	COG1802	K	GntR family transcriptional regulator	4416
RHE_RS13505	R	RHE_RS01350_m5	R	-102	-91	AGAAATCATAGA	10.2	3.6e-06	-12535	5444		RHE_RS11360	RHE_RS26070							RHE_RS23065	8	40175	40879	D	24302236	-	RHE_RS23065	WP_011427670.1	234	COG1802	K	GntR family transcriptional regulator	4416		RHE_RS22740	6	160182	160781	D	24301894	-	RHE_RS22740	WP_020922744.1	199			HupE/UreJ family protein	4352
RHE_RS27645	D	RHE_RS01350_m5	D	-281	-270	CGAAACCATAGA	10.8	2.5e-06	-12899	5602		RHE_RS11445	RHE_RS26115							RHE_RS20110	8	4162525	4163085	D	24298118	-	RHE_RS20110	WP_011427123.1	186	COG1595	K	RNA polymerase sigma factor RpoE	3873		RHE_RS22030	6	7468	8115	R	24302036	-	RHE_RS22030	WP_032490474.1	215	COG1309	K	TetR/AcrR family transcriptional regulator	4217
RHE_RS01410	R	RHE_RS01410_m1	R	-81	-57	ATTTATCTTGATGTAGAGATTCTTG	20.5	1.4e-10	-22689	9854		RHE_RS11520	RHE_RS26235							RHE_RS18710	8	3875348	3876256	D	24298177	-	RHE_RS18710	WP_011426872.1	302	COG0583	K	LysR family transcriptional regulator	3603		RHE_RS20580	6	4262380	4263243	D	24299232	-	RHE_RS20580	WP_011427212.1	287	COG0568	K	MULTISPECIES: RNA polymerase factor sigma-32	3969
RHE_RS01410	R	RHE_RS01410_m1	R	-44	-20	AGATATCTTGACGTCAAGATAAACT	24.2	2.8e-12	-26601	11553		RHE_RS11595	RHE_RS26280							RHE_RS16815	8	3449841	3450740	D	24299507	-	RHE_RS16815	WP_042118944.1	299	COG0583	K	LysR family transcriptional regulator	3235		RHE_RS20325	6	4202831	4204045	D	24298782	-	RHE_RS20325	WP_011427166.1	404	COG0654	HC	2-octaprenyl-6-methoxyphenyl hydroxylase	3918
RHE_RS05940	D	RHE_RS01410_m1	D	-72	-48	GACTACTTTGACGTGAAAATACATT	7.5	7.6e-07	-14090	6119		RHE_RS11625	RHE_RS26355							RHE_RS14605	8	2983694	2984143	R	24299806	-	RHE_RS14605	WP_080655802.1	149	COG2001	J	transcriptional regulator MraZ	2809		RHE_RS19065	6	3951956	3952456	D	24300435	-	RHE_RS19065	WP_011426938.1	166	COG0839	C	NADH-quinone oxidoreductase subunit J	3673
RHE_RS06495	R	RHE_RS01410_m1	R	-270	-246	GATTGACTTTAAATCAAGGTAAATT	8.1	5.6e-07	-14395	6252		RHE_RS11690	RHE_RS26495							RHE_RS13800	8	2811162	2811746	R	24301118	-	RHE_RS13800	WP_011425946.1	194	COG1309	K	TetR/AcrR family transcriptional regulator	2656		RHE_RS18455	6	3817991	3819643	D	24298319	-	RHE_RS18455	WP_011426823.1	550	COG3920	T	HAMP domain-containing protein	3553
RHE_RS15405	R	RHE_RS01410_m1	R	-81	-57	AGTAATATTGACGTAAATCTACGCA	3.0	6.5e-06	-11944	5187		RHE_RS11740	RHE_RS26635							RHE_RS12035	8	2463809	2464102	R	24297700	-	RHE_RS12035	WP_011425615.1	97	COG1737	K	MurR/RpiR family transcriptional regulator	2326		RHE_RS18370	6	3793850	3796312	D	24298388	-	RHE_RS18370	WP_011426808.1	820	COG0058	G	glycogen/starch/alpha-glucan phosphorylase	3536
RHE_RS18680	D	RHE_RS01410_m1	D	-88	-64	TTTTATCGTCATATCAAGATGTATA	6.8	1.1e-06	-13720	5959		RHE_RS11860	RHE_RS26680							RHE_RS11690	8	2388570	2388803	D	24298815	-	RHE_RS11690	WP_011425547.1	77	COG0271	T	MULTISPECIES: BolA family transcriptional regulator	2259		RHE_RS18085	6	3727018	3727914	R	24299192	-	RHE_RS18085	WP_042119332.1	298	COG0583	K	LysR family transcriptional regulator	3479
RHE_RS25970	R	RHE_RS01410_m1	R	-65	-41	GAAAATTTTCACCACAAGATAATTA	6.5	1.3e-06	-13553	5886		RHE_RS11900	RHE_RS26695							RHE_RS05415	8	1111189	1112082	R	24299353	-	RHE_RS05415	WP_011424404.1	297	COG0583	K	LysR family transcriptional regulator	1039		RHE_RS17595	6	3626357	3627247	R	24298709	-	RHE_RS17595	WP_011426669.1	296	COG0662	G	AraC family transcriptional regulator	3382
RHE_RS01410	R	RHE_RS01410_m2	R	-80	-56	AATTTATCTTGATGTAGAGATTCTT	21.9	3.9e-11	-23967	10409		RHE_RS11905	RHE_RS26720							RHE_RS05265	8	1087781	1088035	D	24298606	-	RHE_RS05265	WP_041678841.1	84			DNA-directed RNA polymerase sigma-70 factor	1012		RHE_RS17200	6	3535166	3535630	R	24298572	-	RHE_RS17200	WP_011426596.1	154	COG1959	K	Rrf2 family transcriptional regulator	3311
RHE_RS01410	R	RHE_RS01410_m2	R	-43	-19	TAGATATCTTGACGTCAAGATAAAC	22.5	2.0e-11	-24635	10699		RHE_RS11960	RHE_RS26765							RHE_RS03210	8	655974	656270	D	24300658	-	RHE_RS03210	WP_020920372.1	98	COG1396	K	XRE family transcriptional regulator	612		RHE_RS16815	6	3449841	3450740	D	24299507	-	RHE_RS16815	WP_042118944.1	299	COG0583	K	LysR family transcriptional regulator	3235
RHE_RS05940	D	RHE_RS01410_m2	D	-73	-49	GGACTACTTTGACGTGAAAATACAT	5.3	2.6e-06	-12860	5585		RHE_RS12035	RHE_RS26790							RHE_RS03040	8	618817	619410	R	24299793	-	RHE_RS03040	WP_042117869.1	197	COG1309	K	TetR/AcrR family transcriptional regulator	578		RHE_RS16670	6	3425813	3426376	R	24298291	-	RHE_RS16670	WP_042118936.1	187	COG1309	K	TetR/AcrR family transcriptional regulator	3207
RHE_RS06495	R	RHE_RS01410_m2	R	-269	-245	TGATTGACTTTAAATCAAGGTAAAT	7.1	1.0e-06	-13816	6000		RHE_RS12060	RHE_RS26795							RHE_RS02315	8	468071	469603	R	24299253	-	RHE_RS02315	WP_011423834.1	510	COG0457	R	transcriptional regulator	440		RHE_RS16415	6	3370721	3371146	R	24301505	-	RHE_RS16415	WP_011426443.1	141	COG1396	K	XRE family transcriptional regulator	3157
RHE_RS15405	R	RHE_RS01410_m2	R	-80	-56	CAGTAATATTGACGTAAATCTACGC	4.0	4.5e-06	-12311	5347		RHE_RS12065	RHE_RS26800							RHE_RS32555	7	110017	111051	R	30584663	-	RHE_RS32555	WP_008534360.1	344	COG2207	K	MULTISPECIES: AraC family transcriptional regulator	5761		RHE_RS15880	6	3251805	3252986	D	24300537	-	RHE_RS15880	WP_011426341.1	393	COG0438	M	glycosyltransferase family 1 protein	3054
RHE_RS18680	D	RHE_RS01410_m2	D	-89	-65	GTTTTATCGTCATATCAAGATGTAT	7.4	8.8e-07	-13943	6056		RHE_RS12090	RHE_RS26840							RHE_RS30470	7	231727	232443	D	24297380	-	RHE_RS30470	WP_011053428.1	238	COG0664	T	Crp/Fnr family transcriptional regulator	5862		RHE_RS15675	6	3205673	3206182	D	24301290	-	RHE_RS15675	WP_011426302.1	169	COG1595	K	RNA polymerase sigma factor	3016
RHE_RS25970	R	RHE_RS01410_m2	R	-64	-40	CGAAAATTTTCACCACAAGATAATT	5.8	2.0e-06	-13122	5699		RHE_RS12120	RHE_RS26875							RHE_RS29535	7	26855	27733	R	24297338	-	RHE_RS29535	WP_029875515.1	292			MULTISPECIES: response regulator	5686		RHE_RS14875	6	3045950	3046660	D	24301275	-	RHE_RS14875	WP_011426154.1	236	COG1802	K	GntR family transcriptional regulator	2863
RHE_RS01410	R	RHE_RS01410_m3	R	-80	-57	ATTTATCTTGATGTAGAGATTCTT	21.7	4.6e-11	-23802	10337		RHE_RS12125	RHE_RS27050							RHE_RS29205	7	598951	599604	D	24302802	-	RHE_RS29205	WP_011428836.1	217	COG4566	TK	DNA-binding response regulator	5621		RHE_RS14870	6	3044594	3045682	R	24301593	-	RHE_RS14870	WP_011426153.1	362	COG3842	E	ABC transporter ATP-binding protein	2862
RHE_RS01410	R	RHE_RS01410_m3	R	-43	-20	AGATATCTTGACGTCAAGATAAAC	22.9	1.3e-11	-25066	10886		RHE_RS12200	RHE_RS27185							RHE_RS28340	7	415548	416246	D	24302975	-	RHE_RS28340	WP_011428673.1	232	COG1802	K	GntR family transcriptional regulator	5454		RHE_RS14700	6	3005318	3006247	D	24301632	-	RHE_RS14700	WP_011426120.1	309	COG2267	I	alpha/beta hydrolase	2828
RHE_RS05940	D	RHE_RS01410_m3	D	-72	-49	GACTACTTTGACGTGAAAATACAT	6.8	1.3e-06	-13553	5886		RHE_RS12205	RHE_RS27195							RHE_RS26235	7	467111	468082	R	24302316	-	RHE_RS26235	WP_042119911.1	323	COG4977	K	GlxA family transcriptional regulator	5038		RHE_RS14145	6	2880587	2881504	D	24297963	-	RHE_RS14145	WP_011426010.1	305	COG0454	KR	GNAT family N-acetyltransferase	2721
RHE_RS06025	R	RHE_RS01410_m3	R	-31	-8	ATTTCTATTGATATCAATGTATTT	2.5	9.7e-06	-11543	5013		RHE_RS12285	RHE_RS27240							RHE_RS25835	7	382223	382942	D	24302396	-	RHE_RS25835	WP_042119925.1	239	COG2186	K	FadR family transcriptional regulator	4958		RHE_RS13695	6	2788896	2789852	D	24300550	-	RHE_RS13695	WP_042118706.1	318	COG0583	K	LysR family transcriptional regulator	2634
RHE_RS06030	D	RHE_RS01410_m3	D	-84	-61	ATTTCTATTGATATCAATGTATTT	2.5	9.7e-06	-11543	5013		RHE_RS12325	RHE_RS27280							RHE_RS24850	7	188188	189024	D	24302593	-	RHE_RS24850	WP_011428015.1	278	COG1917	R	AraC family transcriptional regulator	4768		RHE_RS13340	6	2716921	2718408	R	24300251	-	RHE_RS13340	WP_011425855.1	495	COG5434	G	polysaccharidase	2568
RHE_RS06495	R	RHE_RS01410_m3	R	-269	-246	GATTGACTTTAAATCAAGGTAAAT	7.7	8.3e-07	-14002	6081		RHE_RS12330	RHE_RS27310							RHE_RS22955	7	18010	18705	D	24302258	-	RHE_RS22955	WP_011427648.1	231	COG1802	K	MULTISPECIES: GntR family transcriptional regulator	4393		RHE_RS13075	6	2666928	2667488	R	24297883	-	RHE_RS13075	WP_011425809.1	186	COG0377	C	NADH-quinone oxidoreductase subunit B 2	2521
RHE_RS15405	R	RHE_RS01410_m3	R	-80	-57	AGTAATATTGACGTAAATCTACGC	3.7	5.7e-06	-12075	5244		RHE_RS12340	RHE_RS27415							RHE_RS22090	7	18664	19437	D	24302024	-	RHE_RS22090	WP_011427484.1	257	COG1349	KG	DeoR/GlpR transcriptional regulator	4228		RHE_RS12415	6	2540212	2540535	R	24300307	-	RHE_RS12415	WP_011425688.1	107	COG0640	K	MULTISPECIES: transcriptional regulator	2398
RHE_RS18680	D	RHE_RS01410_m3	D	-88	-65	TTTTATCGTCATATCAAGATGTAT	7.6	9.2e-07	-13899	6036		RHE_RS12345	RHE_RS27460							RHE_RS20460	7	4235959	4236714	D	24301195	-	RHE_RS20460	WP_011427189.1	251	COG2197	TK	LuxR family transcriptional regulator	3944		RHE_RS11355	6	2324233	2324745	D	24300016	-	RHE_RS11355	WP_011425482.1	170	COG2823	S	BON domain-containing protein	2194
RHE_RS25970	R	RHE_RS01410_m3	R	-64	-41	GAAAATTTTCACCACAAGATAATT	6.8	1.3e-06	-13553	5886		RHE_RS12380	RHE_RS27470							RHE_RS17170	7	3526070	3526534	R	24297922	-	RHE_RS17170	WP_011426590.1	154	COG1846	K	MarR family transcriptional regulator	3305		RHE_RS10990	6	2251363	2253624	R	24300329	-	RHE_RS10990	WP_011425414.1	753			diguanylate cyclase	2124
RHE_RS01410	R	RHE_RS01410_m4	R	-81	-56	AATTTATCTTGATGTAGAGATTCTTG	22.8	1.5e-11	-24923	10824		RHE_RS12415	RHE_RS27525							RHE_RS15225	7	3118119	3118412	D	24300427	-	RHE_RS15225	WP_011426219.1	97	COG0640	K	transcriptional regulator	2932		RHE_RS10960	6	2243950	2244699	R	24297483	-	RHE_RS10960	WP_073990381.1	249			GntR family transcriptional regulator	2118
RHE_RS01410	R	RHE_RS01410_m4	R	-44	-19	TAGATATCTTGACGTCAAGATAAACT	23.9	4.1e-12	-26220	11387		RHE_RS12420	RHE_RS27570							RHE_RS12990	7	2651656	2652150	D	24298699	-	RHE_RS12990	WP_011425794.1	164	COG1846	K	MarR family transcriptional regulator	2505		RHE_RS10375	6	2117600	2119006	D	24300056	-	RHE_RS10375	WP_011425293.1	468	COG2114	T	adenylate/guanylate cyclase domain-containing protein	1999
RHE_RS05940	D	RHE_RS01410_m4	D	-73	-48	GGACTACTTTGACGTGAAAATACATT	5.1	2.6e-06	-12860	5585		RHE_RS12440	RHE_RS27645							RHE_RS12915	7	2635614	2636633	D	24299323	-	RHE_RS12915	WP_042118637.1	339	COG4977	K	GlxA family transcriptional regulator	2491		RHE_RS09210	6	1889285	1889488	D	24299889	-	RHE_RS09210	WP_011425094.1	67	COG3237	S	MULTISPECIES: CsbD family protein	1776
RHE_RS06495	R	RHE_RS01410_m4	R	-270	-245	TGATTGACTTTAAATCAAGGTAAATT	6.8	1.1e-06	-13720	5959		RHE_RS12520	RHE_RS27750							RHE_RS12415	7	2540212	2540535	R	24300307	-	RHE_RS12415	WP_011425688.1	107	COG0640	K	MULTISPECIES: transcriptional regulator	2398		RHE_RS09045	6	1856155	1856616	R	24301418	-	RHE_RS09045	WP_011425061.1	153	COG1522	K	Lrp/AsnC family transcriptional regulator	1742
RHE_RS15405	R	RHE_RS01410_m4	R	-81	-56	CAGTAATATTGACGTAAATCTACGCA	3.4	5.7e-06	-12075	5244		RHE_RS12575	RHE_RS27845							RHE_RS12205	7	2500863	2501330	D	24297934	-	RHE_RS12205	WP_011425648.1	155	COG1846	K	MarR family transcriptional regulator	2360		RHE_RS08955	6	1832693	1833958	D	24299639	-	RHE_RS08955	WP_011425043.1	421	COG1752	R	alpha/beta hydrolase	1725
RHE_RS18680	D	RHE_RS01410_m4	D	-89	-64	GTTTTATCGTCATATCAAGATGTATA	6.6	1.3e-06	-13553	5886		RHE_RS12585	RHE_RS27920							RHE_RS04625	7	967977	968627	R	24298246	-	RHE_RS04625	WP_011424266.1	216	COG1802	K	GntR family transcriptional regulator	887		RHE_RS08125	6	1671670	1674087	D	24298226	-	RHE_RS08125	WP_011424914.1	805	COG0466	O	endopeptidase La	1570
RHE_RS25970	R	RHE_RS01410_m4	R	-65	-40	CGAAAATTTTCACCACAAGATAATTA	5.3	2.4e-06	-12940	5620		RHE_RS12605	RHE_RS27930							RHE_RS03430	7	697768	698439	D	24300610	-	RHE_RS03430	WP_011424043.1	223	COG0745	TK	DNA-binding response regulator	656		RHE_RS07835	6	1613145	1613492	R	24297649	-	RHE_RS07835	WP_011424866.1	115	COG0784	T	response regulator	1517
RHE_RS01410	R	RHE_RS01410_m5	R	-37	-26	CTTGACGTCAAG	16.0	7.9e-08	-16354	7102		RHE_RS12620	RHE_RS27935							RHE_RS02855	7	585662	586219	D	24301089	-	RHE_RS02855	WP_020920333.1	185	COG1309	K	TetR family transcriptional regulator	544		RHE_RS07210	6	1483268	1483582	D	24301684	-	RHE_RS07210	WP_011424747.1	104	COG0640	K	ArsR family transcriptional regulator	1391
RHE_RS05330	R	RHE_RS01410_m5	R	-32	-21	CTTGACATCGAG	6.6	8.2e-06	-11711	5086		RHE_RS12670	RHE_RS28010							RHE_RS01740	7	354643	355554	D	24298621	-	RHE_RS01740	WP_011423728.1	303	COG0583	K	LysR family transcriptional regulator	329		RHE_RS07110	6	1466681	1467166	D	24300132	-	RHE_RS07110	WP_042118173.1	161	COG0784	T	response regulator	1371
RHE_RS26875	R	RHE_RS01410_m5	R	-99	-88	CTTGACATCAAT	8.0	4.5e-06	-12311	5347		RHE_RS12760	RHE_RS28020							RHE_RS01720	7	350268	350945	R	24299399	-	RHE_RS01720	WP_011423724.1	225	COG2186	K	FadR family transcriptional regulator	325		RHE_RS05965	6	1218412	1220037	D	24298833	-	RHE_RS05965	WP_011424503.1	541	COG1793	L	ATP-dependent DNA ligase	1141
RHE_RS01430	D	RHE_RS01430_m1	D	-66	-44	TTAATAGATGCATTTGCATATAA	20.5	8.8e-11	-23154	10056		RHE_RS12765	RHE_RS28160							RHE_RS32435	6	17399	18073	D	30584639	-	RHE_RS32435	WP_011053291.1	224			MULTISPECIES: transcriptional regulator	5678		RHE_RS05815	6	1190760	1191380	R	24297599	-	RHE_RS05815	WP_011424479.1	206	COG1309	K	transcriptional regulator BetI	1115
RHE_RS01430	D	RHE_RS01430_m1	D	-23	-1	AAGATAAATGTATTTGCATCTAT	19.0	7.3e-10	-21038	9137		RHE_RS12775	RHE_RS28305							RHE_RS30570	6	253590	254093	R	24297136	-	RHE_RS30570	WP_010069248.1	167	COG1396	K	MULTISPECIES: XRE family transcriptional regulator	5883		RHE_RS05380	6	1107313	1107603	D	24298126	-	RHE_RS05380	WP_011424398.1	96			CopG family transcriptional regulator	1033
RHE_RS18665	R	RHE_RS01430_m1	R	-53	-31	AAATTTGATGTACGTAAATCAAA	5.6	4.9e-06	-12226	5310		RHE_RS12800	RHE_RS28340							RHE_RS27750	6	274051	275121	D	24303093	-	RHE_RS27750	WP_011428563.1	356	COG1609	K	LacI family transcriptional regulator	5337		RHE_RS05300	6	1091974	1092381	D	24299920	-	RHE_RS05300	WP_020920646.1	135	COG3791	S	GFA family glutathione-dependent formaldehyde-activating protein	1020
RHE_RS27880	D	RHE_RS01430_m1	D	-36	-14	AAAGTCAATGCAGTTGCAATGGA	4.1	9.1e-06	-11607	5041		RHE_RS12810	RHE_RS28370							RHE_RS26840	6	83866	84222	D	24303275	-	RHE_RS26840	WP_011428390.1	118	COG0784	T	MULTISPECIES: response regulator	5157		RHE_RS04625	6	967977	968627	R	24298246	-	RHE_RS04625	WP_011424266.1	216	COG1802	K	GntR family transcriptional regulator	887
RHE_RS01430	D	RHE_RS01430_m2	D	-66	-52	TTAATAGATGCATTT	12.8	4.6e-07	-14592	6337		RHE_RS12840	RHE_RS28450							RHE_RS26800	6	73942	74334	D	24303283	-	RHE_RS26800	WP_011428384.1	130	COG0784	T	response regulator	5149		RHE_RS04575	6	957245	957694	D	24298570	-	RHE_RS04575	WP_011424256.1	149	COG1733	K	transcriptional regulator	877
RHE_RS01430	D	RHE_RS01430_m2	D	-23	-9	AAGATAAATGTATTT	13.2	3.1e-07	-14987	6509		RHE_RS12915	RHE_RS28510							RHE_RS25290	6	272834	273556	D	24302505	-	RHE_RS25290	WP_011428097.1	240	COG2186	K	FadR family transcriptional regulator	4851		RHE_RS04155	6	864620	865330	D	24297529	-	RHE_RS04155	WP_011424175.1	236	COG0625	O	glutathione S-transferase	794
RHE_RS12990	D	RHE_RS01430_m2	D	-45	-31	GAGATATATGTAGTC	8.6	8.6e-06	-11664	5066		RHE_RS12920	RHE_RS28555							RHE_RS19300	6	4004411	4004989	R	24301642	-	RHE_RS19300	WP_011426976.1	192	COG1309	K	TetR/AcrR family transcriptional regulator	3714		RHE_RS03950	6	820447	821463	D	24298701	-	RHE_RS03950	WP_011424135.1	338	COG3547	X	IS110 family transposase ISRel7	754
RHE_RS17595	R	RHE_RS01430_m2	R	-39	-25	TCGATAAATGCAATT	11.7	1.1e-06	-13720	5959		RHE_RS12940	RHE_RS28625							RHE_RS17450	6	3590784	3591827	D	24299449	-	RHE_RS17450	WP_011426640.1	347	COG1609	K	LacI family transcriptional regulator	3353		RHE_RS02680	6	549162	549443	R	24298339	-	RHE_RS02680	WP_041678811.1	93			MULTISPECIES: hypothetical protein	510
RHE_RS01430	D	RHE_RS01430_m3	D	-65	-53	TAATAGATGCATT	10.2	5.9e-06	-12041	5229		RHE_RS12975	RHE_RS28695							RHE_RS15995	6	3277045	3277941	D	24300166	-	RHE_RS15995	WP_042118871.1	298	COG0583	K	LysR family transcriptional regulator	3077		RHE_RS02420	6	490348	491973	R	24300558	-	RHE_RS02420	WP_011423855.1	541	COG0166	G	glucose-6-phosphate isomerase	460
RHE_RS01430	D	RHE_RS01430_m3	D	-16	-4	ATGTATTTGCATC	10.6	3.8e-06	-12481	5420		RHE_RS12990	RHE_RS28710							RHE_RS15070	6	3073946	3074740	R	24300822	-	RHE_RS15070	WP_011426189.1	264	COG2207	K	AraC family transcriptional regulator	2901		RHE_RS02045	6	417495	419054	D	24298077	rpoN	RHE_RS02045	WP_011423785.1	519	COG1508	K	RNA polymerase sigma-54 factor	390
RHE_RS15675	D	RHE_RS01430_m3	D	-97	-85	AAGCAACTGCATC	9.7	9.1e-06	-11607	5041		RHE_RS13060	RHE_RS28725							RHE_RS14115	6	2872027	2872935	R	24298049	-	RHE_RS14115	WP_011426004.1	302	COG4977	K	AraC family transcriptional regulator	2715		RHE_RS01495	6	302165	302695	R	24297845	-	RHE_RS01495	WP_011423679.1	176	COG0262	H	deaminase reductase	283
RHE_RS15890	D	RHE_RS01430_m3	D	-26	-14	ATATAAATGCATT	11.3	1.8e-06	-13228	5745		RHE_RS13075	RHE_RS28890							RHE_RS10445	6	2131364	2132251	R	24299905	-	RHE_RS10445	WP_011425307.1	295	COG2207	K	AraC family transcriptional regulator	2014		RHE_RS01300	6	268633	269616	D	24301615	-	RHE_RS01300	WP_011423642.1	327	COG1633	P	membrane protein	246
RHE_RS27880	D	RHE_RS01430_m3	D	-29	-17	ATGCAGTTGCAAT	10.4	4.5e-06	-12311	5347		RHE_RS13090	RHE_RS28900							RHE_RS01095	6	228427	228777	D	24299497	-	RHE_RS01095	WP_011423607.1	116	COG1846	K	MULTISPECIES: MarR family transcriptional regulator	206		RHE_RS01170	6	246632	246922	D	24299265	-	RHE_RS01170	WP_042117732.1	96			DUF982 domain-containing protein	221
RHE_RS01430	D	RHE_RS01430_m4	D	-65	-42	TAATAGATGCATTTGCATATAATA	22.6	3.5e-12	-26378	11456		RHE_RS13110	RHE_RS29075							RHE_RS00285	6	56550	57128	R	24299273	-	RHE_RS00285	WP_011423459.1	192	COG4567	TK	MULTISPECIES: DNA-binding response regulator	55		RHE_RS00690	6	143833	144780	R	24297998	-	RHE_RS00690	WP_020920077.1	315	COG0679	R	AEC family transporter	128
RHE_RS18665	R	RHE_RS01430_m4	R	-55	-32	AATTTGATGTACGTAAATCAAAAA	4.8	5.4e-06	-12129	5268		RHE_RS13115	RHE_RS29195							RHE_RS27845	5	295763	296230	R	24303074	-	RHE_RS27845	WP_011428579.1	155	COG1522	K	Lrp/AsnC family transcriptional regulator	5358		RHE_RS32435	5	17399	18073	D	30584639	-	RHE_RS32435	WP_011053291.1	224			MULTISPECIES: transcriptional regulator	5678
RHE_RS01430	D	RHE_RS01430_m5	D	-62	-41	TAGATGCATTTGCATATAATAG	18.5	5.3e-10	-21358	9276		RHE_RS13150	RHE_RS29200							RHE_RS27050	5	125727	126500	D	24303233	-	RHE_RS27050	WP_011428428.1	257	COG0664	T	Crp/Fnr family transcriptional regulator	5197		RHE_RS32060	5	140228	141046	R	30584564	-	RHE_RS32060	WP_011427417.1	272			MULTISPECIES: hypothetical protein	4162
RHE_RS01720	R	RHE_RS01430_m5	R	-316	-295	CAGATGCAAGTAGAAATACCCT	9.3	4.4e-06	-12334	5357		RHE_RS13180	RHE_RS29205							RHE_RS26635	5	44455	45159	D	24303316	-	RHE_RS26635	WP_011428354.1	234	COG2186	K	MULTISPECIES: transcriptional regulator NanR	5117		RHE_RS30775	5	290726	291037	R	24297306	-	RHE_RS30775	WP_011053458.1	103			MULTISPECIES: hypothetical protein	5917
RHE_RS14990	R	RHE_RS01430_m5	R	-280	-259	GCGATGCACTTGATTTTATTGA	9.2	4.8e-06	-12247	5319		RHE_RS13190	RHE_RS29335							RHE_RS26040	5	422939	423802	D	24302355	-	RHE_RS26040	WP_042119901.1	287	COG1737	K	MULTISPECIES: MurR/RpiR family transcriptional regulator	4998		RHE_RS30745	5	285210	285884	R	24297464	-	RHE_RS30745	WP_029875595.1	224			MULTISPECIES: transcriptional regulator	5912
RHE_RS16425	D	RHE_RS01480_m1	D	-18	-8	GCCGGAGAAGA	10.9	4.2e-06	-12380	5377		RHE_RS13215	RHE_RS29400							RHE_RS18680	5	3868538	3869218	D	24298133	-	RHE_RS18680	WP_011426866.1	226	COG1309	K	TetR/AcrR family transcriptional regulator	3597		RHE_RS30715	5	279761	280471	D	24297323	-	RHE_RS30715	WP_008536495.1	236			MULTISPECIES: nitrogen fixation protein NifQ	5906
RHE_RS17955	R	RHE_RS01480_m1	R	-41	-31	GGCGGAGACTA	10.1	8.8e-06	-11641	5056		RHE_RS13220	RHE_RS29535							RHE_RS17840	5	3677794	3678330	D	24300876	-	RHE_RS17840	WP_011426714.1	178	COG1396	K	XRE family transcriptional regulator	3430		RHE_RS29820	5	84985	86496	D	24297234	-	RHE_RS29820	WP_029875549.1	503			MULTISPECIES: monooxygenase	5741
RHE_RS23555	D	RHE_RS01480_m1	D	-13	-3	GGCGGAGACCA	11.2	3.1e-06	-12684	5509		RHE_RS13235	RHE_RS29630							RHE_RS13695	5	2788896	2789852	D	24300550	-	RHE_RS13695	WP_042118706.1	318	COG0583	K	LysR family transcriptional regulator	2634		RHE_RS28870	5	531041	531715	D	24302869	-	RHE_RS28870	WP_011428775.1	224	COG1376	M	L,D-transpeptidase	5558
RHE_RS24425	D	RHE_RS01480_m1	D	-63	-53	GCCGGAGACCG	10.3	6.9e-06	-11884	5161		RHE_RS13240	RHE_RS29775							RHE_RS12620	5	2582103	2582894	D	24300665	-	RHE_RS12620	WP_042118605.1	263	COG2207	K	AraC family transcriptional regulator	2435		RHE_RS28730	5	494177	495604	D	24302897	-	RHE_RS28730	WP_011428747.1	475			glucoamylase	5530
RHE_RS05085	R	RHE_RS01480_m3	R	-259	-240	AGCGGCAGGGGCACCCCCGT	12.2	7.6e-07	-14090	6119		RHE_RS13255	RHE_RS29835							RHE_RS11860	5	2418634	2419485	R	24300367	-	RHE_RS11860	WP_020921417.1	283	COG2207	K	AraC family transcriptional regulator	2293		RHE_RS28450	5	439096	439983	R	24302953	-	RHE_RS28450	WP_011428693.1	295	COG0583	K	LysR family transcriptional regulator	5476
RHE_RS14860	R	RHE_RS01480_m3	R	-191	-172	AGCGGGGAGAAGATGCCCGA	9.8	7.1e-06	-11855	5149		RHE_RS13265	RHE_RS29840							RHE_RS09080	5	1862137	1862796	D	24298071	-	RHE_RS09080	WP_011425068.1	219	COG3806	T	transcriptional regulator	1749		RHE_RS28020	5	344627	345355	D	24303039	-	RHE_RS28020	WP_020919624.1	242	COG2186	K	FadR family transcriptional regulator	5391
RHE_RS26150	D	RHE_RS01480_m3	D	-31	-12	AGCGGCATGCCGATCCCCCT	12.5	5.3e-07	-14450	6276		RHE_RS13275	RHE_RS29975							RHE_RS09015	5	1849974	1850549	D	24300362	-	RHE_RS09015	WP_011425055.1	191	COG1309	K	TetR/AcrR family transcriptional regulator	1737		RHE_RS27815	5	291151	291603	D	24303080	-	RHE_RS27815	WP_011428573.1	150			hypothetical protein	5352
RHE_RS30630	D	RHE_RS01480_m3	D	-54	-35	ACCGGTTGGACTAGGCCCGT	11.9	1.0e-06	-13816	6000		RHE_RS13295	RHE_RS30095							RHE_RS06555	5	1328613	1329173	D	24301122	-	RHE_RS06555	WP_011424620.1	186	COG1309	K	TetR/AcrR family transcriptional regulator	1259		RHE_RS27415	5	199438	199935	D	24303160	-	RHE_RS27415	WP_011428497.1	165	COG1522	K	Lrp/AsnC family transcriptional regulator	5272
RHE_RS14000	D	RHE_RS01480_m4	D	-256	-239	CCCATGTCAGCGGCAGTC	8.6	7.3e-06	-11828	5137		RHE_RS13300	RHE_RS30285							RHE_RS23540	4	148583	149104	D	24302141	-	RHE_RS23540	WP_011427764.1	173	COG1595	K	RNA polymerase sigma factor	4508		RHE_RS27360	5	187867	189684	D	24303171	-	RHE_RS27360	WP_042119987.1	605	COG0840	NT	methyl-accepting chemotaxis protein	5261
RHE_RS01480	D	RHE_RS01480_m5	D	-103	-83	GCACGTGGCTTTGATATTCCC	9.5	9.1e-06	-11607	5041		RHE_RS13340	RHE_RS30310							RHE_RS23350	4	106295	107344	R	24302179	-	RHE_RS23350	WP_042119731.1	349	COG1609	K	LacI family transcriptional regulator	4473		RHE_RS27280	5	171608	172357	R	24303187	-	RHE_RS27280	WP_011428471.1	249	COG1802	K	GntR family transcriptional regulator	5247
RHE_RS17050	D	RHE_RS01480_m5	D	-188	-168	GAACGCCTTTTTGAGATTCCT	9.4	9.1e-06	-11607	5041		RHE_RS13370	RHE_RS30470							RHE_RS19670	4	4069010	4070029	R	24300942	-	RHE_RS19670	WP_073990398.1	339	COG1609	K	LacI family transcriptional regulator	3786		RHE_RS27185	5	152553	153446	D	24303206	-	RHE_RS27185	WP_042119981.1	297	COG0583	K	LysR family transcriptional regulator	5227
RHE_RS17090	D	RHE_RS01480_m5	D	-57	-37	TAACGCGGGGGCGCGTTTCCA	9.3	9.8e-06	-11533	5009		RHE_RS13400	RHE_RS30570							RHE_RS16135	4	3308142	3309131	D	24298485	-	RHE_RS16135	WP_011426389.1	329	COG2207	K	AraC family transcriptional regulator	3104		RHE_RS27180	5	151711	152451	R	24303207	-	RHE_RS27180	WP_011428452.1	246	COG1028	IQR	KR domain-containing protein	5226
RHE_RS17940	D	RHE_RS01480_m5	D	-250	-230	GAACGCCGCTCTGCCTTTCCG	12.3	6.5e-07	-14246	6187		RHE_RS13430	RHE_RS30745							RHE_RS12065	4	2469254	2470249	D	24297829	-	RHE_RS12065	WP_011425621.1	331	COG1609	K	LacI family transcriptional regulator	2332		RHE_RS26495	5	14842	15837	R	24303344	-	RHE_RS26495	WP_042119940.1	331	COG0583	K	LysR family transcriptional regulator	5089
RHE_RS01655	R	RHE_RS01660_m2	R	-104	-84	TCGCCTAATAATAATAGGGAA	20.7	1.0e-10	-23026	10000		RHE_RS13440	RHE_RS31500							RHE_RS07210	4	1483268	1483582	D	24301684	-	RHE_RS07210	WP_011424747.1	104	COG0640	K	ArsR family transcriptional regulator	1391		RHE_RS26235	5	467111	468082	R	24302316	-	RHE_RS26235	WP_042119911.1	323	COG4977	K	GlxA family transcriptional regulator	5038
RHE_RS01660	D	RHE_RS01660_m2	D	-33	-13	TCGCCTAATAATAATAGGGAA	20.7	1.0e-10	-23026	10000		RHE_RS13495	RHE_RS32370							RHE_RS05170	4	1069095	1069712	R	24298407	-	RHE_RS05170	WP_011424365.1	205	COG1309	K	TetR/AcrR family transcriptional regulator	994		RHE_RS26000	5	415886	416785	R	24302363	-	RHE_RS26000	WP_011428230.1	299	COG4977	K	AraC family transcriptional regulator	4990
RHE_RS14170	R	RHE_RS01660_m2	R	-256	-236	TATCCTATTTAAAAGAGATTA	6.2	6.6e-06	-11928	5180		RHE_RS13505	RHE_RS32435							RHE_RS02710	4	554463	555134	R	24301630	-	RHE_RS02710	WP_011423907.1	223	COG2932	X	helix-turn-helix transcriptional regulator	515		RHE_RS25890	5	395058	395939	R	24302385	-	RHE_RS25890	WP_011428212.1	293	COG1175	G	sugar ABC transporter permease	4969
RHE_RS14175	D	RHE_RS01660_m2	D	-200	-180	TATCCTATTTAAAAGAGATTA	6.2	6.6e-06	-11928	5180		RHE_RS13525	RHE_RS32555							RHE_RS14905	3	3049332	3050057	D	24301058	-	RHE_RS14905	WP_020921838.1	241	COG2771	K	LuxR family transcriptional regulator	2869		RHE_RS25290	5	272834	273556	D	24302505	-	RHE_RS25290	WP_011428097.1	240	COG2186	K	FadR family transcriptional regulator	4851
RHE_RS20575	D	RHE_RS01660_m2	D	-276	-256	TTTCCTCATATTTTTATGATA	6.0	7.7e-06	-11774	5114		RHE_RS13545	RHE_RS32675							RHE_RS18650	2	3860249	3861280	D	24297893	-	RHE_RS18650	WP_011426860.1	343	COG1609	K	LacI family transcriptional regulator	3591		RHE_RS25120	5	247104	247418	R	24302539	-	RHE_RS25120	WP_011428066.1	104			hypothetical protein	4820
RHE_RS29615	R	RHE_RS01660_m2	R	-202	-182	TCGCACTATAAGAATAGGGTA	5.8	8.1e-06	-11724	5092		RHE_RS13630	RHE_RS33140																						RHE_RS24760	5	170016	170915	D	24302611	-	RHE_RS24760	WP_011428000.1	299	COG0583	K	LysR family transcriptional regulator	4752
RHE_RS01655	R	RHE_RS01660_m3	R	-71	-48	AAAATTATATAAAGATAGAAACGA	16.4	9.5e-09	-18472	8022		RHE_RS13675																							RHE_RS24755	5	169034	169897	R	24302612	-	RHE_RS24755	WP_011427999.1	287	COG0702	R	NmrA family transcriptional regulator	4751
RHE_RS01655	R	RHE_RS01660_m3	R	-69	-46	GCAAAATTATATAAAGATAGAAAC	20.1	1.4e-10	-22689	9854		RHE_RS13695																							RHE_RS24320	5	72348	73157	R	24302699	pcaD	RHE_RS24320	WP_011427917.1	269	COG2267	I	3-oxoadipate enol-lactonase	4662
RHE_RS01660	D	RHE_RS01660_m3	D	-71	-48	GCAAAATTATATAAAGATAGAAAC	20.1	1.4e-10	-22689	9854		RHE_RS13735															RHE_RS20580	WP_011427212.1	287	COG0568	K	MULTISPECIES: RNA polymerase factor sigma-32			RHE_RS23945	5	231024	232037	R	24302060	-	RHE_RS23945	WP_041678980.1	337	COG1609	K	LacI family transcriptional regulator	4591
RHE_RS01660	D	RHE_RS01660_m3	D	-69	-46	AAAATTATATAAAGATAGAAACGA	16.4	9.5e-09	-18472	8022		RHE_RS13750															RHE_RS26695	WP_086005055.1	169	COG1595	K	RNA polymerase subunit sigma-70			RHE_RS23555	5	152562	153632	D	24302138	-	RHE_RS23555	WP_042119751.1	356	COG1609	K	LacI family DNA-binding transcriptional regulator	4511
RHE_RS02330	R	RHE_RS01660_m3	R	-323	-300	TTAATGATCTATGATGATAAACGT	7.3	5.7e-06	-12075	5244		RHE_RS13755															RHE_RS26680	WP_011428363.1	175	COG1595	K	RNA polymerase sigma factor			RHE_RS23540	5	148583	149104	D	24302141	-	RHE_RS23540	WP_011427764.1	173	COG1595	K	RNA polymerase sigma factor	4508
RHE_RS03610	D	RHE_RS01660_m3	D	-59	-36	GTGAATTTGTAAAATTTTGTAAAC	8.6	2.9e-06	-12751	5538		RHE_RS13770															RHE_RS15090	WP_011426193.1	685	COG0568	K	MULTISPECIES: RNA polymerase sigma factor RpoD			RHE_RS22260	5	54398	55387	R	24301990	-	RHE_RS22260	WP_011427517.1	329	COG1063	ER	oxidoreductase	4262
RHE_RS06405	D	RHE_RS01660_m3	D	-347	-324	GCCATTTTTTCTCAAGAAAAACGA	6.5	8.9e-06	-11629	5051		RHE_RS13775															RHE_RS17090	WP_011426574.1	302	COG0568	K	RNA polymerase sigma factor RpoH			RHE_RS22020	5	5454	6176	D	24302038	-	RHE_RS22020	WP_011427471.1	240	COG1802	K	GntR family transcriptional regulator	4215
RHE_RS06635	R	RHE_RS01660_m3	R	-128	-105	TTAACTATTTATATTTCTGAATTT	6.8	7.6e-06	-11787	5119		RHE_RS13800															RHE_RS03775	WP_042117931.1	201	COG1595	K	RNA polymerase sigma factor			RHE_RS22015	5	4885	5271	R	24302039	-	RHE_RS22015	WP_011427470.1	128			DUF2934 domain-containing protein	4214
RHE_RS11860	R	RHE_RS01660_m3	R	-217	-194	GAATCAGTATCTAAAGAAAAACTC	9.0	2.2e-06	-13027	5658		RHE_RS13810															RHE_RS32370	WP_011428767.1	218	COG1595	K	RNA polymerase sigma factor			RHE_RS20885	5	4330986	4331423	D	24299194	-	RHE_RS20885	WP_008528622.1	145	COG3824	O	MULTISPECIES: Zn-dependent protease	4027
RHE_RS01655	R	RHE_RS01660_m4	R	-104	-84	TCGCCTAATAATAATAGGGAA	21.6	2.2e-11	-24540	10658		RHE_RS13835															RHE_RS15675	WP_011426302.1	169	COG1595	K	RNA polymerase sigma factor			RHE_RS20060	5	4151972	4152886	R	24300316	-	RHE_RS20060	WP_042119077.1	304	COG0583	K	LysR family transcriptional regulator	3863
RHE_RS01660	D	RHE_RS01660_m4	D	-33	-13	TCGCCTAATAATAATAGGGAA	21.6	2.2e-11	-24540	10658		RHE_RS13880															RHE_RS02045	WP_011423785.1	519	COG1508	K	RNA polymerase sigma-54 factor			RHE_RS19425	5	4026829	4027188	R	24300902	-	RHE_RS19425	WP_010028815.1	119	COG2204	T	MULTISPECIES: response regulator	3738
RHE_RS06320	D	RHE_RS01660_m4	D	-272	-252	CTGCCTCTTAGTTAAAGGCGC	6.1	7.1e-06	-11855	5149		RHE_RS13930															RHE_RS28625	WP_011428727.1	236	COG1595	K	RNA polymerase sigma factor			RHE_RS19300	5	4004411	4004989	R	24301642	-	RHE_RS19300	WP_011426976.1	192	COG1309	K	TetR/AcrR family transcriptional regulator	3714
RHE_RS14170	R	RHE_RS01660_m4	R	-256	-236	TATCCTATTTAAAAGAGATTA	6.5	5.8e-06	-12058	5237		RHE_RS13955															RHE_RS20110	WP_011427123.1	186	COG1595	K	RNA polymerase sigma factor RpoE			RHE_RS18240	5	3764888	3765892	D	24299178	-	RHE_RS18240	WP_011426787.1	334	COG0385	R	bile acid:sodium symporter	3510
RHE_RS14175	D	RHE_RS01660_m4	D	-200	-180	TATCCTATTTAAAAGAGATTA	6.5	5.8e-06	-12058	5237		RHE_RS13970															RHE_RS23540	WP_011427764.1	173	COG1595	K	RNA polymerase sigma factor			RHE_RS18235	5	3763946	3764800	R	24299179	-	RHE_RS18235	WP_042119009.1	284	COG0583	K	LysR family transcriptional regulator	3509
RHE_RS20575	D	RHE_RS01660_m4	D	-276	-256	TTTCCTCATATTTTTATGATA	7.7	3.2e-06	-12652	5495		RHE_RS14000																							RHE_RS17830	5	3676843	3677325	R	24297847	-	RHE_RS17830	WP_011426712.1	160	COG3832	S	ATPase	3428
RHE_RS01655	R	RHE_RS01660_m5	R	-72	-52	TTATATAAAGATAGAAACGAA	11.8	1.0e-06	-13816	6000		RHE_RS14100																							RHE_RS17515	5	3605481	3607022	R	24298537	-	RHE_RS17515	WP_042118970.1	513	COG0382	H	UbiA family prenyltransferase	3366
RHE_RS01655	R	RHE_RS01660_m5	R	-46	-26	TGATAATATTGCGGCGAGGGG	9.2	6.7e-06	-11913	5174		RHE_RS14115																							RHE_RS17145	5	3521414	3522322	D	24301330	-	RHE_RS17145	WP_011426585.1	302	COG0583	K	LysR family transcriptional regulator	3300
RHE_RS01660	D	RHE_RS01660_m5	D	-91	-71	TGATAATATTGCGGCGAGGGG	9.2	6.7e-06	-11913	5174		RHE_RS14135																							RHE_RS17090	5	3504521	3505429	D	24301374	-	RHE_RS17090	WP_011426574.1	302	COG0568	K	RNA polymerase sigma factor RpoH	3289
RHE_RS01660	D	RHE_RS01660_m5	D	-65	-45	TTATATAAAGATAGAAACGAA	11.8	1.0e-06	-13816	6000		RHE_RS14140																							RHE_RS16590	5	3409477	3410178	R	24298634	-	RHE_RS16590	WP_020922049.1	233	COG0692	L	uracil-DNA glycosylase	3191
RHE_RS03720	D	RHE_RS01660_m5	D	-40	-20	CTATATAGGTCTGAACAGGCA	9.4	5.8e-06	-12058	5237		RHE_RS14145																							RHE_RS16120	5	3303747	3304775	D	24298619	-	RHE_RS16120	WP_011426386.1	342	COG1609	K	LacI family DNA-binding transcriptional regulator	3101
RHE_RS10545	R	RHE_RS01660_m5	R	-128	-108	TTATAGTAATCCAGGGAGGAG	9.6	5.1e-06	-12186	5292		RHE_RS14150																							RHE_RS16040	5	3287061	3288200	D	24300003	-	RHE_RS16040	WP_042118874.1	379	COG1842	KT	PspA/IM30 family protein	3086
RHE_RS27525	D	RHE_RS01660_m5	D	-158	-138	TCATATGCAGCTTAAGAGGAA	9.8	4.7e-06	-12268	5328		RHE_RS14160																							RHE_RS15830	5	3240745	3242466	R	24301028	-	RHE_RS15830	WP_011426331.1	573	COG0366	G	alpha-glucosidase	3044
RHE_RS01720	R	RHE_RS01720_m1	R	-25	-8	ACTCATAAAGTCATCTGA	23.5	6.4e-12	-25775	11194		RHE_RS14170																							RHE_RS15210	5	3114974	3115441	R	24299723	-	RHE_RS15210	WP_020921868.1	155	COG1522	K	Lrp/AsnC family transcriptional regulator	2929
RHE_RS01720	R	RHE_RS01720_m2	R	-34	-7	TACTCATAAAGTCATCTGATGACTTTAT	34.1	3.7e-18	-40138	17432		RHE_RS14175																							RHE_RS14810	5	3029326	3030273	R	24298313	-	RHE_RS14810	WP_011426141.1	315	COG1175	G	sugar ABC transporter permease	2850
RHE_RS19300	R	RHE_RS01720_m2	R	-34	-7	ATCTCCAGAAATCATCTCTTGACAAAAT	-10.6	6.1e-06	-12007	5215		RHE_RS14185																							RHE_RS14750	5	3015627	3017012	R	24298877	-	RHE_RS14750	WP_011426130.1	461	COG1012	C	aldehyde dehydrogenase	2838
RHE_RS30715	D	RHE_RS01720_m2	D	-307	-280	CTATCGAAGAGACATATGATAACTCTAT	-11.9	8.7e-06	-11652	5060		RHE_RS14190																							RHE_RS14500	5	2957093	2959249	R	24299878	-	RHE_RS14500	WP_011426080.1	718	COG0272	L	DNA ligase (NAD(+)) LigA	2789
RHE_RS01720	R	RHE_RS01720_m3	R	-313	-295	CAGATGCAAGTAGAAATAC	11.0	1.7e-06	-13285	5770		RHE_RS14210																							RHE_RS13955	5	2838446	2839423	R	24300900	-	RHE_RS13955	WP_011425973.1	325	COG1840	P	Fe(3+) ABC transporter substrate-binding protein	2684
RHE_RS01720	R	RHE_RS01720_m3	R	-40	-22	CTGATGACTTTATGAGTAG	19.7	7.8e-12	-25577	11108		RHE_RS14280																							RHE_RS13835	5	2817215	2817616	R	24300937	-	RHE_RS13835	WP_042118711.1	133			hypothetical protein	2663
RHE_RS15090	R	RHE_RS01720_m3	R	-130	-112	GGGATGACATTTAAAGTCT	8.8	9.0e-06	-11618	5046		RHE_RS14295																							RHE_RS13525	5	2754032	2754976	D	24298483	-	RHE_RS13525	WP_011425891.1	314	COG1879	G	rhizopine-binding protein	2603
RHE_RS22960	D	RHE_RS01720_m3	D	-121	-103	GGTATGCCATAATGAATAA	10.7	2.2e-06	-13027	5658		RHE_RS14355																							RHE_RS13110	5	2674888	2675256	D	24301249	-	RHE_RS13110	WP_011425816.1	122			hypothetical protein	2528
RHE_RS01720	R	RHE_RS01720_m4	R	-34	-8	ACTCATAAAGTCATCTGATGACTTTAT	33.2	3.0e-17	-38045	16523		RHE_RS14395																							RHE_RS12990	5	2651656	2652150	D	24298699	-	RHE_RS12990	WP_011425794.1	164	COG1846	K	MarR family transcriptional regulator	2505
RHE_RS19300	R	RHE_RS01720_m4	R	-34	-8	TCTCCAGAAATCATCTCTTGACAAAAT	-9.7	4.9e-06	-12226	5310		RHE_RS14410																							RHE_RS12575	5	2572618	2573523	R	24297603	-	RHE_RS12575	WP_011425716.1	301	COG1175	G	MULTISPECIES: sugar ABC transporter permease	2427
RHE_RS30715	D	RHE_RS01720_m4	D	-306	-280	TATCGAAGAGACATATGATAACTCTAT	-10.1	5.6e-06	-12093	5252		RHE_RS14485																							RHE_RS12345	5	2529742	2531958	R	24299147	-	RHE_RS12345	WP_011425674.1	738			OmpA family protein	2384
RHE_RS01720	R	RHE_RS01720_m5	R	-37	-17	GTCATCTGATGACTTTATGAG	19.2	6.8e-10	-21109	9167		RHE_RS14500																							RHE_RS12125	5	2481141	2482979	D	24299238	-	RHE_RS12125	WP_011425633.1	612	COG1132	V	ABC transporter ATP-binding protein	2344
RHE_RS01720	R	RHE_RS01720_m5	R	-29	-9	CTCATAAAGTCATCTGATGAC	21.4	1.1e-10	-22931	9959		RHE_RS14575																							RHE_RS12120	5	2480463	2480864	R	24299958	-	RHE_RS12120	WP_011425632.1	133	COG3791	S	GFA family protein	2343
RHE_RS03040	R	RHE_RS01720_m5	R	-145	-125	CTCATCTAATCACGATAGGAA	0.8	8.3e-06	-11699	5081		RHE_RS14605																							RHE_RS11520	5	2354295	2355461	R	24297748	-	RHE_RS11520	WP_020921378.1	388	COG1104	E	cysteine desulfurase	2227
RHE_RS03045	D	RHE_RS01720_m5	D	-35	-15	CTCATCTAATCACGATAGGAA	0.8	8.3e-06	-11699	5081		RHE_RS14650																							RHE_RS11075	5	2270894	2271589	D	24299851	-	RHE_RS11075	WP_011425429.1	231	COG1309	K	TetR family transcriptional regulator	2139
RHE_RS27240	R	RHE_RS01740_m1	R	-69	-57	CAATACGAACTAA	10.2	8.4e-06	-11687	5076		RHE_RS14675																							RHE_RS10580	5	2158259	2159314	R	24299419	-	RHE_RS10580	WP_011425334.1	351	COG1609	K	LacI family transcriptional regulator	2042
RHE_RS01740	D	RHE_RS01740_m2	D	-27	-13	AATTCGAATTCGGAA	14.8	1.0e-07	-16118	7000		RHE_RS14700																							RHE_RS09225	5	1890531	1890848	D	24300475	-	RHE_RS09225	WP_011425096.1	105			membrane protein	1778
RHE_RS10545	R	RHE_RS01740_m2	R	-70	-56	AATTCGACTTCGATA	8.4	7.5e-06	-11801	5125		RHE_RS14750																							RHE_RS09025	5	1851350	1852318	D	24300916	-	RHE_RS09025	WP_011425057.1	322	COG0583	K	LysR family transcriptional regulator	1739
RHE_RS15700	D	RHE_RS01740_m2	D	-215	-201	AATTCGGGTTCCTCG	8.7	6.4e-06	-11959	5194		RHE_RS14760																							RHE_RS09005	5	1847811	1849067	D	24300091	-	RHE_RS09005	WP_011425053.1	418	COG3706	TK	GGDEF domain-containing protein	1735
RHE_RS08955	D	RHE_RS01740_m3	D	-276	-261	CCAGAAGATCGCCCTT	10.7	1.0e-06	-13816	6000		RHE_RS14765																							RHE_RS08960	5	1834204	1834737	R	24299638	-	RHE_RS08960	WP_042118293.1	177	COG2062	T	histidine phosphatase family protein	1726
RHE_RS24545	D	RHE_RS01740_m3	D	-21	-6	TCAGATAAGGGCAGTT	7.9	7.0e-06	-11870	5155		RHE_RS14770																							RHE_RS08855	5	1816659	1817156	R	24298230	-	RHE_RS08855	WP_011425025.1	165			hypothetical protein	1706
RHE_RS30525	D	RHE_RS01740_m4	D	-203	-184	TGTTGGACCTTCTCGATCTC	9.4	3.3e-06	-12622	5481		RHE_RS14810																							RHE_RS08370	5	1718846	1720030	R	24299493	-	RHE_RS08370	WP_011424950.1	394	COG2814	G	MULTISPECIES: MFS transporter	1614
RHE_RS09115	R	RHE_RS02045_m1	R	-312	-303	ACAAGCAATG	10.8	4.1e-06	-12405	5387		RHE_RS14860																							RHE_RS07235	5	1489115	1489738	D	24300925	-	RHE_RS07235	WP_011424752.1	207	COG1611	R	TIGR00730 family Rossman fold protein	1396
RHE_RS02045	D	RHE_RS02045_m2	D	-95	-74	AAAAGCAATTTTTGGGCCAACT	19.8	1.9e-10	-22384	9721		RHE_RS14870																							RHE_RS06690	5	1364081	1365745	D	24298051	-	RHE_RS06690	WP_011424647.1	554	COG0644	C	electron transfer flavoprotein-ubiquinone oxidoreductase	1286
RHE_RS31105	R	RHE_RS02045_m2	R	-204	-183	ACCAGCAAACGTCGTACCAAAT	11.7	4.5e-07	-14614	6347		RHE_RS14875																							RHE_RS06395	5	1300580	1300993	R	24300716	msrB	RHE_RS06395	WP_011424586.1	137	COG0229	O	peptide-methionine (R)-S-oxide reductase	1228
RHE_RS02045	D	RHE_RS02045_m3	D	-95	-74	AAAAGCAATTTTTGGGCCAACT	20.2	1.9e-10	-22384	9721		RHE_RS14905																							RHE_RS06320	5	1288871	1289290	D	24298122	-	RHE_RS06320	WP_011424572.1	139	COG0589	T	universal stress protein	1213
RHE_RS11360	D	RHE_RS02045_m3	D	-118	-97	AAAGGCAATGAAGCGGCCAGCT	5.4	9.5e-06	-11564	5022		RHE_RS14920																							RHE_RS06135	5	1251452	1252069	D	24299594	-	RHE_RS06135	WP_011424536.1	205	COG1309	K	TetR/AcrR family transcriptional regulator	1176
RHE_RS15210	R	RHE_RS02045_m3	R	-80	-59	GCAAGAAAGTTTCAAGCCGATG	5.6	8.6e-06	-11664	5066		RHE_RS14990																							RHE_RS05940	5	1210788	1213085	D	24298965	-	RHE_RS05940	WP_011424498.1	765	COG2203	T	bifunctional diguanylate cyclase/phosphodiesterase	1136
RHE_RS24615	R	RHE_RS02045_m3	R	-77	-56	GTATGCAATGGTCATGCCAGAA	7.6	3.0e-06	-12717	5523		RHE_RS15040																							RHE_RS05850	5	1197261	1198268	D	24300310	-	RHE_RS05850	WP_011424485.1	335	COG4448	E	asparaginase	1121
RHE_RS24620	D	RHE_RS02045_m3	D	-288	-267	GTATGCAATGGTCATGCCAGAA	7.6	3.0e-06	-12717	5523		RHE_RS15050																							RHE_RS05735	5	1173008	1173928	D	24299753	-	RHE_RS05735	WP_011424463.1	306	COG0583	K	LysR family transcriptional regulator	1099
RHE_RS31105	R	RHE_RS02045_m3	R	-204	-183	ACCAGCAAACGTCGTACCAAAT	7.7	3.0e-06	-12717	5523		RHE_RS15070																							RHE_RS05340	5	1100702	1101493	R	24301009	-	RHE_RS05340	WP_011424392.1	263	COG1028	IQR	SDR family NAD(P)-dependent oxidoreductase	1027
RHE_RS02045	D	RHE_RS02045_m4	D	-116	-106	CCGCTTGACCA	10.0	9.3e-06	-11585	5032		RHE_RS15090																							RHE_RS05170	5	1069095	1069712	R	24298407	-	RHE_RS05170	WP_011424365.1	205	COG1309	K	TetR/AcrR family transcriptional regulator	994
RHE_RS02330	R	RHE_RS02045_m4	R	-281	-271	CCGCTTGACAA	10.2	7.1e-06	-11855	5149		RHE_RS15135																							RHE_RS04705	5	983275	984273	D	24300325	-	RHE_RS04705	WP_011424280.1	332	COG0583	K	LysR family transcriptional regulator	902
RHE_RS03610	D	RHE_RS02045_m4	D	-24	-14	CTGCTTGTCAA	10.5	4.5e-06	-12311	5347		RHE_RS15155																							RHE_RS04700	5	982198	983130	R	24298951	-	RHE_RS04700	WP_011424279.1	310	COG0702	R	NmrA/HSCARG family protein	901
RHE_RS02045	D	RHE_RS02045_m5	D	-116	-102	CCGCTTGACCAAATG	17.5	1.2e-09	-20541	8921		RHE_RS15160																							RHE_RS04105	5	853917	854546	D	24298768	-	RHE_RS04105	WP_011424165.1	209	COG2818	L	DNA-3-methyladenine glycosylase I	784
RHE_RS02165	D	RHE_RS02165_m1	D	-117	-92	CCATTCAATTAATTAAGCAATTATCT	10.0	7.9e-07	-14051	6102		RHE_RS15180																							RHE_RS04025	5	837503	838144	D	24300269	-	RHE_RS04025	WP_011424149.1	213	COG1309	K	TetR/AcrR family transcriptional regulator	768
RHE_RS02165	D	RHE_RS02165_m1	D	-109	-84	TTAATTAAGCAATTATCTAATTACTT	24.1	1.5e-12	-27226	11824		RHE_RS15210																							RHE_RS03720	5	772463	772945	D	24300176	rirA	RHE_RS03720	WP_011424096.1	160	COG1959	K	MULTISPECIES: transcriptional regulator	710
RHE_RS02165	D	RHE_RS02165_m1	D	-70	-45	ATAATTAAGCAATACGTTAATTGCTT	21.9	2.4e-11	-24453	10620		RHE_RS15225																							RHE_RS03275	5	669101	669847	D	24300699	-	RHE_RS03275	WP_042117883.1	248	COG2771	K	LuxR family transcriptional regulator	625
RHE_RS12380	D	RHE_RS02165_m1	D	-100	-75	ATAGTTTCACAATTGGCGAACTATTT	9.2	1.3e-06	-13553	5886		RHE_RS15240																							RHE_RS03045	5	619566	619958	D	24299792	-	RHE_RS03045	WP_011423967.1	130	COG0251	V	RidA family protein	579
RHE_RS02165	D	RHE_RS02165_m2	D	-117	-88	CCATTCAATTAATTAAGCAATTATCTAATT	13.9	1.1e-08	-18325	7959		RHE_RS15350																							RHE_RS03040	5	618817	619410	R	24299793	-	RHE_RS03040	WP_042117869.1	197	COG1309	K	TetR/AcrR family transcriptional regulator	578
RHE_RS02165	D	RHE_RS02165_m2	D	-113	-84	TCAATTAATTAAGCAATTATCTAATTACTT	1.3	9.8e-06	-11533	5009		RHE_RS15395																							RHE_RS02790	5	568644	569201	R	24298844	-	RHE_RS02790	WP_011423921.1	185	COG0262	H	dihydrofolate reductase	531
RHE_RS02165	D	RHE_RS02165_m2	D	-109	-80	TTAATTAAGCAATTATCTAATTACTTTGCG	24.0	3.6e-12	-26350	11444		RHE_RS15405																							RHE_RS02765	5	563154	563654	R	24301081	-	RHE_RS02765	WP_004672867.1	166	COG1959	K	MULTISPECIES: Rrf2 family transcriptional regulator	526
RHE_RS02165	D	RHE_RS02165_m2	D	-70	-41	ATAATTAAGCAATACGTTAATTGCTTAAGC	22.5	1.5e-11	-24923	10824		RHE_RS15410																							RHE_RS02715	5	555258	555905	R	24297594	-	RHE_RS02715	WP_011423908.1	215	COG2197	TK	DNA-binding response regulator	516
RHE_RS11295	D	RHE_RS02165_m2	D	-88	-59	TCAACTAAGCATTTAATTCTATTACGTAAT	1.9	7.2e-06	-11841	5143		RHE_RS15440																							RHE_RS02340	5	473887	474468	R	24300385	-	RHE_RS02340	WP_011423839.1	193			TetR/AcrR family transcriptional regulator	445
RHE_RS17050	D	RHE_RS02165_m2	D	-162	-133	AAAACAGAGAAATGGAAAAATTATTTAATA	2.0	6.9e-06	-11884	5161		RHE_RS15480																							RHE_RS01265	5	263547	264116	D	24301652	-	RHE_RS01265	WP_011423635.1	189	COG1396	K	XRE family transcriptional regulator	239
RHE_RS24095	R	RHE_RS02165_m2	R	-41	-12	ATTTTACAGCAGTGTCCAAATTAATTGACA	1.8	7.5e-06	-11801	5125		RHE_RS15555																							RHE_RS00730	5	151335	151535	R	24300593	-	RHE_RS00730	WP_041678799.1	66			hypothetical protein	136
RHE_RS24100	D	RHE_RS02165_m2	D	-164	-135	ATTTTACAGCAGTGTCCAAATTAATTGACA	1.8	7.5e-06	-11801	5125		RHE_RS15590																							RHE_RS32555	4	110017	111051	R	30584663	-	RHE_RS32555	WP_008534360.1	344	COG2207	K	MULTISPECIES: AraC family transcriptional regulator	5761
RHE_RS00415	R	RHE_RS02165_m3	R	-217	-188	CTTGTAACCAATTAGTTATTTGCGCAAGCA	-4.8	4.4e-06	-12334	5357		RHE_RS15610																							RHE_RS31115	4	357788	358342	D	24297160	-	RHE_RS31115	WP_004672710.1	184	COG0503	F	MULTISPECIES: adenine phosphoribosyltransferase	5982
RHE_RS02165	D	RHE_RS02165_m3	D	-108	-79	TAATTAAGCAATTATCTAATTACTTTGCGC	6.9	3.0e-08	-17322	7523		RHE_RS15665																							RHE_RS30675	4	273150	273329	R	24297198	-	RHE_RS30675	WP_008536508.1	59			MULTISPECIES: cytochrome P450	5900
RHE_RS02165	D	RHE_RS02165_m3	D	-69	-40	TAATTAAGCAATACGTTAATTGCTTAAGCG	29.4	1.7e-14	-31706	13770		RHE_RS15675																							RHE_RS30500	4	239304	240152	D	24297249	-	RHE_RS30500	WP_004678528.1	282	COG2086	C	MULTISPECIES: electron transfer flavoprotein subunit beta/FixA family protein	5870
RHE_RS02165	D	RHE_RS02165_m4	D	-117	-83	CCATTCAATTAATTAAGCAATTATCTAATTACTTT	-2.9	4.3e-06	-12357	5367		RHE_RS15700																							RHE_RS30465	4	229472	230650	R	24297190	-	RHE_RS30465	WP_042120111.1	392	COG2124	QV	MULTISPECIES: cytochrome P450	5861
RHE_RS02165	D	RHE_RS02165_m4	D	-113	-79	TCAATTAATTAAGCAATTATCTAATTACTTTGCGC	29.1	2.3e-14	-31403	13638		RHE_RS15755																							RHE_RS30055	4	142846	143475	R	24297169	-	RHE_RS30055	WP_008534389.1	209	COG0588	G	MULTISPECIES: 2,3-bisphosphoglycerate-dependent phosphoglycerate mutase	5786
RHE_RS02165	D	RHE_RS02165_m4	D	-74	-40	GAAAATAATTAAGCAATACGTTAATTGCTTAAGCG	27.9	7.4e-14	-30235	13131		RHE_RS15805																							RHE_RS29795	4	78554	79303	R	24297170	-	RHE_RS29795	WP_004675991.1	249	COG0561	HR	MULTISPECIES: hypothetical protein	5737
RHE_RS12380	D	RHE_RS02165_m4	D	-104	-70	GAGAATAGTTTCACAATTGGCGAACTATTTGTTGC	-4.5	8.2e-06	-11711	5086		RHE_RS15830																							RHE_RS29335	4	622446	622661	R	24302776	-	RHE_RS29335	WP_011428858.1	71	COG3905	K	CopG family transcriptional regulator	5647
RHE_RS00340	D	RHE_RS02165_m5	D	-118	-107	TAATTAAGAAAT	9.9	2.6e-06	-12860	5585		RHE_RS15870																							RHE_RS29255	4	608278	608829	D	24302792	-	RHE_RS29255	WP_011428846.1	183			hypothetical protein	5631
RHE_RS02165	D	RHE_RS02165_m5	D	-108	-97	TAATTAAGCAAT	15.3	5.8e-08	-16663	7237		RHE_RS15880																							RHE_RS28880	4	532575	533045	R	24302867	-	RHE_RS28880	WP_042120017.1	156	COG0071	O	molecular chaperone Hsp20	5560
RHE_RS02165	D	RHE_RS02165_m5	D	-69	-58	TAATTAAGCAAT	15.3	5.8e-08	-16663	7237		RHE_RS15890																							RHE_RS28605	4	472858	473886	D	24302922	-	RHE_RS28605	WP_011428723.1	342	COG0667	R	aldo/keto reductase	5507
RHE_RS21555	D	RHE_RS02165_m5	D	-72	-61	CAATTAAACAAT	9.7	3.4e-06	-12592	5469		RHE_RS15925																							RHE_RS27465	4	210003	210605	D	24303150	-	RHE_RS27465	WP_011428507.1	200			amino acid synthesis family protein	5282
RHE_RS25905	R	RHE_RS02165_m5	R	-129	-118	TAAATAAGCAAT	9.8	3.1e-06	-12684	5509		RHE_RS15970																							RHE_RS27460	4	207840	209642	R	24303151	-	RHE_RS27460	WP_011428506.1	600	COG2203	T	PucR family transcriptional regulator	5281
RHE_RS02310	R	RHE_RS02310_m1	R	-52	-29	TCTAGAATGACTGATAAAGAATGC	27.4	7.7e-14	-30195	13114		RHE_RS15995																							RHE_RS27195	4	154549	155310	D	24303204	-	RHE_RS27195	WP_011428454.1	253	COG0664	T	Crp/Fnr family transcriptional regulator	5229
RHE_RS03645	R	RHE_RS02310_m1	R	-166	-143	AATGGAATGCTCTATATAGACGTC	3.2	1.8e-06	-13228	5745		RHE_RS16030																							RHE_RS27050	4	125727	126500	D	24303233	-	RHE_RS27050	WP_011428428.1	257	COG0664	T	Crp/Fnr family transcriptional regulator	5197
RHE_RS16415	R	RHE_RS02310_m1	R	-65	-42	AATGGAGAGTTTAAGCAAGAATGC	-0.6	8.6e-06	-11664	5066		RHE_RS16035																							RHE_RS26750	4	64261	65634	R	24303293	-	RHE_RS26750	WP_011428376.1	457			PAS domain S-box protein	5140
RHE_RS29840	D	RHE_RS02310_m1	D	-110	-87	TCTAGAATAGTTGCTAATGACCGC	2.3	2.7e-06	-12822	5569		RHE_RS16040																							RHE_RS26605	4	38487	39428	R	24303322	-	RHE_RS26605	WP_011428349.1	313	COG1879	G	D-ribose ABC transporter substrate-binding protein	5111
RHE_RS02310	R	RHE_RS02310_m2	R	-34	-11	CGATTCTTTATCAGTTGTTCTAGA	26.2	3.6e-13	-28653	12444		RHE_RS16100																							RHE_RS26150	4	449436	451805	D	24302333	-	RHE_RS26150	WP_011428259.1	789	COG0404	E	DUF1989 domain-containing protein	5021
RHE_RS15890	D	RHE_RS02310_m2	D	-101	-78	CGATTATTTATCGCACATTTTAAA	6.9	4.8e-07	-14549	6319		RHE_RS16110																							RHE_RS25605	4	339943	340566	D	24302442	-	RHE_RS25605	WP_011428157.1	207	COG1309	K	TetR/AcrR family transcriptional regulator	4912
RHE_RS15890	D	RHE_RS02310_m2	D	-43	-20	CGATTATTTATCGCGCGATATAAA	1.8	5.2e-06	-12167	5284		RHE_RS16120																							RHE_RS25595	4	339020	339547	D	24302444	-	RHE_RS25595	WP_011428155.1	175	COG5631	K	transcriptional regulator	4910
RHE_RS15925	D	RHE_RS02310_m2	D	-131	-108	CTATTTCTGATCGATCGATCAATT	0.5	8.9e-06	-11629	5051		RHE_RS16135																							RHE_RS25455	4	308167	309120	R	24302472	-	RHE_RS25455	WP_011428127.1	317	COG0583	K	LysR family transcriptional regulator	4882
RHE_RS02310	R	RHE_RS02310_m3	R	-224	-208	ACTGACGGAGGCAGAGG	11.9	8.4e-07	-13990	6076		RHE_RS16205																							RHE_RS25205	4	261021	261728	D	24302522	-	RHE_RS25205	WP_042119883.1	235	COG0765	E	amino acid ABC transporter permease	4836
RHE_RS02310	R	RHE_RS02310_m3	R	-50	-34	AATGACTGATAAAGAAT	14.3	1.3e-08	-18158	7886		RHE_RS16210																							RHE_RS24100	4	20305	21504	D	24302743	-	RHE_RS24100	WP_011427874.1	399	COG0477	GEPR	Bcr/CflA family drug resistance efflux transporter	4619
RHE_RS09505	D	RHE_RS02310_m3	D	-37	-21	AGTGATCTAGTCAGAGG	10.4	4.8e-06	-12247	5319		RHE_RS16230																							RHE_RS24095	4	19393	20133	R	24302744	-	RHE_RS24095	WP_041679049.1	246	COG1309	K	TetR/AcrR family transcriptional regulator	4618
RHE_RS01495	R	RHE_RS02310_m4	R	-86	-69	CTAGATGGACTGATAGTA	7.8	8.2e-06	-11711	5086		RHE_RS16260																							RHE_RS23520	4	142893	143678	R	24302145	-	RHE_RS23520	WP_011427760.1	261			XRE family transcriptional regulator	4504
RHE_RS02310	R	RHE_RS02310_m4	R	-47	-30	CTAGAATGACTGATAAAG	20.5	2.1e-11	-24586	10678		RHE_RS16330																							RHE_RS23195	4	69142	70269	D	24302210	-	RHE_RS23195	WP_011427696.1	375	COG1960	I	acyl-CoA dehydrogenase	4440
RHE_RS16205	D	RHE_RS02310_m4	D	-89	-72	ATAGAATAAGTGGTAATG	10.7	1.2e-06	-13633	5921		RHE_RS16340																							RHE_RS23055	4	38022	39080	D	24302238	-	RHE_RS23055	WP_011427668.1	352	COG1609	K	LacI family transcriptional regulator	4414
RHE_RS24615	R	RHE_RS02310_m4	R	-271	-254	CTAGATACATCAATAATA	8.5	5.0e-06	-12206	5301		RHE_RS16415																							RHE_RS23050	4	35558	37879	R	24302239	-	RHE_RS23050	WP_011427667.1	773	COG3408	G	alpha-L-rhamnosidase	4413
RHE_RS24620	D	RHE_RS02310_m4	D	-90	-73	CTAGATACATCAATAATA	8.5	5.0e-06	-12206	5301		RHE_RS16420																							RHE_RS22955	4	18010	18705	D	24302258	-	RHE_RS22955	WP_011427648.1	231	COG1802	K	MULTISPECIES: GntR family transcriptional regulator	4393
RHE_RS29840	D	RHE_RS02310_m4	D	-109	-92	CTAGAATAGTTGCTAATG	9.9	2.0e-06	-13122	5699		RHE_RS16425																							RHE_RS22710	4	154557	155903	R	24301900	-	RHE_RS22710	WP_011427603.1	448	COG2182	G	ABC transporter substrate-binding protein	4347
RHE_RS02310	R	RHE_RS02310_m5	R	-47	-30	CTAGAATGACTGATAAAG	23.5	1.3e-11	-25066	10886		RHE_RS16435																							RHE_RS22460	4	101810	102604	R	24301950	-	RHE_RS22460	WP_011427553.1	264	COG2197	TK	LuxR family transcriptional regulator	4298
RHE_RS12200	R	RHE_RS02310_m5	R	-42	-25	CAACACTGAACAATAAAG	1.4	7.9e-06	-11749	5102		RHE_RS16475																							RHE_RS20595	4	4266876	4267403	D	24297880	-	RHE_RS20595	WP_020922561.1	175	COG1846	K	MarR family transcriptional regulator	3972
RHE_RS12205	D	RHE_RS02310_m5	D	-27	-10	CAACACTGAACAATAAAG	1.4	7.9e-06	-11749	5102		RHE_RS16510																							RHE_RS20080	4	4156647	4157288	D	24299613	-	RHE_RS20080	WP_020922493.1	213	COG1280	E	LysE family translocator	3866
RHE_RS16205	D	RHE_RS02310_m5	D	-89	-72	ATAGAATAAGTGGTAATG	2.1	5.7e-06	-12075	5244		RHE_RS16545																							RHE_RS19545	4	4047126	4047407	D	24300643	-	RHE_RS19545	WP_041678914.1	93	COG0271	T	MULTISPECIES: BolA family transcriptional regulator	3762
RHE_RS27715	D	RHE_RS02310_m5	D	-84	-67	CTGGAACGATCAAAAGAG	3.4	3.6e-06	-12535	5444		RHE_RS16555																							RHE_RS19335	4	4010030	4010626	D	24299688	-	RHE_RS19335	WP_011426982.1	198	COG1238	S	DedA family protein	3720
RHE_RS29840	D	RHE_RS02310_m5	D	-109	-92	CTAGAATAGTTGCTAATG	7.2	5.2e-07	-14469	6284		RHE_RS16590																							RHE_RS18690	4	3870380	3871129	D	24297943	-	RHE_RS18690	WP_020922317.1	249	COG0861	P	TerC family protein	3599
RHE_RS02315	R	RHE_RS02315_m1	R	-69	-52	CGCTTCAGGACTTGCGTC	19.5	4.9e-10	-21437	9310		RHE_RS16610																							RHE_RS18365	4	3792342	3793577	D	24298389	-	RHE_RS18365	WP_011426807.1	411	COG2304	R	VWA domain-containing protein	3535
RHE_RS02680	R	RHE_RS02315_m1	R	-137	-120	CGCTTCAGCCCTTCCATT	4.6	9.1e-06	-11607	5041		RHE_RS16650																							RHE_RS17450	4	3590784	3591827	D	24299449	-	RHE_RS17450	WP_011426640.1	347	COG1609	K	LacI family transcriptional regulator	3353
RHE_RS15155	R	RHE_RS02315_m2	R	-211	-194	GCCCGAAGGCCTGAAGCG	6.3	2.1e-06	-13074	5678		RHE_RS16670																							RHE_RS17430	4	3583906	3584508	D	24298917	-	RHE_RS17430	WP_011426636.1	200	COG1309	K	TetR/AcrR family transcriptional regulator	3349
RHE_RS12840	R	RHE_RS02315_m3	R	-167	-156	TGCCGAAAAACT	13.5	2.3e-07	-15285	6638		RHE_RS16740																							RHE_RS16895	4	3467519	3468382	R	24298278	-	RHE_RS16895	WP_020922092.1	287	COG3706	TK	GGDEF domain-containing protein	3251
RHE_RS14160	R	RHE_RS02315_m3	R	-40	-29	AGCCGAAAAACT	8.4	7.7e-06	-11774	5114		RHE_RS16760																							RHE_RS16650	4	3422876	3423271	D	24300393	-	RHE_RS16650	WP_011426488.1	131			DUF1236 domain-containing protein	3203
RHE_RS22155	R	RHE_RS02315_m3	R	-83	-72	TTGCGAAAAACT	8.2	9.2e-06	-11596	5036		RHE_RS16765																							RHE_RS16545	4	3399511	3400224	R	24299074	-	RHE_RS16545	WP_011426468.1	237			hypothetical protein	3182
RHE_RS23130	D	RHE_RS02315_m3	D	-122	-111	TGCCGAAAAGTG	11.4	3.0e-06	-12717	5523		RHE_RS16785																							RHE_RS16475	4	3382289	3383254	D	24297553	-	RHE_RS16475	WP_011426454.1	321	COG1215	N	glycosyltransferase family 2 protein	3168
RHE_RS02315	R	RHE_RS02315_m4	R	-20	-9	CCATGATACGCC	13.1	2.2e-07	-15330	6658		RHE_RS16800																							RHE_RS15555	4	3181805	3182035	D	24301485	-	RHE_RS15555	WP_011426281.1	76			CopG family transcriptional regulator	2994
RHE_RS13750	R	RHE_RS02315_m5	R	-48	-37	GGCGTATCATGC	11.5	8.5e-07	-13978	6071		RHE_RS16815																							RHE_RS15240	4	3120955	3121755	D	24300390	-	RHE_RS15240	WP_011426222.1	266	COG3570	V	3\'-kinase	2934
RHE_RS02330	R	RHE_RS02340_m1	R	-333	-303	ATGATCTATGATGATAAACGTCATTAAAATA	16.2	9.1e-09	-18515	8041		RHE_RS16825																							RHE_RS15040	4	3070065	3070784	R	24301244	-	RHE_RS15040	WP_011426183.1	239	COG0664	T	Crp/Fnr family transcriptional regulator	2895
RHE_RS02330	R	RHE_RS02340_m1	R	-307	-277	GACAACTTTGATGACGGGCATCATTAATGAT	21.9	2.0e-11	-24635	10699		RHE_RS16880																							RHE_RS14355	4	2922699	2923601	D	24301520	-	RHE_RS14355	WP_011426052.1	300	COG0583	K	LysR family transcriptional regulator	2761
RHE_RS02340	R	RHE_RS02340_m1	R	-87	-57	TTACTTATTGATGATGTGCATCATTAATATG	23.4	1.7e-12	-27100	11770		RHE_RS16895																							RHE_RS14280	4	2905791	2906705	R	24301296	-	RHE_RS14280	WP_011426038.1	304	COG0329	EM	dihydrodipicolinate synthase family protein	2747
RHE_RS02340	R	RHE_RS02340_m1	R	-57	-27	TCCAACTATGATGGCGGCCGTCATTATAGCT	22.9	4.2e-12	-26196	11377		RHE_RS16970																							RHE_RS13970	4	2841194	2842252	D	24301578	-	RHE_RS13970	WP_011425976.1	352	COG0667	R	aldo/keto reductase	2687
RHE_RS11295	D	RHE_RS02340_m1	D	-165	-135	TACAATTTTAATCGAGGTCGACATAAATACG	7.7	2.5e-06	-12899	5602		RHE_RS17040																							RHE_RS13750	4	2798801	2799247	R	24297755	-	RHE_RS13750	WP_041678693.1	148	COG3832	S	transcriptional regulator	2645
RHE_RS19300	R	RHE_RS02340_m1	R	-57	-27	GACAAAATATATGATGTCCATCATCAATAAG	9.2	1.1e-06	-13720	5959		RHE_RS17050																							RHE_RS13505	4	2750497	2751189	R	24299239	-	RHE_RS13505	WP_011425888.1	230	COG0693	R	type 1 glutamine amidotransferase domain-containing protein	2600
RHE_RS29975	D	RHE_RS02340_m1	D	-54	-24	CAGTATATTGATTCTGTGCGTCACTAGAAAT	5.3	8.6e-06	-11664	5066		RHE_RS17090																							RHE_RS13265	4	2701909	2702382	R	24300331	-	RHE_RS13265	WP_011425841.1	157	COG3865	R	VOC family protein	2556
RHE_RS02330	R	RHE_RS02340_m2	R	-311	-296	ATCATTAATGATCTAT	9.5	8.1e-06	-11724	5092		RHE_RS17105																							RHE_RS13220	4	2693713	2694366	D	24298426	-	RHE_RS13220	WP_011425834.1	217	COG4122	R	O-methyltransferase	2548
RHE_RS02340	R	RHE_RS02340_m2	R	-75	-60	CTTATTGATGATGTGC	16.0	4.3e-09	-19265	8367		RHE_RS17135																							RHE_RS13215	4	2692971	2693621	R	24298427	-	RHE_RS13215	WP_011425833.1	216	COG1309	K	TetR/AcrR family transcriptional regulator	2547
RHE_RS03180	D	RHE_RS02340_m2	D	-148	-133	ATAATTGATGATATCC	10.3	4.3e-06	-12357	5367		RHE_RS17145																							RHE_RS12840	4	2624384	2624734	R	24301308	-	RHE_RS12840	WP_011425764.1	116			hypothetical protein	2478
RHE_RS17170	R	RHE_RS02340_m2	R	-44	-29	CATACTTATGATATGC	9.8	6.0e-06	-12024	5222		RHE_RS17170																							RHE_RS12800	4	2616730	2617449	D	24298723	-	RHE_RS12800	WP_020921550.1	239	COG1285	S	MgtC/SapB family protein	2471
RHE_RS17175	D	RHE_RS02340_m2	D	-206	-191	CATACTTATGATATGC	9.8	6.0e-06	-12024	5222		RHE_RS17175																							RHE_RS12380	4	2537048	2537734	D	24298251	-	RHE_RS12380	WP_011425681.1	228	COG0625	O	glutathione S-transferase family protein	2391
RHE_RS19300	R	RHE_RS02340_m2	R	-45	-30	AAAATATATGATGTCC	9.2	9.4e-06	-11575	5027		RHE_RS17180																							RHE_RS12205	4	2500863	2501330	D	24297934	-	RHE_RS12205	WP_011425648.1	155	COG1846	K	MarR family transcriptional regulator	2360
RHE_RS02330	R	RHE_RS02340_m3	R	-333	-303	ATGATCTATGATGATAAACGTCATTAAAATA	17.0	3.5e-09	-19471	8456		RHE_RS17200																							RHE_RS12200	4	2499841	2500815	R	24297935	-	RHE_RS12200	WP_042118571.1	324	COG1073	T	alpha/beta hydrolase	2359
RHE_RS02330	R	RHE_RS02340_m3	R	-307	-277	GACAACTTTGATGACGGGCATCATTAATGAT	22.0	2.9e-11	-24264	10538		RHE_RS17205																							RHE_RS10640	4	2171429	2172043	D	24298640	-	RHE_RS10640	WP_011425345.1	204	COG1802	K	GntR family transcriptional regulator	2054
RHE_RS02340	R	RHE_RS02340_m3	R	-87	-57	TTACTTATTGATGATGTGCATCATTAATATG	26.3	2.1e-14	-31494	13678		RHE_RS17210																							RHE_RS09445	4	1938515	1939174	D	24297790	-	RHE_RS09445	WP_042118314.1	219	COG1309	K	TetR/AcrR family transcriptional regulator	1822
RHE_RS02340	R	RHE_RS02340_m3	R	-57	-27	TCCAACTATGATGGCGGCCGTCATTATAGCT	22.9	9.4e-12	-25390	11027		RHE_RS17240																							RHE_RS09090	4	1863880	1864206	R	24301326	-	RHE_RS09090	WP_011425070.1	108			hypothetical protein	1751
RHE_RS14485	R	RHE_RS02340_m3	R	-37	-7	GCTCCCCTGGATGATCCACATCCTAGATAAG	3.8	7.6e-06	-11787	5119		RHE_RS17260																							RHE_RS09015	4	1849974	1850549	D	24300362	-	RHE_RS09015	WP_011425055.1	191	COG1309	K	TetR/AcrR family transcriptional regulator	1737
RHE_RS19300	R	RHE_RS02340_m3	R	-86	-56	AGCAACAAATATGATGACCATCATGTAAAGC	6.5	2.1e-06	-13074	5678		RHE_RS17320																							RHE_RS08925	4	1826968	1827468	R	24299358	-	RHE_RS08925	WP_011425037.1	166	COG1522	K	Lrp/AsnC family transcriptional regulator	1719
RHE_RS19300	R	RHE_RS02340_m3	R	-57	-27	GACAAAATATATGATGTCCATCATCAATAAG	11.0	1.9e-07	-15476	6721		RHE_RS17400																							RHE_RS08920	4	1826503	1826964	D	24299005	-	RHE_RS08920	WP_011425036.1	153	COG1522	K	Lrp/AsnC family transcriptional regulator	1718
RHE_RS02330	R	RHE_RS02340_m4	R	-336	-306	ATCTATGATGATAAACGTCATTAAAATACAC	2.2	5.3e-06	-12148	5276		RHE_RS17430																							RHE_RS08760	4	1793825	1794712	D	24298672	-	RHE_RS08760	WP_011425005.1	295	COG0583	K	LysR family transcriptional regulator	1688
RHE_RS02330	R	RHE_RS02340_m4	R	-333	-303	ATGATCTATGATGATAAACGTCATTAAAATA	5.8	1.0e-06	-13816	6000		RHE_RS17450																							RHE_RS08755	4	1792860	1793711	R	24298673	-	RHE_RS08755	WP_011425004.1	283	COG4221	C	KR domain-containing protein	1687
RHE_RS02330	R	RHE_RS02340_m4	R	-307	-277	GACAACTTTGATGACGGGCATCATTAATGAT	12.6	2.9e-08	-17356	7538		RHE_RS17515																							RHE_RS07685	4	1583044	1583559	D	24299318	-	RHE_RS07685	WP_004673822.1	171	COG1846	K	MULTISPECIES: MarR family transcriptional regulator	1487
RHE_RS02340	R	RHE_RS02340_m4	R	-60	-30	AACTATGATGGCGGCCGTCATTATAGCTTAC	5.2	1.4e-06	-13479	5854		RHE_RS17595																							RHE_RS07165	4	1476421	1477266	R	24297622	-	RHE_RS07165	WP_011424739.1	281	COG0354	O	folate-binding protein	1382
RHE_RS02340	R	RHE_RS02340_m4	R	-57	-27	TCCAACTATGATGGCGGCCGTCATTATAGCT	28.9	3.6e-15	-33258	14444		RHE_RS17645																							RHE_RS06825	4	1392332	1393198	R	24297694	-	RHE_RS06825	WP_011424674.1	288	COG0583	K	LysR family transcriptional regulator	1314
RHE_RS14905	D	RHE_RS02340_m4	D	-56	-26	CCTTGTATTTATGACGGTCCTCACGGTAGGA	2.0	5.7e-06	-12075	5244		RHE_RS17805																							RHE_RS06705	4	1367619	1368092	D	24298374	-	RHE_RS06705	WP_042119214.1	157	COG1522	K	MULTISPECIES: Lrp/AsnC family transcriptional regulator	1289
RHE_RS30465	R	RHE_RS02340_m4	R	-229	-199	CGCTGCTTTGTTGGCCGAAGTCGAAATTTCT	2.3	5.3e-06	-12148	5276		RHE_RS17815																							RHE_RS05560	4	1138071	1138604	D	24297904	-	RHE_RS05560	WP_011424431.1	177			DUF937 domain-containing protein	1067
RHE_RS02330	R	RHE_RS02340_m5	R	-330	-306	ATCTATGATGATAAACGTCATTAAA	21.1	4.6e-11	-23802	10337		RHE_RS17830																							RHE_RS03990	4	829886	831307	R	24300299	-	RHE_RS03990	WP_011424142.1	473	COG2814	G	MFS transporter	760
RHE_RS02330	R	RHE_RS02340_m5	R	-304	-280	AACTTTGATGACGGGCATCATTAAT	21.3	3.3e-11	-24135	10481		RHE_RS17835																							RHE_RS02855	4	585662	586219	D	24301089	-	RHE_RS02855	WP_020920333.1	185	COG1309	K	TetR family transcriptional regulator	544
RHE_RS02340	R	RHE_RS02340_m5	R	-84	-60	CTTATTGATGATGTGCATCATTAAT	19.1	6.2e-10	-21201	9208		RHE_RS17840																							RHE_RS02595	4	531693	532406	D	24299385	phoU	RHE_RS02595	WP_004672769.1	237	COG0704	P	MULTISPECIES: phosphate transport system regulatory protein PhoU	495
RHE_RS02340	R	RHE_RS02340_m5	R	-54	-30	AACTATGATGGCGGCCGTCATTATA	21.6	2.0e-11	-24635	10699		RHE_RS17845																							RHE_RS02290	4	464155	465405	D	24299038	-	RHE_RS02290	WP_011423829.1	416	COG0665	E	FAD-dependent oxidoreductase	436
RHE_RS13110	D	RHE_RS02340_m5	D	-56	-32	ACCATCGATGTCCGACACCATCCTA	7.0	5.1e-06	-12186	5292		RHE_RS17940																							RHE_RS02130	4	435021	435635	R	24301257	-	RHE_RS02130	WP_011423801.1	204			calcium-binding protein	407
RHE_RS16670	R	RHE_RS02340_m5	R	-115	-91	CACTTTGATGACGGTTGCGATCATT	11.8	2.9e-07	-15053	6538		RHE_RS17955																							RHE_RS01740	4	354643	355554	D	24298621	-	RHE_RS01740	WP_011423728.1	303	COG0583	K	LysR family transcriptional regulator	329
RHE_RS19300	R	RHE_RS02340_m5	R	-83	-59	AACAAATATGATGACCATCATGTAA	8.5	2.3e-06	-12983	5638		RHE_RS18035																							RHE_RS01660	4	333968	334432	D	24300225	-	RHE_RS01660	WP_011423712.1	154	COG1522	K	Lrp/AsnC family transcriptional regulator	314
RHE_RS19300	R	RHE_RS02340_m5	R	-54	-30	AAAATATATGATGTCCATCATCAAT	10.0	9.2e-07	-13899	6036		RHE_RS18085																							RHE_RS01655	4	332953	333855	R	24299519	-	RHE_RS01655	WP_011423711.1	300	COG0697	GER	EamA/RhaT family transporter	313
RHE_RS25805	D	RHE_RS02340_m5	D	-42	-18	AGCATTGATGATCCGCTACATCCTC	6.1	8.1e-06	-11724	5092		RHE_RS18135																							RHE_RS01645	4	331108	332070	R	24299652	cysK	RHE_RS01645	WP_011423709.1	320	COG0031	E	cysteine synthase A	311
RHE_RS02355	R	RHE_RS02355_m1	R	-326	-313	CTCTGGGAGGAGTT	14.3	4.1e-09	-19312	8387		RHE_RS18140																							RHE_RS01410	4	289580	290077	R	24300618	-	RHE_RS01410	WP_011423663.1	165	COG1846	K	MarR family transcriptional regulator	268
RHE_RS03180	D	RHE_RS02355_m1	D	-27	-14	GCATGGGAGGAGAG	10.4	6.2e-06	-11991	5208		RHE_RS18175																							RHE_RS01390	4	284949	286796	D	24297556	-	RHE_RS01390	WP_011423660.1	615	COG1287	O	hypothetical protein	264
RHE_RS05555	D	RHE_RS02355_m1	D	-17	-4	CCATGGGAGGAATC	10.6	5.1e-06	-12186	5292		RHE_RS18235																							RHE_RS00285	4	56550	57128	R	24299273	-	RHE_RS00285	WP_011423459.1	192	COG4567	TK	MULTISPECIES: DNA-binding response regulator	55
RHE_RS10680	D	RHE_RS02355_m1	D	-17	-4	CATTGGGAGGATAT	11.7	1.2e-06	-13633	5921		RHE_RS18240																							RHE_RS33365	3	109481	109801	D	32803366	-	RHE_RS33365	WP_011053347.1	106			MULTISPECIES: hypothetical protein	5759
RHE_RS13525	D	RHE_RS02355_m1	D	-17	-4	CTTTGGGAGGAAAA	10.5	5.6e-06	-12093	5252		RHE_RS18340																							RHE_RS32880	3	1124949	1125614	D	31930175	-	RHE_RS32880	WP_011424412.1	221			hypothetical protein	1048
RHE_RS14700	D	RHE_RS02355_m1	D	-18	-5	GGCTGGGAGGATCC	10.2	8.4e-06	-11687	5076		RHE_RS18365																							RHE_RS32785	3	327627	327836	R	30584709	-	RHE_RS32785	WP_073990450.1	69			MULTISPECIES: hypothetical protein	5959
RHE_RS17205	R	RHE_RS02355_m1	R	-139	-126	CACCGGGAGGAGTT	13.4	5.7e-08	-16680	7244		RHE_RS18370																							RHE_RS31120	3	358374	359642	D	24297326	-	RHE_RS31120	WP_011053496.1	422	COG0535	R	radical SAM/SPASM domain-containing protein	5983
RHE_RS17210	D	RHE_RS02355_m1	D	-19	-6	CACCGGGAGGAGTT	13.4	5.7e-08	-16680	7244		RHE_RS18455																							RHE_RS30505	3	240168	241277	D	24297369	-	RHE_RS30505	WP_004678527.1	369	COG2025	C	MULTISPECIES: electron transfer flavoprotein subunit alpha/FixB family protein	5871
RHE_RS19030	D	RHE_RS02355_m1	D	-17	-4	CCGTGGGAGGAGCA	10.3	6.8e-06	-11899	5167		RHE_RS18525																							RHE_RS28370	3	420757	421419	D	24302969	-	RHE_RS28370	WP_086005059.1	220	COG1309	K	TetR/AcrR family transcriptional regulator	5460
RHE_RS20810	D	RHE_RS02355_m1	D	-327	-314	CTATGGGAGGAGGA	11.0	3.1e-06	-12684	5509		RHE_RS18560																							RHE_RS27975	3	334064	335326	D	24303048	-	RHE_RS27975	WP_011428605.1	420	COG4949	S	DUF3422 domain-containing protein	5383
RHE_RS22155	R	RHE_RS02355_m1	R	-305	-292	ACCTGGGAGGAATG	10.0	9.2e-06	-11596	5036		RHE_RS18650																							RHE_RS27920	3	319840	320472	D	24303059	-	RHE_RS27920	WP_011428594.1	210	COG1309	K	TetR/AcrR family transcriptional regulator	5372
RHE_RS23915	R	RHE_RS02355_m1	R	-284	-271	GCTTGGGAGGAGCG	10.6	5.1e-06	-12186	5292		RHE_RS18665																							RHE_RS27605	3	240682	241347	D	24303122	-	RHE_RS27605	WP_011428534.1	221	COG0778	C	NADH dehydrogenase	5308
RHE_RS23920	D	RHE_RS02355_m1	D	-17	-4	GCTTGGGAGGAGCG	10.6	5.1e-06	-12186	5292		RHE_RS18680																							RHE_RS27580	3	234602	238237	D	24303127	-	RHE_RS27580	WP_011428529.1	1211	COG2202	T	PAS domain S-box protein	5303
RHE_RS25465	D	RHE_RS02355_m1	D	-19	-6	CTCTGGGAGGAGAG	12.6	2.5e-07	-15202	6602		RHE_RS18685																							RHE_RS27570	3	233212	233445	R	24303129	-	RHE_RS27570	WP_011428527.1	77	COG2002	KV	AbrB family transcriptional regulator	5302
RHE_RS05855	R	RHE_RS02355_m2	R	-69	-53	CTCGACATTCAATAAAT	5.3	6.9e-06	-11884	5161		RHE_RS18690																							RHE_RS27170	3	149928	150677	R	24303209	-	RHE_RS27170	WP_011428450.1	249	COG1028	IQR	short-chain dehydrogenase	5224
RHE_RS06135	D	RHE_RS02355_m2	D	-36	-20	TTCGTCAAGAATTTAAT	4.8	8.7e-06	-11652	5060		RHE_RS18710																							RHE_RS27165	3	147518	149140	D	24303210	-	RHE_RS27165	WP_011428449.1	540	COG5001	T	GGDEF-domain containing protein	5223
RHE_RS02355	R	RHE_RS02355_m3	R	-18	-7	GCTCCTCCCGAG	11.2	2.6e-06	-12860	5585		RHE_RS18760																							RHE_RS26795	3	73511	73915	D	24303284	-	RHE_RS26795	WP_011428383.1	134	COG0784	T	response regulator	5148
RHE_RS09005	D	RHE_RS02355_m3	D	-231	-220	AATCCTCCCGTT	10.8	5.6e-06	-12093	5252		RHE_RS18765																							RHE_RS26790	3	72240	73412	D	24303285	-	RHE_RS26790	WP_011428382.1	390	COG0664	T	transcriptional regulator	5147
RHE_RS15805	D	RHE_RS02355_m3	D	-229	-218	AATCCTCCCGGA	10.5	8.5e-06	-11675	5071		RHE_RS18795																							RHE_RS26680	3	54673	55200	D	24303307	-	RHE_RS26680	WP_011428363.1	175	COG1595	K	RNA polymerase sigma factor	5126
RHE_RS15970	D	RHE_RS02355_m3	D	-157	-146	AATCCTCCCGAA	10.6	7.5e-06	-11801	5125		RHE_RS18835																							RHE_RS26115	3	440314	441060	R	24302340	-	RHE_RS26115	WP_011428251.1	248	COG2186	K	FadR family transcriptional regulator	5012
RHE_RS16330	D	RHE_RS02355_m3	D	-165	-154	GCTCCTCCCGGA	10.8	5.6e-06	-12093	5252		RHE_RS18840																							RHE_RS25775	3	370143	370622	R	24302408	-	RHE_RS25775	WP_011428188.1	159	COG0456	J	N-acetyltransferase	4946
RHE_RS22790	R	RHE_RS02355_m3	R	-22	-11	TATCCTCCCGGG	10.9	4.6e-06	-12289	5337		RHE_RS18865																							RHE_RS24980	3	214520	215446	D	24302567	-	RHE_RS24980	WP_011428041.1	308	COG2207	K	AraC family transcriptional regulator	4794
RHE_RS22795	D	RHE_RS02355_m3	D	-353	-342	TATCCTCCCGGG	10.9	4.6e-06	-12289	5337		RHE_RS18900																							RHE_RS24975	3	212846	214276	R	24302568	-	RHE_RS24975	WP_011428040.1	476	COG1653	G	sugar ABC transporter ATP-binding protein	4793
RHE_RS25335	R	RHE_RS02355_m3	R	-117	-106	GCTCCTCCCGGG	11.4	1.7e-06	-13285	5770		RHE_RS18970																							RHE_RS24860	3	191926	192405	D	24302591	-	RHE_RS24860	WP_011428017.1	159	COG3865	R	VOC family protein	4770
RHE_RS26605	R	RHE_RS02355_m3	R	-16	-5	TTTCCTCCCGGT	10.4	8.9e-06	-11629	5051		RHE_RS19020																							RHE_RS24545	3	118131	119297	D	24302654	-	RHE_RS24545	WP_011427960.1	388	COG4948	MR	mandelate racemase/muconate lactonizing enzyme family protein	4709
RHE_RS27525	D	RHE_RS02355_m3	D	-271	-260	TCTCCTCCCAGA	11.6	1.1e-06	-13720	5959		RHE_RS19030																							RHE_RS24425	3	91314	92039	D	24302678	-	RHE_RS24425	WP_011427936.1	241	COG4215	E	ABC transporter permease	4685
RHE_RS03430	D	RHE_RS02355_m4	D	-108	-92	TTAATCAATTATTAATT	5.8	4.2e-06	-12380	5377		RHE_RS19045																							RHE_RS24300	3	69336	70382	R	24302703	-	RHE_RS24300	WP_042119916.1	348	COG0015	F	3-carboxy-cis,cis-muconate cycloisomerase	4658
RHE_RS06135	D	RHE_RS02355_m4	D	-36	-20	TTCGTCAAGAATTTAAT	4.8	6.8e-06	-11899	5167		RHE_RS19065																							RHE_RS24010	3	245129	246214	D	24302047	-	RHE_RS24010	WP_011427854.1	361	COG1940	KG	glucokinase	4602
RHE_RS28160	R	RHE_RS02355_m4	R	-55	-39	GTTCTCTATATAAAAAT	4.1	9.8e-06	-11533	5009		RHE_RS19100																							RHE_RS23470	3	130057	131046	R	24302155	-	RHE_RS23470	WP_011427750.1	329	COG4977	K	GlxA family transcriptional regulator	4494
RHE_RS28165	D	RHE_RS02355_m4	D	-280	-264	GTTCTCTATATAAAAAT	4.1	9.8e-06	-11533	5009		RHE_RS19295																							RHE_RS23310	3	94471	95112	R	24302187	-	RHE_RS23310	WP_011427719.1	213	COG4638	PR	oxidoreductase	4465
RHE_RS13275	D	RHE_RS02355_m5	D	-77	-68	GCAGAATGCC	10.7	4.5e-06	-12311	5347		RHE_RS19300																							RHE_RS23240	3	80221	81543	D	24302201	-	RHE_RS23240	WP_011427705.1	440	COG1653	G	sn-glycerol-3-phosphate ABC transporter substrate-binding protein UgpB	4451
RHE_RS26115	R	RHE_RS02355_m5	R	-48	-39	GCAGAATGCT	10.4	7.5e-06	-11801	5125		RHE_RS19335																							RHE_RS23080	3	44447	44824	R	24302233	-	RHE_RS23080	WP_042119708.1	125	COG1733	K	transcriptional regulator	4419
RHE_RS02395	R	RHE_RS02400_m1	R	-65	-44	TGCGAAATGAGATAAACTCTCT	14.5	1.9e-08	-17779	7721		RHE_RS19360																							RHE_RS22620	3	134979	136187	R	24301918	-	RHE_RS22620	WP_011427585.1	402	COG1960	I	acyl-CoA dehydrogenase	4329
RHE_RS02395	R	RHE_RS02400_m1	R	-39	-18	GGGAAAATAAGAGAAACTCTCT	22.1	3.2e-11	-24165	10495		RHE_RS19425																							RHE_RS21830	3	162952	163875	D	24301726	-	RHE_RS21830	WP_011427433.1	307	COG4227	L	DUF1738 domain-containing protein	4178
RHE_RS02400	D	RHE_RS02400_m1	D	-81	-60	GGGAAAATAAGAGAAACTCTCT	22.1	3.2e-11	-24165	10495		RHE_RS19545																							RHE_RS21825	3	162066	162653	D	24301727	-	RHE_RS21825	WP_011427432.1	195			hypothetical protein	4177
RHE_RS02400	D	RHE_RS02400_m1	D	-55	-34	TGCGAAATGAGATAAACTCTCT	14.5	1.9e-08	-17779	7721		RHE_RS19670																							RHE_RS21685	3	134098	134373	R	24301755	-	RHE_RS21685	WP_042119544.1	91			hypothetical protein	4157
RHE_RS13215	R	RHE_RS02400_m1	R	-45	-24	TAGAAAATGCGAGGGATTATTC	5.0	3.1e-06	-12684	5509		RHE_RS19690																							RHE_RS21540	3	102550	103386	D	24301784	-	RHE_RS21540	WP_011427384.1	278	COG3293	X	IS5 family transposase ISRel20	4135
RHE_RS13220	D	RHE_RS02400_m1	D	-72	-51	TAGAAAATGCGAGGGATTATTC	5.0	3.1e-06	-12684	5509		RHE_RS19695																							RHE_RS21445	3	77704	78849	R	24301803	-	RHE_RS21445	WP_042119525.1	381	COG3385	X	IS4-like element ISRel1 family transposase	4123
RHE_RS20665	D	RHE_RS02400_m1	D	-132	-111	TCCTAACTATGAGGAACAATCA	3.0	7.4e-06	-11814	5131		RHE_RS19745																							RHE_RS21355	3	57174	57914	D	24301821	-	RHE_RS21355	WP_011427357.1	246	COG0745	TK	MULTISPECIES: DNA-binding response regulator	4111
RHE_RS26875	R	RHE_RS02400_m1	R	-84	-63	TCCAAAAAAAGGGAAACGCTCG	3.8	5.2e-06	-12167	5284		RHE_RS19750																							RHE_RS21310	3	47889	48626	D	24301830	-	RHE_RS21310	WP_011427347.1	245	COG0741	M	MULTISPECIES: type VI secretion protein	4101
RHE_RS02395	R	RHE_RS02400_m2	R	-66	-45	GCGAAATGAGATAAACTCTCTT	20.2	2.2e-10	-22237	9658		RHE_RS19830																							RHE_RS21205	3	23982	25016	R	24301851	-	RHE_RS21205	WP_011427325.1	344	COG2390	K	MULTISPECIES: sugar-binding transcriptional regulator	4088
RHE_RS02395	R	RHE_RS02400_m2	R	-40	-19	GGAAAATAAGAGAAACTCTCTC	23.0	1.6e-12	-27161	11796		RHE_RS19850																							RHE_RS20915	3	4334234	4335166	R	24298189	-	RHE_RS20915	WP_011427273.1	310	COG1171	E	serine dehydratase	4033
RHE_RS02400	D	RHE_RS02400_m2	D	-80	-59	GGAAAATAAGAGAAACTCTCTC	23.0	1.6e-12	-27161	11796		RHE_RS20045																							RHE_RS20710	3	4293842	4294750	R	24299916	-	RHE_RS20710	WP_011427238.1	302	COG0583	K	LysR family transcriptional regulator	3995
RHE_RS02400	D	RHE_RS02400_m2	D	-54	-33	GCGAAATGAGATAAACTCTCTT	20.2	2.2e-10	-22237	9658		RHE_RS20060																							RHE_RS19020	3	3943129	3943551	D	24300374	-	RHE_RS19020	WP_011426929.1	140	COG0789	K	MULTISPECIES: MerR family DNA-binding transcriptional regulator	3664
RHE_RS26875	R	RHE_RS02400_m2	R	-85	-64	CCAAAAAAAGGGAAACGCTCGC	4.8	7.2e-06	-11841	5143		RHE_RS20080																							RHE_RS18525	3	3833979	3834491	R	24298401	-	RHE_RS18525	WP_020922291.1	170	COG1846	K	MarR family transcriptional regulator	3567
RHE_RS02395	R	RHE_RS02400_m3	R	-68	-50	ATGAGATAAACTCTCTTAT	15.0	4.2e-08	-16986	7377		RHE_RS20110																							RHE_RS18140	3	3737288	3739144	D	24300335	-	RHE_RS18140	WP_020922245.1	618	COG1164	E	oligoendopeptidase PepF/M3 family protein	3490
RHE_RS02395	R	RHE_RS02400_m3	R	-66	-48	AAATGAGATAAACTCTCTT	17.6	4.2e-09	-19288	8377		RHE_RS20285																							RHE_RS18135	3	3735539	3737080	R	24300386	-	RHE_RS18135	WP_011426766.1	513	COG2204	T	sigma-54-dependent Fis family transcriptional regulator	3489
RHE_RS02395	R	RHE_RS02400_m3	R	-44	-26	AAGAGAAACTCTCTCATTT	16.1	1.7e-08	-17890	7770		RHE_RS20325																							RHE_RS17955	3	3700419	3701522	R	24301067	-	RHE_RS17955	WP_011426734.1	367			hypothetical protein	3453
RHE_RS02395	R	RHE_RS02400_m3	R	-42	-24	ATAAGAGAAACTCTCTCAT	18.9	5.5e-10	-21321	9260		RHE_RS20460																							RHE_RS17180	3	3528566	3529744	D	24298285	-	RHE_RS17180	WP_011426592.1	392	COG0845	MV	MexE family multidrug efflux RND transporter periplasmic adaptor subunit	3307
RHE_RS02400	D	RHE_RS02400_m3	D	-75	-57	ATAAGAGAAACTCTCTCAT	18.9	5.5e-10	-21321	9260		RHE_RS20490																							RHE_RS17105	3	3509690	3510607	D	24297690	-	RHE_RS17105	WP_020922115.1	305	COG0697	GER	EamA/RhaT family transporter	3292
RHE_RS02400	D	RHE_RS02400_m3	D	-73	-55	AAGAGAAACTCTCTCATTT	16.1	1.7e-08	-17890	7770		RHE_RS20575																							RHE_RS16765	3	3438060	3439013	D	24299871	-	RHE_RS16765	WP_011426510.1	317	COG3920	T	sensor histidine kinase	3226
RHE_RS02400	D	RHE_RS02400_m3	D	-51	-33	AAATGAGATAAACTCTCTT	17.6	4.2e-09	-19288	8377		RHE_RS20580																							RHE_RS16610	3	3413779	3414735	R	24298705	-	RHE_RS16610	WP_011426480.1	318	COG3021	R	endonuclease	3195
RHE_RS02400	D	RHE_RS02400_m3	D	-49	-31	ATGAGATAAACTCTCTTAT	15.0	4.2e-08	-16986	7377		RHE_RS20595																							RHE_RS16510	3	3388662	3389357	R	24297763	-	RHE_RS16510	WP_020922040.1	231	COG2755	E	SGNH/GDSL hydrolase family protein	3175
RHE_RS20060	R	RHE_RS02400_m3	R	-153	-135	TCGAGAGGGTGGCTCTCAT	5.5	9.1e-06	-11607	5041		RHE_RS20625																							RHE_RS16340	3	3352684	3353586	R	24301342	-	RHE_RS16340	WP_011426428.1	300	COG0583	K	LysR family transcriptional regulator	3143
RHE_RS02395	R	RHE_RS02400_m4	R	-82	-63	TCTTATTTTGATTGTCAACC	18.0	1.6e-09	-20253	8796		RHE_RS20665																							RHE_RS15995	3	3277045	3277941	D	24300166	-	RHE_RS15995	WP_042118871.1	298	COG0583	K	LysR family transcriptional regulator	3077
RHE_RS02400	D	RHE_RS02400_m4	D	-36	-17	TCTTATTTTGATTGTCAACC	18.0	1.6e-09	-20253	8796		RHE_RS20710																							RHE_RS15610	3	3191783	3192793	D	24301611	-	RHE_RS15610	WP_041678717.1	336	COG0714	R	MoxR family ATPase	3005
RHE_RS24090	D	RHE_RS02400_m4	D	-289	-270	GATAATCTTGTTTCTCAAGT	10.1	1.6e-06	-13346	5796		RHE_RS20810																							RHE_RS15590	3	3188849	3189034	D	24297881	-	RHE_RS15590	WP_011426288.1	61	COG5466	S	DUF1059 domain-containing protein	3001
RHE_RS02045	D	RHE_RS02400_m5	D	-108	-82	CCAAATGAGATAAAAAAGCAATTTTTG	-1.0	2.6e-06	-12860	5585		RHE_RS20825																							RHE_RS15480	3	3166791	3169142	D	24298991	-	RHE_RS15480	WP_011426266.1	783	COG3850	T	sensor domain-containing diguanylate cyclase	2980
RHE_RS02395	R	RHE_RS02400_m5	R	-72	-46	CGAAATGAGATAAACTCTCTTATTTTG	28.2	4.6e-14	-30710	13337		RHE_RS20850																							RHE_RS15440	3	3157852	3158700	D	24301673	-	RHE_RS15440	WP_042118833.1	282	COG0682	M	prolipoprotein diacylglyceryl transferase	2972
RHE_RS02395	R	RHE_RS02400_m5	R	-46	-20	GAAAATAAGAGAAACTCTCTCATTTGC	28.5	2.9e-14	-31171	13538		RHE_RS20885																							RHE_RS15350	3	3141774	3144155	D	24298888	-	RHE_RS15350	WP_042118819.1	793	COG2304	R	marine proteobacterial sortase target protein	2954
RHE_RS02400	D	RHE_RS02400_m5	D	-79	-53	GAAAATAAGAGAAACTCTCTCATTTGC	28.5	2.9e-14	-31171	13538		RHE_RS20905																							RHE_RS15160	3	3099332	3100252	R	24298785	-	RHE_RS15160	WP_011426207.1	306	COG2321	R	flagellar biosynthesis protein FlgM	2919
RHE_RS02400	D	RHE_RS02400_m5	D	-53	-27	CGAAATGAGATAAACTCTCTTATTTTG	28.2	4.6e-14	-30710	13337		RHE_RS20915																							RHE_RS14905	3	3049332	3050057	D	24301058	-	RHE_RS14905	WP_020921838.1	241	COG2771	K	LuxR family transcriptional regulator	2869
RHE_RS08960	R	RHE_RS02400_m5	R	-162	-136	CGAAACTTGAGCATCCCGCGGATTTCG	-3.9	7.4e-06	-11814	5131		RHE_RS20950																							RHE_RS14760	3	3018734	3020284	R	24300216	-	RHE_RS14760	WP_011426132.1	516	COG0531	E	amino acid permease	2840
RHE_RS11900	R	RHE_RS02400_m5	R	-95	-69	CCAAATACGACAGCCAAACAGATTTTT	-4.6	9.8e-06	-11533	5009		RHE_RS21205																							RHE_RS14650	3	2993266	2994687	R	24299056	-	RHE_RS14650	WP_011426110.1	473	COG1680	V	6-aminohexanoate-dimer hydrolase	2818
RHE_RS11905	D	RHE_RS02400_m5	D	-211	-185	CCAAATACGACAGCCAAACAGATTTTT	-4.6	9.8e-06	-11533	5009		RHE_RS21210																							RHE_RS14395	3	2933075	2933989	R	24301258	-	RHE_RS14395	WP_011426059.1	304	COG2114	T	adenylate cyclase	2768
RHE_RS15350	D	RHE_RS02400_m5	D	-146	-120	TAAAATCAGAGAGATCGCCGGATTTCA	-3.3	6.0e-06	-12024	5222		RHE_RS21310																							RHE_RS14295	3	2908888	2910597	R	24301198	-	RHE_RS14295	WP_011426041.1	569	COG0265	O	DegQ family serine endoprotease	2750
RHE_RS20060	R	RHE_RS02400_m5	R	-157	-131	AGCATCGAGAGGGTGGCTCTCATTTTC	-1.1	2.8e-06	-12786	5553		RHE_RS21355																							RHE_RS14115	3	2872027	2872935	R	24298049	-	RHE_RS14115	WP_011426004.1	302	COG4977	K	AraC family transcriptional regulator	2715
RHE_RS20575	D	RHE_RS02400_m5	D	-288	-262	CCAAATTATTGATTTCCTCATATTTTT	-1.0	2.6e-06	-12860	5585		RHE_RS21390																							RHE_RS14000	3	2846918	2847355	D	24301433	-	RHE_RS14000	WP_011425982.1	145			DUF2231 domain-containing protein	2693
RHE_RS20665	D	RHE_RS02400_m5	D	-130	-104	CTAACTATGAGGAACAATCATCTTTAA	-1.2	2.9e-06	-12751	5538		RHE_RS21445																							RHE_RS13675	3	2785172	2785969	D	24299795	-	RHE_RS13675	WP_011425921.1	265	COG4312	R	DUF899 domain-containing protein	2630
RHE_RS06095	R	RHE_RS02600_m1	R	-131	-120	GTCGCGCACGAA	10.5	3.8e-06	-12481	5420		RHE_RS21540																							RHE_RS13630	3	2776766	2777152	D	24300459	-	RHE_RS13630	WP_042119270.1	128	COG1917	R	cupin domain-containing protein	2622
RHE_RS09505	D	RHE_RS02600_m1	D	-287	-276	GGCGCGCACAAA	10.7	2.8e-06	-12786	5553		RHE_RS21555																							RHE_RS13440	3	2736976	2737371	R	24299721	-	RHE_RS13440	WP_011425875.1	131			hypothetical protein	2588
RHE_RS22740	D	RHE_RS02600_m2	D	-193	-173	CGCGTCACGAGAGAGACGCGC	10.5	3.8e-06	-12481	5420		RHE_RS21685																							RHE_RS13400	3	2730694	2731512	R	24299882	-	RHE_RS13400	WP_011425867.1	272	COG1622	C	cytochrome-c oxidase	2580
RHE_RS02600	D	RHE_RS02600_m4	D	-147	-132	CGCCCGGGCCCGCCGC	13.3	1.3e-07	-15856	6886		RHE_RS21825																							RHE_RS13190	3	2689288	2689809	R	24301479	-	RHE_RS13190	WP_011425830.1	173	COG1733	K	transcriptional regulator	2544
RHE_RS02600	D	RHE_RS02600_m4	D	-134	-119	CGCCCGGACCAGTCAC	16.1	2.1e-09	-19981	8678		RHE_RS21830																							RHE_RS13090	3	2669194	2669964	D	24301551	-	RHE_RS13090	WP_020921593.1	256	COG2114	T	adenylate/guanylate cyclase domain-containing protein	2524
RHE_RS13075	R	RHE_RS02600_m4	R	-67	-52	CACCCGTACCCGTCCC	11.8	8.4e-07	-13990	6076		RHE_RS21915																							RHE_RS12915	3	2635614	2636633	D	24299323	-	RHE_RS12915	WP_042118637.1	339	COG4977	K	GlxA family transcriptional regulator	2491
RHE_RS15555	D	RHE_RS02600_m4	D	-58	-43	CCCCCGAACCCGTCGC	12.8	2.6e-07	-15163	6585		RHE_RS22015																							RHE_RS12775	3	2612840	2613739	R	24299845	-	RHE_RS12775	WP_011425753.1	299	COG0583	K	LysR family transcriptional regulator	2466
RHE_RS00280	D	RHE_RS02600_m5	D	-172	-148	TTGAAGTTTTTGGGCGAGGAGAACA	1.3	5.9e-06	-12041	5229		RHE_RS22020																							RHE_RS12620	3	2582103	2582894	D	24300665	-	RHE_RS12620	WP_042118605.1	263	COG2207	K	AraC family transcriptional regulator	2435
RHE_RS02600	D	RHE_RS02600_m5	D	-33	-9	TTAAGGCTTGTGCGCGAGGAGACGG	29.1	1.5e-14	-31831	13824		RHE_RS22030																							RHE_RS12285	3	2516398	2517306	D	24299534	-	RHE_RS12285	WP_042118578.1	302	COG0697	GER	EamA/RhaT family transporter	2374
RHE_RS20575	D	RHE_RS02600_m5	D	-370	-346	TTTGGGAGCTTACGCGATGAAACGT	1.5	5.4e-06	-12129	5268		RHE_RS22045																							RHE_RS12090	3	2473741	2474838	D	24300940	-	RHE_RS12090	WP_011425626.1	365			DUF2865 domain-containing protein	2337
RHE_RS00340	D	RHE_RS02710_m1	D	-246	-227	GGGAGGAAATATAACCTGGA	9.9	2.3e-06	-12983	5638		RHE_RS22090																							RHE_RS11340	3	2321563	2321949	R	24299669	-	RHE_RS11340	WP_029531229.1	128	COG0789	K	MULTISPECIES: MerR family DNA-binding transcriptional regulator	2191
RHE_RS02710	R	RHE_RS02710_m1	R	-106	-87	AGGAGGAATAAAATCCTGCT	15.3	3.9e-08	-17060	7409		RHE_RS22145																							RHE_RS10940	3	2238264	2241509	R	24297630	-	RHE_RS10940	WP_011425404.1	1081	COG2114	T	adenylate/guanylate cyclase domain-containing protein	2114
RHE_RS02710	R	RHE_RS02710_m2	R	-98	-88	GGAGGAATAAA	10.6	9.1e-07	-13910	6041		RHE_RS22155																							RHE_RS10775	3	2202890	2204362	D	24301401	-	RHE_RS10775	WP_042118467.1	490	COG0062	F	bifunctional ADP-dependent NAD(P)H-hydrate dehydratase/NAD(P)H-hydrate epimerase	2081
RHE_RS00340	D	RHE_RS02710_m3	D	-246	-227	GGGAGGAAATATAACCTGGA	9.7	2.1e-06	-13074	5678		RHE_RS22190																							RHE_RS10445	3	2131364	2132251	R	24299905	-	RHE_RS10445	WP_011425307.1	295	COG2207	K	AraC family transcriptional regulator	2014
RHE_RS02710	R	RHE_RS02710_m3	R	-106	-87	AGGAGGAATAAAATCCTGCT	15.6	3.0e-08	-17322	7523		RHE_RS22200																							RHE_RS09115	3	1870680	1871921	R	24298860	-	RHE_RS09115	WP_011425075.1	413	COG2223	P	NarK/NasA family nitrate transporter	1756
RHE_RS09265	D	RHE_RS02710_m4	D	-120	-111	TTCTTTACGT	10.4	7.1e-06	-11855	5149		RHE_RS22245																							RHE_RS09080	3	1862137	1862796	D	24298071	-	RHE_RS09080	WP_011425068.1	219	COG3806	T	transcriptional regulator	1749
RHE_RS00340	D	RHE_RS02710_m5	D	-246	-227	GGGAGGAAATATAACCTGGA	8.0	7.1e-06	-11855	5149		RHE_RS22260																							RHE_RS09075	3	1860876	1861913	R	24298072	-	RHE_RS09075	WP_011425067.1	345	COG0031	E	MULTISPECIES: cysteine synthase A	1748
RHE_RS02710	R	RHE_RS02710_m5	R	-106	-87	AGGAGGAATAAAATCCTGCT	16.2	1.2e-08	-18238	7921		RHE_RS22395																							RHE_RS09030	3	1852357	1854345	R	24300915	-	RHE_RS09030	WP_011425058.1	662	COG0737	FV	bifunctional 2\',3\'-cyclic-nucleotide 2\'-phosphodiesterase/3\'-nucleotidase	1740
RHE_RS06160	R	RHE_RS02710_m5	R	-110	-91	CTGAGGCAAATTTTCCTCCG	7.5	8.8e-06	-11641	5056		RHE_RS22460																							RHE_RS08025	3	1653220	1654098	R	24300585	-	RHE_RS08025	WP_042119226.1	292	COG0583	K	LysR family transcriptional regulator	1551
RHE_RS02715	R	RHE_RS02715_m1	R	-25	-10	TCCCTCCCAAGAGCCC	14.4	2.2e-08	-17632	7658		RHE_RS22560																							RHE_RS07935	3	1633676	1634290	R	24298477	-	RHE_RS07935	WP_011424882.1	204	COG0456	J	N-acetyltransferase	1533
RHE_RS13735	R	RHE_RS02715_m1	R	-83	-68	GGCCTCTCAAGAGGGT	13.4	2.8e-07	-15088	6553		RHE_RS22600																							RHE_RS07480	3	1538983	1539567	R	24297891	-	RHE_RS07480	WP_011424799.1	194	COG1309	K	TetR/AcrR family transcriptional regulator	1446
RHE_RS18665	R	RHE_RS02715_m1	R	-182	-167	GCCCTCCGGAGAGGGC	10.7	3.3e-06	-12622	5481		RHE_RS22605																							RHE_RS07440	3	1529839	1530765	R	24298346	-	RHE_RS07440	WP_011424791.1	308	COG0673	R	gfo/Idh/MocA family oxidoreductase	1438
RHE_RS32825	R	RHE_RS02715_m1	R	-391	-376	ACCCTCCTAAGAGCCT	14.0	7.6e-08	-16393	7119		RHE_RS22610																							RHE_RS07105	3	1465826	1466578	D	24300133	-	RHE_RS07105	WP_011424727.1	250	COG0664	T	Crp/Fnr family transcriptional regulator	1370
RHE_RS05965	D	RHE_RS02715_m2	D	-158	-147	GGGGGAGGGACT	10.8	1.9e-06	-13174	5721		RHE_RS22620																							RHE_RS07055	3	1456393	1457277	D	24298446	-	RHE_RS07055	WP_011424717.1	294	COG0329	EM	4-hydroxy-tetrahydrodipicolinate synthase	1359
RHE_RS09410	D	RHE_RS02715_m2	D	-19	-8	GTGGGAGGGACC	11.8	2.5e-07	-15202	6602		RHE_RS22625																							RHE_RS06280	3	1280319	1280837	R	24300291	-	RHE_RS06280	WP_011424564.1	172	COG3797	S	DUF1697 domain-containing protein	1205
RHE_RS30465	R	RHE_RS02715_m2	R	-15	-4	TCGGGAGGGACA	9.8	7.8e-06	-11761	5108		RHE_RS22630																							RHE_RS06265	3	1274507	1276846	R	24298979	-	RHE_RS06265	WP_011424561.1	779	COG4993	G	glucose/quinate/shikimate family membrane-bound PQQ-dependent dehydrogenase	1202
RHE_RS25905	R	RHE_RS02715_m3	R	-243	-232	TATGCAAGCAGA	10.8	2.1e-06	-13074	5678		RHE_RS22640																							RHE_RS06175	3	1257609	1258301	R	24298525	-	RHE_RS06175	WP_011424544.1	230	COG2378	K	YafY family transcriptional regulator	1184
RHE_RS29825	D	RHE_RS02715_m3	D	-314	-303	TCTGCAAGCAGG	10.8	2.1e-06	-13074	5678		RHE_RS22705																							RHE_RS06095	3	1241846	1242889	R	24298148	-	RHE_RS06095	WP_011424528.1	347	COG1064	G	alcohol dehydrogenase	1167
RHE_RS09390	D	RHE_RS02715_m4	D	-361	-351	CGCTTGGGAGG	12.0	1.3e-06	-13553	5886		RHE_RS22710																							RHE_RS06065	3	1235837	1236292	D	24301377	-	RHE_RS06065	WP_011424522.1	151	COG1051	F	NUDIX domain-containing protein	1161
RHE_RS15675	D	RHE_RS02715_m4	D	-156	-146	CCCTTGGGAAG	10.5	3.3e-06	-12622	5481		RHE_RS22740																							RHE_RS05640	3	1153311	1154732	D	24298937	-	RHE_RS05640	WP_011424445.1	473			hypothetical protein	1081
RHE_RS19065	D	RHE_RS02715_m4	D	-333	-323	CGCTTGGGAGC	9.4	6.6e-06	-11928	5180		RHE_RS22770																							RHE_RS05555	3	1137596	1137928	D	24297905	-	RHE_RS05555	WP_011424430.1	110			MULTISPECIES: hypothetical protein	1066
RHE_RS23915	R	RHE_RS02715_m4	R	-280	-270	CGCTTGGGAGG	12.0	1.3e-06	-13553	5886		RHE_RS22790																							RHE_RS05420	3	1112240	1113556	D	24300572	-	RHE_RS05420	WP_011424405.1	438			alkyl/aryl-sulfatase	1040
RHE_RS23920	D	RHE_RS02715_m4	D	-18	-8	CGCTTGGGAGG	12.0	1.3e-06	-13553	5886		RHE_RS22795																							RHE_RS05415	3	1111189	1112082	R	24299353	-	RHE_RS05415	WP_011424404.1	297	COG0583	K	LysR family transcriptional regulator	1039
RHE_RS26860	R	RHE_RS02715_m4	R	-37	-27	CGCTTGGGAAG	9.5	6.6e-06	-11928	5180		RHE_RS22830																							RHE_RS05020	3	1040948	1041634	R	24301172	-	RHE_RS05020	WP_011424339.1	228	COG0640	K	ArsR family transcriptional regulator	963
RHE_RS02715	R	RHE_RS02715_m5	R	-39	-29	CATGCTGCATG	10.4	1.6e-06	-13346	5796		RHE_RS22955																							RHE_RS05000	3	1038395	1039291	D	24297850	-	RHE_RS05000	WP_011424335.1	298	COG0583	K	LysR family transcriptional regulator	959
RHE_RS02765	R	RHE_RS02765_m1	R	-47	-29	AATATATCCATGATTATGC	16.1	1.5e-08	-18015	7824		RHE_RS22960																							RHE_RS04995	3	1036892	1038217	R	24297851	-	RHE_RS04995	WP_042119179.1	441	COG0477	GEPR	MFS transporter	958
RHE_RS02765	R	RHE_RS02765_m1	R	-31	-13	TCCTTATCGTGGATAAAAT	8.5	4.7e-06	-12268	5328		RHE_RS23020																							RHE_RS04315	3	898509	899243	D	24297576	-	RHE_RS04315	WP_042117980.1	244	COG2197	TK	LuxR family transcriptional regulator	826
RHE_RS02765	R	RHE_RS02765_m2	R	-40	-20	CGTGGATAAAATATATCCATG	23.8	4.2e-12	-26196	11377		RHE_RS23050																							RHE_RS04265	3	887576	887806	R	24298457	-	RHE_RS04265	WP_011424196.1	76			MULTISPECIES: DUF2093 domain-containing protein	816
RHE_RS09025	D	RHE_RS02765_m2	D	-36	-16	TGTCGATCGAAACTATCGACG	4.3	4.1e-06	-12405	5387		RHE_RS23055																							RHE_RS03770	3	782432	782968	D	24299160	-	RHE_RS03770	WP_011424104.1	178	COG0457	R	tetratricopeptide repeat protein	720
RHE_RS14185	R	RHE_RS02765_m2	R	-117	-97	TAAGGATATTAATTGTCCTTA	5.3	2.6e-06	-12860	5585		RHE_RS23065																							RHE_RS03175	3	648102	648479	D	24300681	-	RHE_RS03175	WP_011423992.1	125	COG0745	TK	response regulator	605
RHE_RS14185	R	RHE_RS02765_m2	R	-98	-78	TAAGGATATCTTTTATCCATA	12.1	7.6e-08	-16393	7119		RHE_RS23080																							RHE_RS03170	3	645763	647907	R	24300682	-	RHE_RS03170	WP_042117875.1	714	COG1807	M	PAS domain-containing sensor histidine kinase	604
RHE_RS14190	D	RHE_RS02765_m2	D	-58	-38	TAAGGATATCTTTTATCCATA	12.1	7.6e-08	-16393	7119		RHE_RS23105																							RHE_RS03000	3	612592	613485	D	24300061	-	RHE_RS03000	WP_011423958.1	297	COG0583	K	LysR family transcriptional regulator	570
RHE_RS14190	D	RHE_RS02765_m2	D	-39	-19	TAAGGATATTAATTGTCCTTA	5.3	2.6e-06	-12860	5585		RHE_RS23110																							RHE_RS02835	3	582782	583225	R	24301251	-	RHE_RS02835	WP_011423930.1	147	COG1846	K	MarR family transcriptional regulator	540
RHE_RS14210	R	RHE_RS02765_m2	R	-59	-39	TAAGGATATATGTTATCCGCA	9.4	3.4e-07	-14894	6469		RHE_RS23130																							RHE_RS02830	3	582428	582637	D	24298028	-	RHE_RS02830	WP_011423929.1	69	COG1278	K	MULTISPECIES: cold-shock protein	539
RHE_RS16260	D	RHE_RS02765_m2	D	-47	-27	CGAAGGTATCTATTGTCCACG	5.5	2.4e-06	-12940	5620		RHE_RS23180																							RHE_RS02555	3	521589	522548	R	24300949	-	RHE_RS02555	WP_011423880.1	319	COG2070	R	nitronate monooxygenase	487
RHE_RS22145	R	RHE_RS02765_m2	R	-109	-89	CCTGGAGAAATTTTATCGTCG	9.1	4.2e-07	-14683	6377		RHE_RS23195																							RHE_RS02315	3	468071	469603	R	24299253	-	RHE_RS02315	WP_011423834.1	510	COG0457	R	transcriptional regulator	440
RHE_RS31005	D	RHE_RS02765_m2	D	-41	-21	TTTGGATATAAAATATCCGTT	4.2	4.3e-06	-12357	5367		RHE_RS23240																							RHE_RS02190	3	446286	447356	R	24300652	-	RHE_RS02190	WP_011423813.1	356	COG3920	T	sensor histidine kinase	418
RHE_RS02765	R	RHE_RS02765_m3	R	-46	-20	CGTGGATAAAATATATCCATGATTATG	28.8	1.5e-14	-31831	13824		RHE_RS23310																							RHE_RS01975	3	405692	406561	R	24297889	-	RHE_RS01975	WP_011423772.1	289	COG3176	R	GNAT family N-acetyltransferase	376
RHE_RS09025	D	RHE_RS02765_m3	D	-36	-10	TGTCGATCGAAACTATCGACGGAATGG	-1.7	9.3e-06	-11585	5032		RHE_RS23325																							RHE_RS01430	3	293168	293611	D	24301601	-	RHE_RS01430	WP_042117749.1	147	COG1846	K	MarR family transcriptional regulator	272
RHE_RS13400	R	RHE_RS02765_m3	R	-93	-67	CACAAATAGAAAATGTCGGCAATTACG	-1.1	7.4e-06	-11814	5131		RHE_RS23350																							RHE_RS01355	3	279577	280074	R	24298069	-	RHE_RS01355	WP_011423653.1	165	COG3685	P	MULTISPECIES: ferritin-like domain-containing protein	257
RHE_RS14185	R	RHE_RS02765_m3	R	-123	-97	TAAGGATATTAATTGTCCTTAATTAGA	10.3	4.5e-08	-16917	7347		RHE_RS23360																							RHE_RS01350	3	278641	279549	D	24301226	-	RHE_RS01350	WP_011423652.1	302	COG0583	K	LysR family transcriptional regulator	256
RHE_RS14185	R	RHE_RS02765_m3	R	-104	-78	TAAGGATATCTTTTATCCATAAGGATA	5.0	5.9e-07	-14343	6229		RHE_RS23435																							RHE_RS01345	3	277522	278517	R	24301227	-	RHE_RS01345	WP_011423651.1	331	COG0667	R	aldo/keto reductase	255
RHE_RS14190	D	RHE_RS02765_m3	D	-58	-32	TAAGGATATCTTTTATCCATAAGGATA	5.0	5.9e-07	-14343	6229		RHE_RS23470																							RHE_RS01185	3	249731	250483	R	24299691	-	RHE_RS01185	WP_042117737.1	250	COG1475	D	hypothetical protein	224
RHE_RS14190	D	RHE_RS02765_m3	D	-39	-13	TAAGGATATTAATTGTCCTTAATTAGA	10.3	4.5e-08	-16917	7347		RHE_RS23520																							RHE_RS00280	3	56043	56537	D	24299748	-	RHE_RS00280	WP_011423458.1	164	COG5321	S	MULTISPECIES: DNA repair protein MmcB-related protein	54
RHE_RS14210	R	RHE_RS02765_m3	R	-65	-39	TAAGGATATATGTTATCCGCAAATCGA	10.4	4.3e-08	-16962	7367		RHE_RS23540																							RHE_RS00195	3	41647	42084	D	24298517	-	RHE_RS00195	WP_011423442.1	145	COG1186	J	aminoacyl-tRNA hydrolase	37
RHE_RS16260	D	RHE_RS02765_m3	D	-47	-21	CGAAGGTATCTATTGTCCACGAATGCC	2.7	1.7e-06	-13285	5770		RHE_RS23555																							RHE_RS33140	2	313546	313737	D	31930227	-	RHE_RS33140	WP_004674400.1	63			MULTISPECIES: nitrogen fixation transcriptional regulator protein	5940
RHE_RS22145	R	RHE_RS02765_m3	R	-115	-89	CCTGGAGAAATTTTATCGTCGGCTCTG	1.4	2.7e-06	-12822	5569		RHE_RS23565																							RHE_RS32295	2	132511	132822	R	30584611	-	RHE_RS32295	WP_011428433.1	103			hypothetical protein	5202
RHE_RS28695	R	RHE_RS02765_m3	R	-53	-27	CGAGTATAGTTATTCTCTGGGATAATA	3.5	1.1e-06	-13720	5959		RHE_RS23635																							RHE_RS31950	2	53156	53323	D	30584542	-	RHE_RS31950	WP_011427352.1	55			MULTISPECIES: type IV secretion system lipoprotein VirB7	4106
RHE_RS31005	D	RHE_RS02765_m3	D	-41	-15	TTTGGATATAAAATATCCGTTGTTTGG	0.1	4.6e-06	-12289	5337		RHE_RS23640																							RHE_RS30630	2	262523	263452	D	24297295	-	RHE_RS30630	WP_008536525.1	309	COG0142	H	MULTISPECIES: farnesyltranstransferase	5891
RHE_RS02765	R	RHE_RS02765_m4	R	-29	-14	CCTTATCGTGGATAAA	16.5	2.1e-09	-19981	8678		RHE_RS23665																							RHE_RS30545	2	247378	248316	D	24297268	-	RHE_RS30545	WP_008536543.1	312			MULTISPECIES: SIR2 family protein	5879
RHE_RS20810	D	RHE_RS02765_m4	D	-83	-68	TATTTTCTTCGATACA	8.9	9.2e-06	-11596	5036		RHE_RS23680																							RHE_RS30080	2	148421	149524	D	24297263	-	RHE_RS30080	WP_004671507.1	367	COG1062	R	MULTISPECIES: NAD(P)-dependent alcohol dehydrogenase	5791
RHE_RS02765	R	RHE_RS02765_m5	R	-45	-30	ATATATCCATGATTAT	16.2	9.3e-09	-18493	8032		RHE_RS23690																							RHE_RS29240	2	605968	606693	D	24302795	-	RHE_RS29240	WP_011428843.1	241	COG1028	IQR	SDR family NAD(P)-dependent oxidoreductase	5628
RHE_RS07425	R	RHE_RS02765_m5	R	-21	-6	GAATATCTACGAAACT	7.8	9.4e-06	-11575	5027		RHE_RS23735																							RHE_RS29195	2	594574	595299	D	24302804	-	RHE_RS29195	WP_011428833.1	241	COG0745	TK	DNA-binding response regulator	5619
RHE_RS07430	D	RHE_RS02765_m5	D	-142	-127	GAATATCTACGAAACT	7.8	9.4e-06	-11575	5027		RHE_RS23775																							RHE_RS29190	2	594109	594441	D	24302805	-	RHE_RS29190	WP_011428832.1	110			hypothetical protein	5618
RHE_RS16815	D	RHE_RS02765_m5	D	-72	-57	ATATATCGTTGAAAAT	9.6	3.6e-06	-12535	5444		RHE_RS23835																							RHE_RS29175	2	591670	592635	D	24302808	-	RHE_RS29175	WP_011428829.1	321	COG1262	O	nitrate reductase	5615
RHE_RS02835	R	RHE_RS02835_m1	R	-80	-59	TGATGACAATACATTGTCATAT	15.9	1.3e-08	-18158	7886		RHE_RS23840																							RHE_RS28695	2	487756	488760	R	24302904	-	RHE_RS28695	WP_011428740.1	334	COG2207	K	AraC family transcriptional regulator	5523
RHE_RS02835	R	RHE_RS02835_m1	R	-44	-23	GTTTGACAACATGTTGTCTATT	21.0	6.0e-11	-23537	10222		RHE_RS23865																							RHE_RS28380	2	423242	424147	D	24302967	-	RHE_RS28380	WP_041679317.1	301	COG1175	G	sugar ABC transporter permease	5462
RHE_RS12760	D	RHE_RS02835_m1	D	-42	-21	TCGCGGCAGCATGTTGTCTAAG	5.9	9.4e-06	-11575	5027		RHE_RS23885																							RHE_RS28305	2	405850	406326	R	24302982	-	RHE_RS28305	WP_004679019.1	158	COG1522	K	MULTISPECIES: Lrp/AsnC family transcriptional regulator	5447
RHE_RS02835	R	RHE_RS02835_m2	R	-80	-59	TGATGACAATACATTGTCATAT	16.8	5.4e-09	-19037	8268		RHE_RS23890																							RHE_RS27880	2	308632	309513	D	24303067	-	RHE_RS27880	WP_011428586.1	293	COG0491	R	MBL fold metallo-hydrolase	5365
RHE_RS02835	R	RHE_RS02835_m2	R	-44	-23	GTTTGACAACATGTTGTCTATT	21.2	6.7e-11	-23426	10174		RHE_RS23915																							RHE_RS27750	2	274051	275121	D	24303093	-	RHE_RS27750	WP_011428563.1	356	COG1609	K	LacI family transcriptional regulator	5337
RHE_RS06175	R	RHE_RS02835_m2	R	-46	-25	TCCTGACAATACACTGTCAGTT	4.8	7.5e-06	-11801	5125		RHE_RS23920																							RHE_RS27455	2	206683	207675	R	24303152	-	RHE_RS27455	WP_011428505.1	330	COG1853	C	flavin reductase	5280
RHE_RS12760	D	RHE_RS02835_m2	D	-42	-21	TCGCGGCAGCATGTTGTCTAAG	5.7	4.9e-06	-12226	5310		RHE_RS23945																							RHE_RS26640	2	45284	45604	D	24303315	-	RHE_RS26640	WP_011428355.1	106			MULTISPECIES: hypothetical protein	5118
RHE_RS13150	D	RHE_RS02835_m2	D	-129	-108	TAAGCACATCATATTGTCGATT	4.9	7.1e-06	-11855	5149		RHE_RS24010																							RHE_RS26295	2	479537	479803	R	24302304	-	RHE_RS26295	WP_004668299.1	88			MULTISPECIES: hypothetical protein	5050
RHE_RS16815	D	RHE_RS02835_m2	D	-35	-14	AATCGACAGAATGGTGCCATCA	4.7	7.8e-06	-11761	5108		RHE_RS24090																							RHE_RS25835	2	382223	382942	D	24302396	-	RHE_RS25835	WP_042119925.1	239	COG2186	K	FadR family transcriptional regulator	4958
RHE_RS26235	R	RHE_RS02835_m2	R	-74	-53	TTCTGTCATCATGCTGTCATTC	5.1	6.5e-06	-11944	5187		RHE_RS24095																							RHE_RS25805	2	375775	376683	D	24302402	-	RHE_RS25805	WP_086005048.1	302	COG0601	EP	ABC transporter permease	4952
RHE_RS02835	R	RHE_RS02835_m3	R	-81	-68	TACATTGTCATATA	12.2	7.9e-07	-14051	6102		RHE_RS24100																							RHE_RS25240	2	267145	267960	D	24302515	-	RHE_RS25240	WP_011428088.1	271	COG3568	R	MULTISPECIES: EEP domain-containing protein	4843
RHE_RS10220	D	RHE_RS02835_m3	D	-25	-12	CATGATGTCATATA	10.8	2.9e-06	-12751	5538		RHE_RS24110																							RHE_RS25170	2	255016	255498	D	24302529	-	RHE_RS25170	WP_011428076.1	160	COG1522	K	Lrp/AsnC family transcriptional regulator	4829
RHE_RS14000	D	RHE_RS02835_m3	D	-150	-137	CACATTGTCATTCC	10.0	5.3e-06	-12148	5276		RHE_RS24140																							RHE_RS25165	2	253420	254919	R	24302530	-	RHE_RS25165	WP_011428075.1	499	COG0520	E	aminotransferase class V-fold PLP-dependent enzyme	4828
RHE_RS22145	R	RHE_RS02835_m3	R	-245	-232	AATGTTGTCAAATC	9.8	6.8e-06	-11899	5167		RHE_RS24195																							RHE_RS24745	2	167489	167854	D	24302614	-	RHE_RS24745	WP_011427997.1	121	COG0346	Q	lactoylglutathione lyase	4749
RHE_RS26235	R	RHE_RS02835_m3	R	-75	-62	CATGCTGTCATTCT	10.1	5.0e-06	-12206	5301		RHE_RS24245																							RHE_RS24490	2	105338	106345	D	24302665	-	RHE_RS24490	WP_011427949.1	335	COG0601	EP	ABC transporter permease	4698
RHE_RS02835	R	RHE_RS02835_m4	R	-80	-59	TGATGACAATACATTGTCATAT	16.6	6.6e-09	-18836	8180		RHE_RS24290																							RHE_RS24245	2	59352	60527	R	24302714	-	RHE_RS24245	WP_011427903.1	391			DUF3095 domain-containing protein	4648
RHE_RS02835	R	RHE_RS02835_m4	R	-44	-23	GTTTGACAACATGTTGTCTATT	21.1	7.2e-11	-23354	10143		RHE_RS24300																							RHE_RS24195	2	43344	46058	R	24302724	-	RHE_RS24195	WP_011427893.1	904	COG1132	V	ABC transporter ATP-binding protein	4638
RHE_RS06175	R	RHE_RS02835_m4	R	-46	-25	TCCTGACAATACACTGTCAGTT	4.9	8.3e-06	-11699	5081		RHE_RS24320																							RHE_RS23735	2	189860	190873	D	24302102	-	RHE_RS23735	WP_011427803.1	337	COG3608	R	deacylase	4548
RHE_RS12760	D	RHE_RS02835_m4	D	-42	-21	TCGCGGCAGCATGTTGTCTAAG	6.2	4.4e-06	-12334	5357		RHE_RS24360																							RHE_RS23435	2	121648	122232	R	24302162	-	RHE_RS23435	WP_011427742.1	194	COG1335	HR	MULTISPECIES: cysteine hydrolase	4486
RHE_RS13150	D	RHE_RS02835_m4	D	-129	-108	TAAGCACATCATATTGTCGATT	6.5	3.8e-06	-12481	5420		RHE_RS24425																							RHE_RS23360	2	108273	109391	R	24302177	-	RHE_RS23360	WP_011427729.1	372	COG1175	G	sugar ABC transporter permease	4475
RHE_RS16815	D	RHE_RS02835_m4	D	-35	-14	AATCGACAGAATGGTGCCATCA	4.7	9.2e-06	-11596	5036		RHE_RS24475																							RHE_RS23020	2	30830	31081	D	24302245	-	RHE_RS23020	WP_011427661.1	83	COG3609	K	MULTISPECIES: transcriptional regulator	4407
RHE_RS26235	R	RHE_RS02835_m4	R	-74	-53	TTCTGTCATCATGCTGTCATTC	5.1	7.9e-06	-11749	5102		RHE_RS24490																							RHE_RS22770	2	167203	168123	D	24301888	-	RHE_RS22770	WP_041678940.1	306	COG2169	L	AraC family transcriptional regulator	4358
RHE_RS02835	R	RHE_RS02835_m5	R	-99	-71	ATTGTCATATAGACAAGCAGAACGCAACG	16.1	4.8e-09	-19155	8319		RHE_RS24540																							RHE_RS22605	2	130935	132008	D	24301921	-	RHE_RS22605	WP_011427582.1	357	COG1609	K	LacI family transcriptional regulator	4326
RHE_RS06875	R	RHE_RS02835_m5	R	-180	-152	CTTGTCAAAATGGTCCAAATATTCCAAAA	10.1	4.9e-06	-12226	5310		RHE_RS24545																							RHE_RS22600	2	129766	130800	R	24301922	-	RHE_RS22600	WP_020922725.1	344	COG0673	R	gfo/Idh/MocA family oxidoreductase	4325
RHE_RS09265	D	RHE_RS02835_m5	D	-237	-209	GTTGTCGGATTGATACATCTTCCGCAATG	10.5	3.2e-06	-12652	5495		RHE_RS24570																							RHE_RS22200	2	42801	43328	R	24302002	-	RHE_RS22200	WP_011427506.1	175	COG3652	S	DUF4142 domain-containing protein	4250
RHE_RS22155	R	RHE_RS02835_m5	R	-237	-209	GTTGACATATTTACAATAACGAGAGAACG	11.2	1.7e-06	-13285	5770		RHE_RS24615																							RHE_RS22090	2	18664	19437	D	24302024	-	RHE_RS22090	WP_011427484.1	257	COG1349	KG	DeoR/GlpR transcriptional regulator	4228
RHE_RS22960	D	RHE_RS02835_m5	D	-204	-176	ATTGTCGATGCCACTGCGCATAGGCAATT	9.5	8.1e-06	-11724	5092		RHE_RS24620																							RHE_RS21915	2	179066	179806	R	24301709	-	RHE_RS21915	WP_032490539.1	246	COG2771	K	LuxR family transcriptional regulator	4195
RHE_RS25035	R	RHE_RS02855_m1	R	-111	-99	TACTAATGCAAAA	10.7	4.4e-06	-12334	5357		RHE_RS24660																							RHE_RS21210	2	25123	26454	D	24301850	-	RHE_RS21210	WP_011427326.1	443	COG0371	C	MULTISPECIES: glycerol-1-phosphate dehydrogenase	4089
RHE_RS30525	D	RHE_RS02855_m1	D	-81	-69	TCTTAAAGCAAAT	10.2	6.0e-06	-12024	5222		RHE_RS24735																							RHE_RS20625	2	4274347	4275123	D	24297746	-	RHE_RS20625	WP_020922565.1	258	COG2188	K	GntR family transcriptional regulator	3978
RHE_RS02855	D	RHE_RS02855_m2	D	-129	-103	CCTTAAAGCTAACCTGTTGCGTTAGCT	23.9	3.3e-12	-26437	11481		RHE_RS24745																							RHE_RS20285	2	4193915	4194598	D	24300121	-	RHE_RS20285	WP_011427159.1	227	COG0745	TK	MULTISPECIES: DNA-binding response regulator	3910
RHE_RS25465	D	RHE_RS02855_m2	D	-235	-209	CCCTAAGTCTAGTGCTTAGCGCTTACG	4.4	5.8e-06	-12058	5237		RHE_RS24755																							RHE_RS20110	2	4162525	4163085	D	24298118	-	RHE_RS20110	WP_011427123.1	186	COG1595	K	RNA polymerase sigma factor RpoE	3873
RHE_RS02855	D	RHE_RS02855_m3	D	-129	-103	CCTTAAAGCTAACCTGTTGCGTTAGCT	24.6	1.0e-12	-27631	12000		RHE_RS24760																							RHE_RS20045	2	4150485	4150925	R	24298181	-	RHE_RS20045	WP_011427112.1	146			hypothetical protein	3860
RHE_RS02855	D	RHE_RS02855_m3	D	-83	-57	CGCAAAGGCAAATTATTTGCGTTTATG	9.9	2.5e-07	-15202	6602		RHE_RS24850																							RHE_RS19850	2	4113069	4113569	R	24299477	-	RHE_RS19850	WP_011427076.1	166	COG3038	C	cytochrome b	3821
RHE_RS02855	D	RHE_RS02855_m4	D	-77	-63	GGCAAATTATTTGCG	13.9	1.3e-07	-15856	6886		RHE_RS24860																							RHE_RS19745	2	4091498	4092391	R	24301476	-	RHE_RS19745	WP_011427055.1	297	COG0583	K	MULTISPECIES: LysR family transcriptional regulator	3800
RHE_RS02855	D	RHE_RS02855_m4	D	-51	-37	GTCAAAGATTTTGAA	12.4	1.2e-06	-13633	5921		RHE_RS24975																							RHE_RS19695	2	4080725	4081153	R	24298367	-	RHE_RS19695	WP_011427046.1	142	COG1522	K	MULTISPECIES: Lrp/AsnC family transcriptional regulator	3791
RHE_RS15155	R	RHE_RS02855_m4	R	-109	-95	TTCAAAGTTTTTGAT	11.4	1.8e-06	-13228	5745		RHE_RS24980																							RHE_RS19690	2	4074287	4080706	D	24298368	-	RHE_RS19690	WP_011427045.1	2139	COG2911	U	translocation/assembly module TamB	3790
RHE_RS15830	R	RHE_RS02855_m4	R	-197	-183	CGCAAAGCCTTTGCG	9.1	9.6e-06	-11554	5018		RHE_RS25025																							RHE_RS19295	2	4003363	4004343	D	24301643	-	RHE_RS19295	WP_011426975.1	326	COG0667	R	aldo/keto reductase	3713
RHE_RS20490	D	RHE_RS02855_m4	D	-169	-155	TGCAAATAATTTTCT	9.4	7.3e-06	-11828	5137		RHE_RS25035																							RHE_RS19045	2	3948407	3949003	D	24300438	-	RHE_RS19045	WP_011426934.1	198	COG0693	R	protease	3669
RHE_RS02855	D	RHE_RS02855_m5	D	-129	-101	CCTTAAAGCTAACCTGTTGCGTTAGCTCC	9.0	1.4e-07	-15782	6854		RHE_RS25040																							RHE_RS18840	2	3900186	3900845	R	24301158	-	RHE_RS18840	WP_020922336.1	219	COG3932	S	exopolysaccharide biosynthesis ExoD family protein	3629
RHE_RS02855	D	RHE_RS02855_m5	D	-83	-55	CGCAAAGGCAAATTATTTGCGTTTATGCT	22.1	3.1e-11	-24197	10509		RHE_RS25060																							RHE_RS18340	2	3783396	3784073	D	24298546	-	RHE_RS18340	WP_011426802.1	225	COG0745	TK	DNA-binding response regulator	3530
RHE_RS15830	R	RHE_RS02855_m5	R	-205	-177	TTGCAACGCAAAGCCTTTGCGATAAGGTG	2.9	2.4e-06	-12940	5620		RHE_RS25120																							RHE_RS17845	2	3678429	3679412	D	24300875	-	RHE_RS17845	WP_011426715.1	327	COG0451	M	NAD(P)-dependent oxidoreductase	3431
RHE_RS25465	D	RHE_RS02855_m5	D	-235	-207	CCCTAAGTCTAGTGCTTAGCGCTTACGTC	3.6	1.7e-06	-13285	5770		RHE_RS25165																							RHE_RS17840	2	3677794	3678330	D	24300876	-	RHE_RS17840	WP_011426714.1	178	COG1396	K	XRE family transcriptional regulator	3430
RHE_RS03000	D	RHE_RS03000_m1	D	-72	-62	ACCGATTACTT	10.4	3.0e-06	-12717	5523		RHE_RS25170																							RHE_RS17805	2	3668523	3669086	D	24298903	-	RHE_RS17805	WP_011426707.1	187	COG2318	S	hypothetical protein	3423
RHE_RS16330	D	RHE_RS03000_m1	D	-151	-141	AGCGATTATTT	10.2	3.9e-06	-12455	5409		RHE_RS25180																							RHE_RS17260	2	3546151	3547035	D	24297791	-	RHE_RS17260	WP_011426607.1	294	COG1175	G	sugar ABC transporter permease	3323
RHE_RS23775	D	RHE_RS03000_m1	D	-177	-167	ACCGATTATCT	10.7	2.5e-06	-12899	5602		RHE_RS25185																							RHE_RS17210	2	3536736	3537506	D	24298430	-	RHE_RS17210	WP_011426598.1	256	COG3622	G	hydroxypyruvate isomerase	3313
RHE_RS28890	D	RHE_RS03000_m1	D	-127	-117	ACCGATTACTC	10.4	3.0e-06	-12717	5523		RHE_RS25205																							RHE_RS17205	2	3535807	3536595	R	24298698	-	RHE_RS17205	WP_011426597.1	262	COG1028	IQR	KR domain-containing protein	3312
RHE_RS00340	D	RHE_RS03000_m2	D	-69	-44	TTTCATACTATCTTATACCTGCCATC	9.9	6.4e-06	-11959	5194		RHE_RS25240																							RHE_RS16970	2	3480503	3482407	R	24299629	-	RHE_RS16970	WP_042118950.1	634	COG0671	I	phosphatase PAP2 family protein	3266
RHE_RS03000	D	RHE_RS03000_m2	D	-95	-70	TCTCCTTTGCTTGAGTACACCCCACC	13.8	7.6e-08	-16393	7119		RHE_RS25290																							RHE_RS16740	2	3435052	3435396	D	24298212	-	RHE_RS16740	WP_011426506.1	114	COG4575	J	DUF883 domain-containing protein	3221
RHE_RS15160	R	RHE_RS03000_m2	R	-265	-240	GTTCCTTGTCTTTTGGATCTACCATC	10.2	4.4e-06	-12334	5357		RHE_RS25335																							RHE_RS16135	2	3308142	3309131	D	24298485	-	RHE_RS16135	WP_011426389.1	329	COG2207	K	AraC family transcriptional regulator	3104
RHE_RS18650	D	RHE_RS03000_m2	D	-222	-197	GCTCCATCACCTTGAACTAGTCCACA	10.2	4.4e-06	-12334	5357		RHE_RS25455																							RHE_RS16110	2	3301070	3302455	R	24299144	-	RHE_RS16110	WP_011426384.1	461	COG0477	GEPR	MFS transporter	3099
RHE_RS03000	D	RHE_RS03000_m3	D	-70	-41	CGATTACTTTGCGTCCTCTCCCATGATAAG	17.2	4.2e-10	-21591	9377		RHE_RS25465																							RHE_RS16035	2	3286319	3286930	D	24300041	-	RHE_RS16035	WP_011426371.1	203			CDP-alcohol phosphatidyltransferase family protein	3085
RHE_RS04995	R	RHE_RS03000_m3	R	-171	-142	TCATTTGCGTGTGACGCCATGTCTGATAGG	10.9	2.1e-06	-13074	5678		RHE_RS25540																							RHE_RS16030	2	3284336	3286120	R	24300042	-	RHE_RS16030	WP_011426370.1	594	COG2226	H	hypothetical protein	3084
RHE_RS05000	D	RHE_RS03000_m3	D	-40	-11	TCATTTGCGTGTGACGCCATGTCTGATAGG	10.9	2.1e-06	-13074	5678		RHE_RS25565																							RHE_RS15970	2	3270886	3271662	D	24300096	-	RHE_RS15970	WP_011426359.1	258	COG1028	IQR	3-hydroxybutyrate dehydrogenase	3071
RHE_RS10680	D	RHE_RS03000_m3	D	-72	-43	CGATTTACAAAAGTAATACTATATGATTTT	10.9	2.4e-06	-12940	5620		RHE_RS25580																							RHE_RS15665	2	3203861	3204769	D	24300627	-	RHE_RS15665	WP_042118845.1	302	COG1409	T	metallophosphoesterase	3014
RHE_RS22155	R	RHE_RS03000_m3	R	-167	-138	AAATTATCTGATTGTTTTAATTATAATATT	10.0	5.1e-06	-12186	5292		RHE_RS25585																							RHE_RS15135	2	3091716	3094184	R	24297798	-	RHE_RS15135	WP_011426202.1	822	COG2114	T	HAMP domain-containing protein	2914
RHE_RS03000	D	RHE_RS03000_m4	D	-44	-33	TAAGAGGGATAA	13.2	2.5e-08	-17504	7602		RHE_RS25595																							RHE_RS15070	2	3073946	3074740	R	24300822	-	RHE_RS15070	WP_011426189.1	264	COG2207	K	AraC family transcriptional regulator	2901
RHE_RS27645	D	RHE_RS03000_m4	D	-13	-2	AAAGAGCGATAA	9.4	9.7e-06	-11543	5013		RHE_RS25605																							RHE_RS14920	2	3051257	3051625	R	24298539	-	RHE_RS14920	WP_042119285.1	122	COG0784	T	response regulator	2872
RHE_RS25580	R	RHE_RS03000_m5	R	-146	-126	GTTTGTCCCTCAACTCAGGAG	10.9	2.1e-06	-13074	5678		RHE_RS25640																							RHE_RS14860	2	3042072	3042986	R	24301387	-	RHE_RS14860	WP_011426151.1	304	COG1176	E	ABC transporter permease	2860
RHE_RS25585	D	RHE_RS03000_m5	D	-29	-9	GTTTGTCCCTCAACTCAGGAG	10.9	2.1e-06	-13074	5678		RHE_RS25695																							RHE_RS14150	2	2881565	2882188	D	24298299	-	RHE_RS14150	WP_011426011.1	207	COG1309	K	TetR/AcrR family transcriptional regulator	2722
RHE_RS03040	R	RHE_RS03040_m1	R	-83	-65	CATATACGCGACGTATATC	18.3	1.8e-09	-20135	8745		RHE_RS25720																							RHE_RS14140	2	2879630	2880349	D	24297964	-	RHE_RS14140	WP_011426009.1	239	COG1794	M	aspartate/glutamate racemase family protein	2720
RHE_RS03040	R	RHE_RS03040_m1	R	-35	-17	CGCATACGGGCCGTATATG	16.2	1.3e-08	-18158	7886		RHE_RS25725																							RHE_RS14135	2	2879011	2879475	R	24298124	-	RHE_RS14135	WP_011426008.1	154	COG1522	K	Lrp/AsnC family transcriptional regulator	2719
RHE_RS03045	D	RHE_RS03040_m1	D	-143	-125	CGCATACGGGCCGTATATG	16.2	1.3e-08	-18158	7886		RHE_RS25740																							RHE_RS13775	2	2803413	2804138	D	24297979	-	RHE_RS13775	WP_011425941.1	241	COG1028	IQR	SDR family NAD(P)-dependent oxidoreductase	2651
RHE_RS03045	D	RHE_RS03040_m1	D	-95	-77	CATATACGCGACGTATATC	18.3	1.8e-09	-20135	8745		RHE_RS25775																							RHE_RS13770	2	2802321	2803223	R	24297597	-	RHE_RS13770	WP_011425940.1	300	COG0583	K	LysR family transcriptional regulator	2650
RHE_RS03040	R	RHE_RS03040_m2	R	-84	-64	TCATATACGCGACGTATATCA	20.8	1.3e-10	-22763	9886		RHE_RS25795																							RHE_RS13545	2	2759015	2759521	D	24298247	-	RHE_RS13545	WP_041678685.1	168			hypothetical protein	2606
RHE_RS03040	R	RHE_RS03040_m2	R	-36	-16	TCGCATACGGGCCGTATATGA	18.6	1.2e-09	-20541	8921		RHE_RS25800																							RHE_RS13495	2	2749476	2749919	R	24299254	-	RHE_RS13495	WP_011425886.1	147	COG3832	S	ATPase	2598
RHE_RS03045	D	RHE_RS03040_m2	D	-144	-124	TCGCATACGGGCCGTATATGA	18.6	1.2e-09	-20541	8921		RHE_RS25805																							RHE_RS13300	2	2707288	2708211	D	24298327	-	RHE_RS13300	WP_042119263.1	307	COG5285	Q	dehydrogenase	2562
RHE_RS03045	D	RHE_RS03040_m2	D	-96	-76	TCATATACGCGACGTATATCA	20.8	1.3e-10	-22763	9886		RHE_RS25835																							RHE_RS13295	2	2706372	2707193	R	24300892	-	RHE_RS13295	WP_011425847.1	273	COG2207	K	AraC family transcriptional regulator	2561
RHE_RS03180	D	RHE_RS03040_m2	D	-140	-120	TGATATCCGCCTTGTATACCG	4.4	6.8e-06	-11899	5167		RHE_RS25890																							RHE_RS13275	2	2703060	2703851	D	24298516	-	RHE_RS13275	WP_042118666.1	263	COG0289	E	4-hydroxy-tetrahydrodipicolinate reductase	2558
RHE_RS03040	R	RHE_RS03040_m3	R	-75	-56	GACGTAGTTCATATACGCGA	12.8	3.8e-07	-14783	6420		RHE_RS25905																							RHE_RS12810	2	2617736	2617969	R	24301182	-	RHE_RS12810	WP_011425758.1	77	COG3798	S	DUF2171 domain-containing protein	2473
RHE_RS03040	R	RHE_RS03040_m3	R	-27	-8	CTCCAATTTCGCATACGGGC	10.4	2.4e-06	-12940	5620		RHE_RS25950																							RHE_RS12340	2	2528824	2529582	D	24299328	-	RHE_RS12340	WP_011425673.1	252	COG0596	HR	alpha/beta hydrolase	2383
RHE_RS03045	D	RHE_RS03040_m3	D	-152	-133	CTCCAATTTCGCATACGGGC	10.4	2.4e-06	-12940	5620		RHE_RS25970																							RHE_RS10970	2	2245949	2246791	D	24298156	-	RHE_RS10970	WP_011425410.1	280	COG0834	ET	ABC transporter substrate-binding protein	2120
RHE_RS03045	D	RHE_RS03040_m3	D	-104	-85	GACGTAGTTCATATACGCGA	12.8	3.8e-07	-14783	6420		RHE_RS26000																							RHE_RS10750	2	2197236	2199038	R	24300030	-	RHE_RS10750	WP_011425367.1	600	COG4166	E	ABC transporter substrate-binding protein	2075
RHE_RS03950	D	RHE_RS03040_m3	D	-31	-12	GTCGAAAGTCACATAAGGGA	10.9	1.8e-06	-13228	5745		RHE_RS26015																							RHE_RS10490	2	2140347	2141144	R	24299915	-	RHE_RS10490	WP_011425316.1	265	COG1402	HQ	creatininase	2023
RHE_RS09265	D	RHE_RS03040_m3	D	-381	-362	AAGTTATTTCAAAGACGCGC	9.6	4.4e-06	-12334	5357		RHE_RS26040																							RHE_RS10485	2	2139378	2140328	D	24299247	-	RHE_RS10485	WP_011425315.1	316	COG0583	K	MULTISPECIES: LysR family transcriptional regulator	2022
RHE_RS03040	R	RHE_RS03040_m4	R	-84	-73	CGACGTATATCA	10.8	4.2e-06	-12380	5377		RHE_RS26070																							RHE_RS09750	2	1990972	1992162	R	24300625	-	RHE_RS09750	WP_011425189.1	396	COG3146	R	GNAT family N-acetyltransferase	1876
RHE_RS03045	D	RHE_RS03040_m4	D	-87	-76	CGACGTATATCA	10.8	4.2e-06	-12380	5377		RHE_RS26100																							RHE_RS09465	2	1940352	1941056	D	24299853	-	RHE_RS09465	WP_011425141.1	234	COG2220	G	metal-dependent hydrolase	1825
RHE_RS27455	R	RHE_RS03040_m4	R	-155	-144	GAGCGTATATGA	11.3	2.8e-06	-12786	5553		RHE_RS26110																							RHE_RS09235	2	1891284	1891622	R	24300606	-	RHE_RS09235	WP_011425098.1	112			KTSC domain-containing protein	1780
RHE_RS30305	R	RHE_RS03040_m4	R	-141	-130	TGGCGTATGTCA	12.0	1.3e-06	-13553	5886		RHE_RS26115																							RHE_RS08895	2	1822493	1823074	D	24300187	-	RHE_RS08895	WP_011425031.1	193			BA14K family protein	1713
RHE_RS30310	D	RHE_RS03040_m4	D	-117	-106	TGGCGTATGTCA	12.0	1.3e-06	-13553	5886		RHE_RS26150																							RHE_RS08770	2	1795568	1796611	D	24300481	-	RHE_RS08770	WP_011425007.1	347	COG0657	I	alpha/beta hydrolase	1690
RHE_RS03040	R	RHE_RS03040_m5	R	-84	-66	ATATACGCGACGTATATCA	19.4	5.1e-10	-21397	9292		RHE_RS26195																							RHE_RS08350	2	1716074	1716445	D	24298451	-	RHE_RS08350	WP_003547430.1	123	COG0784	T	MULTISPECIES: response regulator	1610
RHE_RS03040	R	RHE_RS03040_m5	R	-36	-18	GCATACGGGCCGTATATGA	17.2	4.8e-09	-19155	8319		RHE_RS26235																							RHE_RS08145	2	1675924	1678122	D	24301382	-	RHE_RS08145	WP_011424916.1	732	COG4222	S	alkaline phosphatase	1572
RHE_RS03045	D	RHE_RS03040_m5	D	-142	-124	GCATACGGGCCGTATATGA	17.2	4.8e-09	-19155	8319		RHE_RS26275																							RHE_RS07145	2	1473808	1474323	D	24299267	-	RHE_RS07145	WP_011424735.1	171	COG2032	P	superoxide dismutase family protein	1378
RHE_RS03045	D	RHE_RS03040_m5	D	-94	-76	ATATACGCGACGTATATCA	19.4	5.1e-10	-21397	9292		RHE_RS26280																							RHE_RS06730	2	1373801	1375168	D	24298748	-	RHE_RS06730	WP_011424655.1	455	COG0161	H	aspartate aminotransferase family protein	1294
RHE_RS00690	R	RHE_RS03175_m1	R	-397	-384	AGTATTTCTAGATT	9.4	7.6e-06	-11787	5119		RHE_RS26295																							RHE_RS06620	2	1341246	1341992	D	24298453	-	RHE_RS06620	WP_041678849.1	248	COG0745	TK	DNA-binding response regulator	1272
RHE_RS03170	R	RHE_RS03175_m1	R	-108	-95	ATGATTTTTCGATC	11.4	2.3e-06	-12983	5638		RHE_RS26330																							RHE_RS06580	2	1332690	1333361	D	24301574	-	RHE_RS06580	WP_011424625.1	223	COG0745	TK	DNA-binding response regulator	1264
RHE_RS03175	D	RHE_RS03175_m1	D	-104	-91	ATGATTTTTCGATC	11.4	2.3e-06	-12983	5638		RHE_RS26350																							RHE_RS06380	2	1299200	1299709	D	24301363	-	RHE_RS06380	WP_011424584.1	169	COG0071	O	Hsp20/alpha crystallin family protein	1225
RHE_RS10400	D	RHE_RS03175_m1	D	-130	-117	ACTATTCTGCGATT	9.8	5.8e-06	-12058	5237		RHE_RS26355																							RHE_RS06290	2	1283319	1283708	D	24298893	-	RHE_RS06290	WP_011424566.1	129			DUF930 domain-containing protein	1207
RHE_RS25595	D	RHE_RS03175_m1	D	-54	-41	ACGATTTATCGATA	9.2	9.2e-06	-11596	5036		RHE_RS26495																							RHE_RS06105	2	1244328	1245227	R	24299707	-	RHE_RS06105	WP_011424530.1	299	COG0583	K	LysR family transcriptional regulator	1170
RHE_RS03170	R	RHE_RS03175_m2	R	-50	-29	GCCATTTTTTCCGAAATCGAGG	15.9	2.1e-08	-17679	7678		RHE_RS26515																							RHE_RS06030	2	1227343	1228071	D	24299351	-	RHE_RS06030	WP_020920728.1	242	COG4312	R	DUF899 domain-containing protein	1154
RHE_RS03175	D	RHE_RS03175_m2	D	-170	-149	GCCATTTTTTCCGAAATCGAGG	15.9	2.1e-08	-17679	7678		RHE_RS26605																							RHE_RS06025	2	1226740	1227255	R	24299352	-	RHE_RS06025	WP_011424514.1	171	COG1846	K	MarR family transcriptional regulator	1153
RHE_RS20580	D	RHE_RS03175_m2	D	-248	-227	GCTATTCCGTCAATGTTCGATG	9.1	2.1e-06	-13074	5678		RHE_RS26635																							RHE_RS05750	2	1176195	1177085	D	24297977	-	RHE_RS05750	WP_073990369.1	296	COG0583	K	LysR family transcriptional regulator	1102
RHE_RS23915	R	RHE_RS03175_m2	R	-138	-117	GGCATGTTTCAATAGATCGAGC	6.6	7.8e-06	-11761	5108		RHE_RS26640																							RHE_RS05425	2	1113786	1114412	D	24300571	-	RHE_RS05425	WP_011424406.1	208			class I SAM-dependent methyltransferase	1041
RHE_RS23920	D	RHE_RS03175_m2	D	-171	-150	GGCATGTTTCAATAGATCGAGC	6.6	7.8e-06	-11761	5108		RHE_RS26680																							RHE_RS05140	2	1063509	1064417	R	24299832	-	RHE_RS05140	WP_042119185.1	302	COG0491	R	MBL fold metallo-hydrolase	988
RHE_RS26790	D	RHE_RS03175_m2	D	-46	-25	ACGTTTCCAGTATAAATCGATA	6.8	7.1e-06	-11855	5149		RHE_RS26695																							RHE_RS04985	2	1035014	1035727	R	24301489	-	RHE_RS04985	WP_011424332.1	237	COG2863	C	cytochrome c	956
RHE_RS03170	R	RHE_RS03175_m3	R	-134	-119	AATTTTCGTAAAATCG	10.9	2.9e-06	-12751	5538		RHE_RS26720																							RHE_RS04490	2	936539	937798	D	24300094	-	RHE_RS04490	WP_011424240.1	419	COG2230	I	class I SAM-dependent methyltransferase	860
RHE_RS03170	R	RHE_RS03175_m3	R	-98	-83	GCTTTTTCCGAAATGA	10.6	4.4e-06	-12334	5357		RHE_RS26750																							RHE_RS04115	2	855055	855759	R	24301255	-	RHE_RS04115	WP_011424167.1	234	COG1011	H	haloacid dehalogenase	786
RHE_RS03170	R	RHE_RS03175_m3	R	-47	-32	ATTTTTTCCGAAATCG	10.1	8.3e-06	-11699	5081		RHE_RS26765																							RHE_RS04010	2	834800	835717	R	24299065	-	RHE_RS04010	WP_042117962.1	305	COG0583	K	LysR family transcriptional regulator	765
RHE_RS03175	D	RHE_RS03175_m3	D	-167	-152	ATTTTTTCCGAAATCG	10.1	8.3e-06	-11699	5081		RHE_RS26790																							RHE_RS03915	2	812948	813295	R	24298377	-	RHE_RS03915	WP_011424133.1	115	COG3436	X	IS66 family insertion sequence hypothetical protein	748
RHE_RS03175	D	RHE_RS03175_m3	D	-116	-101	GCTTTTTCCGAAATGA	10.6	4.4e-06	-12334	5357		RHE_RS26795																							RHE_RS03750	2	778860	779399	D	24299336	-	RHE_RS03750	WP_011424100.1	179	COG3265	G	gluconokinase	716
RHE_RS03175	D	RHE_RS03175_m3	D	-80	-65	AATTTTCGTAAAATCG	10.9	2.9e-06	-12751	5538		RHE_RS26800																							RHE_RS03595	2	735365	736234	D	24299199	-	RHE_RS03595	WP_042117916.1	289	COG0583	K	LysR family transcriptional regulator	689
RHE_RS07110	D	RHE_RS03175_m3	D	-70	-55	GCATTTTGGAAAATAA	10.2	7.3e-06	-11828	5137		RHE_RS26840																							RHE_RS03575	2	728671	729867	D	24297532	-	RHE_RS03575	WP_042117912.1	398	COG2081	R	NAD(P)/FAD-dependent oxidoreductase	685
RHE_RS09090	R	RHE_RS03175_m3	R	-88	-73	TGTTTTCCGAAAAACC	11.3	1.8e-06	-13228	5745		RHE_RS26860																							RHE_RS03330	2	679032	679424	D	24300746	flgB	RHE_RS03330	WP_011424023.1	130	COG1815	N	MULTISPECIES: flagellar biosynthesis protein FlgB	636
RHE_RS14295	R	RHE_RS03175_m3	R	-90	-75	CCTTTTCGCGAAATCC	11.0	2.5e-06	-12899	5602		RHE_RS26870																							RHE_RS02710	2	554463	555134	R	24301630	-	RHE_RS02710	WP_011423907.1	223	COG2932	X	helix-turn-helix transcriptional regulator	515
RHE_RS20580	D	RHE_RS03175_m3	D	-367	-352	CTTTTTCCTAAAAAAA	10.8	3.3e-06	-12622	5481		RHE_RS26875																							RHE_RS02645	2	541160	542251	D	24298802	-	RHE_RS02645	WP_011423896.1	363	COG0717	F	2\'-deoxycytidine 5\'-triphosphate deaminase	504
RHE_RS26875	R	RHE_RS03175_m3	R	-73	-58	TCTTTTCCAAAAAAAG	10.3	6.4e-06	-11959	5194		RHE_RS27050																							RHE_RS02640	2	539777	540961	R	24297668	-	RHE_RS02640	WP_011423894.1	394	COG0626	E	O-succinylhomoserine sulfhydrylase	503
RHE_RS28160	R	RHE_RS03175_m3	R	-27	-12	TCTTTTCGGGAATTAA	10.2	7.3e-06	-11828	5137		RHE_RS27075																							RHE_RS02140	2	436645	438174	D	24297855	bchE	RHE_RS02140	WP_011423803.1	509	COG1032	R	magnesium-protoporphyrin IX monomethyl ester anaerobic oxidative cyclase	409
RHE_RS28165	D	RHE_RS03175_m3	D	-307	-292	TCTTTTCGGGAATTAA	10.2	7.3e-06	-11828	5137		RHE_RS27165																							RHE_RS02135	2	435743	436459	R	24297971	-	RHE_RS02135	WP_011423802.1	238	COG1011	H	pyrimidine 5\'-nucleotidase	408
RHE_RS29845	D	RHE_RS03175_m3	D	-308	-293	GATTTTCCGAAAATTG	10.0	9.1e-06	-11607	5041		RHE_RS27170																							RHE_RS01775	2	361765	363144	R	24298776	-	RHE_RS01775	WP_011423735.1	459	COG0044	F	allantoinase	336
RHE_RS03170	R	RHE_RS03175_m4	R	-154	-136	GATATCGTGACGTCGAAGG	17.2	6.3e-09	-18883	8201		RHE_RS27180																							RHE_RS01340	2	277072	277431	R	24301228	-	RHE_RS01340	WP_011423650.1	119			MULTISPECIES: nuclear transport factor 2 family protein	254
RHE_RS03175	D	RHE_RS03175_m4	D	-63	-45	GATATCGTGACGTCGAAGG	17.2	6.3e-09	-18883	8201		RHE_RS27185																							RHE_RS00815	2	176162	177010	R	24300186	phnC	RHE_RS00815	WP_082239827.1	282	COG3638	P	phosphonate ABC transporter ATP-binding protein	153
RHE_RS09210	D	RHE_RS03175_m4	D	-203	-185	AATATCGCGAGAACGAAGC	6.5	4.2e-06	-12380	5377		RHE_RS27195																							RHE_RS00490	2	106148	107665	D	24300853	-	RHE_RS00490	WP_011423493.1	505			hypothetical protein	89
RHE_RS12975	R	RHE_RS03175_m4	R	-153	-135	GGTATCGAGACGTTGCAGC	7.0	3.1e-06	-12684	5509		RHE_RS27240																							RHE_RS33160	1	337687	338447	R	31930231	-	RHE_RS33160	WP_086005067.1	253	COG3293	X	IS5-like element ISRel13 family transposase	5967
RHE_RS26015	R	RHE_RS03175_m4	R	-204	-186	GCTATTGTCCCATGGAAAG	5.1	7.7e-06	-11774	5114		RHE_RS27280																							RHE_RS31500	1	1259117	1259404	R	30584452	-	RHE_RS31500	WP_011424546.1	95			MurR/RpiR family transcriptional regulator	1186
RHE_RS27075	R	RHE_RS03175_m4	R	-311	-293	GATATCGCTTTGATGAAGC	7.4	2.5e-06	-12899	5602		RHE_RS27305																							RHE_RS31100	1	353386	354564	R	24297162	-	RHE_RS31100	WP_011053494.1	392	COG3594	G	MULTISPECIES: nodulation protein NolL	5979
RHE_RS13955	R	RHE_RS03175_m5	R	-35	-21	TGCGTCACCCCTCCC	11.5	9.6e-07	-13856	6018		RHE_RS27310																							RHE_RS30740	1	284542	285081	R	24297396	-	RHE_RS30740	WP_004679185.1	179			MULTISPECIES: hypothetical protein	5911
RHE_RS25335	R	RHE_RS03175_m5	R	-114	-100	GGCGCGGCTCCTCCC	10.5	3.0e-06	-12717	5523		RHE_RS27315																							RHE_RS30475	1	233326	233865	D	24297238	-	RHE_RS30475	WP_004678566.1	179	COG0678	O	MULTISPECIES: peroxiredoxin	5863
RHE_RS00690	R	RHE_RS03180_m1	R	-399	-384	AGTATTTCTAGATTTC	9.1	5.4e-06	-12129	5268		RHE_RS27360																							RHE_RS29575	1	33244	33528	R	24297441	-	RHE_RS29575	WP_004674373.1	94			MULTISPECIES: carbon monoxide dehydrogenase	5694
RHE_RS03180	D	RHE_RS03180_m1	D	-398	-383	TGCATTTCAAGATGCA	11.7	8.3e-07	-14002	6081		RHE_RS27415																							RHE_RS29400	1	635310	636548	D	24302763	-	RHE_RS29400	WP_011428870.1	412	COG1846	K	ROK family transcriptional regulator	5660
RHE_RS03180	D	RHE_RS03180_m1	D	-52	-37	TATATCCCAAGATTTC	17.5	1.5e-09	-20318	8824		RHE_RS27455																							RHE_RS29270	1	610533	611819	D	24302789	-	RHE_RS29270	WP_011428849.1	428	COG0596	HR	multidrug MFS transporter	5634
RHE_RS10220	D	RHE_RS03180_m1	D	-208	-193	CACATCCCAAGATGGC	9.7	3.6e-06	-12535	5444		RHE_RS27460																							RHE_RS29265	1	609618	610286	D	24302790	-	RHE_RS29265	WP_011428848.1	222	COG0346	Q	glyoxalase	5633
RHE_RS24195	R	RHE_RS03180_m1	R	-180	-165	TATATCACAGGATTTT	10.3	2.5e-06	-12899	5602		RHE_RS27465																							RHE_RS28840	1	523112	523942	D	24302875	-	RHE_RS28840	WP_011428769.1	276	COG0614	P	iron-siderophore ABC transporter substrate-binding protein	5552
RHE_RS29200	R	RHE_RS03180_m1	R	-114	-99	TATATTTCAGGATATT	8.2	9.6e-06	-11554	5018		RHE_RS27525																							RHE_RS28725	1	493583	493927	D	24302898	-	RHE_RS28725	WP_011428746.1	114			transcriptional regulator	5529
RHE_RS29205	D	RHE_RS03180_m1	D	-147	-132	TATATTTCAGGATATT	8.2	9.6e-06	-11554	5018		RHE_RS27570																							RHE_RS28720	1	492770	493408	R	24302899	-	RHE_RS28720	WP_011428745.1	212	COG3916	T	acyl-homoserine-lactone synthase	5528
RHE_RS03180	D	RHE_RS03180_m2	D	-348	-333	CTGAGAGAACCGATTG	13.1	3.4e-07	-14894	6469		RHE_RS27580																							RHE_RS28625	1	475398	476108	D	24302918	-	RHE_RS28625	WP_011428727.1	236	COG1595	K	RNA polymerase sigma factor	5511
RHE_RS03180	D	RHE_RS03180_m2	D	-153	-138	TTGAGATAATTGATGA	12.3	7.8e-07	-14064	6108		RHE_RS27605																							RHE_RS28190	1	378653	380116	D	24303005	-	RHE_RS28190	WP_011428645.1	487	COG1012	C	aldehyde dehydrogenase	5425
RHE_RS03180	D	RHE_RS03180_m3	D	-390	-369	AAGATGCAACCGAAGCGAAAAG	17.1	4.9e-09	-19134	8310		RHE_RS27645																							RHE_RS28170	1	374848	375750	R	24303009	-	RHE_RS28170	WP_011428641.1	300	COG0454	KR	N-acetyltransferase	5421
RHE_RS03180	D	RHE_RS03180_m3	D	-235	-214	TGGATGTTGAATGCGAGAAGAT	17.0	5.4e-09	-19037	8268		RHE_RS27715																							RHE_RS27730	1	269623	270132	R	24303097	-	RHE_RS27730	WP_011428559.1	169			hypothetical protein	5333
RHE_RS03180	D	RHE_RS03180_m4	D	-392	-371	TCAAGATGCAACCGAAGCGAAA	17.6	3.2e-09	-19560	8495		RHE_RS27730																							RHE_RS26860	1	85696	86193	R	24303271	-	RHE_RS26860	WP_011428394.1	165	COG4186	R	hydrolase	5161
RHE_RS03180	D	RHE_RS03180_m4	D	-355	-334	ATAAGCGCTGAGAGAACCGATT	20.2	1.0e-10	-23026	10000		RHE_RS27750																							RHE_RS26840	1	83866	84222	D	24303275	-	RHE_RS26840	WP_011428390.1	118	COG0784	T	MULTISPECIES: response regulator	5157
RHE_RS18795	D	RHE_RS03180_m4	D	-210	-189	AGAAGATGTAGGAAAGGCGAAT	7.8	4.1e-06	-12405	5387		RHE_RS27815																							RHE_RS26800	1	73942	74334	D	24303283	-	RHE_RS26800	WP_011428384.1	130	COG0784	T	response regulator	5149
RHE_RS23915	R	RHE_RS03180_m4	R	-76	-55	ACAAGCAGCGTTCGAAGCGAAC	9.2	1.7e-06	-13285	5770		RHE_RS27845																							RHE_RS26515	1	18139	19422	R	24303340	-	RHE_RS26515	WP_011428331.1	427	COG0626	E	methionine gamma-lyase	5093
RHE_RS23920	D	RHE_RS03180_m4	D	-233	-212	ACAAGCAGCGTTCGAAGCGAAC	9.2	1.7e-06	-13285	5770		RHE_RS27880																							RHE_RS26330	1	487800	488696	R	24302297	-	RHE_RS26330	WP_020923246.1	298	COG4111	S	nicotinic acid mononucleotide biosynthesis protein	5057
RHE_RS25970	R	RHE_RS03180_m4	R	-106	-85	TTGAGTGGCAATAAAACCGATG	6.2	9.0e-06	-11618	5046		RHE_RS27920																							RHE_RS26110	1	439479	440252	D	24302341	-	RHE_RS26110	WP_011428250.1	257			hypothetical protein	5011
RHE_RS29835	R	RHE_RS03180_m5	R	-169	-154	GGATCTTGAGGTGCTC	9.9	4.4e-06	-12334	5357		RHE_RS27930																							RHE_RS26100	1	435399	435887	D	24302343	-	RHE_RS26100	WP_011428248.1	162	COG4297	S	hypothetical protein	5009
RHE_RS03210	D	RHE_RS03210_m1	D	-23	-10	ACTGGAGATCCCGT	10.3	2.9e-06	-12751	5538		RHE_RS27935																							RHE_RS26040	1	422939	423802	D	24302355	-	RHE_RS26040	WP_042119901.1	287	COG1737	K	MULTISPECIES: MurR/RpiR family transcriptional regulator	4998
RHE_RS05855	R	RHE_RS03210_m1	R	-94	-81	TCAGGAAATCCCGC	11.6	1.7e-06	-13285	5770		RHE_RS27975																							RHE_RS25950	1	408573	409457	D	24302373	-	RHE_RS25950	WP_011428222.1	294	COG1175	G	MULTISPECIES: sugar ABC transporter permease	4981
RHE_RS11860	R	RHE_RS03210_m1	R	-170	-157	ACAGGAAATCCAGC	12.7	8.5e-07	-13978	6071		RHE_RS28010																							RHE_RS25740	1	363049	363726	R	24302415	-	RHE_RS25740	WP_011428181.1	225	COG4262	R	spermidine synthase	4939
RHE_RS18365	D	RHE_RS03210_m1	D	-28	-15	ACAGGGTTTCCAGT	8.9	7.5e-06	-11801	5125		RHE_RS28020																							RHE_RS25725	1	360991	361899	D	24302418	-	RHE_RS25725	WP_042119897.1	302	COG0583	K	LysR family transcriptional regulator	4936
RHE_RS06280	R	RHE_RS03210_m2	R	-71	-53	TCTCCAGGTGGGGAGATGC	8.9	1.2e-06	-13633	5921		RHE_RS28160																							RHE_RS25720	1	359381	360895	R	24302419	betC	RHE_RS25720	WP_011428178.1	504	COG3119	P	choline-sulfatase	4935
RHE_RS06955	R	RHE_RS03210_m2	R	-183	-165	ATTTCAAATTGGAAGATAA	5.5	8.1e-06	-11724	5092		RHE_RS28165																							RHE_RS25640	1	344825	346426	D	24302435	-	RHE_RS25640	WP_011428162.1	533	COG4961	UW	hypothetical protein	4919
RHE_RS03210	D	RHE_RS03210_m3	D	-24	-10	AACTGGAGATCCCGT	12.9	2.4e-07	-15243	6620		RHE_RS28170																							RHE_RS25025	1	224756	225760	R	24302558	-	RHE_RS25025	WP_042119874.1	334	COG0601	EP	MULTISPECIES: ABC transporter permease	4801
RHE_RS05855	R	RHE_RS03210_m3	R	-94	-80	TTCAGGAAATCCCGC	9.2	4.3e-06	-12357	5367		RHE_RS28190																							RHE_RS24850	1	188188	189024	D	24302593	-	RHE_RS24850	WP_011428015.1	278	COG1917	R	AraC family transcriptional regulator	4768
RHE_RS01740	D	RHE_RS03210_m4	D	-44	-23	TAGTCTCCAGATCGGGGAATTC	9.3	5.8e-07	-14360	6237		RHE_RS28305																							RHE_RS24735	1	166543	166890	D	24302616	-	RHE_RS24735	WP_011427995.1	115	COG0640	K	ArsR family transcriptional regulator	4747
RHE_RS03210	D	RHE_RS03210_m4	D	-34	-13	CTGTCTCCCGAACTGGAGATCC	19.3	5.9e-10	-21251	9229		RHE_RS28340																							RHE_RS24360	1	78900	79298	D	24302691	-	RHE_RS24360	WP_011427924.1	132			DoxX family protein	4671
RHE_RS06280	R	RHE_RS03210_m4	R	-71	-50	GCATCTCCAGGTGGGGAGATGC	9.6	4.9e-07	-14529	6310		RHE_RS28370																							RHE_RS24290	1	67719	68093	R	24302705	-	RHE_RS24290	WP_011427911.1	124	COG3791	S	GFA family protein	4656
RHE_RS22620	R	RHE_RS03210_m4	R	-29	-8	GGGTCTCCAATTCTGTAAACAA	5.0	5.2e-06	-12167	5284		RHE_RS28380																							RHE_RS24140	1	31787	33724	D	24302735	-	RHE_RS24140	WP_011427883.1	645	COG0784	T	PAS domain-containing sensor histidine kinase	4627
RHE_RS06280	R	RHE_RS03210_m5	R	-70	-48	GGGCATCTCCAGGTGGGGAGATG	5.7	2.6e-06	-12860	5585		RHE_RS28450																							RHE_RS23890	1	220402	220881	R	24302071	-	RHE_RS23890	WP_041678968.1	159	COG3871	S	MULTISPECIES: general stress protein	4579
RHE_RS18365	D	RHE_RS03210_m5	D	-27	-5	CAGGGTTTCCAGTTGGGTGAACA	3.4	8.2e-06	-11711	5086		RHE_RS28510																							RHE_RS23865	1	215290	216942	D	24302076	-	RHE_RS23865	WP_011427828.1	550	COG2303	IR	GMC family oxidoreductase	4574
RHE_RS03275	D	RHE_RS03275_m1	D	-106	-87	TGGGTGATTCGAATTGGGAT	11.7	1.2e-06	-13633	5921		RHE_RS28555																							RHE_RS23350	1	106295	107344	R	24302179	-	RHE_RS23350	WP_042119731.1	349	COG1609	K	LacI family transcriptional regulator	4473
RHE_RS03275	D	RHE_RS03275_m2	D	-106	-91	TGGGTGATTCGAATTG	12.1	4.6e-07	-14592	6337		RHE_RS28605																							RHE_RS23325	1	102240	102866	D	24302184	-	RHE_RS23325	WP_011427722.1	208	COG4566	TK	DNA-binding response regulator	4469
RHE_RS14410	R	RHE_RS03275_m2	R	-273	-258	CCCGTGATTCGAGCCG	10.1	6.6e-06	-11928	5180		RHE_RS28625																							RHE_RS23180	1	65986	67062	R	24302213	-	RHE_RS23180	WP_011427693.1	358	COG2207	K	AraC family transcriptional regulator	4437
RHE_RS10680	D	RHE_RS03275_m3	D	-74	-63	AGCGATTTACAA	9.9	6.1e-06	-12007	5215		RHE_RS28695																							RHE_RS22830	1	179736	180188	D	24301876	-	RHE_RS22830	WP_042119690.1	150	COG1396	K	transcriptional regulator	4370
RHE_RS12090	D	RHE_RS03275_m3	D	-150	-139	ACGGATTTACCT	10.4	3.9e-06	-12455	5409		RHE_RS28710																							RHE_RS22705	1	153191	154492	R	24301901	-	RHE_RS22705	WP_011427602.1	433	COG1175	G	sugar ABC transporter permease	4346
RHE_RS03275	D	RHE_RS03275_m4	D	-148	-131	CTAGAAGTCGGAGATGGT	22.3	5.1e-12	-26002	11292		RHE_RS28720																							RHE_RS22640	1	140103	141500	D	24301914	-	RHE_RS22640	WP_011427589.1	465	COG2141	HR	FMN-dependent monooxygenase	4333
RHE_RS12060	R	RHE_RS03275_m4	R	-150	-133	CTAGAATCCGCAAATGGA	8.6	5.8e-06	-12058	5237		RHE_RS28725																							RHE_RS22560	1	121960	122838	D	24301930	-	RHE_RS22560	WP_011427573.1	292	COG2267	I	alpha/beta hydrolase	4317
RHE_RS12065	D	RHE_RS03275_m4	D	-50	-33	CTAGAATCCGCAAATGGA	8.6	5.8e-06	-12058	5237		RHE_RS28730																							RHE_RS22245	1	51788	52594	R	24301993	-	RHE_RS22245	WP_011427514.1	268			hypothetical protein	4259
RHE_RS14870	R	RHE_RS03275_m4	R	-243	-226	CGCGAAGCCGGGTATGGT	7.9	9.0e-06	-11618	5046		RHE_RS28840																							RHE_RS22190	1	41536	42300	D	24302004	-	RHE_RS22190	WP_011427504.1	254	COG2186	K	MULTISPECIES: FadR family transcriptional regulator	4248
RHE_RS14875	D	RHE_RS03275_m4	D	-46	-29	CGCGAAGCCGGGTATGGT	7.9	9.0e-06	-11618	5046		RHE_RS28870																							RHE_RS22045	1	11124	11993	R	24302033	-	RHE_RS22045	WP_011427476.1	289	COG2017	G	aldose 1-epimerase family protein	4220
RHE_RS22260	R	RHE_RS03275_m4	R	-83	-66	AAAGAAGTCATAGATGAT	10.6	1.6e-06	-13346	5796		RHE_RS28880																							RHE_RS21390	1	64327	64524	D	24301814	-	RHE_RS21390	WP_011427363.1	65			MULTISPECIES: type VI secretion protein	4114
RHE_RS03275	D	RHE_RS03275_m5	D	-331	-314	CGCGGGAGTCGAATGGGG	11.1	2.3e-06	-12983	5638		RHE_RS28890																							RHE_RS20905	1	4333010	4333429	D	24299017	-	RHE_RS20905	WP_011427271.1	139	COG2764	R	VOC family protein	4031
RHE_RS03275	D	RHE_RS03275_m5	D	-106	-89	TGGGTGATTCGAATTGGG	14.6	1.0e-08	-18421	8000		RHE_RS28895																							RHE_RS20850	1	4322219	4323415	D	24299409	-	RHE_RS20850	WP_042119122.1	398	COG2861	G	divergent polysaccharide deacetylase family protein	4022
RHE_RS03430	D	RHE_RS03430_m2	D	-128	-102	ATCAAATCGCCGGGCGAGTCTTAATCA	12.4	5.2e-07	-14469	6284		RHE_RS28900																							RHE_RS20825	1	4317621	4317998	R	24299475	-	RHE_RS20825	WP_011427257.1	125	COG2005	K	LysR family transcriptional regulator	4017
RHE_RS04645	D	RHE_RS03430_m2	D	-106	-80	ACGAAATAGAGGAGATGTCGTTAATTC	10.0	3.9e-06	-12455	5409		RHE_RS29075																							RHE_RS19830	1	4108381	4109313	D	24300005	-	RHE_RS19830	WP_011427071.1	310	COG0329	EM	dihydrodipicolinate synthase family protein	3817
RHE_RS06635	R	RHE_RS03430_m2	R	-119	-93	GGTAAAAATCCGTTAACTATTTATATT	9.6	5.4e-06	-12129	5268		RHE_RS29165																							RHE_RS19360	1	4013381	4014304	R	24301205	-	RHE_RS19360	WP_011426987.1	307	COG1295	S	YihY/virulence factor BrkB family protein	3725
RHE_RS03430	D	RHE_RS03430_m3	D	-104	-89	TCAATTATTAATTTCC	11.6	1.1e-06	-13720	5959		RHE_RS29175																							RHE_RS19100	1	3959306	3959671	D	24300371	-	RHE_RS19100	WP_004675794.1	121	COG0838	C	MULTISPECIES: NADH-quinone oxidoreductase subunit A	3680
RHE_RS03430	D	RHE_RS03430_m4	D	-187	-176	CTCGTTAACTTT	9.9	9.8e-06	-11533	5009		RHE_RS29190																							RHE_RS18835	1	3899120	3900073	R	24300884	-	RHE_RS18835	WP_011426895.1	317	COG2390	K	sugar-binding transcriptional regulator	3628
RHE_RS06055	R	RHE_RS03430_m4	R	-180	-169	GACGTTAACGTC	10.6	4.1e-06	-12405	5387		RHE_RS29195																							RHE_RS18765	1	3885767	3886639	R	24301153	-	RHE_RS18765	WP_011426882.1	290	COG0350	L	6-O-methylguanine DNA methyltransferase	3614
RHE_RS17050	D	RHE_RS03430_m4	D	-203	-192	AAAGTTAACGTT	10.3	6.0e-06	-12024	5222		RHE_RS29200																							RHE_RS18685	1	3869325	3870161	D	24298132	-	RHE_RS18685	WP_011426867.1	278	COG2207	K	AraC family transcriptional regulator	3598
RHE_RS29845	D	RHE_RS03430_m4	D	-68	-57	GTCGTTAACTAC	11.1	2.1e-06	-13074	5678		RHE_RS29205																							RHE_RS18175	1	3746004	3747038	D	24300213	-	RHE_RS18175	WP_011426774.1	344	COG0276	H	ferrochelatase	3497
RHE_RS03430	D	RHE_RS03430_m5	D	-105	-86	ATCAATTATTAATTTCCGCC	16.5	2.6e-09	-19768	8585		RHE_RS29240																							RHE_RS18035	1	3719211	3719471	D	24301547	-	RHE_RS18035	WP_011426750.1	86	COG0640	K	ArsR family transcriptional regulator	3469
RHE_RS12760	D	RHE_RS03430_m5	D	-344	-325	CGCAAACGTTAATTTTTGAC	12.7	3.4e-07	-14894	6469		RHE_RS29255																							RHE_RS17940	1	3697787	3698125	D	24300073	-	RHE_RS17940	WP_011426731.1	112	COG3795	S	MULTISPECIES: hypothetical protein	3450
RHE_RS02680	R	RHE_RS03515_m1	R	-239	-220	GCGTCAAAGCGCTCTGACGA	4.5	6.4e-06	-11959	5194		RHE_RS29265																							RHE_RS17320	1	3559792	3560736	D	24301014	-	RHE_RS17320	WP_042119318.1	314	COG1216	G	glycosyl transferase	3335
RHE_RS03515	R	RHE_RS03515_m1	R	-246	-227	GTGTCAAAGCGCTTTGAAAT	18.7	1.3e-09	-20461	8886		RHE_RS29270																							RHE_RS17240	1	3541677	3543032	R	24297635	-	RHE_RS17240	WP_011426604.1	451	COG1653	G	sn-glycerol 3-phosphate ABC transporter	3319
RHE_RS03515	R	RHE_RS03515_m1	R	-83	-64	CGCTCAAAGCGCTTTTAATT	15.6	2.3e-08	-17588	7638		RHE_RS29335																							RHE_RS17040	1	3496756	3497034	D	24301018	-	RHE_RS17040	WP_041678741.1	92	COG2388	R	N-acetyltransferase	3279
RHE_RS25905	R	RHE_RS03515_m1	R	-205	-186	GTTCCAAAGCACTTTCAACG	7.8	1.6e-06	-13346	5796		RHE_RS29390																							RHE_RS16800	1	3447193	3448194	R	24299517	-	RHE_RS16800	WP_042118941.1	333	COG4977	K	transcriptional regulator FtrA	3232
RHE_RS02165	D	RHE_RS03515_m2	D	-158	-147	ACTCCTCCCCTC	9.9	9.4e-06	-11575	5027		RHE_RS29400																							RHE_RS16785	1	3444334	3444768	R	24299777	-	RHE_RS16785	WP_011426514.1	144			hypothetical protein	3230
RHE_RS12975	R	RHE_RS03515_m2	R	-16	-5	CTTCCTCCCGTA	10.8	3.8e-06	-12481	5420		RHE_RS29445																							RHE_RS16210	1	3325799	3326254	D	24299725	-	RHE_RS16210	WP_011426403.1	151			hypothetical protein	3119
RHE_RS16435	D	RHE_RS03515_m2	D	-199	-188	CGTCCTCCCCAC	10.4	5.8e-06	-12058	5237		RHE_RS29535																							RHE_RS15395	1	3150299	3151675	R	24301651	-	RHE_RS15395	WP_011426250.1	458	COG2205	T	MULTISPECIES: HAMP domain-containing protein	2963
RHE_RS17595	R	RHE_RS03515_m2	R	-17	-6	CTTCCTCCCGTA	10.8	3.8e-06	-12481	5420		RHE_RS29575																							RHE_RS15050	1	3071379	3071609	R	24301542	-	RHE_RS15050	WP_020921849.1	76			MULTISPECIES: hypothetical protein	2897
RHE_RS24110	R	RHE_RS03515_m2	R	-24	-13	TTTCCTCCCCTA	10.3	6.5e-06	-11944	5187		RHE_RS29615																							RHE_RS14675	1	2999152	3000057	D	24299286	-	RHE_RS14675	WP_011426115.1	301	COG0697	GER	EamA/RhaT family transporter	2823
RHE_RS27525	D	RHE_RS03515_m2	D	-271	-260	TCTCCTCCCAGA	10.6	4.7e-06	-12268	5328		RHE_RS29630																							RHE_RS14575	1	2976336	2977436	R	24299952	-	RHE_RS14575	WP_011426095.1	366	COG0472	M	MULTISPECIES: phospho-N-acetylmuramoyl-pentapeptide-transferase	2803
RHE_RS03515	R	RHE_RS03515_m3	R	-113	-102	TTGACTCAAGAA	11.3	2.9e-06	-12751	5538		RHE_RS29775																							RHE_RS14485	1	2955079	2955570	R	24300366	-	RHE_RS14485	WP_011426077.1	163	COG3045	T	hypothetical protein	2786
RHE_RS32370	R	RHE_RS03515_m3	R	-138	-127	AGGAGTCAAGTT	10.1	8.0e-06	-11736	5097		RHE_RS29780																							RHE_RS14100	1	2868014	2869018	D	24298805	-	RHE_RS14100	WP_011426001.1	334	COG2390	K	sugar-binding transcriptional regulator	2712
RHE_RS16650	D	RHE_RS03515_m4	D	-86	-77	CTTCCAAAGC	11.4	3.5e-06	-12563	5456		RHE_RS29795																							RHE_RS13930	1	2832608	2833519	R	24297857	-	RHE_RS13930	WP_011425968.1	303	COG0384	R	PhzF family phenazine biosynthesis protein	2680
RHE_RS20950	R	RHE_RS03515_m4	R	-271	-262	CTTCCAAAAC	9.9	9.6e-06	-11554	5018		RHE_RS29820																							RHE_RS13810	1	2812602	2813582	D	24297906	-	RHE_RS13810	WP_011425948.1	326	COG0451	M	RNA-binding protein	2658
RHE_RS25180	R	RHE_RS03515_m4	R	-142	-133	CTTCCAAAGC	11.4	3.5e-06	-12563	5456		RHE_RS29825																							RHE_RS13370	1	2725172	2726179	R	24299977	-	RHE_RS13370	WP_011425861.1	335	COG2207	K	AraC family transcriptional regulator	2574
RHE_RS25185	D	RHE_RS03515_m4	D	-38	-29	CTTCCAAAGC	11.4	3.5e-06	-12563	5456		RHE_RS29830																							RHE_RS13180	1	2688116	2688787	R	24300930	-	RHE_RS13180	WP_011425829.1	223	COG0745	TK	DNA-binding response regulator	2542
RHE_RS02680	R	RHE_RS03515_m5	R	-239	-219	AGCGTCAAAGCGCTCTGACGA	5.1	6.0e-06	-12024	5222		RHE_RS29835																							RHE_RS13060	1	2665159	2666082	D	24301044	-	RHE_RS13060	WP_011425806.1	307	COG0583	K	LysR family transcriptional regulator	2518
RHE_RS03515	R	RHE_RS03515_m5	R	-246	-226	GGTGTCAAAGCGCTTTGAAAT	18.9	9.9e-10	-20733	9004		RHE_RS29840																							RHE_RS12940	1	2641578	2641934	D	24297485	-	RHE_RS12940	WP_011425784.1	118	COG0640	K	ArsR family transcriptional regulator	2496
RHE_RS03515	R	RHE_RS03515_m5	R	-83	-63	GCGCTCAAAGCGCTTTTAATT	15.6	2.3e-08	-17588	7638		RHE_RS29845																							RHE_RS12765	1	2612193	2612540	D	24298012	-	RHE_RS12765	WP_011425751.1	115			hypothetical protein	2464
RHE_RS18970	D	RHE_RS03515_m5	D	-84	-64	AAATTTAAAACGTTTTCATTG	5.3	5.5e-06	-12111	5260		RHE_RS29975																							RHE_RS12520	1	2558832	2559767	D	24298668	-	RHE_RS12520	WP_011425705.1	311	COG0583	K	LysR family transcriptional regulator	2416
RHE_RS25905	R	RHE_RS03515_m5	R	-205	-185	AGTTCCAAAGCACTTTCAACG	8.4	1.3e-06	-13553	5886		RHE_RS29990																							RHE_RS12325	1	2524728	2525468	R	24299427	-	RHE_RS12325	WP_011425670.1	246	COG0745	TK	DNA-binding response regulator	2380
RHE_RS03595	D	RHE_RS03595_m1	D	-20	-3	CCGCTATGTTTTTCATCA	19.8	1.4e-10	-22689	9854		RHE_RS30055																							RHE_RS12035	1	2463809	2464102	R	24297700	-	RHE_RS12035	WP_011425615.1	97	COG1737	K	MurR/RpiR family transcriptional regulator	2326
RHE_RS09090	R	RHE_RS03595_m1	R	-29	-12	CTCCTTTGATTTTCATCA	9.2	3.8e-06	-12481	5420		RHE_RS30080																							RHE_RS11690	1	2388570	2388803	D	24298815	-	RHE_RS11690	WP_011425547.1	77	COG0271	T	MULTISPECIES: BolA family transcriptional regulator	2259
RHE_RS14990	R	RHE_RS03595_m1	R	-319	-302	CCACCATATTTTTCAACG	8.1	7.8e-06	-11761	5108		RHE_RS30095																							RHE_RS11625	1	2376114	2376593	R	24297803	-	RHE_RS11625	WP_011425534.1	159	COG5478	P	low affinity iron permease family protein	2246
RHE_RS29630	D	RHE_RS03595_m1	D	-42	-25	GGGCGATCTTTTTCAGTA	8.9	4.6e-06	-12289	5337		RHE_RS30285																							RHE_RS11445	1	2338815	2339081	D	24299503	-	RHE_RS11445	WP_042118520.1	88			hypothetical protein	2211
RHE_RS03595	D	RHE_RS03595_m2	D	-39	-8	TTCATAAACAGAGAAAATCCCGCTATGTTTTT	27.2	3.4e-14	-31012	13469		RHE_RS30305																							RHE_RS11040	1	2263930	2264718	D	24299196	-	RHE_RS11040	WP_011425423.1	262	COG0730	S	sulfite exporter TauE/SafE family protein	2133
RHE_RS04650	R	RHE_RS03595_m2	R	-122	-91	GTGAAAACTGTTAGAATAATTTACATGTTTCA	1.4	7.5e-06	-11801	5125		RHE_RS30310																							RHE_RS10930	1	2235967	2237475	D	24301186	-	RHE_RS10930	WP_011425402.1	502	COG0457	R	tetratricopeptide repeat protein	2112
RHE_RS04655	D	RHE_RS03595_m2	D	-93	-62	GTGAAAACTGTTAGAATAATTTACATGTTTCA	1.4	7.5e-06	-11801	5125		RHE_RS30465																							RHE_RS09410	1	1930427	1930849	D	24298703	-	RHE_RS09410	WP_011425131.1	140	COG3631	R	ketosteroid isomerase	1815
RHE_RS11740	R	RHE_RS03595_m2	R	-97	-66	CTTGAATACGTGAGAAGTCGCTAGATATCTAT	4.7	1.8e-06	-13228	5745		RHE_RS30470																							RHE_RS09165	1	1882501	1883454	D	24300740	-	RHE_RS09165	WP_011425085.1	317	COG0451	M	epimerase	1766
RHE_RS11900	R	RHE_RS03595_m2	R	-44	-13	CTGAAGAACATCTCATCTGGCGGGGTGTATAT	3.1	3.6e-06	-12535	5444		RHE_RS30475																							RHE_RS08975	1	1840285	1841121	R	24300150	-	RHE_RS08975	WP_011425047.1	278	COG0589	T	universal stress protein	1729
RHE_RS11905	D	RHE_RS03595_m2	D	-267	-236	CTGAAGAACATCTCATCTGGCGGGGTGTATAT	3.1	3.6e-06	-12535	5444		RHE_RS30500																							RHE_RS07675	1	1581331	1582344	R	24299801	-	RHE_RS07675	WP_011424837.1	337	COG0113	H	porphobilinogen synthase	1485
RHE_RS22030	R	RHE_RS03595_m2	R	-80	-49	TTGGAAAACATCAAGTTTCCTAAAGTGTATTC	2.1	5.6e-06	-12093	5252		RHE_RS30505																							RHE_RS07430	1	1527854	1529347	D	24301229	-	RHE_RS07430	WP_011424789.1	497	COG0260	E	cytosol aminopeptidase	1436
RHE_RS22790	R	RHE_RS03595_m2	R	-162	-131	ATTAAATACATGAAAAATAATGATTATTTTGT	1.8	6.4e-06	-11959	5194		RHE_RS30520																							RHE_RS07425	1	1526937	1527710	R	24297645	-	RHE_RS07425	WP_011424788.1	257	COG0671	I	Lipid A 4\'-phosphatase	1435
RHE_RS22795	D	RHE_RS03595_m2	D	-233	-202	ATTAAATACATGAAAAATAATGATTATTTTGT	1.8	6.4e-06	-11959	5194		RHE_RS30525																							RHE_RS07420	1	1525656	1526837	R	24298306	-	RHE_RS07420	WP_011424787.1	393	COG0795	MN	MULTISPECIES: LptF/LptG family permease	1434
RHE_RS28730	D	RHE_RS03595_m2	D	-200	-169	TTGATAAACGGCGGATCATCGGCAATCTTTCT	2.2	5.3e-06	-12148	5276		RHE_RS30545																							RHE_RS07115	1	1467316	1468086	D	24300131	-	RHE_RS07115	WP_011424729.1	256	COG1381	L	DNA repair protein RecO	1372
RHE_RS11595	D	RHE_RS03595_m3	D	-96	-79	AGGTGAAAAGCGTCGGGT	6.3	8.6e-06	-11664	5066		RHE_RS30570																							RHE_RS06845	1	1396358	1397197	R	24298848	-	RHE_RS06845	WP_020920836.1	279	COG2169	L	AraC family transcriptional regulator	1318
RHE_RS22960	D	RHE_RS03595_m3	D	-112	-95	TAATGAATAACATATAAG	7.4	5.0e-06	-12206	5301		RHE_RS30630																							RHE_RS06555	1	1328613	1329173	D	24301122	-	RHE_RS06555	WP_011424620.1	186	COG1309	K	TetR/AcrR family transcriptional regulator	1259
RHE_RS29775	R	RHE_RS03595_m3	R	-250	-233	TATCGAAAAAGATAGCGG	7.3	5.0e-06	-12206	5301		RHE_RS30635																							RHE_RS06535	1	1325425	1326318	R	24298369	-	RHE_RS06535	WP_011424616.1	297	COG0583	K	LysR family transcriptional regulator	1255
RHE_RS29780	D	RHE_RS03595_m3	D	-174	-157	TATCGAAAAAGATAGCGG	7.3	5.0e-06	-12206	5301		RHE_RS30675																							RHE_RS06260	1	1272472	1274481	D	24298420	-	RHE_RS06260	WP_011424560.1	669	COG0457	R	adenylate cyclase	1201
RHE_RS03595	D	RHE_RS03595_m4	D	-20	-3	CCGCTATGTTTTTCATCA	20.3	1.7e-10	-22495	9770		RHE_RS30715																							RHE_RS06045	1	1229659	1231179	R	24300141	-	RHE_RS06045	WP_011424518.1	506	COG0488	R	ABC transporter ATP-binding protein	1157
RHE_RS14990	R	RHE_RS03595_m4	R	-319	-302	CCACCATATTTTTCAACG	5.9	7.1e-06	-11855	5149		RHE_RS30740																							RHE_RS05980	1	1221407	1222105	D	24300109	-	RHE_RS05980	WP_042118117.1	232			hypothetical protein	1144
RHE_RS29630	D	RHE_RS03595_m4	D	-42	-25	GGGCGATCTTTTTCAGTA	5.9	7.1e-06	-11855	5149		RHE_RS30745																							RHE_RS05915	1	1206549	1207445	D	24298628	-	RHE_RS05915	WP_011424494.1	298	COG0583	K	LysR family transcriptional regulator	1132
RHE_RS03595	D	RHE_RS03595_m5	D	-39	-5	TTCATAAACAGAGAAAATCCCGCTATGTTTTTCAT	34.3	1.7e-18	-40916	17770		RHE_RS30775																							RHE_RS05445	1	1117298	1119259	D	24298008	-	RHE_RS05445	WP_011424409.1	653	COG0480	J	elongation factor G	1045
RHE_RS06405	D	RHE_RS03595_m5	D	-109	-75	TTTCGAAACAGAAGATTGCTTCCTGTGCTTTTGCT	1.1	1.7e-06	-13285	5770		RHE_RS31005																							RHE_RS05265	1	1087781	1088035	D	24298606	-	RHE_RS05265	WP_041678841.1	84			DNA-directed RNA polymerase sigma-70 factor	1012
RHE_RS11740	R	RHE_RS03595_m5	R	-100	-66	CTTGAATACGTGAGAAGTCGCTAGATATCTATGTC	-1.0	4.1e-06	-12405	5387		RHE_RS31055																							RHE_RS05110	1	1058691	1059371	R	24300858	-	RHE_RS05110	WP_011424355.1	226	COG1225	O	AhpC/TSA family protein	983
RHE_RS13215	R	RHE_RS03595_m5	R	-56	-22	ATTAGAAAATGCGAGGGATTATTCGTATTTTTGAG	-0.6	3.3e-06	-12622	5481		RHE_RS31100																							RHE_RS04970	1	1033029	1033586	R	24300872	-	RHE_RS04970	WP_011424330.1	185	COG1622	C	cytochrome c oxidase subunit II	954
RHE_RS13220	D	RHE_RS03595_m5	D	-74	-40	ATTAGAAAATGCGAGGGATTATTCGTATTTTTGAG	-0.6	3.3e-06	-12622	5481		RHE_RS31105																							RHE_RS04225	1	879326	879697	R	24300116	-	RHE_RS04225	WP_011424188.1	123	COG0346	Q	drug:proton antiporter	808
RHE_RS18710	D	RHE_RS03595_m5	D	-76	-42	TTTGAAAAAGTCCAAAAAAGGTCCACCTTTTTCAG	0.5	2.1e-06	-13074	5678		RHE_RS31110																							RHE_RS04040	1	839700	840566	R	24300147	-	RHE_RS04040	WP_011424152.1	288	COG5403	S	DUF937 domain-containing protein	771
RHE_RS22030	R	RHE_RS03595_m5	R	-83	-49	TTGGAAAACATCAAGTTTCCTAAAGTGTATTCCAC	0.2	2.4e-06	-12940	5620		RHE_RS31115																							RHE_RS03775	1	783013	783618	D	24299159	-	RHE_RS03775	WP_042117931.1	201	COG1595	K	RNA polymerase sigma factor	721
RHE_RS28020	D	RHE_RS03595_m5	D	-109	-75	TTGAAATGAAGACAGATTTGTCATACATGTGTGAT	-2.9	8.2e-06	-11711	5086		RHE_RS31120																							RHE_RS03465	1	703773	704039	D	24301213	fliQ	RHE_RS03465	WP_011424049.1	88	COG1987	N	MULTISPECIES: flagellar biosynthetic protein FliQ	663
RHE_RS28730	D	RHE_RS03595_m5	D	-200	-166	TTGATAAACGGCGGATCATCGGCAATCTTTCTAGT	-2.0	6.0e-06	-12024	5222		RHE_RS31500																							RHE_RS03210	1	655974	656270	D	24300658	-	RHE_RS03210	WP_020920372.1	98	COG1396	K	XRE family transcriptional regulator	612
RHE_RS03610	D	RHE_RS03610_m1	D	-57	-43	GAATTTGTAAAATTT	12.6	3.5e-07	-14865	6456		RHE_RS31950																							RHE_RS03145	1	639587	641071	D	24301138	-	RHE_RS03145	WP_011423986.1	494	COG4529	R	hydroxyacylglutathione hydrolase	599
RHE_RS03610	D	RHE_RS03610_m1	D	-47	-33	AATTTTGTAAACGTA	10.1	6.4e-06	-11959	5194		RHE_RS32060																							RHE_RS03110	1	633503	634648	D	24299729	-	RHE_RS03110	WP_011423980.1	381	COG5434	G	polysaccharidase	593
RHE_RS15410	R	RHE_RS03610_m1	R	-174	-160	AGATCTGTAAAATTG	9.8	8.5e-06	-11675	5071		RHE_RS32120																							RHE_RS02890	1	596368	597306	D	24300817	-	RHE_RS02890	WP_011423941.1	312	COG0491	R	MBL fold metallo-hydrolase	551
RHE_RS03610	D	RHE_RS03610_m2	D	-157	-139	GATGACAAGATTGACAACA	12.7	3.6e-07	-14837	6444		RHE_RS32295																							RHE_RS02600	1	532567	533250	D	24301529	phoB	RHE_RS02600	WP_004672768.1	227	COG0745	TK	MULTISPECIES: phosphate regulon transcriptional regulatory protein PhoB	496
RHE_RS04650	R	RHE_RS03610_m2	R	-108	-90	TGTGAAAACTGTTAGAATA	9.3	5.5e-06	-12111	5260		RHE_RS32370																							RHE_RS02580	1	528018	529499	D	24301656	pstC	RHE_RS02580	WP_011423885.1	493	COG0573	P	phosphate ABC transporter permease subunit PstC	492
RHE_RS04655	D	RHE_RS03610_m2	D	-94	-76	TGTGAAAACTGTTAGAATA	9.3	5.5e-06	-12111	5260		RHE_RS32435																							RHE_RS02570	1	525233	526453	D	24301199	phoR	RHE_RS02570	WP_042119155.1	406	COG5002	T	phosphate regulon sensor histidine kinase PhoR	490
RHE_RS10885	R	RHE_RS03610_m2	R	-170	-152	CATTACAAATGTGACAAAC	10.1	2.9e-06	-12751	5538		RHE_RS32555																							RHE_RS02195	1	447592	447867	R	24299740	-	RHE_RS02195	WP_020920256.1	91			hypothetical protein	419
RHE_RS10885	R	RHE_RS03610_m2	R	-161	-143	CGTTACATTCATTACAAAT	11.5	9.8e-07	-13836	6009		RHE_RS32675																							RHE_RS01790	1	366574	367350	R	24297804	-	RHE_RS01790	WP_011423738.1	258	COG2226	H	ubiquinone/menaquinone biosynthesis C-methyltransferase UbiE	339
RHE_RS10890	D	RHE_RS03610_m2	D	-97	-79	CGTTACATTCATTACAAAT	11.5	9.8e-07	-13836	6009		RHE_RS32785																							RHE_RS01780	1	363281	364858	R	24298775	-	RHE_RS01780	WP_011423736.1	525	COG2986	E	histidine ammonia-lyase	337
RHE_RS10890	D	RHE_RS03610_m2	D	-88	-70	CATTACAAATGTGACAAAC	10.1	2.9e-06	-12751	5538		RHE_RS32825																							RHE_RS01480	1	299944	300798	D	24301029	-	RHE_RS01480	WP_011423676.1	284	COG2207	K	AraC family transcriptional regulator	280
RHE_RS11900	R	RHE_RS03610_m2	R	-110	-92	TTTTAAATCTGTTACAATT	10.9	1.6e-06	-13346	5796		RHE_RS32880																							RHE_RS01465	1	297509	298351	R	24298022	-	RHE_RS01465	WP_011423673.1	280	COG4221	C	oxidoreductase	278
RHE_RS11905	D	RHE_RS03610_m2	D	-188	-170	TTTTAAATCTGTTACAATT	10.9	1.6e-06	-13346	5796		RHE_RS33115																							RHE_RS01125	1	234753	235748	R	24300104	-	RHE_RS01125	WP_041678801.1	331	COG3191	EQ	S58 family peptidase	212
RHE_RS00415	R	RHE_RS03610_m3	R	-63	-50	AAATTGTAAAAACC	10.5	4.8e-06	-12247	5319		RHE_RS33140																							RHE_RS01095	1	228427	228777	D	24299497	-	RHE_RS01095	WP_011423607.1	116	COG1846	K	MULTISPECIES: MarR family transcriptional regulator	206
RHE_RS03610	D	RHE_RS03610_m3	D	-56	-43	AATTTGTAAAATTT	12.3	2.5e-07	-15202	6602		RHE_RS33160																							RHE_RS00580	1	122600	123451	R	24298733	-	RHE_RS00580	WP_011423508.1	283	COG0596	HR	alpha/beta hydrolase	106
RHE_RS03610	D	RHE_RS03610_m4	D	-77	-45	GATTGACAGAGCGGCGCTGTGAATTTGTAAAAT	22.8	1.1e-11	-25233	10959		RHE_RS33365
RHE_RS15240	D	RHE_RS03610_m4	D	-152	-120	AAGTGACTGGAAAATGGTGTTTTCCTGTCAAGC	5.3	5.2e-06	-12167	5284
RHE_RS32370	R	RHE_RS03610_m4	R	-47	-15	TTTTTACAAATGGAAAATCAGGCTCTGTCGTTG	4.2	8.9e-06	-11629	5051
RHE_RS03610	D	RHE_RS03610_m5	D	-50	-38	TAAAATTTTGTAA	10.4	3.4e-06	-12592	5469
RHE_RS07835	R	RHE_RS03610_m5	R	-100	-88	GTAAAACTTGTCG	10.8	2.0e-06	-13122	5699
RHE_RS22145	R	RHE_RS03610_m5	R	-241	-229	GCAAATGTTGTCA	10.3	4.6e-06	-12289	5337
RHE_RS25540	R	RHE_RS03610_m5	R	-51	-39	TTAAAGGCTGTCA	9.9	6.6e-06	-11928	5180
RHE_RS03775	D	RHE_RS03775_m1	D	-18	-5	GGAAAGGCATGTGA	13.3	2.2e-07	-15330	6658
RHE_RS07165	R	RHE_RS03775_m1	R	-85	-72	AAAAACGCATGCGA	9.1	8.5e-06	-11675	5071
RHE_RS03775	D	RHE_RS03775_m2	D	-37	-25	TGGGCGGGAAGAT	13.2	3.7e-08	-17112	7432
RHE_RS14295	R	RHE_RS03775_m2	R	-190	-178	TTGGCGGGAACAG	10.8	2.7e-06	-12822	5569
RHE_RS15700	D	RHE_RS03775_m3	D	-99	-81	CTGAAATGTAACGGTGGAA	9.7	7.6e-06	-11787	5119
RHE_RS03775	D	RHE_RS03775_m4	D	-31	-12	GGAAGATGGAACCGGAAAGG	12.4	2.7e-07	-15125	6569
RHE_RS15555	D	RHE_RS03775_m4	D	-135	-116	GGCAAAGGGAATGGAAAGCG	9.1	2.6e-06	-12860	5585
RHE_RS18370	D	RHE_RS03775_m4	D	-201	-182	GGCCAACGGATCGGGAAAGG	7.5	7.3e-06	-11828	5137
RHE_RS03775	D	RHE_RS03775_m5	D	-34	-19	GCGGGAAGATGGAACC	15.9	7.4e-09	-18722	8131
RHE_RS06210	R	RHE_RS03775_m5	R	-76	-61	GCTGGAAGATGAAATC	9.5	7.5e-06	-11801	5125
RHE_RS06215	D	RHE_RS03775_m5	D	-104	-89	GCTGGAAGATGAAATC	9.5	7.5e-06	-11801	5125
RHE_RS15155	R	RHE_RS03775_m5	R	-283	-268	GGGAGAAGAGGGAATC	12.3	6.1e-07	-14310	6215
RHE_RS15970	D	RHE_RS03775_m5	D	-103	-88	GCGAGAAAAGCGAATA	11.1	1.9e-06	-13174	5721
RHE_RS02800	R	RHE_RS04010_m1	R	-338	-327	GAAATAGAAACA	12.8	5.6e-07	-14395	6252
RHE_RS17645	D	RHE_RS04010_m1	D	-399	-388	GATATAGAAAGG	10.1	7.1e-06	-11855	5149
RHE_RS18795	D	RHE_RS04010_m1	D	-156	-145	GTAATAGAAACT	9.8	8.4e-06	-11687	5076
RHE_RS04010	R	RHE_RS04010_m2	R	-38	-9	CCTGAAACAATGGCTTTCAATTCTTTCTAT	24.1	2.3e-12	-26798	11638
RHE_RS05850	D	RHE_RS04010_m2	D	-329	-300	GGAGAAACGATAGTTTTCGATCGCTTCGGT	6.4	2.2e-06	-13027	5658
RHE_RS18680	D	RHE_RS04010_m2	D	-66	-37	ATAGAACCAATCGGTTCGATTTCTTTTAAG	8.1	9.8e-07	-13836	6009
RHE_RS02800	R	RHE_RS04010_m3	R	-347	-327	GAAATAGAAACAGTGGGCGCG	3.5	7.6e-06	-11787	5119
RHE_RS06820	D	RHE_RS04010_m3	D	-233	-213	AGAATGGCACCACTGGAAAAG	3.6	7.2e-06	-11841	5143
RHE_RS17645	D	RHE_RS04010_m3	D	-399	-379	GATATAGAAAGGATTGTATCT	8.9	5.5e-07	-14413	6260
RHE_RS04010	R	RHE_RS04010_m4	R	-28	-10	CTGAAACAATGGCTTTCAA	14.9	4.0e-08	-17034	7398
RHE_RS13835	R	RHE_RS04010_m4	R	-101	-83	TAGTCACAAAGTGTTTCTG	9.1	7.8e-06	-11761	5108
RHE_RS26875	R	RHE_RS04010_m4	R	-229	-211	TGGACAGGCAGAGTTTCTG	9.4	6.0e-06	-12024	5222
RHE_RS27415	D	RHE_RS04010_m4	D	-32	-14	TTGAAATGATTTCTTTCTA	13.8	1.6e-07	-15648	6796
RHE_RS04010	R	RHE_RS04010_m5	R	-38	-9	CCTGAAACAATGGCTTTCAATTCTTTCTAT	24.2	2.4e-12	-26756	11620
RHE_RS05850	D	RHE_RS04010_m5	D	-329	-300	GGAGAAACGATAGTTTTCGATCGCTTCGGT	6.3	1.8e-06	-13228	5745
RHE_RS18680	D	RHE_RS04010_m5	D	-66	-37	ATAGAACCAATCGGTTCGATTTCTTTTAAG	6.4	1.6e-06	-13346	5796
RHE_RS04025	D	RHE_RS04025_m1	D	-250	-231	CCATTCCCTCGCAACGAAGA	8.9	4.2e-06	-12380	5377
RHE_RS04025	D	RHE_RS04025_m1	D	-94	-75	CCATTTACCGCTGATGAAGG	19.9	1.0e-10	-23026	10000
RHE_RS27195	D	RHE_RS04025_m1	D	-74	-55	TTAGTTAATGGTAATGAAGA	8.5	5.4e-06	-12129	5268
RHE_RS04025	D	RHE_RS04025_m3	D	-114	-84	TCGTTAAAATGTGAGCTTTTCCATTTACCGC	26.7	3.0e-13	-28835	12523
RHE_RS22960	D	RHE_RS04025_m3	D	-273	-243	TCCTTAAAACTCGTCGTATCGCATTAAACGA	-1.5	8.8e-06	-11641	5056
RHE_RS24090	D	RHE_RS04025_m3	D	-136	-106	ACCTTAAATCAAAAAAATCGCGTTTCACCGC	1.5	2.5e-06	-12899	5602
RHE_RS26275	R	RHE_RS04025_m3	R	-251	-221	AGGGTCAAGCGTGAAGTTTTCCTTTTCCGGC	-1.3	8.2e-06	-11711	5086
RHE_RS26280	D	RHE_RS04025_m3	D	-77	-47	AGGGTCAAGCGTGAAGTTTTCCTTTTCCGGC	-1.3	8.2e-06	-11711	5086
RHE_RS05340	R	RHE_RS04025_m4	R	-42	-25	ACAGAGAACGTATGAACT	10.1	6.5e-06	-11944	5187
RHE_RS05855	R	RHE_RS04025_m4	R	-60	-43	CACGAAATGACTCGACAT	11.1	2.1e-06	-13074	5678
RHE_RS03515	R	RHE_RS04025_m5	R	-220	-198	TTCATTCCACCGAAAGTGAAATG	11.9	6.1e-07	-14310	6215
RHE_RS04025	D	RHE_RS04025_m5	D	-126	-104	CGCGTTTGCCGGTCGTTAAAATG	11.2	1.6e-06	-13346	5796
RHE_RS04030	R	RHE_RS04030_m1	R	-61	-40	AAACATTCGTTGGACTGATCAA	22.4	3.5e-13	-28681	12456
RHE_RS04545	R	RHE_RS04030_m1	R	-293	-272	GTACATTCCCAGAATTGATCGG	8.8	6.0e-06	-12024	5222
RHE_RS10375	D	RHE_RS04030_m1	D	-69	-48	GAACATCCCGTGTTATGATTAC	8.4	7.7e-06	-11774	5114
RHE_RS06380	D	RHE_RS04030_m2	D	-19	-7	CAGAAAGGAGTAG	9.9	9.4e-06	-11575	5027
RHE_RS02330	R	RHE_RS04030_m3	R	-318	-296	ATCATTAATGATCTATGATGATA	8.2	6.5e-06	-11944	5187
RHE_RS04030	R	RHE_RS04030_m3	R	-107	-85	GCAAATCAAGCAAAGTGAAGGAC	9.5	3.1e-06	-12684	5509
RHE_RS22790	R	RHE_RS04030_m3	R	-158	-136	ATACATGAAAAATAATGATTATT	10.0	2.1e-06	-13074	5678
RHE_RS22795	D	RHE_RS04030_m3	D	-228	-206	ATACATGAAAAATAATGATTATT	10.0	2.1e-06	-13074	5678
RHE_RS25040	R	RHE_RS04030_m3	R	-54	-32	GTATATCAGAATTTATGATGCAT	10.3	1.7e-06	-13285	5770
RHE_RS29840	D	RHE_RS04030_m3	D	-88	-66	GCTCATCAGACAATCTGATTGAA	7.8	8.1e-06	-11724	5092
RHE_RS08770	D	RHE_RS04030_m4	D	-280	-270	TATCCTTCATT	10.5	7.8e-06	-11761	5108
RHE_RS04310	D	RHE_RS04310_m1	D	-107	-94	ATTATTTGGAACTT	14.1	1.3e-07	-15856	6886
RHE_RS04310	D	RHE_RS04310_m1	D	-87	-74	ACTATGTGGAATTA	16.0	1.5e-08	-18015	7824
RHE_RS25465	D	RHE_RS04310_m1	D	-144	-131	ACTGTTTGGAATTA	9.4	3.6e-06	-12535	5444
RHE_RS31005	D	RHE_RS04310_m1	D	-170	-157	ATTATCTGCAACTA	9.5	3.6e-06	-12535	5444
RHE_RS25565	D	RHE_RS04310_m2	D	-83	-72	TCCCTTGACAGC	11.4	2.5e-06	-12899	5602
RHE_RS03720	D	RHE_RS04310_m3	D	-81	-61	CGAATTTCATATTTTGGAATT	13.0	1.9e-07	-15476	6721
RHE_RS04310	D	RHE_RS04310_m3	D	-115	-95	GCTGTTCCATTATTTGGAACT	17.9	2.1e-09	-19981	8678
RHE_RS04310	D	RHE_RS04310_m3	D	-95	-75	TTAATTTGACTATGTGGAATT	16.4	1.1e-08	-18325	7959
RHE_RS05330	R	RHE_RS04310_m3	R	-57	-37	ACAGTTCCGAATTTCTGAACT	8.4	3.9e-06	-12455	5409
RHE_RS07110	D	RHE_RS04310_m3	D	-78	-58	GCAGTTTAGCATTTTGGAAAA	7.1	8.1e-06	-11724	5092
RHE_RS18085	R	RHE_RS04310_m3	R	-26	-6	ATAGTTCCAATTTTTGGGACA	15.3	2.9e-08	-17356	7538
RHE_RS29795	R	RHE_RS04310_m3	R	-101	-81	TGAATTTTACGATACGGAATT	9.6	1.9e-06	-13174	5721
RHE_RS04310	D	RHE_RS04310_m4	D	-19	-7	TTAATGGCACATA	10.7	3.6e-06	-12535	5444
RHE_RS20580	D	RHE_RS04310_m4	D	-329	-317	TTATTGGAACTTT	10.1	5.9e-06	-12041	5229
RHE_RS18560	D	RHE_RS04310_m5	D	-61	-48	AAATAATTGAACAA	12.9	2.9e-07	-15053	6538
RHE_RS13695	D	RHE_RS04315_m1	D	-137	-125	GGCAGCTGTCGCC	10.2	2.9e-06	-12751	5538
RHE_RS18970	D	RHE_RS04315_m1	D	-246	-234	TGCAGCGGTCGGC	9.8	6.2e-06	-11991	5208
RHE_RS29575	R	RHE_RS04315_m1	R	-131	-119	AGCAGCGTTCGTG	9.6	8.8e-06	-11641	5056
RHE_RS04315	D	RHE_RS04315_m2	D	-77	-56	TTCACGTCATGCAATTCACGCT	10.7	2.8e-06	-12786	5553
RHE_RS04315	D	RHE_RS04315_m2	D	-63	-42	TTCACGCTCGTCACGCCTCGAT	13.5	6.2e-08	-16596	7208
RHE_RS03515	R	RHE_RS04315_m3	R	-219	-206	ACCGAAAGTGAAAT	10.7	3.0e-06	-12717	5523
RHE_RS04315	D	RHE_RS04315_m3	D	-168	-155	CGCGATATTGAGAT	10.0	7.7e-06	-11774	5114
RHE_RS04315	D	RHE_RS04315_m3	D	-21	-8	GCCGAAGATGAAAA	11.1	1.4e-06	-13479	5854
RHE_RS05110	R	RHE_RS04315_m3	R	-94	-81	CCCGATGTTGAGAT	10.4	4.6e-06	-12289	5337
RHE_RS17815	R	RHE_RS04315_m3	R	-211	-198	CGCGATAATGAGAT	10.8	2.6e-06	-12860	5585
RHE_RS19065	D	RHE_RS04315_m3	D	-395	-382	AGCGAAGATGAAGT	10.5	4.0e-06	-12429	5398
RHE_RS04315	D	RHE_RS04315_m4	D	-47	-28	CTCGATGCAACCGAACCGGC	11.0	1.6e-06	-13346	5796
RHE_RS25740	R	RHE_RS04315_m4	R	-70	-51	AGCGAAACCAGCAAACCGGC	10.9	1.9e-06	-13174	5721
RHE_RS29445	R	RHE_RS04315_m4	R	-388	-369	GCCGATCCAGGACGACCGAC	10.1	5.9e-06	-12041	5229
RHE_RS04315	D	RHE_RS04315_m5	D	-22	-12	CGCCGAAGATG	9.8	2.6e-06	-12860	5585
RHE_RS04575	D	RHE_RS04575_m1	D	-45	-25	TTACTATCTTTTCGATATCGT	19.1	8.7e-10	-20863	9060
RHE_RS04575	D	RHE_RS04575_m1	D	-34	-14	TCGATATCGTGTCACTATCGA	6.2	2.3e-06	-12983	5638
RHE_RS04575	D	RHE_RS04575_m1	D	-23	-3	TCACTATCGAAAAGATACTAA	21.8	2.4e-11	-24453	10620
RHE_RS16670	R	RHE_RS04575_m1	R	-21	-1	ATAAGATTATAAAGATACCGT	4.0	5.9e-06	-12041	5229
RHE_RS23555	D	RHE_RS04575_m1	D	-168	-148	TCAATTTGTTATCGATATCAT	4.2	5.5e-06	-12111	5260
RHE_RS28890	D	RHE_RS04575_m1	D	-118	-98	TCGGTATTTTTAAGATGTCAA	9.3	4.9e-07	-14529	6310
RHE_RS00340	D	RHE_RS04575_m2	D	-65	-56	ATACTATCTT	8.2	5.9e-06	-12041	5229
RHE_RS04575	D	RHE_RS04575_m2	D	-45	-36	TTACTATCTT	12.8	8.6e-07	-13966	6066
RHE_RS04575	D	RHE_RS04575_m2	D	-23	-14	TCACTATCGA	12.3	2.1e-06	-13074	5678
RHE_RS05085	R	RHE_RS04575_m2	R	-205	-196	ATACTATCAA	8.1	7.2e-06	-11841	5143
RHE_RS14990	R	RHE_RS04575_m2	R	-211	-202	ACACTATCAA	7.7	9.6e-06	-11554	5018
RHE_RS01495	R	RHE_RS04575_m3	R	-89	-78	CTGATAGTAACT	11.0	1.4e-06	-13479	5854
RHE_RS04575	D	RHE_RS04575_m4	D	-68	-40	GTGGATCATCGCTGCCCGATCTGTTACTA	31.5	9.2e-16	-34622	15036
RHE_RS09090	R	RHE_RS04575_m4	R	-57	-29	ATGGATGACCTCTGGGTAACCACTTGCAG	1.9	5.2e-06	-12167	5284
RHE_RS02385	D	RHE_RS04575_m5	D	-164	-135	TCAATTTTAAATCGAAAATTTATCATTATT	-7.6	6.9e-06	-11884	5161
RHE_RS04575	D	RHE_RS04575_m5	D	-45	-16	TTACTATCTTTTCGATATCGTGTCACTATC	38.8	2.6e-19	-42794	18585
RHE_RS07685	D	RHE_RS04575_m5	D	-78	-49	TTTATATGTATTCGATAGGGTCTCACTCAA	3.2	7.4e-08	-16419	7131
RHE_RS09265	D	RHE_RS04575_m5	D	-125	-96	TCAATTTCTTTACGTAAGCTAGCCACTGCA	-7.0	5.3e-06	-12148	5276
RHE_RS23565	R	RHE_RS04575_m5	R	-59	-30	TGATTATGTTATCGATAACATATAATTCGG	-7.3	6.0e-06	-12024	5222
RHE_RS33115	R	RHE_RS04575_m5	R	-78	-49	GGAATCCCAAATCATTAATTTGTCACTACA	-7.9	7.8e-06	-11761	5108
RHE_RS00725	D	RHE_RS04625_m1	D	-27	-8	GGTTCATGTATAAGAGAGTG	8.9	8.2e-07	-14014	6086
RHE_RS04625	R	RHE_RS04625_m1	R	-50	-31	CGCTCGTGTATACACAAACA	18.7	1.4e-09	-20387	8854
RHE_RS10960	R	RHE_RS04625_m1	R	-55	-36	CGATTATGTATACAATGTTG	6.5	2.8e-06	-12786	5553
RHE_RS22620	R	RHE_RS04625_m1	R	-34	-15	CAATTCTGTAAACAAGATGA	6.5	2.9e-06	-12751	5538
RHE_RS04625	R	RHE_RS04625_m2	R	-66	-37	TGTATACACAAACATTGACGTCGTGTACGA	7.0	6.0e-06	-12024	5222
RHE_RS04625	R	RHE_RS04625_m2	R	-64	-35	CGTGTATACACAAACATTGACGTCGTGTAC	22.4	1.2e-11	-25146	10921
RHE_RS04625	R	RHE_RS04625_m2	R	-43	-14	CCTTCATACATAATTGCCGCTCGTGTATAC	17.9	1.7e-09	-20193	8770
RHE_RS23665	R	RHE_RS04625_m2	R	-71	-42	CTTGCGCGCACTATTGCCGATCTCGAATAG	7.4	4.4e-06	-12334	5357
RHE_RS04625	R	RHE_RS04625_m3	R	-69	-37	TGTATACACAAACATTGACGTCGTGTACGAAGA	6.3	2.9e-06	-12751	5538
RHE_RS04625	R	RHE_RS04625_m3	R	-67	-35	CGTGTATACACAAACATTGACGTCGTGTACGAA	23.7	4.4e-12	-26149	11357
RHE_RS04625	R	RHE_RS04625_m3	R	-46	-14	CCTTCATACATAATTGCCGCTCGTGTATACACA	20.9	8.2e-11	-23224	10086
RHE_RS23665	R	RHE_RS04625_m3	R	-74	-42	CTTGCGCGCACTATTGCCGATCTCGAATAGATG	8.0	1.1e-06	-13720	5959
RHE_RS04625	R	RHE_RS04625_m4	R	-69	-37	TGTATACACAAACATTGACGTCGTGTACGAAGA	6.3	3.0e-06	-12717	5523
RHE_RS04625	R	RHE_RS04625_m4	R	-67	-35	CGTGTATACACAAACATTGACGTCGTGTACGAA	23.7	4.4e-12	-26149	11357
RHE_RS04625	R	RHE_RS04625_m4	R	-46	-14	CCTTCATACATAATTGCCGCTCGTGTATACACA	20.9	8.3e-11	-23212	10081
RHE_RS23665	R	RHE_RS04625_m4	R	-74	-42	CTTGCGCGCACTATTGCCGATCTCGAATAGATG	8.0	1.1e-06	-13720	5959
RHE_RS00725	D	RHE_RS04625_m5	D	-23	-1	CATGTATAAGAGAGTGGTGCAGT	3.0	4.1e-06	-12405	5387
RHE_RS04625	R	RHE_RS04625_m5	R	-57	-35	CGTGTATACACAAACATTGACGT	22.6	2.2e-11	-24540	10658
RHE_RS14170	R	RHE_RS04625_m5	R	-288	-266	CTTATAAAAAAGATCGTTCACGC	2.9	4.2e-06	-12380	5377
RHE_RS14175	D	RHE_RS04625_m5	D	-170	-148	CTTATAAAAAAGATCGTTCACGC	2.9	4.2e-06	-12380	5377
RHE_RS00340	D	RHE_RS04645_m1	D	-296	-286	AAATATTACAA	9.6	8.7e-06	-11652	5060
RHE_RS04625	R	RHE_RS04645_m1	R	-90	-80	ACATACTACAG	10.8	3.4e-06	-12592	5469
RHE_RS10680	D	RHE_RS04645_m1	D	-59	-49	TAATACTATAT	9.9	6.6e-06	-11928	5180
RHE_RS04645	D	RHE_RS04645_m2	D	-192	-179	CGCCCGCGGCGGTT	10.1	4.9e-06	-12226	5310
RHE_RS12920	R	RHE_RS04645_m2	R	-58	-45	TCCCCCCGGCGGGG	11.1	9.0e-07	-13921	6046
RHE_RS24010	D	RHE_RS04645_m2	D	-27	-14	CTCCCGCGGCGGGA	10.5	2.6e-06	-12860	5585
RHE_RS04550	R	RHE_RS04645_m3	R	-35	-18	TGCGAAGGCGATGTCATC	11.1	2.4e-06	-12940	5620
RHE_RS04555	D	RHE_RS04645_m3	D	-194	-177	TGCGAAGGCGATGTCATC	11.1	2.4e-06	-12940	5620
RHE_RS04645	D	RHE_RS04645_m3	D	-41	-24	TTCGAAGATGATTTCATT	14.7	1.0e-09	-20723	9000
RHE_RS04645	D	RHE_RS04645_m5	D	-18	-9	ATGTTGAAAT	11.4	1.3e-06	-13553	5886
RHE_RS23105	R	RHE_RS04645_m5	R	-128	-119	AGGTTGAAAT	10.4	4.9e-06	-12226	5310
RHE_RS23110	D	RHE_RS04645_m5	D	-94	-85	AGGTTGAAAT	10.4	4.9e-06	-12226	5310
RHE_RS00340	D	RHE_RS04655_m1	D	-307	-283	CAGATGACAAAAAATATTACAATTT	9.7	8.8e-07	-13943	6056
RHE_RS04650	R	RHE_RS04655_m1	R	-119	-95	AAACTGTTAGAATAATTTACATGTT	24.3	7.8e-13	-27879	12108
RHE_RS04655	D	RHE_RS04655_m1	D	-89	-65	AAACTGTTAGAATAATTTACATGTT	24.3	7.8e-13	-27879	12108
RHE_RS05730	D	RHE_RS04655_m1	D	-95	-71	CAGATGTTAGTAGAATCTAAATTAT	8.4	2.0e-06	-13122	5699
RHE_RS12585	D	RHE_RS04655_m1	D	-262	-238	GAAATGTAATAATCATTTTCAAATT	6.7	5.3e-06	-12148	5276
RHE_RS13835	R	RHE_RS04655_m1	R	-114	-90	AAAGTGTTTCTGATTCTTACATCTT	10.9	4.0e-07	-14732	6398
RHE_RS15410	R	RHE_RS04655_m1	R	-185	-161	GATCTGTAAAATTGTGTTGCAGCTG	6.2	7.0e-06	-11870	5155
RHE_RS04650	R	RHE_RS04655_m2	R	-118	-99	TGTTAGAATAATTTACATGT	26.7	1.5e-13	-29528	12824
RHE_RS04655	D	RHE_RS04655_m2	D	-85	-66	TGTTAGAATAATTTACATGT	26.7	1.5e-13	-29528	12824
RHE_RS05730	D	RHE_RS04655_m2	D	-91	-72	TGTTAGTAGAATCTAAATTA	6.9	3.1e-06	-12684	5509
RHE_RS16260	D	RHE_RS04655_m2	D	-155	-136	TGTTCGGATGATCTACATTC	5.3	7.5e-06	-11801	5125
RHE_RS04650	R	RHE_RS04655_m3	R	-109	-97	ACTGTTAGAATAA	17.7	3.7e-09	-19415	8432
RHE_RS04655	D	RHE_RS04655_m3	D	-87	-75	ACTGTTAGAATAA	17.7	3.7e-09	-19415	8432
RHE_RS04650	R	RHE_RS04655_m4	R	-119	-99	TGTTAGAATAATTTACATGTT	25.2	5.3e-13	-28266	12276
RHE_RS04655	D	RHE_RS04655_m4	D	-85	-65	TGTTAGAATAATTTACATGTT	25.2	5.3e-13	-28266	12276
RHE_RS05730	D	RHE_RS04655_m4	D	-91	-71	TGTTAGTAGAATCTAAATTAT	4.4	5.4e-06	-12129	5268
RHE_RS17815	R	RHE_RS04655_m4	R	-60	-40	TTTTCGAAGACGTAACACGAC	4.4	5.4e-06	-12129	5268
RHE_RS20665	D	RHE_RS04655_m4	D	-182	-162	TCATTGAATAAAATACATATT	4.4	5.4e-06	-12129	5268
RHE_RS29775	R	RHE_RS04655_m4	R	-287	-267	CAACCGAATTCTTTACAAGAT	5.2	3.6e-06	-12535	5444
RHE_RS29780	D	RHE_RS04655_m4	D	-140	-120	CAACCGAATTCTTTACAAGAT	5.2	3.6e-06	-12535	5444
RHE_RS04650	R	RHE_RS04655_m5	R	-101	-83	TCTAAATTGTGAAAACTGT	14.8	4.5e-08	-16917	7347
RHE_RS04655	D	RHE_RS04655_m5	D	-101	-83	TCTAAATTGTGAAAACTGT	14.8	4.5e-08	-16917	7347
RHE_RS06210	R	RHE_RS04655_m5	R	-96	-78	CGAAAATTCTGCAAACTGT	8.9	5.8e-06	-12058	5237
RHE_RS06215	D	RHE_RS04655_m5	D	-87	-69	CGAAAATTCTGCAAACTGT	8.9	5.8e-06	-12058	5237
RHE_RS06680	D	RHE_RS04655_m5	D	-182	-164	ACTAAGTGGTTATAACGGC	8.4	8.3e-06	-11699	5081
RHE_RS06680	D	RHE_RS04655_m5	D	-133	-115	TTCAAATTATACTAATATA	8.2	9.6e-06	-11554	5018
RHE_RS08095	D	RHE_RS04655_m5	D	-67	-49	TGTAAAGATTTCAAACAAT	12.1	4.9e-07	-14529	6310
RHE_RS04700	R	RHE_RS04705_m1	R	-115	-86	GCGGATCGAAATTCGTAACAATGCTTCAAC	22.5	3.1e-12	-26500	11509
RHE_RS04705	D	RHE_RS04705_m1	D	-63	-34	GCGGATCGAAATTCGTAACAATGCTTCAAC	22.5	3.1e-12	-26500	11509
RHE_RS14500	R	RHE_RS04705_m1	R	-260	-231	ATTGCACAAGATGCGTGGCATTGGAGCAAC	6.6	8.6e-06	-11664	5066
RHE_RS17135	D	RHE_RS04705_m1	D	-54	-25	ACTGTTCCGATTCTCGAATAATAGTGCAAC	6.6	8.6e-06	-11664	5066
RHE_RS17955	R	RHE_RS04705_m1	R	-99	-70	CCGGGGCGAAAACCGTGACTTTACAACAGC	8.0	3.9e-06	-12455	5409
RHE_RS18840	R	RHE_RS04705_m1	R	-186	-157	ATGCATGAAGGCTTGTAATTCCCCGTCAAC	8.3	3.2e-06	-12652	5495
RHE_RS04700	R	RHE_RS04705_m2	R	-123	-104	CAATGCTTCAACAGTTGACA	20.1	3.1e-10	-21894	9509
RHE_RS04705	D	RHE_RS04705_m2	D	-45	-26	CAATGCTTCAACAGTTGACA	20.1	3.1e-10	-21894	9509
RHE_RS11360	D	RHE_RS04705_m2	D	-89	-70	CAATGTTGCCTCAATTGACG	7.5	5.7e-06	-12075	5244
RHE_RS19295	D	RHE_RS04705_m2	D	-183	-164	AAATGCTGCACCAGCTAACA	9.8	1.2e-06	-13633	5921
RHE_RS04700	R	RHE_RS04705_m3	R	-115	-86	GCGGATCGAAATTCGTAACAATGCTTCAAC	23.5	1.3e-12	-27369	11886
RHE_RS04705	D	RHE_RS04705_m3	D	-63	-34	GCGGATCGAAATTCGTAACAATGCTTCAAC	23.5	1.3e-12	-27369	11886
RHE_RS14500	R	RHE_RS04705_m3	R	-260	-231	ATTGCACAAGATGCGTGGCATTGGAGCAAC	6.0	7.5e-06	-11801	5125
RHE_RS17955	R	RHE_RS04705_m3	R	-99	-70	CCGGGGCGAAAACCGTGACTTTACAACAGC	7.9	2.6e-06	-12860	5585
RHE_RS25580	R	RHE_RS04705_m4	R	-87	-63	TCGCAAGATCTTACCGATGATCACG	5.1	9.3e-06	-11585	5032
RHE_RS25585	D	RHE_RS04705_m4	D	-92	-68	TCGCAAGATCTTACCGATGATCACG	5.1	9.3e-06	-11585	5032
RHE_RS12120	R	RHE_RS04705_m5	R	-98	-77	TGATCAGAAATCTTGAAGCGTT	6.1	3.3e-06	-12622	5481
RHE_RS12125	D	RHE_RS04705_m5	D	-204	-183	TGATCAGAAATCTTGAAGCGTT	6.1	3.3e-06	-12622	5481
RHE_RS19295	D	RHE_RS04705_m5	D	-26	-5	TTATCTCAAGTCTTGGAGCGTT	7.8	1.0e-06	-13816	6000
RHE_RS04995	R	RHE_RS05000_m1	R	-130	-111	CACGTTGCGCCAGACGCAAC	14.5	7.5e-08	-16406	7125
RHE_RS05000	D	RHE_RS05000_m1	D	-71	-52	CACGTTGCGCCAGACGCAAC	14.5	7.5e-08	-16406	7125
RHE_RS04995	R	RHE_RS05000_m2	R	-153	-122	AGACGCAACGGAAGCAATGCTCATTTGCGTGT	13.6	4.1e-08	-17010	7387
RHE_RS05000	D	RHE_RS05000_m2	D	-60	-29	AGACGCAACGGAAGCAATGCTCATTTGCGTGT	13.6	4.1e-08	-17010	7387
RHE_RS20575	D	RHE_RS05000_m2	D	-361	-330	TTACGCGATGAAACGTTTTAAATCCTGCGTGT	3.9	8.2e-06	-11711	5086
RHE_RS20490	D	RHE_RS05000_m3	D	-234	-209	TGCGCCATAGTTCGCAGAAAACTAGG	11.5	1.3e-06	-13553	5886
RHE_RS02800	R	RHE_RS05000_m4	R	-290	-274	CTAGCGTGTTGCGCCAC	9.4	9.7e-06	-11543	5013
RHE_RS04995	R	RHE_RS05000_m4	R	-161	-145	TTTGCGTGTGACGCCAT	10.6	3.7e-06	-12507	5432
RHE_RS04995	R	RHE_RS05000_m4	R	-130	-114	GTTGCGCCAGACGCAAC	14.7	2.4e-08	-17545	7620
RHE_RS05000	D	RHE_RS05000_m4	D	-68	-52	GTTGCGCCAGACGCAAC	14.7	2.4e-08	-17545	7620
RHE_RS05000	D	RHE_RS05000_m4	D	-37	-21	TTTGCGTGTGACGCCAT	10.6	3.7e-06	-12507	5432
RHE_RS07935	R	RHE_RS05000_m4	R	-135	-119	GCGGCGCCTGGCGCAAG	10.1	5.6e-06	-12093	5252
RHE_RS04995	R	RHE_RS05000_m5	R	-153	-131	GGAAGCAATGCTCATTTGCGTGT	12.1	8.6e-07	-13966	6066
RHE_RS05000	D	RHE_RS05000_m5	D	-51	-29	GGAAGCAATGCTCATTTGCGTGT	12.1	8.6e-07	-13966	6066
RHE_RS25035	R	RHE_RS05000_m5	R	-184	-162	TGATGCACGAAATAAATGCGATT	10.8	2.6e-06	-12860	5585
RHE_RS12840	R	RHE_RS05020_m1	R	-326	-297	CCAATGCTTCGGCTATCGTCGCCGCCTTCC	6.3	5.5e-06	-12111	5260
RHE_RS31055	D	RHE_RS05020_m1	D	-62	-33	CGCAATCTTCGGTAATGGGCGCAGCATTGG	6.2	5.8e-06	-12058	5237
RHE_RS05020	R	RHE_RS05020_m2	R	-40	-14	AACCGAAGCATTGTCGTCAGGCAATGT	21.6	5.1e-11	-23699	10292
RHE_RS10750	R	RHE_RS05020_m2	R	-197	-171	ACCCGAAGTTTCGGGGTCATGCATTTG	6.3	1.6e-06	-13346	5796
RHE_RS28555	D	RHE_RS05020_m2	D	-126	-100	CATCGAAGCAAACGCTAAGGGCAATGT	4.5	3.8e-06	-12481	5420
RHE_RS29775	R	RHE_RS05020_m2	R	-294	-268	AACCGAATTCTTTACAAGATTCAATAG	5.0	3.1e-06	-12684	5509
RHE_RS29780	D	RHE_RS05020_m2	D	-139	-113	AACCGAATTCTTTACAAGATTCAATAG	5.0	3.1e-06	-12684	5509
RHE_RS03430	D	RHE_RS05020_m3	D	-37	-28	TCATCGAAGT	10.2	9.5e-06	-11564	5022
RHE_RS18680	D	RHE_RS05020_m3	D	-128	-119	TAATCGAACT	11.7	6.4e-07	-14262	6194
RHE_RS12840	R	RHE_RS05020_m4	R	-326	-297	CCAATGCTTCGGCTATCGTCGCCGCCTTCC	6.5	4.8e-06	-12247	5319
RHE_RS31055	D	RHE_RS05020_m4	D	-62	-33	CGCAATCTTCGGTAATGGGCGCAGCATTGG	5.8	6.9e-06	-11884	5161
RHE_RS05020	R	RHE_RS05020_m5	R	-39	-19	AAGCATTGTCGTCAGGCAATG	16.1	1.5e-08	-18015	7824
RHE_RS05170	R	RHE_RS05170_m1	R	-100	-80	CTCGTGAACAACGTTCATAAA	18.6	1.3e-09	-20461	8886
RHE_RS05170	R	RHE_RS05170_m1	R	-64	-44	ATCTTGAACGTCGTTCATGAT	20.6	5.3e-11	-23661	10276
RHE_RS05170	R	RHE_RS05170_m1	R	-41	-21	ATTTTGAACGACGTTCAAAAT	21.3	1.1e-11	-25233	10959
RHE_RS05170	R	RHE_RS05170_m2	R	-100	-80	CTCGTGAACAACGTTCATAAA	18.4	1.5e-09	-20318	8824
RHE_RS05170	R	RHE_RS05170_m2	R	-64	-44	ATCTTGAACGTCGTTCATGAT	20.4	5.5e-11	-23624	10260
RHE_RS05170	R	RHE_RS05170_m2	R	-41	-21	ATTTTGAACGACGTTCAAAAT	21.2	6.8e-12	-25714	11167
RHE_RS05170	R	RHE_RS05170_m3	R	-98	-81	TCGTGAACAACGTTCATA	17.7	3.6e-09	-19442	8444
RHE_RS05170	R	RHE_RS05170_m3	R	-62	-45	TCTTGAACGTCGTTCATG	18.5	6.1e-10	-21218	9215
RHE_RS05170	R	RHE_RS05170_m3	R	-39	-22	TTTTGAACGACGTTCAAA	18.9	3.8e-10	-21691	9420
RHE_RS26350	R	RHE_RS05170_m3	R	-59	-42	CTTTGGACGACGCTCAAT	7.2	4.2e-06	-12380	5377
RHE_RS26355	D	RHE_RS05170_m3	D	-92	-75	CTTTGGACGACGCTCAAT	7.2	4.2e-06	-12380	5377
RHE_RS05170	R	RHE_RS05170_m4	R	-98	-88	CAACGTTCATA	11.8	1.6e-06	-13346	5796
RHE_RS05170	R	RHE_RS05170_m4	R	-62	-52	CGTCGTTCATG	10.7	4.9e-06	-12226	5310
RHE_RS05170	R	RHE_RS05170_m4	R	-39	-29	CGACGTTCAAA	12.2	6.3e-07	-14278	6201
RHE_RS05170	R	RHE_RS05170_m5	R	-92	-82	CGTGAACAACG	11.9	7.3e-07	-14130	6137
RHE_RS05170	R	RHE_RS05170_m5	R	-33	-23	TTTGAACGACG	10.9	4.2e-06	-12380	5377
RHE_RS05300	D	RHE_RS05170_m5	D	-48	-38	TTTGAACGACG	10.9	4.2e-06	-12380	5377
RHE_RS06395	R	RHE_RS05255_m1	R	-153	-140	ATTAAGGGTTTTAT	10.0	3.6e-06	-12535	5444
RHE_RS16120	D	RHE_RS05255_m1	D	-59	-46	TTTTAGTGCATGTT	8.6	9.3e-06	-11585	5032
RHE_RS19065	D	RHE_RS05255_m1	D	-101	-88	TACTAGGGCACAAT	10.7	2.2e-06	-13027	5658
RHE_RS05255	R	RHE_RS05255_m2	R	-80	-58	GCGAGGTATTTTACGTACCCTTA	19.4	5.4e-10	-21339	9268
RHE_RS05255	R	RHE_RS05255_m2	R	-45	-23	AAAAGGTACATGTAATGCCCTAA	20.4	1.9e-10	-22384	9721
RHE_RS08960	R	RHE_RS05255_m2	R	-397	-375	TCCGGGCACTTTTAGTGCCCGGA	10.0	3.4e-07	-14894	6469
RHE_RS09465	D	RHE_RS05255_m2	D	-65	-43	CCGGGGCATGAGATATGTCCTTA	4.8	4.6e-06	-12289	5337
RHE_RS25465	D	RHE_RS05255_m2	D	-141	-119	GTTTGGAATTAGTTGTACCCCAC	4.2	5.8e-06	-12058	5237
RHE_RS26635	D	RHE_RS05255_m2	D	-128	-106	ATCTGGTATAATGAGTACTCCAA	3.2	8.9e-06	-11629	5051
RHE_RS05255	R	RHE_RS05255_m3	R	-82	-56	GTGCGAGGTATTTTACGTACCCTTATG	10.3	8.2e-08	-16317	7086
RHE_RS05255	R	RHE_RS05255_m3	R	-47	-21	AAAAAAGGTACATGTAATGCCCTAAAT	14.8	5.5e-09	-19019	8260
RHE_RS14185	R	RHE_RS05255_m3	R	-121	-95	CATAAGGATATTAATTGTCCTTAATTA	3.9	2.2e-06	-13027	5658
RHE_RS14190	D	RHE_RS05255_m3	D	-41	-15	CATAAGGATATTAATTGTCCTTAATTA	3.9	2.2e-06	-13027	5658
RHE_RS14210	R	RHE_RS05255_m3	R	-63	-37	ATTAAGGATATATGTTATCCGCAAATC	0.9	8.9e-06	-11629	5051
RHE_RS20575	D	RHE_RS05255_m3	D	-237	-211	ATTTGTGGCATGACGCATGCCCAAAAC	0.6	9.7e-06	-11543	5013
RHE_RS03430	D	RHE_RS05255_m4	D	-52	-40	ATTCGTACCCATA	7.9	8.3e-06	-11699	5081
RHE_RS05255	R	RHE_RS05255_m4	R	-80	-68	TTACGTACCCTTA	13.9	2.3e-07	-15285	6638
RHE_RS05255	R	RHE_RS05255_m4	R	-21	-9	AATTATACCCTAA	14.3	1.3e-07	-15856	6886
RHE_RS22610	R	RHE_RS05255_m4	R	-262	-250	ATTTGTACTCTTA	8.3	6.3e-06	-11975	5201
RHE_RS23690	R	RHE_RS05255_m4	R	-81	-69	ATACGTACTCTAT	8.1	7.1e-06	-11855	5149
RHE_RS25775	R	RHE_RS05255_m4	R	-48	-36	ATATATACCCCTA	9.8	2.6e-06	-12860	5585
RHE_RS32825	R	RHE_RS05255_m4	R	-52	-40	ATATGTACACTTA	9.9	2.5e-06	-12899	5602
RHE_RS03430	D	RHE_RS05255_m5	D	-146	-122	TCAGGCTACTATATGTAGATCAAAT	0.4	5.6e-06	-12093	5252
RHE_RS05255	R	RHE_RS05255_m5	R	-82	-58	GCGAGGTATTTTACGTACCCTTATG	2.9	1.8e-06	-13228	5745
RHE_RS14185	R	RHE_RS05255_m5	R	-121	-97	TAAGGATATTAATTGTCCTTAATTA	4.1	1.0e-06	-13816	6000
RHE_RS14190	D	RHE_RS05255_m5	D	-39	-15	TAAGGATATTAATTGTCCTTAATTA	4.1	1.0e-06	-13816	6000
RHE_RS22625	R	RHE_RS05255_m5	R	-113	-89	TTAGTAGATTAAATGATCCGATTTT	-0.4	7.9e-06	-11749	5102
RHE_RS22630	D	RHE_RS05255_m5	D	-144	-120	TTAGTAGATTAAATGATCCGATTTT	-0.4	7.9e-06	-11749	5102
RHE_RS22960	D	RHE_RS05255_m5	D	-44	-20	TTATGGTATACCATAATACCTAATA	0.1	6.4e-06	-11959	5194
RHE_RS31005	D	RHE_RS05255_m5	D	-41	-17	TTTGGATATAAAATATCCGTTGTTT	0.1	6.4e-06	-11959	5194
RHE_RS05265	D	RHE_RS05265_m1	D	-105	-88	TCGGCGACGCCAGCCTCT	12.4	6.3e-07	-14278	6201
RHE_RS05265	D	RHE_RS05265_m2	D	-124	-109	CTGGCGTCGTCGCGCT	10.7	3.2e-06	-12652	5495
RHE_RS05265	D	RHE_RS05265_m2	D	-105	-90	TCGGCGACGCCAGCCT	10.3	5.1e-06	-12186	5292
RHE_RS11360	D	RHE_RS05265_m2	D	-273	-258	GCGGCGTCGCCTCCCG	11.3	1.4e-06	-13479	5854
RHE_RS28510	R	RHE_RS05265_m2	R	-223	-208	CCGGCGTCGCGGCGGA	9.9	8.0e-06	-11736	5097
RHE_RS05265	D	RHE_RS05265_m3	D	-104	-93	CGGCGACGCCAG	9.5	6.2e-06	-11991	5208
RHE_RS12440	D	RHE_RS05265_m4	D	-396	-379	TCTGCGGGCGCCGCCTGG	10.5	2.8e-06	-12786	5553
RHE_RS17260	D	RHE_RS05265_m4	D	-71	-54	ACCCCGGGCGGCGCCCTG	9.9	6.4e-06	-11959	5194
RHE_RS17320	D	RHE_RS05265_m5	D	-63	-34	AAAAGCGGCCATACCGGACGGCCTGAGCGG	8.4	3.4e-06	-12592	5469
RHE_RS29390	D	RHE_RS05265_m5	D	-63	-34	GAGCGTGACGGCGCCTGCCAGCGGGCGCCG	8.6	3.0e-06	-12717	5523
RHE_RS00765	R	RHE_RS05315_m1	R	-332	-311	TACGTTACAAATCGGTAACAGT	5.7	2.8e-06	-12786	5553
RHE_RS02130	R	RHE_RS05315_m1	R	-86	-65	CCAGTTAAACATCGGTAAGCTG	6.8	1.6e-06	-13346	5796
RHE_RS05315	R	RHE_RS05315_m1	R	-81	-60	CAACTTAACGATTGGTAAGGGG	21.1	8.6e-11	-23177	10066
RHE_RS13630	D	RHE_RS05315_m1	D	-109	-88	AAGCTTACAAAATGGCAGGTTT	3.3	9.2e-06	-11596	5036
RHE_RS17090	D	RHE_RS05315_m1	D	-126	-105	CGCCATACTTATCTGTATATGG	7.6	1.0e-06	-13816	6000
RHE_RS20810	D	RHE_RS05315_m1	D	-125	-104	CACCTCATGAATAGGTAAGGCC	4.5	5.2e-06	-12167	5284
RHE_RS24540	D	RHE_RS05315_m1	D	-79	-58	CAACTGACCAAATCGTACATTG	7.8	9.9e-07	-13826	6004
RHE_RS25040	R	RHE_RS05315_m1	R	-221	-200	AACCTTACCAAAATGTAATGTA	9.7	3.2e-07	-14955	6495
RHE_RS20810	D	RHE_RS05315_m2	D	-347	-323	TTGCCGATCCTGTCGAACGGCTATG	10.8	2.5e-06	-12899	5602
RHE_RS20810	D	RHE_RS05315_m2	D	-63	-39	TAGCCAAACCGTGAGAGTCGTTATA	10.2	4.4e-06	-12334	5357
RHE_RS05315	R	RHE_RS05315_m3	R	-37	-26	GCGGCAAGATCT	12.5	7.3e-07	-14130	6137
RHE_RS18370	D	RHE_RS05315_m3	D	-18	-7	TTGGCGAGATCT	9.8	6.3e-06	-11975	5201
RHE_RS05315	R	RHE_RS05315_m4	R	-64	-35	TCTAGCCGAGAGGGTGGCCGGGCGGCAACT	29.2	2.8e-15	-33509	14553
RHE_RS33365	D	RHE_RS05315_m4	D	-148	-119	GTTAGCAGAGGCGACGCCGCTGCCCCTAAC	6.3	1.6e-06	-13346	5796
RHE_RS05315	R	RHE_RS05315_m5	R	-68	-42	GAGAGGGTGGCCGGGCGGCAACTTAAC	22.9	7.8e-13	-27879	12108
RHE_RS04115	R	RHE_RS05330_m1	R	-23	-13	CTTGAACTATG	10.6	4.1e-06	-12405	5387
RHE_RS05330	R	RHE_RS05330_m1	R	-60	-50	TCTGAACTACG	10.7	3.6e-06	-12535	5444
RHE_RS18650	D	RHE_RS05330_m1	D	-212	-202	CTTGAACTAGT	10.5	4.1e-06	-12405	5387
RHE_RS29835	R	RHE_RS05330_m1	R	-400	-390	ATTGAACTAGG	11.4	1.7e-06	-13285	5770
RHE_RS29840	D	RHE_RS05330_m1	D	-211	-201	ATTGAACTAGG	11.4	1.7e-06	-13285	5770
RHE_RS05330	R	RHE_RS05330_m2	R	-68	-50	TCTGAACTACGGAACAGGG	13.8	1.2e-07	-15936	6921
RHE_RS05330	R	RHE_RS05330_m2	R	-60	-42	TCCGAATTTCTGAACTACG	16.2	9.2e-09	-18504	8036
RHE_RS05330	R	RHE_RS05330_m3	R	-68	-50	TCTGAACTACGGAACAGGG	15.5	1.9e-08	-17779	7721
RHE_RS05330	R	RHE_RS05330_m3	R	-60	-42	TCCGAATTTCTGAACTACG	14.1	8.7e-08	-16257	7060
RHE_RS32825	R	RHE_RS05330_m3	R	-248	-230	ACGAAACTATTGAAGGTAG	9.5	5.8e-06	-12058	5237
RHE_RS03645	R	RHE_RS05330_m4	R	-164	-151	GCTCTATATAGACG	9.5	9.1e-06	-11607	5041
RHE_RS05330	R	RHE_RS05330_m4	R	-18	-5	ATTTTATATAGCCT	12.3	8.6e-07	-13966	6066
RHE_RS05495	R	RHE_RS05330_m4	R	-27	-14	TAGCTATATAGCCA	11.8	1.4e-06	-13479	5854
RHE_RS15210	R	RHE_RS05330_m4	R	-48	-35	CTTCTATATAAAGC	9.8	7.2e-06	-11841	5143
RHE_RS20325	D	RHE_RS05330_m4	D	-48	-35	GATCTATATAGATC	9.4	9.8e-06	-11533	5009
RHE_RS28160	R	RHE_RS05330_m4	R	-54	-41	TCTCTATATAAAAA	12.8	4.7e-07	-14571	6328
RHE_RS28165	D	RHE_RS05330_m4	D	-278	-265	TCTCTATATAAAAA	12.8	4.7e-07	-14571	6328
RHE_RS03170	R	RHE_RS05330_m5	R	-56	-32	ATTTTTTCCGAAATCGAGGAATACT	2.8	9.8e-06	-11533	5009
RHE_RS03175	D	RHE_RS05330_m5	D	-167	-143	ATTTTTTCCGAAATCGAGGAATACT	2.8	9.8e-06	-11533	5009
RHE_RS04155	D	RHE_RS05330_m5	D	-97	-73	CTTCGTTCAACAATGTTGAACAATG	3.0	9.4e-06	-11575	5027
RHE_RS04310	D	RHE_RS05330_m5	D	-116	-92	AGCTGTTCCATTATTTGGAACTTAA	3.3	7.7e-06	-11774	5114
RHE_RS05330	R	RHE_RS05330_m5	R	-68	-44	CGAATTTCTGAACTACGGAACAGGG	4.8	3.8e-06	-12481	5420
RHE_RS05330	R	RHE_RS05330_m5	R	-60	-36	AACAGTTCCGAATTTCTGAACTACG	24.6	1.9e-12	-26989	11721
RHE_RS05815	R	RHE_RS05330_m5	R	-168	-144	CATATTTCAAAACTACGGGGAGGTG	4.3	5.1e-06	-12186	5292
RHE_RS12380	D	RHE_RS05330_m5	D	-100	-76	ATAGTTTCACAATTGGCGAACTATT	6.2	1.9e-06	-13174	5721
RHE_RS18085	R	RHE_RS05330_m5	R	-29	-5	TATAGTTCCAATTTTTGGGACAGTT	10.5	1.7e-07	-15587	6770
RHE_RS05380	D	RHE_RS05380_m1	D	-304	-293	CCGCACTACTCC	13.8	1.8e-07	-15530	6745
RHE_RS30570	R	RHE_RS05380_m1	R	-87	-76	CCACACTACAAC	14.6	3.5e-08	-17168	7456
RHE_RS23665	R	RHE_RS05380_m2	R	-113	-99	GGCACCCGGCGAGAC	10.2	5.1e-06	-12186	5292
RHE_RS05380	D	RHE_RS05380_m3	D	-60	-48	TAGGTGACACATT	16.2	4.3e-09	-19265	8367
RHE_RS04645	D	RHE_RS05380_m4	D	-128	-119	TGGTTGTAGT	13.3	4.1e-07	-14707	6387
RHE_RS05380	D	RHE_RS05380_m4	D	-186	-177	CGGTTGTACT	11.9	1.2e-06	-13633	5921
RHE_RS06055	R	RHE_RS05380_m4	R	-150	-141	GAGTTGTACT	10.2	3.7e-06	-12507	5432
RHE_RS21555	D	RHE_RS05380_m4	D	-35	-26	TGATTGTACT	9.1	8.9e-06	-11629	5051
RHE_RS24975	R	RHE_RS05380_m4	R	-91	-82	TAGTTGTAGA	9.1	8.9e-06	-11629	5051
RHE_RS24980	D	RHE_RS05380_m4	D	-166	-157	TAGTTGTAGA	9.1	8.9e-06	-11629	5051
RHE_RS05380	D	RHE_RS05380_m5	D	-303	-292	CGCACTACTCCA	13.3	6.8e-08	-16504	7167
RHE_RS25905	R	RHE_RS05380_m5	R	-13	-2	TCCACTCCTCCA	11.0	2.2e-06	-13027	5658
RHE_RS27715	D	RHE_RS05380_m5	D	-100	-89	CCCACGGCTCGA	9.7	8.9e-06	-11629	5051
RHE_RS05415	R	RHE_RS05415_m1	R	-71	-44	CTCTACATTACCAATATTGGTTGGCCTA	22.7	2.0e-13	-29240	12699
RHE_RS05415	R	RHE_RS05415_m1	R	-30	-3	GTCTAGCTTATCGTATAAGAGAGGCTGG	14.7	4.6e-08	-16895	7337
RHE_RS05420	D	RHE_RS05415_m1	D	-159	-132	GTCTAGCTTATCGTATAAGAGAGGCTGG	14.7	4.6e-08	-16895	7337
RHE_RS05420	D	RHE_RS05415_m1	D	-118	-91	CTCTACATTACCAATATTGGTTGGCCTA	22.7	2.0e-13	-29240	12699
RHE_RS30745	R	RHE_RS05415_m1	R	-109	-82	CTATACCCACGGTCTAGCCTGAGGCCAA	8.5	8.6e-06	-11664	5066
RHE_RS05415	R	RHE_RS05415_m2	R	-26	-6	TAGCTTATCGTATAAGAGAGG	14.6	4.8e-08	-16852	7319
RHE_RS05420	D	RHE_RS05415_m2	D	-156	-136	TAGCTTATCGTATAAGAGAGG	14.6	4.8e-08	-16852	7319
RHE_RS27310	R	RHE_RS05415_m2	R	-70	-50	CAGCCTATTATTTCTGAGGGG	8.9	3.1e-06	-12684	5509
RHE_RS27315	D	RHE_RS05415_m2	D	-116	-96	CAGCCTATTATTTCTGAGGGG	8.9	3.1e-06	-12684	5509
RHE_RS30095	D	RHE_RS05415_m2	D	-80	-60	CCGCCTGTCGTTAGCGATAGG	15.4	2.5e-08	-17504	7602
RHE_RS05415	R	RHE_RS05415_m3	R	-39	-19	AAGAGAGGCTGGTTGTCAATT	22.4	9.2e-12	-25412	11036
RHE_RS05420	D	RHE_RS05415_m3	D	-143	-123	AAGAGAGGCTGGTTGTCAATT	22.4	9.2e-12	-25412	11036
RHE_RS05415	R	RHE_RS05415_m4	R	-26	-5	CTAGCTTATCGTATAAGAGAGG	12.8	2.7e-07	-15125	6569
RHE_RS05420	D	RHE_RS05415_m4	D	-157	-136	CTAGCTTATCGTATAAGAGAGG	12.8	2.7e-07	-15125	6569
RHE_RS05730	D	RHE_RS05415_m4	D	-189	-168	CGTGCTTATCGCCGCCGATCGG	8.7	5.5e-06	-12111	5260
RHE_RS11595	D	RHE_RS05415_m4	D	-245	-224	AGAGCATATCGCCAAAAAGCGT	8.6	5.5e-06	-12111	5260
RHE_RS27310	R	RHE_RS05415_m4	R	-70	-49	GCAGCCTATTATTTCTGAGGGG	8.2	7.1e-06	-11855	5149
RHE_RS27315	D	RHE_RS05415_m4	D	-117	-96	GCAGCCTATTATTTCTGAGGGG	8.2	7.1e-06	-11855	5149
RHE_RS30095	D	RHE_RS05415_m4	D	-81	-60	TCCGCCTGTCGTTAGCGATAGG	12.3	4.0e-07	-14732	6398
RHE_RS05495	R	RHE_RS05495_m1	R	-27	-14	TAGCTATATAGCCA	17.5	1.3e-09	-20461	8886
RHE_RS10990	R	RHE_RS05495_m1	R	-217	-204	TTACTAAATAGCCA	9.6	5.8e-06	-12058	5237
RHE_RS22790	R	RHE_RS05495_m1	R	-175	-162	TATCTAAATAGTTA	9.6	5.8e-06	-12058	5237
RHE_RS22795	D	RHE_RS05495_m1	D	-202	-189	TATCTAAATAGTTA	9.6	5.8e-06	-12058	5237
RHE_RS00415	R	RHE_RS05495_m2	R	-211	-192	TAACCAATTAGTTATTTGCG	8.0	3.7e-06	-12507	5432
RHE_RS02165	D	RHE_RS05495_m2	D	-104	-85	TAAGCAATTATCTAATTACT	6.5	9.1e-06	-11607	5041
RHE_RS05495	R	RHE_RS05495_m2	R	-41	-22	TAGCCAAATGGATATATTCG	7.1	6.3e-06	-11975	5201
RHE_RS05495	R	RHE_RS05495_m2	R	-25	-6	TCACCATTTAGCTATATAGC	24.3	2.2e-13	-29145	12658
RHE_RS11295	D	RHE_RS05495_m2	D	-83	-64	TAAGCATTTAATTCTATTAC	9.7	1.2e-06	-13633	5921
RHE_RS16825	R	RHE_RS05495_m2	R	-168	-149	TTACCAATCGGTCAAATATC	7.5	5.0e-06	-12206	5301
RHE_RS22790	R	RHE_RS05495_m2	R	-181	-162	TATCTAAATAGTTATTTTGC	11.4	3.9e-07	-14757	6409
RHE_RS22795	D	RHE_RS05495_m2	D	-202	-183	TATCTAAATAGTTATTTTGC	11.4	3.9e-07	-14757	6409
RHE_RS00415	R	RHE_RS05495_m3	R	-212	-185	TAGCTTGTAACCAATTAGTTATTTGCGC	4.9	9.5e-06	-11564	5022
RHE_RS02165	D	RHE_RS05495_m3	D	-111	-84	AATTAATTAAGCAATTATCTAATTACTT	7.0	3.1e-06	-12684	5509
RHE_RS05495	R	RHE_RS05495_m3	R	-42	-15	AGCTATATAGCCAAATGGATATATTCGT	25.4	2.8e-13	-28904	12553
RHE_RS05495	R	RHE_RS05495_m3	R	-34	-7	CACCATTTAGCTATATAGCCAAATGGAT	7.8	2.0e-06	-13122	5699
RHE_RS13800	R	RHE_RS05495_m3	R	-118	-91	CACTTTGTAGCCTACCTACTAGTTAGTA	7.4	2.6e-06	-12860	5585
RHE_RS16205	D	RHE_RS05495_m3	D	-74	-47	ATGTGCATAACAATTTTGGTATATCGTT	8.9	1.0e-06	-13816	6000
RHE_RS17645	D	RHE_RS05495_m3	D	-84	-57	ATAATTATCGCCCTATGGAACTATTCTT	5.2	8.2e-06	-11711	5086
RHE_RS18680	D	RHE_RS05495_m3	D	-70	-43	ATGTATAGAACCAATCGGTTCGATTTCT	7.5	2.3e-06	-12983	5638
RHE_RS22790	R	RHE_RS05495_m3	R	-182	-155	TATTTTGTATCTAAATAGTTATTTTGCC	12.7	9.7e-08	-16149	7013
RHE_RS22795	D	RHE_RS05495_m3	D	-209	-182	TATTTTGTATCTAAATAGTTATTTTGCC	12.7	9.7e-08	-16149	7013
RHE_RS05495	R	RHE_RS05495_m4	R	-35	-14	TAGCTATATAGCCAAATGGATA	26.6	9.9e-14	-29944	13004
RHE_RS10400	D	RHE_RS05495_m4	D	-26	-5	AAGTAATATAAATGGGAGGTTA	4.8	5.2e-06	-12167	5284
RHE_RS10990	R	RHE_RS05495_m4	R	-225	-204	TTACTAAATAGCCATGTGAGTT	5.3	4.0e-06	-12429	5398
RHE_RS22790	R	RHE_RS05495_m4	R	-191	-170	TAGTTATTTTGCCGCATGTTTA	5.8	3.1e-06	-12684	5509
RHE_RS22795	D	RHE_RS05495_m4	D	-194	-173	TAGTTATTTTGCCGCATGTTTA	5.8	3.1e-06	-12684	5509
RHE_RS29835	R	RHE_RS05495_m4	R	-51	-30	TAGATATGTAGCACGAAGGTTA	5.4	3.8e-06	-12481	5420
RHE_RS02395	R	RHE_RS05495_m5	R	-80	-53	AGATAAACTCTCTTATTTTGATTGTCAA	11.1	2.0e-06	-13122	5699
RHE_RS02400	D	RHE_RS05495_m5	D	-46	-19	AGATAAACTCTCTTATTTTGATTGTCAA	11.1	2.0e-06	-13122	5699
RHE_RS05495	R	RHE_RS05495_m5	R	-58	-31	GGATATATTCGTTGTGGGGGAATGTCAA	17.9	6.6e-11	-23441	10180
RHE_RS08955	D	RHE_RS05495_m5	D	-254	-227	TGATCTGAGCTGCTGGGGTACCTGTCAA	9.5	8.6e-06	-11664	5066
RHE_RS11740	R	RHE_RS05495_m5	R	-65	-38	CGATATGATAAACGATTATTGTTGTCAA	9.4	9.4e-06	-11575	5027
RHE_RS16510	R	RHE_RS05495_m5	R	-37	-10	CCATATCTCGGCGAGAGCTATACGTCAC	9.7	8.0e-06	-11736	5097
RHE_RS27920	D	RHE_RS05495_m5	D	-85	-58	CTATATAATTGACTGACGGATTAGTCAA	11.1	1.8e-06	-13228	5745
RHE_RS29335	R	RHE_RS05495_m5	R	-59	-32	GTATATATCATCGCTAGCGGAATCTCAA	11.1	2.0e-06	-13122	5699
RHE_RS13835	R	RHE_RS05730_m1	R	-260	-248	GATCGGCAATAAG	10.7	4.4e-06	-12334	5357
RHE_RS14170	R	RHE_RS05730_m1	R	-120	-108	AATCGGCATTACA	11.7	1.4e-06	-13479	5854
RHE_RS14175	D	RHE_RS05730_m1	D	-328	-316	AATCGGCATTACA	11.7	1.4e-06	-13479	5854
RHE_RS03275	D	RHE_RS05730_m3	D	-162	-151	GCGAAAGTAAAT	10.4	6.7e-06	-11913	5174
RHE_RS08370	R	RHE_RS05730_m3	R	-131	-120	CGGAATGTAAAG	10.9	3.6e-06	-12535	5444
RHE_RS16230	R	RHE_RS05730_m3	R	-250	-239	GAGAAAATAATC	10.2	8.7e-06	-11652	5060
RHE_RS12420	R	RHE_RS05730_m4	R	-270	-256	TATATCGACAATATC	9.4	5.1e-06	-12186	5292
RHE_RS14170	R	RHE_RS05730_m4	R	-120	-106	TGAATCGGCATTACA	9.2	5.8e-06	-12058	5237
RHE_RS14175	D	RHE_RS05730_m4	D	-330	-316	TGAATCGGCATTACA	9.2	5.8e-06	-12058	5237
RHE_RS05730	D	RHE_RS05730_m5	D	-309	-299	CGATTTGTAAG	12.0	1.5e-06	-13410	5824
RHE_RS25120	R	RHE_RS05730_m5	R	-46	-36	CGGTTTGTAAG	10.4	6.5e-06	-11944	5187
RHE_RS00340	D	RHE_RS05735_m1	D	-219	-190	GGATAAGCAAAAATACAACCGACACGTAGT	7.1	7.8e-06	-11761	5108
RHE_RS00850	R	RHE_RS05735_m1	R	-57	-28	ATATAGACAAGTATACAAGCTATACCTAGC	17.1	4.0e-09	-19337	8398
RHE_RS00855	D	RHE_RS05735_m1	D	-86	-57	ATATAGACAAGTATACAAGCTATACCTAGC	17.1	4.0e-09	-19337	8398
RHE_RS18765	R	RHE_RS05735_m1	R	-54	-25	AGATAATCAATAGGCCCGGGCTAAACCACC	6.9	9.4e-06	-11575	5027
RHE_RS05735	D	RHE_RS05735_m2	D	-26	-6	ATATGGTGACCATTGTGCTGA	17.1	4.2e-09	-19288	8377
RHE_RS10510	R	RHE_RS05735_m2	R	-127	-107	AAATAGCGGCGATTGGGTTGA	5.5	7.1e-06	-11855	5149
RHE_RS02830	D	RHE_RS05735_m3	D	-302	-273	TTCTAACGGGAGTATCTTTACCGTAGTGCC	5.4	2.5e-06	-12899	5602
RHE_RS05735	D	RHE_RS05735_m3	D	-37	-8	GTATACGGACAATATGGTGACCATTGTGCT	26.6	1.9e-13	-29292	12721
RHE_RS09045	R	RHE_RS05735_m3	R	-65	-36	CAATAATCACCGAAAAATGACGTTTGTGCA	7.2	9.7e-07	-13846	6013
RHE_RS29830	D	RHE_RS05735_m3	D	-41	-12	GTATGCGTACGGGATCATAACCATAGAGGA	5.8	2.1e-06	-13074	5678
RHE_RS05735	D	RHE_RS05735_m4	D	-45	-31	ATTATTCCGTATACG	13.6	1.5e-07	-15713	6824
RHE_RS05735	D	RHE_RS05735_m5	D	-47	-35	CAATTATTCCGTA	11.8	4.7e-07	-14571	6328
RHE_RS06680	D	RHE_RS05735_m5	D	-149	-137	TGAATATTCCGTA	10.0	6.0e-06	-12024	5222
RHE_RS05750	D	RHE_RS05750_m1	D	-45	-14	CGTGCTCTCCTTTATGCCGGCAGATTAAGCGG	32.4	7.8e-16	-34787	15108
RHE_RS16260	D	RHE_RS05750_m1	D	-207	-176	CGGGCTCTGCTTTAGCGTCGCACAGTCAGCAA	-1.1	2.7e-06	-12822	5569
RHE_RS00340	D	RHE_RS05750_m2	D	-51	-35	CTGCCATCGCTTCATGT	10.2	1.2e-06	-13633	5921
RHE_RS03000	D	RHE_RS05750_m2	D	-77	-61	ACCCCACCGATTACTTT	9.9	1.5e-06	-13410	5824
RHE_RS06065	D	RHE_RS05750_m3	D	-16	-6	TCAAGGAGAGC	11.9	1.7e-06	-13285	5770
RHE_RS27815	D	RHE_RS05750_m3	D	-16	-6	ACAAGGAGAGC	12.0	1.2e-06	-13633	5921
RHE_RS05750	D	RHE_RS05750_m4	D	-34	-16	TTATGCCGGCAGATTAAGC	14.9	2.8e-08	-17391	7553
RHE_RS14185	R	RHE_RS05750_m4	R	-52	-34	TTATGCCGCCAGACTAAGC	9.9	5.6e-06	-12093	5252
RHE_RS14190	D	RHE_RS05750_m4	D	-102	-84	TTATGCCGCCAGACTAAGC	9.9	5.6e-06	-12093	5252
RHE_RS05750	D	RHE_RS05750_m5	D	-45	-13	CGTGCTCTCCTTTATGCCGGCAGATTAAGCGGT	34.1	1.3e-16	-36579	15886
RHE_RS16260	D	RHE_RS05750_m5	D	-207	-175	CGGGCTCTGCTTTAGCGTCGCACAGTCAGCAAG	-4.2	6.3e-06	-11975	5201
RHE_RS05790	D	RHE_RS05790_m1	D	-239	-228	TTACACGCAGCC	12.1	1.3e-06	-13553	5886
RHE_RS27075	R	RHE_RS05790_m1	R	-325	-314	CCACACACATGC	10.4	5.8e-06	-12058	5237
RHE_RS05790	D	RHE_RS05790_m2	D	-338	-320	AAGAGCAAATATCTCTCCG	14.7	2.5e-08	-17504	7602
RHE_RS05790	D	RHE_RS05790_m2	D	-66	-48	TAGAGGCGAATGTGCTCGT	11.3	2.4e-06	-12940	5620
RHE_RS13235	R	RHE_RS05790_m2	R	-61	-43	GTGAGAAAAAAGTGCTCTC	9.8	6.1e-06	-12007	5215
RHE_RS13240	D	RHE_RS05790_m2	D	-94	-76	GTGAGAAAAAAGTGCTCTC	9.8	6.1e-06	-12007	5215
RHE_RS10885	R	RHE_RS05790_m3	R	-78	-65	TCCACAGCCAGCAT	9.3	7.6e-06	-11787	5119
RHE_RS10890	D	RHE_RS05790_m3	D	-175	-162	TCCACAGCCAGCAT	9.3	7.6e-06	-11787	5119
RHE_RS13675	D	RHE_RS05790_m3	D	-99	-86	GTCACTCCCGGCGT	9.4	6.1e-06	-12007	5215
RHE_RS14145	D	RHE_RS05790_m3	D	-162	-149	GACACAGTCGGCCA	9.2	9.5e-06	-11564	5022
RHE_RS17400	D	RHE_RS05790_m3	D	-252	-239	TCCACAGGCGGCGT	10.1	8.9e-07	-13932	6051
RHE_RS29825	D	RHE_RS05790_m3	D	-67	-54	GACACGGGCGGCGT	9.5	4.9e-06	-12226	5310
RHE_RS30675	R	RHE_RS05790_m3	R	-117	-104	CACACCCCCGGCTT	9.6	4.0e-06	-12429	5398
RHE_RS27075	R	RHE_RS05790_m4	R	-325	-314	CCACACACATGC	11.9	1.4e-06	-13479	5854
RHE_RS01265	D	RHE_RS05790_m5	D	-25	-15	TATAGTAGAAT	11.8	1.1e-06	-13720	5959
RHE_RS05790	D	RHE_RS05790_m5	D	-249	-239	ATTAGTAGAGT	15.2	4.3e-08	-16962	7367
RHE_RS10365	D	RHE_RS05790_m5	D	-155	-145	ACCAGTAGAGA	10.6	3.0e-06	-12717	5523
RHE_RS22625	R	RHE_RS05790_m5	R	-98	-88	TTTAGTAGATT	11.4	1.5e-06	-13410	5824
RHE_RS22630	D	RHE_RS05790_m5	D	-145	-135	TTTAGTAGATT	11.4	1.5e-06	-13410	5824
RHE_RS26875	R	RHE_RS05790_m5	R	-160	-150	AACAGTAGAGA	11.4	1.5e-06	-13410	5824
RHE_RS05815	R	RHE_RS05815_m1	R	-92	-75	TGATCAATCAACAAAAAT	16.6	7.3e-09	-18735	8137
RHE_RS05815	R	RHE_RS05815_m2	R	-94	-67	TGATTGACTGATCAATCAACAAAAATCT	24.2	3.5e-12	-26378	11456
RHE_RS05815	R	RHE_RS05815_m2	R	-90	-63	TTTTTGATTGACTGATCAATCAACAAAA	24.2	3.5e-12	-26378	11456
RHE_RS06820	D	RHE_RS05815_m2	D	-402	-375	TGTTTTGCGCATTCGTCAAAGATAAAAT	6.2	6.3e-07	-14278	6201
RHE_RS16825	R	RHE_RS05815_m2	R	-172	-145	ATGTTTACCAATCGGTCAAATATCCGCC	1.2	5.2e-06	-12167	5284
RHE_RS17400	D	RHE_RS05815_m2	D	-215	-188	TTCTTTATCAGCTGGTCAAAAAGTCCTC	0.2	7.7e-06	-11774	5114
RHE_RS18560	D	RHE_RS05815_m2	D	-82	-55	TTTTTGATCCTGCGGCCAAAAAAATAAT	1.7	4.3e-06	-12357	5367
RHE_RS24615	R	RHE_RS05815_m2	R	-275	-248	TTTTTGCTAGATACATCAATAATATATA	5.4	9.0e-07	-13921	6046
RHE_RS24620	D	RHE_RS05815_m2	D	-96	-69	TTTTTGCTAGATACATCAATAATATATA	5.4	9.0e-07	-13921	6046
RHE_RS25695	D	RHE_RS05815_m2	D	-171	-144	AATTTGAGCAATTAGTCACAAAAAAGCG	2.4	3.4e-06	-12592	5469
RHE_RS26640	D	RHE_RS05815_m2	D	-46	-19	TTGTGGATGAGCTAATCACGCAACATCC	1.9	4.0e-06	-12429	5398
RHE_RS27920	D	RHE_RS05815_m2	D	-80	-53	TAATTGACTGACGGATTAGTCAATGAAA	9.2	1.5e-07	-15713	6824
RHE_RS27920	D	RHE_RS05815_m2	D	-76	-49	TGACTGACGGATTAGTCAATGAAACTTT	10.9	6.4e-08	-16564	7194
RHE_RS05815	R	RHE_RS05815_m3	R	-91	-64	TTTTGATTGACTGATCAATCAACAAAAA	21.3	5.9e-11	-23553	10229
RHE_RS05815	R	RHE_RS05815_m3	R	-87	-60	TTATTTTTGATTGACTGATCAATCAACA	27.0	8.1e-14	-30144	13092
RHE_RS05815	R	RHE_RS05815_m3	R	-83	-56	CATATTATTTTTGATTGACTGATCAATC	9.4	2.0e-07	-15425	6699
RHE_RS15925	D	RHE_RS05815_m3	D	-135	-108	ACGACTATTTCTGATCGATCGATCAATT	6.2	1.0e-06	-13816	6000
RHE_RS27920	D	RHE_RS05815_m3	D	-83	-56	ATATAATTGACTGACGGATTAGTCAATG	12.4	4.0e-08	-17034	7398
RHE_RS27920	D	RHE_RS05815_m3	D	-79	-52	AATTGACTGACGGATTAGTCAATGAAAC	3.9	3.0e-06	-12717	5523
RHE_RS01720	R	RHE_RS05815_m4	R	-88	-71	ATTCAGGCAATAAAAAAG	9.4	7.3e-06	-11828	5137
RHE_RS05815	R	RHE_RS05815_m4	R	-93	-76	GATCAATCAACAAAAATC	16.9	1.5e-09	-20318	8824
RHE_RS16420	R	RHE_RS05815_m4	R	-96	-79	CATCATCCAATAAATATA	10.1	4.2e-06	-12380	5377
RHE_RS18665	R	RHE_RS05815_m4	R	-60	-43	CGTAAATCAAAAAAAACC	10.4	3.2e-06	-12652	5495
RHE_RS07935	R	RHE_RS05815_m5	R	-19	-10	CCACCTCCTG	11.2	1.7e-06	-13285	5770
RHE_RS13970	D	RHE_RS05815_m5	D	-201	-192	CCACCTCCCC	10.5	9.2e-06	-11596	5036
RHE_RS15590	D	RHE_RS05815_m5	D	-98	-89	CCACCTCCTG	11.2	1.7e-06	-13285	5770
RHE_RS05855	R	RHE_RS05855_m1	R	-79	-67	AATATCGTGCATT	12.6	5.3e-07	-14450	6276
RHE_RS17145	D	RHE_RS05855_m1	D	-52	-40	ATAATCGTGCATT	10.0	7.3e-06	-11828	5137
RHE_RS05855	R	RHE_RS05855_m2	R	-61	-39	ATTGCACGAAATGACTCGACATT	18.1	1.2e-09	-20541	8921
RHE_RS05855	R	RHE_RS05855_m2	R	-41	-19	AATGAACGAGGTGGCATGATATT	12.9	2.5e-07	-15202	6602
RHE_RS10750	R	RHE_RS05855_m2	R	-52	-30	AGTGCATGATTCATCGCGAGATT	9.4	3.3e-06	-12622	5481
RHE_RS22790	R	RHE_RS05855_m2	R	-157	-135	AATACATGAAAAATAATGATTAT	7.8	9.2e-06	-11596	5036
RHE_RS22795	D	RHE_RS05855_m2	D	-229	-207	AATACATGAAAAATAATGATTAT	7.8	9.2e-06	-11596	5036
RHE_RS24540	D	RHE_RS05855_m2	D	-46	-24	TTTGCATGATATCTCCAGAATAT	13.5	1.5e-07	-15713	6824
RHE_RS27580	D	RHE_RS05855_m2	D	-144	-122	AATGCATGGGTTTCCATGAGTTG	9.7	2.7e-06	-12822	5569
RHE_RS05855	R	RHE_RS05855_m3	R	-61	-39	ATTGCACGAAATGACTCGACATT	19.7	1.4e-10	-22689	9854
RHE_RS05855	R	RHE_RS05855_m3	R	-51	-29	GTGGCATGATATTGCACGAAATG	12.3	3.7e-07	-14810	6432
RHE_RS05855	R	RHE_RS05855_m3	R	-31	-9	TCCGCACGAAAATGAACGAGGTG	10.6	1.3e-06	-13553	5886
RHE_RS22790	R	RHE_RS05855_m3	R	-157	-135	AATACATGAAAAATAATGATTAT	8.5	5.4e-06	-12129	5268
RHE_RS22795	D	RHE_RS05855_m3	D	-229	-207	AATACATGAAAAATAATGATTAT	8.5	5.4e-06	-12129	5268
RHE_RS24540	D	RHE_RS05855_m3	D	-46	-24	TTTGCATGATATCTCCAGAATAT	9.5	2.8e-06	-12786	5553
RHE_RS27580	D	RHE_RS05855_m3	D	-144	-122	AATGCATGGGTTTCCATGAGTTG	8.5	5.4e-06	-12129	5268
RHE_RS05855	R	RHE_RS05855_m4	R	-75	-65	TAAATATCGTG	12.2	7.6e-07	-14090	6119
RHE_RS25035	R	RHE_RS05855_m4	R	-71	-61	GGAATGTCGTG	11.6	3.1e-06	-12684	5509
RHE_RS01345	R	RHE_RS05855_m5	R	-90	-79	CAGAAAATGCAT	10.3	5.1e-06	-12186	5292
RHE_RS01350	D	RHE_RS05855_m5	D	-49	-38	CAGAAAATGCAT	10.3	5.1e-06	-12186	5292
RHE_RS04105	D	RHE_RS05855_m5	D	-209	-198	CCGAAAATGCAA	10.8	3.9e-06	-12455	5409
RHE_RS25640	D	RHE_RS05855_m5	D	-59	-48	GGGAAAATGCAC	11.0	2.8e-06	-12786	5553
RHE_RS23130	D	RHE_RS05915_m1	D	-193	-175	GTGTTAAGTTAGGTAAAAC	9.8	5.5e-06	-12111	5260
RHE_RS25035	R	RHE_RS05915_m1	R	-107	-89	GATTTAATCATACTAATGC	10.0	4.4e-06	-12334	5357
RHE_RS28880	R	RHE_RS05915_m1	R	-210	-192	GTTTTCATTCACCTAAATC	9.3	9.1e-06	-11607	5041
RHE_RS25120	R	RHE_RS05915_m2	R	-106	-75	TTCCCTACAGCATCGGCCCGACAATCGCGATC	-1.0	2.4e-06	-12940	5620
RHE_RS31005	D	RHE_RS05915_m2	D	-154	-123	ACGTCTATCGTAACTATGCGGCCTACTTAATT	-4.3	8.4e-06	-11687	5076
RHE_RS05915	D	RHE_RS05915_m3	D	-16	-4	TATAGAAAAACTA	18.9	1.8e-09	-20135	8745
RHE_RS11520	R	RHE_RS05915_m3	R	-153	-141	TTTAGAAAAGCTG	10.9	6.0e-07	-14326	6222
RHE_RS11860	R	RHE_RS05915_m3	R	-217	-205	TAAAGAAAAACTC	9.4	1.7e-06	-13285	5770
RHE_RS24570	D	RHE_RS05915_m3	D	-155	-143	TTTAGAAAATATT	8.1	3.2e-06	-12652	5495
RHE_RS09390	D	RHE_RS05915_m4	D	-254	-236	TAAATAGTATGACTAATTG	9.6	8.1e-06	-11724	5092
RHE_RS09390	D	RHE_RS05915_m5	D	-254	-236	TAAATAGTATGACTAATTG	9.6	8.1e-06	-11724	5092
RHE_RS05945	R	RHE_RS05945_m1	R	-364	-348	GTTAATGGATACTTAAA	16.1	4.6e-09	-19197	8337
RHE_RS07685	D	RHE_RS05945_m1	D	-114	-98	GGTAAGGCTCCATTAAG	9.4	7.2e-06	-11841	5143
RHE_RS12585	D	RHE_RS05945_m1	D	-381	-365	GTAAATTTTTCTTTAAA	10.0	4.6e-06	-12289	5337
RHE_RS15090	R	RHE_RS05945_m1	R	-137	-121	TTTAAAGTCTGATTAAC	11.2	1.8e-06	-13228	5745
RHE_RS24090	D	RHE_RS05945_m1	D	-145	-129	GTTAACAATACCTTAAA	11.4	1.5e-06	-13410	5824
RHE_RS24570	D	RHE_RS05945_m1	D	-241	-225	GTGAATAGATATTTAAA	9.4	7.2e-06	-11841	5143
RHE_RS05315	R	RHE_RS05945_m2	R	-80	-61	AACTTAACGATTGGTAAGGG	11.4	5.1e-07	-14489	6292
RHE_RS05945	R	RHE_RS05945_m2	R	-189	-170	TGCTTAACAGACAGTAAATG	15.3	3.5e-08	-17168	7456
RHE_RS06395	R	RHE_RS05945_m2	R	-147	-128	GCTTTTACATCTATTAAGGG	8.0	4.1e-06	-12405	5387
RHE_RS07845	R	RHE_RS05945_m2	R	-211	-192	TCTTTACTCTTCGTTAACCA	11.0	6.6e-07	-14231	6180
RHE_RS13800	R	RHE_RS05945_m2	R	-122	-103	TACCTACTAGTTAGTAGACA	9.8	1.4e-06	-13479	5854
RHE_RS14605	R	RHE_RS05945_m2	R	-266	-247	AGTTTAACAAAGGGTTAGCG	9.6	1.7e-06	-13285	5770
RHE_RS17050	D	RHE_RS05945_m2	D	-286	-267	GATTTAAGGGTCGGTAAATG	8.5	3.0e-06	-12717	5523
RHE_RS05945	R	RHE_RS05945_m3	R	-365	-345	GCGGTTAATGGATACTTAAAG	21.8	5.3e-13	-28266	12276
RHE_RS17400	D	RHE_RS05945_m3	D	-130	-110	ATGGTTAATCGAGGATTAAGT	6.9	9.5e-06	-11564	5022
RHE_RS05465	R	RHE_RS05945_m4	R	-135	-112	GAAATGTGGTTCTCTCTTAAAGAT	10.6	2.9e-06	-12751	5538
RHE_RS11445	D	RHE_RS05945_m4	D	-78	-55	TAAATTCTTTAAATTCAGTAAAAT	9.8	5.6e-06	-12093	5252
RHE_RS27415	D	RHE_RS05945_m4	D	-87	-64	AAAATCAGTTCAATTGACAATGCC	10.5	3.1e-06	-12684	5509
RHE_RS05945	R	RHE_RS05945_m5	R	-382	-359	CTTAAAGAATTTGATGGATTTTAT	23.6	7.5e-13	-27919	12125
RHE_RS05945	R	RHE_RS05945_m5	R	-205	-182	AGTAAATGCGCCGTCCGGTTTTCG	12.5	1.2e-07	-15936	6921
RHE_RS27305	R	RHE_RS05945_m5	R	-157	-134	CTTAACGGAACTCTACAGTTCTAT	9.2	9.2e-07	-13899	6036
RHE_RS06015	R	RHE_RS06015_m1	R	-82	-60	TGCGTACAATTTAATTGTGCGTT	19.1	5.4e-10	-21339	9268
RHE_RS06015	R	RHE_RS06015_m1	R	-67	-45	TTTGCGAAATTCACTTGCGTACA	17.1	4.8e-09	-19155	8319
RHE_RS06015	R	RHE_RS06015_m2	R	-87	-70	TTAATTGTGCGTTAGTAA	9.4	4.5e-06	-12311	5347
RHE_RS06015	R	RHE_RS06015_m2	R	-72	-55	TCACTTGCGTACAATTTA	14.6	6.4e-08	-16564	7194
RHE_RS06495	R	RHE_RS06015_m2	R	-363	-346	TCTATTTTACAAAATATC	9.2	5.2e-06	-12167	5284
RHE_RS15870	R	RHE_RS06015_m2	R	-91	-74	CAAATTGCACAAAATAAA	12.0	6.7e-07	-14216	6174
RHE_RS17135	D	RHE_RS06015_m2	D	-118	-101	TGCATTTTGTACAAAAAA	8.8	6.7e-06	-11913	5174
RHE_RS23635	R	RHE_RS06015_m2	R	-85	-68	TATTTTGCACAAAATATG	8.7	7.1e-06	-11855	5149
RHE_RS23635	R	RHE_RS06015_m2	R	-83	-66	ATTATTTTGCACAAAATA	12.2	5.7e-07	-14378	6244
RHE_RS23640	D	RHE_RS06015_m2	D	-102	-85	ATTATTTTGCACAAAATA	12.2	5.7e-07	-14378	6244
RHE_RS23640	D	RHE_RS06015_m2	D	-100	-83	TATTTTGCACAAAATATG	8.7	7.1e-06	-11855	5149
RHE_RS23885	D	RHE_RS06015_m2	D	-45	-28	ATAATTGGGTACAATGTG	9.5	4.2e-06	-12380	5377
RHE_RS03645	R	RHE_RS06015_m3	R	-129	-107	CGACTTGTGCGCCGCACAATTTA	10.2	3.4e-06	-12592	5469
RHE_RS04310	D	RHE_RS06015_m3	D	-110	-88	TCCATTATTTGGAACTTAATTTG	9.6	5.5e-06	-12111	5260
RHE_RS06015	R	RHE_RS06015_m3	R	-77	-55	TCACTTGCGTACAATTTAATTGT	14.0	9.5e-08	-16169	7022
RHE_RS06015	R	RHE_RS06015_m3	R	-72	-50	GAAATTCACTTGCGTACAATTTA	10.8	2.1e-06	-13074	5678
RHE_RS11340	R	RHE_RS06015_m3	R	-57	-35	AATATTGACTTTTACGTAATAGT	12.3	5.4e-07	-14432	6268
RHE_RS15890	D	RHE_RS06015_m3	D	-102	-80	ACGATTATTTATCGCACATTTTA	9.2	7.4e-06	-11814	5131
RHE_RS18795	D	RHE_RS06015_m3	D	-138	-116	AATATTAGAACGAATATAATATT	8.9	9.2e-06	-11596	5036
RHE_RS25795	R	RHE_RS06015_m3	R	-206	-184	AAAAATATGAATTACATAATTGT	11.2	1.5e-06	-13410	5824
RHE_RS25800	D	RHE_RS06015_m3	D	-47	-25	AAAAATATGAATTACATAATTGT	11.2	1.5e-06	-13410	5824
RHE_RS06015	R	RHE_RS06015_m4	R	-87	-64	TACAATTTAATTGTGCGTTAGTAA	14.2	4.3e-08	-16962	7367
RHE_RS06015	R	RHE_RS06015_m4	R	-72	-49	CGAAATTCACTTGCGTACAATTTA	18.8	7.7e-10	-20985	9114
RHE_RS13150	D	RHE_RS06015_m4	D	-396	-373	AACAATATAATCGAGGGCAAAATA	7.2	3.9e-06	-12455	5409
RHE_RS15890	D	RHE_RS06015_m4	D	-103	-80	CACGATTATTTATCGCACATTTTA	13.0	1.0e-07	-16118	7000
RHE_RS15890	D	RHE_RS06015_m4	D	-45	-22	TGCGATTATTTATCGCGCGATATA	6.4	6.0e-06	-12024	5222
RHE_RS19065	D	RHE_RS06015_m4	D	-126	-103	GACAATAAACTTGTGAAAAATCCG	7.3	3.7e-06	-12507	5432
RHE_RS20460	D	RHE_RS06015_m4	D	-163	-140	CATGATTATATCTCGCAACAATTT	7.1	4.1e-06	-12405	5387
RHE_RS22460	R	RHE_RS06015_m4	R	-96	-73	AAAAATTTAACCATGCCCAAATAA	7.4	3.5e-06	-12563	5456
RHE_RS23635	R	RHE_RS06015_m4	R	-85	-62	GAAGATTATTTTGCACAAAATATG	10.7	4.9e-07	-14529	6310
RHE_RS23640	D	RHE_RS06015_m4	D	-106	-83	GAAGATTATTTTGCACAAAATATG	10.7	4.9e-07	-14529	6310
RHE_RS02165	D	RHE_RS06015_m5	D	-93	-79	CTAATTACTTTGCGC	11.7	1.4e-06	-13479	5854
RHE_RS02385	D	RHE_RS06015_m5	D	-111	-97	ACATTTGCATTGTGC	9.3	7.1e-06	-11855	5149
RHE_RS06015	R	RHE_RS06015_m5	R	-79	-65	ACAATTTAATTGTGC	14.1	1.1e-07	-16023	6959
RHE_RS06015	R	RHE_RS06015_m5	R	-64	-50	GAAATTCACTTGCGT	11.5	1.5e-06	-13410	5824
RHE_RS18690	D	RHE_RS06015_m5	D	-56	-42	GCCATTACATTGCGC	10.3	4.0e-06	-12429	5398
RHE_RS06025	R	RHE_RS06025_m1	R	-26	-13	TATTGATATCAATG	15.8	3.0e-08	-17322	7523
RHE_RS06030	D	RHE_RS06025_m1	D	-79	-66	TATTGATATCAATG	15.8	3.0e-08	-17322	7523
RHE_RS01410	R	RHE_RS06025_m2	R	-38	-17	AGTAGATATCTTGACGTCAAGA	7.4	4.5e-06	-12311	5347
RHE_RS06025	R	RHE_RS06025_m2	R	-26	-5	TCTATTTCTATTGATATCAATG	16.7	6.9e-09	-18792	8161
RHE_RS06030	D	RHE_RS06025_m2	D	-87	-66	TCTATTTCTATTGATATCAATG	16.7	6.9e-09	-18792	8161
RHE_RS15410	R	RHE_RS06025_m2	R	-131	-110	TTGAAAAACCAAGATAAAAATG	6.5	7.3e-06	-11828	5137
RHE_RS16205	D	RHE_RS06025_m2	D	-81	-60	AGTGGTAATGTGCATAACAATT	7.4	4.5e-06	-12311	5347
RHE_RS18680	D	RHE_RS06025_m2	D	-91	-70	CTGTTTTATCGTCATATCAAGA	8.3	2.8e-06	-12786	5553
RHE_RS20490	D	RHE_RS06025_m2	D	-115	-94	TCGTTTACCGTTTATTTCAACA	6.0	9.4e-06	-11575	5027
RHE_RS23080	R	RHE_RS06025_m2	R	-58	-37	CTTAATAGTGTTGGTAACAAGA	11.2	4.9e-07	-14529	6310
RHE_RS30095	D	RHE_RS06025_m2	D	-187	-166	CGGAGTTCCATATATAACAATG	6.3	8.1e-06	-11724	5092
RHE_RS11520	R	RHE_RS06025_m3	R	-26	-17	CGCTTGACGA	10.5	7.2e-06	-11841	5143
RHE_RS24660	D	RHE_RS06025_m3	D	-134	-125	CCCTTGACGA	10.0	9.8e-06	-11533	5009
RHE_RS26015	R	RHE_RS06025_m4	R	-38	-11	TCGTAGTGTATTTATGTCGTTATCAGTG	-6.9	7.7e-06	-11774	5114
RHE_RS01410	R	RHE_RS06025_m5	R	-38	-17	AGTAGATATCTTGACGTCAAGA	5.8	8.1e-06	-11724	5092
RHE_RS02490	R	RHE_RS06025_m5	R	-85	-64	ACGATTTTTATCGATAAAAAAC	6.6	5.2e-06	-12167	5284
RHE_RS06025	R	RHE_RS06025_m5	R	-32	-11	TCTATTGATATCAATGTATTTA	5.9	7.6e-06	-11787	5119
RHE_RS06025	R	RHE_RS06025_m5	R	-26	-5	TCTATTTCTATTGATATCAATG	17.9	1.8e-09	-20135	8745
RHE_RS06030	D	RHE_RS06025_m5	D	-87	-66	TCTATTTCTATTGATATCAATG	17.9	1.8e-09	-20135	8745
RHE_RS06030	D	RHE_RS06025_m5	D	-81	-60	TCTATTGATATCAATGTATTTA	5.9	7.6e-06	-11787	5119
RHE_RS12760	D	RHE_RS06025_m5	D	-231	-210	ACTATATTCATCGAATTCAATA	7.8	2.7e-06	-12822	5569
RHE_RS15405	R	RHE_RS06025_m5	R	-75	-54	GTCAGTAATATTGACGTAAATC	8.7	1.6e-06	-13346	5796
RHE_RS22260	R	RHE_RS06025_m5	R	-93	-72	GTCATAGATGATGAAGTCAATA	5.6	8.9e-06	-11629	5051
RHE_RS23080	R	RHE_RS06025_m5	R	-58	-37	CTTAATAGTGTTGGTAACAAGA	6.4	5.8e-06	-12058	5237
RHE_RS26015	R	RHE_RS06025_m5	R	-38	-17	TGTATTTATGTCGTTATCAGTG	8.3	2.0e-06	-13122	5699
RHE_RS06105	R	RHE_RS06105_m1	R	-64	-50	AGCAGATTATCAAAG	12.8	3.3e-07	-14924	6481
RHE_RS06105	R	RHE_RS06105_m1	R	-23	-9	CTCGGATTATCCGCT	13.0	2.2e-07	-15330	6658
RHE_RS14170	R	RHE_RS06105_m1	R	-17	-3	GGCGGATTATCCATT	10.9	3.6e-06	-12535	5444
RHE_RS32675	R	RHE_RS06105_m1	R	-222	-208	CAAGGATTATCCACT	10.6	4.7e-06	-12268	5328
RHE_RS06105	R	RHE_RS06105_m2	R	-38	-10	TCGGATTATCCGCTCAGAGTTGATGATCC	23.5	1.5e-12	-27226	11824
RHE_RS29830	D	RHE_RS06105_m2	D	-313	-285	ATCCATCACCTCCTGTCCTCCGATAGTCT	8.7	2.1e-06	-13074	5678
RHE_RS06105	R	RHE_RS06105_m3	R	-40	-10	TCGGATTATCCGCTCAGAGTTGATGATCCTT	29.5	6.2e-15	-32714	14208
RHE_RS23915	R	RHE_RS06105_m3	R	-232	-202	CGGCATTATCCGCTGACGGCAGCTGTTCGGA	4.6	1.3e-06	-13553	5886
RHE_RS23920	D	RHE_RS06105_m3	D	-86	-56	CGGCATTATCCGCTGACGGCAGCTGTTCGGA	4.6	1.3e-06	-13553	5886
RHE_RS06105	R	RHE_RS06105_m4	R	-133	-124	ACGAAGGAAA	10.5	3.7e-06	-12507	5432
RHE_RS28010	D	RHE_RS06105_m4	D	-50	-41	ACGAAGGAAA	10.5	3.7e-06	-12507	5432
RHE_RS06105	R	RHE_RS06105_m5	R	-58	-29	TTGATGATCCTTCCCGATTTAAGCAGATTA	25.0	4.3e-13	-28475	12367
RHE_RS26150	D	RHE_RS06105_m5	D	-106	-77	GTGAAGATATTTTCTTTTTAGTCAACATCA	4.0	9.0e-06	-11618	5046
RHE_RS06135	D	RHE_RS06135_m1	D	-65	-54	ACATCTGTACTG	11.1	4.3e-06	-12357	5367
RHE_RS20810	D	RHE_RS06135_m1	D	-98	-87	CCATCGATACAG	12.0	8.6e-07	-13966	6066
RHE_RS06405	D	RHE_RS06135_m2	D	-108	-98	TTCGAAACAGA	11.0	4.7e-06	-12268	5328
RHE_RS20810	D	RHE_RS06135_m2	D	-96	-86	ATCGATACAGT	12.4	1.9e-07	-15476	6721
RHE_RS03645	R	RHE_RS06135_m4	R	-145	-126	TTTATGTTGCAATGCACAAT	9.3	4.6e-06	-12289	5337
RHE_RS06135	D	RHE_RS06135_m4	D	-24	-5	TTAATGCGAGACGGTACAAA	8.8	6.2e-06	-11991	5208
RHE_RS32825	R	RHE_RS06135_m4	R	-50	-31	ACTATCCTAATATGTACACT	10.4	2.3e-06	-12983	5638
RHE_RS06135	D	RHE_RS06135_m5	D	-13	-2	CGGTACAAAATA	11.4	1.5e-06	-13410	5824
RHE_RS24475	R	RHE_RS06135_m5	R	-41	-30	CAGCACAAAATT	9.7	7.4e-06	-11814	5131
RHE_RS25795	R	RHE_RS06135_m5	R	-189	-178	TGTTACAAAAAT	10.2	4.7e-06	-12268	5328
RHE_RS25800	D	RHE_RS06135_m5	D	-53	-42	TGTTACAAAAAT	10.2	4.7e-06	-12268	5328
RHE_RS26495	R	RHE_RS06135_m5	R	-81	-70	CAGTATAAAACT	12.4	6.2e-07	-14294	6208
RHE_RS28160	R	RHE_RS06135_m5	R	-55	-44	CTATATAAAAAT	9.9	6.2e-06	-11991	5208
RHE_RS28165	D	RHE_RS06135_m5	D	-275	-264	CTATATAAAAAT	9.9	6.2e-06	-11991	5208
RHE_RS12760	D	RHE_RS06175_m1	D	-392	-378	CCCCAACTGATAACG	9.4	3.0e-06	-12717	5523
RHE_RS27845	R	RHE_RS06175_m1	R	-141	-127	CGGCAACTGACATGG	9.5	2.9e-06	-12751	5538
RHE_RS06175	R	RHE_RS06175_m2	R	-49	-22	CGCTCCTGACAATACACTGTCAGTTGGG	29.9	5.2e-15	-32890	14284
RHE_RS09445	D	RHE_RS06175_m2	D	-41	-14	CGCTACTCACCGGTTGGTGACAGCGGGG	-5.9	7.2e-06	-11841	5143
RHE_RS25455	R	RHE_RS06175_m2	R	-172	-145	TGCCCCGGAGACGGTGCTTTCAGTTGCT	-4.7	4.7e-06	-12268	5328
RHE_RS06175	R	RHE_RS06175_m3	R	-49	-22	CGCTCCTGACAATACACTGTCAGTTGGG	29.9	5.2e-15	-32890	14284
RHE_RS09445	D	RHE_RS06175_m3	D	-41	-14	CGCTACTCACCGGTTGGTGACAGCGGGG	-5.9	7.2e-06	-11841	5143
RHE_RS25455	R	RHE_RS06175_m3	R	-172	-145	TGCCCCGGAGACGGTGCTTTCAGTTGCT	-4.7	4.7e-06	-12268	5328
RHE_RS06175	R	RHE_RS06175_m4	R	-34	-10	CTCCCACCCTCACGCTCCTGACAAT	3.9	3.6e-06	-12535	5444
RHE_RS15090	R	RHE_RS06175_m4	R	-26	-2	TTTATATCGTCGCCTTCCTGACGCT	6.0	1.3e-06	-13553	5886
RHE_RS01720	R	RHE_RS06175_m5	R	-314	-290	CGTGTCAGATGCAAGTAGAAATACC	9.4	9.6e-07	-13856	6018
RHE_RS04225	R	RHE_RS06175_m5	R	-81	-57	TCTGGCAGTAGCGTTCGCGTTTCGA	8.1	2.0e-06	-13122	5699
RHE_RS06175	R	RHE_RS06175_m5	R	-61	-37	ACTGTCAGTTGGGTTTGCGTATAGA	26.5	3.2e-15	-33376	14495
RHE_RS10400	D	RHE_RS06175_m5	D	-52	-28	ATTTTCAGTAGTATTATCCCATAAA	7.1	3.5e-06	-12563	5456
RHE_RS19670	R	RHE_RS06175_m5	R	-131	-107	ATTGTCAGGAAGGAAGACGTGGAAA	5.4	8.4e-06	-11687	5076
RHE_RS21540	D	RHE_RS06175_m5	D	-148	-124	GGTGGCAGGTGACGGGATATATAGC	6.2	5.6e-06	-12093	5252
RHE_RS26015	R	RHE_RS06175_m5	R	-115	-91	CTTGTCAGGTGGTTTTCCCGCGACG	6.5	4.8e-06	-12247	5319
RHE_RS12585	D	RHE_RS06215_m1	D	-266	-255	CAATGAAATGTA	9.9	7.9e-06	-11749	5102
RHE_RS19750	R	RHE_RS06215_m1	R	-87	-76	TAATGAAATGTC	10.1	4.8e-06	-12247	5319
RHE_RS06210	R	RHE_RS06215_m2	R	-125	-114	TTTCTCCCAAAA	11.5	1.1e-06	-13720	5959
RHE_RS06210	R	RHE_RS06215_m2	R	-39	-28	GCTCTCCCAAGC	11.3	1.9e-06	-13174	5721
RHE_RS06215	D	RHE_RS06215_m2	D	-137	-126	GCTCTCCCAAGC	11.3	1.9e-06	-13174	5721
RHE_RS06215	D	RHE_RS06215_m2	D	-51	-40	TTTCTCCCAAAA	11.5	1.1e-06	-13720	5959
RHE_RS06210	R	RHE_RS06215_m3	R	-127	-111	ATTTTTCTCCCAAAAAC	19.4	1.3e-10	-22763	9886
RHE_RS06215	D	RHE_RS06215_m3	D	-54	-38	ATTTTTCTCCCAAAAAC	19.4	1.3e-10	-22763	9886
RHE_RS29615	R	RHE_RS06215_m3	R	-85	-69	ATTTTTCTCCGAGAAGC	9.4	5.4e-06	-12129	5268
RHE_RS33115	R	RHE_RS06215_m3	R	-49	-33	GATTTGCTCCCAAAACG	9.5	5.0e-06	-12206	5301
RHE_RS04340	D	RHE_RS06215_m4	D	-18	-7	TAATGAGAGATT	10.4	3.3e-06	-12622	5481
RHE_RS06210	R	RHE_RS06215_m4	R	-29	-18	AGATGAGAGAGC	9.9	9.3e-06	-11585	5032
RHE_RS06215	D	RHE_RS06215_m4	D	-147	-136	AGATGAGAGAGC	9.9	9.3e-06	-11585	5032
RHE_RS18865	R	RHE_RS06215_m4	R	-187	-176	AAATGGGAGAGT	10.1	6.8e-06	-11899	5167
RHE_RS20580	D	RHE_RS06215_m4	D	-17	-6	TTTTGGGAGATC	9.9	9.3e-06	-11585	5032
RHE_RS30775	R	RHE_RS06215_m4	R	-172	-161	TCATGAGAGATT	10.2	5.7e-06	-12075	5244
RHE_RS05315	R	RHE_RS06215_m5	R	-239	-226	GAAAAACTCTCATC	9.4	9.0e-06	-11618	5046
RHE_RS06210	R	RHE_RS06215_m5	R	-134	-121	CAAAAACTCTCATA	12.7	4.0e-07	-14732	6398
RHE_RS06215	D	RHE_RS06215_m5	D	-44	-31	CAAAAACTCTCATA	12.7	4.0e-07	-14732	6398
RHE_RS15160	R	RHE_RS06215_m5	R	-116	-103	CTAAACGGCTCATT	10.4	3.9e-06	-12455	5409
RHE_RS00340	D	RHE_RS06405_m1	D	-300	-280	CAAAAAATATTACAATTTGTA	9.5	5.8e-06	-12058	5237
RHE_RS06405	D	RHE_RS06405_m1	D	-335	-315	CAAGAAAAACGACAAATAATA	12.8	3.1e-07	-14987	6509
RHE_RS10400	D	RHE_RS06405_m1	D	-35	-15	CCCATAAAAAAGTAATATAAA	10.8	2.0e-06	-13122	5699
RHE_RS10400	D	RHE_RS06405_m1	D	-34	-14	CCATAAAAAAGTAATATAAAT	14.5	5.2e-08	-16772	7284
RHE_RS10400	D	RHE_RS06405_m1	D	-33	-13	CATAAAAAAGTAATATAAATG	9.6	5.8e-06	-12058	5237
RHE_RS17200	R	RHE_RS06405_m1	R	-94	-74	ACAACAAAATAGCTAATATTT	9.3	6.8e-06	-11899	5167
RHE_RS18560	D	RHE_RS06405_m1	D	-66	-46	CAAAAAAATAATTGAACAAAA	9.2	7.4e-06	-11814	5131
RHE_RS18560	D	RHE_RS06405_m1	D	-65	-45	AAAAAAATAATTGAACAAAAC	9.6	5.4e-06	-12129	5268
RHE_RS24090	D	RHE_RS06405_m1	D	-138	-118	ATACCTTAAATCAAAAAAATC	8.9	9.3e-06	-11585	5032
RHE_RS01655	R	RHE_RS06405_m2	R	-68	-48	AAAATTATATAAAGATAGAAA	9.4	7.6e-06	-11787	5119
RHE_RS01660	D	RHE_RS06405_m2	D	-69	-49	AAAATTATATAAAGATAGAAA	9.4	7.6e-06	-11787	5119
RHE_RS05255	R	RHE_RS06405_m2	R	-27	-7	TAAATTATACCCTAAAAAAAG	12.8	3.0e-07	-15019	6523
RHE_RS10400	D	RHE_RS06405_m2	D	-43	-23	AGTATTATCCCATAAAAAAGT	9.3	8.3e-06	-11699	5081
RHE_RS17830	R	RHE_RS06405_m2	R	-54	-34	ATCATTATGTTATAAAAATAT	9.5	7.0e-06	-11870	5155
RHE_RS17835	D	RHE_RS06405_m2	D	-26	-6	ATCATTATGTTATAAAAATAT	9.5	7.0e-06	-11870	5155
RHE_RS19750	R	RHE_RS06405_m2	R	-95	-75	GTAATGAAATGTCAAAAAAGG	10.0	4.5e-06	-12311	5347
RHE_RS21310	D	RHE_RS06405_m2	D	-118	-98	AAAATAAAAAATCGAAAATCC	10.6	2.6e-06	-12860	5585
RHE_RS22790	R	RHE_RS06405_m2	R	-149	-129	AGATTAAATACATGAAAAATA	10.4	3.1e-06	-12684	5509
RHE_RS22795	D	RHE_RS06405_m2	D	-235	-215	AGATTAAATACATGAAAAATA	10.4	3.1e-06	-12684	5509
RHE_RS24615	R	RHE_RS06405_m2	R	-173	-153	GAAATAAGATTAAAAAATATG	9.7	5.9e-06	-12041	5229
RHE_RS24620	D	RHE_RS06405_m2	D	-191	-171	GAAATAAGATTAAAAAATATG	9.7	5.9e-06	-12041	5229
RHE_RS00185	R	RHE_RS06405_m3	R	-231	-206	ATTAATTATTTGATATTACTATATTT	9.8	6.8e-06	-11899	5167
RHE_RS00185	R	RHE_RS06405_m3	R	-223	-198	TTAAATCGATTAATTATTTGATATTA	10.1	5.0e-06	-12206	5301
RHE_RS00185	R	RHE_RS06405_m3	R	-216	-191	AACAAATTTAAATCGATTAATTATTT	9.8	6.8e-06	-11899	5167
RHE_RS00185	R	RHE_RS06405_m3	R	-203	-178	TTAAAAAGAACGAAACAAATTTAAAT	9.7	7.5e-06	-11801	5125
RHE_RS02230	D	RHE_RS06405_m3	D	-100	-75	TAAATATTAGAAATCTAACTTTAATC	9.5	9.1e-06	-11607	5041
RHE_RS02385	D	RHE_RS06405_m3	D	-159	-134	TTTAAATCGAAAATTTATCATTATTT	9.6	8.3e-06	-11699	5081
RHE_RS06635	R	RHE_RS06405_m3	R	-120	-95	TAAAAATCCGTTAACTATTTATATTT	14.3	2.2e-08	-17632	7658
RHE_RS06635	R	RHE_RS06405_m3	R	-118	-93	GGTAAAAATCCGTTAACTATTTATAT	9.8	7.5e-06	-11801	5125
RHE_RS06680	D	RHE_RS06405_m3	D	-139	-114	GTAATATTCAAATTATACTAATATAG	13.4	8.8e-08	-16246	7056
RHE_RS09045	R	RHE_RS06405_m3	R	-41	-16	GAAAAAAATAATAGGTAACGCAATAA	9.6	8.3e-06	-11699	5081
RHE_RS09225	D	RHE_RS06405_m3	D	-54	-29	CAAAAAAATGAAATGAACTTGTATTT	12.2	4.5e-07	-14614	6347
RHE_RS09265	D	RHE_RS06405_m3	D	-161	-136	ATAAAATTTTATTAACCAGATTTTTT	10.3	4.5e-06	-12311	5347
RHE_RS09390	D	RHE_RS06405_m3	D	-255	-230	GTAAATAGTATGACTAATTGATATTT	13.3	1.0e-07	-16118	7000
RHE_RS09505	D	RHE_RS06405_m3	D	-170	-145	ATAAAACACCTCGATAAGATCTATTA	11.6	9.5e-07	-13867	6022
RHE_RS10680	D	RHE_RS06405_m3	D	-80	-55	AAAAAAAGCGATTTACAAAAGTAATA	11.7	8.4e-07	-13990	6076
RHE_RS10680	D	RHE_RS06405_m3	D	-79	-54	AAAAAAGCGATTTACAAAAGTAATAC	10.0	6.1e-06	-12007	5215
RHE_RS10680	D	RHE_RS06405_m3	D	-67	-42	TACAAAAGTAATACTATATGATTTTT	10.9	2.1e-06	-13074	5678
RHE_RS10680	D	RHE_RS06405_m3	D	-66	-41	ACAAAAGTAATACTATATGATTTTTT	12.2	4.5e-07	-14614	6347
RHE_RS11740	R	RHE_RS06405_m3	R	-135	-110	ACAAAAACTATTTTATGATGTAATTA	11.0	1.9e-06	-13174	5721
RHE_RS12415	R	RHE_RS06405_m3	R	-41	-16	CTAAAAAGCTATGAATAAACCTATAG	12.1	5.2e-07	-14469	6284
RHE_RS13735	R	RHE_RS06405_m3	R	-396	-371	AAAAAATCTGGAAAACACTTTTAAAT	10.7	2.6e-06	-12860	5585
RHE_RS13735	R	RHE_RS06405_m3	R	-394	-369	GAAAAAAATCTGGAAAACACTTTTAA	9.8	7.5e-06	-11801	5125
RHE_RS16040	D	RHE_RS06405_m3	D	-43	-18	TAAACAAAGGTTGTATTTTTTTATAT	11.3	1.3e-06	-13553	5886
RHE_RS17050	D	RHE_RS06405_m3	D	-162	-137	AAAACAGAGAAATGGAAAAATTATTT	10.0	5.5e-06	-12111	5260
RHE_RS17050	D	RHE_RS06405_m3	D	-155	-130	AGAAATGGAAAAATTATTTAATAAAT	10.4	3.6e-06	-12535	5444
RHE_RS17050	D	RHE_RS06405_m3	D	-148	-123	GAAAAATTATTTAATAAATTCGATAC	9.9	6.1e-06	-12007	5215
RHE_RS18690	D	RHE_RS06405_m3	D	-112	-87	ATAAAAGTCATATCAGTTTCGTATAC	10.7	2.6e-06	-12860	5585
RHE_RS22155	R	RHE_RS06405_m3	R	-159	-134	GTAAAAATTATCTGATTGTTTTAATT	9.6	8.3e-06	-11699	5081
RHE_RS22790	R	RHE_RS06405_m3	R	-166	-141	TGAAAAATAATGATTATTTTGTATCT	10.3	4.5e-06	-12311	5347
RHE_RS22795	D	RHE_RS06405_m3	D	-223	-198	TGAAAAATAATGATTATTTTGTATCT	10.3	4.5e-06	-12311	5347
RHE_RS23690	R	RHE_RS06405_m3	R	-105	-80	ATAAATTTAATAGAGAAACTTTATTC	10.4	4.0e-06	-12429	5398
RHE_RS23690	R	RHE_RS06405_m3	R	-91	-66	AGAATACGTACTCTATAAATTTAATA	9.7	7.5e-06	-11801	5125
RHE_RS30055	R	RHE_RS06405_m3	R	-125	-100	GAAAAAACAAACGTCGAAGTTTATAT	11.4	1.2e-06	-13633	5921
RHE_RS01720	R	RHE_RS06405_m4	R	-308	-299	TGCAAGTAGA	12.8	3.7e-07	-14810	6432
RHE_RS06405	D	RHE_RS06405_m4	D	-280	-271	TGCAAGTAGA	12.8	3.7e-07	-14810	6432
RHE_RS13880	D	RHE_RS06405_m4	D	-117	-108	CCCAAGTAGA	11.0	4.1e-06	-12405	5387
RHE_RS14355	D	RHE_RS06405_m4	D	-37	-28	GCCAAGTAGA	10.7	5.3e-06	-12148	5276
RHE_RS24490	D	RHE_RS06405_m4	D	-169	-160	AGCAAGTAAA	10.0	9.0e-06	-11618	5046
RHE_RS31100	R	RHE_RS06405_m4	R	-253	-244	TGCAAGTAGC	10.5	6.3e-06	-11975	5201
RHE_RS00185	R	RHE_RS06405_m5	R	-225	-210	ATTATTTGATATTACT	12.2	3.7e-07	-14810	6432
RHE_RS16330	D	RHE_RS06405_m5	D	-147	-132	ATTATTTTCATTTACG	10.6	3.1e-06	-12684	5509
RHE_RS25565	D	RHE_RS06405_m5	D	-51	-36	ATTATAAGGATTTATA	9.7	9.3e-06	-11585	5032
RHE_RS30520	D	RHE_RS06405_m5	D	-139	-124	GGTATTAGAAATTACT	9.9	6.7e-06	-11913	5174
RHE_RS06535	R	RHE_RS06535_m1	R	-17	-5	TATCCTACCATAA	10.8	3.5e-06	-12563	5456
RHE_RS01740	D	RHE_RS06535_m2	D	-84	-68	TTCCGTTGAATGGAAGA	10.2	5.1e-06	-12186	5292
RHE_RS04310	D	RHE_RS06535_m2	D	-111	-95	TTCCATTATTTGGAACT	11.9	9.4e-07	-13877	6027
RHE_RS06535	R	RHE_RS06535_m2	R	-26	-10	TACCATAAAGTGGAAAT	12.7	3.8e-07	-14783	6420
RHE_RS18085	R	RHE_RS06535_m2	R	-26	-10	TTCCAATTTTTGGGACA	10.1	5.6e-06	-12093	5252
RHE_RS24660	D	RHE_RS06535_m2	D	-125	-109	ATACAATTTTTGGAAGC	10.4	4.2e-06	-12380	5377
RHE_RS06535	R	RHE_RS06535_m3	R	-69	-43	CATTCTACTGCATCTCTGTGGAAGGCC	17.3	1.9e-09	-20081	8721
RHE_RS10400	D	RHE_RS06535_m3	D	-133	-107	CGAACTATTCTGCGATTATGGAAGTAA	8.7	9.3e-06	-11585	5032
RHE_RS16895	R	RHE_RS06535_m3	R	-93	-67	TAATCGACTCGCTAAAATTGGAATGAT	8.8	8.1e-06	-11724	5092
RHE_RS25180	R	RHE_RS06535_m3	R	-128	-102	TACTATCCGCTCAAGTTATGGAAGGCT	12.9	2.9e-07	-15053	6538
RHE_RS25185	D	RHE_RS06535_m3	D	-69	-43	TACTATCCGCTCAAGTTATGGAAGGCT	12.9	2.9e-07	-15053	6538
RHE_RS06535	R	RHE_RS06535_m4	R	-74	-45	TTCTACTGCATCTCTGTGGAAGGCCGTAGA	29.7	4.8e-15	-32970	14319
RHE_RS16760	D	RHE_RS06535_m4	D	-135	-106	TGCTACGCCCCTTCTTTGTCGGGTGGAATA	1.3	7.2e-06	-11841	5143
RHE_RS24545	D	RHE_RS06535_m4	D	-33	-4	TTATCCGACACTTCAGATAAGGGCAGTTGA	0.9	8.7e-06	-11652	5060
RHE_RS01740	D	RHE_RS06535_m5	D	-90	-68	CGTCCCTTCCGTTGAATGGAAGA	10.6	3.1e-06	-12684	5509
RHE_RS06535	R	RHE_RS06535_m5	R	-67	-45	TTCTACTGCATCTCTGTGGAAGG	13.9	7.0e-08	-16475	7155
RHE_RS06535	R	RHE_RS06535_m5	R	-26	-4	CTATCCTACCATAAAGTGGAAAT	16.5	7.6e-10	-20998	9119
RHE_RS09210	D	RHE_RS06535_m5	D	-29	-7	CTATCCTAACGACAGGAGGAATA	9.5	8.6e-06	-11664	5066
RHE_RS21445	R	RHE_RS06535_m5	R	-136	-114	TACTCCTTCCGATGGTCGGAAGG	13.2	1.8e-07	-15530	6745
RHE_RS06555	D	RHE_RS06555_m1	D	-21	-11	ACAGGATGAAC	12.9	5.2e-07	-14469	6284
RHE_RS06875	R	RHE_RS06555_m1	R	-24	-14	ACAGGATGAAA	10.8	3.6e-06	-12535	5444
RHE_RS18175	D	RHE_RS06555_m1	D	-66	-56	ATAGGGTGAAC	11.8	8.6e-07	-13966	6066
RHE_RS19830	D	RHE_RS06555_m1	D	-11	-1	AGAGGATGAAT	9.5	9.7e-06	-11543	5013
RHE_RS06555	D	RHE_RS06555_m2	D	-18	-3	GGATGAACTTGGACCG	14.3	1.6e-08	-17951	7796
RHE_RS30525	D	RHE_RS06555_m2	D	-209	-194	GGGTGATGTTGGACCT	10.5	3.3e-06	-12622	5481
RHE_RS06680	D	RHE_RS06580_m1	D	-61	-46	GGGGCCGATGCCGCTC	9.6	7.5e-06	-11801	5125
RHE_RS08960	R	RHE_RS06580_m1	R	-26	-11	GAGGCCGATGTCGTCG	9.5	8.4e-06	-11687	5076
RHE_RS26875	R	RHE_RS06580_m1	R	-131	-116	GTTACCGATACCGGTA	9.7	6.6e-06	-11928	5180
RHE_RS14760	R	RHE_RS06580_m2	R	-49	-39	GGCCGATTCAG	9.4	8.7e-06	-11652	5060
RHE_RS30570	R	RHE_RS06580_m2	R	-349	-339	AACCGATCCAT	9.4	8.7e-06	-11652	5060
RHE_RS06580	D	RHE_RS06580_m3	D	-47	-37	ATCGGTCTATT	11.4	2.4e-06	-12940	5620
RHE_RS13150	D	RHE_RS06580_m3	D	-233	-223	ACCGCCCTATT	10.4	4.9e-06	-12226	5310
RHE_RS13265	R	RHE_RS06580_m4	R	-319	-302	ATTGAAAGGGCCGAAGCC	8.3	8.0e-06	-11736	5097
RHE_RS08895	D	RHE_RS06580_m5	D	-53	-24	CGCCGGCGCGCGCGTCTGGGTTCCCCAGGC	14.0	2.3e-08	-17588	7638
RHE_RS22030	R	RHE_RS06580_m5	R	-130	-101	GGCCGGTGGCGACAGCGACCACTCCAAGGA	10.2	4.6e-06	-12289	5337
RHE_RS26070	D	RHE_RS06580_m5	D	-203	-174	GCCCGGACTTCCCCCCTCGCCATCTCAGGG	9.6	8.7e-06	-11652	5060
RHE_RS05965	D	RHE_RS06620_m1	D	-60	-30	CCTCCCCCTTGTGGGGAGGGGTTGGGGAGGG	9.5	8.0e-06	-11736	5097
RHE_RS26605	R	RHE_RS06620_m1	R	-77	-47	GTGCCCCGTCTCCCGGGGCGGTAGAGGGGAG	10.3	3.9e-06	-12455	5409
RHE_RS02830	D	RHE_RS06620_m3	D	-270	-247	GGCCGCCCCCTCTGCCCTGCCGGG	9.8	6.9e-06	-11884	5161
RHE_RS12920	R	RHE_RS06620_m3	R	-66	-43	CCTCCCCCCGGCGGGGCGGACGAT	10.5	3.3e-06	-12622	5481
RHE_RS15155	R	RHE_RS06620_m3	R	-250	-227	GGCCCCCTCATCCGACCCTCCGGG	9.5	9.2e-06	-11596	5036
RHE_RS22625	R	RHE_RS06620_m3	R	-158	-135	GTTTCCCCGGCGCTGCCCGCCGGG	10.0	5.5e-06	-12111	5260
RHE_RS22630	D	RHE_RS06620_m3	D	-98	-75	GTTTCCCCGGCGCTGCCCGCCGGG	10.0	5.5e-06	-12111	5260
RHE_RS24300	R	RHE_RS06620_m3	R	-47	-24	CGGCCCCCTCATCCGGCTGCCGCC	10.8	2.4e-06	-12940	5620
RHE_RS27280	R	RHE_RS06620_m3	R	-151	-128	CCTCCCCCGGCCATCGCCGCCGCT	11.7	8.0e-07	-14039	6097
RHE_RS32880	D	RHE_RS06620_m4	D	-147	-118	TTCCCGCGCGCGCTGAACCCCGCGCGGCGG	9.6	8.5e-06	-11675	5071
RHE_RS06620	D	RHE_RS06620_m4	D	-62	-33	GAGCCGTGCGGAGGAAACTCCGCGCGGCTC	16.6	2.2e-10	-22237	9658
RHE_RS09030	R	RHE_RS06620_m4	R	-214	-185	GTGCCGCCCGTCCGCTGGTCGACGAGGCGC	9.7	8.5e-06	-11675	5071
RHE_RS14280	R	RHE_RS06620_m4	R	-132	-103	GAGCAGCGGCGAGCCCGCCCCTGACGACGC	10.2	4.6e-06	-12289	5337
RHE_RS29255	D	RHE_RS06620_m4	D	-85	-56	CCGCGGCGCTACGACCGCGGGCAGCGGCAC	9.5	9.2e-06	-11596	5036
RHE_RS12800	D	RHE_RS06620_m5	D	-192	-183	GCCCCCGCCG	10.7	3.3e-06	-12622	5481
RHE_RS21830	D	RHE_RS06620_m5	D	-280	-271	GCCCCCGCCC	10.5	4.5e-06	-12311	5347
RHE_RS06160	R	RHE_RS06705_m1	R	-204	-183	ATGACGCAATCTATTGCCAAGA	9.3	9.6e-06	-11554	5018
RHE_RS06320	D	RHE_RS06705_m1	D	-41	-20	TTAGAGCAAGCTTATGCATCGC	9.6	7.7e-06	-11774	5114
RHE_RS06705	D	RHE_RS06705_m1	D	-46	-25	TATACGCAATCTTCTGCCAAAT	14.1	7.2e-08	-16447	7143
RHE_RS16555	R	RHE_RS06705_m1	R	-291	-270	TGATCGCAATCGCTTGCCCTGA	10.4	3.9e-06	-12455	5409
RHE_RS23835	R	RHE_RS06705_m1	R	-78	-57	TTATAGCAAACGTTTGCCAAAA	12.9	3.2e-07	-14955	6495
RHE_RS23840	D	RHE_RS06705_m1	D	-169	-148	TTATAGCAAACGTTTGCCAAAA	12.9	3.2e-07	-14955	6495
RHE_RS00730	R	RHE_RS06705_m2	R	-105	-84	ACTGCGCATAACCTTGCTGATA	11.9	5.4e-07	-14432	6268
RHE_RS06705	D	RHE_RS06705_m2	D	-86	-65	CCGAGGCATGTCCTTGCTATCT	21.2	5.8e-12	-25873	11237
RHE_RS05640	D	RHE_RS06705_m3	D	-191	-170	CGATCGCAATGACAAGCTCAAC	4.9	8.5e-06	-11675	5071
RHE_RS06705	D	RHE_RS06705_m4	D	-36	-25	CTTCTGCCAAAT	12.7	3.4e-07	-14894	6469
RHE_RS01170	D	RHE_RS06705_m5	D	-54	-29	GGCATGCTTCTTGCATCATTACTAAT	11.6	8.6e-07	-13966	6066
RHE_RS06825	R	RHE_RS06825_m1	R	-24	-5	ATGAAAACCCCCTTTCCCCC	11.7	7.2e-07	-14144	6143
RHE_RS17205	R	RHE_RS06825_m1	R	-56	-37	ATGAAAGCGAGTGTTCCGCC	8.6	5.6e-06	-12093	5252
RHE_RS17210	D	RHE_RS06825_m1	D	-108	-89	ATGAAAGCGAGTGTTCCGCC	8.6	5.6e-06	-12093	5252
RHE_RS29240	D	RHE_RS06825_m2	D	-68	-49	GTGAGACGCCCGGTTCATCC	6.9	9.0e-06	-11618	5046
RHE_RS02790	R	RHE_RS06825_m3	R	-113	-90	TACGAGGAGGCGCGGATGAAGTGC	4.4	4.4e-06	-12334	5357
RHE_RS24110	R	RHE_RS06825_m3	R	-88	-65	TGCGAAAAGCCATGGGAGAAAGAG	4.6	3.9e-06	-12455	5409
RHE_RS24745	D	RHE_RS06825_m3	D	-36	-13	ACCGTGGAGGCGGTAAGAAAGGGG	3.0	8.7e-06	-11652	5060
RHE_RS06825	R	RHE_RS06825_m4	R	-35	-6	TGAAAACCCCCTTTCCCCCATGCCTCTACA	34.8	3.1e-18	-40315	17509
RHE_RS11295	D	RHE_RS06825_m4	D	-46	-17	AAAAACGTCCATGTCATTGTCGCCTCAACT	2.3	9.8e-06	-11533	5009
RHE_RS13265	R	RHE_RS06825_m4	R	-72	-43	GGGAAATCGCCTTTCTCCAGCCCATGTAGG	10.0	1.4e-07	-15782	6854
RHE_RS04315	D	RHE_RS06825_m5	D	-16	-7	AGATGAAAAC	10.5	6.1e-06	-12007	5215
RHE_RS06825	R	RHE_RS06825_m5	R	-12	-3	GGATGAAAAC	11.7	1.4e-06	-13479	5854
RHE_RS08025	R	RHE_RS06825_m5	R	-94	-85	GGATGAAAAG	10.2	7.7e-06	-11774	5114
RHE_RS16825	R	RHE_RS06825_m5	R	-182	-173	AGATGAAAAC	10.5	6.1e-06	-12007	5215
RHE_RS05940	D	RHE_RS06845_m1	D	-213	-203	GCCAGCCCGCC	9.9	9.6e-06	-11554	5018
RHE_RS06095	R	RHE_RS06845_m1	R	-63	-53	GCCAGCCCGCC	9.9	9.6e-06	-11554	5018
RHE_RS06845	R	RHE_RS06845_m1	R	-34	-24	GGCAGCCCGAC	11.7	7.5e-07	-14103	6125
RHE_RS13755	D	RHE_RS06845_m1	D	-254	-244	GCCAGCCCGCC	9.9	9.6e-06	-11554	5018
RHE_RS16135	D	RHE_RS06845_m1	D	-55	-45	GACAGCCCGTC	10.0	7.3e-06	-11828	5137
RHE_RS20885	D	RHE_RS06845_m1	D	-368	-358	GGCAGGCCGCC	10.7	5.9e-06	-12041	5229
RHE_RS23690	R	RHE_RS06845_m1	R	-36	-26	GACAGCCCGTC	10.0	7.3e-06	-11828	5137
RHE_RS26115	R	RHE_RS06845_m2	R	-66	-55	TAACCCGGAAAA	10.2	5.7e-06	-12075	5244
RHE_RS06845	R	RHE_RS06845_m3	R	-28	-18	CAGACAGGCAG	10.9	2.2e-06	-13027	5658
RHE_RS24660	D	RHE_RS06845_m4	D	-28	-12	CAACCAGTACTATCTGC	9.2	5.6e-06	-12093	5252
RHE_RS06845	R	RHE_RS06845_m5	R	-34	-20	GACAGGCAGCCCGAC	11.5	1.4e-06	-13479	5854
RHE_RS11360	D	RHE_RS06845_m5	D	-205	-191	AGCAGGCAGTCCGCC	10.0	6.8e-06	-11899	5167
RHE_RS14210	R	RHE_RS06845_m5	R	-207	-193	GACGGGCTGGCCGCC	12.3	5.5e-07	-14413	6260
RHE_RS32435	D	RHE_RS06845_m5	D	-82	-68	GACGGGCAGTCCGGT	10.4	5.2e-06	-12167	5284
RHE_RS00185	R	RHE_RS06875_m1	R	-223	-202	ATCGATTAATTATTTGATATTA	9.2	2.8e-06	-12786	5553
RHE_RS00185	R	RHE_RS06875_m1	R	-219	-198	TTAAATCGATTAATTATTTGAT	8.0	5.6e-06	-12093	5252
RHE_RS06680	D	RHE_RS06875_m1	D	-155	-134	TTGTAATGAATATTCCGTAATA	7.0	9.6e-06	-11554	5018
RHE_RS06875	R	RHE_RS06875_m1	R	-40	-19	ATGAAACAAATATTCCATATTG	17.9	1.9e-09	-20081	8721
RHE_RS07235	D	RHE_RS06875_m1	D	-27	-6	TGAAATGGAATAGTTGTTTTGC	9.3	2.6e-06	-12860	5585
RHE_RS20665	D	RHE_RS06875_m1	D	-175	-154	ATAAAATACATATTCGATCCTT	9.5	2.3e-06	-12983	5638
RHE_RS26195	R	RHE_RS06875_m1	R	-43	-22	CTGTACGGAATAATTGTTTCCT	10.4	1.3e-06	-13553	5886
RHE_RS04650	R	RHE_RS06875_m2	R	-125	-101	TTAGAATAATTTACATGTTTCACCC	8.2	1.4e-06	-13479	5854
RHE_RS04655	D	RHE_RS06875_m2	D	-83	-59	TTAGAATAATTTACATGTTTCACCC	8.2	1.4e-06	-13479	5854
RHE_RS06875	R	RHE_RS06875_m2	R	-180	-156	TCAAAATGGTCCAAATATTCCAAAA	21.5	4.7e-11	-23781	10328
RHE_RS06875	R	RHE_RS06875_m2	R	-38	-14	ACAGGATGAAACAAATATTCCATAT	16.6	5.0e-09	-19114	8301
RHE_RS07235	D	RHE_RS06875_m2	D	-28	-4	TTGAAATGGAATAGTTGTTTTGCCC	6.8	3.0e-06	-12717	5523
RHE_RS09390	D	RHE_RS06875_m2	D	-256	-232	GGTAAATAGTATGACTAATTGATAT	6.3	3.9e-06	-12455	5409
RHE_RS12060	R	RHE_RS06875_m2	R	-165	-141	CGCAAATGGAATTTTTGTTCCATTT	11.1	2.5e-07	-15202	6602
RHE_RS12060	R	RHE_RS06875_m2	R	-135	-111	TTAAAATCAAGCAATCATTTCACTA	7.2	2.4e-06	-12940	5620
RHE_RS12065	D	RHE_RS06875_m2	D	-72	-48	TTAAAATCAAGCAATCATTTCACTA	7.2	2.4e-06	-12940	5620
RHE_RS12065	D	RHE_RS06875_m2	D	-42	-18	CGCAAATGGAATTTTTGTTCCATTT	11.1	2.5e-07	-15202	6602
RHE_RS17050	D	RHE_RS06875_m2	D	-156	-132	GAGAAATGGAAAAATTATTTAATAA	8.8	9.9e-07	-13826	6004
RHE_RS20665	D	RHE_RS06875_m2	D	-180	-156	ATTGAATAAAATACATATTCGATCC	4.7	8.8e-06	-11641	5056
RHE_RS20915	R	RHE_RS06875_m2	R	-42	-18	ATGAAGTGAGACGATTGTTCTAATC	4.6	9.2e-06	-11596	5036
RHE_RS06875	R	RHE_RS06875_m3	R	-180	-156	TCAAAATGGTCCAAATATTCCAAAA	18.3	1.3e-09	-20461	8886
RHE_RS06875	R	RHE_RS06875_m3	R	-38	-14	ACAGGATGAAACAAATATTCCATAT	19.7	3.3e-10	-21832	9481
RHE_RS07235	D	RHE_RS06875_m3	D	-28	-4	TTGAAATGGAATAGTTGTTTTGCCC	6.1	4.3e-06	-12357	5367
RHE_RS12060	R	RHE_RS06875_m3	R	-165	-141	CGCAAATGGAATTTTTGTTCCATTT	11.6	1.9e-07	-15476	6721
RHE_RS12060	R	RHE_RS06875_m3	R	-135	-111	TTAAAATCAAGCAATCATTTCACTA	6.7	3.1e-06	-12684	5509
RHE_RS12065	D	RHE_RS06875_m3	D	-72	-48	TTAAAATCAAGCAATCATTTCACTA	6.7	3.1e-06	-12684	5509
RHE_RS12065	D	RHE_RS06875_m3	D	-42	-18	CGCAAATGGAATTTTTGTTCCATTT	11.6	1.9e-07	-15476	6721
RHE_RS15180	R	RHE_RS06875_m3	R	-28	-4	CCTATGTTCACTATATGTTCTAATA	5.0	7.8e-06	-11761	5108
RHE_RS17050	D	RHE_RS06875_m3	D	-156	-132	GAGAAATGGAAAAATTATTTAATAA	9.5	7.1e-07	-14158	6149
RHE_RS20915	R	RHE_RS06875_m3	R	-42	-18	ATGAAGTGAGACGATTGTTCTAATC	6.8	3.1e-06	-12684	5509
RHE_RS29840	D	RHE_RS06875_m3	D	-201	-177	GCCATTTGGACTAGAATTTCCACTT	5.4	6.1e-06	-12007	5215
RHE_RS06135	D	RHE_RS06875_m4	D	-72	-48	TCATTGAACATCTGTACTGTTTCGC	6.0	5.2e-06	-12167	5284
RHE_RS06875	R	RHE_RS06875_m4	R	-41	-17	GGATGAAACAAATATTCCATATTGC	15.9	8.9e-09	-18537	8051
RHE_RS07235	D	RHE_RS06875_m4	D	-25	-1	AAATGGAATAGTTGTTTTGCCCTAT	8.0	1.7e-06	-13285	5770
RHE_RS07440	R	RHE_RS06875_m4	R	-43	-19	CTGTGAAAAGTATGATTTATTGCGC	5.5	6.4e-06	-11959	5194
RHE_RS09210	D	RHE_RS06875_m4	D	-100	-76	ATGAAGAATATTGGTTCCGTACTGG	8.0	1.7e-06	-13285	5770
RHE_RS12060	R	RHE_RS06875_m4	R	-168	-144	AAATGGAATTTTTGTTCCATTTGCT	15.1	1.7e-08	-17890	7770
RHE_RS12065	D	RHE_RS06875_m4	D	-39	-15	AAATGGAATTTTTGTTCCATTTGCT	15.1	1.7e-08	-17890	7770
RHE_RS17050	D	RHE_RS06875_m4	D	-108	-84	AATTAGAATTTGTTAACCATTTCGT	5.0	8.3e-06	-11699	5081
RHE_RS20810	D	RHE_RS06875_m4	D	-302	-278	CGATGGATGTGTTGTACCATATTCC	5.5	6.4e-06	-11959	5194
RHE_RS23915	R	RHE_RS06875_m4	R	-168	-144	ATACGAACTAGTTAGTACATTTTGG	5.6	6.1e-06	-12007	5215
RHE_RS23920	D	RHE_RS06875_m4	D	-144	-120	ATACGAACTAGTTAGTACATTTTGG	5.6	6.1e-06	-12007	5215
RHE_RS05940	D	RHE_RS06875_m5	D	-20	-11	CTGGAGGAGA	10.7	4.3e-06	-12357	5367
RHE_RS10680	D	RHE_RS06875_m5	D	-14	-5	TGGGAGGATA	10.5	5.4e-06	-12129	5268
RHE_RS18760	D	RHE_RS06875_m5	D	-13	-4	CGGGAGGAGA	11.5	3.3e-06	-12622	5481
RHE_RS24475	R	RHE_RS06875_m5	R	-144	-135	CGGGAGGAAA	10.3	5.4e-06	-12129	5268
RHE_RS27845	R	RHE_RS06875_m5	R	-90	-81	CAGGAGGATA	9.7	9.0e-06	-11618	5046
RHE_RS06680	D	RHE_RS06955_m1	D	-184	-168	TCACTAAGTGGTTATAA	8.9	5.2e-06	-12167	5284
RHE_RS06955	R	RHE_RS06955_m1	R	-31	-15	CCACTAACACGTTACGC	10.1	2.3e-06	-12983	5638
RHE_RS01430	D	RHE_RS06955_m2	D	-66	-44	TTAATAGATGCATTTGCATATAA	6.5	8.9e-06	-11629	5051
RHE_RS06955	R	RHE_RS06955_m2	R	-104	-82	TCTAAAGTAGGAATCGAATACCA	10.7	7.9e-07	-14051	6102
RHE_RS17400	D	RHE_RS06955_m2	D	-315	-293	ACAAAAGTTTTTTGACATTTTTG	6.6	8.4e-06	-11687	5076
RHE_RS03645	R	RHE_RS06955_m3	R	-39	-27	TTCTAAATTAACG	10.5	4.0e-06	-12429	5398
RHE_RS09130	R	RHE_RS06955_m3	R	-118	-106	AACTATGTTAATT	10.0	6.3e-06	-11975	5201
RHE_RS19030	D	RHE_RS06955_m3	D	-162	-150	ATCTAGATCAATG	10.2	5.3e-06	-12148	5276
RHE_RS32555	R	RHE_RS06955_m3	R	-320	-308	ATATACGTTAATG	10.5	4.0e-06	-12429	5398
RHE_RS01410	R	RHE_RS06955_m4	R	-43	-16	CAGTAGATATCTTGACGTCAAGATAAAC	8.6	8.2e-07	-14014	6086
RHE_RS02975	R	RHE_RS06955_m4	R	-107	-80	GTGTAAGCGATGCTGGTTCGGGATAATA	6.8	2.0e-06	-13122	5699
RHE_RS06405	D	RHE_RS06955_m4	D	-385	-358	GAGTAAAGCTTGGGCTAAAGTCCTATAA	4.2	7.4e-06	-11814	5131
RHE_RS06955	R	RHE_RS06955_m4	R	-402	-375	AAGTAGATACGCCTTTAGGTGAATAAGC	9.6	4.4e-07	-14636	6357
RHE_RS15675	D	RHE_RS06955_m4	D	-164	-137	AGGAAAACCCCTTGGGAAGGGGATAAGA	9.1	5.9e-07	-14343	6229
RHE_RS22155	R	RHE_RS06955_m4	R	-159	-132	AGGTAAAAATTATCTGATTGTTTTAATT	3.9	8.6e-06	-11664	5066
RHE_RS22960	D	RHE_RS06955_m4	D	-272	-245	CCTTAAAACTCGTCGTATCGCATTAAAC	5.7	3.6e-06	-12535	5444
RHE_RS27815	D	RHE_RS06955_m4	D	-148	-121	GAGTAATTAGTGCACGACTGGAAAAAGT	4.1	7.7e-06	-11774	5114
RHE_RS03770	D	RHE_RS06955_m5	D	-60	-43	ATAAAGCCCGGGGTAACG	10.0	6.2e-06	-11991	5208
RHE_RS04545	R	RHE_RS06955_m5	R	-39	-22	GTAAATATATTAGTAACC	11.6	9.2e-07	-13899	6036
RHE_RS09045	R	RHE_RS06955_m5	R	-35	-18	AAAAAATAATAGGTAACG	10.3	4.5e-06	-12311	5347
RHE_RS22145	R	RHE_RS06955_m5	R	-155	-138	ACAAATATTACTTTAAAA	9.8	7.7e-06	-11774	5114
RHE_RS02800	R	RHE_RS07105_m1	R	-90	-77	GAAATCGTTGCCAG	10.1	6.2e-06	-11991	5208
RHE_RS07105	D	RHE_RS07105_m1	D	-81	-68	CGAATCATTGCCTT	10.1	6.6e-06	-11928	5180
RHE_RS16100	R	RHE_RS07105_m1	R	-208	-195	AGAATCATTGCCAT	9.9	7.2e-06	-11841	5143
RHE_RS02800	R	RHE_RS07105_m2	R	-90	-74	TGTGAAATCGTTGCCAG	14.5	7.4e-08	-16419	7131
RHE_RS27930	R	RHE_RS07105_m2	R	-107	-91	GATGATTTCGTTGCCCC	8.6	9.5e-06	-11564	5022
RHE_RS27935	D	RHE_RS07105_m2	D	-82	-66	GATGATTTCGTTGCCCC	8.6	9.5e-06	-11564	5022
RHE_RS07105	D	RHE_RS07105_m3	D	-93	-78	GTTGTTGCGGAACGAA	13.0	3.0e-07	-15019	6523
RHE_RS00340	D	RHE_RS07105_m4	D	-110	-90	AAATGTCTAAAGAAAAAGGCG	9.8	4.7e-06	-12268	5328
RHE_RS07105	D	RHE_RS07105_m5	D	-111	-98	TCCTTGGAAAAAAA	12.6	6.9e-07	-14187	6161
RHE_RS07110	D	RHE_RS07105_m5	D	-91	-78	GTCTTTTTTAAATG	11.9	1.3e-06	-13553	5886
RHE_RS23835	R	RHE_RS07105_m5	R	-94	-81	TGCTTGCTAAAAAA	9.4	9.7e-06	-11543	5013
RHE_RS23840	D	RHE_RS07105_m5	D	-145	-132	TGCTTGCTAAAAAA	9.4	9.7e-06	-11543	5013
RHE_RS07110	D	RHE_RS07110_m1	D	-95	-76	ATATGTCTTTTTTAAATGCA	23.1	7.9e-12	-25564	11102
RHE_RS15700	D	RHE_RS07110_m1	D	-109	-90	GCAAGCCTTACTGAAATGTA	2.9	9.5e-06	-11564	5022
RHE_RS01720	R	RHE_RS07110_m3	R	-358	-341	AGGCATTCACAAAAGAAC	9.2	2.4e-06	-12940	5620
RHE_RS05790	D	RHE_RS07110_m3	D	-313	-296	CCGCAATGCAAAAAAACA	6.9	9.5e-06	-11564	5022
RHE_RS06820	D	RHE_RS07110_m3	D	-396	-379	GCGCATTCGTCAAAGATA	7.0	8.6e-06	-11664	5066
RHE_RS07925	R	RHE_RS07110_m3	R	-162	-145	TGTCATTGACAAAAGAGG	9.2	2.4e-06	-12940	5620
RHE_RS26750	R	RHE_RS07110_m3	R	-53	-36	TAGCATTTACTACAGAAA	8.3	4.0e-06	-12429	5398
RHE_RS31110	D	RHE_RS07110_m3	D	-251	-234	GCCCATTGATAAAAGAAA	7.4	6.8e-06	-11899	5167
RHE_RS07210	D	RHE_RS07210_m1	D	-30	-19	TCGCATAAGTAC	13.2	4.0e-07	-14732	6398
RHE_RS18760	D	RHE_RS07210_m1	D	-101	-90	TGACATAAGTGT	10.1	5.3e-06	-12148	5276
RHE_RS07210	D	RHE_RS07210_m2	D	-31	-6	ATCGCATAAGTACGTGCTTATGTGTT	28.8	3.1e-14	-31105	13509
RHE_RS22610	R	RHE_RS07210_m2	R	-232	-207	CGCGCATAAGCAAACACTTTTTATTT	-5.5	9.1e-06	-11607	5041
RHE_RS07210	D	RHE_RS07210_m3	D	-31	-6	ATCGCATAAGTACGTGCTTATGTGTT	28.7	3.0e-14	-31138	13523
RHE_RS22610	R	RHE_RS07210_m3	R	-232	-207	CGCGCATAAGCAAACACTTTTTATTT	-3.3	5.7e-06	-12075	5244
RHE_RS02165	D	RHE_RS07210_m4	D	-115	-88	ATTCAATTAATTAAGCAATTATCTAATT	-0.3	3.1e-06	-12684	5509
RHE_RS07210	D	RHE_RS07210_m4	D	-32	-5	AATCGCATAAGTACGTGCTTATGTGTTC	27.9	7.0e-14	-30290	13155
RHE_RS22610	R	RHE_RS07210_m4	R	-233	-206	CCGCGCATAAGCAAACACTTTTTATTTT	0.0	2.8e-06	-12786	5553
RHE_RS07210	D	RHE_RS07210_m5	D	-30	-18	TCGCATAAGTACG	12.2	7.6e-07	-14090	6119
RHE_RS07480	R	RHE_RS07480_m1	R	-35	-16	GAGAGAAGGAACGTTCTTTC	15.9	8.2e-09	-18619	8086
RHE_RS32060	R	RHE_RS07480_m1	R	-96	-77	AACAGACCAGACGGTCTTAT	8.9	9.7e-06	-11543	5013
RHE_RS01645	R	RHE_RS07480_m2	R	-112	-100	GATGAGAGAGAAA	9.9	8.1e-06	-11724	5092
RHE_RS07480	R	RHE_RS07480_m2	R	-23	-11	GGTGAGAGAGAAG	9.8	9.6e-06	-11554	5018
RHE_RS16330	D	RHE_RS07480_m2	D	-15	-3	TGGGAGAGAGACC	10.1	6.2e-06	-11991	5208
RHE_RS16435	D	RHE_RS07480_m2	D	-13	-1	TGAGAGAAAGAAT	10.0	7.1e-06	-11855	5149
RHE_RS20885	D	RHE_RS07480_m2	D	-115	-103	AGAGAGAAAGAAG	10.1	6.2e-06	-11991	5208
RHE_RS22740	D	RHE_RS07480_m2	D	-188	-176	CACGAGAGAGACG	10.1	6.2e-06	-11991	5208
RHE_RS25240	D	RHE_RS07480_m2	D	-47	-35	GGCGAGAGAGAAG	9.9	8.1e-06	-11724	5092
RHE_RS03575	D	RHE_RS07480_m3	D	-110	-99	CACACCGGTCTG	12.5	3.7e-07	-14810	6432
RHE_RS08955	D	RHE_RS07480_m3	D	-71	-60	CGCACAGGTCAG	10.0	7.7e-06	-11774	5114
RHE_RS12670	D	RHE_RS07480_m3	D	-120	-109	CTCACCGGTCTT	10.4	4.6e-06	-12289	5337
RHE_RS29820	D	RHE_RS07480_m3	D	-380	-369	CTCACCGGTCTG	12.1	5.1e-07	-14489	6292
RHE_RS05465	R	RHE_RS07480_m4	R	-126	-103	AGAGAAATCGAAATGTGGTTCTCT	5.8	7.9e-06	-11749	5102
RHE_RS07480	R	RHE_RS07480_m4	R	-38	-15	AGAGAGAAGGAACGTTCTTTCTCG	24.8	4.1e-13	-28523	12387
RHE_RS27460	R	RHE_RS07480_m4	R	-208	-185	AGAGCGAAGCCAATTTTTCTCCCT	6.1	7.1e-06	-11855	5149
RHE_RS27465	D	RHE_RS07480_m4	D	-180	-157	AGAGCGAAGCCAATTTTTCTCCCT	6.1	7.1e-06	-11855	5149
RHE_RS07480	R	RHE_RS07480_m5	R	-34	-6	TGACCGGTGAGAGAGAAGGAACGTTCTTT	25.8	4.2e-14	-30801	13377
RHE_RS20665	D	RHE_RS07480_m5	D	-106	-78	TAACCCAATAAATTAGCGGAACGTTCTAT	7.8	2.7e-06	-12822	5569
RHE_RS22960	D	RHE_RS07480_m5	D	-29	-1	ATACCTAATAGAGAGATGAGGTGCTCCAT	6.2	6.9e-06	-11884	5161
RHE_RS11075	D	RHE_RS07685_m1	D	-40	-30	TCGGCTTAAAA	10.0	6.1e-06	-12007	5215
RHE_RS16435	D	RHE_RS07685_m1	D	-188	-178	CCGGCTTAATA	10.1	4.8e-06	-12247	5319
RHE_RS07685	D	RHE_RS07685_m2	D	-105	-83	CCATTAAGCCTGCGGTTTAAGTC	15.6	1.9e-08	-17779	7721
RHE_RS16260	D	RHE_RS07685_m2	D	-310	-288	GGCTTAAGGGGAAGCCTTAGGCA	6.1	8.4e-06	-11687	5076
RHE_RS28890	D	RHE_RS07685_m2	D	-138	-116	CTGTTAAACCTACCGATTACTCG	5.9	9.8e-06	-11533	5009
RHE_RS12415	R	RHE_RS07685_m3	R	-37	-17	TAAAAAGCTATGAATAAACCT	5.2	9.1e-06	-11607	5041
RHE_RS24570	D	RHE_RS07685_m3	D	-229	-209	TTAAAAGTTTGCCTAAAATCT	6.8	4.1e-06	-12405	5387
RHE_RS05945	R	RHE_RS07685_m4	R	-365	-347	GGTTAATGGATACTTAAAG	11.0	2.5e-06	-12899	5602
RHE_RS07055	D	RHE_RS07685_m4	D	-168	-150	TCTTAACGAAACCTTACCG	9.9	7.6e-06	-11787	5119
RHE_RS07685	D	RHE_RS07685_m4	D	-91	-73	GTTTAAGTCGAATTTTATA	12.2	6.0e-07	-14326	6222
RHE_RS29825	D	RHE_RS07685_m4	D	-268	-250	GATAAAGTCGCTCTTAAAG	10.9	2.8e-06	-12786	5553
RHE_RS03645	R	RHE_RS07835_m1	R	-139	-111	TTGTGCGCCGCACAATTTATGTTGCAATG	10.0	4.0e-06	-12429	5398
RHE_RS07835	R	RHE_RS07835_m1	R	-232	-204	TATTGCCCGGCGAAATTCGATGTGCAAAA	21.4	1.7e-13	-29403	12770
RHE_RS09750	R	RHE_RS07835_m2	R	-144	-134	AATTATGCAGC	10.5	4.0e-06	-12429	5398
RHE_RS10420	R	RHE_RS07835_m2	R	-30	-20	TATTATGCACA	10.0	7.7e-06	-11774	5114
RHE_RS10425	D	RHE_RS07835_m2	D	-29	-19	TATTATGCACA	10.0	7.7e-06	-11774	5114
RHE_RS07835	R	RHE_RS07835_m3	R	-74	-65	TCAAGACGCC	10.8	4.2e-06	-12380	5377
RHE_RS03180	D	RHE_RS07835_m4	D	-31	-19	CGGGGCATGGGAG	9.7	8.0e-06	-11736	5097
RHE_RS09030	R	RHE_RS07835_m4	R	-341	-329	ACGGGCCTGGGGG	10.0	6.0e-06	-12024	5222
RHE_RS18865	R	RHE_RS07835_m4	R	-97	-85	ACGGGAATGGGGC	10.2	4.0e-06	-12429	5398
RHE_RS29075	D	RHE_RS07835_m4	D	-135	-123	AGGGGCCTGGAAG	9.6	9.1e-06	-11607	5041
RHE_RS29390	D	RHE_RS07835_m4	D	-89	-77	AGGGGCTAGGGTG	9.8	7.0e-06	-11870	5155
RHE_RS04340	D	RHE_RS07835_m5	D	-49	-25	CCGGCACACCTCGTTAACCGGACGT	10.4	3.7e-06	-12507	5432
RHE_RS07835	R	RHE_RS07835_m5	R	-51	-27	CGGGCACGAAGATTTATGTGGACCG	18.6	5.2e-13	-28285	12284
RHE_RS09505	D	RHE_RS07835_m5	D	-208	-184	CGGGCAGGGGCCTTTACCGGGTCTC	9.8	7.2e-06	-11841	5143
RHE_RS10400	D	RHE_RS07835_m5	D	-249	-225	CCGGCACAAAGAGATGCGAGGACCT	11.2	1.5e-06	-13410	5824
RHE_RS17145	D	RHE_RS07925_m1	D	-16	-2	TACGAACAAATAAGA	10.7	1.8e-06	-13228	5745
RHE_RS23915	R	RHE_RS07925_m1	R	-159	-145	TACGAACTAGTTAGT	10.8	1.6e-06	-13346	5796
RHE_RS23920	D	RHE_RS07925_m1	D	-143	-129	TACGAACTAGTTAGT	10.8	1.6e-06	-13346	5796
RHE_RS27240	R	RHE_RS07925_m1	R	-74	-60	TACGAACTAACTGTG	10.4	2.2e-06	-13027	5658
RHE_RS07925	R	RHE_RS07925_m2	R	-158	-142	CTATGTCATTGACAAAA	14.8	3.2e-08	-17258	7495
RHE_RS07925	R	RHE_RS07925_m2	R	-152	-136	ATTTGTCTATGTCATTG	9.2	9.4e-06	-11575	5027
RHE_RS20595	D	RHE_RS07925_m2	D	-70	-54	ATTTGTCAATGACACAC	9.9	5.5e-06	-12111	5260
RHE_RS06065	D	RHE_RS07925_m3	D	-32	-22	CTATTTGTCCG	9.5	7.7e-06	-11774	5114
RHE_RS07925	R	RHE_RS07925_m3	R	-144	-134	CAATTTGTCTA	10.7	5.2e-07	-14469	6284
RHE_RS07925	R	RHE_RS07925_m4	R	-158	-136	ATTTGTCTATGTCATTGACAAAA	23.3	5.1e-12	-26002	11292
RHE_RS24615	R	RHE_RS07925_m4	R	-329	-307	ATGTGTATGCAACCTTAACAATG	5.5	7.5e-06	-11801	5125
RHE_RS24620	D	RHE_RS07925_m4	D	-37	-15	ATGTGTATGCAACCTTAACAATG	5.5	7.5e-06	-11801	5125
RHE_RS00340	D	RHE_RS07925_m5	D	-303	-278	TGACAAAAAATATTACAATTTGTACT	10.2	3.2e-06	-12652	5495
RHE_RS07925	R	RHE_RS07925_m5	R	-144	-119	GTACACGGAAGCCGACAATTTGTCTA	15.5	1.7e-08	-17890	7770
RHE_RS12920	R	RHE_RS07925_m5	R	-118	-93	GGACAAATGATGGTGTTACTTGTAAT	9.8	4.4e-06	-12334	5357
RHE_RS29990	R	RHE_RS07925_m5	R	-59	-34	AGACATTTTAGCAGACAATCTGTCAA	11.6	1.0e-06	-13816	6000
RHE_RS14185	R	RHE_RS08025_m1	R	-105	-92	ATCCATAAGGATAT	11.8	1.1e-06	-13720	5959
RHE_RS14190	D	RHE_RS08025_m1	D	-44	-31	ATCCATAAGGATAT	11.8	1.1e-06	-13720	5959
RHE_RS08025	R	RHE_RS08025_m2	R	-22	-3	GCCAAAGAAATCCTTATGCA	21.9	5.7e-12	-25891	11244
RHE_RS10580	R	RHE_RS08025_m2	R	-69	-50	GCAAATGGAATGCCTATGCA	8.0	6.2e-06	-11991	5208
RHE_RS19670	R	RHE_RS08025_m2	R	-79	-60	AGAAAAGGTTTTCTCATGCA	7.4	8.9e-06	-11629	5051
RHE_RS01720	R	RHE_RS08025_m3	R	-30	-8	ACTCATAAAGTCATCTGATGACT	12.4	3.8e-07	-14783	6420
RHE_RS15880	D	RHE_RS08025_m3	D	-32	-10	ATGCCTAAGCGACGCTGATGGAA	8.9	4.3e-06	-12357	5367
RHE_RS27195	D	RHE_RS08025_m3	D	-84	-62	CACGCTTAAATTAGTTAATGGTA	8.4	6.0e-06	-12024	5222
RHE_RS30305	R	RHE_RS08025_m3	R	-211	-189	TTTGATAAGCGCAGCTTATGAGG	14.9	4.1e-08	-17010	7387
RHE_RS30310	D	RHE_RS08025_m3	D	-58	-36	TTTGATAAGCGCAGCTTATGAGG	14.9	4.1e-08	-17010	7387
RHE_RS02715	R	RHE_RS08025_m4	R	-91	-73	GCTGATAGATTATATCAGA	10.2	3.4e-06	-12592	5469
RHE_RS04030	R	RHE_RS08025_m4	R	-40	-22	GCTGATGATAATCATTAGA	10.3	3.1e-06	-12684	5509
RHE_RS05300	D	RHE_RS08025_m4	D	-123	-105	CATAATACTTACGATCAGC	8.7	9.3e-06	-11585	5032
RHE_RS08025	R	RHE_RS08025_m4	R	-41	-23	TATGATAATATCCATAAGC	13.9	1.4e-07	-15782	6854
RHE_RS08025	R	RHE_RS08025_m4	R	-32	-14	CCTTATGCATATGATAATA	15.4	2.2e-08	-17632	7658
RHE_RS10410	D	RHE_RS08025_m4	D	-223	-205	TCTGATATTTACCATAATC	12.5	5.4e-07	-14432	6268
RHE_RS23565	R	RHE_RS08025_m4	R	-49	-31	GATTATGTTATCGATAACA	9.6	5.1e-06	-12186	5292
RHE_RS08025	R	RHE_RS08025_m5	R	-23	-1	ATGCCAAAGAAATCCTTATGCAT	10.0	4.8e-06	-12247	5319
RHE_RS15880	D	RHE_RS08025_m5	D	-32	-10	ATGCCTAAGCGACGCTGATGGAA	11.8	9.6e-07	-13856	6018
RHE_RS23775	D	RHE_RS08025_m5	D	-162	-140	AGCAATAAGCAACAGTTATGGAG	12.0	7.0e-07	-14172	6155
RHE_RS23915	R	RHE_RS08025_m5	R	-162	-140	TGACATACGAACTAGTTAGTACA	11.2	1.6e-06	-13346	5796
RHE_RS23920	D	RHE_RS08025_m5	D	-148	-126	TGACATACGAACTAGTTAGTACA	11.2	1.6e-06	-13346	5796
RHE_RS24660	D	RHE_RS08025_m5	D	-175	-153	TTGCATAAGCCTCGGTAATGGTT	10.0	4.8e-06	-12247	5319
RHE_RS25905	R	RHE_RS08025_m5	R	-139	-117	CTAAATAAGCAATGGTTAGTTCC	12.9	2.7e-07	-15125	6569
RHE_RS08350	D	RHE_RS08350_m1	D	-110	-92	TCAACCAAATACCGCTAGC	20.2	1.1e-11	-25233	10959
RHE_RS29845	D	RHE_RS08350_m1	D	-64	-46	TTAACTACTCCTCACTAAC	11.9	6.5e-07	-14246	6187
RHE_RS05465	R	RHE_RS08350_m3	R	-187	-165	ATGGTTTAATAATATTCAAATTC	9.0	2.5e-06	-12899	5602
RHE_RS12380	D	RHE_RS08350_m3	D	-100	-78	ATAGTTTCACAATTGGCGAACTA	10.0	1.3e-06	-13553	5886
RHE_RS02385	D	RHE_RS08350_m4	D	-168	-145	GATTTCAATTTTAAATCGAAAATT	5.7	6.3e-06	-11975	5201
RHE_RS08350	D	RHE_RS08350_m4	D	-123	-100	AGTTACCTTTTCTTCAACCAAATA	21.4	4.9e-11	-23739	10310
RHE_RS11740	R	RHE_RS08350_m4	R	-154	-131	AATTACAATACGTTAAATCAAAAT	5.3	7.6e-06	-11787	5119
RHE_RS18665	R	RHE_RS08350_m4	R	-55	-32	AATTTGATGTACGTAAATCAAAAA	7.4	2.6e-06	-12860	5585
RHE_RS19425	R	RHE_RS08350_m4	R	-69	-46	ACTTTCCTTTTCGATCGGTAAAGA	5.5	7.0e-06	-11870	5155
RHE_RS25040	R	RHE_RS08350_m4	R	-225	-202	CCTTACCAAAATGTAATGTAAATT	6.4	4.4e-06	-12334	5357
RHE_RS27240	R	RHE_RS08350_m4	R	-34	-11	CCTTTCTGATACTATAGGCAATTT	5.1	8.4e-06	-11687	5076
RHE_RS06495	R	RHE_RS08350_m5	R	-290	-263	GGTAAATTCGGATTTCTTGATGAAAAAC	12.4	3.8e-07	-14783	6420
RHE_RS08350	D	RHE_RS08350_m5	D	-127	-100	GGTAAGTTACCTTTTCTTCAACCAAATA	25.9	1.4e-16	-36505	15854
RHE_RS11740	R	RHE_RS08350_m5	R	-155	-128	TGTAATTACAATACGTTAAATCAAAATC	9.7	2.7e-06	-12822	5569
RHE_RS24090	D	RHE_RS08350_m5	D	-145	-118	GTTAACAATACCTTAAATCAAAAAAATC	12.9	2.8e-07	-15088	6553
RHE_RS25970	R	RHE_RS08350_m5	R	-85	-58	GATAATTATATTTGTCCTCACGAAAATT	8.4	6.3e-06	-11975	5201
RHE_RS02490	R	RHE_RS08760_m1	R	-189	-171	TACTGATTTTATTTCAATA	9.1	7.9e-06	-11749	5102
RHE_RS05170	R	RHE_RS08760_m1	R	-99	-81	TCGTGAACAACGTTCATAA	10.6	2.7e-06	-12822	5569
RHE_RS05170	R	RHE_RS08760_m1	R	-63	-45	TCTTGAACGTCGTTCATGA	11.0	2.0e-06	-13122	5699
RHE_RS05170	R	RHE_RS08760_m1	R	-40	-22	TTTTGAACGACGTTCAAAA	9.2	7.4e-06	-11814	5131
RHE_RS08755	R	RHE_RS08760_m1	R	-115	-97	TGATGAGCAAAATTCAGCA	14.7	5.1e-08	-16791	7292
RHE_RS08760	D	RHE_RS08760_m1	D	-21	-3	TGATGAGCAAAATTCAGCA	14.7	5.1e-08	-16791	7292
RHE_RS14355	D	RHE_RS08760_m1	D	-20	-2	CTGTGACTTGAATTCATCA	9.0	8.4e-06	-11687	5076
RHE_RS18665	R	RHE_RS08760_m1	R	-54	-36	TGATGTACGTAAATCAAAA	8.8	9.6e-06	-11554	5018
RHE_RS05085	R	RHE_RS08760_m2	R	-206	-192	TTTCATACTATCAAT	10.6	1.4e-06	-13479	5854
RHE_RS26235	R	RHE_RS08760_m2	R	-73	-59	CATCATGCTGTCATT	9.8	5.8e-06	-12058	5237
RHE_RS31105	R	RHE_RS08760_m2	R	-95	-81	AATCATCGTGTCAGG	10.9	7.8e-07	-14064	6108
RHE_RS12285	D	RHE_RS08760_m3	D	-115	-106	CGTCAGCACC	11.1	2.7e-06	-12822	5569
RHE_RS02490	R	RHE_RS08760_m5	R	-189	-171	TACTGATTTTATTTCAATA	8.7	8.5e-06	-11675	5071
RHE_RS05170	R	RHE_RS08760_m5	R	-99	-81	TCGTGAACAACGTTCATAA	9.7	4.4e-06	-12334	5357
RHE_RS05170	R	RHE_RS08760_m5	R	-63	-45	TCTTGAACGTCGTTCATGA	11.0	1.7e-06	-13285	5770
RHE_RS05170	R	RHE_RS08760_m5	R	-40	-22	TTTTGAACGACGTTCAAAA	8.7	8.5e-06	-11675	5071
RHE_RS08755	R	RHE_RS08760_m5	R	-115	-97	TGATGAGCAAAATTCAGCA	13.7	1.8e-07	-15530	6745
RHE_RS08760	D	RHE_RS08760_m5	D	-21	-3	TGATGAGCAAAATTCAGCA	13.7	1.8e-07	-15530	6745
RHE_RS05735	D	RHE_RS08785_m1	D	-61	-42	GCTAGGAATCGTTCCAATTA	2.3	8.5e-06	-11675	5071
RHE_RS05945	R	RHE_RS08785_m1	R	-173	-154	GAATTAGAACGATCGATGCT	2.9	6.8e-06	-11899	5167
RHE_RS08785	D	RHE_RS08785_m1	D	-155	-136	GATTTAAATCGTTCCAAAAG	11.8	1.2e-07	-15936	6921
RHE_RS08785	D	RHE_RS08785_m1	D	-59	-40	TTTTTGGAACGTTCCAAATA	20.9	6.6e-11	-23441	10180
RHE_RS16120	D	RHE_RS08785_m1	D	-110	-91	TATTGGGAACGTTCCCACTA	5.3	2.6e-06	-12860	5585
RHE_RS18970	D	RHE_RS08785_m1	D	-204	-185	AATTTAAAACGTTATAAGCC	5.0	2.9e-06	-12751	5538
RHE_RS18970	D	RHE_RS08785_m1	D	-83	-64	AATTTAAAACGTTTTCATTG	3.8	4.9e-06	-12226	5310
RHE_RS27715	D	RHE_RS08785_m1	D	-87	-68	CATCTGGAACGATCAAAAGA	2.8	7.1e-06	-11855	5149
RHE_RS08785	D	RHE_RS08785_m2	D	-154	-135	ATTTAAATCGTTCCAAAAGT	7.8	5.2e-07	-14469	6284
RHE_RS08785	D	RHE_RS08785_m2	D	-58	-39	TTTTGGAACGTTCCAAATAA	21.7	4.3e-11	-23870	10367
RHE_RS16120	D	RHE_RS08785_m2	D	-109	-90	ATTGGGAACGTTCCCACTAT	0.9	8.9e-06	-11629	5051
RHE_RS16895	R	RHE_RS08785_m2	R	-242	-223	TTTCAGAATGATCTAATCGA	2.8	4.2e-06	-12380	5377
RHE_RS04310	D	RHE_RS08785_m3	D	-105	-94	TATTTGGAACTT	10.3	4.5e-06	-12311	5347
RHE_RS08785	D	RHE_RS08785_m3	D	-59	-48	TTTTTGGAACGT	12.6	8.7e-07	-13955	6060
RHE_RS31110	D	RHE_RS08785_m3	D	-312	-301	TGATTGGAACGT	11.2	2.0e-06	-13122	5699
RHE_RS05945	R	RHE_RS08785_m4	R	-174	-154	GAATTAGAACGATCGATGCTT	3.1	4.8e-06	-12247	5319
RHE_RS08785	D	RHE_RS08785_m4	D	-155	-135	GATTTAAATCGTTCCAAAAGT	12.8	6.5e-08	-16549	7187
RHE_RS08785	D	RHE_RS08785_m4	D	-59	-39	TTTTTGGAACGTTCCAAATAA	21.2	5.1e-11	-23699	10292
RHE_RS16120	D	RHE_RS08785_m4	D	-110	-90	TATTGGGAACGTTCCCACTAT	2.4	6.5e-06	-11944	5187
RHE_RS18970	D	RHE_RS08785_m4	D	-204	-184	AATTTAAAACGTTATAAGCCT	5.5	1.9e-06	-13174	5721
RHE_RS18970	D	RHE_RS08785_m4	D	-83	-63	AATTTAAAACGTTTTCATTGT	2.9	5.2e-06	-12167	5284
RHE_RS20665	D	RHE_RS08785_m4	D	-94	-74	TTAGCGGAACGTTCTATTTTC	2.9	5.2e-06	-12167	5284
RHE_RS27715	D	RHE_RS08785_m4	D	-87	-67	CATCTGGAACGATCAAAAGAG	1.6	8.8e-06	-11641	5056
RHE_RS05945	R	RHE_RS08785_m5	R	-174	-153	AGAATTAGAACGATCGATGCTT	4.4	4.2e-06	-12380	5377
RHE_RS08785	D	RHE_RS08785_m5	D	-156	-135	CGATTTAAATCGTTCCAAAAGT	10.2	3.0e-07	-15019	6523
RHE_RS08785	D	RHE_RS08785_m5	D	-60	-39	ATTTTTGGAACGTTCCAAATAA	21.5	3.8e-11	-23993	10420
RHE_RS16120	D	RHE_RS08785_m5	D	-111	-90	TTATTGGGAACGTTCCCACTAT	8.3	7.5e-07	-14103	6125
RHE_RS18970	D	RHE_RS08785_m5	D	-205	-184	CAATTTAAAACGTTATAAGCCT	3.4	6.3e-06	-11975	5201
RHE_RS18970	D	RHE_RS08785_m5	D	-84	-63	AAATTTAAAACGTTTTCATTGT	5.9	2.2e-06	-13027	5658
RHE_RS27715	D	RHE_RS08785_m5	D	-88	-67	TCATCTGGAACGATCAAAAGAG	4.6	4.0e-06	-12429	5398
RHE_RS10885	R	RHE_RS08920_m1	R	-234	-223	CGGGAGGATCAA	10.4	6.6e-06	-11928	5180
RHE_RS10890	D	RHE_RS08920_m1	D	-17	-6	CGGGAGGATCAA	10.4	6.6e-06	-11928	5180
RHE_RS06955	R	RHE_RS08920_m2	R	-327	-313	CTGGGAGGATGGGTC	8.6	3.3e-06	-12622	5481
RHE_RS09390	D	RHE_RS08920_m2	D	-395	-381	CTGGGAGGAGGAGTG	8.0	4.4e-06	-12334	5357
RHE_RS10885	R	RHE_RS08920_m2	R	-236	-222	CCGGGAGGATCAAGC	11.0	8.3e-07	-14002	6081
RHE_RS10890	D	RHE_RS08920_m2	D	-18	-4	CCGGGAGGATCAAGC	11.0	8.3e-07	-14002	6081
RHE_RS14700	D	RHE_RS08920_m2	D	-16	-2	CTGGGAGGATCCGAA	9.0	2.7e-06	-12822	5569
RHE_RS20810	D	RHE_RS08920_m2	D	-362	-348	CTGGGAGGAGGAGTG	8.0	4.4e-06	-12334	5357
RHE_RS00415	R	RHE_RS08920_m3	R	-142	-125	CGAGACTTTTCGCCATCA	7.9	9.6e-06	-11554	5018
RHE_RS12420	R	RHE_RS08920_m3	R	-246	-229	GCAGAAATACTGACATAG	10.7	1.5e-06	-13410	5824
RHE_RS16100	R	RHE_RS08920_m3	R	-210	-193	CCAGAATCATTGCCATGC	10.4	1.9e-06	-13174	5721
RHE_RS04985	R	RHE_RS08920_m4	R	-55	-34	AAAATATCCCCGTCCGAGAGAT	9.6	5.2e-06	-12167	5284
RHE_RS25905	R	RHE_RS08920_m4	R	-249	-228	AAAATATGCAAGCAGAGGAGGA	10.6	2.6e-06	-12860	5585
RHE_RS08920	D	RHE_RS08920_m5	D	-92	-79	TCATTATGCTCCGG	15.3	4.3e-08	-16962	7367
RHE_RS19065	D	RHE_RS08920_m5	D	-350	-337	GACTTATGCTCCGT	8.7	7.7e-06	-11774	5114
RHE_RS08925	R	RHE_RS08925_m1	R	-118	-90	CATAGTTTGCATAGAAAATGCAATCTCCT	17.4	5.7e-10	-21285	9244
RHE_RS20490	D	RHE_RS08925_m1	D	-80	-52	GTGACCGTGCATGTTGCATGCACAGTCTT	12.7	3.6e-07	-14837	6444
RHE_RS23635	R	RHE_RS08925_m1	R	-94	-66	ATTATTTTGCACAAAATATGCAGAAGAGA	13.6	1.3e-07	-15856	6886
RHE_RS23640	D	RHE_RS08925_m1	D	-102	-74	ATTATTTTGCACAAAATATGCAGAAGAGA	13.6	1.3e-07	-15856	6886
RHE_RS28710	D	RHE_RS08925_m1	D	-53	-25	CGCATACTGCATATAATTCGCATAATTAG	10.5	3.0e-06	-12717	5523
RHE_RS05855	R	RHE_RS08925_m2	R	-81	-68	ATATCGTGCATTTT	9.6	9.4e-06	-11575	5027
RHE_RS08925	R	RHE_RS08925_m2	R	-41	-28	GGGTCGTGCATAAA	13.8	5.9e-08	-16646	7229
RHE_RS08925	R	RHE_RS08925_m3	R	-41	-19	AATGCTCACGGGTCGTGCATAAA	16.9	4.9e-09	-19134	8310
RHE_RS20490	D	RHE_RS08925_m3	D	-77	-55	ACCGTGCATGTTGCATGCACAGT	7.9	9.2e-06	-11596	5036
RHE_RS23885	D	RHE_RS08925_m3	D	-33	-11	AATGTGCACGGGCTGTGCGGAGT	12.6	3.1e-07	-14987	6509
RHE_RS08925	R	RHE_RS08925_m4	R	-79	-61	AACGCAAGAACTTTGCACG	11.6	1.2e-06	-13633	5921
RHE_RS08925	R	RHE_RS08925_m4	R	-68	-50	TGCGCATAAAGAACGCAAG	10.0	7.7e-06	-11774	5114
RHE_RS08925	R	RHE_RS08925_m4	R	-39	-21	TGCTCACGGGTCGTGCATA	11.3	1.8e-06	-13228	5745
RHE_RS15870	R	RHE_RS08925_m4	R	-77	-59	TGCTCATAGTTTATGCAAA	11.1	2.3e-06	-12983	5638
RHE_RS20490	D	RHE_RS08925_m4	D	-75	-57	CGTGCATGTTGCATGCACA	11.3	1.8e-06	-13228	5745
RHE_RS27165	D	RHE_RS08925_m4	D	-127	-109	CGAGCAAGACACTTGCAAG	10.0	7.7e-06	-11774	5114
RHE_RS00690	R	RHE_RS08925_m5	R	-136	-123	CGATTGGATGCACG	9.8	9.0e-06	-11618	5046
RHE_RS31110	D	RHE_RS08925_m5	D	-360	-347	ACATTTCTCGCAAA	9.8	9.0e-06	-11618	5046
RHE_RS09015	D	RHE_RS09015_m1	D	-72	-56	TTATGATCGTTATCTTT	14.7	3.7e-08	-17112	7432
RHE_RS09015	D	RHE_RS09015_m1	D	-50	-34	TTATGATTGTAATCCAT	16.2	3.5e-09	-19471	8456
RHE_RS09015	D	RHE_RS09015_m2	D	-78	-67	TCTGGATTATGA	14.0	3.6e-07	-14837	6444
RHE_RS09015	D	RHE_RS09015_m2	D	-56	-45	TAAGGATTATGA	11.2	2.0e-06	-13122	5699
RHE_RS14765	R	RHE_RS09015_m2	R	-113	-102	CATGGATTATGA	12.0	1.0e-06	-13816	6000
RHE_RS14770	D	RHE_RS09015_m2	D	-72	-61	CATGGATTATGA	12.0	1.0e-06	-13816	6000
RHE_RS09015	D	RHE_RS09015_m3	D	-72	-55	TTATGATCGTTATCTTTA	17.0	1.6e-09	-20253	8796
RHE_RS09015	D	RHE_RS09015_m3	D	-50	-33	TTATGATTGTAATCCATG	17.1	1.3e-09	-20461	8886
RHE_RS06405	D	RHE_RS09015_m4	D	-256	-239	TTACAATCGTACTGCTTC	6.9	4.7e-06	-12268	5328
RHE_RS09015	D	RHE_RS09015_m4	D	-72	-55	TTATGATCGTTATCTTTA	17.5	4.0e-09	-19337	8398
RHE_RS09015	D	RHE_RS09015_m4	D	-50	-33	TTATGATTGTAATCCATG	18.0	2.4e-09	-19848	8620
RHE_RS16435	D	RHE_RS09015_m4	D	-149	-132	TTACCGTCGTTATCCACG	10.2	7.7e-07	-14077	6114
RHE_RS06405	D	RHE_RS09015_m5	D	-262	-239	TGTGAATTACAATCGTACTGCTTC	4.1	4.2e-06	-12380	5377
RHE_RS09015	D	RHE_RS09015_m5	D	-78	-55	TCTGGATTATGATCGTTATCTTTA	23.6	5.6e-12	-25908	11252
RHE_RS09015	D	RHE_RS09015_m5	D	-56	-33	TAAGGATTATGATTGTAATCCATG	23.4	7.2e-12	-25657	11143
RHE_RS16435	D	RHE_RS09015_m5	D	-155	-132	TGGAAATTACCGTCGTTATCCACG	4.8	3.0e-06	-12717	5523
RHE_RS09025	D	RHE_RS09025_m1	D	-58	-38	GCTATCGAAAAAACGGAGATA	8.1	8.2e-06	-11711	5086
RHE_RS09025	D	RHE_RS09025_m1	D	-34	-14	TCGATCGAAACTATCGACGGA	11.4	8.5e-07	-13978	6071
RHE_RS09025	D	RHE_RS09025_m1	D	-25	-5	ACTATCGACGGAATGGATGGA	15.6	2.1e-08	-17679	7678
RHE_RS31005	D	RHE_RS09025_m1	D	-52	-32	AAAATCGATTGTTTGGATATA	9.6	3.1e-06	-12684	5509
RHE_RS09025	D	RHE_RS09025_m2	D	-59	-49	TGCTATCGAAA	10.4	3.3e-06	-12622	5481
RHE_RS16760	D	RHE_RS09025_m2	D	-177	-167	CACTATCGATA	10.0	5.8e-06	-12058	5237
RHE_RS04545	R	RHE_RS09025_m3	R	-115	-95	TCGATCGATAAGATGGCTAGG	7.8	9.1e-06	-11607	5041
RHE_RS09025	D	RHE_RS09025_m3	D	-58	-38	GCTATCGAAAAAACGGAGATA	7.7	9.6e-06	-11554	5018
RHE_RS09025	D	RHE_RS09025_m3	D	-34	-14	TCGATCGAAACTATCGACGGA	11.6	7.2e-07	-14144	6143
RHE_RS09025	D	RHE_RS09025_m3	D	-25	-5	ACTATCGACGGAATGGATGGA	15.3	3.2e-08	-17258	7495
RHE_RS31005	D	RHE_RS09025_m3	D	-52	-32	AAAATCGATTGTTTGGATATA	9.2	3.8e-06	-12481	5420
RHE_RS02340	R	RHE_RS09025_m4	R	-91	-62	TATTGATGATGTGCATCATTAATATGGGCG	7.9	1.1e-06	-13720	5959
RHE_RS06820	D	RHE_RS09025_m4	D	-208	-179	TGGCGATCGAATCCGTCGCCAATGTCGACG	5.7	3.6e-06	-12535	5444
RHE_RS09025	D	RHE_RS09025_m4	D	-45	-16	CGGAGATAATGTCGATCGAAACTATCGACG	25.4	4.5e-13	-28430	12347
RHE_RS09025	D	RHE_RS09025_m4	D	-36	-7	TGTCGATCGAAACTATCGACGGAATGGATG	20.2	1.8e-10	-22438	9745
RHE_RS13150	D	RHE_RS09025_m4	D	-157	-128	TATCAATAGAGTAGAACGATGCATTCAATA	6.6	2.2e-06	-13027	5658
RHE_RS26495	R	RHE_RS09025_m4	R	-80	-51	CGGCGATAGTTTTGAACGGCAGTATAAAAC	13.9	2.8e-08	-17391	7553
RHE_RS16760	D	RHE_RS09025_m5	D	-176	-156	ACTATCGATATCGCTGATATT	8.1	6.4e-06	-11959	5194
RHE_RS09045	R	RHE_RS09045_m1	R	-22	-9	AACCTTCGAAAAAA	11.4	1.5e-06	-13410	5824
RHE_RS24090	D	RHE_RS09045_m1	D	-38	-25	TTCTTTCGAAGTAT	10.3	4.9e-06	-12226	5310
RHE_RS26495	R	RHE_RS09045_m1	R	-106	-93	AACCTTGGAAGGAA	9.9	7.2e-06	-11841	5143
[truncated: 4,917 more rows]
