# Supplementary material for: Rhizobium etli CFN42 and Sinorhizobium meliloti 1021 bioinformatic transcriptional regulatory networks from culture and symbiosis
Source: Front Bioinform. 2024 Aug 28;4:1419274. doi: 10.3389/fbinf.2024.1419274 (PMC11387232; doi:10.3389/fbinf.2024.1419274)
Supplement: Supplementary file 5 [file Table1.xlsx]

## Sheet: Hoja1
															b) Bacteroide Matrix-clustering R. etli CFN42
a) Matrix-clustering MM R. etli CFN42											data for network	data for network			Bacteroid	TFs from clusters										Data for network	Data for network
MM	TFs from clusters							1211 unique genes			Mix 1212 genes unique	380 Tfs unique							365 unique Tfs			467 targets cluster asociated				940 Unique genes	365 unique Tfs
cluster_3				380 Tfs unique				RHE_RS00015			RHE_RS33140	RHE_RS33140							RHE_RS03720			RHE_RS00095				RHE_RS03720	RHE_RS03720
RHE_RS02835	RHE_RS02835			RHE_RS33140				RHE_RS00040			RHE_RS32675	RHE_RS32675			cluster_2				RHE_RS00185			RHE_RS00185				RHE_RS00185	RHE_RS00185
RHE_RS06175	RHE_RS06175			RHE_RS32675				RHE_RS00045			RHE_RS32555	RHE_RS32555			RHE_RS03720	RHE_RS03720			RHE_RS00285			RHE_RS00185				RHE_RS00285	RHE_RS00285
RHE_RS31225				RHE_RS32555				RHE_RS00065			RHE_RS32435	RHE_RS32435			RHE_RS01300				RHE_RS00340			RHE_RS00195				RHE_RS00340	RHE_RS00340
				RHE_RS32435				RHE_RS00070			RHE_RS32370	RHE_RS32370			RHE_RS11520				RHE_RS00415			RHE_RS00195				RHE_RS00415	RHE_RS00415
				RHE_RS32370				RHE_RS00105			RHE_RS31500	RHE_RS31500							RHE_RS00725			RHE_RS00280				RHE_RS00725	RHE_RS00725
				RHE_RS31500				RHE_RS00155			RHE_RS30790	RHE_RS30790							RHE_RS00765			RHE_RS00285				RHE_RS00765	RHE_RS00765
cluster_4				RHE_RS30790				RHE_RS00185			RHE_RS30745	RHE_RS30745							RHE_RS00855			RHE_RS00340				RHE_RS00855	RHE_RS00855
RHE_RS01135				RHE_RS30745				RHE_RS00190			RHE_RS30570	RHE_RS30570			cluster_3				RHE_RS01095			RHE_RS00395				RHE_RS01095	RHE_RS01095
RHE_RS22940				RHE_RS30570				RHE_RS00245			RHE_RS30470	RHE_RS30470			RHE_RS12760				RHE_RS01265			RHE_RS00415				RHE_RS01265	RHE_RS01265
RHE_RS10520				RHE_RS30470				RHE_RS00250			RHE_RS30310	RHE_RS30310			RHE_RS10885				RHE_RS01350			RHE_RS00415				RHE_RS01350	RHE_RS01350
RHE_RS06195				RHE_RS30310				RHE_RS00255			RHE_RS30285	RHE_RS30285			RHE_RS10890	RHE_RS10890			RHE_RS01410			RHE_RS00490				RHE_RS01410	RHE_RS01410
RHE_RS03380				RHE_RS30285				RHE_RS00275			RHE_RS30095	RHE_RS30095			RHE_RS02355	RHE_RS02355			RHE_RS01430			RHE_RS00580				RHE_RS01430	RHE_RS01430
RHE_RS03405				RHE_RS30095				RHE_RS00285			RHE_RS29975	RHE_RS29975							RHE_RS01480			RHE_RS00690				RHE_RS01480	RHE_RS01480
RHE_RS17200	RHE_RS17200			RHE_RS29975				RHE_RS00300			RHE_RS29840	RHE_RS29840							RHE_RS01660			RHE_RS00690				RHE_RS01660	RHE_RS01660
RHE_RS11005				RHE_RS29840				RHE_RS00340			RHE_RS29775	RHE_RS29775							RHE_RS01720			RHE_RS00690				RHE_RS01720	RHE_RS01720
RHE_RS09500				RHE_RS29775				RHE_RS00365			RHE_RS29630	RHE_RS29630			cluster_5				RHE_RS01740			RHE_RS00690				RHE_RS01740	RHE_RS01740
				RHE_RS29630				RHE_RS00380			RHE_RS29535	RHE_RS29535			RHE_RS12200				RHE_RS02045			RHE_RS00725				RHE_RS02045	RHE_RS02045
				RHE_RS29535				RHE_RS00410			RHE_RS29400	RHE_RS29400			RHE_RS25465				RHE_RS02165			RHE_RS00725				RHE_RS02165	RHE_RS02165
				RHE_RS29400				RHE_RS00415			RHE_RS29335	RHE_RS29335			RHE_RS26720	RHE_RS26720			RHE_RS02310			RHE_RS00730				RHE_RS02310	RHE_RS02310
cluster_5				RHE_RS29335				RHE_RS00460			RHE_RS29205	RHE_RS29205			RHE_RS25455	RHE_RS25455			RHE_RS02315			RHE_RS00730				RHE_RS02315	RHE_RS02315
RHE_RS02695				RHE_RS29205				RHE_RS00465			RHE_RS29200	RHE_RS29200			RHE_RS12205	RHE_RS12205			RHE_RS02340			RHE_RS00765				RHE_RS02340	RHE_RS02340
RHE_RS00870				RHE_RS29200				RHE_RS00475			RHE_RS29195	RHE_RS29195							RHE_RS02355			RHE_RS00765				RHE_RS02355	RHE_RS02355
RHE_RS08405				RHE_RS29195				RHE_RS00480			RHE_RS29080	RHE_RS29080							RHE_RS02400			RHE_RS00765				RHE_RS02400	RHE_RS02400
RHE_RS04955				RHE_RS29080				RHE_RS00495			RHE_RS29075	RHE_RS29075							RHE_RS02600			RHE_RS00765				RHE_RS02600	RHE_RS02600
RHE_RS04950				RHE_RS29075				RHE_RS00525			RHE_RS28890	RHE_RS28890			cluster_6				RHE_RS02710			RHE_RS00815				RHE_RS02710	RHE_RS02710
RHE_RS08410				RHE_RS28890				RHE_RS00550			RHE_RS28855	RHE_RS28855			RHE_RS01655				RHE_RS02715			RHE_RS00815				RHE_RS02715	RHE_RS02715
RHE_RS06435				RHE_RS28855				RHE_RS00575			RHE_RS28725	RHE_RS28725			RHE_RS01660	RHE_RS01660			RHE_RS02765			RHE_RS00815				RHE_RS02765	RHE_RS02765
RHE_RS06580	RHE_RS06580			RHE_RS28725				RHE_RS00595			RHE_RS28710	RHE_RS28710							RHE_RS02835			RHE_RS00850				RHE_RS02835	RHE_RS02835
				RHE_RS28710				RHE_RS00670			RHE_RS28695	RHE_RS28695							RHE_RS02855			RHE_RS00850				RHE_RS02855	RHE_RS02855
				RHE_RS28695				RHE_RS00680			RHE_RS28665	RHE_RS28665							RHE_RS03000			RHE_RS00850				RHE_RS03000	RHE_RS03000
				RHE_RS28665				RHE_RS00695			RHE_RS28625	RHE_RS28625			cluster_8				RHE_RS03040			RHE_RS00855				RHE_RS03040	RHE_RS03040
cluster_15				RHE_RS28625				RHE_RS00700			RHE_RS28555	RHE_RS28555			RHE_RS14770	RHE_RS14770			RHE_RS03175			RHE_RS00855				RHE_RS03175	RHE_RS03175
RHE_RS18650	RHE_RS18650			RHE_RS28555				RHE_RS00705			RHE_RS28545	RHE_RS28545			RHE_RS14765				RHE_RS03180			RHE_RS00855				RHE_RS03180	RHE_RS03180
RHE_RS27970				RHE_RS28545				RHE_RS00725			RHE_RS28510	RHE_RS28510							RHE_RS03210			RHE_RS00955				RHE_RS03210	RHE_RS03210
				RHE_RS28510				RHE_RS00735			RHE_RS28450	RHE_RS28450							RHE_RS03275			RHE_RS01030				RHE_RS03275	RHE_RS03275
				RHE_RS28450				RHE_RS00740			RHE_RS28370	RHE_RS28370							RHE_RS03430			RHE_RS01030				RHE_RS03430	RHE_RS03430
				RHE_RS28370				RHE_RS00745			RHE_RS28340	RHE_RS28340			cluster_9				RHE_RS03515			RHE_RS01030				RHE_RS03515	RHE_RS03515
cluster_18				RHE_RS28340				RHE_RS00760			RHE_RS28305	RHE_RS28305			RHE_RS05265	RHE_RS05265			RHE_RS03595			RHE_RS01095				RHE_RS03595	RHE_RS03595
RHE_RS23190				RHE_RS28305				RHE_RS00765			RHE_RS28220	RHE_RS28220			RHE_RS25640				RHE_RS03610			RHE_RS01125				RHE_RS03610	RHE_RS03610
RHE_RS14885				RHE_RS28220				RHE_RS00855			RHE_RS28045	RHE_RS28045			RHE_RS15880				RHE_RS03720			RHE_RS01170				RHE_RS03720	RHE_RS03720
RHE_RS16235				RHE_RS28045				RHE_RS00870			RHE_RS28020	RHE_RS28020			RHE_RS15740				RHE_RS03775			RHE_RS01185				RHE_RS03775	RHE_RS03775
RHE_RS03175	RHE_RS03175			RHE_RS28020				RHE_RS00880			RHE_RS28010	RHE_RS28010			RHE_RS01030				RHE_RS04010			RHE_RS01185				RHE_RS04010	RHE_RS04010
RHE_RS16230	RHE_RS16230			RHE_RS28010				RHE_RS00885			RHE_RS27935	RHE_RS27935			RHE_RS06395				RHE_RS04025			RHE_RS01265				RHE_RS04025	RHE_RS04025
RHE_RS19670	RHE_RS19670			RHE_RS27935				RHE_RS00895			RHE_RS27930	RHE_RS27930			RHE_RS19065				RHE_RS04030			RHE_RS01300				RHE_RS04030	RHE_RS04030
RHE_RS05915	RHE_RS05915			RHE_RS27930				RHE_RS00990			RHE_RS27925	RHE_RS27925			RHE_RS20045				RHE_RS04310			RHE_RS01340				RHE_RS04310	RHE_RS04310
RHE_RS09130	RHE_RS09130			RHE_RS27925				RHE_RS00995			RHE_RS27920	RHE_RS27920			RHE_RS24190				RHE_RS04315			RHE_RS01345				RHE_RS04315	RHE_RS04315
RHE_RS09995				RHE_RS27920				RHE_RS01005			RHE_RS27845	RHE_RS27845			RHE_RS27975				RHE_RS04575			RHE_RS01345				RHE_RS04575	RHE_RS04575
				RHE_RS27845				RHE_RS01020			RHE_RS27750	RHE_RS27750			RHE_RS02190				RHE_RS04625			RHE_RS01350				RHE_RS04625	RHE_RS04625
				RHE_RS27750				RHE_RS01035			RHE_RS27645	RHE_RS27645			RHE_RS06380				RHE_RS04645			RHE_RS01350				RHE_RS04645	RHE_RS04645
				RHE_RS27645				RHE_RS01055			RHE_RS27600	RHE_RS27600			RHE_RS06680				RHE_RS04655			RHE_RS01355				RHE_RS04655	RHE_RS04655
cluster_22				RHE_RS27600				RHE_RS01075			RHE_RS27570	RHE_RS27570			RHE_RS25805				RHE_RS04705			RHE_RS01390				RHE_RS04705	RHE_RS04705
RHE_RS28665	RHE_RS28665			RHE_RS27570				RHE_RS01080			RHE_RS27560	RHE_RS27560			RHE_RS29390				RHE_RS05000			RHE_RS01410				RHE_RS05000	RHE_RS05000
RHE_RS16235				RHE_RS27560				RHE_RS01095			RHE_RS27525	RHE_RS27525			RHE_RS13275				RHE_RS05020			RHE_RS01430				RHE_RS05020	RHE_RS05020
RHE_RS25595	RHE_RS25595			RHE_RS27525				RHE_RS01135			RHE_RS27470	RHE_RS27470			RHE_RS27645	RHE_RS27645			RHE_RS05170			RHE_RS01430				RHE_RS05170	RHE_RS05170
RHE_RS16230	RHE_RS16230			RHE_RS27470				RHE_RS01155			RHE_RS27460	RHE_RS27460			RHE_RS12420				RHE_RS05255			RHE_RS01465				RHE_RS05255	RHE_RS05255
RHE_RS23065	RHE_RS23065			RHE_RS27460				RHE_RS01160			RHE_RS27415	RHE_RS27415			RHE_RS09410				RHE_RS05265			RHE_RS01480				RHE_RS05265	RHE_RS05265
				RHE_RS27415				RHE_RS01250			RHE_RS27310	RHE_RS27310							RHE_RS05315			RHE_RS01480				RHE_RS05315	RHE_RS05315
				RHE_RS27310				RHE_RS01260			RHE_RS27280	RHE_RS27280							RHE_RS05330			RHE_RS01495				RHE_RS05330	RHE_RS05330
				RHE_RS27280				RHE_RS01265			RHE_RS27240	RHE_RS27240							RHE_RS05380			RHE_RS01645				RHE_RS05380	RHE_RS05380
cluster_23				RHE_RS27240				RHE_RS01315			RHE_RS27195	RHE_RS27195			cluster_13				RHE_RS05415			RHE_RS01655				RHE_RS05415	RHE_RS05415
RHE_RS23365				RHE_RS27195				RHE_RS01320			RHE_RS27185	RHE_RS27185			RHE_RS17830				RHE_RS05495			RHE_RS01655				RHE_RS05495	RHE_RS05495
RHE_RS12585	RHE_RS12585			RHE_RS27185				RHE_RS01350			RHE_RS27050	RHE_RS27050			RHE_RS17835	RHE_RS17835			RHE_RS05730			RHE_RS01655				RHE_RS05730	RHE_RS05730
RHE_RS12580				RHE_RS27050				RHE_RS01360			RHE_RS26875	RHE_RS26875							RHE_RS05735			RHE_RS01660				RHE_RS05735	RHE_RS05735
RHE_RS18615				RHE_RS26875				RHE_RS01430			RHE_RS26840	RHE_RS26840							RHE_RS05750			RHE_RS01660				RHE_RS05750	RHE_RS05750
RHE_RS23370				RHE_RS26840				RHE_RS01445			RHE_RS26800	RHE_RS26800							RHE_RS05790			RHE_RS01660				RHE_RS05790	RHE_RS05790
				RHE_RS26800				RHE_RS01475			RHE_RS26795	RHE_RS26795			cluster_14				RHE_RS05815			RHE_RS01720				RHE_RS05815	RHE_RS05815
				RHE_RS26795				RHE_RS01480			RHE_RS26790	RHE_RS26790			RHE_RS23350	RHE_RS23350			RHE_RS05855			RHE_RS01740				RHE_RS05855	RHE_RS05855
				RHE_RS26790				RHE_RS01540			RHE_RS26765	RHE_RS26765			RHE_RS17450	RHE_RS17450			RHE_RS05915			RHE_RS01740				RHE_RS05915	RHE_RS05915
cluster_24				RHE_RS26765				RHE_RS01545			RHE_RS26720	RHE_RS26720			RHE_RS18650	RHE_RS18650			RHE_RS05945			RHE_RS01740				RHE_RS05945	RHE_RS05945
RHE_RS23550				RHE_RS26720				RHE_RS01550			RHE_RS26695	RHE_RS26695			RHE_RS24110	RHE_RS24110			RHE_RS06015			RHE_RS01775				RHE_RS06015	RHE_RS06015
RHE_RS23570				RHE_RS26695				RHE_RS01630			RHE_RS26680	RHE_RS26680			RHE_RS22600				RHE_RS06025			RHE_RS01780				RHE_RS06025	RHE_RS06025
RHE_RS23555	RHE_RS23555			RHE_RS26680				RHE_RS01660			RHE_RS26635	RHE_RS26635			RHE_RS22605	RHE_RS22605			RHE_RS06105			RHE_RS01790				RHE_RS06105	RHE_RS06105
RHE_RS23585				RHE_RS26635				RHE_RS01675			RHE_RS26495	RHE_RS26495							RHE_RS06135			RHE_RS01840				RHE_RS06135	RHE_RS06135
RHE_RS09130	RHE_RS09130			RHE_RS26495				RHE_RS01700			RHE_RS26465	RHE_RS26465							RHE_RS06175			RHE_RS01930				RHE_RS06175	RHE_RS06175
RHE_RS15755	RHE_RS15755			RHE_RS26465				RHE_RS01720			RHE_RS26355	RHE_RS26355							RHE_RS06215			RHE_RS01975				RHE_RS06215	RHE_RS06215
				RHE_RS26355				RHE_RS01735			RHE_RS26290	RHE_RS26290			cluster_15				RHE_RS06405			RHE_RS01975				RHE_RS06405	RHE_RS06405
				RHE_RS26290				RHE_RS01740			RHE_RS26280	RHE_RS26280			RHE_RS30545				RHE_RS06535			RHE_RS02045				RHE_RS06535	RHE_RS06535
				RHE_RS26280				RHE_RS01815			RHE_RS26115	RHE_RS26115			RHE_RS05915	RHE_RS05915			RHE_RS06555			RHE_RS02045				RHE_RS06555	RHE_RS06555
cluster_26				RHE_RS26115				RHE_RS01845			RHE_RS26070	RHE_RS26070			RHE_RS19670	RHE_RS19670			RHE_RS06580			RHE_RS02045				RHE_RS06580	RHE_RS06580
RHE_RS26730				RHE_RS26070				RHE_RS01855			RHE_RS26040	RHE_RS26040							RHE_RS06620			RHE_RS02045				RHE_RS06620	RHE_RS06620
RHE_RS26720	RHE_RS26720			RHE_RS26040				RHE_RS01870			RHE_RS26015	RHE_RS26015							RHE_RS06705			RHE_RS02130				RHE_RS06705	RHE_RS06705
RHE_RS25455	RHE_RS25455			RHE_RS26015				RHE_RS01925			RHE_RS26000	RHE_RS26000							RHE_RS06825			RHE_RS02135				RHE_RS06825	RHE_RS06825
RHE_RS12205	RHE_RS12205			RHE_RS26000				RHE_RS01935			RHE_RS25970	RHE_RS25970			cluster_16				RHE_RS06845			RHE_RS02135				RHE_RS06845	RHE_RS06845
				RHE_RS25970				RHE_RS01980			RHE_RS25905	RHE_RS25905			RHE_RS22770	RHE_RS22770			RHE_RS06875			RHE_RS02140				RHE_RS06875	RHE_RS06875
				RHE_RS25905				RHE_RS01995			RHE_RS25840	RHE_RS25840			RHE_RS17105				RHE_RS06955			RHE_RS02165				RHE_RS06955	RHE_RS06955
				RHE_RS25840				RHE_RS02015			RHE_RS25835	RHE_RS25835							RHE_RS07105			RHE_RS02190				RHE_RS07105	RHE_RS07105
cluster_27				RHE_RS25835				RHE_RS02045			RHE_RS25725	RHE_RS25725							RHE_RS07110			RHE_RS02190				RHE_RS07110	RHE_RS07110
RHE_RS13745				RHE_RS25725				RHE_RS02055			RHE_RS25605	RHE_RS25605							RHE_RS07210			RHE_RS02195				RHE_RS07210	RHE_RS07210
RHE_RS05105				RHE_RS25605				RHE_RS02060			RHE_RS25595	RHE_RS25595			cluster_19				RHE_RS07480			RHE_RS02195				RHE_RS07480	RHE_RS07480
RHE_RS26000	RHE_RS26000			RHE_RS25595				RHE_RS02070			RHE_RS25560	RHE_RS25560			RHE_RS23835	RHE_RS23835			RHE_RS07685			RHE_RS02230				RHE_RS07685	RHE_RS07685
RHE_RS21400				RHE_RS25560				RHE_RS02075			RHE_RS25540	RHE_RS25540			RHE_RS06705	RHE_RS06705			RHE_RS07835			RHE_RS02290				RHE_RS07835	RHE_RS07835
RHE_RS19330				RHE_RS25540				RHE_RS02080			RHE_RS25455	RHE_RS25455			RHE_RS23840				RHE_RS07925			RHE_RS02310				RHE_RS07925	RHE_RS07925
				RHE_RS25455				RHE_RS02115			RHE_RS25290	RHE_RS25290							RHE_RS08025			RHE_RS02315				RHE_RS08025	RHE_RS08025
				RHE_RS25290				RHE_RS02120			RHE_RS25185	RHE_RS25185							RHE_RS08350			RHE_RS02330				RHE_RS08350	RHE_RS08350
				RHE_RS25185				RHE_RS02165			RHE_RS25060	RHE_RS25060							RHE_RS08760			RHE_RS02330				RHE_RS08760	RHE_RS08760
cluster_30				RHE_RS25060				RHE_RS02235			RHE_RS25040	RHE_RS25040			cluster_20				RHE_RS08785			RHE_RS02330				RHE_RS08785	RHE_RS08785
RHE_RS27520				RHE_RS25040				RHE_RS02310			RHE_RS24980	RHE_RS24980			RHE_RS26605				RHE_RS08920			RHE_RS02340				RHE_RS08920	RHE_RS08920
RHE_RS27525	RHE_RS27525			RHE_RS24980				RHE_RS02315			RHE_RS24850	RHE_RS24850			RHE_RS02595				RHE_RS08925			RHE_RS02340				RHE_RS08925	RHE_RS08925
				RHE_RS24850				RHE_RS02320			RHE_RS24760	RHE_RS24760			RHE_RS15480				RHE_RS09015			RHE_RS02345				RHE_RS09015	RHE_RS09015
				RHE_RS24760				RHE_RS02340			RHE_RS24755	RHE_RS24755			RHE_RS06535	RHE_RS06535			RHE_RS09025			RHE_RS02345				RHE_RS09025	RHE_RS09025
				RHE_RS24755				RHE_RS02355			RHE_RS24735	RHE_RS24735							RHE_RS09045			RHE_RS02355				RHE_RS09045	RHE_RS09045
cluster_31				RHE_RS24735				RHE_RS02365			RHE_RS24725	RHE_RS24725							RHE_RS09080			RHE_RS02355				RHE_RS09080	RHE_RS09080
RHE_RS19545	RHE_RS19545			RHE_RS24725				RHE_RS02410			RHE_RS24620	RHE_RS24620							RHE_RS09130			RHE_RS02355				RHE_RS09130	RHE_RS09130
RHE_RS11860	RHE_RS11860			RHE_RS24620				RHE_RS02485			RHE_RS24540	RHE_RS24540			cluster_21				RHE_RS09445			RHE_RS02385				RHE_RS09445	RHE_RS09445
RHE_RS19540				RHE_RS24540				RHE_RS02560			RHE_RS24475	RHE_RS24475			RHE_RS25465				RHE_RS10220			RHE_RS02385				RHE_RS10220	RHE_RS10220
RHE_RS27645	RHE_RS27645			RHE_RS24475				RHE_RS02600			RHE_RS24350	RHE_RS24350			RHE_RS15180				RHE_RS10425			RHE_RS02395				RHE_RS10425	RHE_RS10425
				RHE_RS24350				RHE_RS02610			RHE_RS24110	RHE_RS24110			RHE_RS29445				RHE_RS10445			RHE_RS02400				RHE_RS10445	RHE_RS10445
				RHE_RS24110				RHE_RS02615			RHE_RS24095	RHE_RS24095			RHE_RS18560	RHE_RS18560			RHE_RS10485			RHE_RS02420				RHE_RS10485	RHE_RS10485
				RHE_RS24095				RHE_RS02620			RHE_RS24090	RHE_RS24090			RHE_RS25455	RHE_RS25455			RHE_RS10510			RHE_RS02425				RHE_RS10510	RHE_RS10510
cluster_35				RHE_RS24090				RHE_RS02635			RHE_RS23945	RHE_RS23945							RHE_RS10545			RHE_RS02425				RHE_RS10545	RHE_RS10545
RHE_RS03515	RHE_RS03515			RHE_RS23945				RHE_RS02675			RHE_RS23885	RHE_RS23885							RHE_RS10580			RHE_RS02425				RHE_RS10580	RHE_RS10580
RHE_RS16660				RHE_RS23885				RHE_RS02695			RHE_RS23835	RHE_RS23835							RHE_RS10640			RHE_RS02430				RHE_RS10640	RHE_RS10640
RHE_RS27520				RHE_RS23835				RHE_RS02710			RHE_RS23775	RHE_RS23775			cluster_23				RHE_RS10890			RHE_RS02430				RHE_RS10890	RHE_RS10890
RHE_RS03520				RHE_RS23775				RHE_RS02715			RHE_RS23695	RHE_RS23695			RHE_RS26000	RHE_RS26000			RHE_RS10960			RHE_RS02430				RHE_RS10960	RHE_RS10960
RHE_RS27525	RHE_RS27525			RHE_RS23695				RHE_RS02725			RHE_RS23665	RHE_RS23665			RHE_RS09750				RHE_RS11075			RHE_RS02490				RHE_RS11075	RHE_RS11075
				RHE_RS23665				RHE_RS02750			RHE_RS23635	RHE_RS23635							RHE_RS11340			RHE_RS02490				RHE_RS11340	RHE_RS11340
				RHE_RS23635				RHE_RS02765			RHE_RS23555	RHE_RS23555							RHE_RS11690			RHE_RS02555				RHE_RS11690	RHE_RS11690
				RHE_RS23555				RHE_RS02770			RHE_RS23540	RHE_RS23540							RHE_RS11740			RHE_RS02570				RHE_RS11740	RHE_RS11740
cluster_36				RHE_RS23540				RHE_RS02780			RHE_RS23520	RHE_RS23520			cluster_27				RHE_RS11860			RHE_RS02570				RHE_RS11860	RHE_RS11860
RHE_RS11075	RHE_RS11075			RHE_RS23520				RHE_RS02810			RHE_RS23470	RHE_RS23470			RHE_RS27645	RHE_RS27645			RHE_RS12035			RHE_RS02570				RHE_RS12035	RHE_RS12035
RHE_RS25540	RHE_RS25540			RHE_RS23470				RHE_RS02835			RHE_RS23465	RHE_RS23465			RHE_RS04225				RHE_RS12060			RHE_RS02580				RHE_RS12060	RHE_RS12060
RHE_RS18590				RHE_RS23465				RHE_RS02850			RHE_RS23350	RHE_RS23350							RHE_RS12065			RHE_RS02595				RHE_RS12065	RHE_RS12065
RHE_RS25545				RHE_RS23350				RHE_RS02855			RHE_RS23325	RHE_RS23325							RHE_RS12205			RHE_RS02595				RHE_RS12205	RHE_RS12205
				RHE_RS23325				RHE_RS02910			RHE_RS23180	RHE_RS23180							RHE_RS12325			RHE_RS02600				RHE_RS12325	RHE_RS12325
				RHE_RS23180				RHE_RS02955			RHE_RS23130	RHE_RS23130			cluster_31				RHE_RS12415			RHE_RS02600				RHE_RS12415	RHE_RS12415
				RHE_RS23130				RHE_RS03000			RHE_RS23080	RHE_RS23080			RHE_RS02835	RHE_RS02835			RHE_RS12520			RHE_RS02600				RHE_RS12520	RHE_RS12520
cluster_38				RHE_RS23080				RHE_RS03025			RHE_RS23065	RHE_RS23065			RHE_RS00815				RHE_RS12585			RHE_RS02640				RHE_RS12585	RHE_RS12585
RHE_RS11740	RHE_RS11740			RHE_RS23065				RHE_RS03030			RHE_RS23055	RHE_RS23055			RHE_RS22245				RHE_RS12620			RHE_RS02640				RHE_RS12620	RHE_RS12620
RHE_RS25540	RHE_RS25540			RHE_RS23055				RHE_RS03040			RHE_RS22955	RHE_RS22955			RHE_RS06175	RHE_RS06175			RHE_RS12670			RHE_RS02645				RHE_RS12670	RHE_RS12670
RHE_RS19270				RHE_RS22955				RHE_RS03085			RHE_RS22830	RHE_RS22830							RHE_RS12775			RHE_RS02645				RHE_RS12775	RHE_RS12775
RHE_RS19275				RHE_RS22830				RHE_RS03175			RHE_RS22770	RHE_RS22770							RHE_RS12915			RHE_RS02680				RHE_RS12915	RHE_RS12915
RHE_RS25545				RHE_RS22770				RHE_RS03180			RHE_RS22605	RHE_RS22605							RHE_RS12920			RHE_RS02710				RHE_RS12920	RHE_RS12920
RHE_RS20765				RHE_RS22605				RHE_RS03195			RHE_RS22190	RHE_RS22190			cluster_32				RHE_RS12940			RHE_RS02715				RHE_RS12940	RHE_RS12940
RHE_RS27070				RHE_RS22190				RHE_RS03205			RHE_RS22090	RHE_RS22090			RHE_RS00415	RHE_RS00415			RHE_RS12990			RHE_RS02715				RHE_RS12990	RHE_RS12990
RHE_RS18085	RHE_RS18085			RHE_RS22090				RHE_RS03210			RHE_RS22030	RHE_RS22030			RHE_RS16205	RHE_RS16205			RHE_RS13060			RHE_RS02720				RHE_RS13060	RHE_RS13060
RHE_RS00410				RHE_RS22030				RHE_RS03275			RHE_RS22020	RHE_RS22020			RHE_RS05495	RHE_RS05495			RHE_RS13180			RHE_RS02765				RHE_RS13180	RHE_RS13180
RHE_RS10515				RHE_RS22020				RHE_RS03290			RHE_RS21915	RHE_RS21915			RHE_RS24320				RHE_RS13190			RHE_RS02790				RHE_RS13190	RHE_RS13190
RHE_RS14100	RHE_RS14100			RHE_RS21915				RHE_RS03315			RHE_RS21900	RHE_RS21900			RHE_RS12415	RHE_RS12415			RHE_RS13215			RHE_RS02790				RHE_RS13215	RHE_RS13215
RHE_RS18090				RHE_RS21900				RHE_RS03380			RHE_RS21355	RHE_RS21355							RHE_RS13235			RHE_RS02800				RHE_RS13235	RHE_RS13235
RHE_RS10510	RHE_RS10510			RHE_RS21355				RHE_RS03390			RHE_RS21205	RHE_RS21205							RHE_RS13295			RHE_RS02800				RHE_RS13295	RHE_RS13295
RHE_RS11635				RHE_RS21205				RHE_RS03405			RHE_RS20825	RHE_RS20825							RHE_RS13370			RHE_RS02825				RHE_RS13370	RHE_RS13370
RHE_RS14770	RHE_RS14770			RHE_RS20825				RHE_RS03430			RHE_RS20710	RHE_RS20710			cluster_33				RHE_RS13695			RHE_RS02825				RHE_RS13695	RHE_RS13695
RHE_RS28010	RHE_RS28010			RHE_RS20710				RHE_RS03450			RHE_RS20625	RHE_RS20625			RHE_RS09265				RHE_RS13750			RHE_RS02825				RHE_RS13750	RHE_RS13750
RHE_RS24075				RHE_RS20625				RHE_RS03485			RHE_RS20595	RHE_RS20595			RHE_RS06690				RHE_RS13770			RHE_RS02830				RHE_RS13770	RHE_RS13770
RHE_RS31225				RHE_RS20595				RHE_RS03490			RHE_RS20580	RHE_RS20580			RHE_RS02555				RHE_RS13800			RHE_RS02835				RHE_RS13800	RHE_RS13800
				RHE_RS20580				RHE_RS03500			RHE_RS20575	RHE_RS20575			RHE_RS02425				RHE_RS14100			RHE_RS02835				RHE_RS14100	RHE_RS14100
				RHE_RS20575				RHE_RS03505			RHE_RS20490	RHE_RS20490			RHE_RS04550				RHE_RS14115			RHE_RS02855				RHE_RS14115	RHE_RS14115
				RHE_RS20490				RHE_RS03515			RHE_RS20460	RHE_RS20460			RHE_RS06055				RHE_RS14135			RHE_RS02855				RHE_RS14135	RHE_RS14135
cluster_41				RHE_RS20460				RHE_RS03520			RHE_RS20285	RHE_RS20285			RHE_RS11340	RHE_RS11340			RHE_RS14150			RHE_RS02890				RHE_RS14150	RHE_RS14150
RHE_RS18180				RHE_RS20285				RHE_RS03545			RHE_RS20110	RHE_RS20110			RHE_RS04555				RHE_RS14160			RHE_RS02975				RHE_RS14160	RHE_RS14160
RHE_RS25540	RHE_RS25540			RHE_RS20110				RHE_RS03580			RHE_RS20060	RHE_RS20060							RHE_RS14175			RHE_RS03000				RHE_RS14175	RHE_RS14175
RHE_RS28070				RHE_RS20060				RHE_RS03610			RHE_RS19750	RHE_RS19750							RHE_RS14185			RHE_RS03000				RHE_RS14185	RHE_RS14185
RHE_RS18715				RHE_RS19750				RHE_RS03615			RHE_RS19745	RHE_RS19745							RHE_RS14210			RHE_RS03040				RHE_RS14210	RHE_RS14210
RHE_RS24980	RHE_RS24980			RHE_RS19745				RHE_RS03620			RHE_RS19695	RHE_RS19695			cluster_38				RHE_RS14355			RHE_RS03040				RHE_RS14355	RHE_RS14355
RHE_RS18380				RHE_RS19695				RHE_RS03635			RHE_RS19670	RHE_RS19670			RHE_RS09130	RHE_RS09130			RHE_RS14605			RHE_RS03045				RHE_RS14605	RHE_RS14605
RHE_RS06875	RHE_RS06875			RHE_RS19670				RHE_RS03640			RHE_RS19545	RHE_RS19545			RHE_RS15755	RHE_RS15755			RHE_RS14770			RHE_RS03045				RHE_RS14770	RHE_RS14770
RHE_RS03515	RHE_RS03515			RHE_RS19545				RHE_RS03680			RHE_RS19425	RHE_RS19425			RHE_RS23555	RHE_RS23555			RHE_RS14875			RHE_RS03110				RHE_RS14875	RHE_RS14875
RHE_RS20395				RHE_RS19425				RHE_RS03695			RHE_RS19300	RHE_RS19300			RHE_RS23565				RHE_RS14905			RHE_RS03110				RHE_RS14905	RHE_RS14905
RHE_RS00365				RHE_RS19300				RHE_RS03720			RHE_RS19030	RHE_RS19030							RHE_RS14920			RHE_RS03145				RHE_RS14920	RHE_RS14920
RHE_RS16235				RHE_RS19030				RHE_RS03775			RHE_RS19020	RHE_RS19020							RHE_RS15040			RHE_RS03150				RHE_RS15040	RHE_RS15040
RHE_RS20390				RHE_RS19020				RHE_RS03790			RHE_RS18970	RHE_RS18970							RHE_RS15070			RHE_RS03150				RHE_RS15070	RHE_RS15070
RHE_RS23450				RHE_RS18970				RHE_RS03870			RHE_RS18900	RHE_RS18900			cluster_39				RHE_RS15090			RHE_RS03170				RHE_RS15090	RHE_RS15090
RHE_RS16325				RHE_RS18900				RHE_RS03890			RHE_RS18865	RHE_RS18865			RHE_RS21555				RHE_RS15210			RHE_RS03170				RHE_RS15210	RHE_RS15210
RHE_RS12540				RHE_RS18865				RHE_RS03970			RHE_RS18835	RHE_RS18835			RHE_RS01655				RHE_RS15225			RHE_RS03170				RHE_RS15225	RHE_RS15225
RHE_RS02355	RHE_RS02355			RHE_RS18835				RHE_RS03980			RHE_RS18795	RHE_RS18795			RHE_RS01660	RHE_RS01660			RHE_RS15405			RHE_RS03175				RHE_RS15405	RHE_RS15405
RHE_RS23550				RHE_RS18795				RHE_RS03995			RHE_RS18760	RHE_RS18760							RHE_RS15555			RHE_RS03175				RHE_RS15555	RHE_RS15555
RHE_RS23570				RHE_RS18760				RHE_RS04010			RHE_RS18710	RHE_RS18710							RHE_RS15675			RHE_RS03175				RHE_RS15675	RHE_RS15675
RHE_RS23365				RHE_RS18710				RHE_RS04015			RHE_RS18685	RHE_RS18685							RHE_RS15755			RHE_RS03175				RHE_RS15755	RHE_RS15755
RHE_RS15515				RHE_RS18685				RHE_RS04020			RHE_RS18680	RHE_RS18680			cluster_41				RHE_RS15890			RHE_RS03180				RHE_RS15890	RHE_RS15890
RHE_RS06250				RHE_RS18680				RHE_RS04025			RHE_RS18665	RHE_RS18665			RHE_RS02765	RHE_RS02765			RHE_RS15925			RHE_RS03210				RHE_RS15925	RHE_RS15925
RHE_RS25545				RHE_RS18665				RHE_RS04030			RHE_RS18650	RHE_RS18650			RHE_RS14190				RHE_RS15995			RHE_RS03275				RHE_RS15995	RHE_RS15995
RHE_RS18940				RHE_RS18650				RHE_RS04060			RHE_RS18560	RHE_RS18560			RHE_RS14210	RHE_RS14210			RHE_RS16100			RHE_RS03275				RHE_RS16100	RHE_RS16100
RHE_RS04485				RHE_RS18560				RHE_RS04065			RHE_RS18525	RHE_RS18525			RHE_RS14185	RHE_RS14185			RHE_RS16120			RHE_RS03275				RHE_RS16120	RHE_RS16120
RHE_RS10890	RHE_RS10890			RHE_RS18525				RHE_RS04070			RHE_RS18520	RHE_RS18520							RHE_RS16135			RHE_RS03330				RHE_RS16135	RHE_RS16135
RHE_RS24110	RHE_RS24110			RHE_RS18520				RHE_RS04080			RHE_RS18340	RHE_RS18340							RHE_RS16205			RHE_RS03430				RHE_RS16205	RHE_RS16205
RHE_RS17595	RHE_RS17595			RHE_RS18340				RHE_RS04090			RHE_RS18270	RHE_RS18270							RHE_RS16230			RHE_RS03430				RHE_RS16230	RHE_RS16230
RHE_RS27645	RHE_RS27645			RHE_RS18270				RHE_RS04100			RHE_RS18235	RHE_RS18235			cluster_42				RHE_RS16340			RHE_RS03430				RHE_RS16340	RHE_RS16340
RHE_RS08160				RHE_RS18235				RHE_RS04120			RHE_RS18135	RHE_RS18135			RHE_RS27750	RHE_RS27750			RHE_RS16415			RHE_RS03465				RHE_RS16415	RHE_RS16415
RHE_RS18145				RHE_RS18135				RHE_RS04150			RHE_RS18085	RHE_RS18085			RHE_RS06210				RHE_RS16670			RHE_RS03515				RHE_RS16670	RHE_RS16670
RHE_RS06880				RHE_RS18085				RHE_RS04190			RHE_RS18035	RHE_RS18035							RHE_RS16760			RHE_RS03515				RHE_RS16760	RHE_RS16760
RHE_RS10550				RHE_RS18035				RHE_RS04235			RHE_RS17840	RHE_RS17840							RHE_RS16800			RHE_RS03515				RHE_RS16800	RHE_RS16800
RHE_RS27555				RHE_RS17840				RHE_RS04310			RHE_RS17835	RHE_RS17835							RHE_RS16815			RHE_RS03515				RHE_RS16815	RHE_RS16815
RHE_RS02485				RHE_RS17835				RHE_RS04315			RHE_RS17755	RHE_RS17755			cluster_43				RHE_RS16825			RHE_RS03575				RHE_RS16825	RHE_RS16825
RHE_RS18930				RHE_RS17755				RHE_RS04330			RHE_RS17595	RHE_RS17595			RHE_RS03170				RHE_RS17050			RHE_RS03595				RHE_RS17050	RHE_RS17050
RHE_RS25455	RHE_RS25455			RHE_RS17595				RHE_RS04350			RHE_RS17450	RHE_RS17450			RHE_RS07425				RHE_RS17090			RHE_RS03610				RHE_RS17090	RHE_RS17090
RHE_RS06860				RHE_RS17450				RHE_RS04370			RHE_RS17305	RHE_RS17305			RHE_RS03175	RHE_RS03175			RHE_RS17135			RHE_RS03610				RHE_RS17135	RHE_RS17135
RHE_RS10515				RHE_RS17305				RHE_RS04375			RHE_RS17200	RHE_RS17200							RHE_RS17145			RHE_RS03610				RHE_RS17145	RHE_RS17145
RHE_RS23190				RHE_RS17200				RHE_RS04380			RHE_RS17170	RHE_RS17170							RHE_RS17170			RHE_RS03645				RHE_RS17170	RHE_RS17170
RHE_RS03640				RHE_RS17170				RHE_RS04420			RHE_RS17145	RHE_RS17145							RHE_RS17200			RHE_RS03645				RHE_RS17200	RHE_RS17200
RHE_RS16230	RHE_RS16230			RHE_RS17145				RHE_RS04435			RHE_RS17135	RHE_RS17135			cluster_44				RHE_RS17430			RHE_RS03645				RHE_RS17430	RHE_RS17430
RHE_RS28425				RHE_RS17135				RHE_RS04455			RHE_RS17090	RHE_RS17090			RHE_RS16970				RHE_RS17450			RHE_RS03720				RHE_RS17450	RHE_RS17450
RHE_RS02365				RHE_RS17090				RHE_RS04460			RHE_RS17055	RHE_RS17055			RHE_RS00415	RHE_RS00415			RHE_RS17595			RHE_RS03720				RHE_RS17595	RHE_RS17595
RHE_RS00460				RHE_RS17055				RHE_RS04465			RHE_RS17050	RHE_RS17050			RHE_RS01975				RHE_RS17835			RHE_RS03720				RHE_RS17835	RHE_RS17835
RHE_RS26285				RHE_RS17050				RHE_RS04485			RHE_RS16825	RHE_RS16825			RHE_RS26695	RHE_RS26695			RHE_RS17840			RHE_RS03720				RHE_RS17840	RHE_RS17840
RHE_RS23180	RHE_RS23180			RHE_RS16825				RHE_RS04500			RHE_RS16815	RHE_RS16815			RHE_RS29075	RHE_RS29075			RHE_RS18035			RHE_RS03750				RHE_RS18035	RHE_RS18035
RHE_RS03520				RHE_RS16815				RHE_RS04510			RHE_RS16800	RHE_RS16800			RHE_RS21355	RHE_RS21355			RHE_RS18085			RHE_RS03770				RHE_RS18085	RHE_RS18085
RHE_RS07760				RHE_RS16800				RHE_RS04525			RHE_RS16760	RHE_RS16760			RHE_RS04490				RHE_RS18135			RHE_RS03775				RHE_RS18135	RHE_RS18135
RHE_RS26280	RHE_RS26280			RHE_RS16760				RHE_RS04535			RHE_RS16670	RHE_RS16670			RHE_RS10885				RHE_RS18235			RHE_RS03775				RHE_RS18235	RHE_RS18235
RHE_RS21035				RHE_RS16670				RHE_RS04570			RHE_RS16415	RHE_RS16415			RHE_RS10890	RHE_RS10890			RHE_RS18340			RHE_RS03775				RHE_RS18340	RHE_RS18340
RHE_RS19725				RHE_RS16415				RHE_RS04575			RHE_RS16340	RHE_RS16340			RHE_RS17105				RHE_RS18525			RHE_RS03915				RHE_RS18525	RHE_RS18525
RHE_RS14710				RHE_RS16340				RHE_RS04590			RHE_RS16230	RHE_RS16230			RHE_RS10750				RHE_RS18560			RHE_RS03915				RHE_RS18560	RHE_RS18560
RHE_RS19035				RHE_RS16230				RHE_RS04595			RHE_RS16205	RHE_RS16205			RHE_RS23080	RHE_RS23080			RHE_RS18650			RHE_RS03950				RHE_RS18650	RHE_RS18650
RHE_RS12060	RHE_RS12060			RHE_RS16205				RHE_RS04645			RHE_RS16135	RHE_RS16135			RHE_RS00815				RHE_RS18665			RHE_RS03990				RHE_RS18665	RHE_RS18665
RHE_RS08675				RHE_RS16135				RHE_RS04720			RHE_RS16120	RHE_RS16120							RHE_RS18680			RHE_RS04010				RHE_RS18680	RHE_RS18680
RHE_RS28370	RHE_RS28370			RHE_RS16120				RHE_RS04735			RHE_RS16100	RHE_RS16100							RHE_RS18685			RHE_RS04025				RHE_RS18685	RHE_RS18685
RHE_RS28025				RHE_RS16100				RHE_RS04835			RHE_RS15995	RHE_RS15995							RHE_RS18710			RHE_RS04030				RHE_RS18710	RHE_RS18710
RHE_RS26920				RHE_RS15995				RHE_RS04855			RHE_RS15925	RHE_RS15925			cluster_47				RHE_RS18760			RHE_RS04030				RHE_RS18760	RHE_RS18760
RHE_RS29380				RHE_RS15925				RHE_RS04885			RHE_RS15890	RHE_RS15890			RHE_RS27360				RHE_RS18795			RHE_RS04040				RHE_RS18795	RHE_RS18795
RHE_RS22735				RHE_RS15890				RHE_RS04950			RHE_RS15800	RHE_RS15800			RHE_RS18665	RHE_RS18665			RHE_RS18835			RHE_RS04105				RHE_RS18835	RHE_RS18835
RHE_RS19030	RHE_RS19030			RHE_RS15800				RHE_RS04955			RHE_RS15755	RHE_RS15755							RHE_RS18865			RHE_RS04115				RHE_RS18865	RHE_RS18865
RHE_RS18325				RHE_RS15755				RHE_RS05000			RHE_RS15675	RHE_RS15675							RHE_RS18900			RHE_RS04115				RHE_RS18900	RHE_RS18900
RHE_RS27650				RHE_RS15675				RHE_RS05065			RHE_RS15555	RHE_RS15555							RHE_RS18970			RHE_RS04155				RHE_RS18970	RHE_RS18970
RHE_RS05615				RHE_RS15555				RHE_RS05105			RHE_RS15405	RHE_RS15405			cluster_49				RHE_RS19020			RHE_RS04155				RHE_RS19020	RHE_RS19020
				RHE_RS15405				RHE_RS05170			RHE_RS15225	RHE_RS15225			RHE_RS17830				RHE_RS19030			RHE_RS04225				RHE_RS19030	RHE_RS19030
				RHE_RS15225				RHE_RS05175			RHE_RS15210	RHE_RS15210			RHE_RS28020	RHE_RS28020			RHE_RS19300			RHE_RS04265				RHE_RS19300	RHE_RS19300
				RHE_RS15210				RHE_RS05185			RHE_RS15090	RHE_RS15090							RHE_RS19425			RHE_RS04310				RHE_RS19425	RHE_RS19425
cluster_44				RHE_RS15090				RHE_RS05190			RHE_RS15070	RHE_RS15070							RHE_RS19545			RHE_RS04310				RHE_RS19545	RHE_RS19545
RHE_RS28225				RHE_RS15070				RHE_RS05195			RHE_RS15040	RHE_RS15040							RHE_RS19670			RHE_RS04315				RHE_RS19670	RHE_RS19670
RHE_RS28220	RHE_RS28220			RHE_RS15040				RHE_RS05215			RHE_RS14920	RHE_RS14920			cluster_50				RHE_RS19695			RHE_RS04315				RHE_RS19695	RHE_RS19695
RHE_RS10725				RHE_RS14920				RHE_RS05220			RHE_RS14905	RHE_RS14905			RHE_RS14140				RHE_RS19745			RHE_RS04315				RHE_RS19745	RHE_RS19745
				RHE_RS14905				RHE_RS05255			RHE_RS14875	RHE_RS14875			RHE_RS14135	RHE_RS14135			RHE_RS19750			RHE_RS04340				RHE_RS19750	RHE_RS19750
				RHE_RS14875				RHE_RS05260			RHE_RS14770	RHE_RS14770							RHE_RS20060			RHE_RS04340				RHE_RS20060	RHE_RS20060
				RHE_RS14770				RHE_RS05265			RHE_RS14355	RHE_RS14355							RHE_RS20110			RHE_RS04490				RHE_RS20110	RHE_RS20110
cluster_48				RHE_RS14355				RHE_RS05315			RHE_RS14210	RHE_RS14210							RHE_RS20285			RHE_RS04495				RHE_RS20285	RHE_RS20285
RHE_RS16675				RHE_RS14210				RHE_RS05330			RHE_RS14185	RHE_RS14185			cluster_51				RHE_RS20460			RHE_RS04545				RHE_RS20460	RHE_RS20460
RHE_RS16670	RHE_RS16670			RHE_RS14185				RHE_RS05335			RHE_RS14175	RHE_RS14175			RHE_RS10375				RHE_RS20490			RHE_RS04545				RHE_RS20490	RHE_RS20490
				RHE_RS14175				RHE_RS05380			RHE_RS14160	RHE_RS14160			RHE_RS23835	RHE_RS23835			RHE_RS20575			RHE_RS04545				RHE_RS20575	RHE_RS20575
				RHE_RS14160				RHE_RS05450			RHE_RS14150	RHE_RS14150			RHE_RS23840				RHE_RS20580			RHE_RS04550				RHE_RS20580	RHE_RS20580
				RHE_RS14150				RHE_RS05495			RHE_RS14135	RHE_RS14135							RHE_RS20595			RHE_RS04550				RHE_RS20595	RHE_RS20595
cluster_49				RHE_RS14135				RHE_RS05510			RHE_RS14115	RHE_RS14115							RHE_RS20625			RHE_RS04550				RHE_RS20625	RHE_RS20625
RHE_RS27750	RHE_RS27750			RHE_RS14115				RHE_RS05515			RHE_RS14100	RHE_RS14100							RHE_RS20710			RHE_RS04555				RHE_RS20710	RHE_RS20710
RHE_RS27745				RHE_RS14100				RHE_RS05570			RHE_RS14055	RHE_RS14055			cluster_53				RHE_RS20825			RHE_RS04555				RHE_RS20825	RHE_RS20825
				RHE_RS14055				RHE_RS05615			RHE_RS13965	RHE_RS13965			RHE_RS03170				RHE_RS21205			RHE_RS04575				RHE_RS21205	RHE_RS21205
				RHE_RS13965				RHE_RS05655			RHE_RS13800	RHE_RS13800			RHE_RS03175	RHE_RS03175			RHE_RS21355			RHE_RS04625				RHE_RS21355	RHE_RS21355
				RHE_RS13800				RHE_RS05725			RHE_RS13770	RHE_RS13770							RHE_RS21915			RHE_RS04645				RHE_RS21915	RHE_RS21915
cluster_51				RHE_RS13770				RHE_RS05730			RHE_RS13750	RHE_RS13750							RHE_RS22020			RHE_RS04645				RHE_RS22020	RHE_RS22020
RHE_RS14685				RHE_RS13750				RHE_RS05735			RHE_RS13695	RHE_RS13695							RHE_RS22030			RHE_RS04645				RHE_RS22030	RHE_RS22030
RHE_RS14830				RHE_RS13695				RHE_RS05780			RHE_RS13450	RHE_RS13450			cluster_54				RHE_RS22090			RHE_RS04645				RHE_RS22090	RHE_RS22090
RHE_RS07210	RHE_RS07210			RHE_RS13450				RHE_RS05790			RHE_RS13295	RHE_RS13295			RHE_RS02490				RHE_RS22190			RHE_RS04650				RHE_RS22190	RHE_RS22190
				RHE_RS13295				RHE_RS05815			RHE_RS13235	RHE_RS13235			RHE_RS01655				RHE_RS22460			RHE_RS04650				RHE_RS22460	RHE_RS22460
				RHE_RS13235				RHE_RS05820			RHE_RS13215	RHE_RS13215			RHE_RS01660	RHE_RS01660			RHE_RS22605			RHE_RS04655				RHE_RS22605	RHE_RS22605
				RHE_RS13215				RHE_RS05855			RHE_RS13190	RHE_RS13190							RHE_RS22770			RHE_RS04655				RHE_RS22770	RHE_RS22770
cluster_53				RHE_RS13190				RHE_RS05865			RHE_RS13180	RHE_RS13180							RHE_RS22830			RHE_RS04700				RHE_RS22830	RHE_RS22830
RHE_RS09700				RHE_RS13180				RHE_RS05915			RHE_RS13070	RHE_RS13070							RHE_RS22955			RHE_RS04700				RHE_RS22955	RHE_RS22955
RHE_RS01265	RHE_RS01265			RHE_RS13070				RHE_RS05935			RHE_RS13060	RHE_RS13060			cluster_55				RHE_RS23020			RHE_RS04705				RHE_RS23020	RHE_RS23020
RHE_RS03520				RHE_RS13060				RHE_RS05945			RHE_RS12990	RHE_RS12990			RHE_RS18140				RHE_RS23055			RHE_RS04705				RHE_RS23055	RHE_RS23055
RHE_RS06135	RHE_RS06135			RHE_RS12990				RHE_RS05950			RHE_RS12940	RHE_RS12940			RHE_RS18135	RHE_RS18135			RHE_RS23065			RHE_RS04970				RHE_RS23065	RHE_RS23065
RHE_RS08550				RHE_RS12940				RHE_RS06000			RHE_RS12920	RHE_RS12920							RHE_RS23080			RHE_RS04985				RHE_RS23080	RHE_RS23080
RHE_RS00105				RHE_RS12920				RHE_RS06005			RHE_RS12915	RHE_RS12915							RHE_RS23110			RHE_RS04985				RHE_RS23110	RHE_RS23110
RHE_RS09730				RHE_RS12915				RHE_RS06010			RHE_RS12775	RHE_RS12775							RHE_RS23130			RHE_RS04995				RHE_RS23130	RHE_RS23130
RHE_RS19505				RHE_RS12775				RHE_RS06015			RHE_RS12670	RHE_RS12670			cluster_56				RHE_RS23180			RHE_RS05000				RHE_RS23180	RHE_RS23180
RHE_RS15500				RHE_RS12670				RHE_RS06050			RHE_RS12620	RHE_RS12620			RHE_RS08025	RHE_RS08025			RHE_RS23325			RHE_RS05000				RHE_RS23325	RHE_RS23325
RHE_RS25290	RHE_RS25290			RHE_RS12620				RHE_RS06070			RHE_RS12585	RHE_RS12585			RHE_RS14190				RHE_RS23350			RHE_RS05000				RHE_RS23350	RHE_RS23350
RHE_RS07275				RHE_RS12585				RHE_RS06105			RHE_RS12520	RHE_RS12520			RHE_RS14185	RHE_RS14185			RHE_RS23470			RHE_RS05020				RHE_RS23470	RHE_RS23470
RHE_RS03515	RHE_RS03515			RHE_RS12520				RHE_RS06135			RHE_RS12460	RHE_RS12460							RHE_RS23520			RHE_RS05085				RHE_RS23520	RHE_RS23520
RHE_RS16220				RHE_RS12460				RHE_RS06175			RHE_RS12415	RHE_RS12415							RHE_RS23540			RHE_RS05110				RHE_RS23540	RHE_RS23540
RHE_RS26265				RHE_RS12415				RHE_RS06195			RHE_RS12325	RHE_RS12325							RHE_RS23555			RHE_RS05120				RHE_RS23555	RHE_RS23555
RHE_RS19510				RHE_RS12325				RHE_RS06200			RHE_RS12205	RHE_RS12205			cluster_58				RHE_RS23635			RHE_RS05120				RHE_RS23635	RHE_RS23635
RHE_RS18125				RHE_RS12205				RHE_RS06215			RHE_RS12060	RHE_RS12060			RHE_RS14140				RHE_RS23665			RHE_RS05140				RHE_RS23665	RHE_RS23665
RHE_RS08055				RHE_RS12060				RHE_RS06235			RHE_RS12035	RHE_RS12035			RHE_RS14135	RHE_RS14135			RHE_RS23775			RHE_RS05170				RHE_RS23775	RHE_RS23775
RHE_RS09695				RHE_RS12035				RHE_RS06240			RHE_RS11860	RHE_RS11860							RHE_RS23835			RHE_RS05255				RHE_RS23835	RHE_RS23835
RHE_RS04460				RHE_RS11860				RHE_RS06250			RHE_RS11740	RHE_RS11740							RHE_RS23885			RHE_RS05255				RHE_RS23885	RHE_RS23885
RHE_RS11525				RHE_RS11740				RHE_RS06305			RHE_RS11690	RHE_RS11690							RHE_RS23915			RHE_RS05265				RHE_RS23915	RHE_RS23915
				RHE_RS11690				RHE_RS06325			RHE_RS11340	RHE_RS11340			cluster_59				RHE_RS23945			RHE_RS05265				RHE_RS23945	RHE_RS23945
				RHE_RS11340				RHE_RS06345			RHE_RS11075	RHE_RS11075			RHE_RS04705	RHE_RS04705			RHE_RS24090			RHE_RS05265				RHE_RS24090	RHE_RS24090
				RHE_RS11075				RHE_RS06405			RHE_RS10960	RHE_RS10960			RHE_RS04700				RHE_RS24095			RHE_RS05300				RHE_RS24095	RHE_RS24095
cluster_54				RHE_RS10960				RHE_RS06410			RHE_RS10920	RHE_RS10920							RHE_RS24110			RHE_RS05315				RHE_RS24110	RHE_RS24110
RHE_RS28005				RHE_RS10920				RHE_RS06435			RHE_RS10890	RHE_RS10890							RHE_RS24475			RHE_RS05315				RHE_RS24475	RHE_RS24475
RHE_RS28010	RHE_RS28010			RHE_RS10890				RHE_RS06465			RHE_RS10640	RHE_RS10640							RHE_RS24540			RHE_RS05315				RHE_RS24540	RHE_RS24540
				RHE_RS10640				RHE_RS06535			RHE_RS10580	RHE_RS10580			cluster_60				RHE_RS24620			RHE_RS05315				RHE_RS24620	RHE_RS24620
				RHE_RS10580				RHE_RS06555			RHE_RS10545	RHE_RS10545			RHE_RS00855	RHE_RS00855			RHE_RS24735			RHE_RS05330				RHE_RS24735	RHE_RS24735
				RHE_RS10545				RHE_RS06560			RHE_RS10510	RHE_RS10510			RHE_RS01975				RHE_RS24755			RHE_RS05330				RHE_RS24755	RHE_RS24755
cluster_55				RHE_RS10510				RHE_RS06565			RHE_RS10485	RHE_RS10485			RHE_RS04265				RHE_RS24760			RHE_RS05340				RHE_RS24760	RHE_RS24760
RHE_RS12540				RHE_RS10485				RHE_RS06580			RHE_RS10445	RHE_RS10445			RHE_RS00850				RHE_RS24850			RHE_RS05340				RHE_RS24850	RHE_RS24850
RHE_RS07140				RHE_RS10445				RHE_RS06590			RHE_RS10425	RHE_RS10425			RHE_RS13955				RHE_RS24980			RHE_RS05380				RHE_RS24980	RHE_RS24980
RHE_RS18665	RHE_RS18665			RHE_RS10425				RHE_RS06595			RHE_RS10220	RHE_RS10220			RHE_RS20950				RHE_RS25040			RHE_RS05380				RHE_RS25040	RHE_RS25040
				RHE_RS10220				RHE_RS06620			RHE_RS09445	RHE_RS09445			RHE_RS00815				RHE_RS25060			RHE_RS05380				RHE_RS25060	RHE_RS25060
				RHE_RS09445				RHE_RS06640			RHE_RS09130	RHE_RS09130			RHE_RS18525	RHE_RS18525			RHE_RS25170			RHE_RS05380				RHE_RS25170	RHE_RS25170
				RHE_RS09130				RHE_RS06655			RHE_RS09080	RHE_RS09080							RHE_RS25185			RHE_RS05385				RHE_RS25185	RHE_RS25185
cluster_57				RHE_RS09080				RHE_RS06660			RHE_RS09045	RHE_RS09045							RHE_RS25290			RHE_RS05385				RHE_RS25290	RHE_RS25290
RHE_RS12525				RHE_RS09045				RHE_RS06685			RHE_RS09025	RHE_RS09025							RHE_RS25455			RHE_RS05415				RHE_RS25455	RHE_RS25455
RHE_RS18715				RHE_RS09025				RHE_RS06700			RHE_RS09015	RHE_RS09015			cluster_67				RHE_RS25540			RHE_RS05415				RHE_RS25540	RHE_RS25540
RHE_RS25040	RHE_RS25040			RHE_RS09015				RHE_RS06705			RHE_RS08925	RHE_RS08925			RHE_RS23540	RHE_RS23540			RHE_RS25580			RHE_RS05415				RHE_RS25580	RHE_RS25580
				RHE_RS08925				RHE_RS06725			RHE_RS08920	RHE_RS08920			RHE_RS26640				RHE_RS25595			RHE_RS05420				RHE_RS25595	RHE_RS25595
				RHE_RS08920				RHE_RS06825			RHE_RS08785	RHE_RS08785							RHE_RS25605			RHE_RS05425				RHE_RS25605	RHE_RS25605
				RHE_RS08785				RHE_RS06845			RHE_RS08760	RHE_RS08760							RHE_RS25725			RHE_RS05445				RHE_RS25725	RHE_RS25725
cluster_58				RHE_RS08760				RHE_RS06860			RHE_RS08350	RHE_RS08350							RHE_RS25835			RHE_RS05465				RHE_RS25835	RHE_RS25835
RHE_RS28975				RHE_RS08350				RHE_RS06875			RHE_RS08025	RHE_RS08025			cluster_68				RHE_RS25905			RHE_RS05495				RHE_RS25905	RHE_RS25905
RHE_RS23380				RHE_RS08025				RHE_RS06880			RHE_RS07925	RHE_RS07925			RHE_RS27460	RHE_RS27460			RHE_RS25970			RHE_RS05495				RHE_RS25970	RHE_RS25970
RHE_RS23385				RHE_RS07925				RHE_RS06895			RHE_RS07835	RHE_RS07835			RHE_RS19485				RHE_RS26000			RHE_RS05555				RHE_RS26000	RHE_RS26000
RHE_RS12670	RHE_RS12670			RHE_RS07835				RHE_RS06955			RHE_RS07830	RHE_RS07830			RHE_RS27465				RHE_RS26015			RHE_RS05560				RHE_RS26015	RHE_RS26015
RHE_RS29495				RHE_RS07830				RHE_RS06960			RHE_RS07685	RHE_RS07685							RHE_RS26040			RHE_RS05560				RHE_RS26040	RHE_RS26040
RHE_RS29140				RHE_RS07685				RHE_RS07005			RHE_RS07480	RHE_RS07480							RHE_RS26070			RHE_RS05560				RHE_RS26070	RHE_RS26070
RHE_RS30900				RHE_RS07480				RHE_RS07015			RHE_RS07315	RHE_RS07315							RHE_RS26115			RHE_RS05640				RHE_RS26115	RHE_RS26115
RHE_RS29085				RHE_RS07315				RHE_RS07050			RHE_RS07210	RHE_RS07210			cluster_74				RHE_RS26235			RHE_RS05730				RHE_RS26235	RHE_RS26235
RHE_RS29170				RHE_RS07210				RHE_RS07065			RHE_RS07105	RHE_RS07105			RHE_RS05265	RHE_RS05265			RHE_RS26280			RHE_RS05730				RHE_RS26280	RHE_RS26280
RHE_RS30890				RHE_RS07105				RHE_RS07070			RHE_RS06955	RHE_RS06955			RHE_RS24425				RHE_RS26355			RHE_RS05730				RHE_RS26355	RHE_RS26355
RHE_RS29045				RHE_RS06955				RHE_RS07075			RHE_RS06875	RHE_RS06875			RHE_RS13845				RHE_RS26495			RHE_RS05735				RHE_RS26495	RHE_RS26495
RHE_RS23415				RHE_RS06875				RHE_RS07105			RHE_RS06845	RHE_RS06845			RHE_RS13755				RHE_RS26635			RHE_RS05750				RHE_RS26635	RHE_RS26635
				RHE_RS06845				RHE_RS07140			RHE_RS06825	RHE_RS06825			RHE_RS25805				RHE_RS26680			RHE_RS05790				RHE_RS26680	RHE_RS26680
				RHE_RS06825				RHE_RS07205			RHE_RS06705	RHE_RS06705			RHE_RS16880				RHE_RS26695			RHE_RS05815				RHE_RS26695	RHE_RS26695
				RHE_RS06705				RHE_RS07210			RHE_RS06620	RHE_RS06620							RHE_RS26720			RHE_RS05815				RHE_RS26720	RHE_RS26720
cluster_59				RHE_RS06620				RHE_RS07240			RHE_RS06580	RHE_RS06580							RHE_RS26765			RHE_RS05850				RHE_RS26765	RHE_RS26765
RHE_RS26015	RHE_RS26015			RHE_RS06580				RHE_RS07245			RHE_RS06555	RHE_RS06555							RHE_RS26790			RHE_RS05855				RHE_RS26790	RHE_RS26790
RHE_RS15405	RHE_RS15405			RHE_RS06555				RHE_RS07275			RHE_RS06535	RHE_RS06535			cluster_75				RHE_RS26795			RHE_RS05855				RHE_RS26795	RHE_RS26795
RHE_RS28550				RHE_RS06535				RHE_RS07285			RHE_RS06465	RHE_RS06465			RHE_RS12670	RHE_RS12670			RHE_RS26800			RHE_RS05915				RHE_RS26800	RHE_RS26800
RHE_RS28555	RHE_RS28555			RHE_RS06465				RHE_RS07290			RHE_RS06405	RHE_RS06405			RHE_RS08975				RHE_RS26840			RHE_RS05940				RHE_RS26840	RHE_RS26840
RHE_RS13975				RHE_RS06405				RHE_RS07295			RHE_RS06215	RHE_RS06215			RHE_RS29165				RHE_RS26875			RHE_RS05940				RHE_RS26875	RHE_RS26875
				RHE_RS06215				RHE_RS07300			RHE_RS06175	RHE_RS06175			RHE_RS06320				RHE_RS27050			RHE_RS05945				RHE_RS27050	RHE_RS27050
				RHE_RS06175				RHE_RS07305			RHE_RS06135	RHE_RS06135							RHE_RS27185			RHE_RS05945				RHE_RS27185	RHE_RS27185
				RHE_RS06135				RHE_RS07315			RHE_RS06105	RHE_RS06105							RHE_RS27195			RHE_RS05945				RHE_RS27195	RHE_RS27195
cluster_60				RHE_RS06105				RHE_RS07320			RHE_RS06015	RHE_RS06015							RHE_RS27240			RHE_RS05965				RHE_RS27240	RHE_RS27240
RHE_RS10515				RHE_RS06015				RHE_RS07330			RHE_RS05945	RHE_RS05945			cluster_81				RHE_RS27280			RHE_RS05965				RHE_RS27280	RHE_RS27280
RHE_RS10510	RHE_RS10510			RHE_RS05945				RHE_RS07350			RHE_RS05915	RHE_RS05915			RHE_RS02790				RHE_RS27310			RHE_RS05980				RHE_RS27310	RHE_RS27310
				RHE_RS05915				RHE_RS07365			RHE_RS05855	RHE_RS05855			RHE_RS12060	RHE_RS12060			RHE_RS27415			RHE_RS05980				RHE_RS27415	RHE_RS27415
				RHE_RS05855				RHE_RS07375			RHE_RS05815	RHE_RS05815			RHE_RS12065	RHE_RS12065			RHE_RS27460			RHE_RS06015				RHE_RS27460	RHE_RS27460
				RHE_RS05815				RHE_RS07380			RHE_RS05790	RHE_RS05790							RHE_RS27470			RHE_RS06025				RHE_RS27470	RHE_RS27470
cluster_61				RHE_RS05790				RHE_RS07480			RHE_RS05735	RHE_RS05735							RHE_RS27525			RHE_RS06025				RHE_RS27525	RHE_RS27525
RHE_RS26015	RHE_RS26015			RHE_RS05735				RHE_RS07510			RHE_RS05730	RHE_RS05730							RHE_RS27570			RHE_RS06030				RHE_RS27570	RHE_RS27570
RHE_RS01870				RHE_RS05730				RHE_RS07590			RHE_RS05510	RHE_RS05510			cluster_87				RHE_RS27645			RHE_RS06030				RHE_RS27645	RHE_RS27645
RHE_RS10545	RHE_RS10545			RHE_RS05510				RHE_RS07595			RHE_RS05495	RHE_RS05495			RHE_RS24100				RHE_RS27750			RHE_RS06045				RHE_RS27750	RHE_RS27750
RHE_RS10550				RHE_RS05495				RHE_RS07645			RHE_RS05380	RHE_RS05380			RHE_RS24095	RHE_RS24095			RHE_RS27845			RHE_RS06055				RHE_RS27845	RHE_RS27845
				RHE_RS05380				RHE_RS07670			RHE_RS05330	RHE_RS05330			RHE_RS28510	RHE_RS28510			RHE_RS27920			RHE_RS06065				RHE_RS27920	RHE_RS27920
				RHE_RS05330				RHE_RS07685			RHE_RS05315	RHE_RS05315							RHE_RS27930			RHE_RS06095				RHE_RS27930	RHE_RS27930
				RHE_RS05315				RHE_RS07690			RHE_RS05265	RHE_RS05265							RHE_RS27935			RHE_RS06095				RHE_RS27935	RHE_RS27935
cluster_62				RHE_RS05265				RHE_RS07750			RHE_RS05255	RHE_RS05255							RHE_RS28010			RHE_RS06105				RHE_RS28010	RHE_RS28010
RHE_RS17055	RHE_RS17055			RHE_RS05255				RHE_RS07755			RHE_RS05215	RHE_RS05215			cluster_88				RHE_RS28020			RHE_RS06105				RHE_RS28020	RHE_RS28020
RHE_RS05945	RHE_RS05945			RHE_RS05215				RHE_RS07760			RHE_RS05170	RHE_RS05170			RHE_RS03040	RHE_RS03040			RHE_RS28160			RHE_RS06105				RHE_RS28160	RHE_RS28160
RHE_RS01160				RHE_RS05170				RHE_RS07800			RHE_RS05000	RHE_RS05000			RHE_RS29335	RHE_RS29335			RHE_RS28305			RHE_RS06115				RHE_RS28305	RHE_RS28305
RHE_RS07975				RHE_RS05000				RHE_RS07830			RHE_RS04645	RHE_RS04645			RHE_RS03045				RHE_RS28340			RHE_RS06115				RHE_RS28340	RHE_RS28340
RHE_RS04510				RHE_RS04645				RHE_RS07835			RHE_RS04575	RHE_RS04575							RHE_RS28370			RHE_RS06135				RHE_RS28370	RHE_RS28370
RHE_RS11300				RHE_RS04575				RHE_RS07925			RHE_RS04315	RHE_RS04315							RHE_RS28450			RHE_RS06135				RHE_RS28450	RHE_RS28450
RHE_RS11955				RHE_RS04315				RHE_RS07975			RHE_RS04310	RHE_RS04310							RHE_RS28510			RHE_RS06135				RHE_RS28510	RHE_RS28510
RHE_RS11950				RHE_RS04310				RHE_RS08025			RHE_RS04065	RHE_RS04065			cluster_89				RHE_RS28555			RHE_RS06160				RHE_RS28555	RHE_RS28555
RHE_RS19935				RHE_RS04065				RHE_RS08035			RHE_RS04030	RHE_RS04030			RHE_RS29835	RHE_RS29835			RHE_RS28625			RHE_RS06175				RHE_RS28625	RHE_RS28625
RHE_RS01020				RHE_RS04030				RHE_RS08055			RHE_RS04025	RHE_RS04025			RHE_RS02330				RHE_RS28695			RHE_RS06210				RHE_RS28695	RHE_RS28695
RHE_RS14740				RHE_RS04025				RHE_RS08065			RHE_RS04010	RHE_RS04010							RHE_RS28710			RHE_RS06210				RHE_RS28710	RHE_RS28710
RHE_RS09865				RHE_RS04010				RHE_RS08080			RHE_RS03775	RHE_RS03775							RHE_RS28725			RHE_RS06215				RHE_RS28725	RHE_RS28725
RHE_RS17710				RHE_RS03775				RHE_RS08085			RHE_RS03720	RHE_RS03720							RHE_RS28890			RHE_RS06215				RHE_RS28890	RHE_RS28890
RHE_RS05950				RHE_RS03720				RHE_RS08090			RHE_RS03610	RHE_RS03610			cluster_93				RHE_RS28900			RHE_RS06260				RHE_RS28900	RHE_RS28900
RHE_RS01155				RHE_RS03610				RHE_RS08130			RHE_RS03515	RHE_RS03515			RHE_RS09025	RHE_RS09025			RHE_RS29075			RHE_RS06265				RHE_RS29075	RHE_RS29075
RHE_RS26165				RHE_RS03515				RHE_RS08150			RHE_RS03430	RHE_RS03430			RHE_RS31005				RHE_RS29195			RHE_RS06280				RHE_RS29195	RHE_RS29195
RHE_RS07685	RHE_RS07685			RHE_RS03430				RHE_RS08160			RHE_RS03275	RHE_RS03275							RHE_RS29200			RHE_RS06280				RHE_RS29200	RHE_RS29200
RHE_RS02080				RHE_RS03275				RHE_RS08205			RHE_RS03210	RHE_RS03210							RHE_RS29205			RHE_RS06290				RHE_RS29205	RHE_RS29205
RHE_RS04500				RHE_RS03210				RHE_RS08215			RHE_RS03180	RHE_RS03180							RHE_RS29335			RHE_RS06290				RHE_RS29335	RHE_RS29335
RHE_RS00700				RHE_RS03180				RHE_RS08240			RHE_RS03175	RHE_RS03175			cluster_95				RHE_RS29400			RHE_RS06290				RHE_RS29400	RHE_RS29400
RHE_RS00705				RHE_RS03175				RHE_RS08260			RHE_RS03085	RHE_RS03085			RHE_RS28165				RHE_RS29535			RHE_RS06320				RHE_RS29535	RHE_RS29535
RHE_RS00745				RHE_RS03085				RHE_RS08275			RHE_RS03040	RHE_RS03040			RHE_RS15225	RHE_RS15225			RHE_RS29630			RHE_RS06380				RHE_RS29630	RHE_RS29630
RHE_RS24090	RHE_RS24090			RHE_RS03040				RHE_RS08300			RHE_RS03000	RHE_RS03000							RHE_RS29775			RHE_RS06380				RHE_RS29775	RHE_RS29775
RHE_RS07050				RHE_RS03000				RHE_RS08320			RHE_RS02855	RHE_RS02855							RHE_RS29835			RHE_RS06395				RHE_RS29835	RHE_RS29835
RHE_RS17660				RHE_RS02855				RHE_RS08350			RHE_RS02835	RHE_RS02835							RHE_RS29840			RHE_RS06405				RHE_RS29840	RHE_RS29840
RHE_RS15090	RHE_RS15090			RHE_RS02835				RHE_RS08385			RHE_RS02765	RHE_RS02765			cluster_98				RHE_RS29975			RHE_RS06495				RHE_RS29975	RHE_RS29975
RHE_RS19440				RHE_RS02765				RHE_RS08405			RHE_RS02715	RHE_RS02715			RHE_RS13735				RHE_RS30095			RHE_RS06535				RHE_RS30095	RHE_RS30095
RHE_RS17915				RHE_RS02715				RHE_RS08410			RHE_RS02710	RHE_RS02710			RHE_RS09005				RHE_RS30285			RHE_RS06555				RHE_RS30285	RHE_RS30285
RHE_RS20020				RHE_RS02710				RHE_RS08430			RHE_RS02600	RHE_RS02600			RHE_RS17645				RHE_RS30310			RHE_RS06580				RHE_RS30310	RHE_RS30310
				RHE_RS02600				RHE_RS08455			RHE_RS02355	RHE_RS02355			RHE_RS06115				RHE_RS30470			RHE_RS06620				RHE_RS30470	RHE_RS30470
				RHE_RS02355				RHE_RS08515			RHE_RS02340	RHE_RS02340			RHE_RS29820				RHE_RS30570			RHE_RS06635				RHE_RS30570	RHE_RS30570
				RHE_RS02340				RHE_RS08525			RHE_RS02315	RHE_RS02315			RHE_RS22620				RHE_RS30745			RHE_RS06635				RHE_RS30745	RHE_RS30745
cluster_63				RHE_RS02315				RHE_RS08535			RHE_RS02310	RHE_RS02310			RHE_RS14115	RHE_RS14115			RHE_RS31500			RHE_RS06635				RHE_RS31500	RHE_RS31500
RHE_RS13805				RHE_RS02310				RHE_RS08540			RHE_RS02165	RHE_RS02165							RHE_RS32370			RHE_RS06680				RHE_RS32370	RHE_RS32370
RHE_RS13800	RHE_RS13800			RHE_RS02165				RHE_RS08550			RHE_RS02045	RHE_RS02045							RHE_RS32435			RHE_RS06690				RHE_RS32435	RHE_RS32435
				RHE_RS02045				RHE_RS08560			RHE_RS01980	RHE_RS01980							RHE_RS32555			RHE_RS06705				RHE_RS32555	RHE_RS32555
				RHE_RS01980				RHE_RS08570			RHE_RS01740	RHE_RS01740			cluster_100				RHE_RS32675			RHE_RS06705				RHE_RS32675	RHE_RS32675
				RHE_RS01740				RHE_RS08630			RHE_RS01720	RHE_RS01720			RHE_RS14150	RHE_RS14150			RHE_RS33140			RHE_RS06730				RHE_RS33140	RHE_RS33140
cluster_64				RHE_RS01720				RHE_RS08660			RHE_RS01660	RHE_RS01660			RHE_RS05255	RHE_RS05255						RHE_RS06820				RHE_RS00095
RHE_RS23080	RHE_RS23080			RHE_RS01660				RHE_RS08675			RHE_RS01480	RHE_RS01480										RHE_RS06825				RHE_RS00195
RHE_RS14160	RHE_RS14160			RHE_RS01480				RHE_RS08685			RHE_RS01475	RHE_RS01475										RHE_RS06845				RHE_RS00280
RHE_RS13235	RHE_RS13235			RHE_RS01475				RHE_RS08695			RHE_RS01430	RHE_RS01430										RHE_RS06875				RHE_RS00395
RHE_RS14165				RHE_RS01430				RHE_RS08700			RHE_RS01350	RHE_RS01350			cluster_102							RHE_RS06955				RHE_RS00490
				RHE_RS01350				RHE_RS08760			RHE_RS01265	RHE_RS01265			RHE_RS04705	RHE_RS04705						RHE_RS06955				RHE_RS00580
				RHE_RS01265				RHE_RS08765			RHE_RS01095	RHE_RS01095			RHE_RS04700							RHE_RS07055				RHE_RS00690
				RHE_RS01095				RHE_RS08785			RHE_RS00855	RHE_RS00855										RHE_RS07105				RHE_RS00730
cluster_65				RHE_RS00855				RHE_RS08915			RHE_RS00765	RHE_RS00765										RHE_RS07105				RHE_RS00815
RHE_RS23835	RHE_RS23835			RHE_RS00765				RHE_RS08920			RHE_RS00725	RHE_RS00725										RHE_RS07105				RHE_RS00850
RHE_RS06705	RHE_RS06705			RHE_RS00725				RHE_RS08925			RHE_RS00415	RHE_RS00415			cluster_104							RHE_RS07105				RHE_RS00955
RHE_RS06700				RHE_RS00415				RHE_RS08965			RHE_RS00380	RHE_RS00380			RHE_RS25120							RHE_RS07110				RHE_RS01030
				RHE_RS00380				RHE_RS08970			RHE_RS00340	RHE_RS00340			RHE_RS08855							RHE_RS07115				RHE_RS01125
				RHE_RS00340				RHE_RS08995			RHE_RS00285	RHE_RS00285			RHE_RS16760	RHE_RS16760						RHE_RS07115				RHE_RS01170
				RHE_RS00285				RHE_RS09015			RHE_RS00185	RHE_RS00185			RHE_RS27815							RHE_RS07145				RHE_RS01185
cluster_66				RHE_RS00185				RHE_RS09020			RHE_RS00015				RHE_RS22260							RHE_RS07145				RHE_RS01300
RHE_RS00855	RHE_RS00855							RHE_RS09025			RHE_RS00040				RHE_RS16120	RHE_RS16120						RHE_RS07145				RHE_RS01340
RHE_RS12535								RHE_RS09045			RHE_RS00045											RHE_RS07165				RHE_RS01345
								RHE_RS09080			RHE_RS00065											RHE_RS07210				RHE_RS01355
								RHE_RS09130			RHE_RS00070											RHE_RS07235				RHE_RS01390
								RHE_RS09160			RHE_RS00105				cluster_107							RHE_RS07235				RHE_RS01465
cluster_67								RHE_RS09175			RHE_RS00155				RHE_RS27185	RHE_RS27185						RHE_RS07420				RHE_RS01495
RHE_RS27520								RHE_RS09250			RHE_RS00190				RHE_RS27180							RHE_RS07425				RHE_RS01645
RHE_RS27525	RHE_RS27525							RHE_RS09255			RHE_RS00245				RHE_RS04155							RHE_RS07430				RHE_RS01655
								RHE_RS09260			RHE_RS00250				RHE_RS01740	RHE_RS01740						RHE_RS07440				RHE_RS01775
								RHE_RS09290			RHE_RS00255				RHE_RS18560	RHE_RS18560						RHE_RS07440				RHE_RS01780
								RHE_RS09310			RHE_RS00275				RHE_RS27170							RHE_RS07480				RHE_RS01790
cluster_68								RHE_RS09325			RHE_RS00300											RHE_RS07480				RHE_RS01840
RHE_RS02850								RHE_RS09355			RHE_RS00365											RHE_RS07675				RHE_RS01930
RHE_RS14515								RHE_RS09360			RHE_RS00410											RHE_RS07685				RHE_RS01975
RHE_RS02855	RHE_RS02855							RHE_RS09405			RHE_RS00460				cluster_108							RHE_RS07685				RHE_RS02130
								RHE_RS09445			RHE_RS00465				RHE_RS24100							RHE_RS07835				RHE_RS02135
								RHE_RS09475			RHE_RS00475				RHE_RS28555	RHE_RS28555						RHE_RS07835				RHE_RS02140
								RHE_RS09500			RHE_RS00480											RHE_RS07845				RHE_RS02190
cluster_69								RHE_RS09515			RHE_RS00495											RHE_RS07925				RHE_RS02195
RHE_RS16115								RHE_RS09535			RHE_RS00525											RHE_RS07935				RHE_RS02230
RHE_RS01550								RHE_RS09560			RHE_RS00550				cluster_110							RHE_RS08025				RHE_RS02290
RHE_RS16120	RHE_RS16120							RHE_RS09565			RHE_RS00575				RHE_RS03595	RHE_RS03595						RHE_RS08025				RHE_RS02330
								RHE_RS09570			RHE_RS00595				RHE_RS24980	RHE_RS24980						RHE_RS08095				RHE_RS02345
								RHE_RS09575			RHE_RS00670				RHE_RS02830							RHE_RS08125				RHE_RS02385
								RHE_RS09595			RHE_RS00680											RHE_RS08125				RHE_RS02395
cluster_70								RHE_RS09605			RHE_RS00695											RHE_RS08145				RHE_RS02420
RHE_RS24350	RHE_RS24350							RHE_RS09625			RHE_RS00700											RHE_RS08145				RHE_RS02425
RHE_RS04885								RHE_RS09650			RHE_RS00705				cluster_112							RHE_RS08145				RHE_RS02430
								RHE_RS09690			RHE_RS00735				RHE_RS05085							RHE_RS08155				RHE_RS02490
								RHE_RS09695			RHE_RS00740				RHE_RS03515	RHE_RS03515						RHE_RS08155				RHE_RS02555
								RHE_RS09700			RHE_RS00745				RHE_RS01265	RHE_RS01265						RHE_RS08350				RHE_RS02570
cluster_73								RHE_RS09720			RHE_RS00760											RHE_RS08370				RHE_RS02580
RHE_RS05175								RHE_RS09725			RHE_RS00870											RHE_RS08370				RHE_RS02595
RHE_RS05170	RHE_RS05170							RHE_RS09730			RHE_RS00880											RHE_RS08370				RHE_RS02640
								RHE_RS09770			RHE_RS00885				cluster_113							RHE_RS08370				RHE_RS02645
								RHE_RS09785			RHE_RS00895				RHE_RS27570	RHE_RS27570						RHE_RS08755				RHE_RS02680
								RHE_RS09790			RHE_RS00990				RHE_RS10680							RHE_RS08760				RHE_RS02720
cluster_77								RHE_RS09800			RHE_RS00995											RHE_RS08760				RHE_RS02790
RHE_RS03515	RHE_RS03515							RHE_RS09835			RHE_RS01005											RHE_RS08770				RHE_RS02800
RHE_RS03520								RHE_RS09845			RHE_RS01020											RHE_RS08775				RHE_RS02825
RHE_RS28625	RHE_RS28625							RHE_RS09860			RHE_RS01035				cluster_114							RHE_RS08785				RHE_RS02830
RHE_RS20695								RHE_RS09865			RHE_RS01055				RHE_RS22600							RHE_RS08855				RHE_RS02890
RHE_RS25840	RHE_RS25840							RHE_RS09875			RHE_RS01075				RHE_RS09960							RHE_RS08895				RHE_RS02975
								RHE_RS09970			RHE_RS01080				RHE_RS25540	RHE_RS25540						RHE_RS08895				RHE_RS03045
								RHE_RS09990			RHE_RS01135				RHE_RS23565							RHE_RS08920				RHE_RS03110
								RHE_RS09995			RHE_RS01155				RHE_RS02045	RHE_RS02045						RHE_RS08925				RHE_RS03145
cluster_78								RHE_RS10095			RHE_RS01160				RHE_RS25835	RHE_RS25835						RHE_RS08925				RHE_RS03150
RHE_RS13180	RHE_RS13180							RHE_RS10220			RHE_RS01250				RHE_RS15440							RHE_RS08925				RHE_RS03170
RHE_RS13170								RHE_RS10265			RHE_RS01260				RHE_RS14100	RHE_RS14100						RHE_RS08955				RHE_RS03330
RHE_RS23635	RHE_RS23635							RHE_RS10285			RHE_RS01315				RHE_RS14765							RHE_RS08955				RHE_RS03465
RHE_RS04330								RHE_RS10345			RHE_RS01320				RHE_RS06135	RHE_RS06135						RHE_RS08960				RHE_RS03575
RHE_RS18035	RHE_RS18035							RHE_RS10425			RHE_RS01360				RHE_RS25290	RHE_RS25290						RHE_RS08975				RHE_RS03645
RHE_RS14375								RHE_RS10445			RHE_RS01445				RHE_RS11520							RHE_RS08975				RHE_RS03750
RHE_RS02715	RHE_RS02715							RHE_RS10485			RHE_RS01540				RHE_RS09225							RHE_RS08980				RHE_RS03770
RHE_RS20735								RHE_RS10510			RHE_RS01545				RHE_RS07235							RHE_RS08980				RHE_RS03915
RHE_RS11435								RHE_RS10515			RHE_RS01550				RHE_RS18085	RHE_RS18085						RHE_RS09005				RHE_RS03950
RHE_RS12490								RHE_RS10520			RHE_RS01630				RHE_RS10510	RHE_RS10510						RHE_RS09005				RHE_RS03990
RHE_RS07690								RHE_RS10540			RHE_RS01675				RHE_RS21210							RHE_RS09015				RHE_RS04040
RHE_RS02610								RHE_RS10545			RHE_RS01700				RHE_RS14770	RHE_RS14770						RHE_RS09025				RHE_RS04105
								RHE_RS10550			RHE_RS01735				RHE_RS11740	RHE_RS11740						RHE_RS09025				RHE_RS04115
								RHE_RS10580			RHE_RS01815				RHE_RS28010	RHE_RS28010						RHE_RS09030				RHE_RS04155
								RHE_RS10640			RHE_RS01845											RHE_RS09045				RHE_RS04225
cluster_80								RHE_RS10645			RHE_RS01855											RHE_RS09075				RHE_RS04265
RHE_RS25060	RHE_RS25060							RHE_RS10650			RHE_RS01870											RHE_RS09075				RHE_RS04340
RHE_RS25065								RHE_RS10660			RHE_RS01925				cluster_115							RHE_RS09075				RHE_RS04490
								RHE_RS10710			RHE_RS01935				RHE_RS28725	RHE_RS28725						RHE_RS09080				RHE_RS04495
								RHE_RS10715			RHE_RS01995				RHE_RS28720							RHE_RS09080				RHE_RS04545
								RHE_RS10725			RHE_RS02015											RHE_RS09090				RHE_RS04550
cluster_81								RHE_RS10735			RHE_RS02055											RHE_RS09115				RHE_RS04555
RHE_RS20175								RHE_RS10745			RHE_RS02060											RHE_RS09115				RHE_RS04650
RHE_RS06410								RHE_RS10760			RHE_RS02070				cluster_119							RHE_RS09115				RHE_RS04700
RHE_RS05495	RHE_RS05495							RHE_RS10795			RHE_RS02075				RHE_RS14990							RHE_RS09115				RHE_RS04970
RHE_RS12535								RHE_RS10800			RHE_RS02080				RHE_RS24760	RHE_RS24760						RHE_RS09130				RHE_RS04985
RHE_RS00740								RHE_RS10805			RHE_RS02115				RHE_RS24755	RHE_RS24755						RHE_RS09130				RHE_RS04995
RHE_RS20625	RHE_RS20625							RHE_RS10825			RHE_RS02120				RHE_RS08760	RHE_RS08760						RHE_RS09165				RHE_RS05085
RHE_RS11255								RHE_RS10890			RHE_RS02235				RHE_RS08755							RHE_RS09165				RHE_RS05110
RHE_RS19595								RHE_RS10920			RHE_RS02320				RHE_RS08155							RHE_RS09210				RHE_RS05120
RHE_RS09720								RHE_RS10960			RHE_RS02365											RHE_RS09210				RHE_RS05140
RHE_RS21030								RHE_RS10975			RHE_RS02410											RHE_RS09225				RHE_RS05300
RHE_RS15170								RHE_RS11005			RHE_RS02485											RHE_RS09225				RHE_RS05340
RHE_RS20320								RHE_RS11060			RHE_RS02560				cluster_121							RHE_RS09235				RHE_RS05385
RHE_RS05335								RHE_RS11075			RHE_RS02610				RHE_RS18240							RHE_RS09235				RHE_RS05420
RHE_RS10920	RHE_RS10920							RHE_RS11085			RHE_RS02615				RHE_RS18235	RHE_RS18235						RHE_RS09265				RHE_RS05425
RHE_RS11250								RHE_RS11145			RHE_RS02620				RHE_RS14190							RHE_RS09265				RHE_RS05445
RHE_RS18535								RHE_RS11170			RHE_RS02635				RHE_RS14185	RHE_RS14185						RHE_RS09390				RHE_RS05465
RHE_RS05330	RHE_RS05330							RHE_RS11185			RHE_RS02675											RHE_RS09390				RHE_RS05555
								RHE_RS11190			RHE_RS02695											RHE_RS09410				RHE_RS05560
								RHE_RS11195			RHE_RS02725											RHE_RS09445				RHE_RS05640
								RHE_RS11200			RHE_RS02750				cluster_122							RHE_RS09445				RHE_RS05850
cluster_84								RHE_RS11205			RHE_RS02770				RHE_RS22015							RHE_RS09465				RHE_RS05940
RHE_RS17720								RHE_RS11220			RHE_RS02780				RHE_RS22020	RHE_RS22020						RHE_RS09465				RHE_RS05965
RHE_RS02600	RHE_RS02600							RHE_RS11230			RHE_RS02810				RHE_RS18795	RHE_RS18795						RHE_RS09505				RHE_RS05980
RHE_RS20770								RHE_RS11250			RHE_RS02850				RHE_RS01170							RHE_RS09660				RHE_RS06030
RHE_RS30795								RHE_RS11255			RHE_RS02910											RHE_RS09670				RHE_RS06045
RHE_RS12775	RHE_RS12775							RHE_RS11265			RHE_RS02955											RHE_RS09715				RHE_RS06055
RHE_RS08685								RHE_RS11280			RHE_RS03025											RHE_RS09750				RHE_RS06065
RHE_RS11690	RHE_RS11690							RHE_RS11300			RHE_RS03030				cluster_123							RHE_RS09960				RHE_RS06095
RHE_RS18125								RHE_RS11305			RHE_RS03195				RHE_RS16545							RHE_RS10220				RHE_RS06115
RHE_RS24480								RHE_RS11330			RHE_RS03205				RHE_RS22830	RHE_RS22830						RHE_RS10365				RHE_RS06160
RHE_RS01480	RHE_RS01480							RHE_RS11340			RHE_RS03290											RHE_RS10375				RHE_RS06210
RHE_RS10285								RHE_RS11370			RHE_RS03315											RHE_RS10375				RHE_RS06260
RHE_RS04015								RHE_RS11380			RHE_RS03380											RHE_RS10390				RHE_RS06265
RHE_RS05570								RHE_RS11385			RHE_RS03390				cluster_126							RHE_RS10390				RHE_RS06280
RHE_RS04030	RHE_RS04030							RHE_RS11415			RHE_RS03405				RHE_RS03720	RHE_RS03720						RHE_RS10400				RHE_RS06290
RHE_RS10825								RHE_RS11435			RHE_RS03450				RHE_RS04650							RHE_RS10400				RHE_RS06320
RHE_RS29525								RHE_RS11465			RHE_RS03485				RHE_RS04655	RHE_RS04655						RHE_RS10410				RHE_RS06380
RHE_RS01540								RHE_RS11475			RHE_RS03490				RHE_RS11520							RHE_RS10410				RHE_RS06395
RHE_RS29170								RHE_RS11525			RHE_RS03500											RHE_RS10410				RHE_RS06495
RHE_RS20540								RHE_RS11535			RHE_RS03505											RHE_RS10420				RHE_RS06635
RHE_RS02910								RHE_RS11540			RHE_RS03520											RHE_RS10420				RHE_RS06680
RHE_RS01315								RHE_RS11555			RHE_RS03545				cluster_127							RHE_RS10420				RHE_RS06690
RHE_RS16660								RHE_RS11590			RHE_RS03580				RHE_RS24620	RHE_RS24620						RHE_RS10420				RHE_RS06730
RHE_RS08540								RHE_RS11615			RHE_RS03615				RHE_RS02045	RHE_RS02045						RHE_RS10425				RHE_RS06820
RHE_RS24475	RHE_RS24475							RHE_RS11635			RHE_RS03620				RHE_RS30500							RHE_RS10425				RHE_RS07055
								RHE_RS11640			RHE_RS03635				RHE_RS27280	RHE_RS27280						RHE_RS10425				RHE_RS07115
								RHE_RS11645			RHE_RS03640				RHE_RS08980							RHE_RS10425				RHE_RS07145
								RHE_RS11665			RHE_RS03680				RHE_RS28165							RHE_RS10445				RHE_RS07165
cluster_91								RHE_RS11675			RHE_RS03695				RHE_RS24615							RHE_RS10445				RHE_RS07235
RHE_RS17145	RHE_RS17145							RHE_RS11685			RHE_RS03790											RHE_RS10445				RHE_RS07420
RHE_RS06105	RHE_RS06105							RHE_RS11690			RHE_RS03870											RHE_RS10445				RHE_RS07425
RHE_RS00695								RHE_RS11740			RHE_RS03890											RHE_RS10485				RHE_RS07430
RHE_RS17140								RHE_RS11765			RHE_RS03970				cluster_128							RHE_RS10485				RHE_RS07440
RHE_RS06070								RHE_RS11805			RHE_RS03980				RHE_RS26605							RHE_RS10490				RHE_RS07675
RHE_RS25865								RHE_RS11815			RHE_RS03995				RHE_RS25540	RHE_RS25540						RHE_RS10510				RHE_RS07845
								RHE_RS11820			RHE_RS04015				RHE_RS09165							RHE_RS10510				RHE_RS07935
								RHE_RS11840			RHE_RS04020				RHE_RS05560							RHE_RS10510				RHE_RS08095
								RHE_RS11855			RHE_RS04060				RHE_RS24490							RHE_RS10545				RHE_RS08125
cluster_92								RHE_RS11860			RHE_RS04070				RHE_RS25465							RHE_RS10545				RHE_RS08145
RHE_RS00250								RHE_RS11865			RHE_RS04080				RHE_RS06875	RHE_RS06875						RHE_RS10580				RHE_RS08155
RHE_RS01660	RHE_RS01660							RHE_RS11870			RHE_RS04090				RHE_RS03515	RHE_RS03515						RHE_RS10580				RHE_RS08370
RHE_RS00245								RHE_RS11890			RHE_RS04100				RHE_RS26350							RHE_RS10640				RHE_RS08755
								RHE_RS11945			RHE_RS04120				RHE_RS16230	RHE_RS16230						RHE_RS10680				RHE_RS08770
								RHE_RS11950			RHE_RS04150				RHE_RS26355	RHE_RS26355						RHE_RS10680				RHE_RS08775
								RHE_RS11955			RHE_RS04190				RHE_RS04555							RHE_RS10750				RHE_RS08855
cluster_93								RHE_RS11975			RHE_RS04235				RHE_RS23865							RHE_RS10775				RHE_RS08895
RHE_RS02850								RHE_RS12025			RHE_RS04330				RHE_RS16330							RHE_RS10775				RHE_RS08955
RHE_RS02855	RHE_RS02855							RHE_RS12030			RHE_RS04350				RHE_RS06030							RHE_RS10885				RHE_RS08960
RHE_RS15195								RHE_RS12035			RHE_RS04370				RHE_RS13525							RHE_RS10885				RHE_RS08975
RHE_RS04420								RHE_RS12060			RHE_RS04375				RHE_RS17205							RHE_RS10885				RHE_RS08980
RHE_RS14820								RHE_RS12095			RHE_RS04380				RHE_RS24975							RHE_RS10885				RHE_RS09005
RHE_RS26030								RHE_RS12100			RHE_RS04420				RHE_RS02355	RHE_RS02355						RHE_RS10890				RHE_RS09030
								RHE_RS12170			RHE_RS04435				RHE_RS10890	RHE_RS10890						RHE_RS10890				RHE_RS09075
								RHE_RS12175			RHE_RS04455				RHE_RS24110	RHE_RS24110						RHE_RS10890				RHE_RS09090
								RHE_RS12185			RHE_RS04460				RHE_RS05445							RHE_RS10890				RHE_RS09115
cluster_94								RHE_RS12205			RHE_RS04465				RHE_RS17595	RHE_RS17595						RHE_RS10930				RHE_RS09165
RHE_RS05175								RHE_RS12215			RHE_RS04485				RHE_RS27645	RHE_RS27645						RHE_RS10930				RHE_RS09210
RHE_RS07750								RHE_RS12220			RHE_RS04500				RHE_RS22795							RHE_RS10930				RHE_RS09225
RHE_RS04150								RHE_RS12325			RHE_RS04510				RHE_RS22790							RHE_RS10940				RHE_RS09235
RHE_RS05170	RHE_RS05170							RHE_RS12350			RHE_RS04525				RHE_RS28380							RHE_RS10940				RHE_RS09265
RHE_RS05335								RHE_RS12355			RHE_RS04535				RHE_RS24980	RHE_RS24980						RHE_RS10960				RHE_RS09390
RHE_RS05330	RHE_RS05330							RHE_RS12415			RHE_RS04570				RHE_RS08960							RHE_RS10960				RHE_RS09410
								RHE_RS12460			RHE_RS04590				RHE_RS02430							RHE_RS10960				RHE_RS09465
								RHE_RS12490			RHE_RS04595				RHE_RS13955							RHE_RS10970				RHE_RS09505
								RHE_RS12520			RHE_RS04720				RHE_RS25455	RHE_RS25455						RHE_RS10970				RHE_RS09660
cluster_96								RHE_RS12525			RHE_RS04735				RHE_RS25890							RHE_RS10990				RHE_RS09670
RHE_RS18680	RHE_RS18680							RHE_RS12535			RHE_RS04835				RHE_RS02425							RHE_RS11040				RHE_RS09715
RHE_RS18135	RHE_RS18135							RHE_RS12540			RHE_RS04855				RHE_RS26280	RHE_RS26280						RHE_RS11075				RHE_RS09750
RHE_RS18675								RHE_RS12545			RHE_RS04885				RHE_RS17210							RHE_RS11260				RHE_RS09960
RHE_RS14055	RHE_RS14055							RHE_RS12560			RHE_RS04950				RHE_RS23565							RHE_RS11260				RHE_RS10365
								RHE_RS12580			RHE_RS04955				RHE_RS23180	RHE_RS23180						RHE_RS11295				RHE_RS10375
								RHE_RS12585			RHE_RS05065				RHE_RS02570							RHE_RS11340				RHE_RS10390
								RHE_RS12615			RHE_RS05105				RHE_RS12060	RHE_RS12060						RHE_RS11355				RHE_RS10400
cluster_98								RHE_RS12620			RHE_RS05175				RHE_RS28370	RHE_RS28370						RHE_RS11360				RHE_RS10410
RHE_RS00765	RHE_RS00765							RHE_RS12660			RHE_RS05185				RHE_RS09235							RHE_RS11360				RHE_RS10420
RHE_RS25605	RHE_RS25605							RHE_RS12670			RHE_RS05190				RHE_RS10885							RHE_RS11360				RHE_RS10490
RHE_RS05315	RHE_RS05315							RHE_RS12715			RHE_RS05195				RHE_RS19030	RHE_RS19030						RHE_RS11445				RHE_RS10680
RHE_RS14390								RHE_RS12775			RHE_RS05220				RHE_RS23920							RHE_RS11520				RHE_RS10750
RHE_RS05725								RHE_RS12890			RHE_RS05260											RHE_RS11520				RHE_RS10775
RHE_RS17835	RHE_RS17835							RHE_RS12915			RHE_RS05335											RHE_RS11520				RHE_RS10885
								RHE_RS12920			RHE_RS05450											RHE_RS11595				RHE_RS10930
								RHE_RS12925			RHE_RS05515				cluster_129							RHE_RS11625				RHE_RS10940
								RHE_RS12940			RHE_RS05570				RHE_RS16030							RHE_RS11690				RHE_RS10970
cluster_100								RHE_RS12965			RHE_RS05615				RHE_RS15440							RHE_RS11740				RHE_RS10990
RHE_RS06215	RHE_RS06215							RHE_RS12970			RHE_RS05655				RHE_RS18035	RHE_RS18035						RHE_RS11740				RHE_RS11040
RHE_RS11205								RHE_RS12990			RHE_RS05725				RHE_RS16035							RHE_RS11860				RHE_RS11260
RHE_RS02410								RHE_RS13000			RHE_RS05780				RHE_RS07935							RHE_RS11900				RHE_RS11295
RHE_RS23630								RHE_RS13020			RHE_RS05820											RHE_RS11900				RHE_RS11355
RHE_RS11200								RHE_RS13025			RHE_RS05865											RHE_RS11905				RHE_RS11360
								RHE_RS13050			RHE_RS05935											RHE_RS11905				RHE_RS11445
								RHE_RS13060			RHE_RS05950				cluster_130							RHE_RS11960				RHE_RS11520
								RHE_RS13070			RHE_RS06000				RHE_RS30305							RHE_RS11960				RHE_RS11595
cluster_101								RHE_RS13135			RHE_RS06005				RHE_RS02355	RHE_RS02355						RHE_RS12000				RHE_RS11625
RHE_RS02710	RHE_RS02710							RHE_RS13170			RHE_RS06010											RHE_RS12035				RHE_RS11900
RHE_RS10745								RHE_RS13180			RHE_RS06050											RHE_RS12035				RHE_RS11905
								RHE_RS13190			RHE_RS06070											RHE_RS12035				RHE_RS11960
								RHE_RS13195			RHE_RS06195				cluster_131							RHE_RS12060				RHE_RS12000
								RHE_RS13215			RHE_RS06200				RHE_RS18035	RHE_RS18035						RHE_RS12060				RHE_RS12090
cluster_104								RHE_RS13235			RHE_RS06235				RHE_RS17845							RHE_RS12060				RHE_RS12120
RHE_RS00895								RHE_RS13290			RHE_RS06240											RHE_RS12065				RHE_RS12125
RHE_RS12215								RHE_RS13295			RHE_RS06250											RHE_RS12090				RHE_RS12200
RHE_RS12220								RHE_RS13345			RHE_RS06305											RHE_RS12120				RHE_RS12285
RHE_RS24505								RHE_RS13410			RHE_RS06325				cluster_132							RHE_RS12120				RHE_RS12330
RHE_RS28030								RHE_RS13450			RHE_RS06345				RHE_RS17175							RHE_RS12125				RHE_RS12340
RHE_RS03380								RHE_RS13580			RHE_RS06410				RHE_RS17170	RHE_RS17170						RHE_RS12200				RHE_RS12345
RHE_RS02715	RHE_RS02715							RHE_RS13695			RHE_RS06435											RHE_RS12200				RHE_RS12380
RHE_RS18100								RHE_RS13730			RHE_RS06560											RHE_RS12205				RHE_RS12420
								RHE_RS13740			RHE_RS06565											RHE_RS12205				RHE_RS12440
								RHE_RS13745			RHE_RS06590				cluster_135							RHE_RS12285				RHE_RS12575
								RHE_RS13750			RHE_RS06595				RHE_RS27930	RHE_RS27930						RHE_RS12325				RHE_RS12605
cluster_106								RHE_RS13770			RHE_RS06640				RHE_RS27935	RHE_RS27935						RHE_RS12325				RHE_RS12760
RHE_RS03040	RHE_RS03040							RHE_RS13800			RHE_RS06655											RHE_RS12325				RHE_RS12765
RHE_RS29335	RHE_RS29335							RHE_RS13805			RHE_RS06660											RHE_RS12325				RHE_RS12800
								RHE_RS13815			RHE_RS06685											RHE_RS12330				RHE_RS12810
								RHE_RS13820			RHE_RS06700				cluster_136							RHE_RS12340				RHE_RS12840
								RHE_RS13915			RHE_RS06725				RHE_RS23435							RHE_RS12345				RHE_RS12930
cluster_109								RHE_RS13960			RHE_RS06860				RHE_RS12440							RHE_RS12345				RHE_RS12975
RHE_RS28455								RHE_RS13965			RHE_RS06880				RHE_RS27490							RHE_RS12380				RHE_RS13075
RHE_RS28450	RHE_RS28450							RHE_RS13975			RHE_RS06895				RHE_RS22260							RHE_RS12415				RHE_RS13080
								RHE_RS13980			RHE_RS06960				RHE_RS22200							RHE_RS12415				RHE_RS13090
								RHE_RS14020			RHE_RS07005				RHE_RS02430							RHE_RS12420				RHE_RS13110
								RHE_RS14040			RHE_RS07015				RHE_RS12800							RHE_RS12420				RHE_RS13115
cluster_110								RHE_RS14050			RHE_RS07050				RHE_RS22245							RHE_RS12420				RHE_RS13150
RHE_RS10220	RHE_RS10220							RHE_RS14055			RHE_RS07065				RHE_RS15410							RHE_RS12440				RHE_RS13220
RHE_RS10920	RHE_RS10920							RHE_RS14100			RHE_RS07070				RHE_RS07145							RHE_RS12520				RHE_RS13240
								RHE_RS14115			RHE_RS07075				RHE_RS26795	RHE_RS26795						RHE_RS12520				RHE_RS13255
								RHE_RS14135			RHE_RS07140				RHE_RS16650							RHE_RS12575				RHE_RS13265
								RHE_RS14150			RHE_RS07205				RHE_RS12810							RHE_RS12575				RHE_RS13275
cluster_111								RHE_RS14160			RHE_RS07240				RHE_RS15160							RHE_RS12585				RHE_RS13300
RHE_RS00185	RHE_RS00185							RHE_RS14165			RHE_RS07245				RHE_RS25120							RHE_RS12605				RHE_RS13340
RHE_RS00190								RHE_RS14175			RHE_RS07275				RHE_RS23890							RHE_RS12620				RHE_RS13400
RHE_RS03610	RHE_RS03610							RHE_RS14185			RHE_RS07285				RHE_RS07845							RHE_RS12670				RHE_RS13430
RHE_RS00040								RHE_RS14210			RHE_RS07290				RHE_RS24290							RHE_RS12670				RHE_RS13440
RHE_RS00045								RHE_RS14215			RHE_RS07295				RHE_RS06820							RHE_RS12760				RHE_RS13495
RHE_RS18520	RHE_RS18520							RHE_RS14275			RHE_RS07300				RHE_RS13075							RHE_RS12760				RHE_RS13505
RHE_RS04590								RHE_RS14315			RHE_RS07305				RHE_RS26100							RHE_RS12765				RHE_RS13525
								RHE_RS14325			RHE_RS07320				RHE_RS11355							RHE_RS12765				RHE_RS13530
								RHE_RS14355			RHE_RS07330				RHE_RS02345							RHE_RS12775				RHE_RS13545
								RHE_RS14375			RHE_RS07350				RHE_RS15050							RHE_RS12775				RHE_RS13630
cluster_112								RHE_RS14390			RHE_RS07365				RHE_RS25585							RHE_RS12800				RHE_RS13635
RHE_RS02075								RHE_RS14475			RHE_RS07375				RHE_RS26680	RHE_RS26680						RHE_RS12800				RHE_RS13675
RHE_RS04735								RHE_RS14490			RHE_RS07380				RHE_RS16740							RHE_RS12810				RHE_RS13735
RHE_RS01160								RHE_RS14515			RHE_RS07510				RHE_RS26805							RHE_RS12840				RHE_RS13755
RHE_RS18190								RHE_RS14540			RHE_RS07590				RHE_RS09210							RHE_RS12840				RHE_RS13775
RHE_RS03430	RHE_RS03430							RHE_RS14615			RHE_RS07595				RHE_RS16765							RHE_RS12915				RHE_RS13810
RHE_RS04100								RHE_RS14640			RHE_RS07645				RHE_RS16760	RHE_RS16760						RHE_RS12920				RHE_RS13835
RHE_RS11955								RHE_RS14645			RHE_RS07670				RHE_RS14000							RHE_RS12920				RHE_RS13845
RHE_RS11950								RHE_RS14685			RHE_RS07690											RHE_RS12920				RHE_RS13880
RHE_RS29945								RHE_RS14695			RHE_RS07750											RHE_RS12930				RHE_RS13930
RHE_RS19935								RHE_RS14710			RHE_RS07755											RHE_RS12930				RHE_RS13940
RHE_RS01020								RHE_RS14720			RHE_RS07760				cluster_140							RHE_RS12930				RHE_RS13955
RHE_RS24565								RHE_RS14740			RHE_RS07800				RHE_RS25165							RHE_RS12940				RHE_RS13970
RHE_RS09175								RHE_RS14755			RHE_RS07975				RHE_RS29840	RHE_RS29840						RHE_RS12975				RHE_RS14000
RHE_RS09865								RHE_RS14770			RHE_RS08035				RHE_RS16260							RHE_RS12990				RHE_RS14140
RHE_RS17710								RHE_RS14820			RHE_RS08055				RHE_RS02595							RHE_RS12990				RHE_RS14145
RHE_RS14275								RHE_RS14830			RHE_RS08065											RHE_RS13060				RHE_RS14170
RHE_RS21975								RHE_RS14875			RHE_RS08080											RHE_RS13060				RHE_RS14190
RHE_RS03500								RHE_RS14885			RHE_RS08085											RHE_RS13075				RHE_RS14280
RHE_RS26165								RHE_RS14905			RHE_RS08090				cluster_141							RHE_RS13080				RHE_RS14295
RHE_RS03505								RHE_RS14920			RHE_RS08130				RHE_RS23050							RHE_RS13080				RHE_RS14395
RHE_RS17020								RHE_RS14965			RHE_RS08150				RHE_RS18970	RHE_RS18970						RHE_RS13090				RHE_RS14410
RHE_RS07975								RHE_RS14985			RHE_RS08160				RHE_RS08785	RHE_RS08785						RHE_RS13110				RHE_RS14485
RHE_RS19710								RHE_RS15015			RHE_RS08205				RHE_RS00185	RHE_RS00185						RHE_RS13115				RHE_RS14500
RHE_RS00700								RHE_RS15025			RHE_RS08215				RHE_RS23055	RHE_RS23055						RHE_RS13115				RHE_RS14575
RHE_RS14540								RHE_RS15040			RHE_RS08240											RHE_RS13150				RHE_RS14650
RHE_RS00705								RHE_RS15070			RHE_RS08260											RHE_RS13180				RHE_RS14675
RHE_RS01035								RHE_RS15090			RHE_RS08275											RHE_RS13190				RHE_RS14700
RHE_RS17660								RHE_RS15110			RHE_RS08300				cluster_143							RHE_RS13215				RHE_RS14750
RHE_RS19440								RHE_RS15125			RHE_RS08320				RHE_RS25165							RHE_RS13215				RHE_RS14760
RHE_RS20020								RHE_RS15165			RHE_RS08385				RHE_RS25170	RHE_RS25170						RHE_RS13220				RHE_RS14765
RHE_RS19425	RHE_RS19425							RHE_RS15170			RHE_RS08405											RHE_RS13220				RHE_RS14810
								RHE_RS15185			RHE_RS08410											RHE_RS13235				RHE_RS14860
								RHE_RS15190			RHE_RS08430											RHE_RS13235				RHE_RS14870
								RHE_RS15195			RHE_RS08455				cluster_144							RHE_RS13235				RHE_RS14990
cluster_114								RHE_RS15200			RHE_RS08515				RHE_RS14875	RHE_RS14875						RHE_RS13235				RHE_RS15050
RHE_RS25320								RHE_RS15210			RHE_RS08525				RHE_RS27170							RHE_RS13240				RHE_RS15135
RHE_RS08320								RHE_RS15215			RHE_RS08535				RHE_RS14870							RHE_RS13240				RHE_RS15155
RHE_RS10795								RHE_RS15225			RHE_RS08540											RHE_RS13240				RHE_RS15160
RHE_RS17145	RHE_RS17145							RHE_RS15305			RHE_RS08550											RHE_RS13255				RHE_RS15180
RHE_RS11870								RHE_RS15360			RHE_RS08560											RHE_RS13265				RHE_RS15240
RHE_RS14695								RHE_RS15375			RHE_RS08570				cluster_145							RHE_RS13275				RHE_RS15350
RHE_RS02710	RHE_RS02710							RHE_RS15385			RHE_RS08630				RHE_RS28305	RHE_RS28305						RHE_RS13295				RHE_RS15395
RHE_RS00070								RHE_RS15405			RHE_RS08660				RHE_RS32880							RHE_RS13295				RHE_RS15410
RHE_RS04375								RHE_RS15415			RHE_RS08675											RHE_RS13295				RHE_RS15440
RHE_RS04380								RHE_RS15430			RHE_RS08685											RHE_RS13300				RHE_RS15480
RHE_RS08260								RHE_RS15450			RHE_RS08695											RHE_RS13340				RHE_RS15590
RHE_RS17140								RHE_RS15500			RHE_RS08700				cluster_148							RHE_RS13370				RHE_RS15610
RHE_RS15040	RHE_RS15040							RHE_RS15515			RHE_RS08765				RHE_RS04650							RHE_RS13400				RHE_RS15665
								RHE_RS15555			RHE_RS08915				RHE_RS04655	RHE_RS04655						RHE_RS13430				RHE_RS15700
								RHE_RS15560			RHE_RS08965											RHE_RS13440				RHE_RS15740
								RHE_RS15570			RHE_RS08970											RHE_RS13495				RHE_RS15805
cluster_116								RHE_RS15585			RHE_RS08995											RHE_RS13505				RHE_RS15830
RHE_RS30975								RHE_RS15605			RHE_RS09020				cluster_152							RHE_RS13505				RHE_RS15870
RHE_RS23465	RHE_RS23465							RHE_RS15650			RHE_RS09160				RHE_RS10960	RHE_RS10960						RHE_RS13505				RHE_RS15880
RHE_RS09025	RHE_RS09025							RHE_RS15675			RHE_RS09175				RHE_RS14875	RHE_RS14875						RHE_RS13525				RHE_RS15910
RHE_RS09020								RHE_RS15695			RHE_RS09250				RHE_RS24620	RHE_RS24620						RHE_RS13530				RHE_RS15970
								RHE_RS15725			RHE_RS09255				RHE_RS29975	RHE_RS29975						RHE_RS13530				RHE_RS16030
								RHE_RS15755			RHE_RS09260				RHE_RS06015	RHE_RS06015						RHE_RS13545				RHE_RS16035
								RHE_RS15775			RHE_RS09290				RHE_RS04625	RHE_RS04625						RHE_RS13630				RHE_RS16040
cluster_117								RHE_RS15785			RHE_RS09310				RHE_RS08925	RHE_RS08925						RHE_RS13635				RHE_RS16110
RHE_RS12525								RHE_RS15800			RHE_RS09325				RHE_RS24615							RHE_RS13675				RHE_RS16210
RHE_RS15225	RHE_RS15225							RHE_RS15815			RHE_RS09355				RHE_RS14870							RHE_RS13695				RHE_RS16260
								RHE_RS15835			RHE_RS09360											RHE_RS13735				RHE_RS16330
								RHE_RS15875			RHE_RS09405											RHE_RS13735				RHE_RS16420
								RHE_RS15885			RHE_RS09475											RHE_RS13735				RHE_RS16425
cluster_126								RHE_RS15890			RHE_RS09500				cluster_153							RHE_RS13735				RHE_RS16435
RHE_RS14150	RHE_RS14150							RHE_RS15900			RHE_RS09515				RHE_RS28020	RHE_RS28020						RHE_RS13750				RHE_RS16475
RHE_RS05255	RHE_RS05255							RHE_RS15905			RHE_RS09535				RHE_RS00395							RHE_RS13750				RHE_RS16510
								RHE_RS15925			RHE_RS09560											RHE_RS13750				RHE_RS16545
								RHE_RS15950			RHE_RS09565											RHE_RS13755				RHE_RS16555
								RHE_RS15960			RHE_RS09570											RHE_RS13770				RHE_RS16590
cluster_129								RHE_RS15965			RHE_RS09575				cluster_155							RHE_RS13775				RHE_RS16610
RHE_RS19695	RHE_RS19695							RHE_RS15980			RHE_RS09595				RHE_RS00855	RHE_RS00855						RHE_RS13800				RHE_RS16650
RHE_RS19700								RHE_RS15995			RHE_RS09605				RHE_RS00850							RHE_RS13810				RHE_RS16740
								RHE_RS16100			RHE_RS09625											RHE_RS13835				RHE_RS16765
								RHE_RS16115			RHE_RS09650											RHE_RS13835				RHE_RS16785
								RHE_RS16120			RHE_RS09690											RHE_RS13845				RHE_RS16880
cluster_131								RHE_RS16135			RHE_RS09695				cluster_156							RHE_RS13845				RHE_RS16895
RHE_RS23880								RHE_RS16180			RHE_RS09700				RHE_RS14140							RHE_RS13880				RHE_RS16970
RHE_RS23885	RHE_RS23885							RHE_RS16185			RHE_RS09720				RHE_RS14135	RHE_RS14135						RHE_RS13930				RHE_RS17040
								RHE_RS16195			RHE_RS09725				RHE_RS09115							RHE_RS13940				RHE_RS17105
								RHE_RS16200			RHE_RS09730											RHE_RS13955				RHE_RS17175
								RHE_RS16205			RHE_RS09770											RHE_RS13955				RHE_RS17180
cluster_132								RHE_RS16220			RHE_RS09785											RHE_RS13970				RHE_RS17205
RHE_RS00415	RHE_RS00415							RHE_RS16230			RHE_RS09790				cluster_157							RHE_RS13970				RHE_RS17210
RHE_RS05495	RHE_RS05495							RHE_RS16235			RHE_RS09800				RHE_RS13240							RHE_RS14000				RHE_RS17240
RHE_RS12415	RHE_RS12415							RHE_RS16325			RHE_RS09835				RHE_RS27240	RHE_RS27240						RHE_RS14100				RHE_RS17260
RHE_RS17605								RHE_RS16340			RHE_RS09845											RHE_RS14115				RHE_RS17320
RHE_RS16205	RHE_RS16205							RHE_RS16345			RHE_RS09860											RHE_RS14135				RHE_RS17330
RHE_RS16200								RHE_RS16350			RHE_RS09865											RHE_RS14135				RHE_RS17400
								RHE_RS16415			RHE_RS09875				cluster_163							RHE_RS14135				RHE_RS17515
								RHE_RS16480			RHE_RS09970				RHE_RS02790							RHE_RS14140				RHE_RS17645
								RHE_RS16530			RHE_RS09990				RHE_RS22560							RHE_RS14140				RHE_RS17760
cluster_133								RHE_RS16565			RHE_RS09995				RHE_RS13190	RHE_RS13190						RHE_RS14140				RHE_RS17805
RHE_RS17050	RHE_RS17050							RHE_RS16615			RHE_RS10095				RHE_RS01495							RHE_RS14145				RHE_RS17815
RHE_RS17045								RHE_RS16660			RHE_RS10265											RHE_RS14150				RHE_RS17830
RHE_RS01080								RHE_RS16670			RHE_RS10285											RHE_RS14160				RHE_RS17845
RHE_RS14740								RHE_RS16675			RHE_RS10345											RHE_RS14170				RHE_RS17940
RHE_RS26165								RHE_RS16700			RHE_RS10515				cluster_168							RHE_RS14175				RHE_RS17955
RHE_RS01075								RHE_RS16735			RHE_RS10520				RHE_RS24755	RHE_RS24755						RHE_RS14175				RHE_RS18140
RHE_RS24090	RHE_RS24090							RHE_RS16755			RHE_RS10540				RHE_RS24760	RHE_RS24760						RHE_RS14175				RHE_RS18170
RHE_RS04510								RHE_RS16760			RHE_RS10550											RHE_RS14185				RHE_RS18175
RHE_RS03390								RHE_RS16800			RHE_RS10645											RHE_RS14185				RHE_RS18240
RHE_RS14540								RHE_RS16815			RHE_RS10650											RHE_RS14185				RHE_RS18250
								RHE_RS16825			RHE_RS10660				cluster_169							RHE_RS14190				RHE_RS18365
								RHE_RS16870			RHE_RS10710				RHE_RS09030							RHE_RS14190				RHE_RS18370
								RHE_RS16935			RHE_RS10715				RHE_RS06065							RHE_RS14190				RHE_RS18455
cluster_134								RHE_RS16945			RHE_RS10725				RHE_RS25205							RHE_RS14210				RHE_RS18690
RHE_RS25605	RHE_RS25605							RHE_RS17010			RHE_RS10735				RHE_RS23130	RHE_RS23130						RHE_RS14210				RHE_RS18765
RHE_RS28550								RHE_RS17020			RHE_RS10745											RHE_RS14280				RHE_RS18840
RHE_RS24095	RHE_RS24095							RHE_RS17030			RHE_RS10760											RHE_RS14295				RHE_RS19045
RHE_RS28555	RHE_RS28555							RHE_RS17045			RHE_RS10795											RHE_RS14295				RHE_RS19065
								RHE_RS17050			RHE_RS10800				cluster_171							RHE_RS14355				RHE_RS19100
								RHE_RS17055			RHE_RS10805				RHE_RS02340	RHE_RS02340						RHE_RS14395				RHE_RS19295
								RHE_RS17060			RHE_RS10825				RHE_RS02330							RHE_RS14410				RHE_RS19335
cluster_137								RHE_RS17085			RHE_RS10975				RHE_RS19300	RHE_RS19300						RHE_RS14410				RHE_RS19345
RHE_RS16760	RHE_RS16760							RHE_RS17090			RHE_RS11005											RHE_RS14410				RHE_RS19360
RHE_RS11535								RHE_RS17095			RHE_RS11060											RHE_RS14485				RHE_RS19485
RHE_RS20585								RHE_RS17115			RHE_RS11085											RHE_RS14500				RHE_RS19500
RHE_RS18705								RHE_RS17135			RHE_RS11145				cluster_172							RHE_RS14500				RHE_RS19690
RHE_RS16755								RHE_RS17140			RHE_RS11170				RHE_RS27270							RHE_RS14575				RHE_RS19830
								RHE_RS17145			RHE_RS11185				RHE_RS05315	RHE_RS05315						RHE_RS14605				RHE_RS19850
								RHE_RS17170			RHE_RS11190				RHE_RS30465							RHE_RS14605				RHE_RS20045
								RHE_RS17190			RHE_RS11195				RHE_RS22145							RHE_RS14650				RHE_RS20080
cluster_140								RHE_RS17195			RHE_RS11200											RHE_RS14675				RHE_RS20325
RHE_RS18560	RHE_RS18560							RHE_RS17200			RHE_RS11205											RHE_RS14675				RHE_RS20665
RHE_RS04150								RHE_RS17305			RHE_RS11220											RHE_RS14675				RHE_RS20810
								RHE_RS17405			RHE_RS11230				cluster_176							RHE_RS14700				RHE_RS20850
								RHE_RS17450			RHE_RS11250				RHE_RS03040	RHE_RS03040						RHE_RS14700				RHE_RS20885
								RHE_RS17565			RHE_RS11255				RHE_RS07210	RHE_RS07210						RHE_RS14750				RHE_RS20905
cluster_141								RHE_RS17595			RHE_RS11265				RHE_RS03045							RHE_RS14760				RHE_RS20915
RHE_RS09045	RHE_RS09045							RHE_RS17605			RHE_RS11280											RHE_RS14760				RHE_RS20950
RHE_RS28455								RHE_RS17640			RHE_RS11300											RHE_RS14765				RHE_RS21210
RHE_RS01675								RHE_RS17660			RHE_RS11305											RHE_RS14765				RHE_RS21310
RHE_RS04420								RHE_RS17670			RHE_RS11330				cluster_177							RHE_RS14770				RHE_RS21390
RHE_RS28450	RHE_RS28450							RHE_RS17710			RHE_RS11370				RHE_RS07110	RHE_RS07110						RHE_RS14770				RHE_RS21445
								RHE_RS17720			RHE_RS11380				RHE_RS07105	RHE_RS07105						RHE_RS14810				RHE_RS21540
								RHE_RS17755			RHE_RS11385											RHE_RS14810				RHE_RS21555
								RHE_RS17765			RHE_RS11415											RHE_RS14860				RHE_RS21685
cluster_143								RHE_RS17770			RHE_RS11435											RHE_RS14860				RHE_RS21825
RHE_RS23635	RHE_RS23635							RHE_RS17785			RHE_RS11465				cluster_179							RHE_RS14870				RHE_RS21830
RHE_RS04420								RHE_RS17835			RHE_RS11475				RHE_RS27930	RHE_RS27930						RHE_RS14870				RHE_RS22015
								RHE_RS17840			RHE_RS11525				RHE_RS27935	RHE_RS27935						RHE_RS14870				RHE_RS22045
								RHE_RS17915			RHE_RS11535											RHE_RS14875				RHE_RS22050
								RHE_RS17930			RHE_RS11540											RHE_RS14875				RHE_RS22145
cluster_146								RHE_RS17935			RHE_RS11555											RHE_RS14875				RHE_RS22155
RHE_RS05335								RHE_RS17980			RHE_RS11590				cluster_180							RHE_RS14905				RHE_RS22200
RHE_RS05330	RHE_RS05330							RHE_RS18010			RHE_RS11615				RHE_RS05265	RHE_RS05265						RHE_RS14920				RHE_RS22235
								RHE_RS18015			RHE_RS11635				RHE_RS25025							RHE_RS14920				RHE_RS22245
								RHE_RS18035			RHE_RS11640				RHE_RS13530							RHE_RS14990				RHE_RS22260
								RHE_RS18065			RHE_RS11645				RHE_RS15740							RHE_RS15040				RHE_RS22395
cluster_148								RHE_RS18085			RHE_RS11665				RHE_RS04985							RHE_RS15050				RHE_RS22560
RHE_RS16235								RHE_RS18090			RHE_RS11675				RHE_RS24490							RHE_RS15050				RHE_RS22600
RHE_RS16230	RHE_RS16230							RHE_RS18100			RHE_RS11685				RHE_RS23360							RHE_RS15070				RHE_RS22610
								RHE_RS18110			RHE_RS11765				RHE_RS07430							RHE_RS15070				RHE_RS22620
								RHE_RS18125			RHE_RS11805				RHE_RS12000							RHE_RS15090				RHE_RS22625
								RHE_RS18135			RHE_RS11815				RHE_RS02580							RHE_RS15090				RHE_RS22630
cluster_152								RHE_RS18145			RHE_RS11820				RHE_RS30635							RHE_RS15090				RHE_RS22640
RHE_RS13965	RHE_RS13965							RHE_RS18160			RHE_RS11840											RHE_RS15135				RHE_RS22650
RHE_RS25060	RHE_RS25060							RHE_RS18180			RHE_RS11855											RHE_RS15155				RHE_RS22705
RHE_RS25065								RHE_RS18190			RHE_RS11865											RHE_RS15160				RHE_RS22710
RHE_RS13960								RHE_RS18225			RHE_RS11870				cluster_182							RHE_RS15160				RHE_RS22740
RHE_RS14135	RHE_RS14135							RHE_RS18235			RHE_RS11890				RHE_RS32120							RHE_RS15180				RHE_RS22790
								RHE_RS18270			RHE_RS11945				RHE_RS23240							RHE_RS15210				RHE_RS22795
								RHE_RS18295			RHE_RS11950				RHE_RS22770	RHE_RS22770						RHE_RS15210				RHE_RS22960
								RHE_RS18325			RHE_RS11955				RHE_RS22090	RHE_RS22090						RHE_RS15225				RHE_RS23050
cluster_155								RHE_RS18340			RHE_RS11975				RHE_RS09075							RHE_RS15240				RHE_RS23105
RHE_RS13915								RHE_RS18350			RHE_RS12025				RHE_RS09080	RHE_RS09080						RHE_RS15240				RHE_RS23195
RHE_RS05820								RHE_RS18380			RHE_RS12030											RHE_RS15240				RHE_RS23240
RHE_RS09355								RHE_RS18475			RHE_RS12095											RHE_RS15350				RHE_RS23310
RHE_RS16480								RHE_RS18480			RHE_RS12100											RHE_RS15395				RHE_RS23360
RHE_RS09360								RHE_RS18505			RHE_RS12170				cluster_184							RHE_RS15405				RHE_RS23435
RHE_RS18990								RHE_RS18520			RHE_RS12175				RHE_RS02645							RHE_RS15410				RHE_RS23565
RHE_RS05815	RHE_RS05815							RHE_RS18525			RHE_RS12185				RHE_RS20580	RHE_RS20580						RHE_RS15440				RHE_RS23640
								RHE_RS18535			RHE_RS12215				RHE_RS11595							RHE_RS15440				RHE_RS23680
								RHE_RS18560			RHE_RS12220				RHE_RS20625	RHE_RS20625						RHE_RS15480				RHE_RS23690
								RHE_RS18580			RHE_RS12350				RHE_RS02640							RHE_RS15480				RHE_RS23735
cluster_157								RHE_RS18590			RHE_RS12355											RHE_RS15480				RHE_RS23840
RHE_RS20285	RHE_RS20285							RHE_RS18615			RHE_RS12490											RHE_RS15555				RHE_RS23865
RHE_RS27415	RHE_RS27415							RHE_RS18650			RHE_RS12525											RHE_RS15590				RHE_RS23890
RHE_RS20280								RHE_RS18655			RHE_RS12535				cluster_186							RHE_RS15590				RHE_RS23920
								RHE_RS18665			RHE_RS12540				RHE_RS06215	RHE_RS06215						RHE_RS15610				RHE_RS24010
								RHE_RS18675			RHE_RS12545				RHE_RS06705	RHE_RS06705						RHE_RS15665				RHE_RS24065
								RHE_RS18680			RHE_RS12560				RHE_RS06210							RHE_RS15675				RHE_RS24100
cluster_159								RHE_RS18685			RHE_RS12580											RHE_RS15700				RHE_RS24140
RHE_RS08760	RHE_RS08760							RHE_RS18695			RHE_RS12615											RHE_RS15700				RHE_RS24190
RHE_RS24755	RHE_RS24755							RHE_RS18705			RHE_RS12660											RHE_RS15700				RHE_RS24195
RHE_RS24760	RHE_RS24760							RHE_RS18710			RHE_RS12715				cluster_187							RHE_RS15700				RHE_RS24245
RHE_RS14475								RHE_RS18715			RHE_RS12890				RHE_RS12990	RHE_RS12990						RHE_RS15740				RHE_RS24290
								RHE_RS18745			RHE_RS12925				RHE_RS15890	RHE_RS15890						RHE_RS15740				RHE_RS24300
								RHE_RS18760			RHE_RS12965											RHE_RS15740				RHE_RS24320
								RHE_RS18795			RHE_RS12970											RHE_RS15755				RHE_RS24360
cluster_163								RHE_RS18835			RHE_RS13000											RHE_RS15755				RHE_RS24425
RHE_RS14875	RHE_RS14875							RHE_RS18845			RHE_RS13020				cluster_188							RHE_RS15755				RHE_RS24490
RHE_RS24620	RHE_RS24620							RHE_RS18860			RHE_RS13025				RHE_RS20285	RHE_RS20285						RHE_RS15805				RHE_RS24545
RHE_RS02045	RHE_RS02045							RHE_RS18865			RHE_RS13050				RHE_RS09235							RHE_RS15830				RHE_RS24570
RHE_RS08925	RHE_RS08925							RHE_RS18895			RHE_RS13135											RHE_RS15870				RHE_RS24615
RHE_RS24655								RHE_RS18900			RHE_RS13170											RHE_RS15870				RHE_RS24660
RHE_RS28780								RHE_RS18905			RHE_RS13195											RHE_RS15870				RHE_RS24745
RHE_RS15875								RHE_RS18930			RHE_RS13290				cluster_190							RHE_RS15880				RHE_RS24860
RHE_RS27280	RHE_RS27280							RHE_RS18935			RHE_RS13345				RHE_RS03990							RHE_RS15880				RHE_RS24975
RHE_RS15200								RHE_RS18940			RHE_RS13410				RHE_RS13970							RHE_RS15880				RHE_RS25025
RHE_RS15195								RHE_RS18970			RHE_RS13580				RHE_RS26695	RHE_RS26695						RHE_RS15890				RHE_RS25035
RHE_RS05935								RHE_RS18990			RHE_RS13730				RHE_RS17090	RHE_RS17090						RHE_RS15890				RHE_RS25120
RHE_RS20315								RHE_RS19015			RHE_RS13740											RHE_RS15910				RHE_RS25165
								RHE_RS19020			RHE_RS13745											RHE_RS15925				RHE_RS25180
								RHE_RS19030			RHE_RS13805											RHE_RS15925				RHE_RS25205
								RHE_RS19035			RHE_RS13815				cluster_191							RHE_RS15970				RHE_RS25240
cluster_164								RHE_RS19050			RHE_RS13820				RHE_RS00855	RHE_RS00855						RHE_RS15995				RHE_RS25335
RHE_RS27930	RHE_RS27930							RHE_RS19180			RHE_RS13915				RHE_RS19335							RHE_RS16030				RHE_RS25440
RHE_RS26765	RHE_RS26765							RHE_RS19190			RHE_RS13960				RHE_RS00850							RHE_RS16035				RHE_RS25465
RHE_RS28420								RHE_RS19205			RHE_RS13975				RHE_RS29830							RHE_RS16040				RHE_RS25565
RHE_RS28425								RHE_RS19235			RHE_RS13980				RHE_RS28160	RHE_RS28160						RHE_RS16040				RHE_RS25585
								RHE_RS19250			RHE_RS14020											RHE_RS16100				RHE_RS25640
								RHE_RS19265			RHE_RS14040											RHE_RS16110				RHE_RS25695
								RHE_RS19270			RHE_RS14050											RHE_RS16110				RHE_RS25720
cluster_167								RHE_RS19275			RHE_RS14165				cluster_192							RHE_RS16120				RHE_RS25740
RHE_RS19905								RHE_RS19300			RHE_RS14215				RHE_RS13430							RHE_RS16120				RHE_RS25775
RHE_RS06685								RHE_RS19305			RHE_RS14275				RHE_RS05000	RHE_RS05000						RHE_RS16120				RHE_RS25795
RHE_RS11340	RHE_RS11340							RHE_RS19330			RHE_RS14315											RHE_RS16135				RHE_RS25800
RHE_RS02560								RHE_RS19375			RHE_RS14325											RHE_RS16205				RHE_RS25805
								RHE_RS19390			RHE_RS14375											RHE_RS16205				RHE_RS25870
								RHE_RS19405			RHE_RS14390				cluster_203							RHE_RS16205				RHE_RS25890
								RHE_RS19425			RHE_RS14475				RHE_RS01720	RHE_RS01720						RHE_RS16210				RHE_RS25950
cluster_168								RHE_RS19440			RHE_RS14490				RHE_RS26635	RHE_RS26635						RHE_RS16230				RHE_RS25965
RHE_RS05820								RHE_RS19450			RHE_RS14515											RHE_RS16230				RHE_RS26100
RHE_RS20405								RHE_RS19505			RHE_RS14540											RHE_RS16260				RHE_RS26110
RHE_RS26610								RHE_RS19510			RHE_RS14615											RHE_RS16260				RHE_RS26150
RHE_RS12925								RHE_RS19540			RHE_RS14640				cluster_205							RHE_RS16330				RHE_RS26195
RHE_RS27920	RHE_RS27920							RHE_RS19545			RHE_RS14645				RHE_RS00730							RHE_RS16330				RHE_RS26275
RHE_RS27915								RHE_RS19590			RHE_RS14685				RHE_RS12090							RHE_RS16340				RHE_RS26295
RHE_RS04885								RHE_RS19595			RHE_RS14695				RHE_RS03430	RHE_RS03430						RHE_RS16415				RHE_RS26330
RHE_RS02355	RHE_RS02355							RHE_RS19670			RHE_RS14710				RHE_RS24570							RHE_RS16415				RHE_RS26350
RHE_RS05815	RHE_RS05815							RHE_RS19695			RHE_RS14720				RHE_RS03645							RHE_RS16420				RHE_RS26515
								RHE_RS19700			RHE_RS14740				RHE_RS29800							RHE_RS16425				RHE_RS26605
								RHE_RS19710			RHE_RS14755											RHE_RS16435				RHE_RS26640
								RHE_RS19725			RHE_RS14820											RHE_RS16475				RHE_RS26750
cluster_172								RHE_RS19745			RHE_RS14830											RHE_RS16510				RHE_RS26805
RHE_RS26440								RHE_RS19750			RHE_RS14885				cluster_207							RHE_RS16510				RHE_RS26860
RHE_RS25595	RHE_RS25595							RHE_RS19765			RHE_RS14965				RHE_RS10425	RHE_RS10425						RHE_RS16510				RHE_RS26870
RHE_RS23570								RHE_RS19835			RHE_RS14985				RHE_RS20595	RHE_RS20595						RHE_RS16545				RHE_RS26900
RHE_RS09025	RHE_RS09025							RHE_RS19840			RHE_RS15015				RHE_RS10420							RHE_RS16555				RHE_RS27075
RHE_RS09020								RHE_RS19890			RHE_RS15025											RHE_RS16590				RHE_RS27165
RHE_RS29335	RHE_RS29335							RHE_RS19905			RHE_RS15110											RHE_RS16590				RHE_RS27170
RHE_RS26435								RHE_RS19935			RHE_RS15125											RHE_RS16610				RHE_RS27180
RHE_RS26945								RHE_RS19965			RHE_RS15165				cluster_208							RHE_RS16650				RHE_RS27270
								RHE_RS19970			RHE_RS15170				RHE_RS23110	RHE_RS23110						RHE_RS16650				RHE_RS27305
								RHE_RS20015			RHE_RS15185				RHE_RS23105							RHE_RS16670				RHE_RS27315
								RHE_RS20020			RHE_RS15190											RHE_RS16740				RHE_RS27340
cluster_175								RHE_RS20060			RHE_RS15195											RHE_RS16740				RHE_RS27360
RHE_RS27930	RHE_RS27930							RHE_RS20070			RHE_RS15200											RHE_RS16760				RHE_RS27455
RHE_RS27935	RHE_RS27935							RHE_RS20095			RHE_RS15215				cluster_209							RHE_RS16760				RHE_RS27465
								RHE_RS20110			RHE_RS15305				RHE_RS02400	RHE_RS02400						RHE_RS16765				RHE_RS27490
								RHE_RS20140			RHE_RS15360				RHE_RS02395							RHE_RS16785				RHE_RS27580
								RHE_RS20150			RHE_RS15375				RHE_RS20060	RHE_RS20060						RHE_RS16800				RHE_RS27605
cluster_176								RHE_RS20175			RHE_RS15385											RHE_RS16800				RHE_RS27715
RHE_RS04065	RHE_RS04065							RHE_RS20255			RHE_RS15415											RHE_RS16800				RHE_RS27730
RHE_RS04070								RHE_RS20280			RHE_RS15430											RHE_RS16815				RHE_RS27815
								RHE_RS20285			RHE_RS15450				cluster_211							RHE_RS16815				RHE_RS27880
								RHE_RS20295			RHE_RS15500				RHE_RS10960	RHE_RS10960						RHE_RS16825				RHE_RS27975
								RHE_RS20315			RHE_RS15515				RHE_RS02135							RHE_RS16825				RHE_RS28165
cluster_177								RHE_RS20320			RHE_RS15560				RHE_RS22960							RHE_RS16825				RHE_RS28170
RHE_RS28005								RHE_RS20380			RHE_RS15570				RHE_RS22955	RHE_RS22955						RHE_RS16825				RHE_RS28190
RHE_RS28010	RHE_RS28010							RHE_RS20390			RHE_RS15585											RHE_RS16880				RHE_RS28245
RHE_RS25790								RHE_RS20395			RHE_RS15605											RHE_RS16895				RHE_RS28380
								RHE_RS20400			RHE_RS15650											RHE_RS16895				RHE_RS28605
								RHE_RS20405			RHE_RS15695				cluster_214							RHE_RS16970				RHE_RS28720
								RHE_RS20450			RHE_RS15725				RHE_RS15925	RHE_RS15925						RHE_RS16970				RHE_RS28730
cluster_182								RHE_RS20455			RHE_RS15775				RHE_RS20810							RHE_RS17040				RHE_RS28785
RHE_RS19015								RHE_RS20460			RHE_RS15785											RHE_RS17050				RHE_RS28840
RHE_RS19020	RHE_RS19020							RHE_RS20470			RHE_RS15815											RHE_RS17050				RHE_RS28870
								RHE_RS20485			RHE_RS15835											RHE_RS17090				RHE_RS28880
								RHE_RS20490			RHE_RS15875				cluster_218							RHE_RS17105				RHE_RS28895
								RHE_RS20500			RHE_RS15885				RHE_RS25180							RHE_RS17105				RHE_RS29120
cluster_183								RHE_RS20530			RHE_RS15900				RHE_RS25185	RHE_RS25185						RHE_RS17105				RHE_RS29165
RHE_RS07685	RHE_RS07685							RHE_RS20540			RHE_RS15905											RHE_RS17135				RHE_RS29175
RHE_RS17050	RHE_RS17050							RHE_RS20550			RHE_RS15950											RHE_RS17135				RHE_RS29190
RHE_RS17660								RHE_RS20560			RHE_RS15960											RHE_RS17145				RHE_RS29240
RHE_RS04510								RHE_RS20575			RHE_RS15965				cluster_219							RHE_RS17145				RHE_RS29255
								RHE_RS20580			RHE_RS15980				RHE_RS21205	RHE_RS21205						RHE_RS17145				RHE_RS29265
								RHE_RS20585			RHE_RS16115				RHE_RS21210							RHE_RS17145				RHE_RS29270
								RHE_RS20595			RHE_RS16180											RHE_RS17170				RHE_RS29390
cluster_185								RHE_RS20610			RHE_RS16185											RHE_RS17170				RHE_RS29445
RHE_RS18970	RHE_RS18970							RHE_RS20625			RHE_RS16195											RHE_RS17175				RHE_RS29575
RHE_RS08785	RHE_RS08785							RHE_RS20655			RHE_RS16200				cluster_224							RHE_RS17175				RHE_RS29615
RHE_RS23055	RHE_RS23055							RHE_RS20690			RHE_RS16220				RHE_RS27580							RHE_RS17175				RHE_RS29780
								RHE_RS20695			RHE_RS16235				RHE_RS14605	RHE_RS14605						RHE_RS17180				RHE_RS29795
								RHE_RS20710			RHE_RS16325											RHE_RS17180				RHE_RS29800
								RHE_RS20715			RHE_RS16345											RHE_RS17200				RHE_RS29820
cluster_186								RHE_RS20725			RHE_RS16350											RHE_RS17200				RHE_RS29825
RHE_RS19840								RHE_RS20735			RHE_RS16480				cluster_225							RHE_RS17205				RHE_RS29830
RHE_RS03580								RHE_RS20755			RHE_RS16530				RHE_RS10885							RHE_RS17205				RHE_RS29845
RHE_RS08025	RHE_RS08025							RHE_RS20765			RHE_RS16565				RHE_RS10890	RHE_RS10890						RHE_RS17210				RHE_RS29990
RHE_RS17030								RHE_RS20770			RHE_RS16615				RHE_RS03610	RHE_RS03610						RHE_RS17240				RHE_RS30040
RHE_RS19835								RHE_RS20775			RHE_RS16660											RHE_RS17240				RHE_RS30055
RHE_RS14475								RHE_RS20790			RHE_RS16675											RHE_RS17260				RHE_RS30080
								RHE_RS20825			RHE_RS16700											RHE_RS17320				RHE_RS30305
								RHE_RS20895			RHE_RS16735				cluster_226							RHE_RS17330				RHE_RS30465
								RHE_RS20930			RHE_RS16755				RHE_RS03515	RHE_RS03515						RHE_RS17330				RHE_RS30475
cluster_192								RHE_RS20960			RHE_RS16870				RHE_RS30630							RHE_RS17400				RHE_RS30500
RHE_RS19405								RHE_RS21005			RHE_RS16935				RHE_RS27525	RHE_RS27525						RHE_RS17430				RHE_RS30505
RHE_RS03450								RHE_RS21030			RHE_RS16945											RHE_RS17450				RHE_RS30520
RHE_RS08920	RHE_RS08920							RHE_RS21035			RHE_RS17010											RHE_RS17450				RHE_RS30525
RHE_RS08915								RHE_RS21040			RHE_RS17020											RHE_RS17515				RHE_RS30530
RHE_RS16340	RHE_RS16340							RHE_RS21050			RHE_RS17030				cluster_227							RHE_RS17595				RHE_RS30545
RHE_RS15305								RHE_RS21075			RHE_RS17045				RHE_RS01840							RHE_RS17645				RHE_RS30550
RHE_RS16345								RHE_RS21080			RHE_RS17060				RHE_RS03610	RHE_RS03610						RHE_RS17645				RHE_RS30630
								RHE_RS21085			RHE_RS17085				RHE_RS09670							RHE_RS17645				RHE_RS30635
								RHE_RS21130			RHE_RS17095				RHE_RS19750	RHE_RS19750						RHE_RS17760				RHE_RS30675
								RHE_RS21205			RHE_RS17115				RHE_RS22030	RHE_RS22030						RHE_RS17760				RHE_RS30715
cluster_197								RHE_RS21225			RHE_RS17140				RHE_RS03170							RHE_RS17805				RHE_RS30740
RHE_RS06880								RHE_RS21275			RHE_RS17190				RHE_RS03175	RHE_RS03175						RHE_RS17815				RHE_RS30775
RHE_RS16220								RHE_RS21355			RHE_RS17195											RHE_RS17830				RHE_RS31005
RHE_RS12060	RHE_RS12060							RHE_RS21400			RHE_RS17405											RHE_RS17830				RHE_RS31055
RHE_RS06875	RHE_RS06875							RHE_RS21415			RHE_RS17565											RHE_RS17835				RHE_RS31095
								RHE_RS21900			RHE_RS17605				cluster_228							RHE_RS17835				RHE_RS31100
								RHE_RS21915			RHE_RS17640				RHE_RS30475							RHE_RS17840				RHE_RS31105
								RHE_RS21975			RHE_RS17660				RHE_RS04040							RHE_RS17840				RHE_RS31110
cluster_199								RHE_RS22020			RHE_RS17670				RHE_RS25970	RHE_RS25970						RHE_RS17845				RHE_RS31115
RHE_RS28885								RHE_RS22030			RHE_RS17710											RHE_RS17940				RHE_RS31120
RHE_RS10265								RHE_RS22055			RHE_RS17720											RHE_RS17940				RHE_RS31950
RHE_RS21035								RHE_RS22060			RHE_RS17765											RHE_RS17955				RHE_RS32060
RHE_RS28890	RHE_RS28890							RHE_RS22090			RHE_RS17770				cluster_229							RHE_RS17955				RHE_RS32120
								RHE_RS22160			RHE_RS17785				RHE_RS13880							RHE_RS18035				RHE_RS32295
								RHE_RS22190			RHE_RS17915				RHE_RS23915	RHE_RS23915						RHE_RS18035				RHE_RS32785
								RHE_RS22210			RHE_RS17930											RHE_RS18035				RHE_RS32825
cluster_211								RHE_RS22570			RHE_RS17935											RHE_RS18085				RHE_RS32880
RHE_RS05510	RHE_RS05510							RHE_RS22605			RHE_RS17980											RHE_RS18085				RHE_RS33115
RHE_RS16825	RHE_RS16825							RHE_RS22735			RHE_RS18010				cluster_232							RHE_RS18135				RHE_RS33160
RHE_RS27920	RHE_RS27920							RHE_RS22765			RHE_RS18015				RHE_RS27460	RHE_RS27460						RHE_RS18135				RHE_RS33365
RHE_RS27915								RHE_RS22770			RHE_RS18065				RHE_RS27465							RHE_RS18135
RHE_RS05820								RHE_RS22830			RHE_RS18090				RHE_RS27455							RHE_RS18135
RHE_RS05815	RHE_RS05815							RHE_RS22845			RHE_RS18100											RHE_RS18140
								RHE_RS22910			RHE_RS18110											RHE_RS18140
								RHE_RS22915			RHE_RS18125											RHE_RS18140
								RHE_RS22940			RHE_RS18145				cluster_233							RHE_RS18170
cluster_215								RHE_RS22955			RHE_RS18160				RHE_RS17050	RHE_RS17050						RHE_RS18175
RHE_RS17050	RHE_RS17050							RHE_RS23015			RHE_RS18180				RHE_RS33160							RHE_RS18175
RHE_RS17045								RHE_RS23055			RHE_RS18190				RHE_RS14500							RHE_RS18235
RHE_RS05945	RHE_RS05945							RHE_RS23065			RHE_RS18225				RHE_RS11905							RHE_RS18235
RHE_RS04590								RHE_RS23080			RHE_RS18295				RHE_RS03430	RHE_RS03430						RHE_RS18240
RHE_RS05950								RHE_RS23130			RHE_RS18325				RHE_RS21540							RHE_RS18240
RHE_RS11950								RHE_RS23165			RHE_RS18350				RHE_RS15610							RHE_RS18250
RHE_RS18015								RHE_RS23180			RHE_RS18380				RHE_RS33115							RHE_RS18250
RHE_RS11955								RHE_RS23185			RHE_RS18475				RHE_RS11625							RHE_RS18340
RHE_RS18010								RHE_RS23190			RHE_RS18480				RHE_RS12285							RHE_RS18340
RHE_RS20150								RHE_RS23225			RHE_RS18505				RHE_RS16895							RHE_RS18340
								RHE_RS23325			RHE_RS18535				RHE_RS07115							RHE_RS18340
								RHE_RS23350			RHE_RS18580				RHE_RS03275	RHE_RS03275						RHE_RS18340
								RHE_RS23365			RHE_RS18590				RHE_RS06635							RHE_RS18365
cluster_216								RHE_RS23370			RHE_RS18615				RHE_RS15090	RHE_RS15090						RHE_RS18365
RHE_RS24755	RHE_RS24755							RHE_RS23380			RHE_RS18655				RHE_RS14410							RHE_RS18365
RHE_RS24760	RHE_RS24760							RHE_RS23385			RHE_RS18675											RHE_RS18370
								RHE_RS23415			RHE_RS18695											RHE_RS18370
								RHE_RS23445			RHE_RS18705											RHE_RS18370
								RHE_RS23450			RHE_RS18715				cluster_238							RHE_RS18455
cluster_217								RHE_RS23465			RHE_RS18745				RHE_RS02290							RHE_RS18455
RHE_RS10960	RHE_RS10960							RHE_RS23470			RHE_RS18845				RHE_RS10640	RHE_RS10640						RHE_RS18455
RHE_RS14875	RHE_RS14875							RHE_RS23500			RHE_RS18860											RHE_RS18525
RHE_RS28655								RHE_RS23520			RHE_RS18895											RHE_RS18525
RHE_RS06015	RHE_RS06015							RHE_RS23535			RHE_RS18905											RHE_RS18560
RHE_RS29975	RHE_RS29975							RHE_RS23540			RHE_RS18930				cluster_239							RHE_RS18560
RHE_RS24620	RHE_RS24620							RHE_RS23550			RHE_RS18935				RHE_RS12930							RHE_RS18650
								RHE_RS23555			RHE_RS18940				RHE_RS28010	RHE_RS28010						RHE_RS18665
								RHE_RS23570			RHE_RS18990											RHE_RS18680
								RHE_RS23585			RHE_RS19015											RHE_RS18685
cluster_218								RHE_RS23630			RHE_RS19035											RHE_RS18685
RHE_RS19305								RHE_RS23635			RHE_RS19050				cluster_240							RHE_RS18690
RHE_RS02340	RHE_RS02340							RHE_RS23665			RHE_RS19180				RHE_RS08145							RHE_RS18710
RHE_RS19300	RHE_RS19300							RHE_RS23695			RHE_RS19190				RHE_RS28020	RHE_RS28020						RHE_RS18710
								RHE_RS23770			RHE_RS19205											RHE_RS18760
								RHE_RS23775			RHE_RS19235											RHE_RS18760
								RHE_RS23835			RHE_RS19250											RHE_RS18760
cluster_219								RHE_RS23880			RHE_RS19265				cluster_242							RHE_RS18760
RHE_RS19695	RHE_RS19695							RHE_RS23885			RHE_RS19270				RHE_RS06030							RHE_RS18765
RHE_RS24565								RHE_RS23935			RHE_RS19275				RHE_RS06025	RHE_RS06025						RHE_RS18795
RHE_RS19700								RHE_RS23945			RHE_RS19305											RHE_RS18795
RHE_RS01675								RHE_RS23955			RHE_RS19330											RHE_RS18835
								RHE_RS23965			RHE_RS19375											RHE_RS18840
								RHE_RS24075			RHE_RS19390				cluster_243							RHE_RS18865
								RHE_RS24090			RHE_RS19405				RHE_RS27340							RHE_RS18865
cluster_221								RHE_RS24095			RHE_RS19440				RHE_RS25185	RHE_RS25185						RHE_RS18900
RHE_RS15215								RHE_RS24105			RHE_RS19450				RHE_RS25180							RHE_RS18900
RHE_RS15210	RHE_RS15210							RHE_RS24110			RHE_RS19505				RHE_RS28450	RHE_RS28450						RHE_RS18970
								RHE_RS24230			RHE_RS19510											RHE_RS19020
								RHE_RS24270			RHE_RS19540											RHE_RS19030
								RHE_RS24330			RHE_RS19590											RHE_RS19045
cluster_226								RHE_RS24350			RHE_RS19595				cluster_244							RHE_RS19065
RHE_RS27930	RHE_RS27930							RHE_RS24370			RHE_RS19700				RHE_RS13770	RHE_RS13770						RHE_RS19065
RHE_RS27935	RHE_RS27935							RHE_RS24400			RHE_RS19710				RHE_RS13775							RHE_RS19100
RHE_RS00045								RHE_RS24445			RHE_RS19725											RHE_RS19295
								RHE_RS24455			RHE_RS19765											RHE_RS19300
								RHE_RS24475			RHE_RS19835											RHE_RS19300
								RHE_RS24480			RHE_RS19840				cluster_246							RHE_RS19335
cluster_227								RHE_RS24505			RHE_RS19890				RHE_RS10425	RHE_RS10425						RHE_RS19335
RHE_RS03615								RHE_RS24540			RHE_RS19905				RHE_RS10420							RHE_RS19335
RHE_RS02695								RHE_RS24565			RHE_RS19935											RHE_RS19335
RHE_RS00995								RHE_RS24620			RHE_RS19965											RHE_RS19345
RHE_RS25290	RHE_RS25290							RHE_RS24655			RHE_RS19970											RHE_RS19360
RHE_RS09875								RHE_RS24725			RHE_RS20015				cluster_249							RHE_RS19425
RHE_RS09790								RHE_RS24735			RHE_RS20020				RHE_RS30310	RHE_RS30310						RHE_RS19485
RHE_RS09690								RHE_RS24755			RHE_RS20070				RHE_RS08025	RHE_RS08025						RHE_RS19500
RHE_RS07590								RHE_RS24760			RHE_RS20095				RHE_RS15995	RHE_RS15995						RHE_RS19545
RHE_RS12355								RHE_RS24850			RHE_RS20140				RHE_RS23775	RHE_RS23775						RHE_RS19670
RHE_RS21415								RHE_RS24890			RHE_RS20150				RHE_RS30305							RHE_RS19690
								RHE_RS24980			RHE_RS20175											RHE_RS19690
								RHE_RS25040			RHE_RS20255											RHE_RS19695
								RHE_RS25060			RHE_RS20280											RHE_RS19745
cluster_229								RHE_RS25065			RHE_RS20295				cluster_250							RHE_RS19745
RHE_RS25560	RHE_RS25560							RHE_RS25150			RHE_RS20315				RHE_RS26680	RHE_RS26680						RHE_RS19745
RHE_RS32710								RHE_RS25185			RHE_RS20320				RHE_RS07105	RHE_RS07105						RHE_RS19750
								RHE_RS25250			RHE_RS20380											RHE_RS19750
								RHE_RS25290			RHE_RS20390											RHE_RS19750
								RHE_RS25320			RHE_RS20395											RHE_RS19830
cluster_234								RHE_RS25370			RHE_RS20400				cluster_261							RHE_RS19850
RHE_RS14710								RHE_RS25445			RHE_RS20405				RHE_RS16825	RHE_RS16825						RHE_RS20045
RHE_RS04535								RHE_RS25455			RHE_RS20450				RHE_RS28880							RHE_RS20060
RHE_RS19205								RHE_RS25500			RHE_RS20455				RHE_RS10400							RHE_RS20060
RHE_RS11615								RHE_RS25540			RHE_RS20470				RHE_RS16040							RHE_RS20060
RHE_RS15785								RHE_RS25545			RHE_RS20485				RHE_RS00095							RHE_RS20080
RHE_RS08085								RHE_RS25560			RHE_RS20500				RHE_RS18250							RHE_RS20110
RHE_RS26355	RHE_RS26355							RHE_RS25595			RHE_RS20530											RHE_RS20110
RHE_RS17785								RHE_RS25605			RHE_RS20540											RHE_RS20110
RHE_RS10265								RHE_RS25630			RHE_RS20550											RHE_RS20110
RHE_RS09560								RHE_RS25725			RHE_RS20560				cluster_263							RHE_RS20110
								RHE_RS25790			RHE_RS20585				RHE_RS30310	RHE_RS30310						RHE_RS20285
								RHE_RS25820			RHE_RS20610				RHE_RS30305							RHE_RS20285
								RHE_RS25835			RHE_RS20655											RHE_RS20325
cluster_236								RHE_RS25840			RHE_RS20690											RHE_RS20460
RHE_RS08385								RHE_RS25855			RHE_RS20695											RHE_RS20460
RHE_RS15405	RHE_RS15405							RHE_RS25865			RHE_RS20715				cluster_265							RHE_RS20460
RHE_RS06565								RHE_RS25905			RHE_RS20725				RHE_RS12120							RHE_RS20460
RHE_RS18225								RHE_RS25970			RHE_RS20735				RHE_RS25040	RHE_RS25040						RHE_RS20490
RHE_RS13975								RHE_RS26000			RHE_RS20755				RHE_RS04030	RHE_RS04030						RHE_RS20575
								RHE_RS26015			RHE_RS20765				RHE_RS12775	RHE_RS12775						RHE_RS20575
								RHE_RS26030			RHE_RS20770				RHE_RS25035							RHE_RS20580
								RHE_RS26040			RHE_RS20775											RHE_RS20580
cluster_237								RHE_RS26045			RHE_RS20790											RHE_RS20595
RHE_RS03205								RHE_RS26050			RHE_RS20895											RHE_RS20625
RHE_RS02120								RHE_RS26070			RHE_RS20930				cluster_268							RHE_RS20625
RHE_RS08685								RHE_RS26090			RHE_RS20960				RHE_RS14145							RHE_RS20625
RHE_RS13740								RHE_RS26095			RHE_RS21005				RHE_RS27920	RHE_RS27920						RHE_RS20665
RHE_RS03210	RHE_RS03210							RHE_RS26105			RHE_RS21030				RHE_RS05815	RHE_RS05815						RHE_RS20665
RHE_RS00255								RHE_RS26115			RHE_RS21035											RHE_RS20710
								RHE_RS26165			RHE_RS21040											RHE_RS20810
								RHE_RS26210			RHE_RS21050											RHE_RS20825
								RHE_RS26225			RHE_RS21075				cluster_270							RHE_RS20850
cluster_240								RHE_RS26260			RHE_RS21080				RHE_RS10680							RHE_RS20885
RHE_RS13820								RHE_RS26265			RHE_RS21085				RHE_RS28340	RHE_RS28340						RHE_RS20905
RHE_RS03775	RHE_RS03775							RHE_RS26280			RHE_RS21130				RHE_RS19750	RHE_RS19750						RHE_RS20915
RHE_RS24890								RHE_RS26285			RHE_RS21225											RHE_RS20950
RHE_RS12535								RHE_RS26290			RHE_RS21275											RHE_RS20950
RHE_RS09160								RHE_RS26355			RHE_RS21400											RHE_RS21205
RHE_RS07375								RHE_RS26415			RHE_RS21415				cluster_271							RHE_RS21205
RHE_RS06640								RHE_RS26425			RHE_RS21975				RHE_RS22705							RHE_RS21210
RHE_RS13815								RHE_RS26435			RHE_RS22055				RHE_RS15240							RHE_RS21210
RHE_RS16615								RHE_RS26440			RHE_RS22060				RHE_RS17430	RHE_RS17430						RHE_RS21210
								RHE_RS26445			RHE_RS22160											RHE_RS21210
								RHE_RS26465			RHE_RS22210											RHE_RS21310
								RHE_RS26495			RHE_RS22570											RHE_RS21310
cluster_241								RHE_RS26575			RHE_RS22735				cluster_272							RHE_RS21355
RHE_RS11945								RHE_RS26610			RHE_RS22765				RHE_RS24100							RHE_RS21355
RHE_RS14135	RHE_RS14135							RHE_RS26635			RHE_RS22845				RHE_RS30525							RHE_RS21355
								RHE_RS26680			RHE_RS22910				RHE_RS24095	RHE_RS24095						RHE_RS21390
								RHE_RS26695			RHE_RS22915				RHE_RS13090							RHE_RS21445
								RHE_RS26720			RHE_RS22940											RHE_RS21540
cluster_242								RHE_RS26730			RHE_RS23015											RHE_RS21540
RHE_RS13195								RHE_RS26765			RHE_RS23165											RHE_RS21555
RHE_RS13190	RHE_RS13190							RHE_RS26790			RHE_RS23185				cluster_274							RHE_RS21685
								RHE_RS26795			RHE_RS23190				RHE_RS17180							RHE_RS21825
								RHE_RS26800			RHE_RS23225				RHE_RS17175							RHE_RS21830
								RHE_RS26840			RHE_RS23365				RHE_RS13180	RHE_RS13180						RHE_RS21830
cluster_243								RHE_RS26850			RHE_RS23370				RHE_RS13115							RHE_RS21915
RHE_RS17050	RHE_RS17050							RHE_RS26865			RHE_RS23380				RHE_RS23635	RHE_RS23635						RHE_RS21915
RHE_RS00015								RHE_RS26875			RHE_RS23385				RHE_RS03775	RHE_RS03775						RHE_RS21915
RHE_RS03430	RHE_RS03430							RHE_RS26890			RHE_RS23415				RHE_RS15135							RHE_RS22015
RHE_RS15605								RHE_RS26920			RHE_RS23445				RHE_RS18035	RHE_RS18035						RHE_RS22020
RHE_RS00155								RHE_RS26945			RHE_RS23450				RHE_RS02715	RHE_RS02715						RHE_RS22030
RHE_RS21080								RHE_RS26950			RHE_RS23500				RHE_RS25950							RHE_RS22045
RHE_RS11185								RHE_RS27050			RHE_RS23535				RHE_RS23640							RHE_RS22050
RHE_RS15430								RHE_RS27070			RHE_RS23550				RHE_RS14395							RHE_RS22090
RHE_RS07300								RHE_RS27150			RHE_RS23570											RHE_RS22090
RHE_RS08320								RHE_RS27185			RHE_RS23585											RHE_RS22145
RHE_RS08300								RHE_RS27195			RHE_RS23630											RHE_RS22145
RHE_RS18295								RHE_RS27240			RHE_RS23770				cluster_277							RHE_RS22155
RHE_RS08430								RHE_RS27280			RHE_RS23880				RHE_RS29780							RHE_RS22155
RHE_RS14490								RHE_RS27310			RHE_RS23935				RHE_RS28890	RHE_RS28890						RHE_RS22190
RHE_RS03275	RHE_RS03275							RHE_RS27415			RHE_RS23955											RHE_RS22190
RHE_RS21975								RHE_RS27460			RHE_RS23965											RHE_RS22200
RHE_RS11190								RHE_RS27470			RHE_RS24075											RHE_RS22200
RHE_RS14540								RHE_RS27520			RHE_RS24105				cluster_283							RHE_RS22235
RHE_RS20560								RHE_RS27525			RHE_RS24230				RHE_RS02130							RHE_RS22235
RHE_RS07305								RHE_RS27555			RHE_RS24270				RHE_RS17050	RHE_RS17050						RHE_RS22245
RHE_RS00895								RHE_RS27560			RHE_RS24330				RHE_RS05945	RHE_RS05945						RHE_RS22245
RHE_RS07330								RHE_RS27570			RHE_RS24370											RHE_RS22245
RHE_RS00525								RHE_RS27600			RHE_RS24400											RHE_RS22245
RHE_RS04100								RHE_RS27645			RHE_RS24445											RHE_RS22260
RHE_RS07275								RHE_RS27650			RHE_RS24455				cluster_286							RHE_RS22260
								RHE_RS27660			RHE_RS24480				RHE_RS24100							RHE_RS22260
								RHE_RS27690			RHE_RS24505				RHE_RS24095	RHE_RS24095						RHE_RS22395
								RHE_RS27745			RHE_RS24565											RHE_RS22460
cluster_244								RHE_RS27750			RHE_RS24655											RHE_RS22560
RHE_RS15890	RHE_RS15890							RHE_RS27810			RHE_RS24890											RHE_RS22600
RHE_RS12990	RHE_RS12990							RHE_RS27845			RHE_RS25065				cluster_288							RHE_RS22600
RHE_RS15885								RHE_RS27875			RHE_RS25150				RHE_RS06215	RHE_RS06215						RHE_RS22605
RHE_RS06015	RHE_RS06015							RHE_RS27915			RHE_RS25250				RHE_RS02385							RHE_RS22605
								RHE_RS27920			RHE_RS25320				RHE_RS11295							RHE_RS22610
								RHE_RS27925			RHE_RS25370				RHE_RS18370							RHE_RS22620
								RHE_RS27930			RHE_RS25445				RHE_RS05465							RHE_RS22620
cluster_246								RHE_RS27935			RHE_RS25500											RHE_RS22625
RHE_RS23470	RHE_RS23470							RHE_RS27970			RHE_RS25545											RHE_RS22630
RHE_RS15885								RHE_RS28005			RHE_RS25630											RHE_RS22640
								RHE_RS28010			RHE_RS25790				cluster_292							RHE_RS22640
								RHE_RS28020			RHE_RS25820				RHE_RS14860							RHE_RS22650
								RHE_RS28025			RHE_RS25855				RHE_RS02825							RHE_RS22650
cluster_248								RHE_RS28030			RHE_RS25865				RHE_RS02800							RHE_RS22650
RHE_RS14215								RHE_RS28045			RHE_RS26030				RHE_RS14750							RHE_RS22650
RHE_RS14210	RHE_RS14210							RHE_RS28070			RHE_RS26045				RHE_RS18900	RHE_RS18900						RHE_RS22705
								RHE_RS28140			RHE_RS26050				RHE_RS14810							RHE_RS22705
								RHE_RS28220			RHE_RS26090				RHE_RS21445							RHE_RS22710
								RHE_RS28225			RHE_RS26095				RHE_RS22650							RHE_RS22740
cluster_253								RHE_RS28305			RHE_RS26105				RHE_RS26330							RHE_RS22770
RHE_RS25855								RHE_RS28340			RHE_RS26165				RHE_RS22395							RHE_RS22770
RHE_RS20775								RHE_RS28350			RHE_RS26210				RHE_RS28380							RHE_RS22790
RHE_RS01250								RHE_RS28370			RHE_RS26225				RHE_RS29390							RHE_RS22790
RHE_RS10975								RHE_RS28420			RHE_RS26260				RHE_RS05965							RHE_RS22795
RHE_RS02810								RHE_RS28425			RHE_RS26265											RHE_RS22830
RHE_RS18475								RHE_RS28445			RHE_RS26285											RHE_RS22830
RHE_RS31670								RHE_RS28450			RHE_RS26415											RHE_RS22955
RHE_RS16565								RHE_RS28455			RHE_RS26425				cluster_294							RHE_RS22955
RHE_RS26920								RHE_RS28510			RHE_RS26435				RHE_RS05000	RHE_RS05000						RHE_RS22960
RHE_RS18760	RHE_RS18760							RHE_RS28545			RHE_RS26440				RHE_RS04995							RHE_RS23020
RHE_RS20380								RHE_RS28550			RHE_RS26445											RHE_RS23050
RHE_RS18745								RHE_RS28555			RHE_RS26575											RHE_RS23050
RHE_RS25250								RHE_RS28625			RHE_RS26610											RHE_RS23050
RHE_RS09325								RHE_RS28650			RHE_RS26730				cluster_297							RHE_RS23055
								RHE_RS28655			RHE_RS26850				RHE_RS18340	RHE_RS18340						RHE_RS23055
								RHE_RS28665			RHE_RS26865				RHE_RS25290	RHE_RS25290						RHE_RS23055
								RHE_RS28695			RHE_RS26890											RHE_RS23065
cluster_256								RHE_RS28710			RHE_RS26920											RHE_RS23080
RHE_RS02765	RHE_RS02765							RHE_RS28725			RHE_RS26945											RHE_RS23080
RHE_RS02770								RHE_RS28770			RHE_RS26950				cluster_299							RHE_RS23105
RHE_RS14210	RHE_RS14210							RHE_RS28775			RHE_RS27070				RHE_RS14875	RHE_RS14875						RHE_RS23110
RHE_RS14185	RHE_RS14185							RHE_RS28780			RHE_RS27150				RHE_RS14870							RHE_RS23130
								RHE_RS28850			RHE_RS27520				RHE_RS30525							RHE_RS23130
								RHE_RS28855			RHE_RS27555				RHE_RS15870							RHE_RS23180
								RHE_RS28865			RHE_RS27650				RHE_RS27280	RHE_RS27280						RHE_RS23180
cluster_260								RHE_RS28885			RHE_RS27660				RHE_RS10410							RHE_RS23195
RHE_RS10550								RHE_RS28890			RHE_RS27690				RHE_RS08925	RHE_RS08925						RHE_RS23240
RHE_RS10545	RHE_RS10545							RHE_RS28950			RHE_RS27745				RHE_RS09115							RHE_RS23310
								RHE_RS28975			RHE_RS27810											RHE_RS23325
								RHE_RS29045			RHE_RS27875											RHE_RS23350
								RHE_RS29075			RHE_RS27915											RHE_RS23360
cluster_262								RHE_RS29080			RHE_RS27970				cluster_301							RHE_RS23360
RHE_RS01720	RHE_RS01720							RHE_RS29085			RHE_RS28005				RHE_RS25585							RHE_RS23435
RHE_RS10760								RHE_RS29090			RHE_RS28025				RHE_RS14700							RHE_RS23470
								RHE_RS29125			RHE_RS28030				RHE_RS15040	RHE_RS15040						RHE_RS23520
								RHE_RS29140			RHE_RS28070				RHE_RS22640							RHE_RS23540
								RHE_RS29170			RHE_RS28140				RHE_RS10510	RHE_RS10510						RHE_RS23540
cluster_263								RHE_RS29195			RHE_RS28225				RHE_RS05555							RHE_RS23555
RHE_RS10515								RHE_RS29200			RHE_RS28350				RHE_RS01355							RHE_RS23565
RHE_RS12990	RHE_RS12990							RHE_RS29205			RHE_RS28420				RHE_RS20915							RHE_RS23565
RHE_RS10510	RHE_RS10510							RHE_RS29335			RHE_RS28425											RHE_RS23565
								RHE_RS29380			RHE_RS28445											RHE_RS23635
								RHE_RS29400			RHE_RS28455											RHE_RS23635
								RHE_RS29450			RHE_RS28550				cluster_303							RHE_RS23635
cluster_264								RHE_RS29495			RHE_RS28650				RHE_RS08770							RHE_RS23635
RHE_RS27150								RHE_RS29525			RHE_RS28655				RHE_RS26515							RHE_RS23640
RHE_RS16760	RHE_RS16760							RHE_RS29535			RHE_RS28770				RHE_RS02600	RHE_RS02600						RHE_RS23640
								RHE_RS29620			RHE_RS28775				RHE_RS13235	RHE_RS13235						RHE_RS23640
								RHE_RS29630			RHE_RS28780				RHE_RS13240							RHE_RS23665
								RHE_RS29775			RHE_RS28850											RHE_RS23680
cluster_265								RHE_RS29840			RHE_RS28865											RHE_RS23690
RHE_RS12035	RHE_RS12035							RHE_RS29945			RHE_RS28885											RHE_RS23735
RHE_RS20015								RHE_RS29975			RHE_RS28950				cluster_304							RHE_RS23775
RHE_RS14985								RHE_RS30005			RHE_RS28975				RHE_RS18240							RHE_RS23775
RHE_RS04190								RHE_RS30095			RHE_RS29045				RHE_RS18235	RHE_RS18235						RHE_RS23775
RHE_RS02675								RHE_RS30225			RHE_RS29085											RHE_RS23835
RHE_RS07075								RHE_RS30285			RHE_RS29090											RHE_RS23835
RHE_RS12025								RHE_RS30310			RHE_RS29125											RHE_RS23840
RHE_RS00495								RHE_RS30350			RHE_RS29140				cluster_308							RHE_RS23840
RHE_RS11145								RHE_RS30470			RHE_RS29170				RHE_RS05415	RHE_RS05415						RHE_RS23865
RHE_RS17115								RHE_RS30570			RHE_RS29380				RHE_RS28785							RHE_RS23885
RHE_RS29085								RHE_RS30745			RHE_RS29450											RHE_RS23890
RHE_RS27645	RHE_RS27645							RHE_RS30785			RHE_RS29495											RHE_RS23915
RHE_RS00155								RHE_RS30790			RHE_RS29525											RHE_RS23920
								RHE_RS30795			RHE_RS29620				cluster_309							RHE_RS23920
								RHE_RS30830			RHE_RS29945				RHE_RS23640							RHE_RS23945
								RHE_RS30890			RHE_RS30005				RHE_RS23635	RHE_RS23635						RHE_RS24010
cluster_266								RHE_RS30900			RHE_RS30225											RHE_RS24065
RHE_RS18065								RHE_RS30975			RHE_RS30350											RHE_RS24090
RHE_RS12170								RHE_RS31225			RHE_RS30785											RHE_RS24090
RHE_RS26695	RHE_RS26695							RHE_RS31305			RHE_RS30795				cluster_311							RHE_RS24095
RHE_RS03995								RHE_RS31500			RHE_RS30830				RHE_RS26350							RHE_RS24095
RHE_RS17090	RHE_RS17090							RHE_RS31670			RHE_RS30890				RHE_RS26355	RHE_RS26355						RHE_RS24095
RHE_RS20470								RHE_RS32370			RHE_RS30900											RHE_RS24095
								RHE_RS32435			RHE_RS30975											RHE_RS24100
								RHE_RS32555			RHE_RS31225											RHE_RS24100
								RHE_RS32675			RHE_RS31305				cluster_312							RHE_RS24100
cluster_270								RHE_RS32710			RHE_RS31670				RHE_RS13835							RHE_RS24100
RHE_RS05065								RHE_RS33140			RHE_RS32710				RHE_RS29975	RHE_RS29975						RHE_RS24110
RHE_RS26210											RHE_RS33140				RHE_RS23050							RHE_RS24110
RHE_RS11765															RHE_RS23055	RHE_RS23055						RHE_RS24140
RHE_RS02485															RHE_RS07235							RHE_RS24140
RHE_RS11865															RHE_RS05855	RHE_RS05855						RHE_RS24190
RHE_RS08675															RHE_RS20710	RHE_RS20710						RHE_RS24195
RHE_RS19765															RHE_RS28895							RHE_RS24245
RHE_RS08660																						RHE_RS24245
RHE_RS03620																						RHE_RS24290
RHE_RS02635																						RHE_RS24290
RHE_RS07380															cluster_314							RHE_RS24300
RHE_RS16135	RHE_RS16135														RHE_RS12200							RHE_RS24320
															RHE_RS05170	RHE_RS05170						RHE_RS24320
															RHE_RS12205	RHE_RS12205						RHE_RS24360
															RHE_RS20460	RHE_RS20460						RHE_RS24360
cluster_278															RHE_RS08980							RHE_RS24425
RHE_RS20930															RHE_RS12345							RHE_RS24425
RHE_RS21205	RHE_RS21205														RHE_RS18250							RHE_RS24425
															RHE_RS05330	RHE_RS05330						RHE_RS24475
																						RHE_RS24490
																						RHE_RS24490
cluster_281																						RHE_RS24540
RHE_RS10425	RHE_RS10425														cluster_315							RHE_RS24545
RHE_RS10735															RHE_RS04155							RHE_RS24570
RHE_RS20550															RHE_RS15590							RHE_RS24615
															RHE_RS25440							RHE_RS24615
															RHE_RS25805							RHE_RS24615
															RHE_RS01775							RHE_RS24620
cluster_284															RHE_RS17200	RHE_RS17200						RHE_RS24620
RHE_RS22020	RHE_RS22020																					RHE_RS24660
RHE_RS18795	RHE_RS18795																					RHE_RS24735
																						RHE_RS24745
															cluster_317							RHE_RS24745
															RHE_RS28895							RHE_RS24755
cluster_286															RHE_RS28900	RHE_RS28900						RHE_RS24755
RHE_RS05855	RHE_RS05855																					RHE_RS24760
RHE_RS09730																						RHE_RS24760
																						RHE_RS24850
															cluster_318							RHE_RS24850
															RHE_RS00185	RHE_RS00185						RHE_RS24860
cluster_287															RHE_RS11905							RHE_RS24975
RHE_RS15925	RHE_RS15925														RHE_RS11900							RHE_RS24980
RHE_RS13345															RHE_RS12930							RHE_RS24980
															RHE_RS14170							RHE_RS25025
															RHE_RS08370							RHE_RS25035
																						RHE_RS25040
cluster_288																						RHE_RS25040
RHE_RS24475	RHE_RS24475																					RHE_RS25040
RHE_RS24480															cluster_321							RHE_RS25040
															RHE_RS10580	RHE_RS10580						RHE_RS25060
															RHE_RS23635	RHE_RS23635						RHE_RS25120
															RHE_RS07835	RHE_RS07835						RHE_RS25120
cluster_292															RHE_RS03645							RHE_RS25165
RHE_RS01925															RHE_RS10420							RHE_RS25165
RHE_RS19750	RHE_RS19750														RHE_RS23640							RHE_RS25170
RHE_RS03175	RHE_RS03175																					RHE_RS25180
RHE_RS22030	RHE_RS22030																					RHE_RS25180
																						RHE_RS25180
															cluster_322							RHE_RS25185
															RHE_RS32825							RHE_RS25185
cluster_293															RHE_RS13340							RHE_RS25185
RHE_RS03970															RHE_RS22045							RHE_RS25205
RHE_RS25970	RHE_RS25970														RHE_RS12975							RHE_RS25240
															RHE_RS32060							RHE_RS25290
															RHE_RS13265							RHE_RS25290
															RHE_RS22610							RHE_RS25290
cluster_295															RHE_RS26635	RHE_RS26635						RHE_RS25335
RHE_RS04570																						RHE_RS25440
RHE_RS04575	RHE_RS04575																					RHE_RS25440
																						RHE_RS25455
															cluster_323							RHE_RS25455
															RHE_RS05980							RHE_RS25455
cluster_299															RHE_RS17180							RHE_RS25465
RHE_RS20755															RHE_RS21915	RHE_RS21915						RHE_RS25465
RHE_RS09595															RHE_RS12765							RHE_RS25465
RHE_RS26950															RHE_RS30475							RHE_RS25465
RHE_RS29200	RHE_RS29200																					RHE_RS25540
RHE_RS11855																						RHE_RS25540
																						RHE_RS25565
															cluster_324							RHE_RS25565
															RHE_RS20850							RHE_RS25580
cluster_302															RHE_RS01030							RHE_RS25585
RHE_RS03205															RHE_RS14920	RHE_RS14920						RHE_RS25585
RHE_RS03210	RHE_RS03210														RHE_RS19745	RHE_RS19745						RHE_RS25595
RHE_RS13000															RHE_RS15350							RHE_RS25595
															RHE_RS12575							RHE_RS25605
															RHE_RS12345							RHE_RS25605
																						RHE_RS25605
cluster_304																						RHE_RS25640
RHE_RS16205	RHE_RS16205																					RHE_RS25640
RHE_RS15925	RHE_RS15925														cluster_325							RHE_RS25695
RHE_RS10640	RHE_RS10640														RHE_RS03720	RHE_RS03720						RHE_RS25695
RHE_RS16200															RHE_RS22630							RHE_RS25695
															RHE_RS22625							RHE_RS25720
																						RHE_RS25725
																						RHE_RS25740
cluster_307																						RHE_RS25775
RHE_RS17020															cluster_326							RHE_RS25795
RHE_RS24095	RHE_RS24095														RHE_RS29780							RHE_RS25800
															RHE_RS13735							RHE_RS25800
															RHE_RS29775	RHE_RS29775						RHE_RS25800
																						RHE_RS25805
cluster_308																						RHE_RS25805
RHE_RS28655																						RHE_RS25805
RHE_RS02045	RHE_RS02045														cluster_330							RHE_RS25835
RHE_RS02055															RHE_RS16510							RHE_RS25835
RHE_RS19190															RHE_RS25725	RHE_RS25725						RHE_RS25870
RHE_RS01005															RHE_RS25720							RHE_RS25890
RHE_RS01855																						RHE_RS25890
																						RHE_RS25890
																						RHE_RS25890
															cluster_332							RHE_RS25905
cluster_310															RHE_RS31950							RHE_RS25905
RHE_RS15695															RHE_RS07420							RHE_RS25950
RHE_RS26680	RHE_RS26680														RHE_RS19335							RHE_RS25965
RHE_RS07105	RHE_RS07105														RHE_RS19750	RHE_RS19750						RHE_RS25970
															RHE_RS22155							RHE_RS25970
															RHE_RS10930							RHE_RS25970
																						RHE_RS25970
cluster_312																						RHE_RS26000
RHE_RS08090																						RHE_RS26000
RHE_RS03430	RHE_RS03430														cluster_333							RHE_RS26015
RHE_RS15415															RHE_RS28725	RHE_RS28725						RHE_RS26040
RHE_RS14820															RHE_RS28720							RHE_RS26040
RHE_RS07070															RHE_RS05560							RHE_RS26070
																						RHE_RS26100
																						RHE_RS26110
																						RHE_RS26110
cluster_313															cluster_339							RHE_RS26110
RHE_RS10745															RHE_RS14860							RHE_RS26115
RHE_RS05790	RHE_RS05790														RHE_RS24300							RHE_RS26115
RHE_RS11820															RHE_RS23195							RHE_RS26115
															RHE_RS00690							RHE_RS26150
															RHE_RS28785							RHE_RS26195
															RHE_RS16425							RHE_RS26235
cluster_316															RHE_RS01095	RHE_RS01095						RHE_RS26275
RHE_RS20490	RHE_RS20490														RHE_RS06280							RHE_RS26280
RHE_RS02765	RHE_RS02765														RHE_RS29175							RHE_RS26295
RHE_RS02770																						RHE_RS26330
																						RHE_RS26350
																						RHE_RS26350
															cluster_340							RHE_RS26350
cluster_318															RHE_RS12620	RHE_RS12620						RHE_RS26350
RHE_RS28850															RHE_RS13970							RHE_RS26355
RHE_RS28855	RHE_RS28855														RHE_RS29975	RHE_RS29975						RHE_RS26355
																						RHE_RS26355
																						RHE_RS26355
																						RHE_RS26495
cluster_321															cluster_341							RHE_RS26515
RHE_RS00275															RHE_RS25800							RHE_RS26605
RHE_RS06405	RHE_RS06405														RHE_RS25565							RHE_RS26605
RHE_RS08455															RHE_RS25580	RHE_RS25580						RHE_RS26635
RHE_RS17305	RHE_RS17305																					RHE_RS26635
																						RHE_RS26635
																						RHE_RS26640
															cluster_344							RHE_RS26680
cluster_322															RHE_RS01350	RHE_RS01350						RHE_RS26680
RHE_RS20405															RHE_RS01345							RHE_RS26695
RHE_RS14885																						RHE_RS26695
RHE_RS13980																						RHE_RS26695
RHE_RS19750	RHE_RS19750																					RHE_RS26720
RHE_RS17765															cluster_345							RHE_RS26750
RHE_RS17770															RHE_RS27185	RHE_RS27185						RHE_RS26765
															RHE_RS18170							RHE_RS26765
															RHE_RS27180							RHE_RS26790
															RHE_RS26040	RHE_RS26040						RHE_RS26790
cluster_323															RHE_RS15870							RHE_RS26790
RHE_RS27660																						RHE_RS26795
RHE_RS03775	RHE_RS03775																					RHE_RS26795
																						RHE_RS26800
															cluster_346							RHE_RS26800
															RHE_RS21205	RHE_RS21205						RHE_RS26800
cluster_329															RHE_RS21210							RHE_RS26805
RHE_RS21050																						RHE_RS26840
RHE_RS26950																						RHE_RS26840
RHE_RS07330																						RHE_RS26860
RHE_RS09255															cluster_347							RHE_RS26860
RHE_RS29450															RHE_RS25180							RHE_RS26870
RHE_RS04485															RHE_RS25185	RHE_RS25185						RHE_RS26875
RHE_RS09445	RHE_RS09445																					RHE_RS26900
RHE_RS07645																						RHE_RS27050
																						RHE_RS27050
															cluster_348							RHE_RS27050
															RHE_RS25775							RHE_RS27075
cluster_330															RHE_RS20885							RHE_RS27165
RHE_RS12030															RHE_RS00580							RHE_RS27170
RHE_RS02780															RHE_RS02710	RHE_RS02710						RHE_RS27170
RHE_RS09500																						RHE_RS27180
RHE_RS07835	RHE_RS07835																					RHE_RS27180
																						RHE_RS27180
															cluster_349							RHE_RS27185
															RHE_RS15970							RHE_RS27185
cluster_332															RHE_RS14700							RHE_RS27185
RHE_RS30745	RHE_RS30745														RHE_RS08125							RHE_RS27185
RHE_RS14645															RHE_RS10485	RHE_RS10485						RHE_RS27195
															RHE_RS10410							RHE_RS27195
															RHE_RS10390							RHE_RS27240
															RHE_RS16610							RHE_RS27240
cluster_333																						RHE_RS27240
RHE_RS04065	RHE_RS04065																					RHE_RS27270
RHE_RS04070																						RHE_RS27280
															cluster_351							RHE_RS27280
															RHE_RS10545	RHE_RS10545						RHE_RS27280
															RHE_RS18340	RHE_RS18340						RHE_RS27280
cluster_334															RHE_RS10445	RHE_RS10445						RHE_RS27305
RHE_RS20285	RHE_RS20285														RHE_RS30530							RHE_RS27305
RHE_RS20280															RHE_RS03915							RHE_RS27310
															RHE_RS26015	RHE_RS26015						RHE_RS27315
																						RHE_RS27340
																						RHE_RS27340
cluster_336																						RHE_RS27360
RHE_RS05255	RHE_RS05255														cluster_352							RHE_RS27360
RHE_RS05260															RHE_RS05940							RHE_RS27360
															RHE_RS13400							RHE_RS27415
															RHE_RS03950							RHE_RS27455
															RHE_RS27280	RHE_RS27280						RHE_RS27455
cluster_337															RHE_RS24245							RHE_RS27460
RHE_RS00765	RHE_RS00765														RHE_RS24615							RHE_RS27460
RHE_RS06235															RHE_RS09115							RHE_RS27460
RHE_RS06240															RHE_RS02135							RHE_RS27460
																						RHE_RS27460
																						RHE_RS27465
																						RHE_RS27465
cluster_340															cluster_357							RHE_RS27465
RHE_RS23880															RHE_RS30500							RHE_RS27465
RHE_RS29840	RHE_RS29840														RHE_RS30715							RHE_RS27470
RHE_RS23885	RHE_RS23885														RHE_RS24850	RHE_RS24850						RHE_RS27470
															RHE_RS30525							RHE_RS27470
																						RHE_RS27490
																						RHE_RS27525
cluster_342																						RHE_RS27525
RHE_RS06215	RHE_RS06215														cluster_359							RHE_RS27570
RHE_RS06705	RHE_RS06705														RHE_RS16825	RHE_RS16825						RHE_RS27580
RHE_RS04835															RHE_RS01930							RHE_RS27580
															RHE_RS14810							RHE_RS27580
															RHE_RS26150							RHE_RS27605
															RHE_RS29390							RHE_RS27645
cluster_343															RHE_RS25870							RHE_RS27645
RHE_RS10960	RHE_RS10960																					RHE_RS27645
RHE_RS11060																						RHE_RS27715
RHE_RS22955	RHE_RS22955																					RHE_RS27715
															cluster_361							RHE_RS27730
															RHE_RS18135	RHE_RS18135						RHE_RS27750
															RHE_RS18140							RHE_RS27815
cluster_345																						RHE_RS27815
RHE_RS01475	RHE_RS01475																					RHE_RS27845
RHE_RS11305																						RHE_RS27880
RHE_RS11475															cluster_363							RHE_RS27880
RHE_RS00765	RHE_RS00765														RHE_RS13810							RHE_RS27920
															RHE_RS14355	RHE_RS14355						RHE_RS27930
															RHE_RS07480	RHE_RS07480						RHE_RS27930
																						RHE_RS27930
cluster_346																						RHE_RS27935
RHE_RS28340	RHE_RS28340																					RHE_RS27935
RHE_RS19750	RHE_RS19750														cluster_365							RHE_RS27975
RHE_RS14325															RHE_RS00195							RHE_RS27975
															RHE_RS07145							RHE_RS28010
															RHE_RS04985							RHE_RS28010
															RHE_RS15480							RHE_RS28010
cluster_349															RHE_RS00690							RHE_RS28020
RHE_RS28140															RHE_RS26860							RHE_RS28020
RHE_RS06345															RHE_RS20580	RHE_RS20580						RHE_RS28020
RHE_RS28770															RHE_RS01340							RHE_RS28160
RHE_RS03000	RHE_RS03000																					RHE_RS28165
																						RHE_RS28165
																						RHE_RS28170
															cluster_367							RHE_RS28190
cluster_352															RHE_RS07685	RHE_RS07685						RHE_RS28245
RHE_RS27185	RHE_RS27185														RHE_RS05945	RHE_RS05945						RHE_RS28305
RHE_RS17145	RHE_RS17145														RHE_RS03645							RHE_RS28305
RHE_RS17140															RHE_RS07055							RHE_RS28305
															RHE_RS24090	RHE_RS24090						RHE_RS28340
															RHE_RS00490							RHE_RS28370
															RHE_RS06635							RHE_RS28370
cluster_353															RHE_RS15090	RHE_RS15090						RHE_RS28380
RHE_RS13750	RHE_RS13750																					RHE_RS28380
RHE_RS17980																						RHE_RS28450
RHE_RS18900	RHE_RS18900																					RHE_RS28450
RHE_RS04100															cluster_368							RHE_RS28510
RHE_RS18895															RHE_RS02230							RHE_RS28510
RHE_RS20960															RHE_RS30305							RHE_RS28555
															RHE_RS12420							RHE_RS28555
															RHE_RS09130	RHE_RS09130						RHE_RS28605
															RHE_RS30310	RHE_RS30310						RHE_RS28605
cluster_354																						RHE_RS28605
RHE_RS15800	RHE_RS15800																					RHE_RS28625
RHE_RS24400																						RHE_RS28695
RHE_RS25040	RHE_RS25040														cluster_372							RHE_RS28710
															RHE_RS30285	RHE_RS30285						RHE_RS28710
															RHE_RS29775	RHE_RS29775						RHE_RS28710
																						RHE_RS28720
cluster_355																						RHE_RS28720
RHE_RS15755	RHE_RS15755																					RHE_RS28720
RHE_RS16670	RHE_RS16670														cluster_374							RHE_RS28725
RHE_RS28890	RHE_RS28890														RHE_RS25795							RHE_RS28725
															RHE_RS10545	RHE_RS10545						RHE_RS28730
															RHE_RS22955	RHE_RS22955						RHE_RS28730
															RHE_RS25800							RHE_RS28730
cluster_359															RHE_RS10425	RHE_RS10425						RHE_RS28785
RHE_RS04720															RHE_RS19545	RHE_RS19545						RHE_RS28785
RHE_RS16825	RHE_RS16825																					RHE_RS28785
RHE_RS26790	RHE_RS26790																					RHE_RS28840
RHE_RS06070																						RHE_RS28870
RHE_RS27810															cluster_375							RHE_RS28880
RHE_RS11280															RHE_RS16205	RHE_RS16205						RHE_RS28890
RHE_RS10735															RHE_RS27460	RHE_RS27460						RHE_RS28890
															RHE_RS06095							RHE_RS28895
															RHE_RS27465							RHE_RS28895
																						RHE_RS28895
cluster_360																						RHE_RS28900
RHE_RS23695	RHE_RS23695																					RHE_RS28900
RHE_RS28550															cluster_377							RHE_RS29075
RHE_RS05255	RHE_RS05255														RHE_RS13215	RHE_RS13215						RHE_RS29120
RHE_RS28555	RHE_RS28555														RHE_RS13220							RHE_RS29120
																						RHE_RS29165
																						RHE_RS29165
																						RHE_RS29175
cluster_361															cluster_380							RHE_RS29175
RHE_RS00185	RHE_RS00185														RHE_RS18680	RHE_RS18680						RHE_RS29190
RHE_RS00190															RHE_RS26800	RHE_RS26800						RHE_RS29195
RHE_RS11060															RHE_RS18140							RHE_RS29195
RHE_RS06560															RHE_RS12765							RHE_RS29195
															RHE_RS18135	RHE_RS18135						RHE_RS29200
																						RHE_RS29200
																						RHE_RS29205
cluster_363																						RHE_RS29240
RHE_RS19305															cluster_383							RHE_RS29255
RHE_RS10545	RHE_RS10545														RHE_RS10375							RHE_RS29265
RHE_RS22955	RHE_RS22955														RHE_RS28730							RHE_RS29270
RHE_RS19300	RHE_RS19300														RHE_RS20285	RHE_RS20285						RHE_RS29335
															RHE_RS18370							RHE_RS29390
															RHE_RS12760							RHE_RS29390
															RHE_RS01410	RHE_RS01410						RHE_RS29390
cluster_366															RHE_RS06025	RHE_RS06025						RHE_RS29400
RHE_RS06655																						RHE_RS29445
RHE_RS00735																						RHE_RS29535
RHE_RS09015	RHE_RS09015																					RHE_RS29535
RHE_RS14885															cluster_385							RHE_RS29575
RHE_RS30790	RHE_RS30790														RHE_RS26350							RHE_RS29615
RHE_RS06050															RHE_RS19300	RHE_RS19300						RHE_RS29630
															RHE_RS03575							RHE_RS29630
															RHE_RS26355	RHE_RS26355						RHE_RS29775
																						RHE_RS29775
cluster_367																						RHE_RS29775
RHE_RS20500																						RHE_RS29780
RHE_RS16700															cluster_387							RHE_RS29780
RHE_RS03720	RHE_RS03720														RHE_RS09465							RHE_RS29795
RHE_RS28865															RHE_RS28895							RHE_RS29800
															RHE_RS28900	RHE_RS28900						RHE_RS29800
															RHE_RS16800	RHE_RS16800						RHE_RS29820
																						RHE_RS29825
cluster_368																						RHE_RS29830
RHE_RS19015																						RHE_RS29830
RHE_RS27050	RHE_RS27050														cluster_389							RHE_RS29835
RHE_RS11465															RHE_RS02645							RHE_RS29835
RHE_RS03485															RHE_RS09265							RHE_RS29840
RHE_RS29125															RHE_RS25240							RHE_RS29845
RHE_RS12350															RHE_RS09715							RHE_RS29975
RHE_RS00575															RHE_RS09225							RHE_RS29975
RHE_RS19020	RHE_RS19020														RHE_RS19335							RHE_RS29975
															RHE_RS12585	RHE_RS12585						RHE_RS29975
															RHE_RS15090	RHE_RS15090						RHE_RS29990
															RHE_RS20575	RHE_RS20575						RHE_RS29990
cluster_371																						RHE_RS29990
RHE_RS33140	RHE_RS33140																					RHE_RS30040
RHE_RS16675																						RHE_RS30055
RHE_RS08550															cluster_390							RHE_RS30080
RHE_RS16670	RHE_RS16670														RHE_RS14675							RHE_RS30095
RHE_RS18505															RHE_RS20110	RHE_RS20110						RHE_RS30285
RHE_RS18745															RHE_RS04645	RHE_RS04645						RHE_RS30285
															RHE_RS08895							RHE_RS30285
															RHE_RS26860							RHE_RS30305
															RHE_RS12325	RHE_RS12325						RHE_RS30305
cluster_372															RHE_RS02420							RHE_RS30305
RHE_RS10580	RHE_RS10580														RHE_RS10365							RHE_RS30305
RHE_RS28780																						RHE_RS30310
RHE_RS06895																						RHE_RS30310
RHE_RS18350																						RHE_RS30310
RHE_RS28305	RHE_RS28305														cluster_394							RHE_RS30310
RHE_RS07835	RHE_RS07835														RHE_RS12920	RHE_RS12920						RHE_RS30465
RHE_RS27240	RHE_RS27240														RHE_RS00280							RHE_RS30470
RHE_RS25060	RHE_RS25060														RHE_RS28370	RHE_RS28370						RHE_RS30475
RHE_RS11305															RHE_RS14485							RHE_RS30475
RHE_RS14875	RHE_RS14875																					RHE_RS30475
RHE_RS07290																						RHE_RS30475
RHE_RS09730																						RHE_RS30500
RHE_RS11385															cluster_396							RHE_RS30500
RHE_RS20540															RHE_RS07115							RHE_RS30505
															RHE_RS19745	RHE_RS19745						RHE_RS30520
															RHE_RS24195							RHE_RS30525
															RHE_RS15700							RHE_RS30525
cluster_375																						RHE_RS30525
RHE_RS09575																						RHE_RS30530
RHE_RS00670																						RHE_RS30530
RHE_RS01630															cluster_397							RHE_RS30545
RHE_RS10485	RHE_RS10485														RHE_RS29990							RHE_RS30550
RHE_RS11085															RHE_RS30055							RHE_RS30550
RHE_RS05450															RHE_RS27845	RHE_RS27845						RHE_RS30570
RHE_RS19375															RHE_RS29975	RHE_RS29975						RHE_RS30570
RHE_RS31500	RHE_RS31500																					RHE_RS30570
																						RHE_RS30630
																						RHE_RS30635
															cluster_402							RHE_RS30675
cluster_377															RHE_RS00730							RHE_RS30715
RHE_RS18895															RHE_RS17040							RHE_RS30740
RHE_RS18900	RHE_RS18900														RHE_RS11960							RHE_RS30745
RHE_RS28020	RHE_RS28020														RHE_RS19295							RHE_RS30745
															RHE_RS18370							RHE_RS30745
															RHE_RS07835	RHE_RS07835						RHE_RS30775
															RHE_RS24360							RHE_RS31005
cluster_380															RHE_RS08145							RHE_RS31055
RHE_RS11525															RHE_RS15700							RHE_RS31055
RHE_RS25455	RHE_RS25455																					RHE_RS31095
RHE_RS03720	RHE_RS03720																					RHE_RS31095
RHE_RS01540																						RHE_RS31100
RHE_RS28950															cluster_403							RHE_RS31105
RHE_RS10800															RHE_RS25605	RHE_RS25605						RHE_RS31110
															RHE_RS05315	RHE_RS05315						RHE_RS31115
															RHE_RS00765	RHE_RS00765						RHE_RS31115
															RHE_RS17835	RHE_RS17835						RHE_RS31120
cluster_386															RHE_RS15700							RHE_RS31500
RHE_RS07760																						RHE_RS31950
RHE_RS14215																						RHE_RS32060
RHE_RS19050																						RHE_RS32120
RHE_RS10510	RHE_RS10510														cluster_405							RHE_RS32295
RHE_RS17935															RHE_RS11690	RHE_RS11690						RHE_RS32370
															RHE_RS30505							RHE_RS32370
															RHE_RS13060	RHE_RS13060						RHE_RS32435
															RHE_RS14160	RHE_RS14160						RHE_RS32435
cluster_387															RHE_RS12775	RHE_RS12775						RHE_RS32555
RHE_RS01430	RHE_RS01430														RHE_RS27165							RHE_RS32675
RHE_RS20690															RHE_RS12340							RHE_RS32675
																						RHE_RS32785
																						RHE_RS32825
																						RHE_RS32880
cluster_389															cluster_408							RHE_RS33115
RHE_RS19840															RHE_RS05415	RHE_RS05415						RHE_RS33140
RHE_RS19835															RHE_RS05420							RHE_RS33140
RHE_RS22160																						RHE_RS33140
RHE_RS06825	RHE_RS06825																					RHE_RS33160
																						RHE_RS33365
															cluster_409
															RHE_RS25465
cluster_393															RHE_RS13235	RHE_RS13235
RHE_RS12350															RHE_RS28605
RHE_RS17305	RHE_RS17305														RHE_RS08370
															RHE_RS04575	RHE_RS04575
cluster_394
RHE_RS02620															cluster_411
RHE_RS18160															RHE_RS05330	RHE_RS05330
RHE_RS19745	RHE_RS19745														RHE_RS20325
RHE_RS04190															RHE_RS20625	RHE_RS20625
															RHE_RS05495	RHE_RS05495
															RHE_RS17760
cluster_396
RHE_RS23080	RHE_RS23080
RHE_RS01735															cluster_417
RHE_RS13235	RHE_RS13235														RHE_RS13295	RHE_RS13295
RHE_RS01740	RHE_RS01740														RHE_RS20080
															RHE_RS28605
cluster_397
RHE_RS10425	RHE_RS10425														cluster_418
RHE_RS14685															RHE_RS04495
RHE_RS07210	RHE_RS07210														RHE_RS05120
RHE_RS15110															RHE_RS20950
															RHE_RS06825	RHE_RS06825
															RHE_RS04550
															RHE_RS02835	RHE_RS02835
cluster_402															RHE_RS08145
RHE_RS18085	RHE_RS18085
RHE_RS18090
															cluster_420
															RHE_RS18455
cluster_404															RHE_RS06620	RHE_RS06620
RHE_RS11860	RHE_RS11860
RHE_RS13695	RHE_RS13695
															cluster_421
															RHE_RS18340	RHE_RS18340
cluster_406															RHE_RS13735
RHE_RS16115															RHE_RS06265
RHE_RS16120	RHE_RS16120														RHE_RS06730
RHE_RS20450															RHE_RS13635
cluster_407															cluster_422
RHE_RS12580															RHE_RS18455
RHE_RS26415															RHE_RS12035	RHE_RS12035
RHE_RS12585	RHE_RS12585														RHE_RS19830
															RHE_RS13845
cluster_409
RHE_RS15800	RHE_RS15800														cluster_423
RHE_RS28775															RHE_RS21915	RHE_RS21915
RHE_RS00760															RHE_RS24545
															RHE_RS22740
															RHE_RS10775
cluster_410
RHE_RS03635
RHE_RS12940	RHE_RS12940														cluster_429
RHE_RS17640															RHE_RS12575
RHE_RS00550															RHE_RS24475	RHE_RS24475
RHE_RS20140															RHE_RS15590
															RHE_RS02490
cluster_414
RHE_RS25605	RHE_RS25605														cluster_432
RHE_RS19965															RHE_RS26875	RHE_RS26875
RHE_RS19970															RHE_RS25040	RHE_RS25040
															RHE_RS16970
															RHE_RS03150
cluster_417
RHE_RS21005
RHE_RS27195	RHE_RS27195														cluster_433
RHE_RS19450															RHE_RS13735
															RHE_RS15240
															RHE_RS25890
															RHE_RS11445
cluster_420															RHE_RS03275	RHE_RS03275
RHE_RS17640															RHE_RS03210	RHE_RS03210
RHE_RS10220	RHE_RS10220
RHE_RS21030
															cluster_435
															RHE_RS22620
cluster_421															RHE_RS27195	RHE_RS27195
RHE_RS12615															RHE_RS15050
RHE_RS16325
RHE_RS03790
RHE_RS29975	RHE_RS29975
RHE_RS12620	RHE_RS12620														cluster_436
															RHE_RS03275	RHE_RS03275
															RHE_RS01740	RHE_RS01740
															RHE_RS06635
cluster_423
RHE_RS26850
RHE_RS18340	RHE_RS18340
RHE_RS26695	RHE_RS26695														cluster_440
RHE_RS21355	RHE_RS21355														RHE_RS20575	RHE_RS20575
RHE_RS00415	RHE_RS00415														RHE_RS11900
RHE_RS29195	RHE_RS29195														RHE_RS17400
RHE_RS29075	RHE_RS29075														RHE_RS01645
RHE_RS23080	RHE_RS23080														RHE_RS17940
RHE_RS01550
															cluster_441
cluster_426															RHE_RS25605	RHE_RS25605
RHE_RS14740															RHE_RS19345
RHE_RS29195	RHE_RS29195														RHE_RS24095	RHE_RS24095
RHE_RS25185	RHE_RS25185
															cluster_444
cluster_427															RHE_RS14410
RHE_RS25150															RHE_RS18175
RHE_RS06105	RHE_RS06105														RHE_RS17840	RHE_RS17840
															RHE_RS16110
cluster_430
RHE_RS09080	RHE_RS09080														cluster_446
RHE_RS22090	RHE_RS22090														RHE_RS22640
RHE_RS20715															RHE_RS27280	RHE_RS27280
RHE_RS18715
RHE_RS24540	RHE_RS24540
															cluster_451
															RHE_RS26800	RHE_RS26800
cluster_431															RHE_RS10940
RHE_RS02850
RHE_RS02855	RHE_RS02855
RHE_RS16815	RHE_RS16815
															cluster_454
															RHE_RS05730	RHE_RS05730
															RHE_RS28870
cluster_433
RHE_RS15360
RHE_RS18685	RHE_RS18685
RHE_RS15965															cluster_455
RHE_RS07245															RHE_RS03110
RHE_RS18580															RHE_RS26790	RHE_RS26790
RHE_RS09875
															cluster_456
cluster_434															RHE_RS23540	RHE_RS23540
RHE_RS20895															RHE_RS03150
RHE_RS11555															RHE_RS12915	RHE_RS12915
RHE_RS03775	RHE_RS03775
RHE_RS16825	RHE_RS16825
RHE_RS07350
															cluster_463
															RHE_RS25640
															RHE_RS20060	RHE_RS20060
cluster_435															RHE_RS02800
RHE_RS23665	RHE_RS23665														RHE_RS05140
RHE_RS15890	RHE_RS15890														RHE_RS29120
RHE_RS13960															RHE_RS10390
RHE_RS24455
RHE_RS15885
															cluster_465
															RHE_RS27715
cluster_443															RHE_RS25060	RHE_RS25060
RHE_RS11815															RHE_RS17145	RHE_RS17145
RHE_RS05730	RHE_RS05730														RHE_RS29270
RHE_RS16800	RHE_RS16800														RHE_RS26750
RHE_RS15015
RHE_RS08660
RHE_RS09845
RHE_RS15125															cluster_468
RHE_RS06960															RHE_RS26195
RHE_RS15185															RHE_RS31115
RHE_RS25500															RHE_RS18710	RHE_RS18710
RHE_RS12970															RHE_RS31120
RHE_RS04235															RHE_RS02425
RHE_RS26415
RHE_RS14540
RHE_RS02955
RHE_RS00705															cluster_471
RHE_RS11590															RHE_RS08955
RHE_RS26225															RHE_RS04025	RHE_RS04025
cluster_445															cluster_472
RHE_RS19905															RHE_RS09445	RHE_RS09445
RHE_RS06685															RHE_RS06290
RHE_RS11340	RHE_RS11340														RHE_RS14650
RHE_RS22605	RHE_RS22605
RHE_RS24110	RHE_RS24110
															cluster_473
															RHE_RS09075
cluster_446															RHE_RS07105	RHE_RS07105
RHE_RS01870
RHE_RS09605
RHE_RS25725	RHE_RS25725
RHE_RS17405															cluster_475
RHE_RS11370															RHE_RS28730
															RHE_RS03145
															RHE_RS09390
															RHE_RS05380	RHE_RS05380
cluster_448															RHE_RS21685
RHE_RS11975															RHE_RS22650
RHE_RS10745															RHE_RS22260
RHE_RS14355	RHE_RS14355
RHE_RS07480	RHE_RS07480
															cluster_477
															RHE_RS02600	RHE_RS02600
cluster_449															RHE_RS24010
RHE_RS10425	RHE_RS10425														RHE_RS18175
RHE_RS20595	RHE_RS20595														RHE_RS21830
cluster_452															cluster_478
RHE_RS18865	RHE_RS18865														RHE_RS32295
RHE_RS11535															RHE_RS16100	RHE_RS16100
RHE_RS11540															RHE_RS02640
															RHE_RS07105	RHE_RS07105
cluster_459
RHE_RS20110	RHE_RS20110														cluster_480
RHE_RS04330															RHE_RS02975
RHE_RS12325	RHE_RS12325														RHE_RS29195	RHE_RS29195
RHE_RS04435
RHE_RS09595
RHE_RS22060
															cluster_483
															RHE_RS11860	RHE_RS11860
															RHE_RS03465
cluster_461															RHE_RS17330
RHE_RS18710	RHE_RS18710														RHE_RS12930
RHE_RS17670															RHE_RS04970
RHE_RS24655															RHE_RS25740
RHE_RS28780															RHE_RS29190
RHE_RS27070															RHE_RS22235
RHE_RS27280	RHE_RS27280														RHE_RS02825
RHE_RS05935															RHE_RS15830
RHE_RS18100
RHE_RS20315
RHE_RS03315
RHE_RS18845															cluster_485
RHE_RS06050															RHE_RS12120
															RHE_RS22190	RHE_RS22190
cluster_462
RHE_RS23935															cluster_489
RHE_RS04645	RHE_RS04645														RHE_RS06160
RHE_RS05515															RHE_RS16800	RHE_RS16800
RHE_RS29080	RHE_RS29080														RHE_RS21825
															RHE_RS06380
															RHE_RS08125
															RHE_RS04030	RHE_RS04030
cluster_468															RHE_RS29120
RHE_RS30285	RHE_RS30285														RHE_RS09465
RHE_RS29775	RHE_RS29775														RHE_RS12420
RHE_RS13740															RHE_RS29265
															RHE_RS13440
cluster_469
RHE_RS10580	RHE_RS10580														cluster_490
RHE_RS09990															RHE_RS01350	RHE_RS01350
RHE_RS09995															RHE_RS12060	RHE_RS12060
															RHE_RS04310	RHE_RS04310
cluster_474
RHE_RS05065															cluster_492
RHE_RS01095	RHE_RS01095														RHE_RS15880
RHE_RS07285															RHE_RS20110	RHE_RS20110
RHE_RS15190															RHE_RS17955
RHE_RS18655															RHE_RS28785
RHE_RS07245															RHE_RS14280
RHE_RS15980															RHE_RS29255
cluster_477															cluster_494
RHE_RS04570															RHE_RS27975
RHE_RS13235	RHE_RS13235														RHE_RS27930	RHE_RS27930
RHE_RS04575	RHE_RS04575														RHE_RS26765	RHE_RS26765
cluster_479															cluster_497
RHE_RS16530															RHE_RS13295	RHE_RS13295
RHE_RS21900	RHE_RS21900														RHE_RS13300
RHE_RS24105
RHE_RS18015
RHE_RS08385
RHE_RS27570	RHE_RS27570														cluster_500
RHE_RS03040	RHE_RS03040														RHE_RS10960	RHE_RS10960
RHE_RS18010															RHE_RS06135	RHE_RS06135
RHE_RS16350															RHE_RS15155
cluster_483															cluster_501
RHE_RS01870															RHE_RS11040
RHE_RS00735															RHE_RS01465
RHE_RS20295															RHE_RS20110	RHE_RS20110
RHE_RS08130
RHE_RS20580	RHE_RS20580
RHE_RS00695
RHE_RS15835															cluster_502
RHE_RS20020															RHE_RS10990
RHE_RS15775															RHE_RS13835
															RHE_RS09660
															RHE_RS05300
															RHE_RS17450	RHE_RS17450
cluster_485
RHE_RS08300
RHE_RS08130
RHE_RS13980															cluster_504
RHE_RS09725															RHE_RS13115
RHE_RS11540															RHE_RS26275
RHE_RS10805															RHE_RS05850
RHE_RS20575	RHE_RS20575														RHE_RS06105	RHE_RS06105
cluster_486															cluster_505
RHE_RS08085															RHE_RS17815
RHE_RS17405															RHE_RS13750	RHE_RS13750
RHE_RS20775															RHE_RS05965
RHE_RS22770	RHE_RS22770														RHE_RS16110
RHE_RS20550
RHE_RS09785
RHE_RS22765
RHE_RS10735															cluster_508
RHE_RS17605															RHE_RS25890
RHE_RS16205	RHE_RS16205														RHE_RS02680
RHE_RS16200															RHE_RS24425
															RHE_RS01480	RHE_RS01480
															RHE_RS25965
															RHE_RS19500
cluster_492															RHE_RS30080
RHE_RS00340	RHE_RS00340														RHE_RS21830
RHE_RS00725	RHE_RS00725														RHE_RS13150
RHE_RS07065															RHE_RS07675
RHE_RS07070															RHE_RS28245
cluster_495															cluster_510
RHE_RS24725	RHE_RS24725														RHE_RS09025	RHE_RS09025
RHE_RS07015															RHE_RS05020	RHE_RS05020
															RHE_RS01345
															RHE_RS22790
															RHE_RS02890
cluster_497
RHE_RS18480
RHE_RS25595	RHE_RS25595
RHE_RS06105	RHE_RS06105														cluster_516
RHE_RS12560															RHE_RS12670	RHE_RS12670
RHE_RS08065															RHE_RS18685	RHE_RS18685
RHE_RS19375															RHE_RS06290
															RHE_RS08975
cluster_498
RHE_RS12920	RHE_RS12920														cluster_518
RHE_RS00250															RHE_RS13215	RHE_RS13215
RHE_RS15570															RHE_RS13220
RHE_RS00680
RHE_RS07065
RHE_RS21915	RHE_RS21915
RHE_RS28370	RHE_RS28370														cluster_519
RHE_RS07800															RHE_RS02570
RHE_RS11435															RHE_RS18760	RHE_RS18760
RHE_RS09860
															cluster_523
cluster_500															RHE_RS28170
RHE_RS00525															RHE_RS29535	RHE_RS29535
RHE_RS27845	RHE_RS27845														RHE_RS29800
RHE_RS09625
															cluster_524
cluster_502															RHE_RS00340	RHE_RS00340
RHE_RS13965	RHE_RS13965														RHE_RS00725	RHE_RS00725
RHE_RS13960															RHE_RS19045
															RHE_RS04645	RHE_RS04645
cluster_505
RHE_RS25905	RHE_RS25905														cluster_526
RHE_RS01935															RHE_RS22145
RHE_RS07590															RHE_RS20460	RHE_RS20460
RHE_RS07595															RHE_RS03000	RHE_RS03000
RHE_RS08925	RHE_RS08925
RHE_RS20485
															cluster_528
[truncated: 1,522 more rows]
