# Supplementary material for: Rhizobium etli CFN42 and Sinorhizobium meliloti 1021 bioinformatic transcriptional regulatory networks from culture and symbiosis
Source: Front Bioinform. 2024 Aug 28;4:1419274. doi: 10.3389/fbinf.2024.1419274 (PMC11387232; doi:10.3389/fbinf.2024.1419274)
Supplement: Supplementary file 6 [file Table5.xlsx]

## Sheet: Hoja1
a) Free-living clustered-TF network S. meliloti_1021															b) P-value distribution in the Free-living network of S. meliloti 1021					c) Hierarchy															d) Times a regulated gene
Locus_tag	Upstream_region	Matrix_ID	Chain	End_motif	Start_motif	Site	Weight	P_value	Ln_P_value	Significance		643 Unique Targets	259 Unique Tfs		P-value	Counts	Percentage			Tfs	Times-regulated gene	Start position of the gene	End position of the gene	Strand-gene	GI	Name locus	Locus tag	Protein product	aa of the protein	COG number	COG group	Function	Number of the gene		Gene	Times-regulated gene	Start position of the gene	End position of the gene	Strand-gene	GI	Name locus	Locus tag	Protein product	aa of the protein	COG number	COG group	Function	Number of the gene
SMc02893	D	SM_b20457_m1	D	-52	-42	CTCGTGCATTT	10.3	3.5e-06	-12563	5456		SMa0063	SMa0063		e-04 New_FL_DD_RR	14	0.332621			SMc02523	28	3268382	3269278	R	1234696	-	SMc02523	NP_387118.1	298	COG0583	K	transcriptional regulator	3022		SM_b20129	23	141805	142584	D	1236460	-	SM_b20129	NP_436669.1	259	COG1802	K	transcriptional regulator (plasmid)	4779
SMc03027	D	SM_b20457_m1	D	-86	-76	CCAGTGCATTA	10.3	3.5e-06	-12563	5456		SMa0078	SMa0078		e-05 New_FL_DD_RR	243	5.77334			SMc02470	21	3326844	3328049	D	1234749	-	SMc02470	NP_387171.1	401	COG1846	K	transcriptional regulator	3075		SM_b21080	20	717545	718369	D	1236990	-	SM_b21080	NP_437199.1	274	COG2197	TK	response regulator protein (plasmid)	5312
SMc01885	D	SM_b20457_m1	D	-217	-207	CGCGTGCATAT	10.0	6.6e-06	-11928	5180		SMa0089	SMa0097		e-06 New_FL_DD_RR	2561	60.8458			SMc01593	21	2525165	2525869	D	1234004	-	SMc01593	NP_386443.1	234	COG0745	TK	transcriptional regulator	2346		SMc04134	19	138020	138697	D	1231749	-	SMc04134	NP_384224.1	225	COG1309	K	transcriptional regulator	118
SM_b20285	R	SM_b20457_m1	R	-17	-7	CCAGTGCATTA	10.3	3.5e-06	-12563	5456		SMa0097	SMa0114		e-07 New_FL_DD_RR	547	12.996			SM_b21641	21	1669034	1669954	R	1237892	paaX	SM_b21641	NP_438100.1	306	COG3327	K	ArsR family transcriptional regulator (plasmid)	6208		SMc02172	19	522311	523540	R	1232110	-	SMc02172	NP_384581.1	409	COG1940	KG	transcriptional regulator	476
SM_b20263	D	SM_b20457_m2	D	-110	-81	ATATACTTTTTGTATACTAATTGTATTTTT	10.1	3.6e-06	-12535	5444		SMa0101	SMa0179		e-08 New_FL_DD_RR	228	5.41696			SMc02172	20	522311	523540	R	1232110	-	SMc02172	NP_384581.1	409	COG1940	KG	transcriptional regulator	476		SMa2215	19	1240820	1241587	D	1236232	-	SMa2215	NP_436441.1	255	COG2188	K	GntR family transcriptional regulator (plasmid)	4553
SM_b20337	R	SM_b20457_m2	R	-49	-20	TGACATACGCGGCGTATGCAACTAATTAGA	9.0	8.5e-06	-11675	5071		SMa0114	SMa0190		e-09 New_FL_DD_RR	159	3.77762			SMc00785	20	806545	807009	D	1232370	rirA	SMc00785	NP_384836.1	154	COG1959	K	iron-responsive transcriptional regulator	732		SMc00067	17	1107235	1107645	D	1232659	lppA	SMc00067	NP_385122.1	136	COG4520	M	outer-membranne lipoprotein	1019
SM_b20946	R	SM_b20457_m2	R	-288	-259	TTATAAAGTATTGTTAATAGACGCATCATT	10.2	3.3e-06	-12622	5481		SMa0179	SMa0222		e-10 New_FL_DD_RR	157	3.7301			SMc03873	19	3538506	3539372	R	1234950	rpoH2	SMc03873	NP_387362.2	288	COG0568	K	RNA polymerase factor sigma-32	3274		SM_b20263	17	268518	269324	D	1236584	-	SM_b20263	NP_436793.1	268	COG0834	ET	amino acid ABC transporter substrate-binding protein (plasmid)	4904
SMc01231	D	SM_b20457_m4	D	-55	-38	CCGCATTCGGCTATAAAA	10.8	2.3e-06	-12983	5638		SMa0190	SMa0246		e-11 New_FL_DD_RR	103	2.44714			SMc03816	19	3483136	3484338	D	1234893	-	SMc03816	NP_387305.1	400	COG1846	K	transcriptional regulator	3216		SMc00554	16	1223663	1225153	R	1232768	purF	SMc00554	NP_385230.1	496	COG0034	F	amidophosphoribosyltransferase	1128
SMa5007	R	SM_b20457_m4	R	-326	-309	GCGGATTTAGCGATAACG	12.1	8.8e-07	-13943	6056		SMa0222	SMa0281		e-12 New_FL_DD_RR	79	1.87693			SM_b21598	19	1138924	1139973	D	1237369	-	SM_b21598	NP_437578.1	349	COG1609	K	transcriptional regulator (plasmid)	5687		SM_b20946	16	1172859	1173539	R	1237400	exoY	SM_b20946	NP_437609.1	226	COG2148	M	galactosyltransferase (plasmid)	5718
SM_b20457	R	SM_b20457_m4	R	-202	-185	CGGGATTGGGTGATAATG	12.8	4.8e-07	-14549	6319		SMa0246	SMa0303		e-13 New_FL_DD_RR	38	0.902827			SM_b21115	19	756618	757106	R	1237025	-	SM_b21115	NP_437234.1	162	COG3707	TK	response regulator protein (plasmid)	5347		SMc04226	15	2051379	2051933	R	1233561	-	SMc04226	NP_386002.1	184			lipoprotein transmembrane	1902
SMc01495	R	SM_b20457_m5	R	-154	-142	TGATAAAAAAATA	10.6	4.0e-06	-12429	5398		SMa0247	SMa0307		e-14 New_FL_DD_RR	31	0.736517			SM_b20901	19	1310089	1311300	R	1237528	-	SM_b20901	NP_437737.1	403	COG1846	K	transcriptional regulator (plasmid)	5846		SMc02562	15	52483	54093	D	1231670	pckA	SMc02562	NP_384151.1	536	COG1866	C	phosphoenolpyruvate carboxykinase	45
SMa0557	R	SM_b20457_m5	R	-28	-16	ATATAAGTACAAT	9.9	8.1e-06	-11724	5092		SMa0281	SMa0319		e-15 New_FL_DD_RR	16	0.380138			SMa0498	19	271057	271956	R	1235082	-	SMa0498	NP_435508.1	299	COG0583	K	LysR family transcriptional regulator (plasmid)	3623		SMc02560	15	51419	52141	R	1231669	chvI	SMc02560	NP_384150.1	240	COG0745	TK	transcriptional regulator	44
SM_b20457	R	SM_b20457_m5	R	-207	-195	TGATAATGACAAT	11.0	2.5e-06	-12899	5602		SMa0303	SMa0347		e-16 New_FL_DD_RR	10	0.237586			SMc04134	18	138020	138697	D	1231749	-	SMc04134	NP_384224.1	225	COG1309	K	transcriptional regulator	118		SMc01801	15	1348142	1349074	R	1232885	argC	SMc01801	NP_385346.2	310	COG0002	E	N-acetyl-gamma-glutamyl-phosphate reductase	1245
SMc03005	D	SM_b20004_m2	D	-26	-1	TAGAGCATTTCAAGCGAGGGAAAAAT	8.7	7.4e-06	-11814	5131		SMa0307	SMa0355		e-17 New_FL_DD_RR	9	0.213828			SMc03046	18	742440	743111	D	1232317	-	SMc03046	NP_384784.1	223	COG0745	TK	transcriptional regulator	680		SMc00638	15	2939231	2940058	R	1234409	-	SMc00638	NP_386839.2	275	COG3637	M	HEAT resistant agglutinin 1 protein	2742
SMc00785	D	SM_b20004_m2	D	-87	-62	TGAACTTTTCCACTTTTTGGAATTGT	9.0	5.9e-06	-12041	5229		SMa0319	SMa0372		e-18 New_FL_DD_RR	11	0.261345			SMc02560	18	51419	52141	R	1231669	chvI	SMc02560	NP_384150.1	240	COG0745	TK	transcriptional regulator	44		SMc03150	14	3176745	3177458	R	1234620	-	SMc03150	NP_387049.1	237	COG2197	TK	transcriptional regulator	2952
SMc01260	D	SM_b20004_m2	D	-59	-34	TTGACTTTTACGTCAAAGTCAATAAT	10.2	2.4e-06	-12940	5620		SMa0347	SMa0402		e-19 New_FL_DD_RR	2	0.0475172			SMc02425	18	2797555	2798232	R	1234268	-	SMc02425	NP_386706.1	225	COG1802	K	transcriptional regulator	2610		SMc03131	13	3198252	3199079	R	1234639	-	SMc03131	NP_387068.1	275	COG0834	ET	amino acid-binding periplasmic ABC transporter protein	2971
SM_b20004	R	SM_b20004_m2	R	-38	-13	TCGATTATTGCACCATGTGAAATGGT	13.3	1.7e-07	-15587	6770		SMa0355	SMa0498		e-20 New_FL_DD_RR	1	0.0237586			SMc02366	18	1113918	1114619	D	1232665	-	SMc02366	NP_385128.1	233	COG0745	TK	transcriptional regulator	1025		SMc02463	13	3333868	3334260	R	1234756	sdhC	SMc02463	NP_387178.1	130	COG2009	C	succinate dehydrogenase cytochrome B-556 subunit transmembrane protein	3082
SM_b20106	D	SM_b20004_m2	D	-95	-70	AGGACGGTTCCCGATCCTGTAATAAT	9.4	4.4e-06	-12334	5357		SMa0372	SMa0520			4209	100			SMc02030	18	2734709	2735614	R	1234210	-	SMc02030	NP_386648.1	301	COG0583	K	transcriptional regulator	2552		SMc00654	13	2922080	2922781	D	1234394	ctrA	SMc00654	NP_386824.1	233	COG0745	TK	response regulator,controls chromosomal replication initiation protein	2727
SMc00785	D	SM_b20004_m3	D	-87	-62	TGAACTTTTCCACTTTTTGGAATTGT	7.7	2.4e-06	-12940	5620		SMa0402	SMa0557							SMc01762	18	1309800	1310135	D	1232844	-	SMc01762	NP_385306.1	111	COG0640	K	transcriptional regulator	1205		SMc00492	13	1917689	1918096	D	1233440	-	SMc00492	NP_385881.1	135			hypothetical protein SMc00492	1781
SMc00879	D	SM_b20004_m3	D	-98	-73	TTGATTGTTCCAGTATCCGGAACTGT	9.9	6.6e-07	-14231	6180		SMa0498	SMa0748							SM_b21208	18	960969	961691	R	1237205	-	SM_b21208	NP_437414.2	240	COG1309	K	TetR family transcriptional regulator (plasmid)	5523		SM_b21706	13	1655215	1656018	R	1237879	-	SM_b21706	NP_438087.1	267	COG1609	K	LacI family transcriptional regulator (plasmid)	6195
SMc01563	R	SM_b20004_m3	R	-112	-87	CCGATTATTTCCCCTGACGTAACGGG	8.4	1.6e-06	-13346	5796		SMa0520	SMa0815							SM_b21187	18	936834	937664	D	1237184	-	SM_b21187	NP_437393.1	276	COG0789	K	LacI family transcriptional regulator (plasmid)	5504		SMa5007	13	550344	550724	R	6435273	-	SMa5007	YP_002000351.1	126	COG5499	V	transcriptional regulator (plasmid)	3899
SMa1602	R	SM_b20004_m3	R	-67	-42	CGGATTTATCCTTAAATTGGAATAGT	5.3	8.9e-06	-11629	5051		SMa0557	SMa0849							SM_b20758	18	1551129	1551863	R	1237782	-	SM_b20758	NP_437990.2	244	COG2188	K	ArsR family transcriptional regulator (plasmid)	6098		SMc03046	12	742440	743111	D	1232317	-	SMc03046	NP_384784.1	223	COG0745	TK	transcriptional regulator	680
SM_b20004	R	SM_b20004_m3	R	-38	-13	TCGATTATTGCACCATGTGAAATGGT	26.4	5.1e-15	-32910	14292		SMa0748	SMa0955							SM_b20203	18	212468	213409	D	1236527	cbbR	SM_b20203	NP_436736.1	313	COG0583	K	transcriptional regulator (plasmid)	4846		SMc02425	12	2797555	2798232	R	1234268	-	SMc02425	NP_386706.1	225	COG1802	K	transcriptional regulator	2610
SM_b21317	D	SM_b20004_m3	D	-54	-29	GAAATTACTTCAAGTTTTGAAGTAAT	5.3	8.9e-06	-11629	5051		SMa0809	SMa1067							SMa5030	18	730316	730981	D	6435274	-	SMa5030	YP_002000352.1	221	COG1309	K	TetR family transcriptional regulator (plasmid)	4091		SMc02340	12	2761391	2762125	D	1234236	-	SMc02340	NP_386674.1	244	COG2188	K	transcriptional regulator	2578
SMc00947	D	SM_b20004_m4	D	-274	-245	GCATTTGCACACTATAAGTGCTCAAATAAC	5.6	5.2e-06	-12167	5284		SMa0815	SMa1207							SMc01945	17	2667667	2668083	D	1234147	-	SMc01945	NP_386585.1	138	COG1846	K	transcriptional regulator	2489		SMc01885	12	2321566	2323401	D	1233823	-	SMc01885	NP_386263.1	611	COG0006	E	aminopeptidase P protein	2166
SMc02498	R	SM_b20004_m4	R	-79	-50	GACCTAACATCTTGAATTTGCTGCAATAAC	4.5	9.4e-06	-11575	5027		SMa0849	SMa1299							SMc01403	17	2244554	2245018	R	1233746	-	SMc01403	NP_386186.1	154	COG1522	K	transcriptional regulator	2088		SMc01209	12	1719314	1719805	D	1233236	coaD	SMc01209	NP_385688.1	163	COG0669	H	phosphopantetheine adenylyltransferase	1587
SM_b20004	R	SM_b20004_m4	R	-38	-9	CCCCTCGATTATTGCACCATGTGAAATGGT	15.2	9.3e-09	-18493	8032		SMa0955	SMa1387							SMc00794	17	814780	815577	R	1232379	-	SMc00794	NP_384845.1	265	COG0784	T	two-component response regulator	741		SMc00737	12	2844485	2845042	R	1234310	-	SMc00737	NP_386741.1	185	COG1403	V	hypothetical protein SMc00737	2645
SM_b20999	R	SM_b20004_m4	R	-84	-55	AAACTAGGGCAATTCACATTGCGCAACAAT	12.8	5.4e-08	-16734	7268		SMa1067	SMa1442							SMc00679	17	2896434	2897375	D	1234368	-	SMc00679	NP_386799.1	313	COG2207	K	transcriptional regulator	2702		SM_b20387	12	398867	399586	R	1236704	-	SM_b20387	NP_436913.1	239	COG1414	K	transcriptional regulator (plasmid)	5024
SMc00785	D	SM_b20004_m5	D	-87	-61	TGAACTTTTCCACTTTTTGGAATTGTT	5.1	4.5e-06	-12311	5347		SMa1207	SMa1454							SMc00163	17	2002291	2003313	D	1233509	-	SMc00163	NP_385950.1	340	COG1879	G	transcriptional regulator	1850		SM_b20069	12	76205	77608	D	1236360	-	SM_b20069	NP_436609.1	467	COG1115	E	amino acid carrier protein (plasmid)	4719
SMc00879	D	SM_b20004_m5	D	-98	-72	TTGATTGTTCCAGTATCCGGAACTGTG	8.0	1.1e-06	-13720	5959		SMa1299	SMa1480							SMc00098	17	1056993	1057469	R	1232604	-	SMc00098	NP_385067.1	158	COG1846	K	transcriptional regulator	964		SMc04348	11	2231820	2232467	R	1233735	-	SMc04348	NP_386175.1	215	COG1309	K	transcriptional regulator	2077
SMc00983	R	SM_b20004_m5	R	-79	-53	TAAATCATCACAGTTAACGAATTGGTC	4.9	5.0e-06	-12206	5301		SMa1387	SMa1602							SM_b21021	17	644175	645122	D	1236925	-	SM_b21021	NP_437134.1	315	COG2390	K	transcriptional regulator (plasmid)	5247		SMc04323	11	2225161	2226387	R	1233728	-	SMc04323	NP_386168.1	408	COG1167	KE	aminotransferase	2070
SM_b20004	R	SM_b20004_m5	R	-39	-13	TCGATTATTGCACCATGTGAAATGGTC	26.1	5.2e-14	-30588	13284		SMa1442	SMa1705							SMa0748	17	402138	402587	D	1235218	-	SMa0748	NP_435644.2	149	COG4957	K	MucR family transcriptional regulator (plasmid)	3757		SM_b21102	11	744023	744805	R	1237012	-	SM_b21102	NP_437221.1	260	COG1414	K	transcriptional regulator (plasmid)	5334
SM_b21317	D	SM_b20004_m5	D	-54	-28	GAAATTACTTCAAGTTTTGAAGTAATT	5.1	4.5e-06	-12311	5347		SMa1454	SMa1720							SMc02984	16	3105638	3106531	D	1234553	-	SMc02984	NP_386982.1	297	COG0583	K	transcriptional regulator	2885		SM_b20901	11	1310089	1311300	R	1237528	-	SM_b20901	NP_437737.1	403	COG1846	K	transcriptional regulator (plasmid)	5846
SM_b20020	R	SM_b20021_m1	R	-69	-54	AACGGTTTCAATCTGA	19.6	3.9e-10	-21665	9409		SMa1480	SMa1726							SMc00458	16	1104977	1105648	D	1232657	feuP	SMc00458	NP_385120.1	223	COG0745	TK	transcriptional regulator	1017		SM_b20896	11	1304441	1305349	D	1237521	gbpR	SM_b20896	NP_437730.1	302	COG0583	K	LysR family transcriptional regulator (plasmid)	5839
SM_b20021	D	SM_b20021_m1	D	-67	-52	AACGGTTTCAATCTGA	19.6	3.9e-10	-21665	9409		SMa1587	SMa1736							SM_b21493	16	1414906	1415367	R	1237654	-	SM_b21493	NP_437862.1	153	COG1522	K	AsnC family transcriptional regulator (plasmid)	5971		SMc04260	10	2089458	2090528	D	1233595	-	SMc04260	NP_386036.1	356	COG1609	K	transcriptional regulator	1937
SMc02897	R	SM_b20021_m2	R	-57	-33	AAAAAACCGGCCCATCTTGAAATCG	8.7	6.7e-07	-14216	6174		SMa1602	SMa1749							SMa0097	16	50138	51079	R	1235274	-	SMa0097	NP_435295.1	313	COG0583	K	LysR family transcriptional regulator (plasmid)	3410		SMc03062	10	759384	760394	D	1232335	aglF	SMc03062	NP_384802.1	336	COG1175	G	alpha-glucoside ABC transporter permease	698
SMc02818	D	SM_b20021_m2	D	-150	-126	CCCATATACGGGAAAATTGCAACCC	6.3	2.5e-06	-12899	5602		SMa1698	SMa1893							SMc03820	15	3486754	3487437	R	1234897	-	SMc03820	NP_387309.1	227	COG0745	TK	transcriptional regulator	3220		SMc01769	10	1315387	1316718	D	1232851	-	SMc01769	NP_385313.1	443	COG2989	M	hypothetical protein SMc01769	1212
SM_b21559	R	SM_b20021_m2	R	-156	-132	CGGATAACGGCTCAGCGTGACACCA	4.2	7.6e-06	-11787	5119		SMa1705	SMa1948							SMc03122	15	3214897	3215844	R	1234654	-	SMc03122	NP_387077.1	315	COG0583	K	transcriptional regulator	2980		SMc01108	10	447637	448392	D	1232046	trmB	SMc01108	NP_384518.1	251	COG0220	J	tRNA (guanine-N(7)-)-methyltransferase	413
SMc03830	R	SM_b20021_m3	R	-141	-122	CGCAAACAGCTTCATCCATC	9.4	1.5e-06	-13410	5824		SMa1720	SMa1954							SMc02866	15	219195	219845	R	1231822	-	SMc02866	NP_384297.1	216	COG1309	K	transcriptional regulator	191		SMc00785	10	806545	807009	D	1232370	rirA	SMc00785	NP_384836.1	154	COG1959	K	iron-responsive transcriptional regulator	732
SM_b21491	R	SM_b20021_m3	R	-71	-52	CCGAAACAAATTCAGTAATG	7.3	5.2e-06	-12167	5284		SMa1726	SMa1979							SMc02584	15	72733	73317	R	1231690	actR	SMc02584	NP_384171.1	194	COG4567	TK	transcriptional regulator	65		SMc00489	10	1920037	1920627	D	1233443	-	SMc00489	NP_385884.1	196			hypothetical protein SMc00489	1784
SMc01592	D	SM_b20021_m4	D	-183	-163	ACATCCATCGCAAGGCAAAAG	10.8	9.6e-07	-13856	6018		SMa1736	SMa1987							SMc02504	15	3288599	3289051	R	1234715	-	SMc02504	NP_387137.1	150	COG1522	K	transcriptional regulator	3041		SMc00159	10	2008651	2009073	D	1233514	-	SMc00159	NP_385955.1	140	COG4961	UW	signal peptide protein	1855
SMc03874	R	SM_b20021_m4	R	-126	-106	TCCTCCAACGAAACGCAAACA	11.3	6.8e-07	-14201	6167		SMa1749	SMa2004							SMc01504	15	2624350	2625144	D	1234104	-	SMc01504	NP_386543.1	264	COG0784	T	two-component response regulator	2447		SMa1948	10	1105815	1106531	D	1236102	-	SMa1948	NP_436312.1	238	COG0664	T	Crp family transcriptional regulator (plasmid)	4425
SMc01010	D	SM_b20021_m5	D	-88	-69	GTGAAAAAGCTTTATCAGGC	7.2	8.7e-06	-11652	5060		SMa1893	SMa2015							SMc00646	15	2929335	2930240	D	1234402	rpoH1	SMc00646	NP_386832.1	301	COG0568	K	RNA polymerase factor sigma-32	2735		SMa0809	10	442329	442967	D	1235475	-	SMa0809	NP_435685.2	212			hypothetical protein SMa0809 (plasmid)	3799
SMc03830	R	SM_b20021_m5	R	-158	-139	ATCAAACTTCTTCATCGATC	7.1	8.7e-06	-11652	5060		SMa1927	SMa2027							SMc00283	15	1852376	1853278	D	1233371	-	SMc00283	NP_385817.1	300	COG0583	K	transcriptional regulator	1716		SMa0303	10	169064	169942	D	1235389	-	SMa0303	NP_435410.1	292	COG0583	K	LysR family transcriptional regulator (plasmid)	3526
SMc03830	R	SM_b20021_m5	R	-141	-122	CGCAAACAGCTTCATCCATC	9.0	2.7e-06	-12822	5569		SMa1948	SMa2049							SM_b21359	15	1024474	1024932	D	1237266	-	SM_b21359	NP_437475.1	152	COG0583	K	LysR family transcriptional regulator (plasmid)	5584		SMc04203	9	2188692	2189171	D	1233696	fecI	SMc04203	NP_386137.1	159	COG1595	K	RNA polymerase sigma factor FECI protein	2039
SM_b21491	R	SM_b20021_m5	R	-71	-52	CCGAAACAAATTCAGTAATG	7.4	7.7e-06	-11774	5114		SMa1954	SMa2107							SM_b20582	15	1596355	1597275	R	1237826	-	SM_b20582	NP_438034.1	306	COG0583	K	LysR family transcriptional regulator (plasmid)	6142		SMc03874	9	3539797	3540366	R	1234951	-	SMc03874	NP_387363.1	189	COG1329	K	hypothetical protein SMc03874	3275
SMc04260	D	SM_b20033_m1	D	-257	-243	TCTCGGAGGAGCCTT	9.5	7.1e-06	-11855	5149		SMa1979	SMa2163							SM_b20154	15	170752	171738	R	1236485	-	SM_b20154	NP_436694.1	328	COG1609	K	transcriptional regulator (plasmid)	4804		SMc03169	9	3130227	3130937	D	1234577	-	SMc03169	NP_387006.1	236	COG1309	K	transcriptional regulator	2909
SMc03879	R	SM_b20033_m1	R	-61	-47	AAAGGGAGGAGCGCG	10.3	3.8e-06	-12481	5420		SMa1987	SMa2215							SMa1979	15	1124993	1125865	D	1236123	-	SMa1979	NP_436333.1	290	COG0583	K	LysR family transcriptional regulator (plasmid)	4446		SMc03140	9	3190546	3191277	R	1234630	-	SMc03140	NP_387059.1	243	COG2188	K	transcriptional regulator	2962
SMa0190	D	SM_b20033_m1	D	-27	-13	ACGGGGCGGAGCGTG	9.1	9.7e-06	-11543	5013		SMa2004	SMa2287							SMc04163	14	2152254	2153150	R	1233657	-	SMc04163	NP_386098.1	298	COG0583	K	transcriptional regulator	2000		SMc02717	9	2564972	2566681	R	1234046	leuA1	SMc02717	NP_386485.3	569	COG0119	E	2-isopropylmalate synthase	2388
SM_b20033	R	SM_b20033_m1	R	-203	-189	GCACGGAGGAGCGTG	15.6	1.3e-08	-18158	7886		SMa2015	SMa2303							SMc04109	14	164746	166032	D	1231774	cpaE1	SMc04109	NP_384249.1	428	COG4963	UW	response regulator protein	143		SMc02470	9	3326844	3328049	D	1234749	-	SMc02470	NP_387171.1	401	COG1846	K	transcriptional regulator	3075
SMc01092	D	SM_b20033_m2	D	-23	-11	AAAATGGACCAAC	6.9	7.1e-06	-11855	5149		SMa2027	SMa2387							SMc03890	14	3557698	3558480	R	1234967	-	SMc03890	NP_387379.1	260	COG1349	KG	transcriptional regulator	3291		SMc02378	9	1132435	1133433	D	1232677	-	SMc02378	NP_385140.1	332	COG2113	E	periplasmic binding transmembrane protein	1037
SMc02737	D	SM_b20033_m2	D	-106	-94	TTAATGTACTGAG	7.0	6.8e-06	-11899	5167		SMa2049	SMa5007							SMc03150	14	3176745	3177458	R	1234620	-	SMc03150	NP_387049.1	237	COG2197	TK	transcriptional regulator	2952		SMc02323	9	694158	694970	D	1232268	-	SMc02323	NP_384735.1	270	COG1349	KG	transcriptional regulator	631
SMc00720	R	SM_b20033_m2	R	-223	-211	AAAAGGTACGAGC	6.9	7.1e-06	-11855	5149		SMa2107	SMa5030							SMc03123	14	3207160	3208107	D	1234647	-	SMc03123	NP_387076.1	315	COG2390	K	transcriptional regulator	2979		SMc01610	9	2399127	2400011	D	1233888	-	SMc01610	NP_386328.1	294	COG2207	K	transcriptional regulator	2231
SM_b21650	D	SM_b20033_m2	D	-59	-47	AAAATTTACTAAA	6.7	8.1e-06	-11724	5092		SMa2163	SM_b20004							SMc01974	14	2698596	2699288	D	1234176	-	SMc01974	NP_386614.1	230	COG1802	K	transcriptional regulator	2518		SMc01592	9	2524388	2524864	D	1234003	-	SMc01592	NP_386442.1	158	COG1846	K	transcriptional regulator	2345
SM_b20033	R	SM_b20033_m3	R	-160	-149	CGAACTAGTTAG	16.8	2.3e-08	-17588	7638		SMa2215	SM_b20021							SMc01615	14	2405599	2406384	R	1233893	-	SMc01615	NP_386333.1	261	COG1349	KG	transcriptional regulator	2236		SMc01495	9	2634580	2635533	R	1234113	smoC	SMc01495	NP_386552.1	317	COG2390	K	transcriptional regulator	2456
SMc00618	D	SM_b20033_m4	D	-47	-24	AAACTGGGGTAGCTCGTTCGTTCG	-0.2	9.5e-06	-11564	5022		SMa2287	SM_b20033							SMc00558	14	1228768	1229625	D	1232772	-	SMc00558	NP_385234.1	285	COG2207	K	transcriptional regulator	1132		SMc01347	9	1433876	1434328	D	1232965	-	SMc01347	NP_385423.1	150	COG4765	S	hypothetical protein SMc01347	1322
SMc03169	D	SM_b20033_m4	D	-159	-136	AAATCGAACCGGTCGGTTCGATTT	2.7	2.6e-06	-12860	5585		SMa2303	SM_b20039							SMc00479	14	1938413	1939429	R	1233458	-	SMc00479	NP_385899.1	338	COG2207	K	transcriptional regulator	1799		SMc00947	9	1774339	1774677	D	1233298	glnB	SMc00947	NP_385745.1	112	COG0347	TE	nitrogen regulatory protein PII	1644
SM_b20033	R	SM_b20033_m4	R	-168	-145	TTTCCGAACTAGTTAGTACATTTT	23.7	5.6e-12	-25908	11252		SMa2379	SM_b20048							SMc00241	14	1808061	1808810	R	1233325	-	SMc00241	NP_385772.1	249	COG2186	K	transcriptional regulator	1671		SMc00703	9	2875865	2876503	D	1234344	-	SMc00703	NP_386775.1	212	COG1738	S	hypothetical protein SMc00703	2679
SM_b20033	R	SM_b20033_m4	R	-164	-141	TGATTTTCCGAACTAGTTAGTACA	0.1	8.0e-06	-11736	5097		SMa2387	SM_b20055							SM_b21484	14	1405318	1405839	D	1237643	rpoE5	SM_b21484	NP_437851.1	173	COG1595	K	RNA polymerase sigma-E factor (sigma-24) protein (plasmid)	5960		SMc00604	9	1275457	1276095	D	1232817	ropB1	SMc00604	NP_385279.1	212	COG3637	M	outer membrane protein	1178
SM_b20129	D	SM_b20033_m4	D	-300	-277	AAAAGGAACGATATAGTATATTAT	-0.2	9.1e-06	-11607	5041		SMa5007	SM_b20106							SM_b21222	14	785200	786429	D	1237057	-	SM_b21222	NP_437266.1	409	COG1940	KG	transcriptional regulator (plasmid)	5378		SMc00241	9	1808061	1808810	R	1233325	-	SMc00241	NP_385772.1	249	COG2186	K	transcriptional regulator	1671
SM_b20033	R	SM_b20033_m5	R	-168	-149	CGAACTAGTTAGTACATTTT	26.2	2.7e-13	-28940	12569		SMa5030	SM_b20123							SM_b20683	14	1485370	1486269	R	1237722	-	SM_b20683	NP_437930.1	299	COG0583	K	LysR family transcriptional regulator (plasmid)	6039		SMc00034	9	1047631	1048614	D	1232596	-	SMc00034	NP_385059.1	327	COG0604	CR	oxidoreductase	956
SMc02484	R	SM_b20039_m1	R	-40	-28	CCAAACTGTCCGG	9.4	7.3e-06	-11828	5137		SM_b20004	SM_b20129							SM_b20674	14	1476114	1477133	D	1237713	-	SM_b20674	NP_437921.1	339	COG1609	K	LacI family transcriptional regulator (plasmid)	6030		SM_b21559	9	1099121	1100011	R	1237330	-	SM_b21559	NP_437539.1	296	COG2207	K	AraC family transcriptional regulator (plasmid)	5648
SM_b20039	R	SM_b20039_m1	R	-25	-13	CTTAACTGTACCT	10.8	2.6e-06	-12860	5585		SM_b20020	SM_b20154							SM_b20123	14	134261	135157	R	1236454	-	SM_b20123	NP_436663.1	298	COG0583	K	transcriptional regulator (plasmid)	4773		SM_b21346	9	1012574	1013626	D	1237253	-	SM_b21346	NP_437462.1	350	COG1609	K	LacI family transcriptional regulator (plasmid)	5571
SMc03941	R	SM_b20039_m2	R	-27	-4	GTCCAATTCTCCAAAATTCTGCGG	3.1	4.0e-06	-12429	5398		SM_b20021	SM_b20162							SM_b20004	14	7268	8173	R	1236420	gstR	SM_b20004	NP_436547.1	301	COG0583	K	gstR-like transcriptional regulator protein (plasmid)	4656		SM_b21021	9	644175	645122	D	1236925	-	SM_b21021	NP_437134.1	315	COG2390	K	transcriptional regulator (plasmid)	5247
SMa1927	D	SM_b20039_m2	D	-301	-278	GGACAGTTCGTCAAGTTTGTTAAG	2.8	4.3e-06	-12357	5367		SM_b20033	SM_b20203							SMa1454	14	801299	802342	D	1235829	-	SMa1454	NP_436039.2	347	COG2207	K	AraC family transcriptional regulator (plasmid)	4156		SM_b20203	9	212468	213409	D	1236527	cbbR	SM_b20203	NP_436736.1	313	COG0583	K	transcriptional regulator (plasmid)	4846
SM_b20039	R	SM_b20039_m2	R	-25	-2	TGACAGTTCCTCTTAACTGTACCT	10.2	1.3e-07	-15856	6886		SM_b20039	SM_b20211							SMa0190	14	104560	105189	D	1235325	-	SMa0190	NP_435346.1	209	COG1309	K	transcriptional regulator (plasmid)	3463		SMc03873	8	3538506	3539372	R	1234950	rpoH2	SMc03873	NP_387362.2	288	COG0568	K	RNA polymerase factor sigma-32	3274
SMc03941	R	SM_b20039_m3	R	-27	-4	GTCCAATTCTCCAAAATTCTGCGG	3.1	3.9e-06	-12455	5409		SM_b20048	SM_b20215							SMc04315	13	2133224	2134072	D	1233635	-	SMc04315	NP_386076.1	282	COG0583	K	transcriptional regulator	1977		SMc03846	8	3510902	3513592	R	1234923	acnA	SMc03846	NP_387335.1	896	COG1048	C	aconitate hydratase	3247
SMa1927	D	SM_b20039_m3	D	-301	-278	GGACAGTTCGTCAAGTTTGTTAAG	3.0	4.1e-06	-12405	5387		SM_b20055	SM_b20219							SMc04203	13	2188692	2189171	D	1233696	fecI	SMc04203	NP_386137.1	159	COG1595	K	RNA polymerase sigma factor FECI protein	2039		SMc02818	8	2376977	2377921	D	1233869	-	SMc02818	NP_386309.1	314	COG2267	I	hypothetical protein SMc02818	2212
SM_b20039	R	SM_b20039_m3	R	-25	-2	TGACAGTTCCTCTTAACTGTACCT	10.5	1.2e-07	-15936	6921		SM_b20056	SM_b20258							SMc04011	13	3005682	3007223	R	1234471	tacA	SMc04011	NP_386901.1	513	COG2204	T	sigma-54-dependent transcription regulator protein	2804		SMc02737	8	2591143	2592099	D	1234066	opuC	SMc02737	NP_386505.1	318	COG2113	E	glycine betaine-binding ABC transporter protein	2408
SMc00380	R	SM_b20039_m4	R	-83	-61	GTCAAGATACATTGGAGTAGAGT	8.9	1.3e-06	-13553	5886		SM_b20069	SM_b20276							SMc01610	13	2399127	2400011	D	1233888	-	SMc01610	NP_386328.1	294	COG2207	K	transcriptional regulator	2231		SMc02678	8	2528568	2529068	R	1234008	-	SMc02678	NP_386447.1	166	COG5465	S	hypothetical protein SMc02678	2350
SMc01769	D	SM_b20039_m4	D	-291	-269	TGACAGCGACGCTTGGGTGCGGT	6.0	7.3e-06	-11828	5137		SM_b20072	SM_b20285							SMc01570	13	2513073	2513963	R	1233988	-	SMc01570	NP_386427.1	296	COG0583	K	transcriptional regulator	2330		SMc02408	8	1163909	1164316	D	1232708	rpoZ	SMc02408	NP_385170.1	135	COG1758	K	DNA-directed RNA polymerase subunit omega	1068
SMc01350	D	SM_b20039_m4	D	-72	-50	TGCCAGAGCCGGCATTGTCCAGT	7.3	3.6e-06	-12535	5444		SM_b20106	SM_b20337							SMc01406	13	2248249	2249667	R	1233751	-	SMc01406	NP_386191.1	472	COG1167	KE	transcriptional regulator	2093		SMc02396	8	1148609	1149646	D	1232696	-	SMc02396	NP_385158.1	345	COG3203	M	outer membrane protein	1055
SMc01202	R	SM_b20039_m5	R	-100	-71	GCGTACTATGCCGTCAGTCTCACAGCCGGT	5.1	4.7e-06	-12268	5328		SM_b20123	SM_b20347							SMc01225	13	1699144	1700052	R	1233220	-	SMc01225	NP_385672.1	302	COG0583	K	transcriptional regulator	1571		SMc02240	8	604544	605179	R	1232181	-	SMc02240	NP_384650.1	211	COG1284	S	hypothetical protein SMc02240	545
SM_b20039	R	SM_b20039_m5	R	-47	-18	CTGTACCTTACTGTCTCTGGAACAGCCAGC	19.1	5.0e-10	-21416	9301		SM_b20129	SM_b20366							SMc00929	13	898303	899283	R	1232460	-	SMc00929	NP_384925.1	326	COG0583	K	transcriptional regulator	821		SMc02101	8	1607757	1608524	D	1233148	rpsB	SMc02101	NP_385601.1	255	COG0052	J	30S ribosomal protein S2	1500
SM_b20773	D	SM_b20039_m5	D	-127	-98	CTGTATGCAGCATTTTCTGTTGACGACGTC	8.1	1.0e-06	-13816	6000		SM_b20154	SM_b20367							SMc00829	13	850072	850899	R	1232415	-	SMc00829	NP_384880.1	275	COG2186	K	transcriptional regulator	776		SMc02063	8	1654441	1655211	D	1233186	surE	SMc02063	NP_385639.1	256	COG0496	L	stationary phase survival protein SurE	1538
SMc01202	R	SM_b20048_m1	R	-112	-99	GTCTAGCCTGAATA	9.6	6.2e-06	-11991	5208		SM_b20162	SM_b20387							SMc00654	13	2922080	2922781	D	1234394	ctrA	SMc00654	NP_386824.1	233	COG0745	TK	response regulator,controls chromosomal replication initiation protein	2727		SMc01875	8	2333017	2333985	R	1233833	lpxC	SMc01875	NP_386273.1	322	COG0774	M	UDP-3-O	2176
SMc00241	R	SM_b20048_m1	R	-73	-60	CACTAGATCGAATA	11.0	2.1e-06	-13074	5678		SM_b20203	SM_b20392							SMc00275	13	1844280	1845254	D	1233363	-	SMc00275	NP_385809.1	324	COG0583	K	transcriptional regulator	1708		SMc00953	8	1780439	1781368	R	1233304	-	SMc00953	NP_385751.1	309	COG2207	K	transcriptional regulator	1650
SM_b20048	D	SM_b20048_m1	D	-35	-22	GCCTACACCGAAGA	12.0	9.5e-07	-13867	6022		SM_b20211	SM_b20426							SM_b21576	13	1115394	1115759	R	1237347	-	SM_b21576	NP_437556.1	121	COG0640	K	ArsR family transcriptional regulator (plasmid)	5665		SMc00831	8	852348	853244	R	1232417	-	SMc00831	NP_384882.1	298	COG0583	K	transcriptional regulator	778
SMc01215	R	SM_b20048_m2	R	-162	-140	GGAATCGACAAGAAAGCAAAGAT	9.3	5.1e-06	-12186	5292		SM_b20215	SM_b20441							SM_b21346	13	1012574	1013626	D	1237253	-	SM_b21346	NP_437462.1	350	COG1609	K	LacI family transcriptional regulator (plasmid)	5571		SMc00821	8	843040	843336	D	1232407	-	SMc00821	NP_384872.1	98	COG5457	S	hypothetical protein SMc00821	768
SMc02022	R	SM_b20048_m2	R	-79	-57	GCAATTGCGTCAAAGCAGAAGAG	8.2	9.5e-06	-11564	5022		SM_b20219	SM_b20455							SM_b20537	13	561216	562244	R	1236847	-	SM_b20537	NP_437056.1	342	COG1609	K	transcriptional regulator (plasmid)	5169		SMc00820	8	841879	842829	R	1232406	-	SMc00820	NP_384871.1	316	COG0583	K	transcriptional regulator	767
SM_b20048	D	SM_b20048_m2	D	-43	-21	GCAATCGTGCCTACACCGAAGAA	20.6	1.1e-12	-27536	11959		SM_b20258	SM_b20457							SM_b20509	13	531624	532391	D	1236822	-	SM_b20509	NP_437031.1	255	COG2186	K	transcriptional regulator (plasmid)	5143		SM_b21317	8	983901	984485	D	1237224	wggR	SM_b21317	NP_437433.1	194	COG1846	K	transcriptional activator of exopolysaccharide II synthesis, MarR family protein (plasmid)	5542
SM_b20048	D	SM_b20048_m3	D	-111	-82	GGCTGTCGTCTTGGCGCGAAATGGGTAAGG	34.2	1.1e-18	-41351	17959		SM_b20262	SM_b20494							SM_b20258	13	263237	263947	D	1236579	-	SM_b20258	NP_436788.1	236	COG1802	K	transcriptional regulator (plasmid)	4899		SM_b21196	8	945018	946616	D	1237192	oppA	SM_b21196	NP_437401.1	532	COG4166	E	oligopeptide uptake ABC transporter substrate-binding protein precursor (plasmid)	5510
SMc01875	R	SM_b20048_m4	R	-323	-309	TCCGCATGTTTCCCT	10.9	1.3e-06	-13553	5886		SM_b20263	SM_b20509							SM_b20055	13	63995	64984	D	1236346	-	SM_b20055	NP_436595.1	329	COG4977	K	transcriptional regulator (plasmid)	4704		SM_b21010	8	1244108	1244884	D	1237467	bdhA	SM_b21010	NP_437676.1	258	COG1028	IQR	D-beta-hydroxybutyrate dehydrogenase (plasmid)	5785
SMc03820	R	SM_b20048_m4	R	-88	-74	GCCGCATGTTTCCTT	11.0	1.1e-06	-13720	5959		SM_b20276	SM_b20516							SM_b20033	13	43775	44437	R	1236449	-	SM_b20033	NP_436576.1	220	COG1309	K	transcriptional regulator (plasmid)	4685		SM_b21009	8	1242315	1243808	R	1237466	glpK	SM_b21009	NP_437675.1	497	COG0554	C	glycerol kinase (plasmid)	5784
SMa0078	D	SM_b20048_m4	D	-82	-68	TGCGCACTTTTCCTG	9.5	9.2e-06	-11596	5036		SM_b20285	SM_b20525							SMa1602	13	893872	894747	R	1235909	-	SMa1602	NP_436119.2	291	COG0583	K	LysR family transcriptional regulator (plasmid)	4237		SM_b20859	8	1263877	1264827	D	1237483	-	SM_b20859	NP_437692.1	316	COG2207	K	AraC family transcriptional regulator (plasmid)	5801
SMc01781	R	SM_b20055_m1	R	-43	-23	CGATTGGCAGATCGGCCATTG	12.2	6.5e-07	-14246	6187		SM_b20292	SM_b20531							SMa0347	13	188006	188893	D	1235412	-	SMa0347	NP_435433.1	295	COG0583	K	LysR family transcriptional regulator (plasmid)	3550		SM_b20817	8	605893	606924	R	1236888	-	SM_b20817	NP_437097.1	343	COG1879	G	LacI family transcriptional regulator (plasmid)	5210
SMc01782	D	SM_b20055_m1	D	-119	-99	CGATTGGCAGATCGGCCATTG	12.2	6.5e-07	-14246	6187		SM_b20337	SM_b20537							SMc04143	12	128940	129662	D	1231740	-	SMc04143	NP_384215.1	240	COG2186	K	transcriptional regulator	109		SM_b20366	8	378030	379034	D	1236683	-	SM_b20366	NP_436892.1	334	COG1609	K	LacI family transcriptional regulator (plasmid)	5003
SMc02103	R	SM_b20055_m1	R	-132	-112	GCATTGGCGGCGAGTCCAACA	9.9	4.0e-06	-12429	5398		SM_b20347	SM_b20582							SMc04055	12	3057996	3058952	R	1234515	-	SMc04055	NP_386944.1	318	COG0583	K	transcriptional regulator	2847		SM_b20154	8	170752	171738	R	1236485	-	SM_b20154	NP_436694.1	328	COG1609	K	transcriptional regulator (plasmid)	4804
SM_b20055	D	SM_b20055_m1	D	-53	-33	GGATTGGCGGATCGGACATTA	18.8	8.7e-11	-23165	10060		SM_b20366	SM_b20586							SMc03998	12	2996119	2996379	D	1234458	-	SMc03998	NP_386888.1	86	COG0640	K	transcriptional regulator	2791		SMc03879	7	3546544	3547725	R	1234956	phbA	SMc03879	NP_387368.1	393	COG0183	I	acetyl-CoA acetyltransferase	3280
SMc01781	R	SM_b20055_m2	R	-43	-23	CGATTGGCAGATCGGCCATTG	9.2	2.4e-06	-12940	5620		SM_b20367	SM_b20667							SMc01908	12	1370272	1370745	R	1232905	-	SMc01908	NP_385366.1	157	COG1846	K	transcriptional regulator	1265		SMc03122	7	3214897	3215844	R	1234654	-	SMc03122	NP_387077.1	315	COG0583	K	transcriptional regulator	2980
SMc01782	D	SM_b20055_m2	D	-119	-99	CGATTGGCAGATCGGCCATTG	9.2	2.4e-06	-12940	5620		SM_b20387	SM_b20674							SMc01269	12	1505248	1505646	R	1233047	-	SMc01269	NP_385501.1	132	COG1396	K	transcriptional regulator	1400		SMc03038	7	732812	733996	D	1232309	flaB	SMc03038	NP_384776.1	394	COG1344	N	flagellin B protein	672
SMc04252	R	SM_b20055_m2	R	-140	-120	GGCGGGGCGAAGGGGACAGCG	9.2	2.4e-06	-12940	5620		SM_b20392	SM_b20683							SMc01260	12	1515627	1516013	D	1233057	-	SMc01260	NP_385510.1	128	COG0789	K	transcriptional regulator	1409		SMc02984	7	3105638	3106531	D	1234553	-	SMc02984	NP_386982.1	297	COG0583	K	transcriptional regulator	2885
SM_b20055	D	SM_b20055_m2	D	-53	-33	GGATTGGCGGATCGGACATTA	18.5	9.3e-10	-20796	9032		SM_b20426	SM_b20722							SMc00820	12	841879	842829	R	1232406	-	SMc00820	NP_384871.1	316	COG0583	K	transcriptional regulator	767		SMc02884	7	240021	241013	R	1231840	-	SMc02884	NP_384315.1	330	COG1744	M	lipoprotein	209
SM_b20055	D	SM_b20055_m2	D	-32	-12	GGCGGGCCGAAACCGACAAAG	17.8	2.5e-09	-19807	8602		SM_b20441	SM_b20758							SMc00698	12	2881681	2881962	D	1234349	-	SMc00698	NP_386780.1	93	COG0271	T	transcriptional regulator	2684		SMc02543	7	1216832	1218541	D	1232763	-	SMc02543	NP_385225.1	569	COG1652	S	hypothetical protein SMc02543	1123
SMc00058	D	SM_b20055_m3	D	-15	-2	ATAGGAGAAAGAAA	12.0	7.7e-07	-14077	6114		SM_b20448	SM_b20773							SM_b20773	12	1565858	1566544	D	1237797	-	SM_b20773	NP_438005.1	228	COG1802	K	GntR family transcriptional regulator (plasmid)	6113		SMc01975	7	2699551	2700267	D	1234177	-	SMc01975	NP_386615.1	238	COG2186	K	transcriptional regulator	2519
SMc02094	D	SM_b20055_m4	D	-59	-30	GTGACCGGAGTCGGCACGAAACTGCCGCGG	3.6	5.1e-06	-12186	5292		SM_b20455	SM_b20817							SM_b20722	12	1527168	1527845	R	1237761	-	SM_b20722	NP_437969.1	225	COG0745	TK	two-component response regulator protein (plasmid)	6077		SMc01819	7	2642750	2643391	R	1234119	-	SMc01819	NP_386558.1	213	COG1309	K	transcriptional regulator	2462
SMc00293	R	SM_b20055_m4	R	-73	-44	GGGGCAAATTGGGTGCGGAAACGGGCACAG	3.5	5.4e-06	-12129	5268		SM_b20456	SM_b20859							SM_b20531	12	554980	555516	D	1236841	-	SM_b20531	NP_437050.1	178	COG1595	K	RNA polymerase sigma factor (plasmid)	5163		SMc01593	7	2525165	2525869	D	1234004	-	SMc01593	NP_386443.1	234	COG0745	TK	transcriptional regulator	2346
SMc00140	D	SM_b20055_m4	D	-223	-194	CCGACATTAACCGGTCCTGAACGGCCCGTT	2.3	9.6e-06	-11554	5018		SM_b20457	SM_b20896							SM_b20457	12	468904	470052	R	1236770	-	SM_b20457	NP_436979.1	382	COG2207	K	transcriptional regulator transcription regulator protein (plasmid)	5090		SMc01570	7	2513073	2513963	R	1233988	-	SMc01570	NP_386427.1	296	COG0583	K	transcriptional regulator	2330
SM_b20055	D	SM_b20055_m4	D	-41	-12	CGGACATTAGGCGGGCCGAAACCGACAAAG	32.6	1.8e-17	-38556	16745		SM_b20494	SM_b20901							SM_b20347	12	354773	355381	R	1236664	-	SM_b20347	NP_436873.1	202	COG1309	K	transcriptional regulator (plasmid)	4984		SMc01163	7	387088	388218	R	1231990	-	SMc01163	NP_384462.1	376	COG0673	R	oxidoreductase	357
SMc04220	R	SM_b20106_m1	R	-137	-113	CACTGGCGCAACTGGTCCTCGACGG	10.0	6.1e-06	-12007	5215		SM_b20509	SM_b20935							SM_b20215	12	222993	223973	D	1236539	-	SM_b20215	NP_436748.1	326	COG4977	K	transcriptional regulator (plasmid)	4858		SMc01136	7	414402	415070	R	1232018	-	SMc01136	NP_384490.1	222	COG5375	S	hypothetical protein SMc01136	385
SMa0748	D	SM_b20106_m1	D	-224	-200	TCCTGGCGCACCGAGGACGCGACGT	11.2	2.1e-06	-13074	5678		SM_b20516	SM_b21008							SM_b20211	12	218142	219074	R	1236535	-	SM_b20211	NP_436744.1	310	COG0583	K	transcriptional regulator (plasmid)	4854		SMc00888	7	895248	896984	D	1232458	-	SMc00888	NP_384923.1	578	COG0784	T	2-component receiver domain-containing protein	819
SMc01163	R	SM_b20106_m2	R	-161	-151	AGAATGTGTTA	11.2	3.6e-06	-12535	5444		SM_b20523	SM_b21021							SMa2027	12	1147165	1148058	R	1236145	-	SMa2027	NP_436355.1	297	COG0583	K	LysR family transcriptional regulator (plasmid)	4467		SMc00794	7	814780	815577	R	1232379	-	SMc00794	NP_384845.1	265	COG0784	T	two-component response regulator	741
SMc00191	R	SM_b20106_m2	R	-367	-357	CTAATGTGTCA	10.9	5.8e-06	-12058	5237		SM_b20525	SM_b21079							SMa1480	12	814015	814902	D	1235842	-	SMa1480	NP_436052.2	295	COG0583	K	LysR family transcriptional regulator (plasmid)	4169		SMc00432	7	379920	380720	R	1231985	iolB	SMc00432	NP_384457.1	266	COG3718	G	myo-inositol catabolism protein	352
SMc00654	D	SM_b20106_m2	D	-107	-97	AGAATTTGTTA	10.6	6.9e-06	-11884	5161		SM_b20531	SM_b21080							SMa1299	12	709054	709665	D	1235743	-	SMa1299	NP_435953.1	203	COG1309	K	TetR family transcriptional regulator (plasmid)	4068		SMc00109	7	1071584	1072051	R	1232622	-	SMc00109	NP_385085.1	155	COG0789	K	transcriptional regulator	982
SMa0748	D	SM_b20106_m2	D	-32	-22	TCAATTTGTAA	10.3	9.7e-06	-11543	5013		SM_b20537	SM_b21093							SMa1207	12	661869	662549	R	1235693	-	SMa1207	NP_435903.2	226	COG0664	T	Crp family transcriptional regulator (plasmid)	4020		SMc00058	7	1091371	1091802	D	1232642	mucR	SMc00058	NP_385105.1	143	COG4957	K	transcriptional regulator	1002
SM_b20106	D	SM_b20106_m2	D	-66	-56	TTAATGTGTTA	11.6	2.3e-06	-12983	5638		SM_b20556	SM_b21102							SMa0303	12	169064	169942	D	1235389	-	SMa0303	NP_435410.1	292	COG0583	K	LysR family transcriptional regulator (plasmid)	3526		SM_b21641	7	1669034	1669954	R	1237892	paaX	SM_b21641	NP_438100.1	306	COG3327	K	ArsR family transcriptional regulator (plasmid)	6208
SMc00794	R	SM_b20106_m4	R	-154	-137	ACCGGCTGGTGCGGCCTT	10.1	7.3e-06	-11828	5137		SM_b20582	SM_b21115							SMc04348	11	2231820	2232467	R	1233735	-	SMc04348	NP_386175.1	215	COG1309	K	transcriptional regulator	2077		SM_b21533	7	1059672	1060457	D	1237304	-	SM_b21533	NP_437513.1	261	COG1349	KG	GntR family transcriptional regulator (plasmid)	5622
SMc01769	D	SM_b20106_m4	D	-223	-206	GCCTGCCGGGGCGGCTCT	10.7	4.5e-06	-12311	5347		SM_b20586	SM_b21117							SMc04032	11	3035290	3036072	R	1234491	-	SMc04032	NP_386921.1	260	COG2197	TK	transcriptional regulator	2824		SM_b21299	7	880615	881406	D	1237134	deoR	SM_b21299	NP_437343.1	263	COG1349	KG	DeoR family transcriptional regulator (plasmid)	5454
SMc04251	R	SM_b20106_m5	R	-15	-3	GGTTCCTCCCTGT	14.1	5.4e-08	-16734	7268		SM_b20667	SM_b21158							SMc03165	11	3124767	3125804	R	1234573	-	SMc03165	NP_387002.1	345	COG1879	G	transcriptional regulator	2905		SM_b21222	7	785200	786429	D	1237057	-	SM_b21222	NP_437266.1	409	COG1940	KG	transcriptional regulator (plasmid)	5378
SMc00159	D	SM_b20123_m1	D	-105	-90	CAAAAACAATGGGTTG	10.2	6.3e-06	-11975	5201		SM_b20674	SM_b21169							SMc03060	11	756368	757438	R	1232333	aglR	SMc03060	NP_384800.1	356	COG1609	K	transcriptional regulator	696		SM_b21008	7	1241735	1242067	R	1237465	-	SM_b21008	NP_437674.1	110	COG0640	K	ArsR family transcriptional regulator (plasmid)	5783
SM_b20123	R	SM_b20123_m1	R	-97	-82	CAAAAACAATGGATGT	16.7	2.5e-10	-22110	9602		SM_b20683	SM_b21180							SMc02893	11	250422	251348	D	1231850	-	SMc02893	NP_384324.1	308	COG0583	K	transcriptional regulator	219		SM_b20773	7	1565858	1566544	D	1237797	-	SM_b20773	NP_438005.1	228	COG1802	K	GntR family transcriptional regulator (plasmid)	6113
SM_b21021	D	SM_b20123_m1	D	-114	-99	CAAAATCAACGGATTG	12.1	8.0e-07	-14039	6097		SM_b20705	SM_b21187							SMc02323	11	694158	694970	D	1232268	-	SMc02323	NP_384735.1	270	COG1349	KG	transcriptional regulator	631		SM_b20705	7	1507236	1508147	D	1237744	-	SM_b20705	NP_437952.1	303	COG0697	GER	hypothetical protein SM_b20705 (plasmid)	6060
SMc03060	R	SM_b20123_m2	R	-132	-116	TCTTGCGCCGCAAAACG	9.7	7.2e-06	-11841	5143		SM_b20712	SM_b21208							SMc02223	11	584615	585271	R	1232165	-	SMc02223	NP_384634.1	218	COG2932	X	transcriptional regulator	529		SM_b20674	7	1476114	1477133	D	1237713	-	SM_b20674	NP_437921.1	339	COG1609	K	LacI family transcriptional regulator (plasmid)	6030
SMc03061	D	SM_b20123_m2	D	-206	-190	TCTTGCGCCGCAAAACG	9.7	7.2e-06	-11841	5143		SM_b20722	SM_b21210							SMc02175	11	520434	521138	R	1232107	-	SMc02175	NP_384578.1	234	COG0664	T	transcriptional regulator	473		SM_b20456	7	468077	468823	D	1236769	-	SM_b20456	NP_436978.1	248	COG1028	IQR	dehydrogenasereductase (plasmid)	5089
SMc00786	D	SM_b20123_m2	D	-105	-89	CATTGCGACGCCAAATG	10.5	3.8e-06	-12481	5420		SM_b20749	SM_b21222							SMc01787	11	1331907	1332437	D	1232869	-	SMc01787	NP_385331.1	176	COG0789	K	transcriptional regulator	1230		SM_b20455	7	467358	467972	R	1236768	-	SM_b20455	NP_436977.1	204	COG1309	K	transcriptional regulator (plasmid)	5088
SMc01292	D	SM_b20123_m2	D	-35	-19	GATTGCACCCGGAAAAG	12.5	5.8e-07	-14360	6237		SM_b20755	SM_b21270							SMc01768	11	1314450	1314962	D	1232850	-	SMc01768	NP_385312.1	170	COG1846	K	transcriptional regulator	1211		SMa0498	7	271057	271956	R	1235082	-	SMa0498	NP_435508.1	299	COG0583	K	LysR family transcriptional regulator (plasmid)	3623
SMc02059	R	SM_b20123_m2	R	-179	-163	GTTTGCGCTGGAAAAGA	9.4	9.6e-06	-11554	5018		SM_b20758	SM_b21272							SMc00831	11	852348	853244	R	1232417	-	SMc00831	NP_384882.1	298	COG0583	K	transcriptional regulator	778		SMa0089	7	46684	47100	D	1235270	-	SMa0089	NP_435291.1	138	COG0251	V	hypothetical protein SMa0089 (plasmid)	3406
SMc02058	D	SM_b20123_m2	D	-180	-164	GTTTGCGCTGGAAAAGA	9.4	9.6e-06	-11554	5018		SM_b20759	SM_b21299							SMc00490	11	1918527	1919945	D	1233442	-	SMc00490	NP_385883.1	472	COG1167	KE	transcriptional regulator	1783		SMc04291	6	2210543	2211871	D	1233715	-	SMc04291	NP_386155.1	442	COG2133	G	L-sorbosone dehydrogenase (SNDH) protein	2057
SMc03846	R	SM_b20123_m2	R	-247	-231	TTTTGCTCTGCGAAAAG	12.9	3.7e-07	-14810	6432		SM_b20773	SM_b21336							SMc00058	11	1091371	1091802	D	1232642	mucR	SMc00058	NP_385105.1	143	COG4957	K	transcriptional regulator	1002		SMc04252	6	2078764	2079792	R	1233587	-	SMc04252	NP_386028.1	342	COG0667	R	oxidoreductase	1929
SMa2215	D	SM_b20123_m2	D	-208	-192	TATTGCGATTTAAAATG	12.4	6.5e-07	-14246	6187		SM_b20806	SM_b21346							SM_b21650	11	1681406	1682485	D	1237901	-	SM_b21650	NP_438109.1	359	COG1609	K	LacI family transcriptional regulator (plasmid)	6217		SMc04251	6	2077366	2078472	R	1233586	-	SMc04251	NP_386027.1	368	COG4663	Q	mannitol-binding periplasmic signal peptide protein	1928
SMc00551	D	SM_b20123_m3	D	-89	-62	AGTCCTCTGTCTCCGGGTCTTCGACATT	5.7	5.4e-06	-12129	5268		SM_b20808	SM_b21359							SM_b21559	11	1099121	1100011	R	1237330	-	SM_b21559	NP_437539.1	296	COG2207	K	AraC family transcriptional regulator (plasmid)	5648		SMc04169	6	2157476	2158480	D	1233663	-	SMc04169	NP_386104.1	334	COG4977	K	transcriptional regulator	2006
SM_b20123	R	SM_b20123_m3	R	-91	-64	GTTCCCCTTTTTCGGGCGCAAAAACAAT	29.4	8.8e-17	-36969	16056		SM_b20817	SM_b21372							SMa1749	11	991460	992359	R	1236000	-	SMa1749	NP_436210.1	299	COG2207	K	transcriptional regulator (plasmid)	4325		SMc04093	6	3634753	3636702	R	1235021	acsA1	SMc04093	NP_387433.1	649	COG0365	I	acetyl-CoA synthetase	3345
SM_b20123	R	SM_b20123_m4	R	-65	-48	GTTCCGCTTGAGCCAAGT	18.6	9.5e-11	-23077	10022		SM_b20859	SM_b21419							SMa0372	11	199105	200004	R	1235425	-	SMa0372	NP_435446.1	299	COG0583	K	LysR family transcriptional regulator (plasmid)	3561		SMc04010	6	3003684	3005372	R	1234470	-	SMc04010	NP_386900.1	562	COG3108	S	hypothetical protein SMc04010	2803
SM_b20123	R	SM_b20123_m5	R	-65	-53	GCTTGAGCCAAGT	11.3	6.3e-07	-14278	6201		SM_b20873	SM_b21464							SMc04260	10	2089458	2090528	D	1233595	-	SMc04260	NP_386036.1	356	COG1609	K	transcriptional regulator	1937		SMc03843	6	3508582	3508896	R	1234920	-	SMc03843	NP_387332.1	104	COG0640	K	transcriptional regulator	3244
SMc04260	D	SM_b20129_m1	D	-386	-372	TGAAAATACAATTTT	9.2	6.4e-06	-11959	5194		SM_b20875	SM_b21484							SMc04220	10	2047050	2047367	R	1233555	-	SMc04220	NP_385996.1	105	COG0640	K	transcriptional regulator	1896		SMc03820	6	3486754	3487437	R	1234897	-	SMc03820	NP_387309.1	227	COG0745	TK	transcriptional regulator	3220
SM_b20129	D	SM_b20129_m1	D	-379	-365	TCATAATAGATATAT	13.8	1.9e-07	-15476	6721		SM_b20894	SM_b21493							SMc02140	10	572383	573066	D	1232151	phoB	SMc02140	NP_384621.1	227	COG0745	TK	phosphate regulon transcriptional regulatory protein	516		SMc03124	6	3205150	3206778	R	1234646	-	SMc03124	NP_387075.1	542	COG0747	E	periplasmic binding ABC transporter protein	2978
SM_b20129	D	SM_b20129_m1	D	-114	-100	AGAGAATACTTTTAA	12.6	6.3e-07	-14278	6201		SM_b20896	SM_b21525							SMc01975	10	2699551	2700267	D	1234177	-	SMc01975	NP_386615.1	238	COG2186	K	transcriptional regulator	2519		SMc03123	6	3207160	3208107	D	1234647	-	SMc03123	NP_387076.1	315	COG2390	K	transcriptional regulator	2979
SM_b20129	D	SM_b20129_m1	D	-73	-59	CGTTAATACATAACA	11.3	1.7e-06	-13285	5770		SM_b20899	SM_b21533							SMc01563	10	2501869	2503923	R	1233981	sigA	SMc01563	NP_386420.1	684	COG0568	K	RNA polymerase sigma factor RpoD	2323		SMc03061	6	757756	759132	D	1232334	aglE	SMc03061	NP_384801.1	458	COG1653	G	alpha-glucoside ABC transporter periplasmic-binding protein	697
SMc00643	R	SM_b20129_m2	R	-148	-137	TTAACGCCTATA	9.0	7.9e-06	-11749	5102		SM_b20901	SM_b21559							SMc00879	10	907157	908011	D	1232468	-	SMc00879	NP_384933.1	284	COG1414	K	transcriptional regulator	829		SMc03060	6	756368	757438	R	1232333	aglR	SMc03060	NP_384800.1	356	COG1609	K	transcriptional regulator	696
SMa5007	R	SM_b20129_m2	R	-355	-344	TTAACGCGTTTC	10.5	3.0e-06	-12717	5523		SM_b20935	SM_b21569							SMc00766	10	778588	779463	D	1232349	-	SMc00766	NP_384816.1	291	COG0583	K	transcriptional regulator	712		SMc03015	6	714089	714826	D	1232286	-	SMc03015	NP_384753.1	245	COG2197	TK	transcriptional regulator	649
SM_b20129	D	SM_b20129_m2	D	-91	-80	TTTACGCGTTTA	14.2	2.0e-07	-15425	6699		SM_b20942	SM_b21576							SMc00107	10	1067701	1068414	R	1232617	-	SMc00107	NP_385080.1	237	COG2378	K	transcriptional regulator	977		SMc03004	6	702172	703773	D	1232275	mcpE	SMc03004	NP_384742.1	533	COG0840	NT	chemoreceptor (methyl-accepting chemotaxis protein)	638
SM_b21021	D	SM_b20129_m2	D	-73	-62	CTAACGCGTTGA	11.2	2.2e-06	-13027	5658		SM_b20946	SM_b21598							SM_b21569	10	1107381	1107980	R	1237340	-	SM_b21569	NP_437549.1	199	COG1917	R	transcriptional regulator (plasmid)	5658		SMc02781	6	11232	11828	R	1231638	-	SMc02781	NP_384119.1	198	COG0778	C	oxidoreductase	13
SM_b20129	D	SM_b20129_m3	D	-99	-87	GCCATACGTTTAC	15.7	1.9e-08	-17779	7721		SM_b20999	SM_b21601							SM_b21336	10	1002815	1003759	D	1237243	-	SM_b21336	NP_437452.1	314	COG2207	K	AraC family transcriptional regulator (plasmid)	5561		SMc02581	6	68916	71087	D	1231687	glcB	SMc02581	NP_384168.1	723	COG2225	C	malate synthase G	62
SM_b21102	R	SM_b20129_m3	R	-92	-80	TCCATAAATTTAT	9.2	6.8e-06	-11899	5167		SM_b21008	SM_b21641							SM_b21080	10	717545	718369	D	1236990	-	SM_b21080	NP_437199.1	274	COG2197	TK	response regulator protein (plasmid)	5312		SMc02392	6	1145231	1145497	D	1232691	-	SMc02392	NP_385154.1	88	COG0790	T	hypothetical protein SMc02392	1051
SMc01136	R	SM_b20129_m4	R	-57	-46	CACATATACATA	9.3	4.4e-06	-12334	5357		SM_b21009	SM_b21650							SM_b20859	10	1263877	1264827	D	1237483	-	SM_b20859	NP_437692.1	316	COG2207	K	AraC family transcriptional regulator (plasmid)	5801		SMc02163	6	530745	532370	R	1232118	pgi	SMc02163	NP_384589.1	541	COG0166	G	glucose-6-phosphate isomerase	484
SM_b21346	D	SM_b20129_m4	D	-111	-100	CACATGCACAAA	9.4	4.2e-06	-12380	5377		SM_b21010	SM_b21706							SM_b20285	10	289741	290718	R	1236606	-	SM_b20285	NP_436815.1	325	COG0583	K	transcriptional regulator (plasmid)	4926		SMc01945	6	2667667	2668083	D	1234147	-	SMc01945	NP_386585.1	138	COG1846	K	transcriptional regulator	2489
SMc00604	D	SM_b20129_m5	D	-229	-212	CTATAGTATATCTTTCGT	15.5	2.3e-08	-17588	7638		SM_b21021	SMc00058							SM_b20048	10	59484	60191	D	1236342	-	SM_b20048	NP_436591.1	235	COG2188	K	transcriptional regulator (plasmid)	4700		SMc01909	6	1371000	1372292	D	1232906	-	SMc01909	NP_385367.1	430	COG0420	L	hypothetical protein SMc01909	1266
SM_b20129	D	SM_b20129_m5	D	-372	-355	AGATATATATTGTTTCGG	15.5	2.3e-08	-17588	7638		SM_b21035	SMc00098							SM_b20021	10	29540	30010	D	1236437	-	SM_b20021	NP_436564.1	156	COG1522	K	transcriptional regulator (plasmid)	4673		SMc01908	6	1370272	1370745	R	1232905	-	SMc01908	NP_385366.1	157	COG1846	K	transcriptional regulator	1265
SMc00786	D	SM_b20154_m1	D	-127	-116	AAAATTCCAAAG	11.2	1.7e-06	-13285	5770		SM_b21079	SMc00107							SMa2303	10	1283423	1284649	R	1236277	-	SMa2303	NP_436486.1	408	COG1940	KG	ROK family transcriptional regulator (plasmid)	4593		SMc01871	6	2338502	2339428	R	1233837	ddl	SMc01871	NP_386277.1	308	COG1181	MR	D-alanine--D-alanine ligase	2180
SMc03104	R	SM_b20154_m1	R	-247	-236	ACCATTCCAAAA	10.0	9.8e-06	-11533	5009		SM_b21080	SMc00109							SMa2107	10	1189053	1189958	R	1236185	-	SMa2107	NP_436395.1	301	COG0583	K	GstR transcriptional regulator (plasmid)	4508		SMc01852	6	2361151	2362365	D	1233856	pfk	SMc01852	NP_386296.1	404	COG0205	G	pyrophosphate--fructose-6-phosphate 1-phosphotransferase	2199
SM_b20387	R	SM_b20154_m1	R	-21	-10	AAAATTCCACAA	10.0	9.8e-06	-11533	5009		SM_b21093	SMc00146							SMa1987	10	1127616	1128455	D	1236125	-	SMa1987	NP_436335.1	279	COG0583	K	LysR family transcriptional regulator (plasmid)	4448		SMc01719	6	483128	485125	D	1232081	mcpT	SMc01719	NP_384553.1	665	COG0840	NT	chemoreceptor methyl-accepting chemotaxis transmembrane protein	448
SMa2379	R	SM_b20154_m2	R	-358	-345	TGAACACGTGCGCT	9.9	2.3e-06	-12983	5638		SM_b21102	SMc00163							SMa1954	10	1109860	1110843	D	1236106	-	SMa1954	NP_436316.1	327	COG0583	K	LysR family transcriptional regulator (plasmid)	4429		SMc01588	6	2387441	2388826	R	1233878	-	SMc01588	NP_386318.1	461	COG1012	C	aldehyde dehydrogenase	2221
SM_b20154	R	SM_b20154_m2	R	-231	-218	TGCTCACGTGTGCA	16.9	8.1e-09	-18631	8092		SM_b21115	SMc00182							SMa0557	10	295587	296474	R	1235110	-	SMa0557	NP_435536.1	295	COG0583	K	LysR family transcriptional regulator (plasmid)	3652		SMc01569	6	2511829	2513034	D	1233987	carA	SMc01569	NP_386426.1	401	COG0505	EF	carbamoyl phosphate synthase small subunit	2329
SM_b20154	R	SM_b20154_m2	R	-179	-166	TGAACACGTGTGCG	15.3	3.5e-08	-17168	7456		SM_b21117	SMc00241							SMa0281	10	158400	158804	D	1235376	-	SMa0281	NP_435397.1	134	COG0789	K	MerR family transcriptional regulator (plasmid)	3514		SMc01563	6	2501869	2503923	R	1233981	sigA	SMc01563	NP_386420.1	684	COG0568	K	RNA polymerase sigma factor RpoD	2323
SM_b20154	R	SM_b20154_m3	R	-234	-218	TGCTCACGTGTGCATTT	19.8	2.3e-10	-22193	9638		SM_b21158	SMc00256							SMa0063	10	33453	34187	D	1235255	-	SMa0063	NP_435276.2	244	COG2186	K	GntR family transcriptional regulator (plasmid)	3391		SMc01428	6	2272581	2272790	R	1233777	cspA2	SMc01428	NP_386217.1	69	COG1278	K	cold shock transcription regulator protein	2119
SM_b20154	R	SM_b20154_m3	R	-182	-166	TGAACACGTGTGCGTAT	17.9	3.0e-09	-19625	8523		SM_b21169	SMc00275							SMc04264	9	2094373	2095263	D	1233599	-	SMc04264	NP_386040.1	296	COG2207	K	transcriptional regulator	1941		SMc01327	6	1455416	1456291	R	1232987	-	SMc01327	NP_385444.1	291	COG0566	J	tRNA/rRNA methyltransferase	1343
SMc01165	R	SM_b20154_m4	R	-116	-97	TATGGAATTTCCATTCTATA	13.4	2.1e-07	-15376	6678		SM_b21177	SMc00283							SMc04162	9	2151826	2152155	R	1233656	-	SMc04162	NP_386097.1	109	COG0640	K	transcriptional regulator	1999		SMc01294	6	1486042	1486575	D	1233023	rplF	SMc01294	NP_385477.1	177	COG0097	J	50S ribosomal protein L6	1376
SMc01165	R	SM_b20154_m4	R	-86	-67	TATGAAACATAAATTCCGTT	13.1	2.8e-07	-15088	6553		SM_b21180	SMc00380							SMc03258	9	3373376	3374068	R	1234797	-	SMc03258	NP_387217.1	230	COG1802	K	transcriptional regulator	3122		SMc01231	6	1691298	1694093	D	1233214	gyrA	SMc01231	NP_385666.1	931	COG0188	L	DNA gyrase subunit A	1565
SMc01164	R	SM_b20154_m4	R	-84	-65	GATAGAACGGATGTTCCATT	9.8	4.3e-06	-12357	5367		SM_b21181	SMc00458							SMc02647	9	1173182	1173595	R	1232721	-	SMc02647	NP_385183.1	137	COG0640	K	transcriptional regulator	1081		SMc00916	6	866620	867363	D	1232430	gst11	SMc00916	NP_384895.1	247	COG0625	O	glutathione S-transferase	791
SMc01163	R	SM_b20154_m4	R	-91	-72	TATGGAATATTTGTTCGAAA	16.2	7.4e-09	-18722	8131		SM_b21183	SMc00479							SMc02596	9	93287	94138	D	1231708	-	SMc02596	NP_384183.1	283	COG0583	K	transcriptional regulator	77		SMc00830	6	851078	852346	D	1232416	-	SMc00830	NP_384881.1	422	COG4949	S	hypothetical protein SMc00830	777
SM_b20072	R	SM_b20154_m4	R	-63	-44	AATGGAATACAAGTTCTAAG	11.3	1.4e-06	-13479	5854		SM_b21186	SMc00490							SMc02184	9	546632	546901	D	1232131	-	SMc02184	NP_384602.1	89	COG1396	K	transcriptional regulator	497		SMc00829	6	850072	850899	R	1232415	-	SMc00829	NP_384880.1	275	COG2186	K	transcriptional regulator	776
SM_b20154	R	SM_b20154_m4	R	-309	-290	TTTGGAATTTTTATTCCGCC	15.1	3.2e-08	-17258	7495		SM_b21187	SMc00558							SMc02022	9	2725662	2726654	R	1234202	-	SMc02022	NP_386640.1	330	COG1879	G	transcriptional regulator	2544		SMc00786	6	807487	809082	D	1232371	dppA1	SMc00786	NP_384837.1	531	COG0747	E	periplasmic dipeptide-binding protein	733
SM_b20899	D	SM_b20154_m4	D	-143	-124	ATTGGAATAAATATTCCGTG	14.9	4.6e-08	-16895	7337		SM_b21196	SMc00646							SMc01592	9	2524388	2524864	D	1234003	-	SMc01592	NP_386442.1	158	COG1846	K	transcriptional regulator	2345		SMc00698	6	2881681	2881962	D	1234349	-	SMc00698	NP_386780.1	93	COG0271	T	transcriptional regulator	2684
SM_b20712	D	SM_b20154_m4	D	-170	-151	AATGGAATACATATTCCGTA	16.2	7.4e-09	-18722	8131		SM_b21197	SMc00654							SMc01092	9	466650	467540	D	1232063	-	SMc01092	NP_384535.1	296	COG0583	K	transcriptional regulator	430		SMc00679	6	2896434	2897375	D	1234368	-	SMc00679	NP_386799.1	313	COG2207	K	transcriptional regulator	2702
SMc01908	R	SM_b20154_m5	R	-212	-196	ATTCAAGCATTCCGTGG	9.2	9.6e-06	-11554	5018		SM_b21208	SMc00679							SMc00878	9	908239	908979	D	1232469	-	SMc00878	NP_384934.1	246	COG2771	K	transcriptional regulator	830		SMc00655	6	2921179	2921529	R	1234393	-	SMc00655	NP_386823.1	116			hypothetical protein SMc00655	2726
SMc01909	D	SM_b20154_m5	D	-63	-47	ATTCAAGCATTCCGTGG	9.2	9.6e-06	-11554	5018		SM_b21210	SMc00698							SMc00256	9	1824818	1825825	R	1233344	-	SMc00256	NP_385790.1	335	COG4977	K	transcriptional regulator	1689		SMc00576	6	1246291	1247178	D	1232790	-	SMc00576	NP_385252.1	295	COG1561	S	hypothetical protein SMc00576	1150
SM_b20154	R	SM_b20154_m5	R	-279	-263	GATCATACGTTCCATAA	17.3	1.7e-10	-22495	9770		SM_b21222	SMc00766							SMc00109	9	1071584	1072051	R	1232622	-	SMc00109	NP_385085.1	155	COG0789	K	transcriptional regulator	982		SMc00528	6	1881411	1882088	D	1233402	-	SMc00528	NP_385843.1	225	COG2945	R	hypothetical protein SMc00528	1742
SMc04410	D	SM_b20162_m2	D	-100	-88	GCTCTCTCCCCGG	13.3	1.5e-07	-15713	6824		SM_b21270	SMc00780							SM_b21372	9	1036546	1037604	R	1237281	-	SM_b21372	NP_437490.1	352	COG1609	K	LacI family transcriptional regulator (plasmid)	5599		SMc00363	6	318504	318707	D	1231917	rpmI	SMc00363	NP_384389.1	67	COG0291	J	50S ribosomal protein L35	284
SM_b20033	R	SM_b20162_m2	R	-33	-21	GCTCTCCCTCAAG	9.7	9.1e-06	-11607	5041		SM_b21272	SMc00785							SM_b21008	9	1241735	1242067	R	1237465	-	SM_b21008	NP_437674.1	110	COG0640	K	ArsR family transcriptional regulator (plasmid)	5783		SMc00148	6	2021723	2022331	R	1233525	-	SMc00148	NP_385966.1	202	COG3576	R	hypothetical protein SMc00148	1866
SM_b21346	D	SM_b20162_m2	D	-220	-208	TCTCTCCTCCCGG	11.5	1.7e-06	-13285	5770		SM_b21299	SMc00794							SM_b20935	9	1160892	1161143	R	1237389	exsI	SM_b20935	NP_437598.1	83	COG1396	K	transcriptional regulator (plasmid)	5707		SMc00100	6	1058318	1059880	R	1232607	-	SMc00100	NP_385070.1	520	COG0433	L	hypothetical protein SMc00100	967
SMc00362	D	SM_b20162_m3	D	-124	-111	TCGAGGAGAGTACG	9.6	3.2e-06	-12652	5495		SM_b21317	SMc00820							SM_b20896	9	1304441	1305349	D	1237521	gbpR	SM_b20896	NP_437730.1	302	COG0583	K	LysR family transcriptional regulator (plasmid)	5839		SMc00059	6	1093568	1095145	D	1232645	-	SMc00059	NP_385108.1	525	COG2205	T	sensor histidine kinase	1005
SM_b20162	D	SM_b20162_m3	D	-102	-89	CTGGGGAGAGTACG	19.5	5.8e-10	-21268	9237		SM_b21336	SMc00829							SM_b20219	9	227578	228315	R	1236543	-	SM_b20219	NP_436752.1	245	COG0745	TK	response regulator protein (plasmid)	4862		SM_b21576	6	1115394	1115759	R	1237347	-	SM_b21576	NP_437556.1	121	COG0640	K	ArsR family transcriptional regulator (plasmid)	5665
SM_b20162	D	SM_b20162_m4	D	-195	-173	ATCTCGTGCGCGTATCGCCGACA	24.9	7.6e-14	-30208	13119		SM_b21346	SMc00831							SM_b20129	9	141805	142584	D	1236460	-	SM_b20129	NP_436669.1	259	COG1802	K	transcriptional regulator (plasmid)	4779		SM_b21115	6	756618	757106	R	1237025	-	SM_b21115	NP_437234.1	162	COG3707	TK	response regulator protein (plasmid)	5347
SM_b20162	D	SM_b20162_m5	D	-128	-116	ACTGTGCGACAAC	12.9	4.3e-07	-14659	6367		SM_b21359	SMc00877							SM_b20106	9	116824	117555	D	1236397	-	SM_b20106	NP_436646.1	243	COG2186	K	transcriptional regulator (plasmid)	4756		SM_b21093	6	735413	736315	R	1237003	-	SM_b21093	NP_437212.1	300	COG0583	K	LysR family transcriptional regulator (plasmid)	5325
SM_b20457	R	SM_b20162_m5	R	-84	-72	TCTGTCCCACACT	9.8	7.6e-06	-11787	5119		SM_b21372	SMc00878							SM_b20039	9	49146	50570	R	1236333	-	SM_b20039	NP_436582.1	474	COG1167	KE	transcriptional regulator (plasmid)	4691		SM_b21079	6	716513	717244	D	1236989	-	SM_b21079	NP_437198.1	243	COG0664	T	transcriptional regulator (plasmid)	5311
SMc02172	R	SM_b20203_m1	R	-237	-211	AATAATTCAATTTGATTTATTTATTGA	6.3	4.3e-06	-12357	5367		SM_b21419	SMc00879							SMa2287	9	1271938	1272870	R	1236268	-	SMa2287	NP_436477.2	310	COG0583	K	LysR family transcriptional regulator (plasmid)	4584		SM_b20683	6	1485370	1486269	R	1237722	-	SM_b20683	NP_437930.1	299	COG0583	K	LysR family transcriptional regulator (plasmid)	6039
SMc02172	R	SM_b20203_m1	R	-233	-207	AGATAATAATTCAATTTGATTTATTTA	14.9	1.7e-08	-17890	7770		SM_b21464	SMc00929							SMa2215	9	1240820	1241587	D	1236232	-	SMa2215	NP_436441.1	255	COG2188	K	GntR family transcriptional regulator (plasmid)	4553		SM_b20586	6	1601452	1602207	R	1237830	-	SM_b20586	NP_438038.1	251	COG1414	K	IclR family transcriptional regulator (plasmid)	6146
SMc04323	R	SM_b20203_m1	R	-71	-45	AATATTTAAGTCAATATTCCTGACCTA	7.9	1.8e-06	-13228	5745		SM_b21479	SMc00953							SMa1720	9	970632	971576	D	1235981	-	SMa1720	NP_436191.1	314	COG0583	K	LysR family transcriptional regulator (plasmid)	4307		SM_b20337	6	342776	343387	R	1236654	-	SM_b20337	NP_436863.1	203	COG1309	K	transcriptional regulator (plasmid)	4974
SMc04348	R	SM_b20203_m1	R	-221	-195	CCTACATTACGAAAATATAATGATCTC	6.2	4.8e-06	-12247	5319		SM_b21484	SMc01092							SMa1705	9	961799	962215	D	1235974	-	SMa1705	NP_436184.1	138	COG4957	K	MUCR family transcriptional regulatory protein IN SYRB 5\'region (plasmid)	4301		SM_b20072	6	81239	82168	R	1236363	-	SM_b20072	NP_436612.1	309	COG1879	G	rhizopine binding protein (plasmid)	4722
SMc00638	R	SM_b20203_m1	R	-133	-107	ATTAACTACAAAAATTTACCTTGAATA	6.5	3.9e-06	-12455	5409		SM_b21491	SMc01139							SMa0955	9	534018	534710	D	1235553	atrA	SMa0955	NP_435763.1	230	COG1802	K	GntR family transcriptional regulator (plasmid)	3881		SM_b20039	6	49146	50570	R	1236333	-	SM_b20039	NP_436582.1	474	COG1167	KE	transcriptional regulator (plasmid)	4691
SMc03131	R	SM_b20203_m1	R	-164	-138	ACTGAATTAGTAAATCCTACTGACGCG	6.0	5.1e-06	-12186	5292		SM_b21493	SMc01168							SMa0319	9	177973	178974	D	1235397	-	SMa0319	NP_435418.1	333	COG4977	K	AraC family transcriptional regulator (plasmid)	3534		SM_b20033	6	43775	44437	R	1236449	-	SM_b20033	NP_436576.1	220	COG1309	K	transcriptional regulator (plasmid)	4685
SM_b20203	D	SM_b20203_m1	D	-34	-8	ACTTCATAAGTTAAATTTCCTTACTTT	25.8	2.1e-13	-29192	12678		SM_b21494	SMc01223							SMc03140	8	3190546	3191277	R	1234630	-	SMc03140	NP_387059.1	243	COG2188	K	transcriptional regulator	2962		SMa2379	6	1342282	1344465	R	1236323	katB	SMa2379	NP_436532.1	727	COG0376	P	KatB catalase/peroxidase (plasmid)	4641
SM_b20263	D	SM_b20203_m1	D	-99	-73	GTATACTAATTGTATTTTTAAATTGAT	4.8	9.7e-06	-11543	5013		SM_b21514	SMc01225							SMc02851	8	201956	202399	D	1231807	-	SMc02851	NP_384282.1	147	COG1846	K	transcriptional regulator	176		SMa1587	6	880620	882017	D	1235900	eglC	SMa1587	NP_436110.1	465	COG2273	G	EglC endo-1,3-1,4-BETA-glycanase (plasmid)	4228
SM_b21080	D	SM_b20203_m1	D	-171	-145	AAATAATGTTTTATATTAACTTATGTT	7.9	1.8e-06	-13228	5745		SM_b21523	SMc01260							SMc02844	8	193777	194370	R	1231800	-	SMc02844	NP_384275.1	197	COG1309	K	transcriptional regulator	169		SMa0955	6	534018	534710	D	1235553	atrA	SMa0955	NP_435763.1	230	COG1802	K	GntR family transcriptional regulator (plasmid)	3881
SM_b21222	D	SM_b20203_m1	D	-70	-44	TCTTATTAAGTCAATTGTCTTGACTTA	9.0	9.8e-07	-13836	6009		SM_b21525	SMc01269							SMc02777	8	15706	16584	R	1231642	-	SMc02777	NP_384123.1	292	COG1802	K	transcriptional regulator	17		SMa0372	6	199105	200004	R	1235425	-	SMa0372	NP_435446.1	299	COG0583	K	LysR family transcriptional regulator (plasmid)	3561
SMc00820	R	SM_b20203_m2	R	-73	-63	AATAAGGATTT	10.2	5.1e-06	-12186	5292		SM_b21533	SMc01330							SMc01651	8	2448176	2449084	D	1233929	-	SMc01651	NP_386369.1	302	COG0583	K	transcriptional regulator	2272		SMa0179	6	98400	99317	R	1235319	-	SMa0179	NP_435340.1	305	COG0583	K	LysR family transcriptional regulator (plasmid)	3457
SMc00821	D	SM_b20203_m2	D	-152	-142	AATAAGGATTT	10.2	5.1e-06	-12186	5292		SM_b21559	SMc01403							SMc01330	8	1453264	1454205	R	1232984	-	SMc01330	NP_385441.1	313	COG0583	K	transcriptional regulator	1340		SMa0101	6	51262	52887	D	1235275	-	SMa0101	NP_435296.1	541	COG1574	R	amidohydrolase (plasmid)	3411
SMc01777	D	SM_b20203_m2	D	-189	-179	CTTAAGGATTA	10.0	5.9e-06	-12041	5229		SM_b21569	SMc01406							SMc01168	8	1761019	1761480	D	1233283	-	SMc01168	NP_385731.1	153	COG1522	K	transcriptional regulator	1630		SMa0097	6	50138	51079	R	1235274	-	SMa0097	NP_435295.1	313	COG0583	K	LysR family transcriptional regulator (plasmid)	3410
SMc01871	R	SM_b20203_m3	R	-244	-229	GGGAAATAATCTTAGG	11.1	2.4e-06	-12940	5620		SM_b21576	SMc01495							SMc01139	8	411264	412808	R	1232015	rpoN	SMc01139	NP_384487.1	514	COG1508	K	RNA polymerase factor sigma-54	382		SMa0078	6	40959	41981	D	1235263	-	SMa0078	NP_435284.1	340	COG1609	K	LacI family transcriptional regulator (plasmid)	3399
SM_b21180	R	SM_b20203_m3	R	-33	-18	GAAAATGTACTTTATG	10.6	4.0e-06	-12429	5398		SM_b21598	SMc01504							SMc00780	8	800319	801200	R	1232365	-	SMc00780	NP_384831.1	293	COG0583	K	transcriptional regulator	727		SMc04315	5	2133224	2134072	D	1233635	-	SMc04315	NP_386076.1	282	COG0583	K	transcriptional regulator	1977
SM_b21181	D	SM_b20203_m3	D	-174	-159	GAAAATGTACTTTATG	10.6	4.0e-06	-12429	5398		SM_b21600	SMc01563							SM_b21158	8	901638	902501	D	1237155	-	SM_b21158	NP_437364.1	287	COG1737	K	transcriptional regulator (plasmid)	5475		SMc04175	5	2164568	2165209	D	1233669	-	SMc04175	NP_386110.1	213	COG0861	P	transmembrane protein	2012
SMc02172	R	SM_b20203_m4	R	-233	-209	ATAATAATTCAATTTGATTTATTTA	14.4	1.2e-08	-18238	7921		SM_b21601	SMc01570							SM_b21117	8	758135	758593	R	1237027	-	SM_b21117	NP_437236.1	152	COG1396	K	transcriptional regulator (plasmid)	5349		SMc04163	5	2152254	2153150	R	1233657	-	SMc04163	NP_386098.1	298	COG0583	K	transcriptional regulator	2000
SMc04348	R	SM_b20203_m4	R	-221	-197	TACATTACGAAAATATAATGATCTC	3.5	6.1e-06	-12007	5215		SM_b21641	SMc01592							SM_b21093	8	735413	736315	R	1237003	-	SM_b21093	NP_437212.1	300	COG0583	K	LysR family transcriptional regulator (plasmid)	5325		SMc03899	5	3568183	3568434	R	1234976	-	SMc03899	NP_387388.1	83			hypothetical protein SMc03899	3300
SMc03131	R	SM_b20203_m4	R	-164	-140	TGAATTAGTAAATCCTACTGACGCG	4.2	4.3e-06	-12357	5367		SM_b21650	SMc01593							SM_b21079	8	716513	717244	D	1236989	-	SM_b21079	NP_437198.1	243	COG0664	T	transcriptional regulator (plasmid)	5311		SMc03891	5	3558751	3559524	D	1234968	-	SMc03891	NP_387380.1	257	COG0834	ET	amino acid-binding periplasmic ABC transporter protein	3292
SMa2215	D	SM_b20203_m4	D	-150	-126	AAAACAAGTAAAATGCCTAAAATAT	3.1	7.3e-06	-11828	5137		SM_b21706	SMc01610							SM_b20817	8	605893	606924	R	1236888	-	SM_b20817	NP_437097.1	343	COG1879	G	LacI family transcriptional regulator (plasmid)	5210		SMc03890	5	3557698	3558480	R	1234967	-	SMc03890	NP_387379.1	260	COG1349	KG	transcriptional regulator	3291
SM_b20203	D	SM_b20203_m4	D	-59	-35	GGAGTTTGTAAAATTTATTCATTTG	4.8	3.1e-06	-12684	5509		SMc00009	SMc01615							SM_b20586	8	1601452	1602207	R	1237830	-	SM_b20586	NP_438038.1	251	COG1414	K	IclR family transcriptional regulator (plasmid)	6146		SMc03862	5	3526182	3526928	R	1234939	-	SMc03862	NP_387351.1	248	COG0730	S	hypothetical protein SMc03862	3263
SM_b20203	D	SM_b20203_m4	D	-32	-8	TTCATAAGTTAAATTTCCTTACTTT	25.3	8.6e-13	-27782	12066		SMc00013	SMc01630							SMa1948	8	1105815	1106531	D	1236102	-	SMa1948	NP_436312.1	238	COG0664	T	Crp family transcriptional regulator (plasmid)	4425		SMc03165	5	3124767	3125804	R	1234573	-	SMc03165	NP_387002.1	345	COG1879	G	transcriptional regulator	2905
SM_b21080	D	SM_b20203_m4	D	-169	-145	ATAATGTTTTATATTAACTTATGTT	11.6	7.3e-08	-16433	7137		SMc00017	SMc01651							SMa1387	8	764198	765112	D	1235796	-	SMa1387	NP_436006.1	304	COG0583	K	LysR family transcriptional regulator (plasmid)	4123		SMc03104	5	3237290	3238507	R	1234673	hemA	SMc03104	NP_387095.1	405	COG0156	H	5-aminolevulinate synthase	2998
SM_b21222	D	SM_b20203_m4	D	-68	-44	TTATTAAGTCAATTGTCTTGACTTA	6.2	1.5e-06	-13410	5824		SMc00023	SMc01664							SMa0520	8	280693	281535	D	1235094	-	SMa0520	NP_435520.1	280	COG1737	K	RpiR family transcriptional regulator (plasmid)	3635		SMc02851	5	201956	202399	D	1231807	-	SMc02851	NP_384282.1	147	COG1846	K	transcriptional regulator	176
SMc00109	R	SM_b20203_m5	R	-198	-173	AATATTCAAAATCAATAATTTAGCTA	3.0	8.2e-06	-11711	5086		SMc00033	SMc01762							SMa0246	8	136409	137119	D	1235355	-	SMa0246	NP_435376.2	236	COG2186	K	GntR family transcriptional regulator (plasmid)	3493		SMc02438	5	2822611	2823885	R	1234287	lysC	SMc02438	NP_386719.1	424	COG0527	E	aspartate kinase	2623
SM_b20203	D	SM_b20203_m5	D	-56	-31	GTTTGTAAAATTTATTCATTTGACTT	8.6	4.5e-07	-14614	6347		SMc00034	SMc01768							SMa0114	8	62292	62654	D	1235283	-	SMa0114	NP_435304.1	120	COG0784	T	two-component response regulator (plasmid)	3420		SMc02429	5	2801505	2802413	R	1234272	-	SMc02429	NP_386710.2	302	COG0583	K	transcriptional regulator	2614
SMc00785	D	SM_b20211_m1	D	-82	-64	TTTTCCACTTTTTGGAATT	9.5	8.7e-06	-11652	5060		SMc00036	SMc01787							SMc04169	7	2157476	2158480	D	1233663	-	SMc04169	NP_386104.1	334	COG4977	K	transcriptional regulator	2006		SMc02184	5	546632	546901	D	1232131	-	SMc02184	NP_384602.1	89	COG1396	K	transcriptional regulator	497
SMc00794	R	SM_b20211_m1	R	-102	-84	TATTCCGGTTTATGGAAAG	9.4	9.4e-06	-11575	5027		SMc00040	SMc01819							SMc03843	7	3508582	3508896	R	1234920	-	SMc03843	NP_387332.1	104	COG0640	K	transcriptional regulator	3244		SMc02175	5	520434	521138	R	1232107	-	SMc02175	NP_384578.1	234	COG0664	T	transcriptional regulator	473
SMc01309	D	SM_b20211_m1	D	-73	-55	GCTTCCAGGAACAGGAAAC	9.6	8.7e-06	-11652	5060		SMc00058	SMc01908							SMc02235	7	599523	599759	D	1232176	-	SMc02235	NP_384645.1	78	COG1522	K	transcriptional regulator	540		SMc02174	5	521374	521811	D	1232108	-	SMc02174	NP_384579.1	145	COG2259	S	hypothetical protein SMc02174	474
SMc00964	R	SM_b20211_m2	R	-27	-5	AGTCCTACCTCTTATTAGAAAGC	11.8	6.8e-07	-14201	6167		SMc00059	SMc01945							SMc01819	7	2642750	2643391	R	1234119	-	SMc01819	NP_386558.1	213	COG1309	K	transcriptional regulator	2462		SMc02094	5	1614335	1616665	D	1233155	omp	SMc02094	NP_385608.1	776	COG4775	M	outer membrane transmembrane protein	1507
SMa2015	R	SM_b20211_m2	R	-57	-35	TATCCCACTTATCTGTGCAATGG	10.1	5.7e-06	-12075	5244		SMc00067	SMc01974							SMc00953	7	1780439	1781368	R	1233304	-	SMc00953	NP_385751.1	309	COG2207	K	transcriptional regulator	1650		SMc01974	5	2698596	2699288	D	1234176	-	SMc01974	NP_386614.1	230	COG1802	K	transcriptional regulator	2518
SMc04115	R	SM_b20211_m4	R	-253	-238	TTTGAGGAGAATAGTC	9.3	6.7e-06	-11913	5174		SMc00070	SMc01975							SMc00146	7	2023390	2023881	D	1233527	-	SMc00146	NP_385968.1	163	COG1846	K	transcriptional regulator	1868		SMc01904	5	1363000	1364277	D	1232901	clpX	SMc01904	NP_385362.1	425	COG1219	O	ATP-dependent protease ATP-binding subunit ClpX	1261
SMc01428	R	SM_b20211_m4	R	-199	-184	TTTCGGGAGAAGACTA	12.0	6.4e-07	-14262	6194		SMc00088	SMc02022							SM_b21706	7	1655215	1656018	R	1237879	-	SM_b21706	NP_438087.1	267	COG1609	K	LacI family transcriptional regulator (plasmid)	6195		SMc01903	5	1362080	1362706	D	1232900	clpP	SMc01903	NP_385361.1	208	COG0740	O	ATP-dependent Clp protease proteolytic subunit	1260
SMa1698	R	SM_b20211_m4	R	-48	-33	TTTCGGCTGAGTGCTC	11.1	1.5e-06	-13410	5824		SMc00098	SMc02030							SM_b21601	7	1142033	1142953	R	1237372	-	SM_b21601	NP_437581.1	306	COG4189	K	ArsR family transcriptional regulator (plasmid)	5690		SMc01876	5	2331884	2332750	R	1233832	-	SMc01876	NP_386272.1	288	COG4105	M	hypothetical protein SMc01876	2175
SMc02172	R	SM_b20215_m1	R	-317	-306	GGGTCCTGAAGC	10.2	6.2e-06	-11991	5208		SMc00100	SMc02140							SM_b21533	7	1059672	1060457	D	1237304	-	SM_b21533	NP_437513.1	261	COG1349	KG	GntR family transcriptional regulator (plasmid)	5622		SMc01615	5	2405599	2406384	R	1233893	-	SMc01615	NP_386333.1	261	COG1349	KG	transcriptional regulator	2236
SMc02147	D	SM_b20215_m1	D	-153	-142	ATGTCGTGAAAA	9.9	9.4e-06	-11575	5027		SMc00105	SMc02172							SM_b21210	7	963136	963807	R	1237207	-	SM_b21210	NP_437416.1	223	COG0745	TK	two-component response regulator protein (plasmid)	5525		SMc01585	5	2520992	2521207	D	1233997	cspA3	SMc01585	NP_386436.1	71	COG1278	K	cold shock transcription regulator protein	2339
SM_b20215	D	SM_b20215_m1	D	-46	-35	GGGTCGAGAAGT	11.4	5.1e-07	-14489	6292		SMc00107	SMc02175							SM_b20455	7	467358	467972	R	1236768	-	SM_b20455	NP_436977.1	204	COG1309	K	transcriptional regulator (plasmid)	5088		SMc01431	5	2274751	2276529	R	1233780	ilvI	SMc01431	NP_386220.1	592	COG0028	EH	acetolactate synthase 3 catalytic subunit	2122
SM_b21641	R	SM_b20215_m1	R	-95	-84	CCGTCGTGAAGT	9.9	9.4e-06	-11575	5027		SMc00109	SMc02184							SM_b20426	7	440994	442274	D	1236743	-	SM_b20426	NP_436952.1	426	COG1167	KE	transcriptional regulator (plasmid)	5063		SMc01403	5	2244554	2245018	R	1233746	-	SMc01403	NP_386186.1	154	COG1522	K	transcriptional regulator	2088
SM_b20215	D	SM_b20215_m2	D	-64	-40	CGCTGCCCATACTGTGGCGGGTCGA	25.0	8.4e-16	-34713	15076		SMc00120	SMc02223							SM_b20392	7	405680	406387	R	1236709	-	SM_b20392	NP_436918.1	235	COG2186	K	transcriptional regulator NanR (plasmid)	5029		SMc01235	5	1686585	1689506	R	1233211	uvrA	SMc01235	NP_385663.1	973	COG0178	L	excinuclease ABC subunit A	1562
SM_b20808	R	SM_b20215_m2	R	-64	-40	ACCTGTCCATTCGCCGCCGGGTCTT	8.6	8.5e-06	-11675	5071		SMc00140	SMc02235							SM_b20387	7	398867	399586	R	1236704	-	SM_b20387	NP_436913.1	239	COG1414	K	transcriptional regulator (plasmid)	5024		SMc01169	5	1759743	1760861	R	1233282	ald	SMc01169	NP_385730.1	372	COG0686	E	alanine dehydrogenase oxidoreductase	1629
SM_b20215	D	SM_b20215_m3	D	-40	-27	AGAAGTCCGTGTAG	16.3	1.3e-09	-20461	8886		SMc00146	SMc02323							SM_b20367	7	379530	380222	R	1236684	-	SM_b20367	NP_436893.1	230	COG1309	K	transcriptional regulator (plasmid)	5004		SMc01168	5	1761019	1761480	D	1233283	-	SMc01168	NP_385731.1	153	COG1522	K	transcriptional regulator	1630
SM_b21102	R	SM_b20215_m3	R	-154	-141	AGAAGGGCGTGTTC	10.2	5.0e-06	-12206	5301		SMc00148	SMc02340							SM_b20366	7	378030	379034	D	1236683	-	SM_b20366	NP_436892.1	334	COG1609	K	LacI family transcriptional regulator (plasmid)	5003		SMc01092	5	466650	467540	D	1232063	-	SMc01092	NP_384535.1	296	COG0583	K	transcriptional regulator	430
SM_b21359	D	SM_b20215_m3	D	-94	-81	AAAAGCCCATGTCC	9.8	7.3e-06	-11828	5137		SMc00149	SMc02366							SM_b20276	7	280415	281305	D	1236597	-	SM_b20276	NP_436806.1	296	COG1737	K	transcriptional regulator (plasmid)	4917		SMc00987	5	948018	948584	R	1232506	-	SMc00987	NP_384971.1	188			hypothetical protein SMc00987	867
SMc04405	D	SM_b20215_m4	D	-127	-116	TCCGTCAAGCGG	11.7	1.4e-06	-13479	5854		SMc00150	SMc02425							SMa2163	7	1218608	1219489	D	1236211	-	SMa2163	NP_436421.2	293	COG4977	K	AraC family transcriptional regulator (plasmid)	4533		SMc00983	5	953846	954439	R	1232510	-	SMc00983	NP_384975.1	197			hypothetical protein SMc00983	871
SM_b20215	D	SM_b20215_m4	D	-35	-24	TCCGTGTAGCGG	13.5	4.8e-08	-16852	7319		SMc00155	SMc02429							SMa2049	7	1158529	1159611	D	1236156	-	SMa2049	NP_436366.1	360	COG1879	G	LacI family transcriptional regulator (plasmid)	4479		SMc00879	5	907157	908011	D	1232468	-	SMc00879	NP_384933.1	284	COG1414	K	transcriptional regulator	829
SMc00009	D	SM_b20215_m5	D	-299	-280	CCCTCCCGGTACGAAATCGG	9.8	7.7e-06	-11774	5114		SMc00159	SMc02470							SMa2015	7	1141886	1142407	R	1236140	-	SMa2015	NP_436350.1	173	COG0583	K	transcriptional regulator (plasmid)	4462		SMc00720	5	2861678	2862037	R	1234327	-	SMc00720	NP_386758.1	119	COG2204	T	2-component receiver domain-containing protein	2662
SMa1893	D	SM_b20215_m5	D	-55	-36	GTCTCGCTTGCCGAGATCAT	10.6	3.6e-06	-12535	5444		SMc00163	SMc02504							SMa1893	7	1075895	1076770	D	1236077	-	SMa1893	NP_436287.1	291	COG0583	K	LysR family transcriptional regulator (plasmid)	4400		SMc00704	5	2875439	2875729	D	1234343	rpmB	SMc00704	NP_386774.1	96	COG0227	J	50S ribosomal protein L28	2678
SMa2027	R	SM_b20215_m5	R	-126	-107	GTCTCCCGTGAACCCATCGC	9.6	9.3e-06	-11585	5032		SMc00174	SMc02523							SMa0849	7	466418	467398	D	1235498	syrM	SMa0849	NP_435708.1	326	COG0583	K	SyrM transcriptional regulator (plasmid)	3825		SMc00572	5	1241639	1242376	D	1232786	fabG	SMc00572	NP_385248.1	245	COG1028	IQR	3-ketoacyl-ACP reductase	1146
SM_b20215	D	SM_b20215_m5	D	-20	-1	ATCTCCTGCGCGAATATCGT	10.0	6.4e-06	-11959	5194		SMc00176	SMc02560							SMa0179	7	98400	99317	R	1235319	-	SMa0179	NP_435340.1	305	COG0583	K	LysR family transcriptional regulator (plasmid)	3457		SMc00488	5	1921045	1923276	D	1233444	purL	SMc00488	NP_385885.1	743	COG0046	F	phosphoribosylformylglycinamidine synthase II	1785
SMc02438	R	SM_b20219_m1	R	-22	-11	TACCGTAACAAC	10.9	5.9e-08	-16646	7229		SMc00182	SMc02584							SMc04882	6	3582240	3583133	R	1234981	-	SMc04882	NP_387393.1	297	COG0583	K	transcriptional regulator	3305		SMc00409	5	360166	360327	R	1231963	-	SMc00409	NP_384435.1	53			signal peptide protein	330
SMc04405	D	SM_b20219_m1	D	-106	-95	AGCCGTGACACA	9.7	7.1e-06	-11855	5149		SMc00191	SMc02596							SMc03210	6	3174933	3175412	R	1234618	-	SMc03210	NP_387047.1	159	COG1522	K	transcriptional regulator	2950		SMc00380	5	333980	334474	R	1231934	-	SMc00380	NP_384406.1	164	COG1846	K	transcriptional regulator	301
SM_b20219	R	SM_b20219_m1	R	-57	-46	TGCCGTGACAGC	10.1	2.4e-06	-12940	5620		SMc00234	SMc02647							SMc02888	6	243152	244174	R	1231845	-	SMc02888	NP_384319.1	340	COG2207	K	transcriptional regulator	214		SMc00362	5	317832	318263	D	1231916	infC	SMc00362	NP_384388.1	143	COG0290	J	translation initiation factor IF-3	283
SM_b20219	R	SM_b20219_m2	R	-75	-46	TGCCGTGACAGCAGTATTCATCGGCTCGTG	18.5	9.4e-11	-23088	10027		SMc00235	SMc02777							SMc01664	6	2466631	2467476	D	1233942	-	SMc01664	NP_386382.1	281	COG0583	K	transcriptional regulator	2285		SMc00191	5	1964715	1965083	R	1233480	-	SMc00191	NP_385921.1	122	COG2198	T	hypothetical protein SMc00191	1821
SMc02884	R	SM_b20219_m3	R	-95	-74	ACCCGCCCCTCTCTTTAAGGCT	10.9	1.7e-06	-13285	5770		SMc00241	SMc02844							SMc01630	6	2422399	2423202	R	1233908	-	SMc01630	NP_386348.1	267	COG2197	TK	transcriptional regulator	2251		SMc00176	5	1986348	1987724	R	1233496	-	SMc00176	NP_385937.1	458	COG1463	M	hypothetical protein SMc00176	1837
SMc01136	R	SM_b20219_m3	R	-202	-181	TGCCGCGTCAAACCCCAAGGGG	10.1	6.3e-06	-11975	5201		SMc00256	SMc02851							SMc01495	6	2634580	2635533	R	1234113	smoC	SMc01495	NP_386552.1	317	COG2390	K	transcriptional regulator	2456		SMc00150	5	2017892	2019787	R	1233523	-	SMc00150	NP_385964.1	631	COG2989	M	hypothetical protein SMc00150	1864
SM_b21117	R	SM_b20219_m3	R	-172	-151	TGCCGCACCAGGGGGCAAGGTG	10.3	4.6e-06	-12289	5337		SMc00275	SMc02866							SMc01223	6	1701567	1702037	D	1233222	-	SMc01223	NP_385674.1	156	COG1522	K	transcriptional regulator	1573		SMc00149	5	2020255	2021676	D	1233524	fumC	SMc00149	NP_385965.3	473	COG0114	C	fumarate hydratase	1865
SMc03899	R	SM_b20219_m4	R	-259	-244	GAACGCAAAGGCCGTC	11.1	2.5e-06	-12899	5602		SMc00283	SMc02888							SMc00182	6	1981371	1981856	D	1233489	-	SMc00182	NP_385930.1	161	COG0789	K	transcriptional regulator	1830		SMc00140	5	2030538	2031320	D	1233535	-	SMc00140	NP_385976.1	260	COG0834	ET	amino-acid binding periplasmic protein	1876
SM_b20219	R	SM_b20219_m4	R	-52	-37	GAACGAGAATGCCGTG	11.7	1.3e-06	-13553	5886		SMc00289	SMc02893							SM_b21464	6	1391174	1391947	D	1237622	-	SM_b21464	NP_437830.1	257	COG2188	K	GntR family transcriptional regulator (plasmid)	5939		SMc00120	5	1096742	1097797	R	1232648	-	SMc00120	NP_385111.2	351	COG5330	S	hypothetical protein SMc00120	1008
SMc01588	R	SM_b20219_m5	R	-82	-53	CCCACAAGGGAGGGGCTAGTCGAGGCACCC	9.1	1.5e-06	-13410	5824		SMc00293	SMc02976							SM_b21419	6	1349044	1349931	R	1237578	-	SM_b21419	NP_437786.1	295	COG0662	G	AraC family transcriptional regulator (plasmid)	5895		SMc00033	5	1045735	1047534	D	1232595	-	SMc00033	NP_385058.1	599	COG0517	T	hypothetical protein SMc00033	955
SMc02425	R	SM_b20258_m1	R	-94	-77	AATATTGTCTACAATATG	11.5	1.1e-06	-13720	5959		SMc00300	SMc02984							SM_b21299	6	880615	881406	D	1237134	deoR	SM_b21299	NP_437343.1	263	COG1349	KG	DeoR family transcriptional regulator (plasmid)	5454		SMc00009	5	992038	992922	D	1232545	ctaC	SMc00009	NP_385010.1	294	COG1622	C	cytochrome C oxidase subunit II protein	906
SM_b20258	D	SM_b20258_m1	D	-28	-11	TCTTTTGTCGACAAGAAG	15.4	2.9e-08	-17356	7538		SMc00328	SMc03015							SM_b21272	6	845977	847047	D	1237107	-	SM_b21272	NP_437316.1	356	COG1609	K	LacI family transcriptional regulator (plasmid)	5428		SM_b21650	5	1681406	1682485	D	1237901	-	SM_b21650	NP_438109.1	359	COG1609	K	LacI family transcriptional regulator (plasmid)	6217
SMc02425	R	SM_b20258_m2	R	-94	-77	AATATTGTCTACAATATG	11.5	1.1e-06	-13720	5959		SMc00333	SMc03046							SM_b21180	6	926839	927792	R	1237177	-	SM_b21180	NP_437386.1	317	COG0583	K	LysR family transcriptional regulator (plasmid)	5497		SM_b21598	5	1138924	1139973	D	1237369	-	SM_b21598	NP_437578.1	349	COG1609	K	transcriptional regulator (plasmid)	5687
SM_b20258	D	SM_b20258_m2	D	-28	-11	TCTTTTGTCGACAAGAAG	15.4	2.9e-08	-17356	7538		SMc00362	SMc03060							SM_b20441	6	452507	453247	D	1236754	-	SM_b20441	NP_436963.1	246	COG2186	K	transcriptional regulator (plasmid)	5074		SM_b21177	5	923271	924110	R	1237174	phoC	SM_b21177	NP_437383.1	279	COG3638	P	phosphate uptake ABC transporter ATP-binding protein (plasmid)	5494
SMc00638	R	SM_b20258_m3	R	-149	-124	ACCTTGAATATTAACTGTCGGCAGTA	11.3	4.0e-07	-14732	6398		SMc00363	SMc03122							SM_b20162	6	180077	180766	D	1236493	-	SM_b20162	NP_436702.1	229	COG2197	TK	transcriptional regulator (plasmid)	4812		SM_b21169	5	916402	916827	D	1237166	-	SM_b21169	NP_437375.1	141	COG0640	K	ArsR family transcriptional regulator (plasmid)	5486
SMa0955	D	SM_b20258_m3	D	-100	-75	TGCTAGTAGTCGTTGATGCGACAAAA	8.2	2.8e-06	-12786	5553		SMc00375	SMc03123							SMa2387	6	1348373	1349071	D	1236327	-	SMa2387	NP_436536.2	232	COG1309	K	TetR family transcriptional regulator (plasmid)	4645		SM_b21117	5	758135	758593	R	1237027	-	SM_b21117	NP_437236.1	152	COG1396	K	transcriptional regulator (plasmid)	5349
SM_b20258	D	SM_b20258_m3	D	-38	-13	GAGAAGTATTTCTTTTGTCGACAAGA	21.6	3.2e-11	-24165	10495		SMc00380	SMc03140							SMa1736	6	981384	982265	R	1235992	-	SMa1736	NP_436202.1	293	COG0583	K	LysR family transcriptional regulator (plasmid)	4317		SM_b20935	5	1160892	1161143	R	1237389	exsI	SM_b20935	NP_437598.1	83	COG1396	K	transcriptional regulator (plasmid)	5707
SM_b21021	D	SM_b20258_m3	D	-204	-179	ATCATATAGCTCAATTGTCGTCAATA	9.0	1.7e-06	-13285	5770		SMc00409	SMc03150							SMa0222	6	122050	122778	D	1235343	-	SMa0222	NP_435364.1	242	COG1802	K	GntR family transcriptional regulator (plasmid)	3481		SM_b20808	5	593495	594271	R	1236879	-	SM_b20808	NP_437088.1	258			hypothetical protein SM_b20808 (plasmid)	5201
SM_b20258	D	SM_b20258_m4	D	-27	-1	CTTTTGTCGACAAGAAGGAGACCGCAT	8.1	3.5e-06	-12563	5456		SMc00410	SMc03165							SMc03015	5	714089	714826	D	1232286	-	SMc03015	NP_384753.1	245	COG2197	TK	transcriptional regulator	649		SM_b20525	5	550946	551554	D	1236836	-	SM_b20525	NP_437045.1	202	COG1309	K	transcriptional regulator (plasmid)	5158
SM_b20262	D	SM_b20258_m4	D	-199	-173	GTTCTGCATACATAGAGTATACAAACC	9.1	1.9e-06	-13174	5721		SMc00414	SMc03169							SMc02976	5	3098015	3098518	R	1234545	-	SMc02976	NP_386974.1	167	COG1846	K	transcriptional regulator	2877		SM_b20523	5	549220	550428	R	1236835	-	SM_b20523	NP_437044.1	402	COG3706	TK	hypothetical protein SM_b20523 (plasmid)	5157
SM_b20263	D	SM_b20258_m4	D	-115	-89	CTGTTATATACTTTTTGTATACTAATT	14.6	4.0e-08	-17034	7398		SMc00415	SMc03170							SMc00877	5	909133	909966	D	1232470	-	SMc00877	NP_384935.1	277	COG2197	TK	transcriptional regulator	831		SM_b20457	5	468904	470052	R	1236770	-	SM_b20457	NP_436979.1	382	COG2207	K	transcriptional regulator transcription regulator protein (plasmid)	5090
SM_b20263	D	SM_b20258_m4	D	-104	-78	TTTTTGTATACTAATTGTATTTTTAAA	13.2	1.2e-07	-15936	6921		SMc00432	SMc03210							SMc00380	5	333980	334474	R	1231934	-	SMc00380	NP_384406.1	164	COG1846	K	transcriptional regulator	301		SM_b20285	5	289741	290718	R	1236606	-	SM_b20285	NP_436815.1	325	COG0583	K	transcriptional regulator (plasmid)	4926
SM_b20387	R	SM_b20258_m4	R	-62	-36	TATTAGAAGACAGCGTATATATATGTT	7.4	5.3e-06	-12148	5276		SMc00433	SMc03258							SM_b21525	5	1049322	1050797	R	1237295	-	SM_b21525	NP_437504.1	491	COG1167	KE	transcriptional regulator (plasmid)	5613		SM_b20004	5	7268	8173	R	1236420	gstR	SM_b20004	NP_436547.1	301	COG0583	K	gstR-like transcriptional regulator protein (plasmid)	4656
SM_b20387	R	SM_b20258_m4	R	-51	-25	CTTTTGTCTTCTATTAGAAGACAGCGT	11.9	3.0e-07	-15019	6523		SMc00458	SMc03816							SM_b21270	5	844532	844996	D	1237105	-	SM_b21270	NP_437314.1	154	COG0664	T	transcriptional regulator (plasmid)	5426		SMa2287	5	1271938	1272870	R	1236268	-	SMa2287	NP_436477.2	310	COG0583	K	LysR family transcriptional regulator (plasmid)	4584
SM_b21079	D	SM_b20258_m4	D	-153	-127	ATTGCATAGACGATAAGTCTACAACTA	7.2	6.3e-06	-11975	5201		SMc00475	SMc03820							SM_b21169	5	916402	916827	D	1237166	-	SM_b21169	NP_437375.1	141	COG0640	K	ArsR family transcriptional regulator (plasmid)	5486		SMa2015	5	1141886	1142407	R	1236140	-	SMa2015	NP_436350.1	173	COG0583	K	transcriptional regulator (plasmid)	4462
SM_b20258	D	SM_b20258_m5	D	-33	-17	GTATTTCTTTTGTCGAC	16.9	1.2e-10	-22844	9921		SMc00479	SMc03843							SM_b21102	5	744023	744805	R	1237012	-	SM_b21102	NP_437221.1	260	COG1414	K	transcriptional regulator (plasmid)	5334		SMa1979	5	1124993	1125865	D	1236123	-	SMa1979	NP_436333.1	290	COG0583	K	LysR family transcriptional regulator (plasmid)	4446
SM_b20901	R	SM_b20258_m5	R	-283	-267	ACATTTATTTTCTCGAC	11.3	1.7e-06	-13285	5770		SMc00485	SMc03873							SM_b20667	5	1467800	1468804	R	1237706	-	SM_b20667	NP_437914.1	334	COG1609	K	LacI family transcriptional regulator (plasmid)	6023		SMa1749	5	991460	992359	R	1236000	-	SMa1749	NP_436210.1	299	COG2207	K	transcriptional regulator (plasmid)	4325
SM_b20276	D	SM_b20276_m1	D	-51	-28	ACACTGAAACATTCGTTGCAATGG	22.1	1.1e-11	-25233	10959		SMc00488	SMc03890							SM_b20525	5	550946	551554	D	1236836	-	SM_b20525	NP_437045.1	202	COG1309	K	transcriptional regulator (plasmid)	5158		SMa1726	5	973914	974525	R	1235985	-	SMa1726	NP_436195.2	203	COG1309	K	TetR family transcriptional regulator (plasmid)	4310
SMc00820	R	SM_b20276_m2	R	-60	-37	CATTAAAAACATTCGTTGGACTGA	4.4	9.7e-06	-11543	5013		SMc00489	SMc03998							SM_b20516	5	541280	541606	D	1236828	-	SM_b20516	NP_437037.1	108			response regulator protein (plasmid)	5150		SMa1698	5	957928	958383	R	1235969	syrB1	SMa1698	NP_436179.1	151			syrB1 regulator (plasmid)	4297
SMc00821	D	SM_b20276_m2	D	-178	-155	CATTAAAAACATTCGTTGGACTGA	4.4	9.7e-06	-11543	5013		SMc00490	SMc04011							SM_b20337	5	342776	343387	R	1236654	-	SM_b20337	NP_436863.1	203	COG1309	K	transcriptional regulator (plasmid)	4974		SMa1299	5	709054	709665	D	1235743	-	SMa1299	NP_435953.1	203	COG1309	K	TetR family transcriptional regulator (plasmid)	4068
SM_b20072	R	SM_b20276_m2	R	-95	-72	AGAATGAAATGTACATTTCATTCG	4.5	9.7e-06	-11543	5013		SMc00492	SMc04032							SMa2004	5	1136007	1137080	D	1236134	-	SMa2004	NP_436344.1	357	COG1846	K	ROK family transcriptional regulator (plasmid)	4456		SMa0748	5	402138	402587	D	1235218	-	SMa0748	NP_435644.2	149	COG4957	K	MucR family transcriptional regulator (plasmid)	3757
SM_b20276	D	SM_b20276_m2	D	-51	-28	ACACTGAAACATTCGTTGCAATGG	22.7	7.2e-12	-25657	11143		SMc00493	SMc04055							SMa1726	5	973914	974525	R	1235985	-	SMa1726	NP_436195.2	203	COG1309	K	TetR family transcriptional regulator (plasmid)	4310		SMc04410	4	3617313	3618347	D	1235010	asd	SMc04410	NP_387422.1	344	COG0136	E	aspartate-semialdehyde dehydrogenase	3334
SMc00794	R	SM_b20276_m3	R	-127	-108	AGAAACAGTCGCGGCAAATG	8.1	7.0e-06	-11870	5155		SMc00494	SMc04109							SMa1442	5	795334	796098	R	1235824	-	SMa1442	NP_436034.1	254	COG2186	K	GntR family transcriptional regulator (plasmid)	4151		SMc04296	4	2214116	2215156	R	1233717	ftsZ2	SMc04296	NP_386157.1	346	COG0206	D	cell division protein FtsZ	2059
SMc00820	R	SM_b20276_m3	R	-60	-41	AAAAACATTCGTTGGACTGA	9.4	3.0e-06	-12717	5523		SMc00505	SMc04134							SMa0307	5	172016	173002	R	1235391	-	SMa0307	NP_435412.1	328	COG0583	K	LysR family transcriptional regulator (plasmid)	3528		SMc04220	4	2047050	2047367	R	1233555	-	SMc04220	NP_385996.1	105	COG0640	K	transcriptional regulator	1896
SMc00821	D	SM_b20276_m3	D	-174	-155	AAAAACATTCGTTGGACTGA	9.4	3.0e-06	-12717	5523		SMc00508	SMc04143							SMa0078	5	40959	41981	D	1235263	-	SMa0078	NP_435284.1	340	COG1609	K	LacI family transcriptional regulator (plasmid)	3399		SMc04162	4	2151826	2152155	R	1233656	-	SMc04162	NP_386097.1	109	COG0640	K	transcriptional regulator	1999
SM_b20276	D	SM_b20276_m3	D	-47	-28	TGAAACATTCGTTGCAATGG	21.1	9.1e-12	-25423	11041		SMc00528	SMc04162							SMc03169	4	3130227	3130937	D	1234577	-	SMc03169	NP_387006.1	236	COG1309	K	transcriptional regulator	2909		SMc04055	4	3057996	3058952	R	1234515	-	SMc04055	NP_386944.1	318	COG0583	K	transcriptional regulator	2847
SMc00820	R	SM_b20276_m4	R	-60	-37	CATTAAAAACATTCGTTGGACTGA	4.8	8.4e-06	-11687	5076		SMc00548	SMc04163							SMc02429	4	2801505	2802413	R	1234272	-	SMc02429	NP_386710.2	302	COG0583	K	transcriptional regulator	2614		SMc04032	4	3035290	3036072	R	1234491	-	SMc04032	NP_386921.1	260	COG2197	TK	transcriptional regulator	2824
SMc00821	D	SM_b20276_m4	D	-178	-155	CATTAAAAACATTCGTTGGACTGA	4.8	8.4e-06	-11687	5076		SMc00551	SMc04169							SM_b20494	4	511441	512337	D	1236807	-	SM_b20494	NP_437016.1	298	COG0583	K	transcriptional regulator (plasmid)	5128		SMc03967	4	2960780	2961292	R	1234427	ruvC	SMc03967	NP_386857.1	170	COG0817	L	Holliday junction resolvase	2760
SM_b20072	R	SM_b20276_m4	R	-95	-72	AGAATGAAATGTACATTTCATTCG	4.5	9.7e-06	-11543	5013		SMc00554	SMc04203							SMa5007	4	550344	550724	R	6435273	-	SMa5007	YP_002000351.1	126	COG5499	V	transcriptional regulator (plasmid)	3899		SMc03816	4	3483136	3484338	D	1234893	-	SMc03816	NP_387305.1	400	COG1846	K	transcriptional regulator	3216
SM_b20276	D	SM_b20276_m4	D	-51	-28	ACACTGAAACATTCGTTGCAATGG	23.4	2.5e-12	-26715	11602		SMc00555	SMc04220							SMa1067	4	583446	584192	D	1235614	-	SMa1067	NP_435824.1	248	COG0664	T	transcriptional regulator (plasmid)	3941		SMc03258	4	3373376	3374068	R	1234797	-	SMc03258	NP_387217.1	230	COG1802	K	transcriptional regulator	3122
SMc04230	R	SM_b20276_m5	R	-91	-81	CAGTGCAACGA	10.1	6.0e-06	-12024	5222		SMc00558	SMc04260							SMa0815	4	445895	447520	R	1235479	nifA	SMa0815	NP_435689.2	541	COG3604	KT	Fis family transcriptional regulator (plasmid)	3803		SMc03171	4	3132063	3132815	D	1234579	-	SMc03171	NP_387008.1	250	COG0861	P	hypothetical protein SMc03171	2911
SM_b20337	R	SM_b20276_m5	R	-43	-33	GTATGCAACTA	10.3	4.3e-06	-12357	5367		SMc00570	SMc04264							SMa0402	4	217871	218602	D	1235439	-	SMa0402	NP_435460.1	243	COG2188	K	GntR family transcriptional regulator (plasmid)	3577		SMc03039	4	734262	735467	D	1232310	flaD	SMc03039	NP_384777.1	401	COG1344	N	flagellin D protein	673
SMc04134	D	SM_b20285_m1	D	-62	-50	ATTATGACAAAGT	12.6	1.8e-07	-15530	6745		SMc00571	SMc04315							SMc03170	3	3131057	3131896	D	1234578	-	SMc03170	NP_387007.1	279	COG2207	K	transcriptional regulator	2910		SMc02976	4	3098015	3098518	R	1234545	-	SMc02976	NP_386974.1	167	COG1846	K	transcriptional regulator	2877
SMc01885	D	SM_b20285_m1	D	-207	-195	TGTATGACAAATG	10.2	6.6e-06	-11928	5180		SMc00572	SMc04348							SMc02340	3	2761391	2762125	D	1234236	-	SMc02340	NP_386674.1	244	COG2188	K	transcriptional regulator	2578		SMc02942	4	2946821	2947351	R	1234414	pal	SMc02942	NP_386844.1	176	COG2885	M	peptidoglycan-associated lipoprotein	2747
SMc03890	R	SM_b20285_m1	R	-223	-211	TTTATGCGAAATT	11.8	9.3e-07	-13888	6032		SMc00573	SMc04882							SMa0355	1	191922	192416	D	1235416	-	SMa0355	NP_435437.2	164	COG0583	K	LysR family transcriptional regulator (plasmid)	3554		SMc02896	4	253002	254099	R	1231853	ilvE1	SMc02896	NP_384327.1	365	COG0115	EH	branched-chain amino acid aminotransferase	222
SMc03891	D	SM_b20285_m1	D	-64	-52	TTTATGCGAAATT	11.8	9.3e-07	-13888	6032		SMc00575																							SMc02893	4	250422	251348	D	1231850	-	SMc02893	NP_384324.1	308	COG0583	K	transcriptional regulator	219
SM_b20285	R	SM_b20285_m1	R	-190	-178	CATATGAGAAAGG	10.3	6.1e-06	-12007	5215		SMc00576																							SMc02844	4	193777	194370	R	1231800	-	SMc02844	NP_384275.1	197	COG1309	K	transcriptional regulator	169
SMc03874	R	SM_b20285_m2	R	-257	-240	GATCAGTGTATGAAAACT	9.1	7.8e-06	-11761	5108		SMc00581															SMc03873	NP_387362.2	288	COG0568	K	RNA polymerase factor sigma-32			SMc02484	4	3310806	3311450	R	1234735	-	SMc02484	NP_387157.1	214	COG1280	E	amino acid efflux transmembrane protein	3061
SM_b20285	R	SM_b20285_m2	R	-22	-5	GCCCAGTGCATTATAGCT	18.6	3.2e-11	-24165	10495		SMc00590															SMc00646	NP_386832.1	301	COG0568	K	RNA polymerase factor sigma-32			SMc02479	4	3318498	3319460	R	1234740	mdh	SMc02479	NP_387162.1	320	COG0039	C	malate dehydrogenase	3066
SMc02543	D	SM_b20285_m3	D	-82	-73	CTATAATGCA	11.6	2.3e-06	-12983	5638		SMc00593															SM_b21484	NP_437851.1	173	COG1595	K	RNA polymerase sigma-E factor (sigma-24) protein (plasmid)			SMc02447	4	2829473	2829793	R	1234296	-	SMc02447	NP_386728.1	106			hypothetical protein SMc02447	2632
SMc01876	R	SM_b20285_m4	R	-104	-79	AACGTCATGATCGGCAATTCATGCAA	8.1	7.3e-06	-11828	5137		SMc00594															SMc04203	NP_386137.1	159	COG1595	K	RNA polymerase sigma factor FECI protein			SMc02307	4	679893	681197	D	1232249	hisD	SMc02307	NP_384717.1	434	COG0141	E	histidinol dehydrogenase	613
SM_b20285	R	SM_b20285_m4	R	-36	-11	TGCATTATAGCTGCCTCATACTGCAT	19.6	8.6e-11	-23177	10066		SMc00604															SMc04011	NP_386901.1	513	COG2204	T	sigma-54-dependent transcription regulator protein			SMc02274	4	648454	649677	D	1232215	rkpU	SMc02274	NP_384684.2	407	COG1596	M	capsule polysaccharide exporter protein	579
SM_b21533	D	SM_b20285_m4	D	-110	-85	AACATCACAAATCGCAAATTATGCAC	9.0	4.2e-06	-12380	5377		SMc00608															SM_b20531	NP_437050.1	178	COG1595	K	RNA polymerase sigma factor (plasmid)			SMc02147	4	565258	566520	D	1232144	phoR	SMc02147	NP_384614.1	420	COG5002	T	phosphate regulon sensor histidine kinase transmembrane protein	509
SM_b20285	R	SM_b20285_m5	R	-22	-5	GCCCAGTGCATTATAGCT	22.3	4.1e-12	-26220	11387		SMc00609															SMc01563	NP_386420.1	684	COG0568	K	RNA polymerase sigma factor RpoD			SMc02118	4	1592083	1593108	R	1233131	aapJ	SMc02118	NP_385584.1	341	COG0834	ET	general L-amino acid-binding periplasmic ABC transporter protein	1483
SMa0089	D	SM_b20337_m1	D	-127	-113	GTTTCACATACGTAG	11.7	1.4e-06	-13479	5854		SMc00610															SMc01139	NP_384487.1	514	COG1508	K	RNA polymerase factor sigma-54			SMc02117	4	1593446	1594633	D	1233132	metC	SMc02117	NP_385585.1	395	COG0626	E	cystathionine beta-lyase	1484
SMa0089	D	SM_b20337_m1	D	-79	-65	GGTTCACATACGCTG	11.2	2.2e-06	-13027	5658		SMc00618																							SMc02083	4	1628736	1629395	D	1233166	-	SMc02083	NP_385619.1	219	COG2518	O	methyltransferase (PCM-like) transmembrane protein	1518
SM_b20337	R	SM_b20337_m1	R	-31	-17	ATTTGACATACGCGG	15.0	1.5e-08	-18015	7824		SMc00620																							SMc02059	4	1658653	1659528	R	1233190	-	SMc02059	NP_385643.1	291	COG2607	R	hypothetical protein SMc02059	1542
SMc02844	R	SM_b20337_m2	R	-52	-26	AGGATACATGCAGATTGTATGTGATCG	3.9	4.2e-06	-12380	5377		SMc00638																							SMc02058	4	1659867	1660199	D	1233191	-	SMc02058	NP_385644.1	110	COG1862	U	YAJC protein	1543
SMa0089	D	SM_b20337_m2	D	-127	-101	GTTTCACATACGTAGCGTATATGTGAG	18.7	8.6e-10	-20874	9066		SMc00641																							SMc01787	4	1331907	1332437	D	1232869	-	SMc01787	NP_385331.1	176	COG0789	K	transcriptional regulator	1230
SMa0089	D	SM_b20337_m2	D	-79	-53	GGTTCACATACGCTGCGTATGTAGAGC	16.6	4.0e-09	-19337	8398		SMc00643																							SMc01651	4	2448176	2449084	D	1233929	-	SMc01651	NP_386369.1	302	COG0583	K	transcriptional regulator	2272
SM_b20262	D	SM_b20337_m2	D	-199	-173	GTTCTGCATACATAGAGTATACAAACC	3.3	5.5e-06	-12111	5260		SMc00646																							SMc01579	4	2385374	2386090	R	1233876	-	SMc01579	NP_386316.1	238	COG1192	N	hypothetical protein SMc01579	2219
SM_b20263	D	SM_b20337_m2	D	-115	-89	CTGTTATATACTTTTTGTATACTAATT	7.9	6.6e-07	-14231	6180		SMc00651																							SMc01406	4	2248249	2249667	R	1233751	-	SMc01406	NP_386191.1	472	COG1167	KE	transcriptional regulator	2093
SM_b20263	D	SM_b20337_m2	D	-104	-78	TTTTTGTATACTAATTGTATTTTTAAA	3.3	5.5e-06	-12111	5260		SMc00652																							SMc01260	4	1515627	1516013	D	1233057	-	SMc01260	NP_385510.1	128	COG0789	K	transcriptional regulator	1409
SM_b20337	R	SM_b20337_m2	R	-73	-47	AGATTCCATACGCCGCGTATGTCATTC	18.2	1.2e-09	-20541	8921		SMc00654																							SMc01215	4	1708859	1712350	R	1233230	carB	SMc01215	NP_385682.1	1163	COG0458	EF	carbamoyl phosphate synthase large subunit	1581
SM_b20337	R	SM_b20337_m2	R	-43	-17	ATTTGACATACGCGGCGTATGCAACTA	23.5	5.3e-12	-25963	11276		SMc00655																							SMc01202	4	1727335	1727919	R	1233244	-	SMc01202	NP_385696.1	194			lipoprotein	1595
SMc02844	R	SM_b20337_m3	R	-52	-26	AGGATACATGCAGATTGTATGTGATCG	3.7	4.7e-06	-12268	5328		SMc00679																							SMc01187	4	1742755	1743795	R	1233260	rlpA	SMc01187	NP_385712.1	346	COG0797	M	rare lipoprotein A	1611
SMa0089	D	SM_b20337_m3	D	-127	-101	GTTTCACATACGTAGCGTATATGTGAG	18.6	8.5e-10	-20886	9071		SMc00683																							SMc01104	4	450468	452834	R	1232050	mcpX	SMc01104	NP_384522.1	788	COG0840	NT	chemoreceptor methyl-accepting chemotaxis transmembrane protein	417
SMa0089	D	SM_b20337_m3	D	-79	-53	GGTTCACATACGCTGCGTATGTAGAGC	16.7	3.7e-09	-19415	8432		SMc00690																							SMc01052	4	1582449	1583036	R	1233121	-	SMc01052	NP_385574.1	195	COG0590	J	hypothetical protein SMc01052	1473
SM_b20262	D	SM_b20337_m3	D	-199	-173	GTTCTGCATACATAGAGTATACAAACC	3.2	5.6e-06	-12093	5252		SMc00698																							SMc00978	4	959627	960616	R	1232515	-	SMc00978	NP_384980.1	329	COG0598	P	hypothetical protein SMc00978	876
SM_b20263	D	SM_b20337_m3	D	-115	-89	CTGTTATATACTTTTTGTATACTAATT	7.8	7.2e-07	-14144	6143		SMc00703																							SMc00944	4	1770999	1771760	D	1233295	-	SMc00944	NP_385742.1	253	COG1058	R	hypothetical protein SMc00944	1641
SM_b20263	D	SM_b20337_m3	D	-104	-78	TTTTTGTATACTAATTGTATTTTTAAA	3.1	5.9e-06	-12041	5229		SMc00704																							SMc00943	4	1770238	1770837	R	1233294	wrbA1	SMc00943	NP_385741.1	199	COG0655	C	TrpR binding protein WrbA	1640
SM_b20337	R	SM_b20337_m3	R	-73	-47	AGATTCCATACGCCGCGTATGTCATTC	18.3	1.1e-09	-20628	8959		SMc00720																							SMc00896	4	887162	887980	D	1232449	-	SMc00896	NP_384914.1	272	COG0483	G	sulfite biosynthesis protein	810
SM_b20337	R	SM_b20337_m3	R	-43	-17	ATTTGACATACGCGGCGTATGCAACTA	23.6	5.5e-12	-25926	11260		SMc00737																							SMc00781	4	801316	802812	D	1232366	iolA	SMc00781	NP_384832.1	498	COG1012	C	malonic semialdehyde oxidative decarboxylase	728
SMc02844	R	SM_b20337_m4	R	-52	-26	AGGATACATGCAGATTGTATGTGATCG	3.7	4.8e-06	-12247	5319		SMc00762																							SMc00780	4	800319	801200	R	1232365	-	SMc00780	NP_384831.1	293	COG0583	K	transcriptional regulator	727
SMa0089	D	SM_b20337_m4	D	-127	-101	GTTTCACATACGTAGCGTATATGTGAG	18.6	8.4e-10	-20898	9076		SMc00766																							SMc00766	4	778588	779463	D	1232349	-	SMc00766	NP_384816.1	291	COG0583	K	transcriptional regulator	712
SMa0089	D	SM_b20337_m4	D	-79	-53	GGTTCACATACGCTGCGTATGTAGAGC	16.7	3.9e-09	-19362	8409		SMc00780																							SMc00690	4	2887348	2888301	D	1234357	accA	SMc00690	NP_386788.1	317	COG0825	I	acetyl-CoA carboxylase carboxyltransferase subunit alpha	2692
SM_b20262	D	SM_b20337_m4	D	-199	-173	GTTCTGCATACATAGAGTATACAAACC	3.4	5.7e-06	-12075	5244		SMc00781																							SMc00652	4	2923767	2924432	R	1234396	-	SMc00652	NP_386826.1	221	COG5385	S	hypothetical protein SMc00652	2729
SM_b20263	D	SM_b20337_m4	D	-115	-89	CTGTTATATACTTTTTGTATACTAATT	9.6	3.0e-07	-15019	6523		SMc00785																							SMc00651	4	2924797	2925399	D	1234397	-	SMc00651	NP_386827.1	200	COG5400	S	hypothetical protein SMc00651	2730
SM_b20263	D	SM_b20337_m4	D	-104	-78	TTTTTGTATACTAATTGTATTTTTAAA	4.9	2.8e-06	-12786	5553		SMc00786																							SMc00646	4	2929335	2930240	D	1234402	rpoH1	SMc00646	NP_386832.1	301	COG0568	K	RNA polymerase factor sigma-32	2735
SM_b20337	R	SM_b20337_m4	R	-73	-47	AGATTCCATACGCCGCGTATGTCATTC	18.4	9.8e-10	-20743	9009		SMc00791																							SMc00610	4	1281531	1282127	D	1232823	-	SMc00610	NP_385285.1	198	COG0494	V	hypothetical protein SMc00610	1184
SM_b20337	R	SM_b20337_m4	R	-43	-17	ATTTGACATACGCGGCGTATGCAACTA	23.6	4.9e-12	-26042	11310		SMc00794																							SMc00594	4	1267334	1268023	D	1232807	ligE	SMc00594	NP_385269.1	229	COG0625	O	beta-etherase (BETA-aryl ether cleaving enzyme) protein	1168
SMa0089	D	SM_b20337_m5	D	-124	-113	TCACATACGTAG	12.3	6.3e-07	-14278	6201		SMc00813																							SMc00571	4	1240670	1241614	D	1232785	fabD	SMc00571	NP_385247.1	314	COG0331	I	ACP S-malonyltransferase	1145
SMa0089	D	SM_b20337_m5	D	-76	-65	TCACATACGCTG	12.3	6.3e-07	-14278	6201		SMc00820																							SMc00570	4	1239292	1240335	R	1232784	-	SMc00570	NP_385246.1	347	COG0667	R	oxidoreductase	1144
SM_b20337	R	SM_b20337_m5	R	-31	-20	TGACATACGCGG	12.8	1.7e-07	-15587	6770		SMc00821																							SMc00551	4	1220729	1221427	D	1232765	-	SMc00551	NP_385227.1	232	COG0688	I	phosphatidylserine decarboxylase	1125
SMc03124	R	SM_b20347_m1	R	-267	-255	ATGTCGTCAGACG	9.1	8.8e-06	-11641	5056		SMc00825																							SMc00490	4	1918527	1919945	D	1233442	-	SMc00490	NP_385883.1	472	COG1167	KE	transcriptional regulator	1783
SMc03123	D	SM_b20347_m1	D	-131	-119	ATGTCGTCAGACG	9.1	8.8e-06	-11641	5056		SMc00829																							SMc00485	4	1930545	1931162	R	1233452	rpsD	SMc00485	NP_385893.1	205	COG0522	J	30S ribosomal protein S4	1793
SM_b20347	R	SM_b20347_m1	R	-47	-35	ATTTCGTCAGTCG	15.3	3.6e-08	-17140	7444		SMc00830																							SMc00300	4	1872516	1873919	D	1233394	-	SMc00300	NP_385835.1	467	COG1249	C	soluble pyridine nucleotide transhydrogenase	1734
SMc00785	D	SM_b20347_m2	D	-40	-23	TATGATGAGGCACGAATT	5.2	9.7e-06	-11543	5013		SMc00831																							SMc00163	4	2002291	2003313	D	1233509	-	SMc00163	NP_385950.1	340	COG1879	G	transcriptional regulator	1850
SMc01025	D	SM_b20347_m2	D	-64	-47	AATTCTGAAAGACGAATT	5.3	9.7e-06	-11543	5013		SMc00860																							SM_b21493	4	1414906	1415367	R	1237654	-	SM_b21493	NP_437862.1	153	COG1522	K	AsnC family transcriptional regulator (plasmid)	5971
SM_b20347	R	SM_b20347_m2	R	-30	-13	GATGATGAGTGACGAATT	16.7	6.8e-09	-18806	8167		SMc00872																							SM_b21479	4	1403027	1403329	D	1237637	-	SM_b21479	NP_437845.1	100			hypothetical protein SM_b21479 (plasmid)	5954
SMc02340	D	SM_b20347_m3	D	-151	-126	TGTAACGTTGTACGTACATCGTAATC	0.7	8.5e-06	-11675	5071		SMc00877																							SM_b21187	4	936834	937664	D	1237184	-	SM_b21187	NP_437393.1	276	COG0789	K	LacI family transcriptional regulator (plasmid)	5504
SM_b20129	D	SM_b20347_m3	D	-291	-266	GATATAGTATATTATCACGCGTCAGT	0.8	8.2e-06	-11711	5086		SMc00878																							SM_b21186	4	935353	936621	R	1237183	gabT	SM_b21186	NP_437392.1	422	COG0160	E	4-aminobutyrate aminotransferase (plasmid)	5503
SM_b20347	R	SM_b20347_m3	R	-66	-41	TCAGTCGTAATCCGATAATCGTGACT	8.6	2.0e-07	-15425	6699		SMc00879																							SM_b21181	4	927980	929167	D	1237178	-	SM_b21181	NP_437387.1	395	COG1960	I	glutaryl-CoA dehydrogenase (plasmid)	5498
SM_b20347	R	SM_b20347_m3	R	-52	-27	AATTTTGAATTTCGTCAGTCGTAATC	3.1	3.0e-06	-12717	5523		SMc00888																							SM_b21180	4	926839	927792	R	1237177	-	SM_b21180	NP_437386.1	317	COG0583	K	LysR family transcriptional regulator (plasmid)	5497
SM_b20347	R	SM_b20347_m3	R	-45	-20	AGTGACGAATTTTGAATTTCGTCAGT	28.7	1.5e-14	-31831	13824		SMc00896																							SM_b20942	4	1168150	1169136	D	1237396	exoB	SM_b20942	NP_437605.1	328	COG1087	M	UDP glucose 4-epimerase (plasmid)	5714
SMc03140	R	SM_b20347_m4	R	-169	-152	ATGTTGTCAGTTGTCTTA	8.2	8.0e-06	-11736	5097		SMc00916																							SM_b20759	4	1551986	1552456	D	1237783	phnG	SM_b20759	NP_437991.1	156	COG3624	P	carbon-phosphorus lyase (plasmid)	6099
SM_b20347	R	SM_b20347_m4	R	-73	-56	TAATCGTGACTTGTCAAC	13.1	2.2e-07	-15330	6658		SMc00929																							SM_b20758	4	1551129	1551863	R	1237782	-	SM_b20758	NP_437990.2	244	COG2188	K	ArsR family transcriptional regulator (plasmid)	6098
SM_b20347	R	SM_b20347_m4	R	-52	-35	ATTTCGTCAGTCGTAATC	19.1	1.8e-10	-22438	9745		SMc00943																							SM_b20531	4	554980	555516	D	1236841	-	SM_b20531	NP_437050.1	178	COG1595	K	RNA polymerase sigma factor (plasmid)	5163
SMc01651	D	SM_b20347_m5	D	-74	-60	ACGAAATGCGTCAGC	8.1	8.7e-06	-11652	5060		SMc00944																							SM_b20448	4	460635	461153	D	1236761	-	SM_b20448	NP_436970.1	172			hypothetical protein SM_b20448 (plasmid)	5081
SMc02942	R	SM_b20347_m5	R	-239	-225	TTGAATCTCATCATT	9.7	3.4e-06	-12592	5469		SMc00947																							SM_b20441	4	452507	453247	D	1236754	-	SM_b20441	NP_436963.1	246	COG2186	K	transcriptional regulator (plasmid)	5074
SMc03124	R	SM_b20347_m5	R	-265	-251	CCGAATGTCGTCAGA	9.0	5.4e-06	-12129	5268		SMc00948																							SM_b20347	4	354773	355381	R	1236664	-	SM_b20347	NP_436873.1	202	COG1309	K	transcriptional regulator (plasmid)	4984
SMc03123	D	SM_b20347_m5	D	-135	-121	CCGAATGTCGTCAGA	9.0	5.4e-06	-12129	5268		SMc00953																							SM_b20262	4	266814	268331	D	1236583	-	SM_b20262	NP_436792.1	505	COG1012	C	semialdehyde dehydrogenase (plasmid)	4903
SM_b20347	R	SM_b20347_m5	R	-45	-31	TTGAATTTCGTCAGT	18.0	9.6e-10	-20764	9018		SMc00964																							SM_b20258	4	263237	263947	D	1236579	-	SM_b20258	NP_436788.1	236	COG1802	K	transcriptional regulator (plasmid)	4899
SM_b20366	D	SM_b20366_m1	D	-130	-118	GCGCGTGCAAATG	11.0	1.8e-06	-13228	5745		SMc00975																							SM_b20162	4	180077	180766	D	1236493	-	SM_b20162	NP_436702.1	229	COG2197	TK	transcriptional regulator (plasmid)	4812
SM_b20366	D	SM_b20366_m1	D	-30	-18	CTGCGTGCAAGGT	10.3	5.8e-06	-12058	5237		SMc00978																							SMa2049	4	1158529	1159611	D	1236156	-	SMa2049	NP_436366.1	360	COG1879	G	LacI family transcriptional regulator (plasmid)	4479
SMc01169	R	SM_b20366_m2	R	-142	-121	TTATTGCACAAAATTGCGACTA	9.3	5.0e-06	-12206	5301		SMc00983																							SMa1736	4	981384	982265	R	1235992	-	SMa1736	NP_436202.1	293	COG0583	K	LysR family transcriptional regulator (plasmid)	4317
SMc01168	D	SM_b20366_m2	D	-41	-20	TTATTGCACAAAATTGCGACTA	9.3	5.0e-06	-12206	5301		SMc00987																							SMa1387	4	764198	765112	D	1235796	-	SMa1387	NP_436006.1	304	COG0583	K	LysR family transcriptional regulator (plasmid)	4123
SM_b20154	R	SM_b20366_m2	R	-235	-214	TGATTGCTCACGTGTGCATTTT	8.4	9.5e-06	-11564	5022		SMc00990																							SMa0557	4	295587	296474	R	1235110	-	SMa0557	NP_435536.1	295	COG0583	K	LysR family transcriptional regulator (plasmid)	3652
SM_b20366	D	SM_b20366_m2	D	-139	-118	TTTTTGCAAGCGCGTGCAAATG	18.3	1.8e-10	-22438	9745		SMc01010																							SMa0520	4	280693	281535	D	1235094	-	SMa0520	NP_435520.1	280	COG1737	K	RpiR family transcriptional regulator (plasmid)	3635
SM_b20366	D	SM_b20366_m2	D	-61	-40	GCGTTGCACGCATTTGCAAAAT	14.5	7.3e-08	-16433	7137		SMc01018																							SMa0355	4	191922	192416	D	1235416	-	SMa0355	NP_435437.2	164	COG0583	K	LysR family transcriptional regulator (plasmid)	3554
SM_b20366	D	SM_b20366_m2	D	-51	-30	CATTTGCAAAATAGTGCAATTC	15.5	2.7e-08	-17427	7569		SMc01025																							SMa0307	4	172016	173002	R	1235391	-	SMa0307	NP_435412.1	328	COG0583	K	LysR family transcriptional regulator (plasmid)	3528
SMc01169	R	SM_b20366_m3	R	-142	-121	TTATTGCACAAAATTGCGACTA	9.4	3.3e-06	-12622	5481		SMc01052																							SMa0222	4	122050	122778	D	1235343	-	SMa0222	NP_435364.1	242	COG1802	K	GntR family transcriptional regulator (plasmid)	3481
SMc01168	D	SM_b20366_m3	D	-41	-20	TTATTGCACAAAATTGCGACTA	9.4	3.3e-06	-12622	5481		SMc01092																							SMc04882	3	3582240	3583133	R	1234981	-	SMc04882	NP_387393.1	297	COG0583	K	transcriptional regulator	3305
SM_b20154	R	SM_b20366_m3	R	-235	-214	TGATTGCTCACGTGTGCATTTT	8.3	6.2e-06	-11991	5208		SMc01104																							SMc04449	3	1761609	1763582	D	1233284	cpdB	SMc04449	NP_385732.1	657	COG0737	FV	bifunctional 2\',3\'-cyclic nucleotide 2\'-phosphodiesterase/3\'-nucleotidase periplasmic protein	1631
SM_b20366	D	SM_b20366_m3	D	-139	-118	TTTTTGCAAGCGCGTGCAAATG	18.6	1.8e-10	-22438	9745		SMc01108																							SMc04411	3	3618520	3619341	D	1235011	-	SMc04411	NP_387423.1	273	COG2951	M	membrane-bound lytic murein transglycosylase signal peptide protein	3335
SM_b20366	D	SM_b20366_m3	D	-61	-40	GCGTTGCACGCATTTGCAAAAT	14.8	6.2e-08	-16596	7208		SMc01120																							SMc04383	3	3583247	3584647	D	1234982	-	SMc04383	NP_387394.1	466	COG5383	R	hypothetical protein SMc04383	3306
SM_b20366	D	SM_b20366_m3	D	-51	-30	CATTTGCAAAATAGTGCAATTC	15.8	2.5e-08	-17504	7602		SMc01121																							SMc04331	3	2141116	2141814	D	1233642	mtbC	SMc04331	NP_386083.1	232	COG5012	C	dimethylamine corrinoid protein	1984
SMc00704	D	SM_b20366_m4	D	-187	-167	CCGTGCTAATGAGTGCAGAAC	8.4	8.9e-06	-11629	5051		SMc01127																							SMc04198	3	2184881	2185570	D	1233691	-	SMc04198	NP_386132.2	229	COG2932	X	phage repressor protein	2034
SMa0303	D	SM_b20366_m4	D	-60	-40	CCTTGCAAACGATTAGAAATA	11.4	1.2e-06	-13633	5921		SMc01136																							SMc04115	3	160043	160459	R	1231768	-	SMc04115	NP_384243.1	138	COG4964	UW	hypothetical protein SMc04115	137
SM_b20366	D	SM_b20366_m4	D	-138	-118	TTTTGCAAGCGCGTGCAAATG	18.6	5.0e-11	-23719	10301		SMc01139																							SMc04018	3	3014867	3016753	D	1234478	-	SMc04018	NP_386908.1	628	COG0737	FV	5\'-nucleotidase	2811
SM_b20366	D	SM_b20366_m4	D	-60	-40	CGTTGCACGCATTTGCAAAAT	12.9	3.9e-07	-14757	6409		SMc01152																							SMc03961	3	2954817	2956037	D	1234421	sqdB	SMc03961	NP_386851.1	406	COG0451	M	sulfolipid (UDP-sulfoquinovose) biosynthesis protein	2754
SM_b20366	D	SM_b20366_m4	D	-50	-30	ATTTGCAAAATAGTGCAATTC	15.1	3.9e-08	-17060	7409		SMc01163																							SMc03927	3	3076748	3077236	D	1234526	nodN2	SMc03927	NP_386955.1	162	COG2030	I	nodulation protein	2858
SM_b20366	D	SM_b20366_m4	D	-28	-8	GCGTGCAAGGTCGAGGAGAGA	8.9	6.5e-06	-11944	5187		SMc01164																							SMc03893	3	3561068	3561748	D	1234970	-	SMc03893	NP_387382.1	226	COG0765	E	amino-acid transport system permease ABC transporter protein	3294
SMc04134	D	SM_b20366_m5	D	-51	-23	GTTGCACCCGAATGCCGCTAAAGGCAAGA	10.0	2.0e-06	-13122	5699		SMc01165																							SMc03830	3	3496500	3497453	R	1234907	-	SMc03830	NP_387319.1	317	COG2984	R	hypothetical protein SMc03830	3231
SM_b20366	D	SM_b20366_m5	D	-118	-90	GCTGCACGAGGATACGGGGAGTGTCAATA	17.9	1.8e-09	-20135	8745		SMc01167																							SMc03210	3	3174933	3175412	R	1234618	-	SMc03210	NP_387047.1	159	COG1522	K	transcriptional regulator	2950
SM_b20366	D	SM_b20366_m5	D	-59	-31	GTTGCACGCATTTGCAAAATAGTGCAATT	24.0	5.0e-14	-30627	13301		SMc01168																							SMc03172	3	3133083	3134540	D	1234580	gltX	SMc03172	NP_387009.1	485	COG0008	J	glutamyl-tRNA synthetase	2912
SMc02504	R	SM_b20367_m1	R	-31	-11	ATATAGACCGACGATTTATCC	6.2	5.0e-06	-12206	5301		SMc01169																							SMc02897	3	254271	255050	R	1231854	-	SMc02897	NP_384328.1	259			cytochrome C transmembrane protein	223
SMc02503	D	SM_b20367_m1	D	-97	-77	ATATAGACCGACGATTTATCC	6.2	5.0e-06	-12206	5301		SMc01187																							SMc02888	3	243152	244174	R	1231845	-	SMc02888	NP_384319.1	340	COG2207	K	transcriptional regulator	214
SM_b20154	R	SM_b20367_m1	R	-261	-241	TGACAAACGGACGGTCTGAAT	11.5	2.8e-07	-15088	6553		SMc01200																							SMc02866	3	219195	219845	R	1231822	-	SMc02866	NP_384297.1	216	COG1309	K	transcriptional regulator	191
SM_b20367	R	SM_b20367_m1	R	-95	-75	AGACCGACGGTCGGTCTAATG	20.4	1.4e-10	-22689	9854		SMc01202																							SMc02782	3	8697	11132	D	1231637	gyrB	SMc02782	NP_384118.1	811	COG0187	L	DNA gyrase subunit B	12
SM_b20367	R	SM_b20367_m1	R	-91	-71	TTATAGACCGACGGTCGGTCT	18.4	1.6e-09	-20253	8796		SMc01208																							SMc02779	3	13646	14611	R	1231640	TRm19	SMc02779	NP_384121.1	321	COG3547	X	transposase	15
SMc02184	D	SM_b20367_m2	D	-52	-32	AGATCAACAGTCCGTCGATTA	6.7	6.1e-06	-12007	5215		SMc01209																							SMc02777	3	15706	16584	R	1231642	-	SMc02777	NP_384123.1	292	COG1802	K	transcriptional regulator	17
SMc02504	R	SM_b20367_m2	R	-31	-11	ATATAGACCGACGATTTATCC	6.1	8.2e-06	-11711	5086		SMc01215																							SMc02764	3	30167	31081	D	1231655	accD	SMc02764	NP_384136.1	304	COG0777	I	acetyl-CoA carboxylase subunit beta	30
SMc02503	D	SM_b20367_m2	D	-97	-77	ATATAGACCGACGATTTATCC	6.1	8.2e-06	-11711	5086		SMc01223																							SMc02753	3	48127	48528	R	1231666	-	SMc02753	NP_384147.1	133	COG2893	G	PTS system transporter subunit IIA	41
SM_b20154	R	SM_b20367_m2	R	-261	-241	TGACAAACGGACGGTCTGAAT	11.8	3.6e-07	-14837	6444		SMc01225																							SMc02647	3	1173182	1173595	R	1232721	-	SMc02647	NP_385183.1	137	COG0640	K	transcriptional regulator	1081
SM_b20367	R	SM_b20367_m2	R	-95	-75	AGACCGACGGTCGGTCTAATG	16.6	9.8e-09	-18441	8009		SMc01231																							SMc02634	3	1185444	1187447	R	1232733	-	SMc02634	NP_385195.1	667	COG3211	R	hypothetical protein SMc02634	1093
SM_b20367	R	SM_b20367_m2	R	-91	-71	TTATAGACCGACGGTCGGTCT	19.9	1.2e-10	-22844	9921		SMc01235																							SMc02603	3	1192189	1193427	D	1232737	-	SMc02603	NP_385199.1	412	COG2814	G	transport transmembrane protein	1097
SMc02504	R	SM_b20367_m3	R	-33	-13	ATAGACCGACGATTTATCCAT	9.1	1.3e-06	-13553	5886		SMc01260																							SMc02584	3	72733	73317	R	1231690	actR	SMc02584	NP_384171.1	194	COG4567	TK	transcriptional regulator	65
SMc02503	D	SM_b20367_m3	D	-95	-75	ATAGACCGACGATTTATCCAT	9.1	1.3e-06	-13553	5886		SMc01269																							SMc02523	3	3268382	3269278	R	1234696	-	SMc02523	NP_387118.1	298	COG0583	K	transcriptional regulator	3022
SM_b20154	R	SM_b20367_m3	R	-259	-239	GTTGACAAACGGACGGTCTGA	10.2	6.7e-07	-14216	6174		SMc01283																							SMc02503	3	3289155	3290258	D	1234716	-	SMc02503	NP_387138.1	367	COG1748	E	hypothetical protein SMc02503	3042
SM_b20367	R	SM_b20367_m3	R	-93	-73	ATAGACCGACGGTCGGTCTAA	24.7	4.5e-13	-28430	12347		SMc01285																							SMc02404	3	1156180	1157064	D	1232703	dapA	SMc02404	NP_385165.1	294	COG0329	EM	dihydrodipicolinate synthase	1063
SM_b21177	R	SM_b20367_m3	R	-44	-24	GGAGACCGGTCATCGGTATGA	8.8	1.6e-06	-13346	5796		SMc01287																							SMc02305	3	677941	679233	D	1232247	murA	SMc02305	NP_384715.1	430	COG0766	M	UDP-N-acetylglucosamine 1-carboxyvinyltransferase	611
SMa0355	D	SM_b20367_m4	D	-64	-55	GAATTAGAGC	11.0	5.4e-06	-12129	5268		SMc01289																							SMc02223	3	584615	585271	R	1232165	-	SMc02223	NP_384634.1	218	COG2932	X	transcriptional regulator	529
SMc02184	D	SM_b20367_m5	D	-52	-32	AGATCAACAGTCCGTCGATTA	6.6	5.9e-06	-12041	5229		SMc01292																							SMc02160	3	536019	537329	D	1232121	-	SMc02160	NP_384592.2	436	COG0628	R	ABC transporter permease	487
SMc02504	R	SM_b20367_m5	R	-31	-11	ATATAGACCGACGATTTATCC	6.6	5.9e-06	-12041	5229		SMc01294																							SMc02145	3	567841	568446	D	1232146	-	SMc02145	NP_384616.1	201			signal peptide protein	511
SMc02503	D	SM_b20367_m5	D	-97	-77	ATATAGACCGACGATTTATCC	6.6	5.9e-06	-12041	5229		SMc01296																							SMc02098	3	1610658	1611218	D	1233151	frr	SMc02098	NP_385604.1	186	COG0233	J	ribosome recycling factor	1503
SM_b20154	R	SM_b20367_m5	R	-261	-241	TGACAAACGGACGGTCTGAAT	12.5	2.1e-07	-15376	6678		SMc01299																							SMc02030	3	2734709	2735614	R	1234210	-	SMc02030	NP_386648.1	301	COG0583	K	transcriptional regulator	2552
SM_b20367	R	SM_b20367_m5	R	-95	-75	AGACCGACGGTCGGTCTAATG	18.8	8.8e-10	-20851	9056		SMc01306																							SMc01918	3	1382176	1383480	D	1232918	nuoF1	SMc01918	NP_385376.1	434	COG1894	C	NADH dehydrogenase I subunit F	1275
SM_b20367	R	SM_b20367_m5	R	-91	-71	TTATAGACCGACGGTCGGTCT	18.4	1.4e-09	-20387	8854		SMc01309																							SMc01914	3	1379211	1379816	D	1232914	nuoC1	SMc01914	NP_385372.1	201	COG0852	C	NADH dehydrogenase subunit C	1271
SMc00983	R	SM_b20387_m1	R	-296	-284	GATGTCGTCTATT	10.0	2.9e-06	-12751	5538		SMc01310																							SMc01768	3	1314450	1314962	D	1232850	-	SMc01768	NP_385312.1	170	COG1846	K	transcriptional regulator	1211
SM_b20387	R	SM_b20387_m1	R	-39	-27	TTTGTCTTCTATT	15.2	8.3e-08	-16304	7081		SMc01316																							SMc01605	3	2394145	2395248	D	1233883	-	SMc01605	NP_386323.1	367	COG1840	P	periplasmic binding ABC transporter protein	2226
SMc00983	R	SM_b20387_m2	R	-298	-284	GATGTCGTCTATTGG	7.4	4.8e-06	-12247	5319		SMc01318																							SMc01578	3	2515844	2517046	R	1233992	aatA	SMc01578	NP_386431.1	400	COG0436	E	aspartate aminotransferase	2334
SM_b20387	R	SM_b20387_m2	R	-41	-27	TTTGTCTTCTATTAG	18.6	2.4e-09	-19848	8620		SMc01321																							SMc01504	3	2624350	2625144	D	1234104	-	SMc01504	NP_386543.1	264	COG0784	T	two-component response regulator	2447
SMc00831	R	SM_b20387_m3	R	-177	-165	GCAAAAAATACCA	9.9	8.1e-06	-11724	5092		SMc01327																							SMc01357	3	1426831	1426986	D	1232955	-	SMc01357	NP_385413.1	51			hypothetical protein SMc01357	1312
SM_b20387	R	SM_b20387_m3	R	-18	-6	TTCAAAAATTCCA	12.1	7.7e-07	-14077	6114		SMc01330																							SMc01296	3	1485285	1485590	D	1233021	rpsN	SMc01296	NP_385475.1	101	COG0199	J	30S ribosomal protein S14	1374
SMc00825	R	SM_b20387_m4	R	-120	-105	CCCTCAAAAAAACTAG	9.1	8.0e-06	-11736	5097		SMc01331																							SMc01225	3	1699144	1700052	R	1233220	-	SMc01225	NP_385672.1	302	COG0583	K	transcriptional regulator	1571
SMc03879	R	SM_b20387_m4	R	-192	-177	CTCTGAAAAATACAAT	10.6	2.6e-06	-12860	5585		SMc01333																							SMc01167	3	399330	400853	D	1232002	dnaA	SMc01167	NP_384474.1	507	COG0593	L	chromosomal replication initiation protein	369
SM_b20387	R	SM_b20387_m4	R	-19	-4	TTTTCAAAAATTCCAC	14.8	5.7e-08	-16680	7244		SMc01336																							SMc01164	3	385924	386778	R	1231989	-	SMc01164	NP_384461.1	284	COG1737	K	hypothetical protein SMc01164	356
SMc02425	R	SM_b20387_m5	R	-98	-79	TATTGTCTACAATATGAAAG	6.5	3.1e-06	-12684	5509		SMc01347																							SMc01018	3	1542251	1544311	R	1233086	parE	SMc01018	NP_385539.1	686	COG0187	L	DNA topoisomerase IV subunit B	1438
SMa0557	R	SM_b20387_m5	R	-52	-33	TATTGGCGTCTAATCGAAAC	5.1	6.0e-06	-12024	5222		SMc01350																							SMc00878	3	908239	908979	D	1232469	-	SMc00878	NP_384934.1	246	COG2771	K	transcriptional regulator	830
SM_b20387	R	SM_b20387_m5	R	-45	-26	TTTTGTCTTCTATTAGAAGA	24.3	5.0e-13	-28324	12301		SMc01354																							SMc00872	3	916431	916877	D	1232475	atpI	SMc00872	NP_384940.2	148	COG5336	C	FOF1 ATP synthase, subunit I transmembrane protein	836
SMc02184	D	SM_b20392_m1	D	-67	-39	CAAACTCCTAATCAGAGATCAACAGTCCG	1.7	3.6e-06	-12535	5444		SMc01357																							SMc00825	3	845337	846710	R	1232411	gsh1	SMc00825	NP_384876.2	457	COG3572	H	glutamate--cysteine ligase precursor protein	772
SMc02470	D	SM_b20392_m1	D	-76	-48	TTAATTCGTATTCCTGCTAAATGATTTGA	0.3	6.6e-06	-11928	5180		SMc01403																							SMc00593	3	1266686	1267198	R	1232806	-	SMc00593	NP_385268.1	170	COG2318	S	hypothetical protein SMc00593	1167
SMa1749	R	SM_b20392_m1	R	-129	-101	TTGACTCGTATTCTCATTTTATTTGCAAA	2.8	2.3e-06	-12983	5638		SMc01406																							SMc00581	3	1250116	1251066	R	1232795	-	SMc00581	NP_385257.1	316	COG0760	O	hypothetical protein SMc00581	1155
SM_b20129	D	SM_b20392_m1	D	-250	-222	GAAAATCGTATTATCGGCTACCAAGCAGG	2.0	3.2e-06	-12652	5495		SMc01428																							SMc00494	3	1916588	1916830	D	1233438	-	SMc00494	NP_385879.1	80	COG1828	F	phosphoribosylformylglycinamidine synthase subunit PurS	1779
SM_b20347	R	SM_b20392_m1	R	-152	-124	TATACTCATTGACTCATCATACCAGTTCC	11.8	2.9e-08	-17356	7538		SMc01431																							SMc00256	3	1824818	1825825	R	1233344	-	SMc00256	NP_385790.1	335	COG4977	K	transcriptional regulator	1689
SM_b20392	R	SM_b20392_m1	R	-106	-78	CTAACTCAGATACTCATTATACCAGTTTC	22.6	2.1e-11	-24586	10678		SMc01495																							SMc00234	3	1800397	1802289	D	1233318	ppiD	SMc00234	NP_385765.1	630	COG0760	O	peptidyl-prolyl cis-trans isomerase	1664
SM_b20426	D	SM_b20426_m1	D	-148	-135	TTACATTGTCAATT	14.6	4.5e-08	-16917	7347		SMc01504																							SMc00155	3	2012405	2013778	R	1233518	aroF	SMc00155	NP_385959.1	457	COG3200	E	DAHP synthetase prtein	1859
SMc00654	D	SM_b20426_m2	D	-142	-115	TTTAACATTTTCGATACACCTTGCCAGA	0.7	2.6e-06	-12860	5585		SMc01524																							SM_b21494	3	1415494	1416561	D	1237655	ocd	SM_b21494	NP_437863.1	355	COG2423	E	ornithine cyclodeaminase (plasmid)	5972
SM_b20426	D	SM_b20426_m2	D	-150	-123	TTTTACATTGTCAATTGAGCTGATTTTG	13.0	8.3e-09	-18607	8081		SMc01534																							SM_b21491	3	1413437	1413967	R	1237652	-	SM_b21491	NP_437860.2	176			hypothetical protein SM_b21491 (plasmid)	5969
SMc01585	D	SM_b20426_m3	D	-253	-225	GCCAATTCAAAATAAACCCATCACTCTTA	9.4	4.3e-06	-12357	5367		SMc01535																							SM_b21464	3	1391174	1391947	D	1237622	-	SM_b21464	NP_437830.1	257	COG2188	K	GntR family transcriptional regulator (plasmid)	5939
SM_b20129	D	SM_b20426_m3	D	-386	-358	GGCAATTTCATAATAGATATATATTGTTT	8.7	6.6e-06	-11928	5180		SMc01556																							SM_b21272	3	845977	847047	D	1237107	-	SM_b21272	NP_437316.1	356	COG1609	K	LacI family transcriptional regulator (plasmid)	5428
SM_b20426	D	SM_b20426_m3	D	-166	-138	GACATTGGGTGCTCACTTTTACATTGTCA	17.7	1.6e-09	-20253	8796		SMc01563																							SM_b20899	3	1306775	1307767	D	1237525	idhA	SM_b20899	NP_437734.1	330	COG0673	R	myo-inositol dehydrogenase (plasmid)	5843
SM_b20426	D	SM_b20426_m3	D	-141	-113	GTCAATTGAGCTGATTTTGATCACTGTTC	15.9	1.3e-08	-18158	7886		SMc01569																							SM_b20894	3	1301299	1302819	R	1237519	gguA	SM_b20894	NP_437728.1	506	COG1129	G	sugar uptake ABC transporter ATP-binding protein (plasmid)	5837
SM_b21706	R	SM_b20426_m3	R	-271	-243	CACAATGAGAAAACCTTTTCTCAATGCGA	8.8	6.2e-06	-11991	5208		SMc01570																							SM_b20749	3	1538076	1539539	D	1237773	uxuB	SM_b20749	NP_437981.1	487	COG0246	G	D-mannonate oxidoreductase (plasmid)	6089
SM_b20426	D	SM_b20426_m4	D	-148	-135	TTACATTGTCAATT	15.7	1.8e-09	-20135	8745		SMc01578																							SM_b20556	3	580645	581325	D	1236866	-	SM_b20556	NP_437075.2	226	COG0310	P	hypothetical protein SM_b20556 (plasmid)	5188
SM_b21299	D	SM_b20426_m4	D	-42	-29	TAACATTGCCAAAA	9.5	8.1e-06	-11724	5092		SMc01579																							SM_b20537	3	561216	562244	R	1236847	-	SM_b20537	NP_437056.1	342	COG1609	K	transcriptional regulator (plasmid)	5169
SM_b20426	D	SM_b20426_m5	D	-133	-117	AGCTGATTTTGATCACT	10.7	2.9e-06	-12751	5538		SMc01585																							SM_b20426	3	440994	442274	D	1236743	-	SM_b20426	NP_436952.1	426	COG1167	KE	transcriptional regulator (plasmid)	5063
SMa0097	R	SM_b20441_m1	R	-124	-94	AGCGAATTGGCCAAGCCAACTGCAACCTTTC	0.7	6.8e-06	-11899	5167		SMc01588																							SM_b20292	3	299408	300391	R	1236613	-	SM_b20292	NP_436822.1	327	COG2358	R	immunogenic protein (plasmid)	4933
SMa0101	D	SM_b20441_m1	D	-93	-63	AGCGAATTGGCCAAGCCAACTGCAACCTTTC	0.7	6.8e-06	-11899	5167		SMc01592																							SM_b20276	3	280415	281305	D	1236597	-	SM_b20276	NP_436806.1	296	COG1737	K	transcriptional regulator (plasmid)	4917
SM_b20441	D	SM_b20441_m1	D	-60	-30	GGGGAATTGGTATGACCACTTGGCCACTTGG	27.6	5.4e-14	-30550	13268		SMc01593																							SM_b20106	3	116824	117555	D	1236397	-	SM_b20106	NP_436646.1	243	COG2186	K	transcriptional regulator (plasmid)	4756
SMc00829	R	SM_b20441_m2	R	-77	-47	TATCAAGTGGTCAAATTGATTGTCCACTCTG	7.1	7.4e-07	-14117	6131		SMc01605																							SMa5030	3	730316	730981	D	6435274	-	SMa5030	YP_002000352.1	221	COG1309	K	TetR family transcriptional regulator (plasmid)	4091
SMc00830	D	SM_b20441_m2	D	-136	-106	TATCAAGTGGTCAAATTGATTGTCCACTCTG	7.1	7.4e-07	-14117	6131		SMc01610																							SMa2387	3	1348373	1349071	D	1236327	-	SMa2387	NP_436536.2	232	COG1309	K	TetR family transcriptional regulator (plasmid)	4645
SMa0097	R	SM_b20441_m2	R	-124	-94	AGCGAATTGGCCAAGCCAACTGCAACCTTTC	3.7	3.6e-06	-12535	5444		SMc01615																							SMa2303	3	1283423	1284649	R	1236277	-	SMa2303	NP_436486.1	408	COG1940	KG	ROK family transcriptional regulator (plasmid)	4593
SMa0101	D	SM_b20441_m2	D	-93	-63	AGCGAATTGGCCAAGCCAACTGCAACCTTTC	3.7	3.6e-06	-12535	5444		SMc01630																							SMa2163	3	1218608	1219489	D	1236211	-	SMa2163	NP_436421.2	293	COG4977	K	AraC family transcriptional regulator (plasmid)	4533
SM_b20441	D	SM_b20441_m2	D	-60	-30	GGGGAATTGGTATGACCACTTGGCCACTTGG	27.2	7.1e-14	-30276	13149		SMc01651																							SMa2107	3	1189053	1189958	R	1236185	-	SMa2107	NP_436395.1	301	COG0583	K	GstR transcriptional regulator (plasmid)	4508
SMc00638	R	SM_b20441_m3	R	-82	-73	TCGACGCATA	10.4	7.2e-06	-11841	5143		SMc01664																							SMa2027	3	1147165	1148058	R	1236145	-	SMa2027	NP_436355.1	297	COG0583	K	LysR family transcriptional regulator (plasmid)	4467
SMa0097	R	SM_b20441_m4	R	-124	-94	AGCGAATTGGCCAAGCCAACTGCAACCTTTC	0.6	7.0e-06	-11870	5155		SMc01700																							SMa1987	3	1127616	1128455	D	1236125	-	SMa1987	NP_436335.1	279	COG0583	K	LysR family transcriptional regulator (plasmid)	4448
SMa0101	D	SM_b20441_m4	D	-93	-63	AGCGAATTGGCCAAGCCAACTGCAACCTTTC	0.6	7.0e-06	-11870	5155		SMc01719																							SMa1954	3	1109860	1110843	D	1236106	-	SMa1954	NP_436316.1	327	COG0583	K	LysR family transcriptional regulator (plasmid)	4429
SM_b20441	D	SM_b20441_m4	D	-60	-30	GGGGAATTGGTATGACCACTTGGCCACTTGG	27.5	6.2e-14	-30412	13208		SMc01723																							SMa1893	3	1075895	1076770	D	1236077	-	SMa1893	NP_436287.1	291	COG0583	K	LysR family transcriptional regulator (plasmid)	4400
SMa0097	R	SM_b20441_m5	R	-109	-98	AATTGGCCAAGC	10.1	7.7e-06	-11774	5114		SMc01726																							SMa1602	3	893872	894747	R	1235909	-	SMa1602	NP_436119.2	291	COG0583	K	LysR family transcriptional regulator (plasmid)	4237
SMa0101	D	SM_b20441_m5	D	-89	-78	AATTGGCCAAGC	10.1	7.7e-06	-11774	5114		SMc01756																							SMa1480	3	814015	814902	D	1235842	-	SMa1480	NP_436052.2	295	COG0583	K	LysR family transcriptional regulator (plasmid)	4169
SM_b20441	D	SM_b20441_m5	D	-43	-32	ACTTGGCCACTT	12.2	6.1e-07	-14310	6215		SMc01762																							SMa1442	3	795334	796098	R	1235824	-	SMa1442	NP_436034.1	254	COG2186	K	GntR family transcriptional regulator (plasmid)	4151
SMa0179	R	SM_b20455_m1	R	-59	-39	TTTTTATCGTTTAATAATAAT	4.2	9.8e-06	-11533	5009		SMc01768																							SMa1067	3	583446	584192	D	1235614	-	SMa1067	NP_435824.1	248	COG0664	T	transcriptional regulator (plasmid)	3941
SM_b20455	R	SM_b20455_m1	R	-94	-74	TGTGTATCGATCATTACAGAA	22.6	1.4e-11	-24992	10854		SMc01769																							SMa0815	3	445895	447520	R	1235479	nifA	SMa0815	NP_435689.2	541	COG3604	KT	Fis family transcriptional regulator (plasmid)	3803
SM_b20455	R	SM_b20455_m1	R	-37	-17	TCTGTAGCGATTGATAAATAT	15.4	1.4e-08	-18084	7854		SMc01777																							SMa0347	3	188006	188893	D	1235412	-	SMa0347	NP_435433.1	295	COG0583	K	LysR family transcriptional regulator (plasmid)	3550
SM_b20456	D	SM_b20455_m1	D	-92	-72	TCTGTAGCGATTGATAAATAT	15.4	1.4e-08	-18084	7854		SMc01781																							SMa0319	3	177973	178974	D	1235397	-	SMa0319	NP_435418.1	333	COG4977	K	AraC family transcriptional regulator (plasmid)	3534
SM_b20456	D	SM_b20455_m1	D	-35	-15	TGTGTATCGATCATTACAGAA	22.6	1.4e-11	-24992	10854		SMc01782																							SMc04405	2	3611782	3612894	D	1235004	leuB	SMc04405	NP_387416.1	370	COG0473	CE	3-isopropylmalate dehydrogenase	3328
SMc01495	R	SM_b20455_m3	R	-151	-130	AATTTTACCGTTTGATAAAAAA	5.7	2.0e-06	-13122	5699		SMc01787																							SMc04305	2	2121850	2122377	R	1233624	cobU	SMc04305	NP_386065.1	175	COG2087	H	adenosylcobinamide kinase/adenosylcobinamide-phosphate guanylyltransferase	1966
SMa0179	R	SM_b20455_m3	R	-59	-38	ATTTTTATCGTTTAATAATAAT	4.4	3.9e-06	-12455	5409		SMc01801																							SMc04286	2	2107028	2107987	D	1233613	-	SMc04286	NP_386054.1	319	COG0730	S	hypothetical protein SMc04286	1955
SM_b20455	R	SM_b20455_m3	R	-94	-73	TTGTGTATCGATCATTACAGAA	23.2	9.5e-12	-25380	11022		SMc01819																							SMc04277	2	2101114	2101590	R	1233606	-	SMc04277	NP_386047.1	158	COG0764	I	(3R)-hydroxymyristoyl-ACP dehydratase	1948
SM_b20455	R	SM_b20455_m3	R	-37	-16	TTCTGTAGCGATTGATAAATAT	19.5	3.6e-10	-21745	9444		SMc01834																							SMc04230	2	2055212	2055565	R	1233565	-	SMc04230	NP_386006.1	117	COG3169	S	transmembrane signal peptide protein	1906
SM_b20456	D	SM_b20455_m3	D	-93	-72	TTCTGTAGCGATTGATAAATAT	19.5	3.6e-10	-21745	9444		SMc01845																							SMc04000	2	2996919	2997122	D	1234460	-	SMc04000	NP_386890.1	67	COG5481	S	hypothetical protein SMc04000	2793
SM_b20456	D	SM_b20455_m3	D	-36	-15	TTGTGTATCGATCATTACAGAA	23.2	9.5e-12	-25380	11022		SMc01852																							SMc03998	2	2996119	2996379	D	1234458	-	SMc03998	NP_386888.1	86	COG0640	K	transcriptional regulator	2791
SM_b20455	R	SM_b20455_m4	R	-93	-72	TTTGTGTATCGATCATTACAGA	20.3	5.9e-11	-23553	10229		SMc01871																							SMc03978	2	2973395	2975377	D	1234438	tkt2	SMc03978	NP_386868.1	660	COG0021	G	transketolase	2771
SM_b20455	R	SM_b20455_m4	R	-36	-15	TTTCTGTAGCGATTGATAAATA	16.3	8.8e-09	-18549	8056		SMc01875																							SMc03941	2	3092120	3092344	R	1234540	-	SMc03941	NP_386969.1	74			hypothetical protein SMc03941	2872
SM_b20456	D	SM_b20455_m4	D	-94	-73	TTTCTGTAGCGATTGATAAATA	16.3	8.8e-09	-18549	8056		SMc01876																							SMc03878	2	3545701	3546426	R	1234955	phbB	SMc03878	NP_387367.1	241	COG1028	IQR	acetoacetyl-CoA reductase	3279
SM_b20456	D	SM_b20455_m4	D	-37	-16	TTTGTGTATCGATCATTACAGA	20.3	5.9e-11	-23553	10229		SMc01882																							SMc03832	2	3499149	3499652	R	1234909	-	SMc03832	NP_387321.1	167	COG5342	R	signal peptide protein	3233
SMa0089	D	SM_b20455_m5	D	-111	-95	GTATATGTGAGTTGACA	10.0	3.7e-06	-12507	5432		SMc01885																							SMc03829	2	3495451	3496329	R	1234906	-	SMc03829	NP_387318.2	292	COG4120	R	ABC transporter permease	3230
SM_b20154	R	SM_b20455_m5	R	-245	-229	GCATTTTTCTGTTGACA	10.2	3.5e-06	-12563	5456		SMc01903																							SMc03775	2	3441067	3442197	D	1234852	obgE	SMc03775	NP_387265.3	376	COG0536	DL	GTPase ObgE	3176
SM_b20455	R	SM_b20455_m5	R	-48	-32	AAATATATCGCTTGACA	15.0	3.7e-08	-17112	7432		SMc01904																							SMc03770	2	3438988	3439359	D	1234848	rplU	SMc03770	NP_387261.1	123	COG0261	J	50S ribosomal protein L21	3172
SM_b20456	D	SM_b20455_m5	D	-77	-61	AAATATATCGCTTGACA	15.0	3.7e-08	-17112	7432		SMc01908																							SMc03170	2	3131057	3131896	D	1234578	-	SMc03170	NP_387007.1	279	COG2207	K	transcriptional regulator	2910
SM_b20494	D	SM_b20494_m1	D	-58	-47	AGGCGGATAATG	10.6	6.5e-06	-11944	5187		SMc01909																							SMc03027	2	724938	725318	D	1232298	flgB	SMc03027	NP_384765.1	126	COG1815	N	flagellar basal body rod protein FlgB	661
SM_b20494	D	SM_b20494_m2	D	-52	-23	ATAATGGTGCATAGTCCGGCATCACTATCC	21.0	7.6e-11	-23300	10119		SMc01911																							SMc02796	2	3651162	3652427	R	1235033	rho	SMc02796	NP_387445.1	421	COG1158	K	transcription termination factor Rho	3357
SMc04169	D	SM_b20494_m3	D	-396	-370	GACATCCGAATTCTGCAAAGGTGAAAA	9.8	2.0e-06	-13122	5699		SMc01914																							SMc02695	2	2544576	2545679	D	1234024	-	SMc02695	NP_386463.1	367	COG0012	J	GTP-dependent nucleic acid-binding protein EngD	2366
SMa1705	D	SM_b20494_m3	D	-32	-6	TTCATTGGTAACAGGCTGCGGAGAAGA	7.5	8.2e-06	-11711	5086		SMc01918																							SMc02686	2	2535497	2536429	D	1234015	prsA	SMc02686	NP_386454.1	310	COG0462	FE	ribose-phosphate pyrophosphokinase	2357
SM_b20494	D	SM_b20494_m3	D	-120	-94	TTCTTCCTTCGTGTGGTGCGCCGAAGC	9.1	3.1e-06	-12684	5509		SMc01935																							SMc02596	2	93287	94138	D	1231708	-	SMc02596	NP_384183.1	283	COG0583	K	transcriptional regulator	77
SM_b20494	D	SM_b20494_m3	D	-35	-9	GGCATCACTATCCGGAAGAGTCGAATA	22.9	8.0e-13	-27854	12097		SMc01945																							SMc02520	2	3271269	3272780	D	1234699	glpD	SMc02520	NP_387121.1	503	COG0578	C	glycerol-3-phosphate dehydrogenase	3025
SM_b20494	D	SM_b20494_m4	D	-56	-25	GCGGATAATGGTGCATAGTCCGGCATCACTAT	32.5	9.7e-17	-36872	16013		SMc01974																							SMc02504	2	3288599	3289051	R	1234715	-	SMc02504	NP_387137.1	150	COG1522	K	transcriptional regulator	3041
SMa0247	D	SM_b20494_m5	D	-128	-99	GGTCTTGGTGGCGTATCAGACTTTACTTAC	-1.5	9.6e-06	-11554	5018		SMc01975																							SMc02498	2	3295122	3295688	R	1234721	atpH	SMc02498	NP_387143.2	188	COG0712	C	F0F1 ATP synthase subunit delta	3047
SM_b20494	D	SM_b20494_m5	D	-53	-24	GATAATGGTGCATAGTCCGGCATCACTATC	32.4	1.1e-16	-36746	15959		SMc02022																							SMc02366	2	1113918	1114619	D	1232665	-	SMc02366	NP_385128.1	233	COG0745	TK	transcriptional regulator	1025
SM_b20347	R	SM_b20509_m1	R	-147	-135	ACTCATCATACCA	11.7	1.1e-06	-13720	5959		SMc02030																							SMc02306	2	679388	679828	D	1232248	-	SMc02306	NP_384716.1	146			hypothetical protein SMc02306	612
SM_b20509	D	SM_b20509_m1	D	-138	-126	AAAGATCATACTT	10.9	1.6e-06	-13346	5796		SMc02053																							SMc02242	2	606242	606640	D	1232183	-	SMc02242	NP_384652.1	132			hypothetical protein SMc02242	547
SMc03140	R	SM_b20509_m2	R	-17	-5	CCTCTCTCCCAAT	11.5	1.5e-06	-13410	5824		SMc02058																							SMc02170	2	525199	526281	D	1232112	-	SMc02170	NP_384583.1	360	COG1172	G	ABC transporter permease	478
SMc04410	D	SM_b20509_m2	D	-100	-88	GCTCTCTCCCCGG	11.4	1.6e-06	-13346	5796		SMc02059																							SMc02146	2	566715	567749	D	1232145	-	SMc02146	NP_384615.1	344	COG0226	P	phosphate-binding periplasmic protein	510
SM_b20509	D	SM_b20509_m2	D	-188	-176	TTTCTCTCCCTAT	14.0	1.1e-07	-16023	6959		SMc02062																							SMc02119	2	1590785	1591978	R	1233130	aapQ	SMc02119	NP_385583.1	397	COG4597	E	general L-amino acid transport permease ABC transporter protein	1482
SM_b21102	R	SM_b20509_m2	R	-18	-6	CGTCTCTCCCAGA	9.8	4.8e-06	-12247	5319		SMc02063																							SMc02103	2	1606147	1606611	R	1233146	-	SMc02103	NP_385599.1	154	COG0251	V	hypothetical protein SMc02103	1498
SM_b20896	D	SM_b20509_m2	D	-346	-334	GATCTCTCCCTGA	9.4	6.3e-06	-11975	5201		SMc02073																							SMc02093	2	1616710	1617774	D	1233156	lpxD	SMc02093	NP_385609.1	354	COG1044	M	UDP-3-O	1508
SMc00620	R	SM_b20509_m3	R	-15	-5	CTTCACCTCGG	10.8	4.7e-06	-12268	5328		SMc02083																							SMc02053	2	1664774	1666192	R	1233196	-	SMc02053	NP_385649.1	472	COG1206	J	tRNA (uracil-5-)-methyltransferase Gid	1548
SM_b20509	D	SM_b20509_m3	D	-63	-53	CGTCACCTCGG	10.5	6.5e-06	-11944	5187		SMc02093																							SMc02022	2	2725662	2726654	R	1234202	-	SMc02022	NP_386640.1	330	COG1879	G	transcriptional regulator	2544
SMc00488	D	SM_b20509_m4	D	-378	-346	TTCCTCATCCCTGTGCTCGTCACAGAGATGAGG	-13.7	9.6e-06	-11554	5018		SMc02094																							SMc01882	2	2324257	2324973	R	1233826	-	SMc01882	NP_386266.1	238	COG1296	E	hypothetical protein SMc01882	2169
SMc00652	R	SM_b20509_m4	R	-168	-136	GACATCACATTTGGTAAACCGATTGTTAAGATG	-10.2	3.2e-06	-12652	5495		SMc02098																							SMc01834	2	2658868	2659410	R	1234134	-	SMc01834	NP_386573.1	180	COG0678	O	hypothetical protein SMc01834	2477
SMc00651	D	SM_b20509_m4	D	-233	-201	GACATCACATTTGGTAAACCGATTGTTAAGATG	-10.2	3.2e-06	-12652	5495		SMc02101																							SMc01782	2	1327935	1328471	D	1232864	-	SMc01782	NP_385326.1	178	COG5452	S	hypothetical protein SMc01782	1225
SMa0179	R	SM_b20509_m4	R	-73	-41	TTTATCGTTTAATAATAATGGGCTACAGTGATG	-11.2	4.6e-06	-12289	5337		SMc02103																							SMc01781	2	1327291	1327797	R	1232863	-	SMc01781	NP_385325.1	168	COG2913	M	hypothetical protein SMc01781	1224
SM_b20509	D	SM_b20509_m4	D	-137	-105	AAGATCATACTTGTCAATTGCTCTGGTATGATG	31.2	3.6e-15	-33258	14444		SMc02117																							SMc01777	2	1322709	1323170	D	1232859	ribH	SMc01777	NP_385321.1	153	COG0054	H	6,7-dimethyl-8-ribityllumazine synthase	1220
SMc00652	R	SM_b20509_m5	R	-170	-136	GACATCACATTTGGTAAACCGATTGTTAAGATGAT	-7.8	7.0e-07	-14172	6155		SMc02118																							SMc01756	2	1301147	1302934	D	1232838	aspS	SMc01756	NP_385300.1	595	COG0173	J	aspartyl-tRNA synthetase	1199
SMc00651	D	SM_b20509_m5	D	-233	-199	GACATCACATTTGGTAAACCGATTGTTAAGATGAT	-7.8	7.0e-07	-14172	6155		SMc02119																							SMc01664	2	2466631	2467476	D	1233942	-	SMc01664	NP_386382.1	281	COG0583	K	transcriptional regulator	2285
SMa0179	R	SM_b20509_m5	R	-75	-41	TTTATCGTTTAATAATAATGGGCTACAGTGATGAA	-10.4	1.6e-06	-13346	5796		SMc02140																							SMc01535	2	2595534	2596067	D	1234070	-	SMc01535	NP_386509.1	177	COG0645	R	hypothetical protein SMc01535	2413
SM_b20509	D	SM_b20509_m5	D	-137	-103	AAGATCATACTTGTCAATTGCTCTGGTATGATGAA	32.1	1.2e-15	-34356	14921		SMc02141																							SMc01524	2	2609119	2610174	R	1234081	-	SMc01524	NP_386520.1	351	COG2355	E	dipeptidase	2424
SM_b21008	R	SM_b20509_m5	R	-197	-163	TCCCTCATTCCTGCGCTTGTCACAGGAATGAGGAT	-13.2	4.0e-06	-12429	5398		SMc02145																							SMc01354	2	1427873	1428577	D	1232958	-	SMc01354	NP_385416.1	234	COG2220	G	metal-dependent hydrolase	1315
SMc03131	R	SM_b20516_m2	R	-363	-351	CCAGAGCCCCGCC	9.5	9.1e-06	-11607	5041		SMc02146																							SMc01336	2	1441634	1444408	R	1232976	rne	SMc01336	NP_385434.1	924	COG1530	J	ribonuclease E protein	1333
SMa1948	D	SM_b20516_m3	D	-339	-329	AACGCCCTCGA	10.4	6.4e-06	-11959	5194		SMc02147																							SMc01333	2	1449419	1450447	D	1232979	prfB	SMc01333	NP_385437.1	342	COG1186	J	peptide chain release factor 2	1336
SM_b20516	D	SM_b20516_m3	D	-14	-4	ATCGCTCTCGA	11.2	3.2e-06	-12652	5495		SMc02160																							SMc01331	2	1451534	1452307	R	1232981	ppnK	SMc01331	NP_385439.1	257	COG0061	F	inorganic polyphosphate/ATP-NAD kinase	1338
SM_b20516	D	SM_b20516_m4	D	-56	-40	CTTGAGGGCGTCAGAGT	20.6	3.8e-11	-23993	10420		SMc02163																							SMc01310	2	1478593	1478901	D	1233007	rpsJ	SMc01310	NP_385461.1	102	COG0051	J	30S ribosomal protein S10	1360
SM_b20899	D	SM_b20516_m4	D	-161	-145	CTTGACGGCGCCAAGGC	9.1	4.0e-06	-12429	5398		SMc02166																							SMc01309	2	1479024	1479710	D	1233008	rplC	SMc01309	NP_385462.1	228	COG0087	J	50S ribosomal protein L3	1361
SM_b20525	D	SM_b20525_m1	D	-53	-32	TCCTAGGACGATCGTCCTAGGA	23.3	2.2e-12	-26843	11658		SMc02170																							SMc01287	2	1490735	1491103	D	1233030	rpsM	SMc01287	NP_385484.1	122	COG0099	J	30S ribosomal protein S13	1383
SM_b20525	D	SM_b20525_m2	D	-53	-32	TCCTAGGACGATCGTCCTAGGA	23.6	3.4e-12	-26407	11469		SMc02172																							SMc01285	2	1491823	1492833	D	1233032	rpoA	SMc01285	NP_385486.1	336	COG0202	K	DNA-directed RNA polymerase subunit alpha	1385
SMc02274	D	SM_b20525_m3	D	-236	-217	TTAACTCATAGTGCCTAGCT	9.6	8.7e-06	-11652	5060		SMc02174																							SMc01283	2	1492879	1493304	D	1233033	rplQ	SMc01283	NP_385487.1	141	COG0203	J	50S ribosomal protein L17	1386
SMc00964	R	SM_b20525_m3	R	-28	-9	CTACCTCTTATTAGAAAGCG	9.7	7.9e-06	-11749	5102		SMc02175																							SMc01223	2	1701567	1702037	D	1233222	-	SMc01223	NP_385674.1	156	COG1522	K	transcriptional regulator	1573
SM_b20055	D	SM_b20525_m4	D	-77	-65	ATTAGGCCGATTG	11.3	1.7e-06	-13285	5770		SMc02181																							SMc01200	2	1728411	1728992	R	1233245	-	SMc01200	NP_385697.1	193	COG1376	M	hypothetical protein SMc01200	1596
SM_b20525	D	SM_b20525_m4	D	-52	-40	CCTAGGACGATCG	14.1	1.3e-07	-15856	6886		SMc02184																							SMc01165	2	383852	385804	R	1231988	iolC	SMc01165	NP_384460.1	650	COG0524	G	sugar kinase	355
SM_b20523	R	SM_b20525_m5	R	-179	-167	GTCATACCAGACG	10.0	6.7e-06	-11913	5174		SMc02223																							SMc01152	2	398138	398404	D	1232001	rpsT	SMc01152	NP_384473.1	88	COG0268	J	30S ribosomal protein S20	368
SM_b20525	D	SM_b20525_m5	D	-355	-343	GTCATACCAGACG	10.0	6.7e-06	-11913	5174		SMc02235																							SMc01010	2	1534693	1536678	D	1233078	thrS	SMc01010	NP_385531.1	661	COG0441	J	threonyl-tRNA synthetase	1430
SMc04115	R	SM_b20531_m1	R	-65	-53	AATGGTTACGCCG	9.6	6.8e-06	-11899	5167		SMc02240																							SMc00975	2	963594	965717	D	1232518	mcpU	SMc00975	NP_384983.2	707	COG0840	NT	chemoreceptor methyl-accepting chemotaxis transmembrane protein	879
SMc01431	R	SM_b20531_m1	R	-120	-108	GATGGTTACACCA	9.2	9.0e-06	-11618	5046		SMc02242																							SMc00964	2	976420	976983	R	1232529	-	SMc00964	NP_384994.1	187	COG1268	H	hypothetical protein SMc00964	890
SMc01615	R	SM_b20531_m1	R	-55	-43	AAAGGTAACATTC	10.1	4.9e-06	-12226	5310		SMc02246																							SMc00877	2	909133	909966	D	1232470	-	SMc00877	NP_384935.1	277	COG2197	TK	transcriptional regulator	831
SMa2107	R	SM_b20531_m1	R	-43	-31	AATTGTTACGTCT	10.3	4.3e-06	-12357	5367		SMc02264																							SMc00791	2	812854	813198	D	1232376	-	SMc00791	NP_384842.1	114	COG0251	V	hypothetical protein SMc00791	738
SMc03015	D	SM_b20531_m2	D	-214	-197	GCTCACGCATACGTGAAT	12.1	6.8e-07	-14201	6167		SMc02274																							SMc00683	2	2892160	2893242	R	1234364	-	SMc00683	NP_386795.1	360	COG1686	M	penicillin-binding protein	2698
SMc00646	D	SM_b20531_m2	D	-140	-123	TTTCACGACAGCGTGAAA	12.5	5.1e-07	-14489	6292		SMc02296																							SMc00643	2	2932696	2933994	R	1234404	purA	SMc00643	NP_386834.1	432	COG0104	F	adenylosuccinate synthetase	2737
SMc00820	R	SM_b20531_m3	R	-201	-171	CAGGGGACGGGTTTCTTCGTGCCCGCGAAAA	3.7	8.6e-06	-11664	5066		SMc02305																							SMc00609	2	1279209	1281323	D	1232822	dmsA	SMc00609	NP_385284.1	704	COG0243	C	anaerobic dimethyl sulfoxide reductase subunit A	1183
SMc00821	D	SM_b20531_m3	D	-44	-14	CAGGGGACGGGTTTCTTCGTGCCCGCGAAAA	3.7	8.6e-06	-11664	5066		SMc02306																							SMc00608	2	1278253	1279122	R	1232821	-	SMc00608	NP_385283.1	289	COG2961	J	hypothetical protein SMc00608	1182
SM_b20531	D	SM_b20531_m4	D	-46	-16	CATGTAACAAGTAGCGAAACTCGGCGAATTG	23.7	2.3e-12	-26798	11638		SMc02307																							SMc00590	2	1261374	1263263	R	1232803	-	SMc00590	NP_385265.1	629	COG0488	R	ABC transporter ATP-binding protein	1164
SMc02408	D	SM_b20531_m5	D	-253	-242	TTATCACGAAAT	10.5	4.4e-06	-12334	5357		SMc02323																							SMc00575	2	1244845	1246044	D	1232789	-	SMc00575	NP_385251.1	399	COG1559	D	hypothetical protein SMc00575	1149
SMc03809	D	SM_b20531_m5	D	-26	-15	TGATCACGAATG	10.5	4.4e-06	-12334	5357		SMc02340																							SMc00573	2	1242713	1242949	D	1232787	acpP	SMc00573	NP_385249.1	78	COG0236	IQ	acyl carrier protein	1147
SM_b20537	R	SM_b20537_m1	R	-41	-10	ACATTGCGCAATCAATGCAAATTTGCAAGAGC	22.8	1.3e-11	-25066	10886		SMc02366																							SMc00558	2	1228768	1229625	D	1232772	-	SMc00558	NP_385234.1	285	COG2207	K	transcriptional regulator	1132
SMc00009	D	SM_b20537_m2	D	-154	-128	GCGAAAACTTCCGCTTTGTGCAAAAAT	9.0	2.5e-06	-12899	5602		SMc02378																							SMc00479	2	1938413	1939429	R	1233458	-	SMc00479	NP_385899.1	338	COG2207	K	transcriptional regulator	1799
SM_b20537	R	SM_b20537_m2	R	-50	-24	ATGCAAATTTGCAAGAGCGAAAAGAGA	9.4	1.8e-06	-13228	5745		SMc02392																							SMc00475	2	1945275	1947938	R	1233463	alaS	SMc00475	NP_385904.1	887	COG0013	J	alanyl-tRNA synthetase	1804
SM_b20537	R	SM_b20537_m2	R	-41	-15	GCGCAATCAATGCAAATTTGCAAGAGC	15.3	2.4e-08	-17545	7620		SMc02396																							SMc00414	2	363378	363980	R	1231968	-	SMc00414	NP_384440.1	200	COG3963	I	hypothetical protein SMc00414	335
SM_b21117	R	SM_b20537_m2	R	-127	-101	ACGCAACTTTCCAATAATTGCGAGTTC	8.8	2.7e-06	-12822	5569		SMc02404																							SMc00375	2	329317	330303	D	1231929	-	SMc00375	NP_384401.1	328	COG0673	R	oxidoreductase	296
SM_b21533	D	SM_b20537_m2	D	-116	-90	TCACAAAACATCACAAATCGCAAATTA	6.7	8.9e-06	-11629	5051		SMc02408																							SMc00289	2	1859020	1859598	R	1233380	cspA5	SMc00289	NP_385824.1	192	COG1278	K	cold shock transcription regulator protein	1723
SM_b20705	D	SM_b20537_m2	D	-178	-152	TCGCAAATTGCTATCATTCGCAAAGGT	8.3	3.6e-06	-12535	5444		SMc02425																							SMc00146	2	2023390	2023881	D	1233527	-	SMc00146	NP_385968.1	163	COG1846	K	transcriptional regulator	1868
SMc00059	D	SM_b20537_m3	D	-20	-5	GTGAATTTATTGCGTG	10.2	6.3e-06	-11975	5201		SMc02429																							SMc00107	2	1067701	1068414	R	1232617	-	SMc00107	NP_385080.1	237	COG2378	K	transcriptional regulator	977
SMa0955	D	SM_b20537_m3	D	-80	-65	ACAAAAACTTTGCAAA	10.1	6.9e-06	-11884	5161		SMc02438																							SMc00098	2	1056993	1057469	R	1232604	-	SMc00098	NP_385067.1	158	COG1846	K	transcriptional regulator	964
SM_b20292	R	SM_b20537_m3	R	-181	-166	GGGCATACTTTGCAAA	10.1	7.5e-06	-11801	5125		SMc02447																							SMc00088	2	1033179	1033592	R	1232581	-	SMc00088	NP_385045.1	137			hypothetical protein SMc00088	942
SM_b20537	R	SM_b20537_m3	R	-30	-15	GCGCAATCAATGCAAA	11.6	1.4e-06	-13479	5854		SMc02463																							SMc00040	2	1057578	1058000	D	1232605	-	SMc00040	NP_385068.1	140	COG1764	V	hypothetical protein SMc00040	965
SM_b20537	R	SM_b20537_m3	R	-19	-4	GCGCAAACATTGCGCA	10.0	7.5e-06	-11801	5125		SMc02470																							SMc00036	2	1050794	1051414	D	1232599	gst1	SMc00036	NP_385062.1	206	COG0625	O	glutathione S-transferase	959
SM_b21533	D	SM_b20537_m3	D	-99	-84	TCGCAAATTATGCACC	10.1	7.5e-06	-11801	5125		SMc02479																							SMc00023	2	1018305	1019114	D	1232571	-	SMc00023	NP_385036.1	269	COG1651	O	hypothetical protein SMc00023	932
SM_b21533	D	SM_b20537_m3	D	-27	-12	CCACAAATATTGCAAC	9.8	9.0e-06	-11618	5046		SMc02483																							SMc00017	2	999940	1000920	D	1232554	thrB	SMc00017	NP_385019.1	326	COG2334	T	homoserine kinase	915
SMc03878	R	SM_b20537_m4	R	-41	-19	GTTAAGTCAAATTTGCAAAAGCA	7.2	2.7e-06	-12822	5569		SMc02484																							SM_b21600	2	1140561	1141751	R	1237371	ampC	SM_b21600	NP_437580.1	396	COG1680	V	beta-lactamase (plasmid)	5689
SM_b20537	R	SM_b20537_m4	R	-42	-20	ATCAATGCAAATTTGCAAGAGCG	15.6	1.5e-08	-18015	7824		SMc02487																							SM_b21525	2	1049322	1050797	R	1237295	-	SM_b21525	NP_437504.1	491	COG1167	KE	transcriptional regulator (plasmid)	5613
SM_b21559	R	SM_b20537_m4	R	-77	-55	ATGCTCGAATATTTGCAAAATAT	6.5	3.8e-06	-12481	5420		SMc02495																							SM_b21372	2	1036546	1037604	R	1237281	-	SM_b21372	NP_437490.1	352	COG1609	K	LacI family transcriptional regulator (plasmid)	5599
SMc01104	R	SM_b20537_m5	R	-297	-268	ATATTTCATGGAAACACTGAAATACTCCAA	8.1	9.0e-06	-11618	5046		SMc02498																							SM_b21359	2	1024474	1024932	D	1237266	-	SM_b21359	NP_437475.1	152	COG0583	K	LysR family transcriptional regulator (plasmid)	5584
SMc02438	R	SM_b20537_m5	R	-283	-254	ACACTGCTCTCATTTAAAAACCACTTGCAT	8.2	8.5e-06	-11675	5071		SMc02503																							SM_b21336	2	1002815	1003759	D	1237243	-	SM_b21336	NP_437452.1	314	COG2207	K	AraC family transcriptional regulator (plasmid)	5561
SMc03062	D	SM_b20582_m1	D	-100	-75	CGCGCGGCGCTGTAGAGGGCCGCCAA	10.1	1.4e-06	-13479	5854		SMc02504																							SM_b21210	2	963136	963807	R	1237207	-	SM_b21210	NP_437416.1	223	COG0745	TK	two-component response regulator protein (plasmid)	5525
SMc00794	R	SM_b20582_m1	R	-306	-281	GGCGCCGTGCCAGCGGGGGTCGCCCC	11.0	1.7e-07	-15587	6770		SMc02514																							SM_b21208	2	960969	961691	R	1237205	-	SM_b21208	NP_437414.2	240	COG1309	K	TetR family transcriptional regulator (plasmid)	5523
SMc00698	D	SM_b20582_m1	D	-211	-186	CGCGCGCTTGACCCCGGGGGCGCGTT	9.5	4.4e-06	-12334	5357		SMc02519																							SM_b20999	2	1235141	1236403	R	1237456	bacA	SM_b20999	NP_437665.1	420	COG1133	I	transporter (plasmid)	5774
SMc04252	R	SM_b20582_m3	R	-49	-39	TACCCCTCCCC	10.4	3.0e-06	-12717	5523		SMc02520																							SM_b20806	2	591060	591749	R	1236877	-	SM_b20806	NP_437086.1	229	COG1442	M	hypothetical protein SM_b20806 (plasmid)	5199
SMa1587	D	SM_b20582_m3	D	-302	-292	ATACCCTCCTT	9.8	8.5e-06	-11675	5071		SMc02523																							SM_b20712	2	1514330	1515259	D	1237751	mocB	SM_b20712	NP_437959.1	309	COG1879	G	rhizopine uptake ABC transporter substrate-binding protein precursor (plasmid)	6067
SMa2049	D	SM_b20582_m3	D	-248	-238	CTACCCTCCAC	9.9	8.5e-06	-11675	5071		SMc02543																							SM_b20667	2	1467800	1468804	R	1237706	-	SM_b20667	NP_437914.1	334	COG1609	K	LacI family transcriptional regulator (plasmid)	6023
SM_b20894	R	SM_b20582_m3	R	-199	-189	GCACCCTCCCG	10.3	3.8e-06	-12481	5420		SMc02560																							SM_b20509	2	531624	532391	D	1236822	-	SM_b20509	NP_437031.1	255	COG2186	K	transcriptional regulator (plasmid)	5143
SM_b20582	R	SM_b20582_m3	R	-14	-4	GCACCCTCCCT	11.1	9.9e-07	-13826	6004		SMc02562																							SM_b20392	2	405680	406387	R	1236709	-	SM_b20392	NP_436918.1	235	COG2186	K	transcriptional regulator NanR (plasmid)	5029
SMc00241	R	SM_b20582_m4	R	-142	-132	CCCCGCGCGCG	8.3	8.1e-06	-11724	5092		SMc02581																							SM_b20367	2	379530	380222	R	1236684	-	SM_b20367	NP_436893.1	230	COG1309	K	transcriptional regulator (plasmid)	5004
SMc01975	D	SM_b20582_m4	D	-126	-116	CCCCGCGCGCG	8.3	8.1e-06	-11724	5092		SMc02584																							SM_b20219	2	227578	228315	R	1236543	-	SM_b20219	NP_436752.1	245	COG0745	TK	response regulator protein (plasmid)	4862
SMc00638	R	SM_b20582_m4	R	-214	-204	CCCCGCGCGCG	8.3	8.1e-06	-11724	5092		SMc02596																							SM_b20211	2	218142	219074	R	1236535	-	SM_b20211	NP_436744.1	310	COG0583	K	transcriptional regulator (plasmid)	4854
SM_b21706	R	SM_b20582_m4	R	-384	-374	CCCCGCGCGCG	8.3	8.1e-06	-11724	5092		SMc02603																							SM_b20123	2	134261	135157	R	1236454	-	SM_b20123	NP_436663.1	298	COG0583	K	transcriptional regulator (plasmid)	4773
SMc00872	D	SM_b20582_m5	D	-180	-152	CCGCCGGAGCCGCGGGCGTGACCCCGCGG	11.1	1.7e-06	-13285	5770		SMc02634																							SM_b20056	2	66644	67711	D	1236347	-	SM_b20056	NP_436596.1	355	COG0614	P	ABC transporter substrate-binding protein (plasmid)	4705
SM_b20901	R	SM_b20582_m5	R	-52	-24	GCGCCAGACGAGGCGCTCAAAGGGCGCTG	10.0	6.8e-06	-11899	5167		SMc02636																							SM_b20055	2	63995	64984	D	1236346	-	SM_b20055	NP_436595.1	329	COG4977	K	transcriptional regulator (plasmid)	4704
SM_b21093	R	SM_b20586_m1	R	-183	-172	TAACGAACAAAT	11.0	3.1e-06	-12684	5509		SMc02647																							SM_b20048	2	59484	60191	D	1236342	-	SM_b20048	NP_436591.1	235	COG2188	K	transcriptional regulator (plasmid)	4700
SM_b21493	R	SM_b20586_m1	R	-13	-2	TATCGCACAATC	9.9	7.5e-06	-11801	5125		SMc02678																							SM_b20021	2	29540	30010	D	1236437	-	SM_b20021	NP_436564.1	156	COG1522	K	transcriptional regulator (plasmid)	4673
SMc01169	R	SM_b20586_m2	R	-134	-110	GATTTCGGTGATTATTGCACAAAAT	6.2	2.3e-06	-12983	5638		SMc02681																							SM_b20020	2	27345	29423	R	1236436	pdh	SM_b20020	NP_436563.1	692	COG0022	C	pyruvate dehydrogenase E1 component, subunits alpha and beta (plasmid)	4672
SMc01168	D	SM_b20586_m2	D	-52	-28	GATTTCGGTGATTATTGCACAAAAT	6.2	2.3e-06	-12983	5638		SMc02686																							SMa1720	2	970632	971576	D	1235981	-	SMa1720	NP_436191.1	314	COG0583	K	LysR family transcriptional regulator (plasmid)	4307
SM_b20586	R	SM_b20586_m2	R	-55	-31	TTTCTGTGCGTTATACGAACAAATA	17.2	2.5e-09	-19807	8602		SMc02695																							SMa1705	2	961799	962215	D	1235974	-	SMa1705	NP_436184.1	138	COG4957	K	MUCR family transcriptional regulatory protein IN SYRB 5\'region (plasmid)	4301
SMc00100	R	SM_b20586_m3	R	-68	-54	CGCATGTCGCACAAA	6.4	4.6e-06	-12289	5337		SMc02717																							SMa1454	2	801299	802342	D	1235829	-	SMa1454	NP_436039.2	347	COG2207	K	AraC family transcriptional regulator (plasmid)	4156
SM_b21093	R	SM_b20586_m3	R	-182	-168	GAAATAACGAACAAA	5.4	7.1e-06	-11855	5149		SMc02737																							SMa0281	2	158400	158804	D	1235376	-	SMa0281	NP_435397.1	134	COG0789	K	MerR family transcriptional regulator (plasmid)	3514
SM_b20586	R	SM_b20586_m3	R	-71	-57	CAAATACCGCACGAA	8.2	1.8e-06	-13228	5745		SMc02753																							SMa0247	2	137290	138486	D	1235356	-	SMa0247	NP_435377.1	398	COG3970	R	hypothetical protein SMa0247 (plasmid)	3494
SMc00100	R	SM_b20586_m4	R	-68	-58	TGTCGCACAAA	10.7	3.5e-06	-12563	5456		SMc02764																							SMa0190	2	104560	105189	D	1235325	-	SMa0190	NP_435346.1	209	COG1309	K	transcriptional regulator (plasmid)	3463
SM_b21093	R	SM_b20586_m4	R	-182	-172	TAACGAACAAA	11.1	2.1e-06	-13074	5678		SMc02777																							SMa0063	2	33453	34187	D	1235255	-	SMa0063	NP_435276.2	244	COG2186	K	GntR family transcriptional regulator (plasmid)	3391
SM_b21493	R	SM_b20586_m4	R	-12	-2	TATCGCACAAT	10.8	2.9e-06	-12751	5538		SMc02779																							SMc04264	1	2094373	2095263	D	1233599	-	SMc04264	NP_386040.1	296	COG2207	K	transcriptional regulator	1941
SMc01310	D	SM_b20586_m5	D	-100	-76	TGTCCCTGCGATTTTTGAAAAGAAG	1.2	8.1e-06	-11724	5092		SMc02781																							SMc04143	1	128940	129662	D	1231740	-	SMc04143	NP_384215.1	240	COG2186	K	transcriptional regulator	109
SMc01169	R	SM_b20586_m5	R	-134	-110	GATTTCGGTGATTATTGCACAAAAT	5.3	1.3e-06	-13553	5886		SMc02782																							SMc04112	1	161629	162438	D	1231771	cpaB1	SMc04112	NP_384246.1	269	COG3745	UW	pilus assembly signal peptide protein	140
SMc01168	D	SM_b20586_m5	D	-52	-28	GATTTCGGTGATTATTGCACAAAAT	5.3	1.3e-06	-13553	5886		SMc02796																							SMc04109	1	164746	166032	D	1231774	cpaE1	SMc04109	NP_384249.1	428	COG4963	UW	response regulator protein	143
SM_b20586	R	SM_b20586_m5	R	-55	-31	TTTCTGTGCGTTATACGAACAAATA	17.3	1.8e-09	-20135	8745		SMc02818																							SMc04024	1	3022233	3023450	D	1234484	-	SMc04024	NP_386914.1	405	COG2951	M	membrane-bound lytic murein transglycosylase	2817
SMc00155	R	SM_b20667_m1	R	-109	-90	CGTCGGCAGCCCTGCCGATA	1.9	8.5e-06	-11675	5071		SMc02838																							SMc04012	1	3007423	3009306	D	1234472	pepF	SMc04012	NP_386902.1	627	COG1164	E	oligoendopeptidase F protein	2805
SMc04315	D	SM_b20667_m1	D	-69	-50	ATTTGCCACCGCTGCCACAT	6.5	1.2e-06	-13633	5921		SMc02844																							SMc04011	1	3005682	3007223	R	1234471	tacA	SMc04011	NP_386901.1	513	COG2204	T	sigma-54-dependent transcription regulator protein	2804
SM_b20667	R	SM_b20667_m1	R	-105	-86	GGTTGGCAGCGCTGCCAAAG	19.0	1.0e-09	-20723	9000		SMc02846																							SMc03884	1	3550625	3551539	D	1234961	ispA	SMc03884	NP_387373.1	304	COG0142	H	geranyltranstransferase	3285
SM_b20667	R	SM_b20667_m1	R	-83	-64	TTTTGGCAGCGCTACCAATT	21.1	1.0e-10	-23026	10000		SMc02851																							SMc03881	1	3548600	3548785	R	1234958	rpmF	SMc03881	NP_387370.1	61	COG0333	J	50S ribosomal protein L32	3282
SMc00155	R	SM_b20667_m2	R	-111	-88	CGCGTCGGCAGCCCTGCCGATACC	3.0	4.3e-06	-12357	5367		SMc02866																							SMc03859	1	3524394	3524768	D	1234936	rpsP	SMc03859	NP_387348.1	124			30S ribosomal protein S16	3260
SMc04315	D	SM_b20667_m2	D	-71	-48	CAATTTGCCACCGCTGCCACATCA	5.9	1.2e-06	-13633	5921		SMc02884																							SMc03857	1	3522466	3524007	D	1234934	ffh	SMc03857	NP_387346.1	513	COG0541	U	signal recognition particle protein	3258
SM_b20667	R	SM_b20667_m2	R	-107	-84	TTGGTTGGCAGCGCTGCCAAAGCT	19.5	5.5e-10	-21321	9260		SMc02888																							SMc03809	1	3476072	3476734	D	1234886	-	SMc03809	NP_387298.1	220	COG2834	M	hypothetical protein SMc03809	3209
SM_b20667	R	SM_b20667_m2	R	-85	-62	ATTTTTGGCAGCGCTACCAATTTT	21.9	4.8e-11	-23760	10319		SMc02893																							SMc03801	1	3466366	3467358	D	1234878	-	SMc03801	NP_387290.1	330	COG3118	O	thioredoxin protein	3201
SM_b20387	R	SM_b20667_m3	R	-299	-283	GGAGCGCTTCCAATACG	10.8	1.5e-06	-13410	5824		SMc02896																							SMc03772	1	3439393	3439662	D	1234849	rpmA	SMc03772	NP_387262.1	89	COG0211	J	50S ribosomal protein L27	3173
SM_b20667	R	SM_b20667_m3	R	-107	-91	GCAGCGCTGCCAAAGCT	15.8	2.0e-08	-17728	7699		SMc02897																							SMc03178	1	3140940	3143588	D	1234586	-	SMc03178	NP_387015.1	882	COG3452	T	hypothetical protein SMc03178	2918
SM_b20667	R	SM_b20667_m3	R	-85	-69	GCAGCGCTACCAATTTT	15.2	3.8e-08	-17086	7420		SMc02910																							SMc03065	1	763243	764331	D	1232338	aglK	SMc03065	NP_384805.1	362	COG3842	E	alpha-glucoside ABC transporter ATP-binding protein	701
SMc04315	D	SM_b20667_m4	D	-71	-48	CAATTTGCCACCGCTGCCACATCA	6.4	1.4e-06	-13479	5854		SMc02911																							SMc03037	1	731285	732469	D	1232308	flaA	SMc03037	NP_384775.1	394	COG1344	N	flagellin A	671
SM_b20667	R	SM_b20667_m4	R	-107	-84	TTGGTTGGCAGCGCTGCCAAAGCT	19.6	5.4e-10	-21339	9268		SMc02941																							SMc03013	1	710149	710523	D	1232284	-	SMc03013	NP_384751.1	124			hypothetical protein SMc03013	647
SM_b20667	R	SM_b20667_m4	R	-85	-62	ATTTTTGGCAGCGCTACCAATTTT	21.9	3.2e-11	-24165	10495		SMc02942																							SMc03005	1	703799	704092	D	1232276	-	SMc03005	NP_384743.1	97			hypothetical protein SMc03005	639
SM_b20123	R	SM_b20667_m5	R	-40	-29	AGCAGCGCTGCC	10.7	3.2e-06	-12652	5495		SMc02976																							SMc02941	1	2945592	2946629	R	1234413	-	SMc02941	NP_386843.1	345	COG1729	R	hypothetical protein SMc02941	2746
SM_b20667	R	SM_b20667_m5	R	-101	-90	GGCAGCGCTGCC	14.5	3.0e-07	-15019	6523		SMc02984																							SMc02911	1	267141	267758	D	1231868	-	SMc02911	NP_384342.1	205	COG0779	J	hypothetical protein SMc02911	237
SM_b20667	R	SM_b20667_m5	R	-79	-68	GGCAGCGCTACC	14.6	5.9e-08	-16646	7229		SMc03004																							SMc02910	1	265263	266918	R	1231867	-	SMc02910	NP_384341.1	551	COG0477	GEPR	transport transmembrane protein	236
SMc00953	R	SM_b20674_m1	R	-121	-100	AGTATGCAACCGTTTGGGAAGG	9.1	6.5e-06	-11944	5187		SMc03005																							SMc02846	1	195004	195996	D	1231802	-	SMc02846	NP_384277.1	330	COG0524	G	sugar kinase	171
SMc03890	R	SM_b20674_m1	R	-181	-160	TTTATCGAAACCGTTCGGAATT	8.5	9.3e-06	-11585	5032		SMc03013																							SMc02838	1	187720	188355	D	1231793	gpmA	SMc02838	NP_384268.1	211	COG0588	G	phosphoglyceromutase	162
SMc03891	D	SM_b20674_m1	D	-115	-94	TTTATCGAAACCGTTCGGAATT	8.5	9.3e-06	-11585	5032		SMc03015																							SMc02681	1	2530119	2530961	D	1234010	lgt	SMc02681	NP_386449.1	280	COG0682	M	prolipoprotein diacylglyceryl transferase	2352
SM_b20674	D	SM_b20674_m1	D	-154	-133	CTATTCTAAACGTTTCGACACT	17.0	2.1e-09	-19981	8678		SMc03027																							SMc02636	1	1183431	1184036	R	1232731	-	SMc02636	NP_385193.1	201	COG1376	M	hypothetical protein SMc02636	1091
SM_b20674	D	SM_b20674_m1	D	-67	-46	ATCATCAAAACGTTTCGGGCGA	13.2	2.7e-07	-15125	6569		SMc03037																							SMc02519	1	3272819	3273889	D	1234700	-	SMc02519	NP_387122.1	356	COG3839	G	ABC transporter ATP-binding protein	3026
SM_b20896	D	SM_b20674_m2	D	-173	-163	AACTGTCAAAT	9.9	6.4e-06	-11959	5194		SMc03038																							SMc02514	1	3277197	3278921	D	1234705	-	SMc02514	NP_387127.1	574	COG1653	G	periplasmic binding ABC transporter protein	3031
SM_b21479	D	SM_b20674_m2	D	-282	-272	GACTGTCAAAC	10.2	4.5e-06	-12311	5347		SMc03039																							SMc02495	1	3298816	3299469	D	1234724	-	SMc02495	NP_387146.1	217	COG0176	G	translaldolase	3050
SMc04134	D	SM_b20674_m3	D	-190	-181	CTCCTCCCTT	10.6	6.7e-06	-11913	5174		SMc03046																							SMc02487	1	3308114	3309520	R	1234732	lpdA2	SMc02487	NP_387154.1	468	COG1249	C	dihydrolipoamide dehydrogenase	3058
SMc04251	R	SM_b20674_m3	R	-14	-5	TTCCTCCCTG	10.3	9.1e-06	-11607	5041		SMc03060																							SMc02483	1	3311706	3312959	R	1234736	sucB	SMc02483	NP_387158.1	417	COG0508	C	dihydrolipoamide succinyltransferase	3062
SMc04093	R	SM_b20674_m3	R	-16	-7	TTCCTCCCTG	10.3	9.1e-06	-11607	5041		SMc03061																							SMc02296	1	669078	670658	R	1232236	hsdM	SMc02296	NP_384705.1	526	COG0286	V	modification enzyme transmembrane protein	601
SM_b20817	R	SM_b20674_m3	R	-14	-5	CTCCTCCCTG	12.0	1.1e-06	-13720	5959		SMc03062																							SMc02264	1	629624	630016	D	1232205	-	SMc02264	NP_384674.1	130			hypothetical protein SMc02264	569
SM_b20674	D	SM_b20674_m3	D	-204	-195	AGCCTCCCTA	10.7	3.7e-06	-12507	5432		SMc03065																							SMc02246	1	609621	609968	R	1232187	-	SMc02246	NP_384656.1	115	COG3502	S	hypothetical protein SMc02246	551
SMc00528	D	SM_b20674_m4	D	-139	-125	GAGACGAAGCTCATG	10.9	3.8e-06	-12481	5420		SMc03104																							SMc02235	1	599523	599759	D	1232176	-	SMc02235	NP_384645.1	78	COG1522	K	transcriptional regulator	540
SM_b20674	D	SM_b20674_m4	D	-36	-22	ACGACGAAATTCAAG	12.2	1.0e-06	-13816	6000		SMc03122																							SMc02181	1	511820	515521	R	1232101	putA	SMc02181	NP_384572.1	1233	COG0506	E	bifunctional proline dehydrogenase/pyrroline-5-carboxylate dehydrogenase	467
SMc03775	D	SM_b20674_m5	D	-18	-8	TTCATGTCGAT	10.7	3.3e-06	-12622	5481		SMc03123																							SMc02166	1	527870	528913	D	1232115	pyrC	SMc02166	NP_384586.1	347	COG0418	F	dihydroorotase	481
SMc03881	R	SM_b20674_m5	R	-102	-92	TACATGTCGAA	10.6	3.7e-06	-12507	5432		SMc03124																							SMc02141	1	571559	572272	D	1232150	phoU	SMc02141	NP_384620.1	237	COG0704	P	phosphate transporter PhoU	515
SM_b20263	D	SM_b20683_m1	D	-113	-93	GTTATATACTTTTTGTATACT	10.7	1.0e-06	-13816	6000		SMc03131																							SMc02140	1	572383	573066	D	1232151	phoB	SMc02140	NP_384621.1	227	COG0745	TK	phosphate regulon transcriptional regulatory protein	516
SM_b21093	R	SM_b20683_m1	R	-129	-109	GTCATAGCTTGTTGAAATAAC	7.9	6.6e-06	-11928	5180		SMc03140																							SMc02073	1	1642521	1644278	D	1233176	argS	SMc02073	NP_385629.1	585	COG0018	J	arginyl-tRNA synthetase	1528
SM_b21464	D	SM_b20683_m1	D	-191	-171	GGTATCGCTACTGGATATAAC	13.5	1.3e-07	-15856	6886		SMc03150																							SMc02062	1	1655247	1655861	D	1233187	pcm	SMc02062	NP_385640.1	204	COG2518	O	protein-L-isoaspartate O-methyltransferase	1539
SMc02818	D	SM_b20683_m2	D	-154	-135	TAGCCCCATATACGGGAAAA	2.1	6.4e-06	-11959	5194		SMc03165																							SMc01935	1	1400248	1401474	D	1232935	-	SMc01935	NP_385393.1	408	COG4591	M	hypothetical protein SMc01935	1292
SMc02425	R	SM_b20683_m2	R	-100	-81	TTGTCTACAATATGAAAGAT	3.4	3.8e-06	-12481	5420		SMc03169																							SMc01911	1	1375842	1376240	D	1232908	-	SMc01911	NP_385369.1	132	COG1917	R	hypothetical protein SMc01911	1268
SMc04010	R	SM_b20683_m2	R	-245	-226	CCTTATAATATAGTGAACAG	7.9	5.2e-07	-14469	6284		SMc03170																							SMc01845	1	2369011	2370228	D	1233863	-	SMc01845	NP_386303.1	405	COG2951	M	transglycosylase transmembrane protein	2206
SMa1720	D	SM_b20683_m2	D	-36	-17	TCGTCCAACATGTTGTACGA	1.9	6.9e-06	-11884	5161		SMc03171																							SMc01762	1	1309800	1310135	D	1232844	-	SMc01762	NP_385306.1	111	COG0640	K	transcriptional regulator	1205
SM_b20683	R	SM_b20683_m2	R	-60	-41	TTGAACAATATATTGGACGT	13.8	2.4e-08	-17545	7620		SMc03172																							SMc01726	1	476243	477130	R	1232073	argB	SMc01726	NP_384545.1	295	COG0548	E	acetylglutamate kinase	440
SM_b20683	R	SM_b20683_m3	R	-38	-12	CTATCGATACATTGTTACTCTGGATCG	26.3	2.5e-15	-33622	14602		SMc03178																							SMc01723	1	478809	479348	R	1232076	-	SMc01723	NP_384548.1	179	COG4803	S	hypothetical protein SMc01723	443
SMc00120	R	SM_b20683_m4	R	-52	-41	AAACTAGATCGA	10.6	3.0e-06	-12717	5523		SMc03210																							SMc01700	1	1719831	1720403	D	1233237	ppiA	SMc01700	NP_385689.1	190	COG0652	O	peptidyl-prolyl cis-trans isomerase A	1588
SMc00241	R	SM_b20683_m4	R	-70	-59	ACACTAGATCGA	10.8	2.1e-06	-13074	5678		SMc03258																							SMc01630	1	2422399	2423202	R	1233908	-	SMc01630	NP_386348.1	267	COG2197	TK	transcriptional regulator	2251
SMc04163	R	SM_b20683_m4	R	-226	-215	AGACTCGATCCA	10.9	1.9e-06	-13174	5721		SMc03770																							SMc01556	1	2497426	2498214	D	1233974	-	SMc01556	NP_386413.1	262	COG2968	S	hypothetical protein SMc01556	2316
SM_b20683	R	SM_b20683_m4	R	-39	-28	ACTCTGGATCGA	10.2	4.4e-06	-12334	5357		SMc03772																							SMc01534	1	2596157	2597485	D	1234071	-	SMc01534	NP_386510.1	442	COG0161	H	omega amino acid--pyruvate transaminase	2414
SMc01169	R	SM_b20683_m5	R	-24	-14	TCTCCTATCCA	9.6	6.7e-06	-11913	5174		SMc03775																							SMc01350	1	1431144	1432694	D	1232962	gatB	SMc01350	NP_385420.1	516	COG0064	J	aspartyl/glutamyl-tRNA amidotransferase subunit B	1319
SMc01168	D	SM_b20683_m5	D	-148	-138	TCTCCTATCCA	9.6	6.7e-06	-11913	5174		SMc03801																							SMc01330	1	1453264	1454205	R	1232984	-	SMc01330	NP_385441.1	313	COG0583	K	transcriptional regulator	1340
SM_b20683	R	SM_b20683_m5	R	-18	-8	AGCCCTATCGA	9.7	5.4e-06	-12129	5268		SMc03809																							SMc01321	1	1461625	1462053	D	1232996	rplK	SMc01321	NP_385450.1	142	COG0080	J	50S ribosomal protein L11	1349
SMc02184	D	SM_b20722_m1	D	-138	-127	GCCGTTCACCAC	11.1	2.6e-06	-12860	5585		SMc03816																							SMc01318	1	1463666	1464046	D	1232999	rplL	SMc01318	NP_385453.1	126			50S ribosomal protein L7/L12	1352
SMc02340	D	SM_b20722_m1	D	-101	-90	CCCGTGCACCAG	10.0	7.3e-06	-11828	5137		SMc03820																							SMc01316	1	1468640	1472845	D	1233001	rpoC	SMc01316	NP_385455.1	1401	COG0086	K	DNA-directed RNA polymerase subunit beta\'	1354
SMc04291	D	SM_b20722_m3	D	-219	-204	GGCATTCACAATCGCT	9.7	4.5e-06	-12311	5347		SMc03829																							SMc01306	1	1480677	1481513	D	1233011	rplB	SMc01306	NP_385465.1	278	COG0090	J	50S ribosomal protein L2	1364
SMc00432	R	SM_b20722_m4	R	-48	-39	CTCTCCCCGG	11.3	1.2e-06	-13633	5921		SMc03830																							SMc01299	1	1484006	1484374	D	1233018	rplN	SMc01299	NP_385472.1	122	COG0093	J	50S ribosomal protein L14	1371
SMc02163	R	SM_b20722_m4	R	-184	-175	CTCTCCCCGC	10.6	3.5e-06	-12563	5456		SMc03832																							SMc01292	1	1487084	1487653	D	1233025	rpsE	SMc01292	NP_385479.1	189	COG0098	J	30S ribosomal protein S5	1378
SMc01975	D	SM_b20722_m4	D	-206	-197	CTCTCCCCGC	10.6	3.5e-06	-12563	5456		SMc03843																							SMc01289	1	1488589	1489929	D	1233028	secY	SMc01289	NP_385482.1	446	COG0201	U	preprotein translocase subunit SecY	1381
SMc01975	D	SM_b20722_m4	D	-130	-121	CTCTCCCCGC	10.6	3.5e-06	-12563	5456		SMc03846																							SMc01269	1	1505248	1505646	R	1233047	-	SMc01269	NP_385501.1	132	COG1396	K	transcriptional regulator	1400
SMc02523	R	SM_b20722_m4	R	-63	-54	CTCTCCCCGC	10.6	3.5e-06	-12563	5456		SMc03857																							SMc01208	1	1720429	1720938	D	1233238	ppiB	SMc01208	NP_385690.1	169	COG0652	O	peptidyl-prolyl cis-trans isomerase B protein	1589
SMc04410	D	SM_b20722_m4	D	-97	-88	CTCTCCCCGG	11.3	1.2e-06	-13633	5921		SMc03859																							SMc01139	1	411264	412808	R	1232015	rpoN	SMc01139	NP_384487.1	514	COG1508	K	RNA polymerase factor sigma-54	382
SM_b20722	R	SM_b20722_m4	R	-18	-9	CTCTCCCCGG	11.3	1.2e-06	-13633	5921		SMc03862																							SMc01127	1	423198	424088	D	1232027	-	SMc01127	NP_384499.1	296	COG3176	R	hypothetical protein SMc01127	394
SM_b21706	R	SM_b20722_m4	R	-379	-370	CTCTCCCCGC	10.6	3.5e-06	-12563	5456		SMc03873																							SMc01121	1	434538	435602	D	1232033	trpS	SMc01121	NP_384505.1	354	COG0180	J	tryptophanyl-tRNA synthetase	400
SM_b20722	R	SM_b20722_m5	R	-70	-47	GTGAACGGCAGCGCTCTCAGGCAT	21.5	1.2e-14	-32054	13921		SMc03874																							SMc01120	1	435655	436146	D	1232034	-	SMc01120	NP_384506.2	163	COG0589	T	hypothetical protein SMc01120	401
SMc03846	R	SM_b20758_m1	R	-189	-176	TTATAGATAATTTC	9.1	4.1e-06	-12405	5387		SMc03878																							SMc01025	1	1549799	1551427	D	1233093	pyrG	SMc01025	NP_385546.1	542	COG0504	F	CTP synthetase	1445
SM_b20129	D	SM_b20758_m1	D	-376	-363	TAATAGATATATAT	11.1	1.3e-06	-13553	5886		SMc03879																							SMc00990	1	943608	944804	R	1232502	fsr	SMc00990	NP_384967.1	398	COG2223	P	fosmidomycin resistance antibiotic resistance transmembrane protein	863
SM_b20758	R	SM_b20758_m1	R	-117	-104	CAATAGACATTTTG	10.6	1.7e-06	-13285	5770		SMc03881																							SMc00948	1	1774760	1776169	D	1233299	glnA	SMc00948	NP_385746.1	469	COG0174	E	glutamine synthetase	1645
SM_b20759	D	SM_b20758_m1	D	-23	-10	CAATAGACATTTTG	10.6	1.7e-06	-13285	5770		SMc03884																							SMc00929	1	898303	899283	R	1232460	-	SMc00929	NP_384925.1	326	COG0583	K	transcriptional regulator	821
SM_b20263	D	SM_b20758_m2	D	-93	-68	TAATTGTATTTTTAAATTGATTTGTG	-0.7	1.6e-06	-13346	5796		SMc03890																							SMc00860	1	927505	928521	R	1232487	ispB	SMc00860	NP_384952.1	338	COG0142	H	octaprenyl-diphosphate synthase	848
SM_b21080	D	SM_b20758_m2	D	-166	-141	ATGTTTTATATTAACTTATGTTAATG	-5.7	9.3e-06	-11585	5032		SMc03891																							SMc00813	1	833376	834788	R	1232399	-	SMc00813	NP_384864.1	470	COG2814	G	transport transmembrane protein	760
SM_b21008	R	SM_b20758_m2	R	-47	-22	TTGATGTATAGCCAATCAGATATGAA	0.4	1.0e-06	-13816	6000		SMc03893																							SMc00762	1	772228	773664	R	1232345	-	SMc00762	NP_384812.1	478	COG0174	E	glutamine synthetase	708
SM_b20758	R	SM_b20758_m2	R	-116	-91	TAGTTGTCTAGATCAATAGACATTTT	25.3	1.4e-12	-27295	11854		SMc03899																							SMc00641	1	2935226	2936821	R	1234406	serA	SMc00641	NP_386836.1	531	COG0111	HR	D-3-phosphoglycerate dehydrogenase	2739
SM_b20758	R	SM_b20758_m2	R	-108	-83	AAGATGTATAGTTGTCTAGATCAATA	15.9	1.0e-09	-20723	9000		SMc03927																							SMc00620	1	1293997	1295355	R	1232833	-	SMc00620	NP_385295.1	452	COG4222	S	signal peptide protein	1194
SM_b20759	D	SM_b20758_m2	D	-44	-19	AAGATGTATAGTTGTCTAGATCAATA	15.9	1.0e-09	-20723	9000		SMc03941																							SMc00618	1	1290115	1292325	D	1232831	ppk	SMc00618	NP_385293.1	736	COG0855	P	polyphosphate kinase	1192
SM_b20759	D	SM_b20758_m2	D	-36	-11	TAGTTGTCTAGATCAATAGACATTTT	25.3	1.4e-12	-27295	11854		SMc03961																							SMc00555	1	1225300	1225899	R	1232769	cvpA	SMc00555	NP_385231.1	199	COG1286	S	colicin V production transmembrane protein	1129
SMa1948	D	SM_b20758_m3	D	-98	-78	GCCGGCATGCTAGAGTCATGT	10.9	1.7e-06	-13285	5770		SMc03967																							SMc00548	1	1960331	1960882	D	1233473	-	SMc00548	NP_385914.1	183			signal peptide protein	1814
SM_b20758	R	SM_b20758_m3	R	-61	-41	AATGTCACAAGCCTGTCATTT	13.1	3.0e-07	-15019	6523		SMc03978																							SMc00508	1	1903904	1905211	D	1233424	purB	SMc00508	NP_385865.1	435	COG0015	F	adenylosuccinate lyase	1765
SM_b20759	D	SM_b20758_m3	D	-86	-66	AATGTCACAAGCCTGTCATTT	13.1	3.0e-07	-15019	6523		SMc03998																							SMc00505	1	1906816	1907370	D	1233427	-	SMc00505	NP_385868.1	184	COG3545	R	hypothetical protein SMc00505	1768
SMc00878	D	SM_b20758_m4	D	-72	-52	CCATGGCGTGGGTATGACAGC	8.9	2.4e-06	-12940	5620		SMc04000																							SMc00493	1	1916912	1917583	D	1233439	purQ	SMc00493	NP_385880.1	223	COG0047	F	phosphoribosylformylglycinamidine synthase I	1780
SMc02634	R	SM_b20758_m4	R	-97	-77	TCATGACAGCTCTGCGACAAT	9.4	1.9e-06	-13174	5721		SMc04010																							SMc00458	1	1104977	1105648	D	1232657	feuP	SMc00458	NP_385120.1	223	COG0745	TK	transcriptional regulator	1017
SMc03124	R	SM_b20758_m4	R	-113	-93	GGGTGAAACTTTCGTGACAGG	7.0	7.1e-06	-11855	5149		SMc04011																							SMc00433	1	380875	381777	R	1231986	iolE	SMc00433	NP_384458.1	300	COG1082	G	myo-inositol catabolism protein	353
SMc03123	D	SM_b20758_m4	D	-293	-273	GGGTGAAACTTTCGTGACAGG	7.0	7.1e-06	-11855	5149		SMc04012																							SMc00415	1	364184	365302	R	1231969	dnaN	SMc00415	NP_384441.1	372	COG0592	L	DNA polymerase III subunit beta	336
SM_b21196	D	SM_b20758_m4	D	-293	-273	TCATGAAGGTTGCATGACTGC	8.4	3.3e-06	-12622	5481		SMc04018																							SMc00410	1	360576	361556	R	1231964	-	SMc00410	NP_384436.1	326	COG0702	R	oxidoreductase	331
SMc02647	R	SM_b20758_m5	R	-24	-2	TTTGTCGAGATATATCGACATGT	5.6	2.0e-07	-15425	6699		SMc04024																							SMc00333	1	286978	288345	D	1231886	aroA	SMc00333	NP_384359.1	455	COG0128	E	3-phosphoshikimate 1-carboxyvinyltransferase	254
SM_b20263	D	SM_b20758_m5	D	-91	-69	ATTGTATTTTTAAATTGATTTGT	1.4	1.1e-06	-13720	5959		SMc04032																							SMc00328	1	282876	283391	R	1231880	fabA	SMc00328	NP_384354.1	171	COG0764	I	3-hydroxydecanoyl-ACP dehydratase	249
SM_b20455	R	SM_b20758_m5	R	-35	-13	CTTTTCTGTAGCGATTGATAAAT	-2.6	5.0e-06	-12206	5301		SMc04055																							SMc00293	1	1864871	1866193	R	1233387	thrA	SMc00293	NP_385828.1	440	COG0460	E	homoserine dehydrogenase	1727
SM_b20456	D	SM_b20758_m5	D	-96	-74	CTTTTCTGTAGCGATTGATAAAT	-2.6	5.0e-06	-12206	5301		SMc04093																							SMc00283	1	1852376	1853278	D	1233371	-	SMc00283	NP_385817.1	300	COG0583	K	transcriptional regulator	1716
SM_b21008	R	SM_b20758_m5	R	-46	-24	GATGTATAGCCAATCAGATATGA	-4.3	9.1e-06	-11607	5041		SMc04109																							SMc00275	1	1844280	1845254	D	1233363	-	SMc00275	NP_385809.1	324	COG0583	K	transcriptional regulator	1708
SM_b20896	D	SM_b20758_m5	D	-144	-122	CATATCAAAATTGATATACCACT	-2.0	4.0e-06	-12429	5398		SMc04112																							SMc00235	1	1802308	1803321	D	1233319	trpD	SMc00235	NP_385766.1	337	COG0547	E	anthranilate phosphoribosyltransferase	1665
SM_b20758	R	SM_b20758_m5	R	-115	-93	GTTGTCTAGATCAATAGACATTT	22.4	1.8e-11	-24741	10745		SMc04115																							SMc00182	1	1981371	1981856	D	1233489	-	SMc00182	NP_385930.1	161	COG0789	K	transcriptional regulator	1830
SM_b20758	R	SM_b20758_m5	R	-107	-85	GATGTATAGTTGTCTAGATCAAT	6.8	1.2e-07	-15936	6921		SMc04134																							SMc00174	1	1988630	1989769	R	1233498	-	SMc00174	NP_385939.1	379	COG0767	M	hypothetical protein SMc00174	1839
SM_b20759	D	SM_b20758_m5	D	-42	-20	GATGTATAGTTGTCTAGATCAAT	6.8	1.2e-07	-15936	6921		SMc04143																							SMc00105	1	1064165	1065205	R	1232613	-	SMc00105	NP_385076.1	346	COG1064	G	oxidoreductase transmembrane protein	973
SM_b20759	D	SM_b20758_m5	D	-34	-12	GTTGTCTAGATCAATAGACATTT	22.4	1.8e-11	-24741	10745		SMc04162																							SMc00070	1	988047	988307	R	1232541	-	SMc00070	NP_385006.1	86			signal peptide protein	902
SMc02560	R	SM_b20773_m1	R	-246	-230	TAATATACTGAATTCAT	7.5	9.2e-06	-11596	5036		SMc04163																							SMc00013	1	996489	997367	D	1232550	ctaE	SMc00013	NP_385015.2	292	COG1845	C	cytochrome C oxidase subunit III transmembrane protein	911
SMc02562	D	SM_b20773_m1	D	-116	-100	TAATATACTGAATTCAT	7.5	9.2e-06	-11596	5036		SMc04169																							SM_b21601	1	1142033	1142953	R	1237372	-	SM_b21601	NP_437581.1	306	COG4189	K	ArsR family transcriptional regulator (plasmid)	5690
SM_b20262	D	SM_b20773_m1	D	-203	-187	TGATGTTCTGCATACAT	8.1	6.5e-06	-11944	5187		SMc04175																							SM_b21569	1	1107381	1107980	R	1237340	-	SM_b21569	NP_437549.1	199	COG1917	R	transcriptional regulator (plasmid)	5658
SM_b20773	D	SM_b20773_m1	D	-134	-118	TTGTATTCTGTATGCAG	14.5	6.6e-08	-16534	7180		SMc04198																							SM_b21523	1	1446368	1447183	R	1237685	minD	SM_b21523	NP_437893.1	271	COG2894	D	cell division inhibitor protein (plasmid)	6002
SMc02888	R	SM_b20773_m2	R	-68	-57	CTGAATGCAATA	9.7	8.0e-06	-11736	5097		SMc04203																							SM_b21514	1	1438191	1439018	D	1237676	hemK2	SM_b21514	NP_437884.1	275	COG2890	J	modification methylase (plasmid)	5993
SMc02503	D	SM_b20773_m2	D	-13	-2	GGGGATACAAAA	10.1	5.8e-06	-12058	5237		SMc04220																							SM_b21484	1	1405318	1405839	D	1237643	rpoE5	SM_b21484	NP_437851.1	173	COG1595	K	RNA polymerase sigma-E factor (sigma-24) protein (plasmid)	5960
SMc02378	D	SM_b20773_m3	D	-271	-257	TGAATTTAAAAAAGG	9.6	5.8e-06	-12058	5237		SMc04226																							SM_b21419	1	1349044	1349931	R	1237578	-	SM_b21419	NP_437786.1	295	COG0662	G	AraC family transcriptional regulator (plasmid)	5895
SMc00150	R	SM_b20773_m4	R	-12	-2	TAGATACAAAC	10.5	3.6e-06	-12535	5444		SMc04230																							SM_b21270	1	844532	844996	D	1237105	-	SM_b21270	NP_437314.1	154	COG0664	T	transcriptional regulator (plasmid)	5426
SMc02503	D	SM_b20773_m4	D	-12	-2	GGGATACAAAA	10.6	3.0e-06	-12717	5523		SMc04251																							SM_b21197	1	946668	947591	D	1237193	oppB	SM_b21197	NP_437402.1	307	COG0601	EP	oligopeptide uptake ABC transporter permease (plasmid)	5511
SMc04000	D	SM_b20773_m5	D	-192	-175	TGCATCCGGCACGCAAAT	8.9	9.1e-06	-11607	5041		SMc04252																							SM_b21183	1	930553	932442	R	1237180	htpG	SM_b21183	NP_437389.1	629	COG0326	O	molecular chaperone HtpG (plasmid)	5500
SMa0097	R	SM_b20773_m5	R	-55	-38	ATCATAAGTCATTCAATC	10.6	2.7e-06	-12822	5569		SMc04260																							SM_b21158	1	901638	902501	D	1237155	-	SM_b21158	NP_437364.1	287	COG1737	K	transcriptional regulator (plasmid)	5475
SMa0101	D	SM_b20773_m5	D	-149	-132	ATCATAAGTCATTCAATC	10.6	2.7e-06	-12822	5569		SMc04264																							SM_b21035	1	653580	653798	R	1236938	-	SM_b21035	NP_437147.1	72	COG1476	K	hypothetical protein SM_b21035 (plasmid)	5260
SM_b20262	D	SM_b20773_m5	D	-191	-174	TACATAGAGTATACAAAC	12.5	5.1e-07	-14489	6292		SMc04277																							SM_b20875	1	1281348	1282277	R	1237500	-	SM_b20875	NP_437709.1	309	COG0726	GM	hypothetical protein SM_b20875 (plasmid)	5818
SM_b20773	D	SM_b20773_m5	D	-168	-151	CTCATACGTCATTCAAAA	16.7	2.7e-09	-19730	8569		SMc04286																							SM_b20873	1	1280236	1280748	R	1237498	allA	SM_b20873	NP_437707.1	170	COG3194	F	ureidoglycolate hydrolase (plasmid)	5816
SMc00163	D	SM_b20817_m1	D	-34	-21	AGAATCCATCAAAA	10.5	4.5e-06	-12311	5347		SMc04291																							SM_b20755	1	1545196	1546728	D	1237779	pccB	SM_b20755	NP_437987.1	510	COG4799	I	propionyl-CoA carboxylase subunit beta (plasmid)	6095
SM_b20817	R	SM_b20817_m1	R	-74	-61	AGAATATATCATGA	11.9	1.0e-06	-13816	6000		SMc04296																							SM_b20722	1	1527168	1527845	R	1237761	-	SM_b20722	NP_437969.1	225	COG0745	TK	two-component response regulator protein (plasmid)	6077
SMc02910	R	SM_b20817_m2	R	-167	-147	TCTTGATCGGTTAGATGAAGA	11.1	9.6e-07	-13856	6018		SMc04305																							SM_b20582	1	1596355	1597275	R	1237826	-	SM_b20582	NP_438034.1	306	COG0583	K	LysR family transcriptional regulator (plasmid)	6142
SMc02911	D	SM_b20817_m2	D	-80	-60	TCTTGATCGGTTAGATGAAGA	11.1	9.6e-07	-13856	6018		SMc04315																							SM_b20516	1	541280	541606	D	1236828	-	SM_b20516	NP_437037.1	108			response regulator protein (plasmid)	5150
SM_b20817	R	SM_b20817_m2	R	-74	-54	AATTGAGAGAATATATCATGA	16.3	1.1e-08	-18325	7959		SMc04323																							SM_b20494	1	511441	512337	D	1236807	-	SM_b20494	NP_437016.1	298	COG0583	K	transcriptional regulator (plasmid)	5128
SM_b20817	R	SM_b20817_m3	R	-73	-59	AGAGAATATATCATG	16.5	1.2e-08	-18238	7921		SMc04331																							SM_b20215	1	222993	223973	D	1236539	-	SM_b20215	NP_436748.1	326	COG4977	K	transcriptional regulator (plasmid)	4858
SMc04134	D	SM_b20817_m4	D	-192	-181	TCCTCCTCCCTT	10.8	3.6e-06	-12535	5444		SMc04348																							SMa2004	1	1136007	1137080	D	1236134	-	SMa2004	NP_436344.1	357	COG1846	K	ROK family transcriptional regulator (plasmid)	4456
SMc00159	D	SM_b20817_m4	D	-255	-244	CCCGCCTCCCTC	11.1	2.3e-06	-12983	5638		SMc04383																							SMa1927	1	1096027	1097019	D	1236094	-	SMa1927	NP_436304.1	330	COG3181	C	hypothetical protein SMa1927 (plasmid)	4417
SM_b20817	R	SM_b20817_m4	R	-14	-3	GTCTCCTCCCTG	10.3	6.1e-06	-12007	5215		SMc04405																							SMa1207	1	661869	662549	R	1235693	-	SMa1207	NP_435903.2	226	COG0664	T	Crp family transcriptional regulator (plasmid)	4020
SMc00829	R	SM_b20817_m5	R	-53	-33	AATCTAACAGGGCCTATCAAG	10.6	2.8e-06	-12786	5553		SMc04410																							SMa0849	1	466418	467398	D	1235498	syrM	SMa0849	NP_435708.1	326	COG0583	K	SyrM transcriptional regulator (plasmid)	3825
SMc00830	D	SM_b20817_m5	D	-150	-130	AATCTAACAGGGCCTATCAAG	10.6	2.8e-06	-12786	5553		SMc04411																							SMa0402	1	217871	218602	D	1235439	-	SMa0402	NP_435460.1	243	COG2188	K	GntR family transcriptional regulator (plasmid)	3577
SMc02495	D	SM_b20859_m1	D	-81	-71	CAACGCGCGCG	10.2	6.1e-06	-12007	5215		SMc04449																							SMa0246	1	136409	137119	D	1235355	-	SMa0246	NP_435376.2	236	COG2186	K	GntR family transcriptional regulator (plasmid)	3493
SM_b20859	D	SM_b20859_m1	D	-162	-152	CAACGCGCGAA	10.2	6.1e-06	-12007	5215		SMc04882																							SMa0114	1	62292	62654	D	1235283	-	SMa0114	NP_435304.1	120	COG0784	T	two-component response regulator (plasmid)	3420
SM_b20859	D	SM_b20859_m1	D	-18	-8	CAACGAGCGCG	10.1	8.1e-06	-11724	5092
SMc01651	D	SM_b20859_m2	D	-97	-71	ACAGCGTCGCGCTGGCGTGCACGACGA	10.0	5.9e-06	-12041	5229
SM_b20859	D	SM_b20859_m2	D	-146	-120	AAAGCACCGCGACATTGCTCGCGACAT	17.6	1.8e-10	-22438	9745
SMc02584	R	SM_b20859_m3	R	-46	-29	TCTCACCGGACGCGCAAA	10.3	4.0e-06	-12429	5398
SMc02495	D	SM_b20859_m3	D	-84	-67	TTTCAACGCGCGCGATAT	9.9	5.6e-06	-12093	5252
SM_b20859	D	SM_b20859_m3	D	-167	-150	CGTCACAACGCGCGAAAA	16.6	1.2e-09	-20541	8921
SM_b20859	D	SM_b20859_m3	D	-21	-4	AGTCAACGAGCGCGCAAT	16.0	4.2e-09	-19288	8377
SMc03062	D	SM_b20859_m4	D	-175	-165	TAATCCTATCC	11.5	1.9e-06	-13174	5721
SM_b20817	R	SM_b20859_m4	R	-107	-97	TCAACCTATCC	11.7	1.4e-06	-13479	5854
SM_b20859	D	SM_b20859_m4	D	-383	-373	TAATCCTATCC	11.5	1.9e-06	-13174	5721
SM_b20859	D	SM_b20859_m4	D	-223	-213	GCAACCTATCC	12.2	9.1e-07	-13910	6041
SM_b20859	D	SM_b20859_m5	D	-118	-90	GGGGATCTCATGGGTAGCAGGACTGACAG	26.4	8.4e-16	-34713	15076
SM_b20896	D	SM_b20896_m1	D	-146	-134	TGCATATCAAAAT	9.8	7.6e-06	-11787	5119
SM_b20896	D	SM_b20896_m1	D	-132	-120	GATATACCACTCT	12.8	3.8e-07	-14783	6420
SM_b20749	D	SM_b20896_m1	D	-213	-201	GATATACCAGCTT	9.6	9.0e-06	-11618	5046
SMc00654	D	SM_b20896_m2	D	-146	-123	AATATTTAACATTTTCGATACACC	6.5	2.1e-06	-13074	5678
SMa2215	D	SM_b20896_m2	D	-218	-195	TTTCTATATCTATTGCGATTTAAA	3.3	9.5e-06	-11564	5022
SM_b20896	D	SM_b20896_m2	D	-148	-125	CATGCATATCAAAATTGATATACC	21.5	5.8e-11	-23571	10237
SMc03065	D	SM_b20896_m3	D	-16	-6	GAGGGGAGGGT	9.9	6.1e-06	-12007	5215
SM_b20263	D	SM_b20896_m3	D	-19	-9	CAAGGGAGAGA	10.1	3.7e-06	-12507	5432
SMc00256	R	SM_b20896_m4	R	-37	-7	TCAAATTTTATGCGTGATATGTCAAATCTCA	6.3	3.4e-06	-12592	5469
SMc01569	D	SM_b20896_m4	D	-208	-178	TTGAATTATAAGGCATTTTATTTCCATACAA	4.6	8.4e-06	-11687	5076
SM_b20072	R	SM_b20896_m4	R	-71	-41	ACAAATGGAATACAAGTTCTAAGGAAAATCA	12.6	9.2e-08	-16201	7036
SM_b20896	D	SM_b20896_m4	D	-189	-159	TGGAATCAATTGCCATAACTGTCAAATACAA	13.8	4.1e-08	-17010	7387
SM_b20896	D	SM_b20896_m4	D	-184	-154	TCAATTGCCATAACTGTCAAATACAATATCG	6.5	3.1e-06	-12684	5509
SM_b20896	D	SM_b20896_m4	D	-168	-138	TCAAATACAATATCGCTTTGCATGCATATCA	21.9	3.4e-11	-24105	10469
SM_b20896	D	SM_b20896_m5	D	-145	-125	GCATATCAAAATTGATATACC	20.1	1.4e-10	-22689	9854
SMc02147	D	SM_b20901_m1	D	-212	-201	CTTCCTCCCGCT	10.3	4.6e-06	-12289	5337
SMc01285	D	SM_b20901_m1	D	-69	-58	TGTCCTCCCGGT	10.5	3.7e-06	-12507	5432
SMc02340	D	SM_b20901_m1	D	-336	-325	TATCCTCCCTCT	10.2	5.8e-06	-12058	5237
SM_b21346	D	SM_b20901_m1	D	-218	-207	TCTCCTCCCGGT	10.3	4.6e-06	-12289	5337
SM_b21598	D	SM_b20901_m1	D	-235	-224	TCTCCTCCCACA	10.4	3.7e-06	-12507	5432
SM_b21706	R	SM_b20901_m1	R	-239	-228	CCTCCTCCCGAG	10.2	5.8e-06	-12058	5237
SMc03038	D	SM_b20901_m2	D	-189	-175	GGGTTGAAAAATTTA	8.9	7.0e-06	-11870	5155
SMc01052	R	SM_b20901_m2	R	-127	-113	CTGTCGAGCAAAACA	9.1	6.2e-06	-11991	5208
SM_b20901	R	SM_b20901_m2	R	-297	-283	CTGTCGAGAAAAAAC	14.6	6.9e-08	-16489	7161
SMc01845	D	SM_b20901_m3	D	-64	-51	CATTCTCGACAGAC	10.3	6.3e-06	-11975	5201
SM_b20129	D	SM_b20901_m3	D	-34	-21	GATTGTTGACAATC	10.0	9.0e-06	-11618	5046
SM_b20901	R	SM_b20901_m3	R	-294	-281	GACTGTCGAGAAAA	10.5	4.8e-06	-12247	5319
SMc00058	D	SM_b20901_m4	D	-358	-334	CAATTTTAGCAACTCGGAATAAAGT	8.4	4.5e-06	-12311	5347
SMc04291	D	SM_b20901_m4	D	-163	-139	TTTTTTTCTTGCTGCAGGAGAGAAT	7.9	5.7e-06	-12075	5244
SMc04291	D	SM_b20901_m4	D	-161	-137	TTTTTCTTGCTGCAGGAGAGAATAC	10.8	9.4e-07	-13877	6027
SMc01495	R	SM_b20901_m4	R	-153	-129	AAATTTTACCGTTTGATAAAAAAAT	7.7	6.5e-06	-11944	5187
SMc03846	R	SM_b20901_m4	R	-250	-226	ACTTTTTTTGCTCTGCGAAAAGATA	7.5	7.3e-06	-11828	5137
SM_b21080	D	SM_b20901_m4	D	-192	-168	TATTTTTCTCCTCTATAAACCAAAT	8.3	4.5e-06	-12311	5347
SM_b21102	R	SM_b20901_m4	R	-108	-84	TAAATTTATCGTTTGTATATAAATC	9.4	2.2e-06	-13027	5658
SM_b20901	R	SM_b20901_m4	R	-297	-273	ATTTTCTCGACTGTCGAGAAAAAAC	13.9	8.2e-08	-16317	7086
SM_b20901	R	SM_b20901_m4	R	-295	-271	TTATTTTCTCGACTGTCGAGAAAAA	25.0	8.0e-15	-32459	14097
SMc01327	R	SM_b20901_m5	R	-77	-65	CGGCTGTGGAGAA	7.8	8.9e-06	-11629	5051
SMc00508	D	SM_b20901_m5	D	-28	-16	CCACTCTCGACGA	7.8	8.9e-06	-11629	5051
SM_b20901	R	SM_b20901_m5	R	-292	-280	CGACTGTCGAGAA	15.0	3.2e-08	-17258	7495
SM_b20935	R	SM_b20935_m1	R	-26	-7	GTCTCCTTCTCTTGGCATGA	19.5	3.9e-12	-26270	11409
SMc02844	R	SM_b20935_m2	R	-36	-23	TGAAGGATACATGC	9.6	8.9e-06	-11629	5051
SMc02470	D	SM_b20935_m3	D	-102	-80	GACAGGGGACGCTAATTGCCCGT	11.5	1.4e-06	-13479	5854
SM_b20935	R	SM_b20935_m3	R	-83	-61	GACACGCGTCACTGCATGCCCCC	17.2	1.6e-10	-22556	9796
SMa1893	D	SM_b20935_m4	D	-80	-62	CAACCGGTGTCCGGCAGCT	11.1	2.2e-06	-13027	5658
SMc01208	D	SM_b20935_m5	D	-19	-8	ACAGAAGGAGAA	10.7	3.1e-06	-12684	5509
SMc01885	D	SM_b20935_m5	D	-252	-241	AGAGAAAGATAC	9.8	6.5e-06	-11944	5187
SM_b20258	D	SM_b20935_m5	D	-17	-6	CAAGAAGGAGAC	10.5	3.7e-06	-12507	5432
SMc04134	D	SM_b21008_m1	D	-147	-124	ACAAATAACTATTTGGTTACAAGT	7.7	5.4e-06	-12129	5268
SMc01819	R	SM_b21008_m1	R	-36	-13	GTCCATACCCCCAGGCATATGACG	6.8	9.3e-06	-11585	5032
SM_b21008	R	SM_b21008_m1	R	-145	-122	CCATATATTTCCATGGATATGGGT	10.3	1.1e-06	-13720	5959
SM_b21008	R	SM_b21008_m1	R	-48	-25	ATGTATAGCCAATCAGATATGAAT	18.1	1.6e-09	-20253	8796
SMc04134	D	SM_b21008_m2	D	-147	-124	ACAAATAACTATTTGGTTACAAGT	10.0	6.8e-07	-14201	6167
SM_b20069	D	SM_b21008_m2	D	-390	-367	ACTGACGGCTGAATGGCTATGTAT	6.6	4.5e-06	-12311	5347
SM_b21008	R	SM_b21008_m2	R	-145	-122	CCATATATTTCCATGGATATGGGT	7.1	3.3e-06	-12622	5481
SM_b21008	R	SM_b21008_m2	R	-48	-25	ATGTATAGCCAATCAGATATGAAT	19.1	6.8e-10	-21109	9167
SMc00410	R	SM_b21008_m3	R	-54	-42	TACATAGCCCAAG	10.3	5.7e-06	-12075	5244
SMc01428	R	SM_b21008_m3	R	-27	-15	TCAATAGCCATGG	10.3	5.7e-06	-12075	5244
SMc02695	D	SM_b21008_m3	D	-45	-33	CCCATAGCCACGG	9.8	9.4e-06	-11575	5027
SMc04055	R	SM_b21008_m3	R	-51	-39	TCTATATCCAAAG	10.1	7.7e-06	-11774	5114
SM_b21008	R	SM_b21008_m3	R	-38	-26	TGTATAGCCAATC	12.3	3.5e-07	-14865	6456
SMc04134	D	SM_b21008_m4	D	-147	-124	ACAAATAACTATTTGGTTACAAGT	9.0	1.4e-06	-13479	5854
SM_b20069	D	SM_b21008_m4	D	-390	-367	ACTGACGGCTGAATGGCTATGTAT	5.5	8.9e-06	-11629	5051
SM_b21008	R	SM_b21008_m4	R	-145	-122	CCATATATTTCCATGGATATGGGT	11.7	2.8e-07	-15088	6553
SM_b21008	R	SM_b21008_m4	R	-48	-25	ATGTATAGCCAATCAGATATGAAT	17.2	4.4e-09	-19242	8357
SM_b21008	R	SM_b21008_m5	R	-58	-40	GATATGAATGAGTCAAGAG	17.8	2.0e-09	-20030	8699
SMc02147	D	SM_b21021_m1	D	-150	-136	TCGTGAAAATCATGT	7.4	6.1e-06	-12007	5215
SMa1987	D	SM_b21021_m1	D	-61	-47	ACAAGAAATTTATGA	7.3	6.8e-06	-11899	5167
SM_b20069	D	SM_b21021_m1	D	-299	-285	TCATCAATTTCATAA	7.0	9.4e-06	-11575	5027
SM_b21021	D	SM_b21021_m1	D	-220	-206	TCATGAAATTCATGT	16.8	1.7e-08	-17890	7770
SMc00820	R	SM_b21021_m2	R	-48	-29	ATGAATATCATTAAAAACAT	8.6	3.4e-07	-14894	6469
SMc00821	D	SM_b21021_m2	D	-186	-167	ATGAATATCATTAAAAACAT	8.6	3.4e-07	-14894	6469
SMc00593	R	SM_b21021_m2	R	-77	-58	ATGCCACTCATGAAATTTAA	3.8	3.6e-06	-12535	5444
SMc00594	D	SM_b21021_m2	D	-82	-63	ATGCCACTCATGAAATTTAA	3.8	3.6e-06	-12535	5444
SM_b21021	D	SM_b21021_m2	D	-227	-208	ATGTAATTCATGAAATTCAT	23.6	8.7e-12	-25468	11060
SM_b21021	D	SM_b21021_m3	D	-168	-147	GTGATAAACGACTATAGGAAGC	16.5	1.0e-08	-18421	8000
SM_b21021	D	SM_b21021_m3	D	-105	-84	CGGATTGGAACTGGGAAGAATA	12.4	3.7e-07	-14810	6432
SMc02781	R	SM_b21021_m4	R	-112	-99	CAATCATGTGATTG	10.2	6.1e-06	-12007	5215
SMc02404	D	SM_b21021_m4	D	-94	-81	ACGTCACATGATTA	12.7	4.1e-07	-14707	6387
SMa1442	R	SM_b21021_m4	R	-31	-18	TCATCATATGACTA	12.4	6.3e-07	-14278	6201
SMa2049	D	SM_b21021_m4	D	-79	-66	ATGTCACGTGACCA	11.3	2.2e-06	-13027	5658
SM_b20556	D	SM_b21021_m4	D	-258	-245	AGATCATGTGATGG	11.3	2.2e-06	-13027	5658
SM_b21021	D	SM_b21021_m4	D	-175	-162	CCGTCACGTGATAA	11.4	2.0e-06	-13122	5699
SMc01974	D	SM_b21021_m5	D	-111	-102	TGTGATCACA	12.2	5.1e-07	-14489	6292
SMc04882	R	SM_b21021_m5	R	-69	-60	TATGATCAGA	11.0	5.0e-06	-12206	5301
SMc04383	D	SM_b21021_m5	D	-58	-49	TATGATCAGA	11.0	5.0e-06	-12206	5301
SM_b21021	D	SM_b21021_m5	D	-208	-199	TGTGATCATA	11.8	1.5e-06	-13410	5824
SMc03169	D	SM_b21079_m4	D	-241	-224	CCACCAATTGGATTGAGA	7.7	8.2e-06	-11711	5086
SMc03131	R	SM_b21079_m4	R	-153	-136	CAACTGAATTAGTAAATC	7.7	8.2e-06	-11711	5086
SMc03039	D	SM_b21080_m1	D	-159	-138	GCGTTTAACCTTTGTTAACCAT	4.8	7.8e-07	-14064	6108
SMc01769	D	SM_b21080_m1	D	-164	-143	GGGGTTTACCTTTGTTAACCAT	-0.7	7.9e-06	-11749	5102
SMc02094	D	SM_b21080_m1	D	-121	-100	GAAGTAAACAGAAATTAACGAG	-0.1	6.2e-06	-11991	5208
SMc01209	D	SM_b21080_m1	D	-181	-160	CCCGTTAACTTGGGTTCACGTT	3.0	1.8e-06	-13228	5745
SM_b21080	D	SM_b21080_m1	D	-160	-139	TATATTAACTTATGTTAATGAA	12.2	2.0e-08	-17728	7699
SMc04134	D	SM_b21080_m2	D	-147	-127	ACAAATAACTATTTGGTTACA	12.9	3.9e-07	-14757	6409
SMc00159	D	SM_b21080_m2	D	-89	-69	AAAAAGTATAAGAAAATTAAC	11.8	1.2e-06	-13633	5921
SM_b20946	R	SM_b21080_m2	R	-165	-145	CGAAAGTCGCGAAATATTACG	9.8	5.7e-06	-12075	5244
SMc01495	R	SM_b21080_m4	R	-156	-142	TGATAAAAAAATAAA	10.0	6.9e-06	-11884	5161
SM_b20129	D	SM_b21080_m4	D	-376	-362	TAATAGATATATATT	10.8	2.8e-06	-12786	5553
SMc02163	R	SM_b21093_m1	R	-76	-65	AGCTAGTCGGTT	11.2	1.4e-06	-13479	5854
SM_b21093	R	SM_b21093_m1	R	-106	-95	GGCTAGTCGTTT	16.4	2.5e-08	-17504	7602
SM_b20129	D	SM_b21093_m3	D	-184	-169	GTGATTTCATTTCAGC	9.6	8.7e-06	-11652	5060
SM_b20448	D	SM_b21093_m3	D	-63	-48	GGGAAATTATTTCGTC	10.8	3.0e-06	-12717	5523
SM_b21093	R	SM_b21093_m3	R	-135	-120	TTGAAATAACTTCGCT	12.5	4.9e-07	-14529	6310
SMc01875	R	SM_b21093_m4	R	-369	-357	CTGAAAGTACTAC	10.1	3.4e-06	-12592	5469
SMa0303	D	SM_b21093_m4	D	-47	-35	TAGAAATAACGTC	9.2	7.0e-06	-11870	5155
SM_b21093	R	SM_b21093_m4	R	-178	-166	CCGAAATAACGAA	11.9	1.3e-06	-13553	5886
SM_b21093	R	SM_b21093_m4	R	-132	-120	TTGAAATAACTTC	12.8	6.3e-07	-14278	6201
SM_b21093	R	SM_b21093_m5	R	-117	-95	GGCTAGTCGTTTTTGTCATAGCT	22.6	2.6e-11	-24373	10585
SMa2215	D	SM_b21102_m1	D	-114	-101	TTCACATATGCACG	8.5	5.1e-06	-12186	5292
SM_b21102	R	SM_b21102_m1	R	-44	-31	TCCATATACGCATG	12.0	6.3e-07	-14278	6201
SMc00762	R	SM_b21102_m2	R	-105	-96	AAGGAGGATA	10.6	4.1e-06	-12405	5387
SM_b20154	R	SM_b21102_m3	R	-251	-226	TGTGCATTTTTCTGTTGACAAACGGA	-1.1	5.2e-06	-12167	5284
SM_b21102	R	SM_b21102_m3	R	-42	-17	GATGAATATTCCTCTCCATATACGCA	28.8	3.5e-14	-30983	13456
SM_b20946	R	SM_b21102_m3	R	-283	-258	ATTATAAAGTATTGTTAATAGACGCA	-2.4	8.7e-06	-11652	5060
SM_b21102	R	SM_b21102_m5	R	-42	-16	AGATGAATATTCCTCTCCATATACGCA	29.1	2.7e-14	-31243	13569
SMc01592	D	SM_b21115_m1	D	-122	-109	TATGCGTAAATTTG	9.7	8.6e-06	-11664	5066
SMc02520	D	SM_b21115_m1	D	-46	-33	ATTGCACAAATTGT	10.3	5.5e-06	-12111	5260
SMa2215	D	SM_b21115_m1	D	-139	-126	AATGCCTAAAATAT	11.6	1.7e-06	-13285	5770
SM_b21115	R	SM_b21115_m1	R	-186	-173	AATGCCTAAATAAT	13.3	1.6e-07	-15648	6796
SM_b21115	R	SM_b21115_m1	R	-158	-145	TATGCCTAAATATT	14.7	9.2e-09	-18504	8036
SMc02560	R	SM_b21115_m2	R	-72	-43	TCGAGATGCGTTGCAAGAATCGCGGCAACC	9.2	1.5e-06	-13410	5824
SMc02562	D	SM_b21115_m2	D	-303	-274	TCGAGATGCGTTGCAAGAATCGCGGCAACC	9.2	1.5e-06	-13410	5824
SMc02118	R	SM_b21115_m2	R	-194	-165	ACGTGAAGCTCGCCAGAAGTTTAGGCAGGT	6.4	8.0e-06	-11736	5097
SMc02117	D	SM_b21115_m2	D	-177	-148	ACGTGAAGCTCGCCAGAAGTTTAGGCAGGT	6.4	8.0e-06	-11736	5097
SM_b21115	R	SM_b21115_m2	R	-140	-111	TCATGATGCGATGCAGCAATTTCCGCAATA	24.9	2.0e-13	-29240	12699
SMc02323	D	SM_b21115_m3	D	-94	-75	GTTCATGATGCGCCGCACAA	9.8	4.8e-06	-12247	5319
SM_b21115	R	SM_b21115_m3	R	-128	-109	TATCATGATGCGATGCAGCA	17.7	6.9e-10	-21094	9161
SMc02240	R	SM_b21115_m4	R	-49	-36	GCTGCAGCGCACAA	9.7	9.7e-06	-11543	5013
SMc00300	D	SM_b21115_m4	D	-45	-32	GCCGCATCGCACAA	11.4	1.6e-06	-13346	5796
SMc01834	R	SM_b21115_m4	R	-104	-91	GCTGCAGTGCAGCA	11.9	7.6e-07	-14090	6119
SMc00720	R	SM_b21115_m4	R	-212	-199	GACGCACAGCAGAA	10.8	3.2e-06	-12652	5495
SMc03816	D	SM_b21115_m4	D	-84	-71	GCTGCATTGCATCA	11.9	7.6e-07	-14090	6119
SMc03879	R	SM_b21115_m4	R	-145	-132	GCCGCATTGCACAA	11.7	1.0e-06	-13816	6000
SMa0319	D	SM_b21115_m4	D	-116	-103	GCTGCATTGCATCA	11.9	7.6e-07	-14090	6119
SMc02408	D	SM_b21115_m5	D	-381	-361	TCTGCAAATAATGTGGTCATG	9.1	7.5e-06	-11801	5125
SMc04032	R	SM_b21115_m5	R	-86	-66	TTCGGATAAAATTTAGCCGTG	9.4	6.0e-06	-12024	5222
SMa2215	D	SM_b21115_m5	D	-108	-88	TATGCACGAATATTAGGCATA	15.0	3.3e-08	-17227	7481
SM_b21035	R	SM_b21115_m5	R	-63	-43	TTCGGACATTTTGTAGGAAAA	9.4	6.0e-06	-12024	5222
SMc02560	R	SM_b21117_m2	R	-195	-185	TGCGATTCAAC	9.2	8.4e-06	-11687	5076
SMc02562	D	SM_b21117_m2	D	-161	-151	TGCGATTCAAC	9.2	8.4e-06	-11687	5076
SM_b20004	R	SM_b21117_m2	R	-108	-98	ATCGATTCAAC	9.4	5.5e-06	-12111	5260
SMc00888	D	SM_b21117_m3	D	-324	-309	ACACTTCTCCATAGCT	10.2	4.3e-06	-12357	5367
SMc02560	R	SM_b21117_m4	R	-238	-210	ATATTTTTCTTTAAATCGATTAATATACT	8.7	4.1e-06	-12405	5387
SMc02562	D	SM_b21117_m4	D	-136	-108	ATATTTTTCTTTAAATCGATTAATATACT	8.7	4.1e-06	-12405	5387
SMc02274	D	SM_b21117_m4	D	-253	-225	GCTGTATTAGTGAGCTTTTAACTCATAGT	9.4	2.5e-06	-12899	5602
SMc04169	D	SM_b21117_m4	D	-321	-293	TCAGTTTGCCTCATTTTTGCTCGATTACG	9.1	3.1e-06	-12684	5509
SM_b21117	R	SM_b21117_m4	R	-46	-18	CGAGTTCGAGTCAGCTTATGGCATATAAG	24.3	1.1e-13	-29838	12959
SM_b20531	D	SM_b21117_m5	D	-90	-62	TCTGCTCCCACGGCCCACCTGCGGCAAAA	9.6	5.0e-06	-12206	5301
SM_b21117	R	SM_b21117_m5	R	-75	-47	TTTGCTTGAATGGACGCCGCGATGCAATC	20.4	3.4e-12	-26407	11469
SMc03004	D	SM_b21158_m1	D	-211	-194	AGGAAGTCTCGACTTCTC	10.6	3.3e-06	-12622	5481
SMc01615	R	SM_b21158_m1	R	-57	-40	GGGAAAGGTAACATTCTT	11.1	1.4e-06	-13479	5854
SMa0557	R	SM_b21158_m1	R	-75	-58	GTGAAGTCTATATTTCCC	12.2	1.0e-07	-16118	7000
SM_b20072	R	SM_b21158_m1	R	-92	-75	ATGAAATGTACATTTCAT	12.3	7.4e-08	-16419	7131
SMc02170	D	SM_b21158_m2	D	-258	-248	GGAAGGGCGGC	10.1	8.7e-06	-11652	5060
SMc00581	R	SM_b21158_m2	R	-182	-172	GTAAGGGCGGG	10.1	8.7e-06	-11652	5060
SM_b21158	D	SM_b21158_m2	D	-18	-8	GGAAGGGCGCC	11.8	8.7e-07	-13955	6060
SMc02073	D	SM_b21158_m3	D	-85	-72	GGAGGCTGCAGGTT	10.5	4.3e-06	-12357	5367
SM_b20069	D	SM_b21169_m1	D	-274	-265	TCGAACTATG	10.4	7.4e-06	-11814	5131
SM_b21169	D	SM_b21169_m1	D	-10	-1	TTGAACTATT	11.4	2.3e-06	-12983	5638
SM_b21222	D	SM_b21169_m2	D	-42	-25	TTCTTGTTCAATAGTCCA	12.5	4.7e-07	-14571	6328
SM_b21169	D	SM_b21169_m2	D	-27	-10	CGCTTGTTCAAAAAATAT	12.8	3.6e-07	-14837	6444
SMc00058	D	SM_b21169_m3	D	-262	-241	TTGTGGAAAATACTTTGAACTG	8.7	6.1e-06	-12007	5215
SM_b21169	D	SM_b21169_m3	D	-24	-3	TTGTTCAAAAAATATTGAACTA	21.9	1.4e-12	-27295	11854
SMc00058	D	SM_b21169_m4	D	-264	-239	CGTTGTGGAAAATACTTTGAACTGAA	2.8	4.4e-06	-12334	5357
SM_b21169	D	SM_b21169_m4	D	-26	-1	GCTTGTTCAAAAAATATTGAACTATT	24.8	1.6e-12	-27161	11796
SMc00058	D	SM_b21169_m5	D	-265	-238	TCGTTGTGGAAAATACTTTGAACTGAAA	1.3	4.6e-06	-12289	5337
SM_b21299	D	SM_b21169_m5	D	-212	-185	CGATTGTACATCACTTTTTCAACCTTCG	0.1	7.8e-06	-11761	5108
SMc00604	D	SM_b21180_m3	D	-194	-180	TAATAAAGTACCTGT	9.6	4.9e-06	-12226	5310
SM_b21180	R	SM_b21180_m4	R	-90	-72	CCAATGCGTCGATCAGATG	20.9	2.1e-11	-24586	10678
SM_b21181	D	SM_b21180_m4	D	-120	-102	CCAATGCGTCGATCAGATG	20.9	2.1e-11	-24586	10678
SMc00363	D	SM_b21180_m5	D	-29	-13	GCATATCAAGAACAATG	8.9	6.9e-06	-11884	5161
SMc03169	D	SM_b21180_m5	D	-172	-156	GCATATCAAGAGGAAAT	9.0	6.5e-06	-11944	5187
SM_b21180	R	SM_b21180_m5	R	-49	-33	GCATATTCAGAAGAATG	19.0	1.2e-10	-22844	9921
SM_b21181	D	SM_b21180_m5	D	-159	-143	GCATATTCAGAAGAATG	19.0	1.2e-10	-22844	9921
SMc02781	R	SM_b21187_m1	R	-149	-129	AGTTGTATAAGTTCTGTAGAT	4.8	5.8e-06	-12058	5237
SMc00140	D	SM_b21187_m1	D	-114	-94	TTTTGCAGGAAAACCGTACGA	5.2	4.8e-06	-12247	5319
SMc04315	D	SM_b21187_m1	D	-33	-13	TTTTGCAGGAATACTTCTGTA	3.8	8.8e-06	-11641	5056
SMc03899	R	SM_b21187_m1	R	-132	-112	TCTTGCAGGAAACCTGCAAAA	10.5	3.0e-07	-15019	6523
SMc03846	R	SM_b21187_m2	R	-196	-183	TAATTTCTCCAAAT	10.0	6.1e-06	-12007	5215
SM_b21186	R	SM_b21187_m2	R	-50	-37	TTTTTTCTGCAACT	13.4	1.6e-07	-15648	6796
SM_b21187	D	SM_b21187_m2	D	-180	-167	TTTTTTCTGCAACT	13.4	1.6e-07	-15648	6796
SMc02781	R	SM_b21187_m3	R	-149	-129	AGTTGTATAAGTTCTGTAGAT	6.4	3.5e-06	-12563	5456
SMc02779	R	SM_b21187_m3	R	-198	-178	TACAACATTTCTTATGCAAGG	10.1	4.8e-07	-14549	6319
SMc00679	D	SM_b21187_m3	D	-122	-102	TCCTGCAAAACTTTTGCACGA	4.8	8.0e-06	-11736	5097
SMc03899	R	SM_b21187_m3	R	-132	-112	TCTTGCAGGAAACCTGCAAAA	6.2	3.8e-06	-12481	5420
SM_b21186	R	SM_b21187_m3	R	-50	-30	TATTGCATTTTTTCTGCAACT	19.1	6.9e-10	-21094	9161
SM_b21187	D	SM_b21187_m3	D	-187	-167	TATTGCATTTTTTCTGCAACT	19.1	6.9e-10	-21094	9161
SMc02781	R	SM_b21187_m4	R	-153	-130	GTTGTATAAGTTCTGTAGATTTTT	6.3	9.3e-07	-13888	6032
SMc00140	D	SM_b21187_m4	D	-113	-90	TTTGCAGGAAAACCGTACGAATAT	4.6	2.1e-06	-13074	5678
SMc04315	D	SM_b21187_m4	D	-32	-9	TTTGCAGGAATACTTCTGTAAAAC	7.8	4.4e-07	-14636	6357
SMc04163	R	SM_b21187_m4	R	-37	-14	CGATCAGAAAAACTGAAAGATAGC	1.5	8.8e-06	-11641	5056
SMc02425	R	SM_b21187_m4	R	-103	-80	ATTGTCTACAATATGAAAGATTAT	4.7	2.0e-06	-13122	5699
SMc00679	D	SM_b21187_m4	D	-121	-98	CCTGCAAAACTTTTGCACGATTCT	1.8	7.4e-06	-11814	5131
SMc00654	D	SM_b21187_m4	D	-155	-132	ACTGCTAAAAATATTTAACATTTT	3.3	3.8e-06	-12481	5420
SMc03899	R	SM_b21187_m4	R	-136	-113	CTTGCAGGAAACCTGCAAAAACTC	1.9	7.1e-06	-11855	5149
SM_b20901	R	SM_b21187_m4	R	-275	-252	CTTGCGGAAACTCTGACATTTATT	4.0	2.8e-06	-12786	5553
SMc02560	R	SM_b21187_m5	R	-212	-200	TAAAAAATGCATA	9.8	6.7e-06	-11913	5174
SMc02562	D	SM_b21187_m5	D	-146	-134	TAAAAAATGCATA	9.8	6.7e-06	-11913	5174
SMc02240	R	SM_b21187_m5	R	-72	-60	CAAAATATGTAAG	10.3	4.8e-06	-12247	5319
SMc00300	D	SM_b21187_m5	D	-141	-129	GAAAATATGCAGC	10.0	5.8e-06	-12058	5237
SMc01875	R	SM_b21187_m5	R	-270	-258	CGAAAAATGCCCG	9.3	9.4e-06	-11575	5027
SMc02560	R	SM_b21208_m1	R	-240	-217	TCTTTAAATCGATTAATATACTGA	5.5	2.2e-06	-13027	5658
SMc02560	R	SM_b21208_m1	R	-236	-213	TTTTTCTTTAAATCGATTAATATA	4.6	3.3e-06	-12622	5481
SMc02562	D	SM_b21208_m1	D	-133	-110	TTTTTCTTTAAATCGATTAATATA	4.6	3.3e-06	-12622	5481
SMc02562	D	SM_b21208_m1	D	-129	-106	TCTTTAAATCGATTAATATACTGA	5.5	2.2e-06	-13027	5658
SMc01354	D	SM_b21208_m1	D	-69	-46	GACATAAATCGATCAATTTTATCG	3.2	5.8e-06	-12058	5237
SMa0097	R	SM_b21208_m1	R	-65	-42	TAAGTCATTCAATCGAAATAGGTA	7.2	1.1e-06	-13720	5959
SMa0101	D	SM_b21208_m1	D	-145	-122	TAAGTCATTCAATCGAAATAGGTA	7.2	1.1e-06	-13720	5959
SM_b20203	D	SM_b21208_m1	D	-49	-26	AAATTTATTCATTTGACTTCATAA	7.0	1.2e-06	-13633	5921
SM_b21208	R	SM_b21208_m1	R	-35	-12	TAAGTCAATCGATCGAATGAACTC	15.0	1.5e-08	-18015	7824
SM_b21208	R	SM_b21208_m1	R	-31	-8	CGACTAAGTCAATCGATCGAATGA	12.6	6.6e-08	-16534	7180
SMc01903	D	SM_b21208_m2	D	-124	-108	ATTCAGTTTATCGAATG	7.4	7.3e-06	-11828	5137
SMc02463	R	SM_b21208_m2	R	-157	-141	ATCAATTTAATCGATTT	6.9	9.6e-06	-11554	5018
SMa0347	D	SM_b21208_m2	D	-43	-27	ATTATTCCAATCGATTG	10.4	1.3e-06	-13553	5886
SMa0498	R	SM_b21208_m2	R	-27	-11	AATTTTTCTATCGATAG	10.6	1.1e-06	-13720	5959
SM_b21208	R	SM_b21208_m2	R	-26	-10	ACTAAGTCAATCGATCG	16.3	1.2e-08	-18238	7921
SMc01719	D	SM_b21208_m3	D	-182	-172	ATAAAGTCAAT	10.3	6.0e-06	-12024	5222
SMc02172	R	SM_b21208_m3	R	-221	-211	AATAATTCAAT	10.6	4.3e-06	-12357	5367
SMc04323	R	SM_b21208_m3	R	-59	-49	TTTAAGTCAAT	11.2	2.2e-06	-13027	5658
SM_b21102	R	SM_b21208_m3	R	-111	-101	TATAAATCAGT	9.8	8.6e-06	-11664	5066
SM_b21222	D	SM_b21208_m3	D	-66	-56	ATTAAGTCAAT	12.7	3.1e-07	-14987	6509
SM_b21208	R	SM_b21208_m3	R	-20	-10	ACTAAGTCAAT	13.8	5.7e-08	-16680	7244
SMa0097	R	SM_b21208_m4	R	-61	-45	GTCATTCAATCGAAATA	6.5	5.6e-06	-12093	5252
SMa0101	D	SM_b21208_m4	D	-142	-126	GTCATTCAATCGAAATA	6.5	5.6e-06	-12093	5252
SM_b21208	R	SM_b21208_m4	R	-31	-15	GTCAATCGATCGAATGA	13.8	8.6e-08	-16269	7066
SMc02560	R	SM_b21208_m5	R	-242	-221	TAAATCGATTAATATACTGAAT	5.7	4.2e-06	-12380	5377
SMc02560	R	SM_b21208_m5	R	-238	-217	TCTTTAAATCGATTAATATACT	8.8	8.7e-07	-13955	6060
SMc02560	R	SM_b21208_m5	R	-208	-187	CGATTCAACCGATTAAAAAATG	7.0	2.2e-06	-13027	5658
SMc02562	D	SM_b21208_m5	D	-159	-138	CGATTCAACCGATTAAAAAATG	7.0	2.2e-06	-13027	5658
SMc02562	D	SM_b21208_m5	D	-129	-108	TCTTTAAATCGATTAATATACT	8.8	8.7e-07	-13955	6060
SMc02562	D	SM_b21208_m5	D	-125	-104	TAAATCGATTAATATACTGAAT	5.7	4.2e-06	-12380	5377
SMc03046	D	SM_b21208_m5	D	-113	-92	ATTCTTAATCAACTATTAAAAT	4.3	7.5e-06	-11801	5125
SMa0097	R	SM_b21208_m5	R	-63	-42	TAAGTCATTCAATCGAAATAGG	7.8	1.4e-06	-13479	5854
SMa0101	D	SM_b21208_m5	D	-145	-124	TAAGTCATTCAATCGAAATAGG	7.8	1.4e-06	-13479	5854
SM_b20203	D	SM_b21208_m5	D	-49	-28	AAATTTATTCATTTGACTTCAT	4.4	7.1e-06	-11855	5149
SM_b21208	R	SM_b21208_m5	R	-33	-12	TAAGTCAATCGATCGAATGAAC	15.7	1.2e-08	-18238	7921
SM_b21210	R	SM_b21210_m2	R	-143	-131	TTCCGACAGCTCG	13.4	1.9e-07	-15476	6721
SM_b21210	R	SM_b21210_m2	R	-132	-120	TCCCGACAGCTTT	14.3	2.9e-08	-17356	7538
SMc01819	R	SM_b21210_m3	R	-53	-24	CAGGCATATGACGTCCGGCGCGGGCTGCCC	5.3	7.6e-06	-11787	5119
SM_b21210	R	SM_b21210_m3	R	-70	-41	GGACCATAGGACGTTTTTTCCGAGGTGCCA	26.4	1.8e-14	-31648	13745
SMc04010	R	SM_b21210_m4	R	-55	-40	GCCAGGACCTGGGGCG	9.1	9.2e-06	-11596	5036
SMa1726	R	SM_b21210_m4	R	-84	-69	TGCAGACCAGTGGGTA	9.9	5.2e-06	-12167	5284
SM_b21210	R	SM_b21210_m4	R	-159	-144	TCCAGGCTACTGGGCA	18.2	9.3e-11	-23098	10032
SMc00679	D	SM_b21210_m5	D	-61	-40	GACAACCTATCTGCCCCCTGTC	7.6	8.6e-06	-11664	5066
SMc00638	R	SM_b21210_m5	R	-347	-326	GGCAACGGTTTCACTCCCTGAC	7.5	9.2e-06	-11596	5036
SMc00638	R	SM_b21210_m5	R	-253	-232	GGCAACGGTTTCACTCCCTGAC	7.5	9.2e-06	-11596	5036
SM_b21210	R	SM_b21210_m5	R	-88	-67	GCCAACTTGTGAAGTCCCTGCC	24.6	7.2e-14	-30262	13143
SMc04323	R	SM_b21222_m1	R	-63	-46	ATATTTAAGTCAATATTC	11.0	1.0e-06	-13816	6000
SM_b21222	D	SM_b21222_m1	D	-69	-52	CTTATTAAGTCAATTGTC	18.6	5.8e-10	-21268	9237
SM_b21008	R	SM_b21222_m1	R	-60	-43	ATGAATGAGTCAAGAGGG	10.0	1.9e-06	-13174	5721
SMc02172	R	SM_b21222_m2	R	-237	-209	ATAATAATTCAATTTGATTTATTTATTGA	13.9	1.1e-09	-20628	8959
SMc00983	R	SM_b21222_m2	R	-77	-49	ACGTTAAATCATCACAGTTAACGAATTGG	-5.6	6.2e-06	-11991	5208
SMc04323	R	SM_b21222_m2	R	-75	-47	TATTTAAGTCAATATTCCTGACCTATCTT	5.5	6.9e-08	-16489	7161
SMc01592	D	SM_b21222_m2	D	-75	-47	GAAATATGTCAACCAAACTGACATATATT	2.2	2.9e-07	-15053	6538
SMc02463	R	SM_b21222_m2	R	-167	-139	AAATCAATTTAATCGATTTGACGGAAAAC	-4.9	4.8e-06	-12247	5319
SMa2215	D	SM_b21222_m2	D	-155	-127	GCAAAAAAACAAGTAAAATGCCTAAAATA	-5.0	4.8e-06	-12247	5319
SM_b20203	D	SM_b21222_m2	D	-54	-26	TTGTAAAATTTATTCATTTGACTTCATAA	-1.3	1.2e-06	-13633	5921
SM_b21222	D	SM_b21222_m2	D	-68	-40	TTATTAAGTCAATTGTCTTGACTTATTTC	31.9	1.3e-15	-34276	14886
SMc02396	D	SM_b21222_m3	D	-68	-59	CAGGGAACGC	11.3	3.0e-06	-12717	5523
SMc04291	D	SM_b21222_m3	D	-108	-99	CAGGGAACGA	11.3	3.0e-06	-12717	5523
SMc01403	R	SM_b21222_m3	R	-201	-192	CAGGGAACGC	11.3	3.0e-06	-12717	5523
SMc02172	R	SM_b21222_m4	R	-231	-211	AATAATTCAATTTGATTTATT	8.4	1.7e-06	-13285	5770
SMc04323	R	SM_b21222_m4	R	-69	-49	TTTAAGTCAATATTCCTGACC	8.0	2.2e-06	-13027	5658
SM_b21222	D	SM_b21222_m4	D	-66	-46	ATTAAGTCAATTGTCTTGACT	23.9	2.3e-12	-26798	11638
SMc00528	D	SM_b21222_m5	D	-64	-52	TTAGTCAAGACAG	11.5	2.7e-06	-12822	5569
SM_b20366	D	SM_b21222_m5	D	-99	-87	AGTGTCAATAAGA	10.3	8.1e-06	-11724	5092
SM_b21222	D	SM_b21222_m5	D	-22	-10	TGTGTCAAGAGGG	12.5	5.1e-07	-14489	6292
SM_b21008	R	SM_b21222_m5	R	-60	-48	TGAGTCAAGAGGG	12.6	4.5e-07	-14614	6347
SMc01769	D	SM_b21270_m3	D	-202	-192	CGCGGGAACGT	10.0	3.4e-06	-12592	5469
SMc00987	R	SM_b21270_m4	R	-275	-258	GTCCCGCTCCAGCGGGAA	12.5	6.3e-07	-14278	6201
SM_b21270	D	SM_b21270_m4	D	-67	-50	TTCCCGCCGGCACGGGAT	15.2	1.7e-08	-17890	7770
SM_b20162	D	SM_b21270_m5	D	-92	-76	TACGACGGCCTGGGAGA	10.3	5.1e-06	-12186	5292
SM_b21270	D	SM_b21270_m5	D	-65	-49	CCCGCCGGCACGGGATA	12.6	2.5e-07	-15202	6602
SM_b21270	D	SM_b21270_m5	D	-30	-14	CGCGACGCATTCGGAGA	13.3	7.1e-08	-16461	7149
SM_b21197	D	SM_b21270_m5	D	-26	-10	CGCGTCGCCTCCGGAGC	10.0	7.0e-06	-11870	5155
SMc01164	R	SM_b21272_m1	R	-59	-38	TCAGTCTAATCGACTAGCCATT	0.0	7.4e-06	-11814	5131
SMc03039	D	SM_b21272_m1	D	-168	-147	GGCGAGTAAGCGTTTAACCTTT	1.5	4.1e-06	-12405	5387
SM_b21272	D	SM_b21272_m1	D	-46	-25	GCAGCTTAATCGTTTAATCATC	20.6	1.5e-10	-22620	9824
SMc01104	R	SM_b21272_m2	R	-166	-145	CCTGATTAGACGATCAAAGATT	0.8	5.1e-06	-12186	5292
SMc03039	D	SM_b21272_m2	D	-168	-147	GGCGAGTAAGCGTTTAACCTTT	1.5	3.6e-06	-12535	5444
SM_b21272	D	SM_b21272_m2	D	-46	-25	GCAGCTTAATCGTTTAATCATC	20.5	1.6e-10	-22556	9796
SMc04169	D	SM_b21272_m3	D	-167	-158	ATTCGACAAG	12.2	1.5e-06	-13410	5824
SM_b21272	D	SM_b21272_m3	D	-75	-66	ATTCGACAGG	11.9	3.0e-06	-12717	5523
SMc01104	R	SM_b21272_m4	R	-174	-145	CCTGATTAGACGATCAAAGATTAAAATACG	8.0	1.1e-06	-13720	5959
SM_b21272	D	SM_b21272_m4	D	-54	-25	GATATATCGCAGCTTAATCGTTTAATCATC	19.1	5.5e-10	-21321	9260
SM_b21272	D	SM_b21272_m4	D	-46	-17	GCAGCTTAATCGTTTAATCATCCGATGCGG	11.7	1.3e-07	-15856	6886
SMc01104	R	SM_b21272_m5	R	-166	-145	CCTGATTAGACGATCAAAGATT	0.8	5.1e-06	-12186	5292
SMc03039	D	SM_b21272_m5	D	-168	-147	GGCGAGTAAGCGTTTAACCTTT	1.5	3.6e-06	-12535	5444
SM_b21272	D	SM_b21272_m5	D	-46	-25	GCAGCTTAATCGTTTAATCATC	20.5	1.6e-10	-22556	9796
SMc03874	R	SM_b21299_m1	R	-265	-246	TGTATGAAAACTATCACAAA	9.8	2.1e-06	-13074	5678
SMa1587	D	SM_b21299_m1	D	-83	-64	TGTGTGCGACAAGTCACACT	8.9	3.4e-06	-12592	5469
SM_b21299	D	SM_b21299_m1	D	-63	-44	CGTGTGATATTTCTCACAGA	18.8	5.5e-10	-21321	9260
SMc03874	R	SM_b21299_m2	R	-265	-250	TGAAAACTATCACAAA	13.9	1.3e-07	-15856	6886
SM_b21299	D	SM_b21299_m2	D	-59	-44	TGATATTTCTCACAGA	16.1	6.8e-09	-18806	8167
SMc03874	R	SM_b21299_m3	R	-267	-248	TATGAAAACTATCACAAAAA	7.2	7.3e-06	-11828	5137
SMc03874	R	SM_b21299_m3	R	-265	-246	TGTATGAAAACTATCACAAA	12.9	1.8e-07	-15530	6745
SM_b21299	D	SM_b21299_m3	D	-63	-44	CGTGTGATATTTCTCACAGA	20.0	1.3e-10	-22763	9886
SM_b21299	D	SM_b21299_m4	D	-73	-44	CCGAGGCGATCGTGTGATATTTCTCACAGA	30.4	7.9e-18	-39380	17102
SMc01852	D	SM_b21299_m5	D	-179	-166	TTCAGGCGCAACGC	10.4	4.6e-06	-12289	5337
SMc03843	R	SM_b21299_m5	R	-96	-83	TTCAGGGATAAACC	9.8	8.8e-06	-11641	5056
SM_b21299	D	SM_b21299_m5	D	-154	-141	TTCAGGGACAACCC	15.8	3.1e-09	-19592	8509
SMc00159	D	SM_b21336_m1	D	-302	-277	GTAGAGAGGGTACGGTCCGTCGGAAT	8.1	4.1e-06	-12405	5387
SM_b21080	D	SM_b21336_m1	D	-268	-243	CCAGAATGGGTATAGTGGGAGCGACT	7.1	7.6e-06	-11787	5119
SM_b21336	D	SM_b21336_m1	D	-226	-201	GCAGTTTGGGTCCAGTGGGACGGACT	30.2	6.2e-17	-37319	16208
SMc00877	D	SM_b21336_m2	D	-41	-30	ACACGGGCGAAA	10.1	8.2e-06	-11711	5086
SMc00558	D	SM_b21336_m2	D	-78	-67	AAACGGCCGACG	10.0	8.9e-06	-11629	5051
SM_b21706	R	SM_b21336_m2	R	-152	-141	AAACGGTCGAAA	9.9	9.7e-06	-11543	5013
SM_b21169	D	SM_b21336_m3	D	-22	-6	GTTCAAAAAATATTGAA	9.8	7.7e-06	-11774	5114
SM_b21336	D	SM_b21336_m4	D	-237	-223	GCCCGTTTGCGGCAG	13.3	4.6e-09	-19197	8337
SM_b21177	R	SM_b21336_m5	R	-94	-79	TCAGTTTCGTGTAGGT	7.3	6.7e-06	-11913	5174
SM_b21559	R	SM_b21336_m5	R	-93	-78	ACAGTTTGGTGAAGTG	7.0	8.1e-06	-11724	5092
SM_b21346	D	SM_b21346_m1	D	-151	-127	TTGCGCTAATATTATTAGCAGTCAA	23.7	3.3e-12	-26437	11481
SM_b21346	D	SM_b21346_m1	D	-129	-105	CAAGGCTAAAGTTATTAGCACATGC	20.5	1.6e-10	-22556	9796
SMc00485	R	SM_b21346_m2	R	-229	-220	AATGGCAAAT	9.8	8.6e-06	-11664	5066
SMc03879	R	SM_b21346_m2	R	-50	-41	ACTGGCAAAG	9.9	6.3e-06	-11975	5201
SMc02581	D	SM_b21346_m3	D	-34	-15	GCAATAGTAATACTGAATTC	8.9	7.1e-06	-11855	5149
SMc00109	R	SM_b21346_m3	R	-190	-171	ATAATATTCAAAATCAATAA	9.5	5.1e-06	-12186	5292
SMc01428	R	SM_b21346_m3	R	-126	-107	CAAATATCGTCGATCAATAT	8.7	8.0e-06	-11736	5097
SMa1948	D	SM_b21346_m3	D	-79	-60	GTAATACCGATCCGCAATAC	9.4	5.1e-06	-12186	5292
SM_b20263	D	SM_b21346_m3	D	-94	-75	CTAATTGTATTTTTAAATTG	10.0	3.5e-06	-12563	5456
SM_b21346	D	SM_b21346_m3	D	-65	-46	GAAATGGCAAAGGGCAATGG	12.9	3.6e-07	-14837	6444
SMc02782	D	SM_b21346_m4	D	-133	-124	CCCCTCCCGG	10.6	8.6e-06	-11664	5066
SM_b20387	R	SM_b21346_m4	R	-357	-348	CACCTCCCGG	10.8	5.1e-06	-12186	5292
SM_b21346	D	SM_b21346_m4	D	-217	-208	CTCCTCCCGG	10.8	5.1e-06	-12186	5292
SM_b21706	R	SM_b21346_m4	R	-238	-229	CTCCTCCCGA	10.7	7.4e-06	-11814	5131
SMc03131	R	SM_b21346_m5	R	-156	-144	TTAGTAAATCCTA	6.8	8.4e-06	-11687	5076
SM_b21346	D	SM_b21346_m5	D	-122	-110	AAAGTTATTAGCA	14.9	4.3e-08	-16962	7367
SMc02851	D	SM_b21359_m2	D	-202	-189	TCCCCCTCTCCGGG	11.4	2.5e-06	-12899	5602
SMc00363	D	SM_b21359_m2	D	-106	-93	AGCCCCCGTCCGAA	10.7	5.0e-06	-12206	5301
SMc02378	D	SM_b21359_m2	D	-391	-378	GCCCCCTGTCCGAA	11.6	2.0e-06	-13122	5699
SMc02737	D	SM_b21359_m2	D	-287	-274	GTCCCATCTCCGGA	12.4	6.4e-07	-14262	6194
SM_b21359	D	SM_b21359_m2	D	-107	-94	GTCCCAGCTCCGAA	13.7	3.6e-08	-17140	7444
SM_b21359	D	SM_b21359_m2	D	-91	-78	AGCCCATGTCCGTG	12.1	1.0e-06	-13816	6000
SM_b20859	D	SM_b21359_m2	D	-200	-187	TTCCCCCCTCCGGG	11.6	2.0e-06	-13122	5699
SMc01935	D	SM_b21359_m3	D	-29	-14	AGCCGTCCCTTCTCCG	10.4	2.0e-06	-13122	5699
SMa0520	D	SM_b21359_m3	D	-281	-266	AGCCGCAGCGGCTCCA	9.9	2.9e-06	-12751	5538
SM_b21359	D	SM_b21359_m3	D	-111	-96	AGCCGTCCCAGCTCCG	14.8	9.3e-08	-16191	7032
SMa1698	R	SM_b21359_m4	R	-328	-317	CGACGGGGCGTG	10.7	7.0e-06	-11870	5155
SM_b21336	D	SM_b21359_m4	D	-172	-161	AGACGTTGCGAC	10.7	7.0e-06	-11870	5155
SM_b21359	D	SM_b21359_m4	D	-129	-118	AGACGGTGCGGG	11.6	1.3e-06	-13553	5886
SM_b21359	D	SM_b21359_m4	D	-28	-17	CAACGTAGCGTC	12.4	2.1e-07	-15376	6678
SM_b20873	R	SM_b21359_m4	R	-65	-54	AAACGTGGCGTC	10.8	6.1e-06	-12007	5215
SMc00766	D	SM_b21359_m5	D	-165	-139	GGCTCGAACCTCTCGTCCCAGGGACGG	5.4	2.0e-06	-13122	5699
SM_b20523	R	SM_b21359_m5	R	-369	-343	GCATGTGACCTTCATGCACACCGACAT	4.1	3.9e-06	-12455	5409
SM_b20525	D	SM_b21359_m5	D	-179	-153	GCATGTGACCTTCATGCACACCGACAT	4.1	3.9e-06	-12455	5409
SM_b21372	R	SM_b21372_m1	R	-36	-11	ATCTTTCGGAATATTCACCGATCACG	19.5	9.6e-11	-23067	10018
SMc02172	R	SM_b21372_m3	R	-101	-92	CCGATCACGG	11.1	2.2e-06	-13027	5658
SM_b21372	R	SM_b21372_m3	R	-37	-28	CCGATCACGG	11.1	2.2e-06	-13027	5658
SM_b20942	D	SM_b21372_m3	D	-197	-188	CCGATCACGC	10.7	6.0e-06	-12024	5222
SMc02838	D	SM_b21372_m4	D	-26	-6	ATAATTCACAAAGAGGAAATC	9.9	6.7e-06	-11913	5174
SM_b20004	R	SM_b21372_m4	R	-36	-16	ATTATTGCACCATGTGAAATG	10.0	6.0e-06	-12024	5222
SM_b21079	D	SM_b21372_m4	D	-40	-20	TATATTATGCAAGTTTAAAGA	10.4	3.8e-06	-12481	5420
SM_b20946	R	SM_b21372_m4	R	-268	-248	GTTATTTCGGATTATAAAGTA	9.6	9.4e-06	-11575	5027
SM_b20946	R	SM_b21372_m4	R	-177	-157	AATATTACGAAGAGTTAATTT	9.9	6.7e-06	-11913	5174
SMc04093	R	SM_b21372_m5	R	-58	-48	CGGCGGAAAAC	10.3	2.5e-06	-12899	5602
SMc00120	R	SM_b21419_m1	R	-165	-156	TAAAAAGTCC	11.1	4.0e-06	-12429	5398
SMa0247	D	SM_b21419_m1	D	-80	-71	CAAAAAGTCA	11.4	2.0e-06	-13122	5699
SMa0247	D	SM_b21419_m2	D	-80	-64	CAAAAAGTCATACTAGA	10.0	6.7e-06	-11913	5174
SMc03038	D	SM_b21419_m3	D	-36	-23	TCCCTTCTTATCAG	11.6	2.0e-06	-13122	5699
SMc02603	D	SM_b21419_m3	D	-26	-13	CCCCTCATCATCAG	11.9	1.3e-06	-13553	5886
SM_b21419	R	SM_b21419_m3	R	-16	-3	CCCCTCAGGATCAC	13.6	6.8e-08	-16504	7167
SMa0247	D	SM_b21419_m4	D	-80	-67	CAAAAAGTCATACT	14.2	3.2e-08	-17258	7495
SM_b21080	D	SM_b21419_m4	D	-75	-62	CAAAAAATGACATT	9.6	8.8e-06	-11641	5056
SMc02893	D	SM_b21464_m1	D	-35	-15	GTGCCTGGATAAAACCTGTGC	5.3	4.0e-06	-12429	5398
SMc03038	D	SM_b21464_m1	D	-113	-93	AGGACGGGCTAACTCCAGAAA	3.6	9.3e-06	-11585	5032
SMc03062	D	SM_b21464_m1	D	-193	-173	GCTACTGCATGTGTCCTTTAA	4.3	6.9e-06	-11884	5161
SM_b21464	D	SM_b21464_m1	D	-185	-165	GCTACTGGATATAACCAGTTA	24.8	1.1e-12	-27536	11959
SM_b21464	D	SM_b21464_m2	D	-184	-157	CTACTGGATATAACCAGTTATGTCAATT	33.7	1.2e-18	-41264	17921
SM_b21464	D	SM_b21464_m2	D	-131	-104	CCACTGCCGATCGCCGGCGTAGTCAGCG	19.3	2.5e-10	-22110	9602
SM_b21464	D	SM_b21464_m3	D	-114	-105	CGTAGTCAGC	13.1	4.0e-07	-14732	6398
SM_b21464	D	SM_b21464_m4	D	-184	-165	CTACTGGATATAACCAGTTA	25.3	7.8e-13	-27879	12108
SM_b21079	D	SM_b21464_m5	D	-133	-113	ACAACTAATTATGCCAAGTCA	2.2	7.0e-06	-11870	5155
SM_b21464	D	SM_b21464_m5	D	-185	-165	GCTACTGGATATAACCAGTTA	25.5	8.5e-13	-27794	12071
SM_b20292	R	SM_b21484	R	-125	-114	CGCAGAAGGGCA	10.6	3.4e-06	-12592	5469
SM_b21484	D	SM_b21484	D	-23	-12	GGCAGAAGGGCA	11.7	3.9e-07	-14757	6409
SMc03060	R	SM_b21484	R	-188	-169	GGAAGGAAAGCTCTTGACTC	10.1	5.0e-06	-12206	5301
SMc03061	D	SM_b21484	D	-153	-134	GGAAGGAAAGCTCTTGACTC	10.1	5.0e-06	-12206	5301
SMc01593	D	SM_b21484	D	-95	-76	TGAATGAGAATGGGTGACCG	10.2	4.6e-06	-12289	5337
SMc00652	R	SM_b21484	R	-326	-307	GGAAGAGCCGGTCATGACGG	10.1	5.0e-06	-12206	5301
SMc00651	D	SM_b21484	D	-62	-43	GGAAGAGCCGGTCATGACGG	10.1	5.0e-06	-12206	5301
SMc02101	D	SM_b21484	D	-89	-80	GGGAGAAATC	11.1	4.0e-06	-12429	5398
SM_b21484	D	SM_b21484	D	-39	-30	TGGAGAAATC	10.9	6.4e-06	-11959	5194
SM_b20039	R	SM_b21484	R	-69	-57	CGATACCGGAGAA	11.0	1.5e-06	-13410	5824
SMc02053	R	SM_b21484	R	-90	-80	CAATACTCGAT	10.1	6.2e-06	-11991	5208
SMc00953	R	SM_b21484	R	-140	-130	CAATATACGAC	9.7	8.4e-06	-11687	5076
SM_b20069	D	SM_b21484	D	-85	-75	CAATATTCGCC	10.7	3.4e-06	-12592	5469
SM_b21484	D	SM_b21484	D	-13	-3	CAATATTCGAC	13.5	3.1e-07	-14987	6509
SMc01310	D	SM_b21493_m1	D	-62	-49	CGAATACTTCAAGT	10.4	7.5e-06	-11801	5125
SMc01209	D	SM_b21493_m1	D	-246	-233	AAAATAGAGCAAGT	12.7	8.4e-08	-16292	7076
SMc00947	D	SM_b21493_m1	D	-115	-102	GAAATTTCGCAATC	10.3	7.5e-06	-11801	5125
SMa0372	R	SM_b21493_m1	R	-49	-36	GGAATATTGCAATT	10.2	8.4e-06	-11687	5076
SM_b20366	D	SM_b21493_m1	D	-44	-31	AAAATAGTGCAATT	11.4	1.5e-06	-13410	5824
SM_b21493	R	SM_b21493_m1	R	-111	-98	GGAATACAGCAAGC	12.4	2.3e-07	-15285	6638
SM_b21494	D	SM_b21493_m1	D	-33	-20	GGAATACAGCAAGC	12.4	2.3e-07	-15285	6638
SMc01903	D	SM_b21493_m2	D	-194	-175	AGAATTGGAAAATTGTTCTA	8.7	4.8e-06	-12247	5319
SMc00191	R	SM_b21493_m2	R	-244	-225	AAATTGAGGAAATGGTTAAC	7.5	9.6e-06	-11554	5018
SMc02520	D	SM_b21493_m2	D	-48	-29	CGATTGCACAAATTGTGCGC	7.8	8.0e-06	-11736	5097
SM_b21493	R	SM_b21493_m2	R	-33	-14	CGACTGGAAAAATTGCTCAG	21.8	1.6e-12	-27161	11796
SM_b21494	D	SM_b21493_m2	D	-117	-98	CGACTGGAAAAATTGCTCAG	21.8	1.6e-12	-27161	11796
SMc00947	D	SM_b21493_m3	D	-330	-316	ACCGAAAGCGCAAGA	10.6	3.6e-06	-12535	5444
SM_b20292	R	SM_b21493_m3	R	-89	-75	GTCGGACGCGCAAAG	10.5	4.3e-06	-12357	5367
SM_b21346	D	SM_b21493_m3	D	-68	-54	AACGAAATGGCAAAG	11.0	2.5e-06	-12899	5602
SMc04331	D	SM_b21493_m4	D	-198	-178	ACCGCGGAATAATGCGCTACC	9.0	2.7e-06	-12822	5569
SMa5007	R	SM_b21493_m4	R	-123	-103	CCAGCCCCACGATGCGGTACT	7.9	5.2e-06	-12167	5284
SM_b21493	R	SM_b21493_m4	R	-90	-70	CCAGCGCGCTCAATCGCTACC	18.6	9.2e-10	-20807	9036
SM_b21494	D	SM_b21493_m4	D	-61	-41	CCAGCGCGCTCAATCGCTACC	18.6	9.2e-10	-20807	9036
SMc01903	D	SM_b21493_m5	D	-194	-175	AGAATTGGAAAATTGTTCTA	8.6	8.9e-06	-11629	5051
SMc00191	R	SM_b21493_m5	R	-244	-225	AAATTGAGGAAATGGTTAAC	8.8	7.7e-06	-11774	5114
SMc02520	D	SM_b21493_m5	D	-48	-29	CGATTGCACAAATTGTGCGC	11.3	1.1e-06	-13720	5959
SM_b21493	R	SM_b21493_m5	R	-33	-14	CGACTGGAAAAATTGCTCAG	12.8	3.1e-07	-14987	6509
SM_b21494	D	SM_b21493_m5	D	-117	-98	CGACTGGAAAAATTGCTCAG	12.8	3.1e-07	-14987	6509
SM_b20705	D	SM_b21493_m5	D	-183	-164	CAATTTCGCAAATTGCTATC	9.8	3.7e-06	-12507	5432
SMc02818	D	SM_b21525_m2	D	-159	-145	ACAAATAGCCCCATA	10.6	3.6e-06	-12535	5444
SMc01570	R	SM_b21525_m2	R	-41	-27	GACGATAGGTCCACA	10.5	4.0e-06	-12429	5398
SMc01610	D	SM_b21525_m3	D	-72	-60	TAAACTTGACTTA	10.0	6.3e-06	-11975	5201
SM_b21525	R	SM_b21525_m3	R	-27	-15	CCAACTGGACTCA	14.6	2.2e-08	-17632	7658
SMa5007	R	SM_b21525_m5	R	-394	-379	TCCCAATTTGGAAATT	9.9	5.7e-06	-12075	5244
SMa2015	R	SM_b21533_m1	R	-395	-379	CCACCAAAAACGACAAA	9.7	2.7e-06	-12822	5569
SM_b21533	D	SM_b21533_m1	D	-116	-100	TCACAAAACATCACAAA	19.7	4.8e-11	-23760	10319
SMc02678	R	SM_b21533_m2	R	-58	-43	CTCACAGGACGCAACA	9.5	6.8e-06	-11899	5167
SM_b21533	D	SM_b21533_m2	D	-107	-92	ATCACAAATCGCAAAT	14.8	4.3e-08	-16962	7367
SM_b21533	D	SM_b21533_m2	D	-26	-11	CACAAATATTGCAACA	15.5	1.3e-08	-18158	7886
SMc01885	D	SM_b21533_m3	D	-185	-173	GCGTCCTGCACCA	12.0	1.1e-06	-13720	5959
SM_b21533	D	SM_b21533_m3	D	-74	-62	CCGTCCTGCACCG	13.8	6.6e-08	-16534	7180
SM_b21533	D	SM_b21533_m4	D	-89	-67	TGCACCGCATCGCAGCCGTCCTG	20.5	1.3e-10	-22763	9886
SM_b21533	D	SM_b21533_m4	D	-68	-46	TGCACCGCGCGCTTCATGTCCGC	20.1	2.2e-10	-22237	9658
SM_b21600	R	SM_b21533_m4	R	-229	-207	TGCACTGCATCCGTCGCCTCCGG	6.7	5.6e-06	-12093	5252
SM_b21533	D	SM_b21533_m5	D	-122	-110	TACGGCTCACAAA	16.2	7.0e-09	-18777	8155
SM_b21008	R	SM_b21533_m5	R	-87	-75	TACGGCGCACAAA	14.4	5.6e-08	-16698	7252
SM_b21559	R	SM_b21559_m1	R	-250	-226	AAAGTAAGAGTGCCCTGCCCCTCTC	24.2	1.3e-12	-27369	11886
SM_b21559	R	SM_b21559_m1	R	-102	-78	ACAGTTTGGTGAAGTGACGGCTCGT	23.2	7.2e-12	-25657	11143
SM_b20946	R	SM_b21559_m1	R	-287	-263	AAAGTATTGTTAATAGACGCATCAT	5.7	4.4e-06	-12334	5357
SMc02305	D	SM_b21559_m2	D	-94	-81	TCACCGCATCTCCA	10.2	4.4e-06	-12334	5357
SMc04305	R	SM_b21559_m2	R	-167	-154	TCACGGCGTCACGA	9.8	6.0e-06	-12024	5222
SMc02147	D	SM_b21559_m3	D	-28	-14	GTCGTCGAGGTGCAG	9.3	8.5e-06	-11675	5071
SMc04055	R	SM_b21559_m3	R	-105	-91	AGAGTGGAGTTGCAG	10.3	3.7e-06	-12507	5432
SM_b21559	R	SM_b21559_m3	R	-216	-202	CGCGTCGAGATGCCG	13.8	1.7e-07	-15587	6770
SM_b21559	R	SM_b21559_m3	R	-126	-112	AGCGTGTACTTGCAC	15.4	8.3e-09	-18607	8081
SMa0307	R	SM_b21559_m4	R	-39	-14	GAGGAGGAACTTGCAAGTCACTCCGC	6.1	3.7e-06	-12507	5432
SM_b20263	D	SM_b21559_m4	D	-55	-30	GAATAGTGCGCGCGCCGTCACACCGA	5.7	4.7e-06	-12268	5328
SM_b21559	R	SM_b21559_m4	R	-255	-230	TAAGAGTGCCCTGCCCCTCTCTCCGA	32.3	5.7e-17	-37403	16244
SMc02166	D	SM_b21559_m5	D	-106	-85	TATCGAGGCGCGGTTTCACCAC	6.0	8.4e-06	-11687	5076
SMa1299	D	SM_b21559_m5	D	-118	-97	TATCGGCTCCCAACCTCACCAC	6.8	5.4e-06	-12129	5268
SM_b21559	R	SM_b21559_m5	R	-157	-136	TAACGGCTCAGCGTGACACCAC	22.4	6.1e-12	-25823	11215
SMc00107	R	SM_b21569_m1	R	-38	-24	CTCCTGACACGACCT	10.1	3.4e-06	-12592	5469
SMc02119	R	SM_b21569_m2	R	-81	-69	GGGGAGCGGCCGC	9.8	9.1e-06	-11607	5041
SM_b21569	R	SM_b21569_m2	R	-45	-33	GGGGACCTGCCTG	14.0	1.8e-08	-17833	7745
SMc03978	D	SM_b21569_m3	D	-36	-24	CGTCCCCTGACCA	9.4	4.4e-06	-12334	5357
SMc03104	R	SM_b21569_m3	R	-108	-96	CGGCCCCAGACCT	8.9	7.0e-06	-11870	5155
SMc00983	R	SM_b21569_m4	R	-324	-304	GCCGGGCCGGTCCTCAGGCTT	11.2	1.0e-06	-13816	6000
SMc00953	R	SM_b21569_m4	R	-24	-4	GGCAGGAAGGCCCTAACCCTG	9.1	4.2e-06	-12380	5377
SMc00548	D	SM_b21569_m5	D	-21	-7	GATCCATCAAGGACT	9.9	5.3e-06	-12148	5276
SM_b21569	R	SM_b21569_m5	R	-22	-8	GGTCCTTCTAGGAGT	15.4	9.6e-09	-18462	8018
SMc02447	R	SM_b21576_m1	R	-237	-226	TCATTGAAACAG	10.6	3.5e-06	-12563	5456
SM_b21093	R	SM_b21576_m1	R	-128	-117	TTGTTGAAATAA	11.2	1.7e-06	-13285	5770
SMc00780	R	SM_b21576_m2	R	-70	-58	TGAATTGTTGAAA	10.4	5.0e-06	-12206	5301
SMc00781	D	SM_b21576_m2	D	-62	-50	TGAATTGTTGAAA	10.4	5.0e-06	-12206	5301
SMc02059	R	SM_b21576_m2	R	-90	-78	CAAATCCTTGAAT	11.0	3.1e-06	-12684	5509
SMc02058	D	SM_b21576_m2	D	-265	-253	CAAATCCTTGAAT	11.0	3.1e-06	-12684	5509
SM_b21021	D	SM_b21576_m3	D	-199	-176	ATAGCTCAATTGTCGTCAATATGC	7.5	6.9e-06	-11884	5161
SMc01428	R	SM_b21576_m4	R	-29	-14	TTCAATAGCCATGGAA	9.2	2.2e-06	-13027	5658
SMc02030	R	SM_b21576_m4	R	-153	-138	TTCAGTGTTCATTTAA	7.4	6.0e-06	-12024	5222
SMa2163	D	SM_b21576_m4	D	-132	-117	CTCACGGACTATTGAA	7.1	7.4e-06	-11814	5131
SM_b21169	D	SM_b21576_m4	D	-21	-6	TTCAAAAAATATTGAA	10.0	1.4e-06	-13479	5854
SMc02447	R	SM_b21576_m5	R	-237	-222	TGATTCATTGAAACAG	8.0	9.4e-06	-11575	5027
SM_b21272	D	SM_b21576_m5	D	-41	-26	TTAATCGTTTAATCAT	10.2	2.5e-06	-12899	5602
SMc02172	R	SM_b21598_m1	R	-84	-63	GTACCTTAAAGCTTTACCGCGA	5.7	2.1e-06	-13074	5678
SM_b21598	D	SM_b21598_m1	D	-198	-177	CCACCGTAAACGTTTACGGAAC	24.8	1.4e-12	-27295	11854
SMc00036	D	SM_b21598_m2	D	-17	-6	TTGGGAGGAAGA	10.8	3.8e-06	-12481	5420
SMc00570	R	SM_b21598_m2	R	-222	-211	TGGAGAGGAAAA	11.1	2.6e-06	-12860	5585
SMc00571	D	SM_b21598_m2	D	-128	-117	TGGAGAGGAAAA	11.1	2.6e-06	-12860	5585
SMc04411	D	SM_b21598_m2	D	-65	-54	AAGAGAGGAAAA	11.8	1.0e-06	-13816	6000
SM_b20033	R	SM_b21598_m2	R	-242	-231	TGGGGAGGAGAA	10.0	7.7e-06	-11774	5114
SM_b20069	D	SM_b21598_m2	D	-21	-10	CAGGGAGGAAAG	10.3	6.0e-06	-12024	5222
SM_b20448	D	SM_b21598_m2	D	-17	-6	AAGGGAGGAAGC	9.8	9.5e-06	-11564	5022
SM_b21196	D	SM_b21598_m2	D	-166	-155	AAGGGAGGAAAT	10.9	3.1e-06	-12684	5509
SM_b21598	D	SM_b21598_m2	D	-23	-12	TAGAGAGGAAAA	12.2	7.6e-07	-14090	6119
SMc04134	D	SM_b21598_m3	D	-192	-181	TCCTCCTCCCTT	12.1	8.6e-07	-13966	6066
SMc04291	D	SM_b21598_m3	D	-277	-266	TTTTCCTCCCAA	10.1	7.2e-06	-11841	5143
SMc01588	R	SM_b21598_m3	R	-45	-34	TTCCCCTCCCCA	10.0	7.7e-06	-11774	5114
SMc03165	R	SM_b21598_m3	R	-15	-4	TCTTCCTCCCGG	10.9	3.3e-06	-12622	5481
SMc03122	R	SM_b21598_m3	R	-13	-2	TGTCCCTCCCTT	9.7	9.6e-06	-11554	5018
SMc02470	D	SM_b21598_m3	D	-229	-218	TTCTCCTCCCAT	11.0	2.9e-06	-12751	5538
SMc04093	R	SM_b21598_m3	R	-16	-5	TTTTCCTCCCTG	11.6	1.7e-06	-13285	5770
SMa5030	D	SM_b21598_m3	D	-83	-72	CTCTCCTCCCCG	10.8	3.9e-06	-12455	5409
SMc02172	R	SM_b21598_m4	R	-84	-63	GTACCTTAAAGCTTTACCGCGA	4.7	4.1e-06	-12405	5387
SM_b21598	D	SM_b21598_m4	D	-198	-177	CCACCGTAAACGTTTACGGAAC	24.7	1.4e-12	-27295	11854
SMc02172	R	SM_b21598_m5	R	-84	-63	GTACCTTAAAGCTTTACCGCGA	3.8	4.5e-06	-12311	5347
SM_b21598	D	SM_b21598_m5	D	-198	-177	CCACCGTAAACGTTTACGGAAC	24.8	1.5e-12	-27226	11824
SM_b20129	D	SM_b21601_m2	D	-300	-275	AAAAGGAACGATATAGTATATTATCA	11.0	9.5e-07	-13867	6022
SM_b21317	D	SM_b21601_m2	D	-78	-53	GCAATTTCGGGGCAGGGGTGTTATGA	9.8	2.1e-06	-13074	5678
SMc03893	D	SM_b21601_m4	D	-63	-45	CTTATGAATCACGATCCGT	10.6	2.1e-06	-13074	5678
SMa0078	D	SM_b21601_m4	D	-31	-13	TCCACGCATTCTGTTCCGA	11.5	9.2e-07	-13899	6036
SM_b21601	R	SM_b21601_m4	R	-99	-81	TTTACGAATTCCGATCCGA	20.5	1.3e-11	-25066	10886
SM_b21601	R	SM_b21601_m5	R	-80	-61	CAATTGTCGCATTGTTTCGT	19.6	5.3e-12	-25963	11276
SMc01120	D	SM_b21641_m1	D	-33	-16	GGGCGCCGCGCGGCGTTG	8.9	7.9e-06	-11749	5102
SMc03062	D	SM_b21641_m1	D	-106	-89	ATAAGACGCGCGGCGCTG	14.8	5.4e-08	-16734	7268
SMc00150	R	SM_b21641_m1	R	-145	-128	CCGCGCCCCGCGTCTCGC	8.8	8.5e-06	-11675	5071
SMc00149	D	SM_b21641_m1	D	-344	-327	CCGCGCCCCGCGTCTCGC	8.8	8.5e-06	-11675	5071
SMc04175	D	SM_b21641_m1	D	-329	-312	ATAAGACGCGCGGCGCTG	14.8	5.4e-08	-16734	7268
SMc04175	D	SM_b21641_m1	D	-226	-209	ATAAGACGCGCGGCGCCG	12.4	5.5e-07	-14413	6260
SMc02438	R	SM_b21641_m1	R	-78	-61	AAAAGACGCGCGGCGCCG	12.2	6.6e-07	-14231	6180
SMc03820	R	SM_b21641_m1	R	-175	-158	ATGAGACGCACGGCGTTG	10.1	3.7e-06	-12507	5432
SM_b20935	R	SM_b21641_m1	R	-164	-147	GTGAGACGCGCGGTGCTG	9.3	6.0e-06	-12024	5222
SM_b20946	R	SM_b21641_m1	R	-128	-111	CTGCGCCGCCCGTCTCGC	9.1	7.0e-06	-11870	5155
SM_b20859	D	SM_b21641_m1	D	-314	-297	ATAAGACGCGCGGCGCTG	14.8	5.4e-08	-16734	7268
SM_b21641	R	SM_b21641_m1	R	-216	-199	ATGAGACGCGCGGCGCTG	16.1	8.2e-09	-18619	8086
SMc02141	D	SM_b21641_m2	D	-84	-69	GAGAGGGGCGGCGCTT	10.3	4.5e-06	-12311	5347
SMc02296	R	SM_b21641_m2	R	-48	-33	CAGACGCGCGGCGGCG	9.8	7.9e-06	-11749	5102
SMc03062	D	SM_b21641_m2	D	-104	-89	AAGACGCGCGGCGCTG	13.0	1.2e-07	-15936	6921
SMc00581	R	SM_b21641_m2	R	-102	-87	AAGACGCGCGGCGCCG	11.7	8.5e-07	-13978	6071
SMc04175	D	SM_b21641_m2	D	-327	-312	AAGACGCGCGGCGCTG	13.0	1.2e-07	-15936	6921
SMc04175	D	SM_b21641_m2	D	-224	-209	AAGACGCGCGGCGCCG	11.7	8.5e-07	-13978	6071
SMc02438	R	SM_b21641_m2	R	-78	-63	AAGACGCGCGGCGCCG	11.7	8.5e-07	-13978	6071
SMc03124	R	SM_b21641_m2	R	-371	-356	CAGACGCGCAGCGTTG	11.3	1.4e-06	-13479	5854
SMc03123	D	SM_b21641_m2	D	-30	-15	CAGACGCGCAGCGTTG	11.3	1.4e-06	-13479	5854
SMc03820	R	SM_b21641_m2	R	-175	-160	GAGACGCACGGCGTTG	12.4	3.1e-07	-14987	6509
SMc03873	R	SM_b21641_m2	R	-100	-85	GGGACGGATGGCGCTG	10.0	6.3e-06	-11975	5201
SM_b20859	D	SM_b21641_m2	D	-312	-297	AAGACGCGCGGCGCTG	13.0	1.2e-07	-15936	6921
SM_b21641	R	SM_b21641_m2	R	-216	-201	GAGACGCGCGGCGCTG	14.4	3.2e-09	-19560	8495
SMc00088	R	SM_b21641_m3	R	-167	-154	AGAAACGCCCTATT	9.6	8.2e-06	-11711	5086
SMc02818	D	SM_b21641_m3	D	-189	-176	CCAAACCCTCTAAA	13.1	2.6e-07	-15163	6585
SM_b21641	R	SM_b21641_m3	R	-155	-142	TGAAACGCTCTAAA	14.9	9.1e-09	-18515	8041
SMc00150	R	SM_b21641_m4	R	-146	-129	CGCGCCCCGCGTCTCGCC	10.6	1.2e-06	-13633	5921
SMc00149	D	SM_b21641_m4	D	-343	-326	CGCGCCCCGCGTCTCGCC	10.6	1.2e-06	-13633	5921
SM_b21641	R	SM_b21641_m4	R	-40	-23	GCCGCACGGTTCCTCATC	9.5	9.0e-06	-11618	5046
SMc02523	R	SM_b21641_m5	R	-103	-91	CGCCGCGAGTCTC	11.6	1.6e-06	-13346	5796
SMc02484	R	SM_b21641_m5	R	-114	-102	AGACGCGCGTCCC	10.0	7.3e-06	-11828	5137
SM_b20946	R	SM_b21641_m5	R	-126	-114	CGCCGCCCGTCTC	11.5	2.1e-06	-13074	5678
SM_b21641	R	SM_b21641_m5	R	-244	-232	AGCCGCTCGTGCC	10.9	3.2e-06	-12652	5495
SM_b21641	R	SM_b21641_m5	R	-198	-186	CGCCGCGCGTCCG	12.0	8.0e-07	-14039	6097
SMc01200	R	SM_b21650_m1	R	-22	-13	TGAGTAAATT	9.6	5.8e-06	-12058	5237
SMc03131	R	SM_b21650_m1	R	-153	-144	TTAGTAAATC	11.7	1.1e-06	-13720	5959
SMa0303	D	SM_b21650_m1	D	-30	-21	TGAGTAAAAT	8.9	9.3e-06	-11585	5032
SM_b20033	R	SM_b21650_m1	R	-166	-157	TTAGTACATT	10.3	2.9e-06	-12751	5538
SMc02392	D	SM_b21650_m2	D	-337	-324	ATTTTCGTAAAATT	8.3	8.6e-06	-11664	5066
SM_b21650	D	SM_b21650_m2	D	-57	-44	AATTTACTAAACGG	14.8	9.0e-08	-16223	7046
SMc04134	D	SM_b21650_m3	D	-76	-53	TTGACTTGTAAATTATTATGACAA	2.8	7.7e-06	-11774	5114
SMc01768	D	SM_b21650_m3	D	-94	-71	GGTTTAAGTAGAATTTTATACGTA	2.7	7.7e-06	-11774	5114
SMc00638	R	SM_b21650_m4	R	-132	-107	ATTAACTACAAAAATTTACCTTGAAT	7.0	6.8e-06	-11899	5167
SM_b21650	D	SM_b21650_m4	D	-69	-44	AGCCGCGATAAAAATTTACTAAACGG	16.9	4.6e-09	-19197	8337
SMc00159	D	SM_b21650_m5	D	-145	-120	AACGCGAATAAAGATTTCCTAAAAGG	5.4	5.7e-06	-12075	5244
SMc01403	R	SM_b21650_m5	R	-95	-70	CGGCTTGCTAAAATTTGGCCAAGCGC	5.0	7.1e-06	-11855	5149
SM_b21650	D	SM_b21650_m5	D	-69	-44	AGCCGCGATAAAAATTTACTAAACGG	27.1	9.1e-15	-32331	14041
SMc01209	D	SM_b21706_m1	D	-38	-17	CGTGACAAAAGGCTTCACCAAA	2.2	8.5e-06	-11675	5071
SM_b21706	R	SM_b21706_m1	R	-300	-279	GCTGAGAAAAGGTTTTCTCACC	21.2	1.2e-10	-22844	9921
SM_b21706	R	SM_b21706_m1	R	-267	-246	AATGAGAAAACCTTTTCTCAAT	23.4	3.3e-12	-26437	11481
SM_b21706	R	SM_b21706_m2	R	-300	-279	GCTGAGAAAAGGTTTTCTCACC	21.3	1.1e-10	-22931	9959
SM_b21706	R	SM_b21706_m2	R	-267	-246	AATGAGAAAACCTTTTCTCAAT	23.5	4.0e-12	-26245	11398
SMc01152	D	SM_b21706_m3	D	-178	-166	CGGTTTTCTCAAA	9.5	7.2e-06	-11841	5143
SMc03258	R	SM_b21706_m3	R	-68	-56	AGCTTATCTCACG	10.6	1.7e-06	-13285	5770
SM_b20129	D	SM_b21706_m3	D	-357	-345	CGGTTTTCTCATG	9.9	4.6e-06	-12289	5337
SM_b21186	R	SM_b21706_m3	R	-59	-47	AACTTTTCTCAGG	10.2	2.9e-06	-12751	5538
SM_b21187	D	SM_b21706_m3	D	-170	-158	AACTTTTCTCAGG	10.2	2.9e-06	-12751	5538
SM_b21706	R	SM_b21706_m3	R	-300	-288	AGGTTTTCTCACC	13.7	4.9e-07	-14529	6310
SM_b21706	R	SM_b21706_m3	R	-267	-255	ACCTTTTCTCAAT	14.2	1.5e-07	-15713	6824
SMc01209	D	SM_b21706_m4	D	-38	-17	CGTGACAAAAGGCTTCACCAAA	2.5	6.3e-06	-11975	5201
SM_b21706	R	SM_b21706_m4	R	-300	-279	GCTGAGAAAAGGTTTTCTCACC	21.4	1.0e-10	-23026	10000
SM_b21706	R	SM_b21706_m4	R	-267	-246	AATGAGAAAACCTTTTCTCAAT	23.4	5.1e-12	-26002	11292
SMc01209	D	SM_b21706_m5	D	-38	-17	CGTGACAAAAGGCTTCACCAAA	2.2	8.3e-06	-11699	5081
SM_b21706	R	SM_b21706_m5	R	-300	-279	GCTGAGAAAAGGTTTTCTCACC	21.3	1.2e-10	-22844	9921
SM_b21706	R	SM_b21706_m5	R	-267	-246	AATGAGAAAACCTTTTCTCAAT	23.4	3.6e-12	-26350	11444
SMa0063	D	SMa0063_m1	D	-44	-33	GCACAGGTTAAT	10.9	3.4e-06	-12592	5469
SMc00820	R	SMa0063_m2	R	-21	-8	GAATACCTATAAGA	9.5	4.4e-06	-12334	5357
SMc00821	D	SMa0063_m2	D	-207	-194	GAATACCTATAAGA	9.5	4.4e-06	-12334	5357
SMc00679	D	SMa0063_m2	D	-61	-48	GACAACCTATCTGC	11.3	1.2e-06	-13633	5921
SMc03961	D	SMa0063_m2	D	-54	-41	ACAATCCTATCCTA	9.5	4.4e-06	-12334	5357
SMa0063	D	SMa0063_m2	D	-32	-19	GCAAACCTATCTGA	15.5	2.9e-08	-17356	7538
SM_b20285	R	SMa0063_m2	R	-49	-36	TAAAACGTATCTTA	9.5	4.4e-06	-12334	5357
SMc00831	R	SMa0063_m3	R	-81	-59	GTCCACCTCTATAAAAGGTTTGA	11.4	2.0e-07	-15425	6699
SMc04163	R	SMa0063_m3	R	-42	-20	GAAAAACTGAAAGATAGCTTAAC	4.6	8.1e-06	-11724	5092
SMa0063	D	SMa0063_m3	D	-104	-82	TAGCACCTCCCAAACAGATTTTT	12.5	9.7e-08	-16149	7013
SMa0063	D	SMa0063_m3	D	-32	-10	GCAAACCTATCTGATAGGTTGGA	23.3	3.0e-12	-26532	11523
SMa0063	D	SMa0063_m4	D	-44	-33	GCACAGGTTAAT	13.0	2.9e-07	-15053	6538
SMc00820	R	SMa0063_m5	R	-23	-10	ATACCTATAAGATT	10.6	1.9e-06	-13174	5721
SMc00821	D	SMa0063_m5	D	-205	-192	ATACCTATAAGATT	10.6	1.9e-06	-13174	5721
SMa0063	D	SMa0063_m5	D	-30	-17	AAACCTATCTGATA	17.7	1.2e-09	-20541	8921
SMa0078	D	SMa0078_m1	D	-68	-40	GGAATTGCTCTAGCGATTGACCGTCGACT	22.1	3.0e-12	-26532	11523
SMa0078	D	SMa0078_m1	D	-39	-11	ATAATCCCTCCACGCATTCTGTTCCGATC	19.7	1.6e-10	-22556	9796
SMc02094	D	SMa0078_m2	D	-128	-103	TGGAATTGAAGTAAACAGAAATTAAC	5.4	8.7e-06	-11652	5060
SMc02846	D	SMa0078_m3	D	-128	-118	GGAATTTCCGC	9.9	8.7e-06	-11652	5060
SMa0078	D	SMa0078_m3	D	-136	-126	AGAATTTCCGC	12.4	6.9e-07	-14187	6161
SMa0078	D	SMa0078_m4	D	-178	-164	TGCAGCCGCAAGGTT	13.2	2.7e-07	-15125	6569
SMc00058	D	SMa0097_m1	D	-287	-267	TTAATGCAGTAAATGCAAAGT	9.2	8.6e-06	-11664	5066
SMa0097	R	SMa0097_m1	R	-82	-62	GGTATGTCGTTTCTGCATGGG	16.4	2.8e-09	-19694	8553
SMa0101	D	SMa0097_m1	D	-125	-105	GGTATGTCGTTTCTGCATGGG	16.4	2.8e-09	-19694	8553
SMc03062	D	SMa0097_m2	D	-171	-142	CCTATCCGATTAAAGGACAAAAGCATGCAG	8.5	2.5e-06	-12899	5602
SMc00896	D	SMa0097_m2	D	-70	-41	CGTATCCGATTAAAGGACAAAAACATGCAG	6.9	7.1e-06	-11855	5149
SMc00105	R	SMa0097_m2	R	-99	-70	GCCATGACATTTTTTGATGTACCCATTCAC	8.0	3.4e-06	-12592	5469
SMc01316	D	SMa0097_m2	D	-102	-73	CCGATGCGGTTTTAGCTGTTTATGGGGCAG	6.6	7.9e-06	-11749	5102
SMc01885	D	SMa0097_m2	D	-192	-163	CAAATGCGCGTCCTGCACCACCCGAGGTAC	9.0	2.0e-06	-13122	5699
SM_b20859	D	SMa0097_m2	D	-379	-350	CCTATCCGATTAAAGGGCAAAAACATGCAG	7.0	6.3e-06	-11975	5201
SMc00720	R	SMa0097_m3	R	-113	-101	CGATACGTCATCC	9.7	9.3e-06	-11585	5032
SMa0097	R	SMa0097_m4	R	-81	-62	GGTATGTCGTTTCTGCATGG	18.8	9.6e-12	-25369	11018
SMa0101	D	SMa0097_m4	D	-125	-106	GGTATGTCGTTTCTGCATGG	18.8	9.6e-12	-25369	11018
SM_b21180	R	SMa0097_m4	R	-38	-19	AAAATGTACTTTATGCATAT	11.3	1.6e-06	-13346	5796
SM_b21181	D	SMa0097_m4	D	-173	-154	AAAATGTACTTTATGCATAT	11.3	1.6e-06	-13346	5796
SMc04134	D	SMa0097_m5	D	-147	-118	ACAAATAACTATTTGGTTACAAGTTATGGA	9.5	2.0e-06	-13122	5699
SMc03062	D	SMa0097_m5	D	-172	-143	TCCTATCCGATTAAAGGACAAAAGCATGCA	9.3	2.2e-06	-13027	5658
SMc01885	D	SMa0097_m5	D	-193	-164	GCAAATGCGCGTCCTGCACCACCCGAGGTA	9.5	2.1e-06	-13074	5678
SMc02976	R	SMa0097_m5	R	-100	-71	TCAAATAACGATTTTACGACAAACCACGCC	7.3	8.2e-06	-11711	5086
SM_b20859	D	SMa0097_m5	D	-380	-351	TCCTATCCGATTAAAGGGCAAAAACATGCA	8.5	3.8e-06	-12481	5420
SMc01563	R	SMa0114_m1	R	-270	-260	CCCGTCAAGCG	10.1	4.1e-06	-12405	5387
SMc03172	D	SMa0114_m1	D	-24	-14	CACGTCAAGAC	9.8	6.6e-06	-11928	5180
SMc01152	D	SMa0114_m2	D	-34	-7	GAGTCCATGTCAGTTTTCGAAGAGAGGC	11.4	1.4e-06	-13479	5854
SMa0114	D	SMa0114_m3	D	-23	-4	ATGCTTTTACGGGCTTGACG	16.0	1.2e-09	-20541	8921
SMc03846	R	SMa0114_m4	R	-92	-77	GGATGCGGGTACGGTC	10.0	6.0e-06	-12024	5222
SMa0114	D	SMa0114_m4	D	-25	-10	CAATGCTTTTACGGGC	12.6	2.5e-07	-15202	6602
SMa0179	R	SMa0179_m1	R	-77	-67	AGTGATGAAGG	11.1	5.7e-06	-12075	5244
SM_b20509	D	SMa0179_m1	D	-111	-101	TATGATGAATG	11.2	4.6e-06	-12289	5337
SMc00485	R	SMa0179_m2	R	-79	-67	TCTGAACCCATTT	9.6	4.5e-06	-12311	5347
SMa0179	R	SMa0179_m2	R	-15	-3	GCTGAATCCATTT	15.8	5.8e-08	-16663	7237
SM_b20946	R	SMa0179_m2	R	-18	-6	GGTGACTCCATTT	8.5	9.2e-06	-11596	5036
SMa0179	R	SMa0179_m3	R	-19	-9	TCCATTTCATC	13.1	4.1e-07	-14707	6387
SM_b20129	D	SMa0179_m3	D	-179	-169	TTCATTTCAGC	9.8	9.1e-06	-11607	5041
SMa0179	R	SMa0179_m4	R	-104	-89	CAAATCTAACTCATTA	17.3	1.5e-09	-20318	8824
SMa0179	R	SMa0179_m4	R	-20	-5	TGAATCCATTTCATCT	14.0	1.5e-07	-15713	6824
SMc03004	D	SMa0179_m5	D	-240	-222	ACCATAAACATGGTCCAAC	8.5	3.5e-06	-12563	5456
SMc03131	R	SMa0179_m5	R	-34	-16	TCGATAAGCCAGCCCTACA	8.3	3.9e-06	-12455	5409
SMa0179	R	SMa0179_m5	R	-98	-80	ACGATACACCAAATCTAAC	18.6	1.1e-09	-20628	8959
SMa0179	R	SMa0179_m5	R	-67	-49	TTAATAATAATGGGCTACA	18.9	5.9e-10	-21251	9229
SMc04169	D	SMa0190_m1	D	-264	-255	TCATACACTC	10.7	5.1e-06	-12186	5292
SMc02737	D	SMa0190_m1	D	-92	-83	CAATACACTT	11.6	2.7e-06	-12822	5569
SMc03150	R	SMa0190_m1	R	-32	-23	TAATACACTT	12.4	4.7e-07	-14571	6328
SMa0190	D	SMa0190_m1	D	-63	-54	TTATACACTT	13.0	3.2e-07	-14955	6495
SMc00059	D	SMa0190_m2	D	-63	-50	CCGGAAATGCCTCG	9.5	3.8e-06	-12481	5420
SMc04169	D	SMa0190_m2	D	-59	-46	CCTGAAGTGCGTCG	10.8	1.7e-06	-13285	5770
SMc00683	R	SMa0190_m2	R	-82	-69	CCGGAGTTGCCTCG	8.6	6.9e-06	-11884	5161
SMc03927	D	SMa0190_m2	D	-144	-131	CCGGAAGTGCCCAG	10.7	1.7e-06	-13285	5770
SMa0190	D	SMa0190_m2	D	-50	-37	CTGGAAGTGCCTAG	17.2	3.6e-09	-19442	8444
SMc01104	R	SMa0190_m3	R	-340	-328	AACCGCTACACAC	12.1	8.4e-07	-13990	6076
SMc00017	D	SMa0190_m3	D	-79	-67	AACCGTTACACAC	11.0	2.8e-06	-12786	5553
SMc02030	R	SMa0190_m3	R	-213	-201	TACCGCCCCACAC	10.5	4.6e-06	-12289	5337
SMa0190	D	SMa0190_m4	D	-70	-54	AAAGCCGTTATACACTT	18.3	1.4e-11	-24992	10854
SMc01104	R	SMa0190_m5	R	-329	-308	CTAGGCACTTCCGGACGGAAAA	12.7	3.1e-07	-14987	6509
SMc00017	D	SMa0190_m5	D	-98	-77	CAACGCACTTCCGGACGGAAAC	17.8	1.2e-09	-20541	8921
SMc01215	R	SMa0190_m5	R	-204	-183	CTACGGTTCTCCGATAGAAACA	7.8	7.7e-06	-11774	5114
SMc02483	R	SMa0190_m5	R	-68	-47	TTACGCGCTCCCGGACGGAAAA	12.4	3.8e-07	-14783	6420
SMa0190	D	SMa0190_m5	D	-88	-67	CGACGCACTTCCGGACGGAAAG	17.8	1.2e-09	-20541	8921
SM_b20448	D	SMa0190_m5	D	-31	-10	TGACGTTTTTGCGTAAGGGAGG	7.3	9.5e-06	-11564	5022
SM_b20705	D	SMa0190_m5	D	-292	-271	CAGCGGTTTTCCGTCCGGAATT	10.5	1.4e-06	-13479	5854
SMc02172	R	SMa0222_m2	R	-33	-21	TGGTACCGTACGG	10.4	2.6e-06	-12860	5585
SMc04348	R	SMa0222_m2	R	-35	-23	CCGTACGGTACGG	9.5	4.6e-06	-12289	5337
SMc04348	R	SMa0222_m2	R	-30	-18	CAGTACCGTACGG	12.2	6.8e-07	-14201	6167
SMa0222	D	SMa0222_m2	D	-16	-4	TTGTATGGTACTG	14.5	1.1e-07	-16023	6959
SM_b20039	R	SMa0222_m2	R	-30	-18	CTGTACCTTACTG	9.8	3.6e-06	-12535	5444
SMc00409	R	SMa0222_m3	R	-240	-229	CGTACGGTAGTG	8.1	7.3e-06	-11828	5137
SMa0222	D	SMa0222_m3	D	-15	-4	TGTATGGTACTG	17.8	6.9e-09	-18792	8161
SMa0222	D	SMa0222_m4	D	-21	-4	CTGAATTGTATGGTACTG	25.3	2.7e-12	-26638	11569
SMa0222	D	SMa0222_m5	D	-62	-35	GCCCCTCCCTGTTCATCCGGTTTGCCGG	31.3	8.6e-17	-36992	16066
SMc00947	D	SMa0246_m1	D	-30	-21	AAAGGGAGAA	9.7	9.1e-06	-11607	5041
SM_b20448	D	SMa0246_m1	D	-18	-9	TAAGGGAGGA	9.7	9.1e-06	-11607	5041
SMc04010	R	SMa0246_m2	R	-26	-17	GGGAGCAAAC	9.8	6.0e-06	-12024	5222
SMa0246	D	SMa0246_m2	D	-12	-3	GAGAGCAATC	11.9	2.8e-06	-12786	5553
SMc02223	R	SMa0246_m3	R	-144	-131	CAAAGTACGGCATA	10.9	1.9e-06	-13174	5721
SMc00641	R	SMa0246_m4	R	-67	-58	GGGAGAGCGA	10.2	5.3e-06	-12148	5276
SMa0246	D	SMa0246_m4	D	-14	-5	GGGAGAGCAA	12.3	9.4e-07	-13877	6027
SMc00088	R	SMa0281_m1	R	-248	-238	CTTGTGAAATC	14.4	2.8e-07	-15088	6553
SMa0281	D	SMa0281_m1	D	-39	-29	CTTGTGAAATC	14.4	2.8e-07	-15088	6553
SM_b21210	R	SMa0281_m1	R	-82	-72	CTTGTGAAGTC	10.1	3.7e-06	-12507	5432
SMc02781	R	SMa0281_m2	R	-148	-133	GTATAAGTTCTGTAGA	10.4	3.9e-07	-14757	6409
SMa0281	D	SMa0281_m2	D	-18	-3	CTATAAGTTCCGTAGC	22.4	5.9e-11	-23553	10229
SMc02781	R	SMa0281_m3	R	-146	-133	GTATAAGTTCTGTA	11.2	4.6e-07	-14592	6337
SMa0281	D	SMa0281_m3	D	-18	-5	CTATAAGTTCCGTA	20.1	8.4e-10	-20898	9076
SM_b20154	R	SMa0281_m3	R	-278	-265	TCATACGTTCCATA	6.6	8.3e-06	-11699	5081
SMc01167	D	SMa0281_m4	D	-333	-306	CTTGTGAATGCGTTGGAGCAGGAAGAAG	-3.0	3.6e-06	-12535	5444
SMc01018	R	SMa0281_m4	R	-47	-20	CCTGTCTAATTGTCGGCTAGGCCATAGC	-4.5	6.7e-06	-11913	5174
SMc02340	D	SMa0281_m4	D	-65	-38	CTTGTCAGGTCATGGGTACGACAGGCAG	-5.3	9.3e-06	-11585	5032
SMa0281	D	SMa0281_m4	D	-39	-12	CTTGTGAAATCGTTGGCAGGACTATAAG	37.3	8.9e-18	-39260	17051
SMc01167	D	SMa0281_m5	D	-335	-306	GCCTTGTGAATGCGTTGGAGCAGGAAGAAG	-4.7	7.7e-06	-11774	5114
SMc02543	D	SMa0281_m5	D	-169	-140	TCATAGTGAGCGCTTGTATAGAACTATAAG	-3.9	5.3e-06	-12148	5276
SMc01018	R	SMa0281_m5	R	-47	-18	TTCCTGTCTAATTGTCGGCTAGGCCATAGC	-2.5	3.0e-06	-12717	5523
SMc04203	D	SMa0281_m5	D	-152	-123	TTGTTGCGGCATTCTGGGCGACAGAATAAG	-2.0	2.4e-06	-12940	5620
SMa0281	D	SMa0281_m5	D	-41	-12	TTCTTGTGAAATCGTTGGCAGGACTATAAG	39.4	5.9e-19	-41974	18229
SMc00872	D	SMa0303_m1	D	-85	-61	GAAACAAGAATATTGTCCACGTAGA	1.5	3.8e-06	-12481	5420
SMc03150	R	SMa0303_m1	R	-129	-105	TTTACGGGTTTTTTACCCATGTGGA	3.7	1.4e-06	-13479	5854
SMc03124	R	SMa0303_m1	R	-300	-276	TTCACATGTGTAACACTGATGTGAC	6.0	4.6e-07	-14592	6337
SMc03123	D	SMa0303_m1	D	-110	-86	TTCACATGTGTAACACTGATGTGAC	6.0	4.6e-07	-14592	6337
SMa0303	D	SMa0303_m1	D	-36	-12	TCTACATGAGTAAAATTCATGTGGG	29.9	8.9e-15	-32353	14051
SMa2287	R	SMa0303_m1	R	-35	-11	CACGCATGAGTACATCTCATCTATC	5.9	4.6e-07	-14592	6337
SM_b21576	R	SMa0303_m1	R	-38	-14	CCTACAATAATCAAATTAATGCGTA	4.2	1.1e-06	-13720	5959
SMa0303	D	SMa0303_m2	D	-93	-82	GATTATGTCAGC	11.7	4.3e-07	-14659	6367
SMa0303	D	SMa0303_m3	D	-38	-23	CGTCTACATGAGTAAA	18.3	2.4e-10	-22150	9620
SMa2107	R	SMa0303_m3	R	-57	-42	CTTCCACAGGAAATTA	8.4	5.2e-06	-12167	5284
SM_b21102	R	SMa0303_m3	R	-26	-11	CTCCCAGATGAATATT	11.5	7.4e-07	-14117	6131
SMc03874	R	SMa0303_m4	R	-257	-245	GTGTATGAAAACT	13.1	3.5e-07	-14865	6456
SMa0303	D	SMa0303_m4	D	-82	-70	CAGTATGAAAATG	14.9	1.8e-08	-17833	7745
SMc02678	R	SMa0303_m5	R	-320	-301	GTGTCCACAGGTGGAAAACT	12.1	6.7e-07	-14216	6174
SMa0303	D	SMa0303_m5	D	-89	-70	ATGTCAGCAGTATGAAAATG	19.1	4.0e-11	-23942	10398
SMa0303	D	SMa0303_m5	D	-39	-20	ACGTCTACATGAGTAAAATT	20.1	2.3e-12	-26798	11638
SMa0307	R	SMa0307_m1	R	-60	-45	TAATCAAGGAGCAAAT	11.4	1.5e-06	-13410	5824
SMc03004	D	SMa0307_m2	D	-261	-249	TAACTTTCAAGCA	10.4	5.5e-06	-12111	5260
SMa0307	R	SMa0307_m2	R	-32	-20	GAACTTGCAAGTC	12.1	9.8e-07	-13836	6009
SMc03015	D	SMa0307_m3	D	-287	-265	GCCGGATGCCGTTAATAATCAAT	9.1	8.5e-06	-11675	5071
SMa0307	R	SMa0307_m3	R	-35	-13	TGAGGAGGAACTTGCAAGTCACT	10.5	2.8e-06	-12786	5553
SMa0307	R	SMa0307_m4	R	-39	-20	GAACTTGCAAGTCACTCCGC	23.2	1.4e-11	-24992	10854
SMa0307	R	SMa0307_m5	R	-39	-26	GCAAGTCACTCCGC	16.0	1.7e-08	-17890	7770
SM_b20899	D	SMa0307_m5	D	-100	-87	TCCAGTTCCTCCGC	8.5	9.4e-06	-11575	5027
SMc02884	R	SMa0319_m1	R	-105	-80	CCCTCTCTTTAAGGCTTGGGTGGGCG	10.0	5.2e-06	-12167	5284
SMa0815	R	SMa0319_m1	R	-99	-74	TTCTCGCCCGCTTAATATTAGGAGGT	9.3	8.7e-06	-11652	5060
SMc01136	R	SMa0319_m4	R	-275	-247	CCGCGTTGCAGACTACCCTAGCTTGCCGC	5.8	6.5e-06	-11944	5187
SMc02584	R	SMa0319_m5	R	-85	-63	CAAGTGCTGCATGTTCCATCCTT	7.6	2.3e-06	-12983	5638
SMc00655	R	SMa0319_m5	R	-353	-331	TCAGTTAACGGCATTCCCTCATG	7.9	2.0e-06	-13122	5699
SMc00654	D	SMa0319_m5	D	-224	-202	TCAGTTAACGGCATTCCCTCATG	7.9	2.0e-06	-13122	5699
SMa0319	D	SMa0319_m5	D	-317	-295	CCAGTGAAGCAGGCACGTTCATT	5.9	6.1e-06	-12007	5215
SM_b20203	D	SMa0319_m5	D	-59	-37	GGAGTTTGTAAAATTTATTCATT	5.7	6.8e-06	-11899	5167
SMc00109	R	SMa0347_m1	R	-178	-158	GGAATCGATAGGAATAATATT	12.2	5.8e-07	-14360	6237
SMc00608	R	SMa0347_m1	R	-40	-20	GCGATCAATTGTTTCGATGAA	9.7	5.0e-06	-12206	5301
SMc00609	D	SMa0347_m1	D	-71	-51	GCGATCAATTGTTTCGATGAA	9.7	5.0e-06	-12206	5301
SMc03165	R	SMa0347_m1	R	-36	-16	CAAACCCATTAGAGGAATTTT	9.8	4.3e-06	-12357	5367
SMa0347	D	SMa0347_m1	D	-37	-17	CCAATCGATTGCTGCTATGTT	19.2	5.4e-11	-23642	10268
SMc00785	D	SMa0347_m2	D	-171	-142	TAACTTAGTCAATCATATTTCTCGTATTTC	5.8	8.6e-06	-11664	5066
SMc02634	R	SMa0347_m2	R	-33	-4	GAAATTCTCCCCATTGAGACGATCGATGCG	6.2	6.8e-06	-11899	5167
SMc00652	R	SMa0347_m2	R	-170	-141	CACATTTGGTAAACCGATTGTTAAGATGAT	6.2	6.8e-06	-11899	5167
SMc00651	D	SMa0347_m2	D	-228	-199	CACATTTGGTAAACCGATTGTTAAGATGAT	6.2	6.8e-06	-11899	5167
SMc03131	R	SMa0347_m2	R	-169	-140	TGAATTAGTAAATCCTACTGACGCGGTGTC	7.7	2.8e-06	-12786	5553
SMa0347	D	SMa0347_m2	D	-46	-17	TAAATTATTCCAATCGATTGCTGCTATGTT	32.0	2.6e-18	-40491	17585
SMc00785	D	SMa0347_m3	D	-172	-143	TTAACTTAGTCAATCATATTTCTCGTATTT	5.7	3.1e-06	-12684	5509
SMc04162	R	SMa0347_m3	R	-30	-1	ATAGCTTATTATAAGCCATAACTTATCATC	4.1	7.1e-06	-11855	5149
SMa0347	D	SMa0347_m3	D	-47	-18	ATAAATTATTCCAATCGATTGCTGCTATGT	33.7	8.3e-19	-41633	18081
SMc00987	R	SMa0347_m4	R	-146	-117	GTTAAAAAAACTTTGCTGTCTCCGATGGTT	1.9	9.0e-06	-11618	5046
SMa0347	D	SMa0347_m4	D	-38	-9	TCCAATCGATTGCTGCTATGTTCTATTATT	27.6	6.5e-14	-30364	13187
SMc00785	D	SMa0347_m5	D	-66	-53	ATTGTTCCAAACTA	8.4	8.4e-06	-11687	5076
SMc01885	D	SMa0347_m5	D	-263	-250	ATAATTCCGATAGA	9.0	5.7e-06	-12075	5244
SMa0347	D	SMa0347_m5	D	-43	-30	ATTATTCCAATCGA	17.8	4.5e-09	-19219	8347
SMa0355	D	SMa0355	D	-131	-118	GACGAGCGGGCACT	12.7	2.5e-07	-15202	6602
SMc04093	R	SMa0372_m1	R	-184	-171	AGAATTGCAATTTC	12.4	6.7e-07	-14216	6174
SMa0372	R	SMa0372_m1	R	-51	-38	AATATTGCAATTAC	12.2	8.2e-07	-14014	6086
SMa0372	R	SMa0372_m1	R	-28	-15	TAAACTGCAATTCA	10.9	2.9e-06	-12751	5538
SM_b20808	R	SMa0372_m1	R	-98	-85	AGTATTGCAATTTC	12.8	4.2e-07	-14683	6377
SMc04093	R	SMa0372_m2	R	-181	-170	AAGAATTGCAAT	12.5	5.7e-07	-14378	6244
SM_b20808	R	SMa0372_m2	R	-95	-84	CAGTATTGCAAT	12.4	7.2e-07	-14144	6143
SMc04093	R	SMa0372_m3	R	-185	-170	AAGAATTGCAATTTCG	12.7	5.2e-07	-14469	6284
SMa0372	R	SMa0372_m3	R	-52	-37	GAATATTGCAATTACG	9.8	4.0e-06	-12429	5398
SMa0372	R	SMa0372_m3	R	-29	-14	ATAAACTGCAATTCAA	12.6	5.7e-07	-14378	6244
SM_b20366	D	SMa0372_m3	D	-43	-28	AAATAGTGCAATTCTG	9.2	5.9e-06	-12041	5229
SM_b20808	R	SMa0372_m3	R	-99	-84	CAGTATTGCAATTTCT	13.6	2.4e-07	-15243	6620
SMc01524	R	SMa0372_m4	R	-113	-83	GCTATTGAAACGGATCGCGCATTTCAATGAA	9.9	2.8e-06	-12786	5553
SMc02438	R	SMa0372_m4	R	-292	-262	CTCATTTAAAAACCACTTGCATAACAATATC	8.7	5.6e-06	-12093	5252
SMa0372	R	SMa0372_m4	R	-68	-38	AATATTGCAATTACGAGCGGCGATCAACGGG	14.9	5.1e-08	-16791	7292
SMa0372	R	SMa0372_m4	R	-33	-3	CTCATTGTTTCATAAACTGCAATTCAATCAA	12.9	3.8e-07	-14783	6420
SM_b20683	R	SMa0372_m4	R	-49	-19	TACATTGTTACTCTGGATCGAGTTGAACAAT	8.4	6.6e-06	-11928	5180
SMc00059	D	SMa0372_m5	D	-137	-126	TTATTCTTTCAT	10.6	4.4e-06	-12334	5357
SMc00608	R	SMa0372_m5	R	-36	-25	CAATTGTTTCGA	10.5	4.4e-06	-12334	5357
SMc00609	D	SMa0372_m5	D	-66	-55	CAATTGTTTCGA	10.5	4.4e-06	-12334	5357
SMa0372	R	SMa0372_m5	R	-15	-4	TCATTGTTTCAT	10.1	7.8e-06	-11761	5108
SM_b21650	D	SMa0402_m1	D	-20	-3	AAGGACGGATGGAACCGA	9.3	9.7e-06	-11543	5013
SMc01904	D	SMa0402_m2	D	-52	-35	TGTCCGTGATATCTTTCC	8.0	9.3e-06	-11585	5032
SMa0402	D	SMa0402_m2	D	-60	-43	GATCCGTCATGTCATTCC	18.5	6.8e-10	-21109	9167
SMc04252	R	SMa0498_m1	R	-82	-71	TAGATCGATAAA	11.1	2.6e-06	-12860	5585
SMa0498	R	SMa0498_m1	R	-28	-17	TCTATCGATAGC	12.6	3.2e-07	-14955	6495
SM_b20683	R	SMa0498_m1	R	-22	-11	CCTATCGATACA	10.1	7.1e-06	-11855	5149
SMc00785	D	SMa0498_m2	D	-178	-162	TTAAACTTAACTTAGTC	10.5	4.1e-06	-12405	5387
SM_b20129	D	SMa0498_m2	D	-251	-235	AGAAAATCGTATTATCG	11.6	1.6e-06	-13346	5796
SM_b20674	D	SMa0498_m2	D	-89	-73	TCAAATACAGTTTAGCG	11.3	2.1e-06	-13074	5678
SMc03046	D	SMa0498_m3	D	-111	-88	TCTTAATCAACTATTAAAATCCCC	8.2	6.3e-06	-11975	5201
SMc02678	R	SMa0498_m3	R	-175	-152	GTCGAATCATCATTTAAAATCAGT	12.4	3.1e-07	-14987	6509
SMc00655	R	SMa0498_m3	R	-397	-374	TTCAGATTTACGTTTTGAATCAGG	7.9	7.5e-06	-11801	5125
SMc00654	D	SMa0498_m3	D	-181	-158	TTCAGATTTACGTTTTGAATCAGG	7.9	7.5e-06	-11801	5125
SMa0498	R	SMa0498_m3	R	-60	-37	TCCTAATTAGATTTTGATCTCAAG	19.8	1.5e-10	-22620	9824
SM_b20263	D	SMa0498_m3	D	-96	-73	TACTAATTGTATTTTTAAATTGAT	14.0	8.3e-08	-16304	7081
SM_b21186	R	SMa0498_m3	R	-108	-85	TGCAAATCAAATTTGCTGATCGAG	8.6	5.1e-06	-12186	5292
SM_b21187	D	SMa0498_m3	D	-132	-109	TGCAAATCAAATTTGCTGATCGAG	8.6	5.1e-06	-12186	5292
SMc02560	R	SMa0498_m4	R	-245	-222	AAATCGATTAATATACTGAATTCA	10.4	1.1e-06	-13720	5959
SMc02562	D	SMa0498_m4	D	-124	-101	AAATCGATTAATATACTGAATTCA	10.4	1.1e-06	-13720	5959
SMc02172	R	SMa0498_m4	R	-237	-214	AATTCAATTTGATTTATTTATTGA	7.3	7.9e-06	-11749	5102
SMa0089	D	SMa0498_m4	D	-173	-150	CGATCGATATTCCAAGTTCATCCG	8.2	4.6e-06	-12289	5337
SMa0498	R	SMa0498_m4	R	-24	-1	ATTTGAATAGAATTTTTCTATCGA	7.1	9.5e-06	-11564	5022
SMc00109	R	SMa0498_m5	R	-176	-159	GAATCGATAGGAATAATA	9.7	6.5e-06	-11944	5187
SMc04162	R	SMa0498_m5	R	-43	-26	TCATCGTCCACCCCAATT	9.3	8.9e-06	-11629	5051
SMa0498	R	SMa0498_m5	R	-35	-18	CTATCGATAGCTCTAAGT	17.0	3.9e-10	-21665	9409
SMa0520	D	SMa0520_m1	D	-82	-63	TATGCAAGCCGACTTGCGTT	17.0	6.5e-10	-21154	9187
SMa0520	D	SMa0520_m1	D	-52	-33	CTTGCAATTCCGCATGCGGA	10.3	4.3e-06	-12357	5367
SMc04093	R	SMa0520_m2	R	-184	-171	AGAATTGCAATTTC	9.9	9.1e-06	-11607	5041
SMa0307	R	SMa0520_m2	R	-33	-20	GAACTTGCAAGTCA	10.0	8.2e-06	-11711	5086
SMa0372	R	SMa0520_m2	R	-51	-38	AATATTGCAATTAC	9.9	9.1e-06	-11607	5041
SMa0520	D	SMa0520_m2	D	-55	-42	CATCTTGCAATTCC	10.2	6.8e-06	-11899	5167
SM_b20808	R	SMa0520_m2	R	-98	-85	AGTATTGCAATTTC	11.0	2.4e-06	-12940	5620
SMa0520	D	SMa0520_m3	D	-82	-63	TATGCAAGCCGACTTGCGTT	17.4	5.9e-10	-21251	9229
SMa0520	D	SMa0520_m3	D	-52	-33	CTTGCAATTCCGCATGCGGA	10.4	3.2e-06	-12652	5495
SMa0520	D	SMa0520_m4	D	-83	-63	TTATGCAAGCCGACTTGCGTT	20.6	4.8e-11	-23760	10319
SMc01664	D	SMa0557_m1	D	-42	-29	ATTCGATTAGATTG	11.3	1.8e-06	-13228	5745
SMc01945	D	SMa0557_m1	D	-95	-82	TTGCGATTATATCG	9.5	7.3e-06	-11828	5137
SMc04203	D	SMa0557_m2	D	-110	-85	TTTAGCGCGTTCGTCCGGTGTCCTTT	6.5	7.2e-06	-11841	5143
SM_b21080	D	SMa0557_m2	D	-129	-104	TTTAAGGCTTATTCTCGTTTTCTATT	6.3	8.5e-06	-11675	5071
SMc03884	D	SMa0557_m3	D	-148	-138	CCTCTCATATG	10.0	7.4e-06	-11814	5131
SM_b20773	D	SMa0557_m3	D	-171	-161	TGTCTCATACG	11.0	1.2e-06	-13633	5921
SMc02560	R	SMa0557_m4	R	-248	-219	TTTAAATCGATTAATATACTGAATTCATTA	6.7	2.6e-06	-12860	5585
SMc02562	D	SMa0557_m4	D	-127	-98	TTTAAATCGATTAATATACTGAATTCATTA	6.7	2.6e-06	-12860	5585
SMa0089	D	SMa0557_m4	D	-237	-208	TAAGGCGATGGACACGGCCCACGCTCATGA	5.4	5.3e-06	-12148	5276
SM_b20203	D	SMa0557_m4	D	-38	-9	TTTGACTTCATAAGTTAAATTTCCTTACTT	4.8	7.7e-06	-11774	5114
SMc04296	R	SMa0748_m1	R	-184	-175	AGAAATATCT	10.2	9.0e-06	-11618	5046
SMc02479	R	SMa0748_m1	R	-101	-92	AAAAATATCA	10.4	5.9e-06	-12041	5229
SM_b20586	R	SMa0748_m1	R	-58	-49	ACAAATATCA	11.0	1.7e-06	-13285	5770
SMa0748	D	SMa0748_m2	D	-32	-18	TCAATTTGTAACAGC	10.4	4.3e-06	-12357	5367
SMc02378	D	SMa0748_m3	D	-253	-235	TTAAACCCATCAATTATTT	9.2	9.2e-06	-11596	5036
SMc03150	R	SMa0748_m3	R	-192	-174	GGAAAAAAAGAATTTATGT	9.4	8.1e-06	-11724	5092
SMa2215	D	SMa0748_m3	D	-142	-124	TAAAATGCCTAAAATATCG	9.5	7.6e-06	-11787	5119
SM_b21080	D	SMa0748_m3	D	-74	-56	AAAAAATGACATTTTATGT	10.8	3.0e-06	-12717	5523
SM_b21299	D	SMa0748_m3	D	-33	-15	CAAAATGCTTTCTTTATAA	10.8	3.2e-06	-12652	5495
SM_b20712	D	SMa0748_m3	D	-173	-155	TAAAATGGAATACATATTC	10.9	3.0e-06	-12717	5523
SMc00610	D	SMa0748_m4	D	-165	-138	TAAAACCATCGTGAACGATTCTAATAAA	10.7	8.1e-07	-14026	6092
SMc00947	D	SMa0748_m4	D	-284	-257	TAAGAAATGTGCATTTGCACACTATAAG	7.2	5.8e-06	-12058	5237
SMc04203	D	SMa0748_m4	D	-188	-161	AAAAACAGCCTTTAAACATGATTATCTC	6.3	9.2e-06	-11596	5036
SMc03150	R	SMa0748_m4	R	-203	-176	AAAAAAAGAATTTATGTTGGCTAATGTA	7.4	5.2e-06	-12167	5284
SMa0748	D	SMa0748_m4	D	-148	-121	CGAAACCTGAGATTGAAGAGACGATACT	9.9	1.2e-06	-13633	5921
SMa2215	D	SMa0748_m4	D	-152	-125	AAAAAACAAGTAAAATGCCTAAAATATC	9.8	1.3e-06	-13553	5886
SM_b21115	R	SMa0748_m4	R	-189	-162	CGAAATACTTTAATGCCTAAATAATATG	7.3	5.8e-06	-12058	5237
SM_b21533	D	SMa0748_m4	D	-113	-86	CAAAACATCACAAATCGCAAATTATGCA	6.9	7.1e-06	-11855	5149
SMc00947	D	SMa0748_m5	D	-88	-78	TCTACAAAAGT	9.9	8.3e-06	-11699	5081
SMc00638	R	SMa0748_m5	R	-121	-111	ACTACAAAAAT	11.3	1.0e-06	-13816	6000
SMa0815	R	SMa0815_m1	R	-27	-8	TTTGTGAAGGTACAGACAGG	13.7	3.4e-08	-17197	7469
SMc01215	R	SMa0815_m2	R	-200	-181	ACCTACGGTTCTCCGATAGA	8.3	9.6e-06	-11554	5018
SMa0815	R	SMa0815_m2	R	-196	-177	CCCTATTGAACGCCGATCTA	17.4	1.5e-09	-20318	8824
SMc03169	D	SMa0815_m3	D	-204	-193	TCGATGGAGCTT	11.6	1.5e-06	-13410	5824
SMa0815	R	SMa0815_m3	R	-200	-189	CCGATCTAGCTT	11.1	2.4e-06	-12940	5620
SMa0815	R	SMa0815_m4	R	-194	-171	TCGTCCCCCTATTGAACGCCGATC	23.6	1.7e-14	-31706	13770
SMc00575	D	SMa0815_m5	D	-200	-174	GGCGACGACTCGGGGACGCCGCCAAGG	10.7	2.6e-06	-12860	5585
SMc00576	D	SMa0849_m1	D	-55	-40	CGGAGGTGCAGAGATC	9.0	8.0e-06	-11736	5097
SMa0849	D	SMa0849_m1	D	-19	-4	CCGAGGAGAATAGATC	17.8	4.2e-10	-21591	9377
SMc01163	R	SMa0849_m2	R	-192	-174	CATGTTGCGTTGAAACATC	8.3	5.8e-06	-12058	5237
SMa0849	D	SMa0849_m2	D	-43	-25	GATGTGGCGCGGGAACATT	21.5	9.0e-12	-25434	11046
SM_b20069	D	SMa0849_m2	D	-112	-94	CCTGTGGCCCATGAACAAG	8.0	7.1e-06	-11855	5149
SMc02976	R	SMa0849_m5	R	-103	-87	CGACAAACCACGCCGAG	10.0	7.6e-06	-11787	5119
SMa0849	D	SMa0849_m5	D	-31	-15	GAACATTACCTGCCGAG	14.2	1.4e-08	-18084	7854
SMc02340	D	SMa0955_m1	D	-176	-158	AGTCTGTTATATCAGAAAG	8.3	2.3e-06	-12983	5638
SMa0955	D	SMa0955_m1	D	-91	-73	TCGTTGATGCGACAAAAAC	11.8	3.0e-07	-15019	6523
SMa0955	D	SMa0955_m1	D	-50	-32	TTTTTGTTGCATCAAAAGT	17.4	4.4e-09	-19242	8357
SMc01578	R	SMa0955_m2	R	-310	-297	TCGCCACAACAACT	11.3	2.0e-06	-13122	5699
SMa0955	D	SMa0955_m2	D	-85	-72	ATGCGACAAAAACT	13.2	2.6e-07	-15163	6585
SMa0955	D	SMa0955_m2	D	-44	-31	TTGCATCAAAAGTT	9.7	7.7e-06	-11774	5114
SM_b20387	R	SMa0955_m2	R	-26	-13	ATTCCACAAAATCT	10.4	4.4e-06	-12334	5357
SMc00174	R	SMa0955_m3	R	-116	-97	CCCTTGGTGCGACAGAAATG	4.3	8.2e-06	-11711	5086
SMa0955	D	SMa0955_m3	D	-91	-72	TCGTTGATGCGACAAAAACT	17.2	3.7e-09	-19415	8432
SMa0955	D	SMa0955_m3	D	-50	-31	TTTTTGTTGCATCAAAAGTT	20.7	1.3e-10	-22763	9886
SMc04252	R	SMa0955_m4	R	-224	-207	CATCAAAATGGGGAGAAG	10.9	3.1e-06	-12684	5509
SMc04882	R	SMa0955_m4	R	-30	-13	CATCAACATAGTCAGAAG	11.6	1.4e-06	-13479	5854
SMc04383	D	SMa0955_m4	D	-105	-88	CATCAACATAGTCAGAAG	11.6	1.4e-06	-13479	5854
SMa0955	D	SMa0955_m4	D	-25	-8	TGTCAACCGAGTGAGAGA	15.0	3.5e-09	-19471	8456
SMc01578	R	SMa0955_m5	R	-310	-289	CCTTTTTTTCGCCACAACAACT	7.0	1.6e-06	-13346	5796
SMa0955	D	SMa0955_m5	D	-93	-72	AGTCGTTGATGCGACAAAAACT	16.6	4.8e-09	-19155	8319
SMa0955	D	SMa0955_m5	D	-52	-31	TGTTTTTGTTGCATCAAAAGTT	21.3	6.9e-11	-23397	10161
SMa1067	D	SMa1067_m2	D	-81	-63	ATCACCGATGTGACTTCAT	17.5	5.9e-10	-21251	9229
SMc04220	R	SMa1067_m3	R	-37	-11	CCTCAGCCCCACGCTGCTCCCTTGAGC	9.6	5.2e-06	-12167	5284
SMc03890	R	SMa1067_m3	R	-137	-111	TTTCACGCCTCAGCGTTTTGGGTGGGA	10.6	2.3e-06	-12983	5638
SMc03891	D	SMa1067_m3	D	-164	-138	TTTCACGCCTCAGCGTTTTGGGTGGGA	10.6	2.3e-06	-12983	5638
SMa1067	D	SMa1067_m3	D	-68	-42	CTTCATTGCATATGCGGCGGCGTGAGA	17.0	2.2e-09	-19935	8658
SMa1067	D	SMa1067_m4	D	-96	-72	CCCGGATGGGCCGAAATCACCGATG	14.4	4.2e-08	-16986	7377
SMa1067	D	SMa1067_m4	D	-56	-32	TGCGGCGGCGTGAGATTGTCCGAAT	15.6	5.6e-09	-19000	8252
SMc00820	R	SMa1207_m1	R	-42	-23	TGTTTGATGAATATCATTAA	6.9	4.7e-06	-12268	5328
SMc00821	D	SMa1207_m1	D	-192	-173	TGTTTGATGAATATCATTAA	6.9	4.7e-06	-12268	5328
SMc03967	R	SMa1207_m1	R	-149	-130	ACATTGCGGAAGATCAATTT	6.0	7.2e-06	-11841	5143
SMa0748	D	SMa1207_m1	D	-332	-313	GAACTGATCTCGATCAACAT	6.3	6.2e-06	-11991	5208
SMa1207	R	SMa1207_m1	R	-74	-55	AAGTTGATCTTGGTCAAATA	13.4	1.1e-07	-16023	6959
SM_b21080	D	SMa1207_m1	D	-159	-140	ATATTAACTTATGTTAATGA	6.6	5.4e-06	-12129	5268
SMc04323	R	SMa1207_m2	R	-60	-48	ATTTAAGTCAATA	8.8	9.4e-06	-11575	5027
SM_b20758	R	SMa1207_m2	R	-108	-96	GTCTAGATCAATA	9.3	7.3e-06	-11828	5137
SM_b20759	D	SMa1207_m2	D	-31	-19	GTCTAGATCAATA	9.3	7.3e-06	-11828	5137
SMc00820	R	SMa1207_m3	R	-42	-22	TTGTTTGATGAATATCATTAA	7.4	4.8e-06	-12247	5319
SMc00821	D	SMa1207_m3	D	-193	-173	TTGTTTGATGAATATCATTAA	7.4	4.8e-06	-12247	5319
SMa1207	R	SMa1207_m3	R	-74	-54	TAAGTTGATCTTGGTCAAATA	13.3	1.4e-07	-15782	6854
SMc00820	R	SMa1207_m4	R	-41	-23	TGTTTGATGAATATCATTA	6.1	7.4e-06	-11814	5131
SMc00821	D	SMa1207_m4	D	-192	-174	TGTTTGATGAATATCATTA	6.1	7.4e-06	-11814	5131
SMc03967	R	SMa1207_m4	R	-148	-130	ACATTGCGGAAGATCAATT	7.1	4.6e-06	-12289	5337
SMa0748	D	SMa1207_m4	D	-332	-314	GAACTGATCTCGATCAACA	5.5	9.7e-06	-11543	5013
SMa1207	R	SMa1207_m4	R	-73	-55	AAGTTGATCTTGGTCAAAT	13.0	1.7e-07	-15587	6770
SMa2379	R	SMa1207_m4	R	-74	-56	CGATTGAGCTGCATCAATT	5.5	9.7e-06	-11543	5013
SMc02942	R	SMa1207_m5	R	-32	-12	CTCCTTGAGAAGTGTCAAATT	7.6	7.1e-06	-11855	5149
SMa1207	R	SMa1207_m5	R	-74	-54	TAAGTTGATCTTGGTCAAATA	12.2	4.4e-07	-14636	6357
SMc00150	R	SMa1299_m2	R	-127	-105	AAAGGAAACGAAGCCTCCCGAAT	5.0	3.6e-06	-12535	5444
SMc00149	D	SMa1299_m2	D	-367	-345	AAAGGAAACGAAGCCTCCCGAAT	5.0	3.6e-06	-12535	5444
SMa1299	D	SMa1299_m2	D	-35	-13	ATAGGAAATGATCGTTTCCTATT	25.1	7.6e-13	-27905	12119
SMc02378	D	SMa1299_m3	D	-268	-239	ATTTAAAAAAGGGGGTTAAACCCATCAATT	4.6	2.8e-06	-12786	5553
SMc01333	D	SMa1299_m3	D	-95	-66	AAATCGAGAACATCGTCGACGAAATCAAGC	2.1	8.8e-06	-11641	5056
SMc02984	D	SMa1299_m3	D	-187	-158	AGGTAAGAAAAATCATTGTCGTAATCAAGA	4.1	3.3e-06	-12622	5481
SMc03830	R	SMa1299_m3	R	-119	-90	TCTTAGGAAAGCGAGGGGCCGAAATCAATC	9.0	2.7e-07	-15125	6569
SMa1299	D	SMa1299_m3	D	-75	-46	CGATAAGCGAGCGGGTTGACCAAATCAATT	10.9	9.9e-08	-16128	7004
SMa1299	D	SMa1299_m3	D	-37	-8	TAATAGGAAATGATCGTTTCCTATTAGGCC	9.1	2.6e-07	-15163	6585
SM_b20758	R	SMa1299_m3	R	-108	-79	GTATAAGATGTATAGTTGTCTAGATCAATA	5.5	1.7e-06	-13285	5770
SM_b20759	D	SMa1299_m3	D	-48	-19	GTATAAGATGTATAGTTGTCTAGATCAATA	5.5	1.7e-06	-13285	5770
SMc01756	D	SMa1299_m4	D	-214	-192	TTTGTGACCACTCGTGTCCAAAT	2.0	2.9e-06	-12751	5538
SMc00150	R	SMa1299_m4	R	-127	-105	AAAGGAAACGAAGCCTCCCGAAT	-0.7	8.9e-06	-11629	5051
SMc00149	D	SMa1299_m4	D	-367	-345	AAAGGAAACGAAGCCTCCCGAAT	-0.7	8.9e-06	-11629	5051
SMa1299	D	SMa1299_m4	D	-35	-13	ATAGGAAATGATCGTTTCCTATT	26.0	6.8e-13	-28017	12167
SMc01756	D	SMa1299_m5	D	-215	-193	ATTTGTGACCACTCGTGTCCAAA	0.9	2.9e-06	-12751	5538
SMc03846	R	SMa1299_m5	R	-101	-79	ATGCGGGTACGGTCATTTCCGCT	-1.3	7.2e-06	-11841	5143
SMa1299	D	SMa1299_m5	D	-36	-14	AATAGGAAATGATCGTTTCCTAT	26.8	2.9e-13	-28869	12538
SMc02396	D	SMa1387_m1	D	-279	-268	CCCGTCGCTAAA	9.0	8.5e-06	-11675	5071
SMc02429	R	SMa1387_m1	R	-92	-81	CCCGTCCATAAA	9.0	7.9e-06	-11749	5102
SMa1387	D	SMa1387_m1	D	-106	-95	CGCGTCGATAAA	15.3	7.7e-08	-16379	7114
SMc00943	R	SMa1387_m2	R	-75	-45	GGCCGGCAGGATTTATCAAAACGCATACCAC	4.1	1.3e-06	-13553	5886
SMc00944	D	SMa1387_m2	D	-121	-91	GGCCGGCAGGATTTATCAAAACGCATACCAC	4.1	1.3e-06	-13553	5886
SMc04348	R	SMa1387_m2	R	-129	-99	TAAGGGCAGCCCTGCTCTAAAACCGAGCAAC	1.9	4.0e-06	-12429	5398
SMa1387	D	SMa1387_m2	D	-90	-60	CAAGGGCACGAGTTATGAAAAAACTTACAAC	39.4	3.9e-20	-44691	19409
SMa1387	D	SMa1387_m3	D	-269	-252	CAGCCGAACTGGCGTACC	10.5	3.1e-06	-12684	5509
SMa1387	D	SMa1387_m4	D	-107	-97	CCGCGTCGATA	12.0	6.8e-07	-14201	6167
SM_b21559	R	SMa1387_m4	R	-211	-201	CCGCGTCGAGA	11.2	1.6e-06	-13346	5796
SMc00485	R	SMa1387_m5	R	-21	-8	TTCCTTTCAAGGTG	9.8	5.2e-06	-12167	5284
SMa1387	D	SMa1387_m5	D	-154	-141	CGCCTTGCAAGGAG	15.0	4.4e-08	-16939	7357
SMa1442	R	SMa1442_m1	R	-32	-14	AAAATCATCATATGACTAC	16.9	5.0e-09	-19114	8301
SMa1442	R	SMa1442_m2	R	-32	-14	AAAATCATCATATGACTAC	17.4	2.8e-09	-19694	8553
SMa1442	R	SMa1442_m4	R	-62	-47	GCAGACATCTTATGGG	18.9	4.4e-10	-21544	9357
SM_b21080	D	SMa1442_m4	D	-70	-55	AATGACATTTTATGTA	7.1	9.5e-06	-11564	5022
SM_b21117	R	SMa1442_m4	R	-39	-24	CGAGTCAGCTTATGGC	7.7	6.6e-06	-11928	5180
SMc01908	R	SMa1442_m5	R	-23	-7	TTATGAGTTATTATGAG	14.1	5.5e-08	-16716	7260
SMc01909	D	SMa1442_m5	D	-252	-236	TTATGAGTTATTATGAG	14.1	5.5e-08	-16716	7260
SM_b21080	D	SMa1442_m5	D	-71	-55	AAATGACATTTTATGTA	12.9	2.8e-07	-15088	6553
SMc02581	D	SMa1454_m1	D	-38	-29	TATTGCAATA	11.2	6.1e-07	-14310	6215
SMc02425	R	SMa1454_m1	R	-80	-71	GCTTGCAATA	9.8	9.5e-06	-11564	5022
SM_b20069	D	SMa1454_m1	D	-90	-81	GCTTGCAATA	9.8	9.5e-06	-11564	5022
SMc00333	D	SMa1454_m2	D	-17	-8	CAGAGGAAAA	10.8	1.2e-06	-13633	5921
SMc01235	R	SMa1454_m2	R	-127	-118	TAGAGGAATA	9.9	9.1e-06	-11607	5041
SMa1454	D	SMa1454_m2	D	-88	-79	CAGAGGAAAA	10.8	1.2e-06	-13633	5921
SM_b20586	R	SMa1454_m2	R	-130	-121	CGGAGGAAAA	10.3	4.3e-06	-12357	5367
SMa1454	D	SMa1454_m3	D	-68	-59	CAATGACCGA	11.9	1.7e-06	-13285	5770
SMc02581	D	SMa1454_m4	D	-37	-16	ATTGCAATAGTAATACTGAATT	9.3	9.0e-06	-11618	5046
SMc03878	R	SMa1454_m4	R	-96	-75	TGTGCATCATCTGATCCGAAAC	10.4	3.6e-06	-12535	5444
SMa0097	R	SMa1454_m4	R	-94	-73	TCTGCATGGGTTGGTGCCAAAA	10.3	4.3e-06	-12357	5367
SMa0101	D	SMa1454_m4	D	-114	-93	TCTGCATGGGTTGGTGCCAAAA	10.3	4.3e-06	-12357	5367
SMa1454	D	SMa1454_m4	D	-35	-14	TTTGCAATGTTCAATGAGAAGG	13.6	1.3e-07	-15856	6886
SMc02753	R	SMa1454_m5	R	-21	-11	TTGCTCCAACT	9.8	6.8e-06	-11899	5167
SMc00878	D	SMa1454_m5	D	-42	-32	ATGCTCCAGCT	9.9	5.4e-06	-12129	5268
SMa5007	R	SMa1454_m5	R	-214	-204	TTGCTCCAACT	9.8	6.8e-06	-11899	5167
SMc01719	D	SMa1480_m1	D	-273	-259	TTGCATGATGCAAGA	11.9	1.0e-06	-13816	6000
SMc01852	D	SMa1480_m1	D	-298	-284	TGGCGATTTGCAAGC	10.1	7.6e-06	-11787	5119
SMa1480	D	SMa1480_m1	D	-94	-80	CGGCAATGCCCAAAA	10.9	3.5e-06	-12563	5456
SMa1480	D	SMa1480_m1	D	-59	-45	TTGCGTCTTGCAAGT	10.8	4.0e-06	-12429	5398
SMc03004	D	SMa1480_m2	D	-351	-331	GTGGCTGCGTTCAAAGAAAAC	8.4	9.0e-06	-11618	5046
SMc03862	R	SMa1480_m2	R	-145	-125	GAGGCGGGCGTGCGACAAAAT	8.6	8.0e-06	-11736	5097
SMa5007	R	SMa1480_m2	R	-300	-280	TCGGCAAGCTACTCCAAAAAT	8.8	7.6e-06	-11787	5119
SMa1480	D	SMa1480_m2	D	-98	-78	TCGGCGGCAATGCCCAAAAAA	14.3	9.6e-08	-16159	7018
SMa1480	D	SMa1480_m2	D	-95	-75	GCGGCAATGCCCAAAAAAAAC	16.1	1.0e-08	-18421	8000
SMa1480	D	SMa1480_m2	D	-33	-13	CAGGCTAGCGTCGCACAAAAG	15.8	1.8e-08	-17833	7745
SMc01719	D	SMa1480_m3	D	-274	-260	TTTGCATGATGCAAG	10.5	2.5e-06	-12899	5602
SMa1480	D	SMa1480_m3	D	-60	-46	CTTGCGTCTTGCAAG	15.7	6.7e-08	-16519	7174
SMc01578	R	SMa1480_m4	R	-106	-96	GGTCTTGCAAG	12.0	2.0e-06	-13122	5699
SMa0307	R	SMa1480_m4	R	-30	-20	GAACTTGCAAG	9.9	5.6e-06	-12093	5252
SMa1480	D	SMa1480_m4	D	-56	-46	CGTCTTGCAAG	11.9	3.4e-06	-12592	5469
SMa1587	D	SMa1480_m5	D	-129	-120	GGCCATAGCT	10.9	3.8e-06	-12481	5420
SMc02818	D	SMa1602_m1	D	-155	-134	ATAGCCCCATATACGGGAAAAT	9.2	1.4e-06	-13479	5854
SMc04010	R	SMa1602_m1	R	-215	-194	AGCATGGCAATTATGCCACAGT	7.8	3.3e-06	-12622	5481
SMc03140	R	SMa1602_m1	R	-28	-7	TCTCTCCCAATGACGGCAAAAT	7.3	4.1e-06	-12405	5387
SMc03873	R	SMa1602_m1	R	-136	-115	AGGGCGCCCTAGATGGAAGAAT	6.4	6.6e-06	-11928	5180
SMa1602	R	SMa1602_m1	R	-27	-6	ACTGCGCCATAGATGGAAAACT	20.9	6.4e-11	-23472	10194
SMc02818	D	SMa1602_m2	D	-155	-134	ATAGCCCCATATACGGGAAAAT	9.8	6.2e-07	-14294	6208
SMc03873	R	SMa1602_m2	R	-136	-115	AGGGCGCCCTAGATGGAAGAAT	9.8	6.2e-07	-14294	6208
SMa1602	R	SMa1602_m2	R	-27	-6	ACTGCGCCATAGATGGAAAACT	22.3	2.1e-11	-24586	10678
SMc00017	D	SMa1602_m3	D	-153	-144	AGCTAGAGCA	10.0	8.2e-06	-11711	5086
SMc00488	D	SMa1602_m3	D	-189	-180	ATCTAGAGCC	10.9	3.9e-06	-12455	5409
SMa1698	R	SMa1602_m3	R	-116	-107	ACCTAGAGCC	10.0	8.6e-06	-11664	5066
SMa1948	D	SMa1602_m3	D	-91	-82	TGCTAGAGTC	11.9	9.2e-07	-13899	6036
SMc00023	D	SMa1602_m4	D	-49	-30	TCGAAATCACGCTTCAATTT	10.4	2.8e-06	-12786	5553
SMa1602	R	SMa1602_m4	R	-38	-19	TGGAAAACTGATTTCAACTT	16.2	7.3e-09	-18735	8137
SM_b20896	D	SMa1602_m4	D	-197	-178	TGGGAAACTGGAATCAATTG	10.5	2.6e-06	-12860	5585
SMc02818	D	SMa1602_m5	D	-155	-134	ATAGCCCCATATACGGGAAAAT	10.8	3.5e-07	-14865	6456
SMc03873	R	SMa1602_m5	R	-136	-115	AGGGCGCCCTAGATGGAAGAAT	9.7	7.0e-07	-14172	6155
SMa1602	R	SMa1602_m5	R	-27	-6	ACTGCGCCATAGATGGAAAACT	25.3	9.2e-14	-30017	13036
SMc04296	R	SMa1705_m2	R	-184	-174	AAGAAATATCT	9.7	8.1e-06	-11724	5092
SMa0748	D	SMa1705_m2	D	-62	-52	CCGAAATATCT	10.6	1.2e-06	-13633	5921
SMa1705	D	SMa1705_m2	D	-62	-52	CCGAAATATCT	10.6	1.2e-06	-13633	5921
SMa0748	D	SMa1705_m3	D	-59	-48	AAATATCTGCAG	11.3	4.8e-07	-14549	6319
SMa1705	D	SMa1705_m3	D	-59	-48	AAATATCTGCAC	12.2	4.3e-08	-16962	7367
SMc00576	D	SMa1705_m4	D	-219	-197	TGGTATAACGACGTGCACGAAAG	11.2	1.7e-06	-13285	5770
SMc03178	D	SMa1705_m4	D	-115	-93	AGCTATTTCAGGAACCCCGAATG	10.0	5.3e-06	-12148	5276
SM_b20896	D	SMa1705_m4	D	-133	-111	TGATATACCACTCTAAAAGAGTG	9.4	8.9e-06	-11629	5051
SMc02340	D	SMa1705_m5	D	-38	-9	GAGTTACCCGCCACGGTACGAAAGGCAGAG	9.6	8.1e-06	-11724	5092
SMc02396	D	SMa1720_m1	D	-101	-76	GATCGTCCGACTTCTTGAACGTTGGG	4.7	9.6e-06	-11554	5018
SMc04260	D	SMa1720_m1	D	-82	-57	TTTCGTATATAAGGCGGGGCGACGCG	6.7	3.3e-06	-12622	5481
SMc01570	R	SMa1720_m1	R	-35	-10	CATCATCCACAAACATGGACGATAGG	5.5	6.1e-06	-12007	5215
SMc00683	R	SMa1720_m1	R	-108	-83	TATCGTCCCGCTATTTAGCCTATATG	5.3	6.7e-06	-11913	5174
SMa1720	D	SMa1720_m1	D	-80	-55	TTACGTTTGAACAACTGGCCGAACCA	19.3	4.7e-10	-21478	9328
SMa1720	D	SMa1720_m1	D	-38	-13	TGTCGTCCAACATGTTGTACGAAATG	25.8	4.6e-14	-30710	13337
SMc04260	D	SMa1720_m2	D	-84	-57	TATTTCGTATATAAGGCGGGGCGACGCG	5.7	2.7e-06	-12822	5569
SMc00683	R	SMa1720_m2	R	-108	-81	CGTATCGTCCCGCTATTTAGCCTATATG	4.5	4.9e-06	-12226	5310
SMa1720	D	SMa1720_m2	D	-82	-55	GTTTACGTTTGAACAACTGGCCGAACCA	20.8	1.0e-10	-23026	10000
SMa1720	D	SMa1720_m2	D	-40	-13	CGTGTCGTCCAACATGTTGTACGAAATG	27.2	1.8e-14	-31648	13745
SMc03140	R	SMa1720_m3	R	-174	-163	TGTCTTACAACA	10.0	3.3e-06	-12622	5481
SMc02463	R	SMa1720_m3	R	-38	-27	TTTCGTCCAAAA	12.3	6.1e-07	-14310	6215
SMa1720	D	SMa1720_m3	D	-38	-27	TGTCGTCCAACA	14.6	1.7e-07	-15587	6770
SMa1720	D	SMa1720_m4	D	-60	-40	GAACCAGGCCTATTATCGAAC	13.0	2.8e-07	-15088	6553
SMa1720	D	SMa1720_m4	D	-35	-15	CGTCCAACATGTTGTACGAAA	17.7	1.1e-09	-20628	8959
SMc01588	R	SMa1720_m5	R	-76	-49	CCTCCCCACAAGGGAGGGGCTAGTCGAG	2.8	3.8e-06	-12481	5420
SMa1720	D	SMa1720_m5	D	-113	-86	CCTCCCTCGTCAGAAAGGAGTATTCCAG	33.2	3.4e-18	-40223	17469
SMa1720	D	SMa1720_m5	D	-56	-29	CAGGCCTATTATCGAACGTGTCGTCCAA	13.5	1.1e-08	-18325	7959
SM_b20426	D	SMa1720_m5	D	-36	-9	CCGCGCCATACAGGAGGGGAGACTCCAA	0.8	9.7e-06	-11543	5013
SMc01819	R	SMa1726_m1	R	-155	-137	GTTTACCAACCGGTCAAAT	9.7	1.9e-06	-13174	5721
SMa1726	R	SMa1726_m1	R	-88	-70	GCAGACCAGTGGGTAAGAA	7.2	8.4e-06	-11687	5076
SMa1726	R	SMa1726_m1	R	-68	-50	GTTGACCAGTTGGTCAGTA	19.6	2.0e-10	-22333	9699
SMa1726	R	SMa1726_m2	R	-69	-56	CAGTTGGTCAGTAT	13.5	1.4e-07	-15782	6854
SMc01534	D	SMa1726_m3	D	-71	-52	GTTTGACCAGCGGGTAAAGA	6.5	7.8e-06	-11761	5108
SMc01819	R	SMa1726_m3	R	-155	-136	TGTTTACCAACCGGTCAAAT	12.4	2.3e-07	-15285	6638
SMa1726	R	SMa1726_m3	R	-88	-69	TGCAGACCAGTGGGTAAGAA	9.9	1.1e-06	-13720	5959
SMa1726	R	SMa1726_m3	R	-68	-49	TGTTGACCAGTTGGTCAGTA	21.2	3.2e-11	-24165	10495
SMc01819	R	SMa1726_m4	R	-156	-135	ATGTTTACCAACCGGTCAAATT	11.2	5.6e-07	-14395	6252
SMa1726	R	SMa1726_m4	R	-89	-68	ATGCAGACCAGTGGGTAAGAAT	8.8	2.6e-06	-12860	5585
SMa1726	R	SMa1726_m4	R	-69	-48	GTGTTGACCAGTTGGTCAGTAT	21.3	2.4e-11	-24453	10620
SMc00241	R	SMa1726_m5	R	-68	-52	ACGATCAACACTAGATC	8.2	6.1e-06	-12007	5215
SMc04032	R	SMa1726_m5	R	-100	-84	GTGCTCAATTATTGAGC	7.9	7.1e-06	-11855	5149
SMa1726	R	SMa1726_m5	R	-56	-40	GAGTTCAAGTGTTGACC	16.1	2.0e-08	-17728	7699
SMc03046	D	SMa1736_m1	D	-110	-89	CTTAATCAACTATTAAAATCCC	12.7	3.8e-07	-14783	6420
SMc01945	D	SMa1736_m1	D	-171	-150	CGCTAACGCAATTTTATATCGA	9.6	3.1e-06	-12684	5509
SMa1736	R	SMa1736_m1	R	-73	-52	ATCAAAGAAATGTTGTCATCTC	15.9	1.9e-08	-17779	7721
SMa1736	R	SMa1736_m1	R	-31	-10	CGCAAATGGCGATTAATATCTG	14.9	5.7e-08	-16680	7244
SMa1736	R	SMa1736_m3	R	-138	-121	TCAGCGTCGAGCCTGACT	19.3	4.2e-10	-21591	9377
SM_b20387	R	SMa1736_m3	R	-347	-330	TCAGCCCCGACCCGGACG	8.7	2.7e-06	-12822	5569
SMa1736	R	SMa1736_m5	R	-205	-190	GAGCTAAGGGTTGAGC	17.0	2.6e-09	-19768	8585
SMc00528	D	SMa1749_m2	D	-75	-55	AGCTGACTGGTTTAGTCAAGA	10.0	2.3e-06	-12983	5638
SMc04198	D	SMa1749_m2	D	-39	-19	ACATGATTTGTGTTCTCAACA	9.9	2.3e-06	-12983	5638
SMc04203	D	SMa1749_m2	D	-173	-153	ACATGATTATCTCAATCAACT	7.7	9.5e-06	-11564	5022
SMc03816	D	SMa1749_m2	D	-45	-25	GTATGAGGATATTAGTAATCT	8.6	5.4e-06	-12129	5268
SMa1749	R	SMa1749_m2	R	-119	-99	AGTTGACTCGTATTCTCATTT	17.4	3.0e-09	-19625	8523
SMc01593	D	SMa1749_m4	D	-18	-4	GCAATGAGGGTACCG	10.2	3.8e-06	-12481	5420
SM_b21576	R	SMa1749_m4	R	-188	-174	ACAATGAGGGTACTC	9.6	5.9e-06	-12041	5229
SMc02323	D	SMa1749_m5	D	-71	-60	AAAAACATGATT	9.8	9.4e-06	-11575	5027
SMc01610	D	SMa1749_m5	D	-73	-62	ATAAACTTGACT	10.0	7.7e-06	-11774	5114
SMc03859	D	SMa1749_m5	D	-13	-2	AGTAAATTGAAA	9.8	9.4e-06	-11575	5027
SMa1749	R	SMa1749_m5	R	-106	-95	AGTAAGTTGACT	12.4	4.0e-07	-14732	6398
SMa2215	D	SMa1749_m5	D	-200	-189	TTTAAAATGACA	10.0	7.7e-06	-11774	5114
SMc00948	D	SMa1893_m2	D	-69	-59	TCACCTATCCG	10.0	5.9e-06	-12041	5229
SMa1893	D	SMa1893_m3	D	-18	-7	CAAGCGAGACCG	12.1	6.8e-07	-14201	6167
SMc01769	D	SMa1893_m4	D	-226	-214	CTCGCCTGCCGGG	10.7	8.4e-07	-13990	6076
SMc00488	D	SMa1893_m4	D	-324	-312	CACGCTGACCGAC	9.8	6.9e-06	-11884	5161
SMc03172	D	SMa1893_m4	D	-143	-131	CACGCCTGCCGAC	10.0	4.4e-06	-12334	5357
SMa1893	D	SMa1893_m4	D	-53	-41	CTCGCTTGCCGAG	10.7	8.4e-07	-13990	6076
SMc02305	D	SMa1893_m5	D	-167	-149	GCAACCGGCGGCAGGCGGG	9.5	9.5e-06	-11564	5022
SMc01585	D	SMa1893_m5	D	-167	-149	GCAACCCACTCCGGGCGGC	10.3	4.5e-06	-12311	5347
SMa1893	D	SMa1893_m5	D	-29	-11	TCAACCCAAACCAAGCGAG	15.5	4.0e-09	-19337	8398
SMa1948	D	SMa1948_m1	D	-179	-162	GGGTCCGGAACCGTACGG	17.4	4.1e-10	-21615	9387
SMc02463	R	SMa1948_m2	R	-67	-50	TCGTCCGGTATCGCACCC	10.9	2.0e-06	-13122	5699
SMa1948	D	SMa1948_m2	D	-179	-162	GGGTCCGGAACCGTACGG	16.3	4.7e-09	-19176	8328
SMc01882	R	SMa1948_m3	R	-157	-129	GAACGAGCACACGAGACCTGGTGCTCGGT	9.3	9.8e-06	-11533	5009
SMa1067	D	SMa1948_m3	D	-237	-209	TCACGCTGTCACCAAATATAAATCTCGAT	9.9	4.2e-06	-12380	5377
SMc00409	R	SMa1948_m5	R	-236	-227	TGCGTACGGT	9.7	8.7e-06	-11652	5060
SMc02172	R	SMa1948_m5	R	-34	-25	ACCGTACGGT	13.3	4.3e-07	-14659	6367
SMc04348	R	SMa1948_m5	R	-31	-22	ACCGTACGGT	13.3	4.3e-07	-14659	6367
SMa1948	D	SMa1948_m5	D	-170	-161	ACCGTACGGT	13.3	4.3e-07	-14659	6367
SMa1698	R	SMa1954_m1	R	-137	-126	ACCGGTGAAAGC	10.3	3.5e-06	-12563	5456
SMa1954	D	SMa1954_m1	D	-62	-51	ATCGGTGAAACT	13.7	3.1e-07	-14987	6509
SMa0179	R	SMa1954_m2	R	-19	-3	GCTGAATCCATTTCATC	8.6	8.5e-06	-11675	5071
SMa1954	D	SMa1954_m2	D	-44	-28	AATGATAGGTTCTCATC	13.6	2.5e-07	-15202	6602
SMa1954	D	SMa1954_m2	D	-23	-7	ACTGAACAGGATTCAGT	14.6	7.4e-08	-16419	7131
SM_b21641	R	SMa1954_m2	R	-126	-110	ACTTAGAGCGTTTCAGT	10.2	2.9e-06	-12751	5538
SMc01327	R	SMa1954_m3	R	-43	-33	TGAAACTGATT	10.0	8.8e-06	-11641	5056
SMc03169	D	SMa1954_m3	D	-223	-213	TTGAACTGAAC	10.4	5.8e-06	-12058	5237
SMa1954	D	SMa1954_m3	D	-57	-47	TGAAACTGAGC	10.4	5.8e-06	-12058	5237
SMa1954	D	SMa1954_m3	D	-27	-17	TTAAACTGAAC	12.6	9.5e-08	-16169	7022
SMa1954	D	SMa1954_m4	D	-68	-58	TGCCACATCGG	10.7	5.6e-06	-12093	5252
SMc04115	R	SMa1954_m5	R	-222	-203	AACAGTTTGACGGACGTGCT	12.6	6.9e-08	-16489	7161
SMc03893	D	SMa1954_m5	D	-105	-86	AACAGTTGCACGGATGTGGG	8.8	6.9e-07	-14187	6161
SMa1954	D	SMa1954_m5	D	-98	-79	ACCAGTTTGGAGGATGTGCT	22.1	2.3e-11	-24496	10638
SM_b20056	D	SMa1954_m5	D	-101	-82	ATCAGTTTCCCCGAGGTCCA	4.0	9.1e-06	-11607	5041
SMc00780	R	SMa1979_m1	R	-60	-43	CTGAAATTCGGAAATTGA	10.2	3.6e-06	-12535	5444
SMc00781	D	SMa1979_m1	D	-77	-60	CTGAAATTCGGAAATTGA	10.2	3.6e-06	-12535	5444
SMc01406	R	SMa1979_m1	R	-119	-102	GCTTCATTTCAAAATGGG	9.8	4.9e-06	-12226	5310
SMa5007	R	SMa1979_m1	R	-396	-379	TCCCAATTTGGAAATTTG	12.2	7.4e-07	-14117	6131
SMa1726	R	SMa1979_m1	R	-34	-17	TCGTTATTGACAAATCGA	9.0	8.3e-06	-11699	5081
SMa1749	R	SMa1979_m1	R	-133	-116	ATTTTATTTGCAAACTGG	9.3	6.8e-06	-11899	5167
SMa1979	D	SMa1979_m1	D	-50	-33	CCGTTATTTGGAAATTGG	13.6	1.9e-07	-15476	6721
SM_b20263	D	SMa1979_m1	D	-91	-74	ATTGTATTTTTAAATTGA	8.9	8.9e-06	-11629	5051
SMc00780	R	SMa1979_m2	R	-60	-43	CTGAAATTCGGAAATTGA	11.5	9.5e-07	-13867	6022
SMc00781	D	SMa1979_m2	D	-77	-60	CTGAAATTCGGAAATTGA	11.5	9.5e-07	-13867	6022
SMa5007	R	SMa1979_m2	R	-396	-379	TCCCAATTTGGAAATTTG	10.9	1.4e-06	-13479	5854
SMa1726	R	SMa1979_m2	R	-34	-17	TCGTTATTGACAAATCGA	10.7	1.6e-06	-13346	5796
SMa1749	R	SMa1979_m2	R	-133	-116	ATTTTATTTGCAAACTGG	7.9	9.8e-06	-11533	5009
SMa1979	D	SMa1979_m2	D	-50	-33	CCGTTATTTGGAAATTGG	17.0	4.7e-09	-19176	8328
SMa1979	D	SMa1979_m3	D	-47	-28	TTATTTGGAAATTGGATGTT	15.6	9.1e-09	-18515	8041
SMa1979	D	SMa1979_m3	D	-39	-20	AAATTGGATGTTGACATGTT	10.3	3.9e-06	-12455	5409
SMa2215	D	SMa1979_m3	D	-209	-190	CTATTGCGATTTAAAATGAC	10.2	4.3e-06	-12357	5367
SMc04134	D	SMa1979_m4	D	-149	-120	CAACAAATAACTATTTGGTTACAAGTTATG	11.1	1.2e-06	-13633	5921
SM_b20129	D	SMa1979_m4	D	-46	-17	CACCCAAGTATAGATTGTTGACAATCTAAT	9.8	3.3e-06	-12622	5481
SM_b20457	R	SMa1979_m4	R	-157	-128	CTTCCAGTTTCCAGTTTATACCCCTTTATA	11.4	9.1e-07	-13910	6041
SM_b20817	R	SMa1979_m4	R	-117	-88	CATCCAAAGTCAACCTATCCTCACTTCATC	10.1	2.6e-06	-12860	5585
SM_b21079	D	SMa1979_m4	D	-153	-124	ATTGCATAGACGATAAGTCTACAACTAATT	9.5	4.1e-06	-12405	5387
SMa1979	D	SMa1979_m5	D	-78	-55	TAACTGGCAGCAGGATTGACATAA	22.1	7.6e-12	-25603	11119
SM_b21514	D	SMa1979_m5	D	-41	-18	TAAGTGATTGGCCGGTTAACATAA	6.5	7.5e-06	-11801	5125
SMc00159	D	SMa1987_m1	D	-79	-67	AGAAAATTAACGA	11.0	2.7e-06	-12822	5569
SMa1987	D	SMa1987_m1	D	-91	-79	AGAAAATTGCCAA	11.9	1.2e-06	-13633	5921
SMc00604	D	SMa1987_m2	D	-233	-204	ATTGCTATAGTATATCTTTCGTTAATATTG	7.0	1.8e-06	-13228	5745
SMc01593	D	SMa1987_m2	D	-71	-42	GCATGTGCTGCACGGTCTCCGGCATTTTTG	5.0	5.0e-06	-12206	5301
SMa0355	D	SMa1987_m2	D	-93	-64	ACATCTGATCATCTCGCTGTTGCAATTTCG	5.5	3.9e-06	-12455	5409
SMc02796	R	SMa1987_m3	R	-115	-104	AGAAGGAGATGA	11.6	1.8e-06	-13228	5745
SM_b21576	R	SMa1987_m3	R	-174	-163	TAAAGGAGATTA	12.8	7.0e-07	-14172	6155
SM_b20705	D	SMa1987_m3	D	-158	-147	CAAAGGTGATGA	9.7	8.6e-06	-11664	5066
SMc01231	D	SMa1987_m4	D	-47	-34	GGCTATAAAAAACC	11.0	9.4e-07	-13877	6027
SMc00159	D	SMa1987_m4	D	-86	-73	AAGTATAAGAAAAT	9.5	3.4e-06	-12592	5469
SMc00638	R	SMa1987_m4	R	-123	-110	AACTACAAAAATTT	7.5	8.1e-06	-11724	5092
SMa1987	D	SMa1987_m4	D	-65	-52	GACTACAAGAAATT	12.6	2.6e-07	-15163	6585
SMc00638	R	SMa2004_m1	R	-349	-339	CTCCCTGACGC	9.7	9.2e-06	-11596	5036
SMc00638	R	SMa2004_m1	R	-255	-245	CTCCCTGACGC	9.7	9.2e-06	-11596	5036
SMa2004	D	SMa2004_m1	D	-49	-39	CTCCCTGACCG	13.5	2.9e-07	-15053	6538
SMc02779	R	SMa2004_m3	R	-148	-121	CCGACGGTCGGCGCCTTTGGCCGGGCGG	5.3	9.3e-06	-11585	5032
SM_b21533	D	SMa2004_m3	D	-74	-47	CCGTCCTGCACCGCGCGCTTCATGTCCG	6.8	4.1e-06	-12405	5387
SMc02893	D	SMa2015_m1	D	-101	-83	AAGCTAGCCGCTCGACCGT	9.0	5.5e-06	-12111	5260
SMc01585	D	SMa2015_m1	D	-78	-60	GAACTGCCCCCACGCCCAT	10.2	2.2e-06	-13027	5658
SMa2015	R	SMa2015_m1	R	-284	-266	CAACTACGTCGCTGACCCT	11.5	8.0e-07	-14039	6097
SMa2015	R	SMa2015_m1	R	-143	-125	GTACTTTGACGCCGACCGC	9.8	3.0e-06	-12717	5523
SMa2015	R	SMa2015_m2	R	-274	-262	CGACCAACTACGT	11.5	6.0e-07	-14326	6222
SMa2015	R	SMa2015_m2	R	-130	-118	TTACCGCGTACTT	12.7	7.4e-08	-16419	7131
SMa2015	R	SMa2015_m3	R	-397	-375	TTCACCACCAAAAACGACAAAAT	9.2	4.4e-06	-12334	5357
SMa2015	R	SMa2015_m3	R	-313	-291	GCCACACGCGACGGCGACAAAGC	9.5	3.5e-06	-12563	5456
SMc01327	R	SMa2015_m4	R	-79	-69	TGTGGAGAAAT	11.7	5.2e-07	-14469	6284
SMc03150	R	SMa2015_m4	R	-134	-124	TGTGGAGAAAG	11.6	8.8e-07	-13943	6056
SMa2015	R	SMa2015_m4	R	-95	-85	TGTGGAGAAAC	13.2	1.5e-07	-15713	6824
SMc02175	R	SMa2027_m1	R	-25	-14	CTGCGTTCCCCT	11.5	1.9e-06	-13174	5721
SMc02174	D	SMa2027_m1	D	-226	-215	CTGCGTTCCCCT	11.5	1.9e-06	-13174	5721
SMc00120	R	SMa2027_m1	R	-151	-140	CCGCGTTCCTTA	10.0	9.1e-06	-11607	5041
SMc02408	D	SMa2027_m1	D	-216	-205	CAGCGTTCCACA	10.2	7.2e-06	-11841	5143
SMc01169	R	SMa2027_m1	R	-16	-5	TTGCGTTCCTCT	10.9	3.1e-06	-12684	5509
SMc01168	D	SMa2027_m1	D	-157	-146	TTGCGTTCCTCT	10.9	3.1e-06	-12684	5509
SMc04286	D	SMa2027_m1	D	-130	-119	CGGCGTTCCATA	10.0	9.1e-06	-11607	5041
SMa2027	R	SMa2027_m1	R	-16	-5	CGGCGTTCCTTA	12.4	6.0e-07	-14326	6222
SMc00786	D	SMa2027_m2	D	-262	-233	CAGCACAGCTTAGAGTTTATCTGCACTCCC	2.2	4.1e-06	-12405	5387
SMa2027	R	SMa2027_m2	R	-51	-22	CGACACAGCTTGCCCGACTATGGCACTACC	31.3	2.5e-16	-35925	15602
SMc02175	R	SMa2027_m3	R	-40	-14	CTGCGTTCCCCTTTACGCGTCGGGGAG	8.3	1.3e-07	-15856	6886
SMc02174	D	SMa2027_m3	D	-226	-200	CTGCGTTCCCCTTTACGCGTCGGGGAG	8.3	1.3e-07	-15856	6886
SMc04018	D	SMa2027_m3	D	-185	-159	CACTTTTCCTCATCCCGCTCTCCAGCG	-1.1	9.3e-06	-11585	5032
SMa2027	R	SMa2027_m3	R	-31	-5	CGGCGTTCCTTATTTCGCGACACAGCT	29.8	5.2e-15	-32890	14284
SMc00786	D	SMa2027_m4	D	-262	-233	CAGCACAGCTTAGAGTTTATCTGCACTCCC	2.8	2.3e-06	-12983	5638
SMa2027	R	SMa2027_m4	R	-51	-22	CGACACAGCTTGCCCGACTATGGCACTACC	31.4	3.5e-16	-35589	15456
SMc00409	R	SMa2027_m5	R	-240	-229	CGTACGGTAGTG	9.0	9.4e-06	-11575	5027
SMa2049	D	SMa2049_m2	D	-73	-62	CGTGACCAAATT	11.5	1.4e-06	-13479	5854
SMc01723	R	SMa2049_m3	R	-24	-15	ATCCTTCGGG	9.8	5.4e-06	-12129	5268
SMc00829	R	SMa2049_m4	R	-31	-22	TTCCATTCGG	10.5	2.6e-06	-12860	5585
SMc00830	D	SMa2049_m4	D	-161	-152	TTCCATTCGG	10.5	2.6e-06	-12860	5585
SMc03258	R	SMa2049_m4	R	-89	-80	CTCCATTCGG	10.4	4.5e-06	-12311	5347
SMc01327	R	SMa2107_m1	R	-90	-70	GTGGAGAAATTCTGAAAATTT	9.1	6.2e-06	-11991	5208
SMc02118	R	SMa2107_m1	R	-109	-89	GAGTACAAACTATCTCATGCT	8.6	9.1e-06	-11607	5041
SMc02117	D	SMa2107_m1	D	-253	-233	GAGTACAAACTATCTCATGCT	8.6	9.1e-06	-11607	5041
SM_b21317	D	SMa2107_m2	D	-138	-125	TCAAATCACAGTAT	10.7	2.5e-06	-12899	5602
SM_b21533	D	SMa2107_m2	D	-111	-98	AAACATCACAAATC	9.6	9.0e-06	-11618	5046
SMc02101	D	SMa2107_m5	D	-96	-80	ATTTTCCGGGAGAAATC	9.4	8.1e-06	-11724	5092
SMa2107	R	SMa2107_m5	R	-56	-40	GTCTTCCACAGGAAATT	15.5	1.5e-08	-18015	7824
SM_b20387	R	SMa2107_m5	R	-46	-30	GTCTTCTATTAGAAGAC	10.4	3.6e-06	-12535	5444
SMc02323	D	SMa2163_m2	D	-158	-142	GCCATATGATTGGCACC	11.1	1.6e-06	-13346	5796
SMc01010	D	SMa2163_m2	D	-44	-28	ACCATACCACCCGCATT	10.0	3.8e-06	-12481	5420
SMa2163	D	SMa2163_m2	D	-67	-51	GCCATACGCTCGGCATC	18.3	2.7e-10	-22033	9569
SMa2163	D	SMa2163_m3	D	-134	-115	CTCTCACGGACTATTGAACG	23.0	3.9e-12	-26270	11409
SM_b21559	R	SMa2163_m3	R	-265	-246	CTCTCTCCGAATTTTGCACG	8.2	3.6e-06	-12535	5444
SMc01357	D	SMa2163_m4	D	-189	-179	GAGGTTCACGC	9.5	8.2e-06	-11711	5086
SMc01885	D	SMa2163_m4	D	-169	-159	GAGGTACACGC	14.8	1.1e-07	-16023	6959
SMa2163	D	SMa2163_m5	D	-147	-137	TGCTGCAAGAA	11.1	7.4e-07	-14117	6131
SMc01223	D	SMa2215_m1	D	-378	-353	ATGCAAATATTGCCTTACTTTAGGTA	5.7	8.2e-06	-11711	5086
SMc00720	R	SMa2215_m1	R	-168	-143	AAACACGATAGGAGGCATTTTAATCA	7.0	3.9e-06	-12455	5409
SMa2215	D	SMa2215_m1	D	-115	-90	GTTCACATATGCACGAATATTAGGCA	20.4	1.5e-10	-22620	9824
SMc01223	D	SMa2215_m2	D	-372	-351	ATATTGCCTTACTTTAGGTATT	8.5	1.9e-06	-13174	5721
SMc00646	D	SMa2215_m2	D	-187	-166	AGATTCCGATCTTATAGGCGTT	8.5	1.9e-06	-13174	5721
SMa2215	D	SMa2215_m2	D	-109	-88	ATATGCACGAATATTAGGCATA	22.7	1.1e-11	-25233	10959
SM_b21115	R	SMa2215_m2	R	-165	-144	ATATGCCTAAATATTTTGCGAA	8.2	2.4e-06	-12940	5620
SM_b20667	R	SMa2215_m2	R	-73	-52	ATATGCGGAAATTTTTGGCAGC	7.3	4.3e-06	-12357	5367
SMc03843	R	SMa2215_m3	R	-47	-36	AACACTGATGGC	9.6	8.7e-06	-11652	5060
SMa2215	D	SMa2215_m4	D	-101	-85	GAATATTAGGCATAACC	16.3	9.5e-09	-18472	8022
SMc02818	D	SMa2215_m5	D	-158	-144	CAAATAGCCCCATAT	9.7	8.6e-06	-11664	5066
SMc01585	D	SMa2215_m5	D	-245	-231	AAAATAAACCCATCA	11.9	9.6e-07	-13856	6018
SMa2215	D	SMa2215_m5	D	-132	-118	AAAATATCGCCATCT	14.3	1.4e-08	-18084	7854
SMa0303	D	SMa2287_m1	D	-36	-12	TCTACATGAGTAAAATTCATGTGGG	18.2	1.4e-09	-20387	8854
SMa2287	R	SMa2287_m1	R	-131	-107	CCGAGCTGAGAAAGACTCAAGCATG	17.0	5.5e-09	-19019	8260
SMa2287	R	SMa2287_m1	R	-35	-11	CACGCATGAGTACATCTCATCTATC	22.2	5.7e-12	-25891	11244
SMc01104	R	SMa2287_m2	R	-292	-268	ATATTTCATGGAAACACTGAAATAC	8.5	5.4e-06	-12129	5268
SMc00655	R	SMa2287_m2	R	-368	-344	TTCCCTCATGTATCGCATGAGGAGC	11.4	7.2e-07	-14144	6143
SMc00654	D	SMa2287_m2	D	-211	-187	TTCCCTCATGTATCGCATGAGGAGC	11.4	7.2e-07	-14144	6143
SMc04000	D	SMa2287_m2	D	-132	-108	ATTTTTCATTTGTCGAAGGCGAAAT	9.3	3.0e-06	-12717	5523
SMa2287	R	SMa2287_m2	R	-46	-22	ACATCTCATCTATCGACTGAGAAAT	22.1	2.4e-12	-26756	11620
SMa0303	D	SMa2287_m3	D	-36	-12	TCTACATGAGTAAAATTCATGTGGG	18.2	1.5e-09	-20318	8824
SMa2287	R	SMa2287_m3	R	-131	-107	CCGAGCTGAGAAAGACTCAAGCATG	17.2	4.2e-09	-19288	8377
SMa2287	R	SMa2287_m3	R	-35	-11	CACGCATGAGTACATCTCATCTATC	22.1	7.4e-12	-25630	11131
SMa2287	R	SMa2287_m4	R	-30	-10	CCACGCATGAGTACATCTCAT	10.7	1.4e-06	-13479	5854
SMc00604	D	SMa2287_m5	D	-49	-38	CGCTGAGAAACA	10.0	8.5e-06	-11675	5071
SMa2287	R	SMa2287_m5	R	-121	-110	AGCTGAGAAAGA	12.3	3.4e-07	-14894	6469
SMa2287	R	SMa2287_m5	R	-47	-36	GACTGAGAAATG	12.2	3.9e-07	-14757	6409
SM_b21706	R	SMa2287_m5	R	-289	-278	AGCTGAGAAAAG	11.2	2.5e-06	-12899	5602
SMc00363	D	SMa2303_m1	D	-203	-189	GCCCCGGGAGGAGTT	12.3	8.2e-07	-14014	6086
SMc03961	D	SMa2303_m1	D	-124	-110	TCTCCGGGAGGATTT	10.6	4.2e-06	-12380	5377
SMa1442	R	SMa2303_m1	R	-252	-238	CTTCAAGGAGGAAGC	10.4	4.9e-06	-12226	5310
SMa2303	R	SMa2303_m1	R	-175	-161	TTCCAGGGAGGATTA	12.3	8.2e-07	-14014	6086
SMa2303	R	SMa2303_m1	R	-136	-122	GCCCTGGGAGGAGAC	11.8	1.4e-06	-13479	5854
SM_b20069	D	SMa2303_m1	D	-24	-10	CACCAGGGAGGAAAG	10.3	5.2e-06	-12167	5284
SMc00109	R	SMa2303_m2	R	-65	-54	CGTCGATCAAGC	10.3	6.5e-06	-11944	5187
SMa2303	R	SMa2303_m2	R	-23	-12	CGCCGATCAACC	10.1	8.0e-06	-11736	5097
SM_b20755	D	SMa2303_m3	D	-21	-9	AAAAAACGGGAGG	10.7	3.7e-06	-12507	5432
SMa2027	R	SMa2303_m4	R	-113	-101	GCGCATGTCTCCC	10.5	3.5e-06	-12563	5456
SMa2387	D	SMa2387_m1	D	-50	-34	AAAAACAGCACGGTACC	20.5	1.7e-10	-22495	9770
SMc04348	R	SMa2387_m2	R	-38	-25	GTACGGTACGGTTC	11.0	2.3e-06	-12983	5638
SMc01852	D	SMa2387_m2	D	-197	-184	GGACGCCACCGTGC	10.0	6.0e-06	-12024	5222
SMa2387	D	SMa2387_m2	D	-43	-30	GCACGGTACCGTGC	16.3	3.3e-09	-19529	8481
SMc01495	R	SMa2387_m3	R	-177	-150	AAATAAAGCATGTTACCGTTCCCTCATC	-2.6	7.7e-07	-14077	6114
SMa2387	D	SMa2387_m3	D	-50	-23	AAAAACAGCACGGTACCGTGCTGTTATC	35.4	6.0e-17	-37352	16222
SMc01769	D	SMa2387_m4	D	-168	-146	CACGGGGGTTTACCTTTGTTAAC	9.3	5.2e-06	-12167	5284
SMa2387	D	SMa2387_m4	D	-42	-20	CACGGTACCGTGCTGTTATCATT	15.2	2.6e-08	-17465	7585
SMc03038	D	SMa2387_m5	D	-94	-78	AATAACAGCTGGTTAGC	5.9	6.7e-06	-11913	5174
SMa2387	D	SMa2387_m5	D	-50	-34	AAAAACAGCACGGTACC	21.0	1.3e-10	-22763	9886
SMc04331	D	SMa5007_m1	D	-125	-110	ACGTCGCTTTCAACAA	9.6	8.2e-06	-11711	5086
SMa5007	R	SMa5007_m1	R	-73	-58	GCGTCCCGACAAACAG	14.5	2.4e-09	-19848	8620
SMc00831	R	SMa5007_m2	R	-25	-15	TTGTTTCCAAA	9.9	2.7e-06	-12822	5569
SMc01225	R	SMa5007_m2	R	-63	-53	ATGTTCCCACT	9.6	5.0e-06	-12206	5301
SMa5007	R	SMa5007_m3	R	-181	-162	ACAATATCAGCCGAGTTAAA	9.8	2.4e-06	-12940	5620
SMa5030	D	SMa5030_m1	D	-15	-4	CACTTGCAAAAA	11.0	1.9e-06	-13174	5721
SM_b20537	R	SMa5030_m1	R	-40	-29	AATTTGCAAGAG	10.4	5.9e-06	-12041	5229
SM_b21559	R	SMa5030_m1	R	-75	-64	TATTTGCAAAAT	10.2	8.9e-06	-11629	5051
SMc02392	D	SMa5030_m2	D	-395	-383	GTCCTTGAAAAGA	10.0	8.0e-06	-11736	5097
SMc01169	R	SMa5030_m2	R	-91	-79	GTCCTTGCAAAGA	10.6	5.6e-06	-12093	5252
SMc01168	D	SMa5030_m2	D	-83	-71	GTCCTTGCAAAGA	10.6	5.6e-06	-12093	5252
SMa5030	D	SMa5030_m2	D	-53	-41	TGCCTTGAAAAGC	10.2	7.3e-06	-11828	5137
SMa5030	D	SMa5030_m2	D	-16	-4	GCACTTGCAAAAA	12.8	3.9e-07	-14757	6409
SMc01588	R	SMa5030_m3	R	-46	-35	TCCCCTCCCCAA	9.9	9.5e-06	-11564	5022
SMc01945	D	SMa5030_m3	D	-22	-11	TCCCCTCCTCGG	11.8	1.1e-06	-13720	5959
SMc03150	R	SMa5030_m3	R	-90	-79	TCCCCTCCTCGG	11.8	1.1e-06	-13720	5959
SMa5030	D	SMa5030_m3	D	-82	-71	TCTCCTCCCCGG	12.8	1.9e-07	-15476	6721
SMa5030	D	SMa5030_m3	D	-63	-52	GGCCCTCCTCTG	10.7	4.2e-06	-12380	5377
SMa2215	D	SMa5030_m3	D	-255	-244	TCTCCTCCTCGC	10.2	7.2e-06	-11841	5143
SM_b21009	R	SMa5030_m3	R	-16	-5	GCCCCTCCTCGG	11.2	2.5e-06	-12899	5602
SM_b21010	D	SMa5030_m3	D	-299	-288	GCCCCTCCTCGG	11.2	2.5e-06	-12899	5602
SMc00888	D	SMa5030_m4	D	-306	-288	CGGCCGGTACCTGCAAAAA	10.5	1.4e-06	-13479	5854
SMa5030	D	SMa5030_m4	D	-22	-4	TTGCCGGCACTTGCAAAAA	19.9	3.7e-11	-24020	10432
SM_b20366	D	SMa5030_m4	D	-58	-40	TTGCACGCATTTGCAAAAT	10.7	1.2e-06	-13633	5921
SMc02678	R	SMa5030_m5	R	-312	-292	TTTTTGCCAGTGTCCACAGGT	11.5	4.5e-07	-14614	6347
SMa2049	D	SMa5030_m5	D	-114	-94	CATCTGCAATTTCCGGTGAAT	6.9	8.1e-06	-11724	5092
SM_b20366	D	SMa5030_m5	D	-139	-119	TTTTTGCAAGCGCGTGCAAAT	14.2	5.9e-08	-16646	7229
SM_b20455	R	SMa5030_m5	R	-71	-51	TATTGGCAAGCTCGGGCAAGT	7.9	4.5e-06	-12311	5347
SM_b20456	D	SMa5030_m5	D	-58	-38	TATTGGCAAGCTCGGGCAAGT	7.9	4.5e-06	-12311	5347
SM_b20537	R	SMa5030_m5	R	-49	-29	AATTTGCAAGAGCGAAAAGAG	8.4	3.4e-06	-12592	5469
SMc00896	D	SMc00058_m1	D	-63	-47	GATTAAAGGACAAAAAC	9.8	7.5e-06	-11801	5125
SMc01092	D	SMc00058_m2	D	-38	-17	ACAATTCGGTTATTGAAAATGG	10.0	5.9e-06	-12041	5229
SMc00058	D	SMc00058_m2	D	-293	-272	TCAGTGTTAATGCAGTAAATGC	13.1	2.4e-07	-15243	6620
SMc00058	D	SMc00058_m2	D	-271	-250	AAAGTGTCGTTGTGGAAAATAC	15.0	1.5e-08	-18015	7824
SMc01875	R	SMc00058_m2	R	-156	-135	CCAATTCCGATCTTGAAAATAA	9.5	8.9e-06	-11629	5051
SMa0179	R	SMc00058_m3	R	-108	-89	CAAATCTAACTCATTAAAGT	9.6	9.3e-06	-11585	5032
SM_b21079	D	SMc00058_m3	D	-39	-20	ATATTATGCAAGTTTAAAGA	10.3	4.3e-06	-12357	5367
SMc04134	D	SMc00058_m4	D	-68	-58	TAAATTATTAT	11.1	1.5e-06	-13410	5824
SM_b20946	R	SMc00058_m4	R	-272	-262	TAAAGTATTGT	10.7	2.9e-06	-12751	5538
SMa0498	R	SMc00058_m5	R	-54	-40	TAATTAGATTTTGAT	10.3	4.2e-06	-12380	5377
SM_b20129	D	SMc00058_m5	D	-42	-28	CAAGTATAGATTGTT	10.1	6.2e-06	-11991	5208
SMc00978	R	SMc00098_m1	R	-136	-116	CACGTAAAATTAGCTAGTCTG	8.1	6.6e-06	-11928	5180
SMc00098	R	SMc00098_m1	R	-58	-38	TTTGCAAAATTAATTTGCGCG	20.6	1.0e-11	-25328	11000
SMc00040	D	SMc00098_m1	D	-75	-55	TTTGCAAAATTAATTTGCGCG	20.6	1.0e-11	-25328	11000
SMc00098	R	SMc00098_m2	R	-65	-48	TAATTTGCGCGCTATTTA	15.6	1.3e-08	-18158	7886
SMc00040	D	SMc00098_m2	D	-65	-48	TAATTTGCGCGCTATTTA	15.6	1.3e-08	-18158	7886
SMc00575	D	SMc00098_m2	D	-148	-131	GTAATTGTAGGATATTCA	9.7	5.5e-06	-12111	5260
SMc02463	R	SMc00098_m2	R	-83	-66	CCGATTGTGCGCAATTCA	9.3	8.2e-06	-11711	5086
SM_b20129	D	SMc00098_m2	D	-36	-19	TAGATTGTTGACAATCTA	10.7	2.4e-06	-12940	5620
SMc00098	R	SMc00098_m3	R	-70	-48	TAATTTGCGCGCTATTTAATCTT	10.5	2.9e-06	-12751	5538
SMc00098	R	SMc00098_m3	R	-65	-43	AAAATTAATTTGCGCGCTATTTA	13.4	1.7e-07	-15587	6770
SMc00040	D	SMc00098_m3	D	-70	-48	AAAATTAATTTGCGCGCTATTTA	13.4	1.7e-07	-15587	6770
SMc00040	D	SMc00098_m3	D	-65	-43	TAATTTGCGCGCTATTTAATCTT	10.5	2.9e-06	-12751	5538
SMc01875	R	SMc00098_m3	R	-231	-209	TCATATGCGCGCAATGCAATTGA	9.6	6.3e-06	-11975	5201
SMc01569	D	SMc00098_m3	D	-207	-185	TGAATTATAAGGCATTTTATTTC	9.3	7.9e-06	-11749	5102
SMc03998	D	SMc00098_m3	D	-62	-40	GCAATTCCGCACCGCACAATTTT	10.2	3.8e-06	-12481	5420
SMc04032	R	SMc00098_m3	R	-95	-73	AAAATTTAGCCGTGCTCAATTAT	12.2	6.1e-07	-14310	6215
SMc02470	D	SMc00098_m3	D	-91	-69	CTAATTGCCCGTTATTTAATTCG	9.4	7.3e-06	-11828	5137
SM_b21299	D	SMc00098_m3	D	-33	-11	CAAAATGCTTTCTTTATAATTTG	9.6	6.3e-06	-11975	5201
SMc00780	R	SMc00098_m4	R	-38	-19	ACTTTAATTTGCGCACAACG	9.4	2.6e-06	-12860	5585
SMc00781	D	SMc00098_m4	D	-101	-82	ACTTTAATTTGCGCACAACG	9.4	2.6e-06	-12860	5585
SMc00098	R	SMc00098_m4	R	-63	-44	AAATTAATTTGCGCGCTATT	18.8	5.8e-10	-21268	9237
SMc00040	D	SMc00098_m4	D	-69	-50	AAATTAATTTGCGCGCTATT	18.8	5.8e-10	-21268	9237
SMc00490	D	SMc00098_m4	D	-37	-18	ACATGAAATGTCGCGCAATA	7.3	9.6e-06	-11554	5018
SMc01875	R	SMc00098_m4	R	-224	-205	CAATTCATATGCGCGCAATG	11.0	8.8e-07	-13943	6056
SMc01569	D	SMc00098_m4	D	-195	-176	CATTTTATTTCCATACAATT	8.8	3.9e-06	-12455	5409
SMc01945	D	SMc00098_m4	D	-146	-127	CGATTAAATCGTGTGCGATA	10.4	1.4e-06	-13479	5854
SMc00780	R	SMc00098_m5	R	-64	-54	AAATTGAATTG	10.3	8.7e-06	-11652	5060
SMc00781	D	SMc00098_m5	D	-66	-56	AAATTGAATTG	10.3	8.7e-06	-11652	5060
SMc02603	D	SMc00098_m5	D	-70	-60	CAATTTAATTG	12.8	3.5e-07	-14865	6456
SMc02463	R	SMc00098_m5	R	-153	-143	CAATTTAATCG	10.6	5.4e-06	-12129	5268
SMc03131	R	SMc00107_m1	R	-164	-151	ATCCTACTGACGCG	8.4	9.1e-06	-11607	5041
SMc00107	R	SMc00107_m2	R	-48	-21	TCACTCCTGACACGACCTTGTCAGTTGG	25.3	1.4e-12	-27295	11854
SM_b21177	R	SMc00107_m2	R	-86	-59	CGCTTCATGAAAGCGCAGTGTCAGTTTC	-3.5	3.4e-06	-12592	5469
SM_b20758	R	SMc00107_m2	R	-63	-36	TAGCAAATGTCACAAGCCTGTCATTTGC	-2.2	2.1e-06	-13074	5678
SM_b20759	D	SMc00107_m2	D	-91	-64	TAGCAAATGTCACAAGCCTGTCATTTGC	-2.2	2.1e-06	-13074	5678
SMc00107	R	SMc00107_m3	R	-50	-21	TCACTCCTGACACGACCTTGTCAGTTGGAG	24.0	3.1e-12	-26500	11509
SM_b21177	R	SMc00107_m3	R	-88	-59	CGCTTCATGAAAGCGCAGTGTCAGTTTCGT	-1.3	1.2e-06	-13633	5921
SM_b20758	R	SMc00107_m3	R	-65	-36	TAGCAAATGTCACAAGCCTGTCATTTGCGA	-1.8	1.4e-06	-13479	5854
SM_b20759	D	SMc00107_m3	D	-91	-62	TAGCAAATGTCACAAGCCTGTCATTTGCGA	-1.8	1.4e-06	-13479	5854
SMc00107	R	SMc00107_m4	R	-61	-38	TTGTCAGTTGGAGAAAGATATAAC	19.5	3.7e-10	-21718	9432
SMc00058	D	SMc00107_m4	D	-216	-193	TTGTCCGTTGCTTTGAGGTGTCGG	6.1	5.3e-06	-12148	5276
SMc01885	D	SMc00107_m4	D	-289	-266	GTGTTCGTTGAGCGGGCTTATAAA	6.2	5.1e-06	-12186	5292
SMc03140	R	SMc00107_m4	R	-178	-155	TTGTCAGTTGTCTTACAACATTGT	5.0	9.8e-06	-11533	5009
SMc01136	R	SMc00107_m5	R	-22	-9	CCTGTCAGTTTCGT	8.0	9.3e-06	-11585	5032
SMc00107	R	SMc00107_m5	R	-50	-37	CTTGTCAGTTGGAG	13.7	2.0e-07	-15425	6699
SMc03140	R	SMc00107_m5	R	-167	-154	GTTGTCAGTTGTCT	11.2	1.4e-06	-13479	5854
SMc03879	R	SMc00107_m5	R	-163	-150	ATTGTCAGTGGCGC	8.9	5.5e-06	-12111	5260
SM_b21177	R	SMc00107_m5	R	-88	-75	AGTGTCAGTTTCGT	8.0	9.3e-06	-11585	5032
SMc03046	D	SMc00109_m1	D	-81	-69	CTTCCTCTAGTTG	11.7	1.4e-06	-13479	5854
SMc00362	D	SMc00109_m2	D	-234	-212	CATGCTATTGACTCTGGAGCCGC	-0.4	5.9e-06	-12041	5229
SMc00109	R	SMc00109_m2	R	-36	-14	AATACTCTAGTCTCTAGAGCTTT	19.9	1.7e-10	-22495	9770
SMc01875	R	SMc00109_m2	R	-63	-41	GCTGCTCAAGACACAAGACGAAG	0.8	3.7e-06	-12507	5432
SM_b20537	R	SMc00109_m2	R	-116	-94	GAACCTGCAGGTGCTGGAGGAGA	2.2	2.1e-06	-13074	5678
SM_b21479	D	SMc00109_m2	D	-50	-28	AACCATCTAGCCGATAGAGGTGG	2.2	2.1e-06	-13074	5678
SMc03046	D	SMc00109_m3	D	-81	-68	CTTCCTCTAGTTGT	7.5	5.3e-06	-12148	5276
SMc00023	D	SMc00109_m3	D	-81	-68	CCCCCTCTTGTCGC	6.5	9.0e-06	-11618	5046
SMc00109	R	SMc00109_m3	R	-27	-14	AATACTCTAGTCTC	12.1	3.6e-07	-14837	6444
SMc00109	R	SMc00109_m4	R	-36	-14	AATACTCTAGTCTCTAGAGCTTT	19.0	2.6e-10	-22070	9585
SMc01875	R	SMc00109_m4	R	-63	-41	GCTGCTCAAGACACAAGACGAAG	-3.1	9.2e-06	-11596	5036
SM_b20537	R	SMc00109_m4	R	-116	-94	GAACCTGCAGGTGCTGGAGGAGA	-1.3	4.7e-06	-12268	5328
SM_b21479	D	SMc00109_m4	D	-50	-28	AACCATCTAGCCGATAGAGGTGG	2.9	9.1e-07	-13910	6041
SMc03039	D	SMc00109_m5	D	-27	-14	AACTAGCCATTCAA	9.6	9.5e-06	-11564	5022
SMc04296	R	SMc00109_m5	R	-103	-90	TTCTAGGAATTCAA	11.2	1.9e-06	-13174	5721
SMc00146	D	SMc00146_m1	D	-24	-12	CCATGAACATAAT	9.8	8.3e-06	-11699	5081
SMc04010	R	SMc00146_m1	R	-248	-236	TAGTGAACAGTTT	9.8	8.3e-06	-11699	5081
SM_b20683	R	SMc00146_m1	R	-51	-39	AGTTGAACAATAT	9.7	9.0e-06	-11618	5046
SMc00146	D	SMc00146_m2	D	-34	-13	TAATGTTCAACCATGAACATAA	20.7	1.1e-10	-22931	9959
SMc03150	R	SMc00146_m2	R	-287	-266	AATCGTTCAAGAACGAACCAAT	5.7	5.6e-06	-12093	5252
SMc03122	R	SMc00146_m2	R	-140	-119	GTCTGGTCAAATTTGAACAGAG	5.9	5.0e-06	-12206	5301
SMc03122	R	SMc00146_m2	R	-33	-12	TTCTGTTCAAAAATGAACAGAT	15.4	1.6e-08	-17951	7796
SMa1736	R	SMc00146_m2	R	-136	-115	TAATGTTCAGCGTCGAGCCTGA	5.2	7.1e-06	-11855	5149
SM_b20366	D	SMc00146_m2	D	-88	-67	GATTGTTCGATATTGCACGATA	8.6	1.2e-06	-13633	5921
SMc00146	D	SMc00146_m3	D	-35	-12	CTAATGTTCAACCATGAACATAAT	20.4	2.0e-10	-22333	9699
SMc03150	R	SMc00146_m3	R	-288	-265	AAATCGTTCAAGAACGAACCAATT	5.2	2.1e-06	-13074	5678
SMc03122	R	SMc00146_m3	R	-141	-118	TGTCTGGTCAAATTTGAACAGAGC	2.5	6.8e-06	-11899	5167
SMc03122	R	SMc00146_m3	R	-34	-11	CTTCTGTTCAAAAATGAACAGATG	12.9	4.2e-08	-16986	7377
SM_b20366	D	SMc00146_m3	D	-89	-66	AGATTGTTCGATATTGCACGATAT	8.4	4.6e-07	-14592	6337
SMc00146	D	SMc00146_m5	D	-35	-12	CTAATGTTCAACCATGAACATAAT	20.6	1.6e-10	-22556	9796
SMc03150	R	SMc00146_m5	R	-288	-265	AAATCGTTCAAGAACGAACCAATT	6.8	1.2e-06	-13633	5921
SMc03122	R	SMc00146_m5	R	-141	-118	TGTCTGGTCAAATTTGAACAGAGC	2.3	8.7e-06	-11652	5060
SMc03122	R	SMc00146_m5	R	-34	-11	CTTCTGTTCAAAAATGAACAGATG	13.1	4.1e-08	-17010	7387
SMa1736	R	SMc00146_m5	R	-137	-114	ATAATGTTCAGCGTCGAGCCTGAC	2.4	8.4e-06	-11687	5076
SM_b20366	D	SMc00146_m5	D	-89	-66	AGATTGTTCGATATTGCACGATAT	9.8	2.6e-07	-15163	6585
SMc00163	D	SMc00163_m1	D	-31	-21	ATCCATCAAAA	13.1	2.7e-07	-15125	6569
SMc00163	D	SMc00163_m1	D	-20	-10	AGCCATCAGGA	10.5	5.8e-06	-12058	5237
SMc03830	R	SMc00163_m1	R	-145	-135	ATCCATCAAAC	11.6	2.2e-06	-13027	5658
SMc00289	R	SMc00163_m2	R	-170	-159	TCACTATACGCC	13.4	2.7e-07	-15125	6569
SMc00163	D	SMc00163_m2	D	-69	-58	CGACTATACGGC	13.6	2.3e-07	-15285	6638
SMc03873	R	SMc00163_m2	R	-285	-274	CCGCTATACGCC	9.1	4.7e-06	-12268	5328
SMc04134	D	SMc00163_m3	D	-194	-182	GTTCCTCCTCCCT	10.4	7.4e-06	-11814	5131
SMc00163	D	SMc00163_m3	D	-98	-86	AGTTCTCCTCCTC	11.4	1.2e-06	-13633	5921
SMc00643	R	SMc00163_m3	R	-186	-174	AATCCTCCTCCAT	10.3	8.3e-06	-11699	5081
SM_b20020	R	SMc00163_m3	R	-17	-5	GGGTCTCCTCCAG	10.4	7.4e-06	-11814	5131
SM_b20021	D	SMc00163_m3	D	-116	-104	GGGTCTCCTCCAG	10.4	7.4e-06	-11814	5131
SM_b20203	D	SMc00163_m3	D	-102	-90	ATGTCTCCTCCAC	10.3	8.3e-06	-11699	5081
SM_b20817	R	SMc00163_m3	R	-13	-1	ATGTCTCCTCCCT	10.7	4.9e-06	-12226	5310
SM_b21706	R	SMc00163_m3	R	-237	-225	TCGCCTCCTCCCG	10.4	7.4e-06	-11814	5131
SMc02884	R	SMc00163_m4	R	-139	-125	CAAAAAAACATCCAA	9.2	2.7e-06	-12822	5569
SMc00825	R	SMc00163_m4	R	-112	-98	CAAGATGCCCTCAAA	8.9	3.4e-06	-12592	5469
SMc02101	D	SMc00163_m4	D	-170	-156	CAAAACGACATCAAG	8.1	4.9e-06	-12226	5310
SMc00163	D	SMc00163_m4	D	-36	-22	CAAGAATCCATCAAA	15.6	2.8e-08	-17391	7553
SMc00163	D	SMc00163_m4	D	-25	-11	CAAAAAGCCATCAGG	16.5	1.6e-08	-17951	7796
SMc01756	D	SMc00163_m5	D	-21	-3	GCAATTCCGGGACTATACG	9.7	2.1e-06	-13074	5678
SMc00163	D	SMc00163_m5	D	-78	-60	ACGATGATCCGACTATACG	14.5	7.7e-08	-16379	7114
SM_b20004	R	SMc00163_m5	R	-31	-13	TCGATTATTGCACCATGTG	7.9	5.9e-06	-12041	5229
SMc00182	D	SMc00182_m1	D	-36	-23	AGAACCTCAACTAT	14.5	7.9e-08	-16354	7102
SMc02984	D	SMc00182_m1	D	-250	-237	ATAACCTCACCTAA	12.0	9.2e-07	-13899	6036
SMc00380	R	SMc00182_m2	R	-114	-101	TCTTGAGGTGAAGA	9.5	3.7e-06	-12507	5432
SMc00380	R	SMc00182_m2	R	-67	-54	TCTTGACGTCAAGA	14.8	7.0e-08	-16475	7155
SMc00182	D	SMc00182_m2	D	-22	-9	AGTTGAGGTCAATA	14.4	1.5e-07	-15713	6824
SMc04323	R	SMc00182_m2	R	-60	-47	TATTTAAGTCAATA	8.1	9.4e-06	-11575	5027
SMc00380	R	SMc00182_m3	R	-81	-56	TTGACGTCAAGATACATTGGAGTAGA	-0.3	5.9e-06	-12041	5229
[truncated: 2,211 more rows]
[truncated: 45 more columns]

## Sheet: Hoja2
	//
	//
	//
	//
	//
	//
	//
	//
	//
	//
	//
	//
	//
	//
	//
	//
	//
	//
	//
	//
	//
	//
	//
	//
	//
	//
	//
	//
	//
	//
	//
	//
	//
	//
	//
	//
	//
	//
	//
	//
	//
	//
	//
	//
	//
	//
	//
	//
	//
	//
	//
	//
	//
	//
	//
	//
	//
	//
	//
	//
	//
	//
	//
	//
	//
	//
	//
	//
	//
	//
	//
	//
	//
	//
	//
	//
	//
	//
	//
	//
	//
	//
	//
	//
	//
	//
	//
	//
	//
	//
	//
	//
	//
	//
	//
	//
	//
	//
	//
	//
	//
	//
	//
	//
	//
	//
	//
	//
	//
	//
	//
	//
	//
	//
	//
	//
	//
	//
	//
	//
	//
	//
	//
	//
	//
	//
	//
	//
	//
	//
	//
	//
	//
	//
	//
	//
	//
	//
	//
	//
	//
	//
	//
	//
	//
	//
	//
	//
	//
	//
	//
	//
	//
	//
	//
	//
	//
	//
	//
	//
	//
	//
	//
	//
	//
	//
	//
	//
	//
	//
	//
	//
	//
	//
	//
	//
	//
	//
	//
	//
	//
	//
	//
	//
	//
	//
	//
	//
	//
	//
	//
	//
	//
	//
	//
	//
	//
	//
	//
	//
	//
	//
	//
	//
	//
	//
	//
	//
	//
	//
	//
	//
	//
	//
	//
	//
	//
	//
	//
	//
	//
	//
	//
	//
	//
	//
	//
	//
	//
	//
	//
	//
	//
	//
	//
	//
	//
	//
	//
	//
	//
	//
	//
	//
	//
	//
	//
	//
	//
	//
	//
	//
	//
	//
	//
	//
	//
	//
	SM_b20004	SM_b20004
	SM_b20004	SM_b21117
	SM_b20004	SM_b21372
	SM_b20004	SMc00163
	SM_b20004	SMc04203
	SM_b20020	SM_b20021
	SM_b20020	SMc00163
	SM_b20021	SM_b20021
	SM_b20021	SMc00163
	SM_b20033	SM_b20033
	SM_b20033	SM_b20162
	SM_b20033	SM_b21598
	SM_b20033	SM_b21650
	SM_b20033	SMc02172
	SM_b20033	SMc02323
	SM_b20039	SMa0222
	SM_b20039	SM_b20039
	SM_b20039	SM_b21484
	SM_b20039	SMc01768
	SM_b20039	SMc02888
	SM_b20039	SMc04348
	SM_b20048	SM_b20048
	SM_b20048	SMc04348
	SM_b20055	SM_b20055
	SM_b20055	SM_b20525
	SM_b20056	SMa1954
	SM_b20056	SMc02140
	SM_b20069	SMa0849
	SM_b20069	SMa1454
	SM_b20069	SMa2303
	SM_b20069	SM_b21008
	SM_b20069	SM_b21021
	SM_b20069	SM_b21169
	SM_b20069	SM_b21484
	SM_b20069	SM_b21598
	SM_b20069	SMc00929
	SM_b20069	SMc02140
	SM_b20069	SMc02470
	SM_b20069	SMc04315
	SM_b20072	SM_b20154
	SM_b20072	SM_b20276
	SM_b20072	SM_b20896
	SM_b20072	SM_b21158
	SM_b20072	SMc01615
	SM_b20072	SMc02425
	SM_b20106	SM_b20004
	SM_b20106	SM_b20106
	SM_b20106	SMc02184
	SM_b20123	SM_b20123
	SM_b20123	SM_b20667
	SM_b20129	SMa0179
	SM_b20129	SMa0498
	SM_b20129	SMa1979
	SM_b20129	SM_b20033
	SM_b20129	SM_b20129
	SM_b20129	SM_b20347
	SM_b20129	SM_b20392
	SM_b20129	SM_b20426
	SM_b20129	SM_b20758
	SM_b20129	SM_b20901
	SM_b20129	SM_b21080
	SM_b20129	SM_b21093
	SM_b20129	SM_b21601
	SM_b20129	SM_b21706
	SM_b20129	SMc00058
	SM_b20129	SMc00098
	SM_b20129	SMc00490
	SM_b20129	SMc00654
	SM_b20129	SMc00785
	SM_b20129	SMc01615
	SM_b20129	SMc01945
	SM_b20129	SMc02425
	SM_b20129	SMc03150
	SM_b20154	SMa0281
	SM_b20154	SM_b20154
	SM_b20154	SM_b20366
	SM_b20154	SM_b20367
	SM_b20154	SM_b20455
	SM_b20154	SM_b21102
	SM_b20154	SMc00794
	SM_b20154	SMc02851
	SM_b20162	SM_b20162
	SM_b20162	SM_b21270
	SM_b20162	SMc02172
	SM_b20162	SMc03820
	SM_b20203	SMa0319
	SM_b20203	SMa0557
	SM_b20203	SM_b20203
	SM_b20203	SM_b21208
	SM_b20203	SM_b21222
	SM_b20203	SMc00163
	SM_b20203	SMc00679
	SM_b20203	SMc02223
	SM_b20203	SMc04134
	SM_b20211	SMc02175
	SM_b20211	SMc04220
	SM_b20215	SM_b20215
	SM_b20219	SM_b20219
	SM_b20219	SMc03820
	SM_b20258	SM_b20258
	SM_b20258	SM_b20935
	SM_b20258	SMc01908
	SM_b20258	SMc02777
	SM_b20262	SM_b20258
	SM_b20262	SM_b20337
	SM_b20262	SM_b20773
	SM_b20262	SMc03258
	SM_b20263	SMa0498
	SM_b20263	SMa1979
	SM_b20263	SM_b20203
	SM_b20263	SM_b20258
	SM_b20263	SM_b20337
	SM_b20263	SM_b20457
	SM_b20263	SM_b20683
	SM_b20263	SM_b20758
	SM_b20263	SM_b20896
	SM_b20263	SM_b21346
	SM_b20263	SM_b21559
	SM_b20263	SMc01664
	SM_b20263	SMc02560
	SM_b20263	SMc02844
	SM_b20263	SMc03150
	SM_b20263	SMc03816
	SM_b20263	SMc04055
	SM_b20276	SM_b20276
	SM_b20276	SMc00820
	SM_b20276	SMc03165
	SM_b20285	SMa0063
	SM_b20285	SM_b20285
	SM_b20285	SM_b20457
	SM_b20285	SMc03998
	SM_b20285	SMc04260
	SM_b20292	SM_b20537
	SM_b20292	SM_b21484
	SM_b20292	SM_b21493
	SM_b20337	SM_b20276
	SM_b20337	SM_b20337
	SM_b20337	SM_b20457
	SM_b20337	SMc01092
	SM_b20337	SMc01908
	SM_b20337	SMc04134
	SM_b20347	SM_b20347
	SM_b20347	SM_b20392
	SM_b20347	SM_b20509
	SM_b20347	SMc03165
	SM_b20366	SMa0372
	SM_b20366	SMa5030
	SM_b20366	SM_b20366
	SM_b20366	SM_b21222
	SM_b20366	SM_b21493
	SM_b20366	SMc00146
	SM_b20366	SMc02172
	SM_b20366	SMc03122
	SM_b20367	SM_b20367
	SM_b20367	SMc01615
	SM_b20387	SMa0955
	SM_b20387	SMa1736
	SM_b20387	SMa2107
	SM_b20387	SM_b20154
	SM_b20387	SM_b20258
	SM_b20387	SM_b20387
	SM_b20387	SM_b20667
	SM_b20387	SM_b21346
	SM_b20387	SMc00785
	SM_b20387	SMc01403
	SM_b20387	SMc01593
	SM_b20387	SMc04143
	SM_b20392	SM_b20392
	SM_b20392	SMc00558
	SM_b20426	SMa1720
	SM_b20426	SM_b20426
	SM_b20426	SMc03122
	SM_b20441	SM_b20441
	SM_b20441	SMc00829
	SM_b20441	SMc01975
	SM_b20441	SMc03140
	SM_b20448	SMa0190
	SM_b20448	SMa0246
	SM_b20448	SM_b21093
	SM_b20448	SM_b21598
	SM_b20455	SMa5030
	SM_b20455	SM_b20455
	SM_b20455	SM_b20758
	SM_b20455	SMc00490
	SM_b20455	SMc01630
	SM_b20455	SMc02647
	SM_b20455	SMc04134
	SM_b20456	SMa5030
	SM_b20456	SM_b20455
	SM_b20456	SM_b20758
	SM_b20456	SMc00490
	SM_b20456	SMc01630
	SM_b20456	SMc02647
	SM_b20456	SMc04134
	SM_b20457	SMa1979
	SM_b20457	SM_b20162
	SM_b20457	SM_b20457
	SM_b20457	SMc02425
	SM_b20457	SMc03165
	SM_b20494	SM_b20494
	SM_b20509	SMa0179
	SM_b20509	SM_b20509
	SM_b20516	SM_b20516
	SM_b20523	SM_b20525
	SM_b20523	SM_b21359
	SM_b20523	SMc00458
	SM_b20523	SMc01610
	SM_b20523	SMc03258
	SM_b20525	SM_b20525
	SM_b20525	SM_b21359
	SM_b20525	SMc00458
	SM_b20525	SMc02184
	SM_b20525	SMc02893
	SM_b20531	SM_b20531
	SM_b20531	SM_b21117
	SM_b20531	SMc00646
	SM_b20531	SMc02470
	SM_b20537	SMa5030
	SM_b20537	SM_b20537
	SM_b20537	SMc00109
	SM_b20556	SM_b21021
	SM_b20556	SMc02140
	SM_b20556	SMc02523
	SM_b20582	SM_b20582
	SM_b20586	SMa0748
	SM_b20586	SMa1454
	SM_b20586	SM_b20586
	SM_b20586	SMc01223
	SM_b20586	SMc02022
	SM_b20586	SMc03816
	SM_b20667	SMa2215
	SM_b20667	SM_b20667
	SM_b20674	SMa0498
	SM_b20674	SM_b20674
	SM_b20674	SMc01495
	SM_b20674	SMc02470
	SM_b20674	SMc02596
	SM_b20674	SMc02844
	SM_b20674	SMc03998
	SM_b20683	SMa0372
	SM_b20683	SMa0498
	SM_b20683	SM_b20683
	SM_b20683	SMc00146
	SM_b20683	SMc01406
	SM_b20683	SMc02984
	SM_b20705	SMa0190
	SM_b20705	SMa1987
	SM_b20705	SM_b20537
	SM_b20705	SM_b21493
	SM_b20705	SMc01762
	SM_b20705	SMc02523
	SM_b20705	SMc04055
	SM_b20712	SMa0748
	SM_b20712	SM_b20154
	SM_b20722	SM_b20722
	SM_b20749	SM_b20896
	SM_b20749	SMc02893
	SM_b20749	SMc03890
	SM_b20755	SMa2303
	SM_b20758	SMa1207
	SM_b20758	SMa1299
	SM_b20758	SM_b20758
	SM_b20758	SMc00107
	SM_b20759	SMa1207
	SM_b20759	SMa1299
	SM_b20759	SM_b20758
	SM_b20759	SMc00107
	SM_b20773	SMa0557
	SM_b20773	SM_b20039
	SM_b20773	SM_b20773
	SM_b20773	SMc01260
	SM_b20773	SMc03123
	SM_b20773	SMc03890
	SM_b20773	SMc04260
	SM_b20806	SMc00698
	SM_b20806	SMc01495
	SM_b20808	SMa0372
	SM_b20808	SMa0520
	SM_b20808	SM_b20215
	SM_b20808	SMc00283
	SM_b20808	SMc04315
	SM_b20817	SMa1979
	SM_b20817	SM_b20674
	SM_b20817	SM_b20817
	SM_b20817	SM_b20859
	SM_b20817	SMc00163
	SM_b20817	SMc01610
	SM_b20817	SMc02223
	SM_b20817	SMc03122
	SM_b20859	SMa0097
	SM_b20859	SM_b20859
	SM_b20859	SM_b21359
	SM_b20859	SM_b21641
	SM_b20859	SMc00479
	SM_b20859	SMc01762
	SM_b20859	SMc01945
	SM_b20859	SMc02504
	SM_b20873	SM_b21359
	SM_b20875	SMc04169
	SM_b20894	SM_b20582
	SM_b20894	SMc02470
	SM_b20894	SMc02523
	SM_b20896	SMa1602
	SM_b20896	SMa1705
	SM_b20896	SM_b20509
	SM_b20896	SM_b20674
	SM_b20896	SM_b20758
	SM_b20896	SM_b20896
	SM_b20896	SMc00490
	SM_b20896	SMc01615
	SM_b20896	SMc02560
	SM_b20896	SMc02866
	SM_b20896	SMc03123
	SM_b20899	SMa0307
	SM_b20899	SM_b20154
	SM_b20899	SM_b20516
	SM_b20901	SM_b20258
	SM_b20901	SM_b20582
	SM_b20901	SM_b20901
	SM_b20901	SM_b21187
	SM_b20901	SMc00558
	SM_b20901	SMc00679
	SM_b20901	SMc02140
	SM_b20901	SMc02172
	SM_b20901	SMc02470
	SM_b20901	SMc03873
	SM_b20901	SMc04143
	SM_b20935	SM_b20935
	SM_b20935	SM_b21641
	SM_b20935	SMc01593
	SM_b20935	SMc01615
	SM_b20935	SMc02647
	SM_b20942	SM_b21372
	SM_b20942	SMc00182
	SM_b20942	SMc00275
	SM_b20942	SMc04011
	SM_b20946	SMa0179
	SM_b20946	SM_b20457
	SM_b20946	SM_b21080
	SM_b20946	SM_b21102
	SM_b20946	SM_b21372
	SM_b20946	SM_b21559
	SM_b20946	SM_b21641
	SM_b20946	SMc00058
	SM_b20946	SMc00698
	SM_b20946	SMc00794
	SM_b20946	SMc01403
	SM_b20946	SMc01406
	SM_b20946	SMc01504
	SM_b20946	SMc02596
	SM_b20946	SMc03122
	SM_b20946	SMc03998
	SM_b20999	SM_b20004
	SM_b20999	SMc00780
	SM_b21008	SM_b20509
	SM_b21008	SM_b20758
	SM_b21008	SM_b21008
	SM_b21008	SM_b21222
	SM_b21008	SM_b21533
	SM_b21008	SMc03060
	SM_b21008	SMc04134
	SM_b21009	SMa5030
	SM_b21009	SMc00490
	SM_b21009	SMc00766
	SM_b21009	SMc01762
	SM_b21009	SMc02323
	SM_b21009	SMc03820
	SM_b21009	SMc03998
	SM_b21009	SMc04109
	SM_b21010	SMa5030
	SM_b21010	SMc00490
	SM_b21010	SMc00766
	SM_b21010	SMc01762
	SM_b21010	SMc02323
	SM_b21010	SMc03820
	SM_b21010	SMc03998
	SM_b21010	SMc04109
	SM_b21021	SM_b20123
	SM_b21021	SM_b20129
	SM_b21021	SM_b20258
	SM_b21021	SM_b21021
	SM_b21021	SM_b21576
	SM_b21021	SMc00953
	SM_b21021	SMc01504
	SM_b21021	SMc01615
	SM_b21021	SMc02425
	SM_b21035	SM_b21115
	SM_b21079	SMa1979
	SM_b21079	SM_b20258
	SM_b21079	SM_b21372
	SM_b21079	SM_b21464
	SM_b21079	SMc00058
	SM_b21079	SMc02184
	SM_b21080	SMa0557
	SM_b21080	SMa0748
	SM_b21080	SMa1207
	SM_b21080	SMa1442
	SM_b21080	SM_b20203
	SM_b21080	SM_b20758
	SM_b21080	SM_b20901
	SM_b21080	SM_b21080
	SM_b21080	SM_b21336
	SM_b21080	SM_b21419
	SM_b21080	SMc00785
	SM_b21080	SMc00929
	SM_b21080	SMc01330
	SM_b21080	SMc01593
	SM_b21080	SMc01615
	SM_b21080	SMc01787
	SM_b21080	SMc01945
	SM_b21080	SMc03165
	SM_b21080	SMc04315
	SM_b21080	SMc04882
	SM_b21093	SM_b20586
	SM_b21093	SM_b20683
	SM_b21093	SM_b21093
	SM_b21093	SM_b21576
	SM_b21093	SMc03170
	SM_b21093	SMc03816
	SM_b21102	SMa0303
	SM_b21102	SM_b20129
	SM_b21102	SM_b20215
	SM_b21102	SM_b20509
	SM_b21102	SM_b20901
	SM_b21102	SM_b21102
	SM_b21102	SM_b21208
	SM_b21102	SMc00820
	SM_b21102	SMc01975
	SM_b21102	SMc02560
	SM_b21102	SMc04163
	SM_b21115	SMa0748
	SM_b21115	SMa2215
	SM_b21115	SM_b21115
	SM_b21115	SMc02323
	SM_b21115	SMc02560
	SM_b21115	SMc04264
	SM_b21117	SMa1442
	SM_b21117	SM_b20219
	SM_b21117	SM_b20537
	SM_b21117	SM_b21117
	SM_b21117	SMc02584
	SM_b21158	SM_b21158
	SM_b21169	SM_b21169
	SM_b21169	SM_b21336
	SM_b21169	SM_b21576
	SM_b21169	SMc03150
	SM_b21169	SMc04143
	SM_b21177	SM_b20367
	SM_b21177	SM_b21336
	SM_b21177	SMc00107
	SM_b21177	SMc01593
	SM_b21177	SMc03123
	SM_b21180	SMa0097
	SM_b21180	SM_b20203
	SM_b21180	SM_b21180
	SM_b21180	SMc03210
	SM_b21181	SMa0097
	SM_b21181	SM_b20203
	SM_b21181	SM_b21180
	SM_b21181	SMc03210
	SM_b21183	SMc03122
	SM_b21186	SMa0498
	SM_b21186	SM_b21187
	SM_b21186	SM_b21706
	SM_b21186	SMc04163
	SM_b21187	SMa0498
	SM_b21187	SM_b21187
	SM_b21187	SM_b21706
	SM_b21187	SMc04163
	SM_b21196	SM_b20758
	SM_b21196	SM_b21598
	SM_b21196	SMc01168
	SM_b21196	SMc01260
	SM_b21196	SMc01406
	SM_b21196	SMc01504
	SM_b21196	SMc02425
	SM_b21196	SMc04260
	SM_b21197	SM_b21270
	SM_b21208	SM_b21208
	SM_b21208	SMc02184
	SM_b21210	SMa0281
	SM_b21210	SM_b21210
	SM_b21222	SM_b20203
	SM_b21222	SM_b21169
	SM_b21222	SM_b21208
	SM_b21222	SM_b21222
	SM_b21222	SMc00490
	SM_b21222	SMc01592
	SM_b21222	SMc04315
	SM_b21270	SM_b21270
	SM_b21272	SM_b21272
	SM_b21272	SM_b21576
	SM_b21272	SMc01570
	SM_b21299	SMa0748
	SM_b21299	SM_b20426
	SM_b21299	SM_b21169
	SM_b21299	SM_b21299
	SM_b21299	SMc00098
	SM_b21299	SMc01092
	SM_b21299	SMc02323
	SM_b21317	SMa2107
	SM_b21317	SM_b20004
	SM_b21317	SM_b21601
	SM_b21317	SMc00698
	SM_b21317	SMc02340
	SM_b21317	SMc02888
	SM_b21317	SMc03816
	SM_b21317	SMc04055
	SM_b21336	SM_b21336
	SM_b21336	SM_b21359
	SM_b21346	SM_b20129
	SM_b21346	SM_b20162
	SM_b21346	SM_b20901
	SM_b21346	SM_b21346
	SM_b21346	SM_b21493
	SM_b21346	SMc02172
	SM_b21346	SMc03122
	SM_b21346	SMc04134
	SM_b21346	SMc04264
	SM_b21359	SM_b20215
	SM_b21359	SM_b21359
	SM_b21372	SM_b21372
	SM_b21372	SMc02030
	SM_b21419	SM_b21419
	SM_b21464	SM_b20683
	SM_b21464	SM_b21464
	SM_b21464	SMc01592
	SM_b21479	SM_b20674
	SM_b21479	SMc00109
	SM_b21479	SMc00654
	SM_b21479	SMc03046
	SM_b21484	SM_b21484
	SM_b21491	SM_b20021
	SM_b21491	SMc01592
	SM_b21491	SMc02584
	SM_b21493	SM_b20586
	SM_b21493	SM_b21493
	SM_b21493	SMc00829
	SM_b21493	SMc01223
	SM_b21494	SM_b21493
	SM_b21494	SMc00829
	SM_b21494	SMc01223
	SM_b21514	SMa1979
	SM_b21523	SMc02030
	SM_b21525	SM_b21525
	SM_b21525	SMc01974
	SM_b21533	SMa0748
	SM_b21533	SMa2004
	SM_b21533	SMa2107
	SM_b21533	SM_b20285
	SM_b21533	SM_b20537
	SM_b21533	SM_b21533
	SM_b21533	SMc00879
	SM_b21559	SMa1387
	SM_b21559	SMa2163
	SM_b21559	SMa5030
	SM_b21559	SM_b20021
	SM_b21559	SM_b20537
	SM_b21559	SM_b21336
	SM_b21559	SM_b21559
	SM_b21559	SMc02030
	SM_b21559	SMc04011
	SM_b21569	SM_b21569
	SM_b21576	SMa0303
	SM_b21576	SMa1749
	SM_b21576	SMa1987
	SM_b21576	SMc00283
	SM_b21576	SMc02647
	SM_b21576	SMc03170
	SM_b21598	SM_b20901
	SM_b21598	SM_b21598
	SM_b21598	SMc01592
	SM_b21598	SMc02172
	SM_b21598	SMc03890
	SM_b21600	SM_b21533
	SM_b21600	SMc02022
	SM_b21601	SM_b21601
	SM_b21641	SMa1954
	SM_b21641	SM_b20215
	SM_b21641	SM_b21641
	SM_b21641	SMc00479
	SM_b21641	SMc02223
	SM_b21641	SMc02366
	SM_b21641	SMc04169
	SM_b21650	SMa0402
	SM_b21650	SM_b20033
	SM_b21650	SM_b21650
	SM_b21650	SMc00275
	SM_b21650	SMc00785
	SM_b21706	SMa2287
	SM_b21706	SM_b20426
	SM_b21706	SM_b20582
	SM_b21706	SM_b20722
	SM_b21706	SM_b20901
	SM_b21706	SM_b21336
	SM_b21706	SM_b21346
	SM_b21706	SM_b21706
	SM_b21706	SMc00163
	SM_b21706	SMc00241
	SM_b21706	SMc02523
	SM_b21706	SMc03843
	SM_b21706	SMc04134
	SMa0063	SMa0063
	SMa0063	SMc04032
	SMa0078	SMa0078
	SMa0078	SM_b20048
	SMa0078	SM_b21601
	SMa0078	SMc01570
	SMa0078	SMc01762
	SMa0078	SMc02596
	SMa0089	SMa0498
	SMa0089	SMa0557
	SMa0089	SM_b20337
	SMa0089	SM_b20455
	SMa0089	SMc02030
	SMa0089	SMc02844
	SMa0089	SMc03123
	SMa0097	SMa0097
	SMa0097	SMa1454
	SMa0097	SM_b20441
	SMa0097	SM_b20773
	SMa0097	SM_b21208
	SMa0097	SMc02893
	SMa0101	SMa0097
	SMa0101	SMa1454
	SMa0101	SM_b20441
	SMa0101	SM_b20773
	SMa0101	SM_b21208
	SMa0101	SMc02893
	SMa0114	SMa0114
	SMa0179	SMa0179
	SMa0179	SMa1954
	SMa0179	SM_b20455
	SMa0179	SM_b20509
	SMa0179	SMc00058
	SMa0179	SMc04032
	SMa0190	SMa0190
	SMa0190	SM_b20033
	SMa0222	SMa0222
	SMa0222	SMc00780
	SMa0222	SMc01406
	SMa0222	SMc04348
	SMa0246	SMa0246
	SMa0247	SM_b20494
	SMa0247	SM_b21419
	SMa0281	SMa0281
	SMa0281	SMc00794
	SMa0303	SMa0303
	SMa0303	SMa2287
	SMa0303	SM_b20366
	SMa0303	SM_b21093
	SMa0303	SM_b21650
	SMa0303	SMc01593
	SMa0303	SMc02425
	SMa0303	SMc02560
	SMa0303	SMc03123
	SMa0303	SMc04203
	SMa0307	SMa0307
	SMa0307	SMa0520
	SMa0307	SMa1480
	SMa0307	SM_b21559
	SMa0319	SMa0319
	SMa0319	SM_b21115
	SMa0319	SMc02366
	SMa0347	SMa0347
	SMa0347	SM_b21208
	SMa0347	SMc00879
	SMa0355	SMa0355
	SMa0355	SMa1987
	SMa0355	SM_b20367
	SMa0355	SMc02030
	SMa0372	SMa0372
	SMa0372	SMa0520
	SMa0372	SM_b21493
	SMa0372	SMc00879
	SMa0372	SMc01610
	SMa0372	SMc04163
	SMa0402	SMa0402
	SMa0498	SMa0498
	SMa0498	SM_b21208
	SMa0498	SMc00058
	SMa0498	SMc01664
	SMa0498	SMc02184
	SMa0498	SMc02647
	SMa0498	SMc03258
	SMa0520	SMa0520
	SMa0520	SM_b21359
	SMa0520	SMc00953
	SMa0520	SMc04032
	SMa0557	SM_b20387
	SMa0557	SM_b20457
	SMa0557	SM_b21158
	SMa0557	SMc03843
	SMa0748	SMa0748
	SMa0748	SMa1207
	SMa0748	SMa1705
	SMa0748	SM_b20106
	SMa0748	SMc04011
	SMa0809	SMa0078
	SMa0809	SMa1705
	SMa0809	SM_b21576
	SMa0809	SMc02022
	SMa0809	SMc02175
	SMa0809	SMc02893
	SMa0809	SMc03122
	SMa0809	SMc04203
	SMa0809	SMc04220
	SMa0809	SMc04264
	SMa0815	SMa0319
	SMa0815	SMa0815
	SMa0815	SMc01223
	SMa0849	SMa0849
	SMa0955	SMa0955
	SMa0955	SM_b20258
	SMa0955	SM_b20537
	SMa0955	SMc01593
	SMa0955	SMc02470
	SMa0955	SMc02584
	SMa1067	SMa1067
	SMa1067	SMa1948
	SMa1067	SMc03046
	SMa1207	SMa1207
	SMa1299	SMa1299
	SMa1299	SM_b21559
	SMa1299	SMc00479
	SMa1299	SMc01139
	SMa1299	SMc01651
	SMa1387	SMa1387
	SMa1387	SMc01593
	SMa1387	SMc01908
	SMa1387	SMc04220
	SMa1442	SMa1442
	SMa1442	SMa2303
	SMa1442	SM_b21021
	SMa1454	SMa1454
	SMa1454	SMc02425
	SMa1480	SMa1480
	SMa1480	SMc00879
	SMa1480	SMc01403
	SMa1587	SMa1480
	SMa1587	SM_b20582
	SMa1587	SM_b21299
	SMa1587	SMc01403
	SMa1587	SMc01406
	SMa1587	SMc04264
	SMa1602	SMa1602
	SMa1602	SM_b20004
	SMa1602	SMc01092
	SMa1698	SMa1602
	SMa1698	SMa1954
	SMa1698	SM_b20211
	SMa1698	SM_b21359
	SMa1698	SMc02425
	SMa1705	SMa1705
	SMa1705	SM_b20494
	SMa1720	SMa1720
	SMa1720	SM_b20683
	SMa1726	SMa1726
	SMa1726	SMa1979
	SMa1726	SM_b21210
	SMa1726	SMc00831
	SMa1726	SMc01819
	SMa1736	SMa1736
	SMa1736	SMc00146
	SMa1736	SMc01664
	SMa1736	SMc02470
	SMa1749	SMa1749
	SMa1749	SMa1979
	SMa1749	SM_b20392
	SMa1749	SMc01593
	SMa1749	SMc04203
	SMa1893	SMa1893
	SMa1893	SM_b20215
	SMa1893	SM_b20935
	SMa1927	SM_b20039
	SMa1948	SMa1602
	SMa1948	SMa1948
	SMa1948	SM_b20516
	SMa1948	SM_b20758
	SMa1948	SM_b21346
	SMa1948	SMc00241
	SMa1948	SMc01406
	SMa1948	SMc03258
	SMa1948	SMc04260
	SMa1948	SMc04348
	SMa1954	SMa1954
	SMa1954	SMc03123
	SMa1954	SMc04032
	SMa1979	SMa1979
	SMa1979	SMc00256
	SMa1979	SMc00879
	SMa1979	SMc01504
	SMa1979	SMc01592
	SMa1987	SMa1987
	SMa1987	SM_b21021
	SMa1987	SMc02504
	SMa2004	SMa2004
	SMa2015	SMa2015
	SMa2015	SM_b20211
	SMa2015	SM_b21533
	SMa2015	SMc03060
	SMa2015	SMc04169
	SMa2027	SMa2027
	SMa2027	SMa2303
	SMa2027	SM_b20215
	SMa2049	SMa2049
	SMa2049	SMa5030
	SMa2049	SM_b20582
	SMa2049	SM_b21021
	SMa2107	SMa0303
	SMa2107	SMa2107
	SMa2107	SM_b20531
	SMa2163	SMa2163
	SMa2163	SM_b21576
	SMa2163	SMc03165
	SMa2215	SMa0748
	SMa2215	SMa1749
	SMa2215	SMa1979
	SMa2215	SMa2215
	SMa2215	SMa5030
	SMa2215	SM_b20123
	SMa2215	SM_b20203
	SMa2215	SM_b20896
	SMa2215	SM_b21102
	SMa2215	SM_b21115
	SMa2215	SM_b21222
	SMa2215	SMc01945
	SMa2215	SMc01974
	SMa2215	SMc02425
	SMa2215	SMc02560
	SMa2215	SMc02647
	SMa2215	SMc03122
	SMa2215	SMc04011
	SMa2215	SMc04055
	SMa2287	SMa0303
	SMa2287	SMa2287
	SMa2287	SMc00794
	SMa2287	SMc01139
	SMa2287	SMc03140
	SMa2303	SMa2303
	SMa2303	SMc02172
	SMa2303	SMc02470
	SMa2379	SMa1207
	SMa2379	SM_b20154
	SMa2379	SMc00829
	SMa2379	SMc01403
	SMa2379	SMc02175
	SMa2379	SMc02584
	SMa2387	SMa2387
	SMa2387	SMc00785
	SMa2387	SMc04348
	SMa5007	SMa1454
	SMa5007	SMa1480
	SMa5007	SMa1979
	SMa5007	SMa5007
	SMa5007	SM_b20129
	SMa5007	SM_b20457
	SMa5007	SM_b21493
	SMa5007	SM_b21525
	SMa5007	SMc00831
	SMa5007	SMc01495
	SMa5007	SMc01593
	SMa5007	SMc01768
	SMa5007	SMc03820
	SMa5030	SMa5030
	SMa5030	SM_b21598
	SMa5030	SMc00679
	SMc00009	SM_b20215
	SMc00009	SM_b20537
	SMc00009	SMc00679
	SMc00009	SMc00766
	SMc00009	SMc01403
	SMc00013	SMc00163
	SMc00017	SMa0190
	SMc00017	SMa1602
	SMc00023	SMa1602
	SMc00023	SMc00109
	SMc00033	SM_b20509
	SMc00033	SM_b20683
	SMc00033	SM_b21272
	SMc00033	SM_b21601
	SMc00033	SMc02976
	SMc00034	SMa1736
	SMc00034	SM_b20674
	SMc00034	SM_b21079
	SMc00034	SM_b21210
	SMc00034	SM_b21346
	SMc00034	SMc00794
	SMc00034	SMc01504
	SMc00034	SMc02140
	SMc00034	SMc02175
	SMc00036	SM_b21598
	SMc00036	SMc02470
	SMc00040	SMc00098
	SMc00040	SMc01945
	SMc00058	SMa0097
	SMc00058	SM_b20055
	SMc00058	SM_b20901
	SMc00058	SM_b21169
	SMc00058	SMc00058
	SMc00058	SMc00107
	SMc00058	SMc01768
	SMc00059	SMa0190
	SMc00059	SMa0372
	SMc00059	SM_b20537
	SMc00059	SMc01762
	SMc00059	SMc02366
	SMc00059	SMc03046
	SMc00067	SMa0114
	SMc00067	SMa0849
	SMc00067	SMa1602
	SMc00067	SMa1705
	SMc00067	SMa2049
	SMc00067	SMa2287
	SMc00067	SM_b20055
	SMc00067	SM_b21079
	SMc00067	SM_b21299
	SMc00067	SMc00679
	SMc00067	SMc00929
	SMc00067	SMc01570
	SMc00067	SMc03165
	SMc00067	SMc03873
	SMc00067	SMc03890
	SMc00067	SMc04143
	SMc00067	SMc04882
	SMc00070	SMc04143
	SMc00088	SMa0281
	SMc00088	SM_b21641
	SMc00098	SMc00098
	SMc00098	SMc01945
	SMc00100	SM_b20586
	SMc00100	SMc00380
	SMc00100	SMc01260
	SMc00100	SMc01819
	SMc00100	SMc03046
	SMc00100	SMc03123
	SMc00105	SMa0097
	SMc00107	SM_b21569
	SMc00107	SMc00107
	SMc00109	SMa0347
	SMc00109	SMa0498
	SMc00109	SMa2303
	SMc00109	SM_b20203
	SMc00109	SM_b21346
	SMc00109	SMc00109
	SMc00109	SMc01092
	SMc00120	SMa2027
	SMc00120	SM_b20683
	SMc00120	SM_b21419
	SMc00120	SMc01563
	SMc00120	SMc02866
	SMc00140	SM_b20055
	SMc00140	SM_b21187
	SMc00140	SMc00829
	SMc00140	SMc03816
	SMc00140	SMc04109
	SMc00146	SMc00146
	SMc00146	SMc04109
	SMc00148	SMa1480
	SMc00148	SM_b20758
	SMc00148	SM_b21533
	SMc00148	SMc00929
	SMc00148	SMc01651
	SMc00148	SMc02866
	SMc00149	SMa1299
	SMc00149	SM_b21641
	SMc00149	SMc00646
	SMc00149	SMc02140
	SMc00149	SMc02366
	SMc00150	SMa1299
	SMc00150	SM_b20773
	SMc00150	SM_b21641
	SMc00150	SMc00646
	SMc00150	SMc02366
	SMc00155	SM_b20667
	SMc00155	SMc01225
	SMc00155	SMc03890
	SMc00159	SMa1987
	SMc00159	SM_b20123
	SMc00159	SM_b20817
	SMc00159	SM_b21080
	SMc00159	SM_b21336
	SMc00159	SM_b21650
	SMc00159	SMc00275
	SMc00159	SMc01593
	SMc00159	SMc02172
	SMc00159	SMc02504
	SMc00163	SM_b20817
	SMc00163	SMc00163
	SMc00163	SMc03820
	SMc00163	SMc04134
	SMc00174	SMa0955
	SMc00176	SMa0520
	SMc00176	SM_b20722
	SMc00176	SM_b21079
	SMc00176	SMc00275
	SMc00176	SMc00646
	SMc00182	SMc00182
	SMc00191	SM_b20106
	SMc00191	SM_b21493
	SMc00191	SMc00654
	SMc00191	SMc01168
	SMc00191	SMc03046
	SMc00234	SMc02366
	SMc00234	SMc04011
	SMc00234	SMc04169
	SMc00235	SMc01563
	SMc00241	SMa1726
	SMc00241	SM_b20048
	SMc00241	SM_b20582
	SMc00241	SM_b20683
	SMc00241	SMc00241
	SMc00241	SMc01225
	SMc00241	SMc01610
	SMc00241	SMc03873
	SMc00241	SMc04109
	SMc00256	SM_b20896
	SMc00256	SMc00256
	SMc00256	SMc04264
	SMc00275	SMc00275
	SMc00283	SMc00283
	SMc00289	SMc00163
	SMc00289	SMc04162
	SMc00293	SM_b20055
	SMc00300	SM_b21115
	SMc00300	SM_b21187
	SMc00300	SMc01225
	SMc00300	SMc01908
	SMc00328	SMc02504
	SMc00333	SMa1454
	SMc00362	SM_b20162
	SMc00362	SMc00109
	SMc00362	SMc03150
	SMc00362	SMc03816
	SMc00362	SMc04134
	SMc00363	SMa2303
	SMc00363	SM_b21180
	SMc00363	SM_b21359
	SMc00363	SMc01168
	SMc00363	SMc02172
	SMc00363	SMc02366
	SMc00375	SMc02172
	SMc00375	SMc02584
	SMc00380	SM_b20039
	SMc00380	SMc00182
	SMc00380	SMc00256
	SMc00380	SMc00380
	SMc00380	SMc02647
	SMc00409	SMa0222
	SMc00409	SMa1948
	SMc00409	SMa2027
	SMc00409	SMc01651
	SMc00409	SMc04348
	SMc00410	SM_b21008
	SMc00414	SMc02584
	SMc00414	SMc03873
	SMc00415	SMc00241
	SMc00432	SM_b20722
	SMc00432	SMc00275
	SMc00432	SMc01225
	SMc00432	SMc01975
	SMc00432	SMc02366
	SMc00432	SMc02523
	SMc00432	SMc02893
	SMc00433	SMc02523
	SMc00458	SMc00458
	SMc00475	SMc00241
	SMc00475	SMc02851
	SMc00479	SMc00479
	SMc00479	SMc04203
	SMc00485	SMa0179
	SMc00485	SMa1387
	SMc00485	SM_b21346
	SMc00485	SMc00256
	SMc00488	SMa1602
	SMc00488	SMa1893
	SMc00488	SM_b20509
	SMc00488	SMc00646
	SMc00488	SMc03998
	SMc00489	SMa0748
	SMc00489	SMa2107
	SMc00489	SM_b20859
	SMc00489	SM_b21021
	SMc00489	SMc00558
	SMc00489	SMc00785
	SMc00489	SMc01768
	SMc00489	SMc02022
	SMc00489	SMc02866
	SMc00489	SMc03015
	SMc00490	SMc00098
	SMc00490	SMc00490
	SMc00490	SMc01403
	SMc00490	SMc02777
	SMc00492	SMa0114
	SMc00492	SMa0307
	SMc00492	SM_b20258
	SMc00492	SM_b21093
	SMc00492	SMc00766
	SMc00492	SMc01168
	SMc00492	SMc01610
	SMc00492	SMc02223
	SMc00492	SMc02504
	SMc00492	SMc02560
	SMc00492	SMc02976
	SMc00492	SMc04163
	SMc00492	SMc04260
	SMc00493	SMc02851
	SMc00494	SMc01139
	SMc00494	SMc02030
	SMc00494	SMc03843
	SMc00505	SMc04143
	SMc00508	SM_b20901
	SMc00528	SMa1749
	SMc00528	SM_b20674
	SMc00528	SM_b21222
	SMc00528	SMc00785
	SMc00528	SMc02560
	SMc00528	SMc04203
	SMc00548	SM_b21569
	SMc00551	SM_b20123
	SMc00551	SMc02523
	SMc00551	SMc03060
	SMc00551	SMc04055
	SMc00554	SMa0097
	SMc00554	SMa0303
	SMc00554	SMa0319
	SMc00554	SMa0372
	SMc00554	SMa1454
	SMc00554	SM_b20055
	SMc00554	SM_b20154
	SMc00554	SM_b20537
	SMc00554	SM_b21464
	SMc00554	SM_b21493
	SMc00554	SMc00058
	SMc00554	SMc00785
	SMc00554	SMc01630
	SMc00554	SMc02030
	SMc00554	SMc02851
	SMc00554	SMc03258
	SMc00555	SMc04134
	SMc00558	SM_b21336
	SMc00558	SMc00558
	SMc00570	SM_b21598
	SMc00570	SMc00458
	SMc00570	SMc00646
	SMc00570	SMc02470
	SMc00571	SM_b21598
	SMc00571	SMc00458
	SMc00571	SMc00646
	SMc00571	SMc02470
	SMc00572	SMa2303
	SMc00572	SM_b20935
	SMc00572	SM_b21359
	SMc00572	SM_b21484
	SMc00572	SMc02866
	SMc00573	SMc02584
	SMc00573	SMc04032
	SMc00575	SMa0815
	SMc00575	SMc00098
	SMc00576	SMa0849
	SMc00576	SMa1705
	SMc00576	SMc00780
	SMc00576	SMc01908
	SMc00576	SMc03015
	SMc00576	SMc03816
	SMc00581	SM_b21158
	SMc00581	SM_b21641
	SMc00581	SMc00479
	SMc00590	SMc02022
	SMc00590	SMc02866
	SMc00593	SM_b21021
	SMc00593	SMc00283
	SMc00593	SMc00458
	SMc00594	SM_b21021
	SMc00594	SMc00283
	SMc00594	SMc00458
	SMc00594	SMc02523
	SMc00604	SMa1987
	SMc00604	SMa2287
	SMc00604	SM_b20129
	SMc00604	SM_b21180
	SMc00604	SMc00654
	SMc00604	SMc01787
	SMc00604	SMc01945
	SMc00604	SMc03046
	SMc00604	SMc03123
	SMc00608	SMa0347
	SMc00608	SMa0372
	SMc00609	SMa0347
	SMc00609	SMa0372
	SMc00610	SMa0748
	SMc00610	SMc01945
	SMc00610	SMc03890
	SMc00610	SMc04169
	SMc00618	SM_b20033
	SMc00620	SM_b20509
	SMc00638	SMa0748
	SMc00638	SMa1987
	SMc00638	SMa2004
	SMc00638	SM_b20203
	SMc00638	SM_b20258
	SMc00638	SM_b20441
	SMc00638	SM_b20582
	SMc00638	SM_b21210
	SMc00638	SM_b21650
	SMc00638	SMc00785
	SMc00638	SMc01563
	SMc00638	SMc01593
	SMc00638	SMc02523
	SMc00638	SMc02984
	SMc00638	SMc03046
	SMc00641	SMa0246
	SMc00643	SM_b20129
	SMc00643	SMc00163
	SMc00646	SMa2215
	SMc00646	SM_b20531
	SMc00646	SMc00646
	SMc00646	SMc04203
	SMc00651	SMa0347
	SMc00651	SM_b20509
	SMc00651	SM_b21484
	SMc00651	SMc01974
	SMc00652	SMa0347
	SMc00652	SM_b20509
	SMc00652	SM_b21484
	SMc00652	SMc01974
	SMc00654	SMa0319
	SMc00654	SMa0498
	SMc00654	SMa2287
	SMc00654	SM_b20106
	SMc00654	SM_b20426
	SMc00654	SM_b20896
	SMc00654	SM_b21187
	SMc00654	SMc00654
	SMc00654	SMc00829
	SMc00654	SMc02560
	SMc00654	SMc03150
	SMc00654	SMc03816
	SMc00654	SMc04220
	SMc00655	SMa0319
	SMc00655	SMa0498
	SMc00655	SMa2287
	SMc00655	SMc00654
	SMc00655	SMc03816
	SMc00655	SMc04220
	SMc00679	SMa0063
	SMc00679	SM_b21187
	SMc00679	SM_b21210
	SMc00679	SMc00679
	SMc00679	SMc01403
	SMc00679	SMc02888
	SMc00683	SMa0190
	SMc00683	SMa1720
	SMc00690	SMa2004
	SMc00690	SM_b20258
	SMc00690	SMc01787
	SMc00690	SMc01908
	SMc00698	SM_b20582
	SMc00698	SMc00458
	SMc00698	SMc00479
	SMc00698	SMc00698
	SMc00698	SMc01269
	SMc00698	SMc01762
	SMc00703	SMa0078
	SMc00703	SMa0114
	SMc00703	SMa1480
	SMc00703	SM_b20055
	SMc00703	SM_b20258
	SMc00703	SM_b20773
	SMc00703	SM_b21569
	SMc00703	SMc00275
	SMc00703	SMc00829
	SMc00704	SM_b20366
	SMc00704	SMc00458
	SMc00704	SMc00794
	SMc00704	SMc01260
	SMc00704	SMc04143
	SMc00720	SMa0097
	SMc00720	SMa2215
	SMc00720	SM_b20033
	SMc00720	SM_b21115
	SMc00720	SMc02560
	SMc00737	SMa0063
	SMc00737	SMa0246
	SMc00737	SMa0402
	SMc00737	SMa0955
	SMc00737	SMa1299
	SMc00737	SMa2015
	SMc00737	SMc01504
	SMc00737	SMc01615
	SMc00737	SMc02223
	SMc00737	SMc02470
	SMc00737	SMc03873
	SMc00737	SMc04220
	SMc00762	SM_b21102
	SMc00766	SM_b21359
	SMc00766	SMc00766
	SMc00766	SMc02844
	SMc00766	SMc04109
	SMc00780	SMa1979
	SMc00780	SM_b21576
	SMc00780	SMc00098
	SMc00780	SMc00780
	SMc00781	SMa1979
	SMc00781	SM_b21576
	SMc00781	SMc00098
	SMc00781	SMc00780
	SMc00785	SMa0347
	SMc00785	SMa0498
	SMc00785	SM_b20004
	SMc00785	SM_b20211
	SMc00785	SM_b20347
	SMc00785	SMc00283
	SMc00785	SMc00785
	SMc00785	SMc00831
	SMc00785	SMc00879
	SMc00785	SMc04203
	SMc00786	SMa2027
	SMc00786	SM_b20123
	SMc00786	SM_b20154
	SMc00786	SMc00785
	SMc00786	SMc00794
	SMc00786	SMc03890
	SMc00791	SM_b20211
	SMc00791	SMc00929
	SMc00794	SM_b20106
	SMc00794	SM_b20211
	SMc00794	SM_b20276
	SMc00794	SM_b20582
	SMc00794	SMc00458
	SMc00794	SMc01269
	SMc00794	SMc03890
	SMc00813	SMc00879
	SMc00820	SMa0063
	SMc00820	SMa1207
	SMc00820	SM_b20203
	SMc00820	SM_b20276
	SMc00820	SM_b20531
	SMc00820	SM_b21021
	SMc00820	SMc00820
	SMc00820	SMc03165
	SMc00821	SMa0063
	SMc00821	SMa1207
	SMc00821	SM_b20203
	SMc00821	SM_b20276
	SMc00821	SM_b20531
	SMc00821	SM_b21021
	SMc00821	SMc00820
	SMc00821	SMc03165
	SMc00825	SM_b20387
	SMc00825	SMc00163
	SMc00825	SMc02984
	SMc00829	SMa2049
	SMc00829	SM_b20441
	SMc00829	SM_b20817
	SMc00829	SMc00829
	SMc00829	SMc00831
	SMc00829	SMc01819
	SMc00830	SMa2049
	SMc00830	SM_b20441
	SMc00830	SM_b20817
	SMc00830	SMc00829
	SMc00830	SMc00831
	SMc00830	SMc01819
	SMc00831	SMa0063
	SMc00831	SMa5007
	SMc00831	SM_b20387
	SMc00831	SMc00829
	SMc00831	SMc00831
	SMc00831	SMc00878
	SMc00831	SMc01330
	SMc00831	SMc01615
	SMc00860	SMc02777
	SMc00872	SMa0303
	SMc00872	SM_b20582
	SMc00872	SMc00241
	SMc00877	SM_b21336
	SMc00877	SMc00877
	SMc00878	SMa1454
	SMc00878	SM_b20758
	SMc00878	SMc00878
	SMc00879	SM_b20004
	SMc00879	SMc00283
	SMc00879	SMc00879
	SMc00879	SMc02523
	SMc00879	SMc02984
	SMc00888	SMa5030
	SMc00888	SM_b21117
	SMc00888	SMc00646
	SMc00888	SMc00679
	SMc00888	SMc01269
	SMc00888	SMc01563
	SMc00888	SMc04011
	SMc00896	SMa0097
	SMc00896	SMc00058
	SMc00896	SMc01762
	SMc00896	SMc01945
	SMc00916	SMa0097
	SMc00916	SMa1602
	SMc00916	SMa2027
	SMc00916	SM_b20211
	SMc00916	SMc03816
	SMc00916	SMc04011
	SMc00929	SMc00929
	SMc00943	SMa1387
	SMc00943	SMc00241
	SMc00943	SMc00679
	SMc00943	SMc02984
	SMc00944	SMa1387
	SMc00944	SMc00241
	SMc00944	SMc00679
	SMc00944	SMc02984
	SMc00947	SMa0246
	SMc00947	SMa0748
	SMc00947	SM_b20004
	SMc00947	SM_b21493
	SMc00947	SMc01403
	SMc00947	SMc01504
	SMc00947	SMc01593
	SMc00947	SMc02429
	SMc00947	SMc04162
	SMc00948	SMa1893
	SMc00953	SM_b20674
	SMc00953	SM_b21484
	SMc00953	SM_b21569
	SMc00953	SMc00953
	SMc00953	SMc01269
	SMc00953	SMc01945
	SMc00953	SMc02596
	SMc00953	SMc03873
	SMc00964	SM_b20211
	SMc00964	SM_b20525
	SMc00975	SMc01563
	SMc00975	SMc03046
	SMc00978	SMc00098
	SMc00978	SMc00794
	SMc00978	SMc01260
	SMc00978	SMc02323
	SMc00983	SM_b20004
	SMc00983	SM_b20387
	SMc00983	SM_b21222
	SMc00983	SM_b21569
	SMc00983	SMc03816
	SMc00987	SMa0347
	SMc00987	SM_b21270
	SMc00987	SMc01593
	SMc00987	SMc02596
	SMc00987	SMc03820
	SMc00990	SMc00831
	SMc01010	SMa2163
	SMc01010	SM_b20021
	SMc01018	SMa0281
	SMc01018	SMc00679
	SMc01018	SMc01762
	SMc01025	SM_b20347
	SMc01052	SM_b20901
	SMc01052	SMc00679
	SMc01052	SMc01819
	SMc01052	SMc03150
	SMc01092	SM_b20033
	SMc01092	SMc00058
	SMc01092	SMc00558
	SMc01092	SMc01092
	SMc01092	SMc01974
	SMc01104	SMa0190
	SMc01104	SMa2287
	SMc01104	SM_b20537
	SMc01104	SM_b21272
	SMc01108	SMa2049
	SMc01108	SM_b20004
	SMc01108	SM_b20033
	SMc01108	SM_b21569
	SMc01108	SM_b21601
	SMc01108	SMc00831
	SMc01108	SMc00878
	SMc01108	SMc01570
	SMc01108	SMc03258
	SMc01108	SMc04162
	SMc01120	SM_b21641
	SMc01121	SMc01570
	SMc01127	SMc00558
	SMc01136	SMa0319
	SMc01136	SM_b20129
	SMc01136	SM_b20219
	SMc01136	SMc00107
	SMc01136	SMc00256
	SMc01136	SMc02504
	SMc01136	SMc03998
	SMc01139	SMc01139
	SMc01152	SMa0114
	SMc01152	SM_b21706
	SMc01163	SMa0849
	SMc01163	SM_b20106
	SMc01163	SM_b20154
	SMc01163	SMc00283
	SMc01163	SMc00785
	SMc01163	SMc00831
	SMc01163	SMc02976
	SMc01164	SM_b20154
	SMc01164	SM_b21272
	SMc01164	SMc02523
	SMc01165	SM_b20154
	SMc01165	SMc03060
	SMc01167	SMa0281
	SMc01167	SMc00698
	SMc01167	SMc01504
	SMc01168	SMa2027
	SMc01168	SMa5030
	SMc01168	SM_b20366
	SMc01168	SM_b20586
	SMc01168	SM_b20683
	SMc01169	SMa2027
	SMc01169	SMa5030
	SMc01169	SM_b20366
	SMc01169	SM_b20586
	SMc01169	SM_b20683
	SMc01187	SMc00458
	SMc01187	SMc00785
	SMc01187	SMc01092
	SMc01187	SMc02366
	SMc01200	SM_b21650
	SMc01200	SMc02866
	SMc01202	SM_b20039
	SMc01202	SM_b20048
	SMc01202	SMc00878
	SMc01202	SMc02866
	SMc01208	SM_b20935
	SMc01209	SM_b21080
	SMc01209	SM_b21493
	SMc01209	SM_b21706
	SMc01209	SMc00679
	SMc01209	SMc00794
	SMc01209	SMc01139
	SMc01209	SMc01168
	SMc01209	SMc01225
	SMc01209	SMc01504
	SMc01209	SMc02030
	SMc01209	SMc03873
	SMc01209	SMc04143
	SMc01215	SMa0190
	SMc01215	SMa0815
	SMc01215	SM_b20048
	SMc01215	SMc02584
	SMc01223	SMa2215
	SMc01223	SMc01223
	SMc01225	SMa5007
	SMc01225	SMc00241
	SMc01225	SMc01225
	SMc01231	SMa1987
	SMc01231	SM_b20457
	SMc01231	SMc02184
	SMc01231	SMc02777
	SMc01231	SMc02984
	SMc01231	SMc03122
	SMc01235	SMa1454
	SMc01235	SMc00879
	SMc01235	SMc01330
	SMc01235	SMc01787
	SMc01235	SMc02184
	SMc01260	SM_b20004
	SMc01260	SMc01260
	SMc01260	SMc03140
	SMc01260	SMc03820
	SMc01269	SMc01269
	SMc01283	SMc00820
	SMc01283	SMc02866
	SMc01285	SM_b20901
	SMc01285	SMc02523
	SMc01287	SMc00182
	SMc01287	SMc02866
	SMc01289	SMc04109
	SMc01292	SM_b20123
	SMc01294	SMa0063
	SMc01294	SM_b20586
	SMc01294	SM_b21008
	SMc01294	SM_b21484
	SMc01294	SMc00679
	SMc01294	SMc02223
	SMc01296	SMa2303
	SMc01296	SM_b20203
	SMc01296	SM_b20935
	SMc01299	SMc00878
	SMc01306	SMc01787
	SMc01309	SM_b20211
	SMc01309	SMc02470
	SMc01310	SM_b20586
	SMc01310	SM_b21493
	SMc01316	SMa0097
	SMc01318	SMc02235
	SMc01321	SMc02235
	SMc01327	SMa1954
	SMc01327	SMa2015
	SMc01327	SMa2107
	SMc01327	SM_b20901
	SMc01327	SMc02504
	SMc01327	SMc04143
	SMc01330	SMc01330
	SMc01331	SMc00794
	SMc01331	SMc03816
	SMc01333	SMa1299
	SMc01333	SMc02984
	SMc01336	SMc01651
	SMc01336	SMc04011
	SMc01347	SMa1948
	SMc01347	SM_b20516
	SMc01347	SM_b20859
	SMc01347	SM_b21079
	SMc01347	SM_b21372
	SMc01347	SMc01403
	SMc01347	SMc01504
	SMc01347	SMc01563
	SMc01347	SMc02866
	SMc01350	SM_b20039
	SMc01354	SM_b21208
	SMc01354	SMc02366
	SMc01357	SMa2163
	SMc01357	SMc00479
	SMc01357	SMc03046
	SMc01403	SM_b21222
	SMc01403	SM_b21650
	SMc01403	SMc01403
	SMc01403	SMc01762
	SMc01403	SMc03873
	SMc01406	SMa1979
	SMc01406	SMc01403
	SMc01406	SMc01406
	SMc01406	SMc04109
	SMc01428	SM_b20211
	SMc01428	SM_b21008
	SMc01428	SM_b21346
	SMc01428	SM_b21576
	SMc01428	SMc01945
	SMc01428	SMc02323
	SMc01431	SM_b20531
	SMc01431	SMc00275
	SMc01431	SMc02175
	SMc01431	SMc03873
	SMc01431	SMc04134
	SMc01495	SMa2387
	SMc01495	SM_b20455
	SMc01495	SM_b20457
	SMc01495	SM_b20901
	SMc01495	SM_b21080
	SMc01495	SMc00794
	SMc01495	SMc01495
	SMc01495	SMc01504
	SMc01495	SMc02984
	SMc01504	SMc00785
	SMc01504	SMc00794
	SMc01504	SMc01504
	SMc01524	SMa0372
	SMc01524	SMc00458
	SMc01534	SMa1726
	SMc01535	SMc00679
	SMc01535	SMc04134
	SMc01556	SMc02844
	SMc01563	SMa0114
	SMc01563	SM_b20004
	SMc01563	SMc01269
	SMc01563	SMc01563
	SMc01563	SMc02584
	SMc01563	SMc03046
	SMc01569	SM_b20896
	SMc01569	SMc00098
	SMc01569	SMc01406
	SMc01569	SMc01908
	SMc01569	SMc02223
	SMc01569	SMc04162
	SMc01570	SMa1720
	SMc01570	SM_b21525
	SMc01570	SMc00929
	SMc01570	SMc01570
	SMc01570	SMc02175
	SMc01570	SMc03890
	SMc01570	SMc04162
	SMc01578	SMa0955
	SMc01578	SMa1480
	SMc01578	SMc04055
	SMc01579	SMc00654
	SMc01579	SMc01269
	SMc01579	SMc02984
	SMc01579	SMc03873
	SMc01585	SMa1893
	SMc01585	SMa2015
	SMc01585	SMa2215
	SMc01585	SM_b20426
	SMc01585	SMc02523
	SMc01588	SMa1720
	SMc01588	SMa5030
	SMc01588	SM_b20219
	SMc01588	SM_b21598
	SMc01588	SMc01260
	SMc01588	SMc02523
	SMc01592	SM_b20021
	SMc01592	SM_b21115
	SMc01592	SM_b21222
	SMc01592	SMc00256
	SMc01592	SMc00479
	SMc01592	SMc01592
	SMc01592	SMc03816
	SMc01592	SMc03890
	SMc01592	SMc04264
	SMc01593	SMa1749
	SMc01593	SMa1987
	SMc01593	SM_b21484
	SMc01593	SMc01593
	SMc01593	SMc02030
	SMc01593	SMc02560
	SMc01593	SMc02866
	SMc01605	SMc01269
	SMc01605	SMc01610
	SMc01605	SMc01787
	SMc01610	SMa1749
	SMc01610	SM_b21525
	SMc01610	SMc00241
	SMc01610	SMc01225
	SMc01610	SMc01260
	SMc01610	SMc01610
	SMc01610	SMc01768
	SMc01610	SMc01787
	SMc01610	SMc02523
	SMc01615	SM_b20531
	SMc01615	SM_b21158
	SMc01615	SMc00283
	SMc01615	SMc01615
	SMc01615	SMc02560
	SMc01630	SMc01630
	SMc01651	SM_b20347
	SMc01651	SM_b20859
	SMc01651	SMc01592
	SMc01651	SMc01651
	SMc01664	SMa0557
	SMc01664	SMc01664
	SMc01700	SMc03210
	SMc01719	SMa1480
	SMc01719	SM_b21208
	SMc01719	SMc01225
	SMc01719	SMc02470
	SMc01719	SMc02893
	SMc01719	SMc04134
	SMc01723	SMa2049
	SMc01726	SMc04260
[truncated: 1,041 more rows]
