# Supplementary material for: Rhizobium etli CFN42 and Sinorhizobium meliloti 1021 bioinformatic transcriptional regulatory networks from culture and symbiosis
Source: Front Bioinform. 2024 Aug 28;4:1419274. doi: 10.3389/fbinf.2024.1419274 (PMC11387232; doi:10.3389/fbinf.2024.1419274)
Supplement: Supplementary file 7 [file Table7.xlsx]

## Sheet: Hoja1
a) MM R. etli CFN42 Network												b) Bacteroid R. etli CFN42 Network												c) Free-Living S. meliloti 1021 Network													d) Bacteroid S. meliloti 1021 Network
Level_1									Capa1	Total connections		Level_1									Capa1	Total connections		Level_1										Capa1	Total connections		Level_1										Capa1	Total connections
RHE_RS15800	chr	-	RHE_RS15800	COG0640	K	ArsR family transcriptional regulator	3038		RHE_RS15800	33		RHE_RS06405	chr	-	RHE_RS06405	COG4957	K	transcriptional regulator	1230		RHE_RS06405	45		SMc02172	-	SMc02172	NP_384581.1	409	COG1940	KG	transcriptional regulator	476		SMc02172	20		SMc02172	-	SMc02172	NP_384581.1	409	COG1940	KG	transcriptional regulator	476		SMc02172	20
RHE_RS17050	chr	-	RHE_RS17050	COG0745	TK	DNA-binding response regulator	3281		RHE_RS17050	49
												Level_2									Capa2			Level_2										Capa2			Level_2										Capa2
Level_2									Capa2			RHE_RS17835	chr	-	RHE_RS17835	COG0640	K	ArsR family transcriptional regulator	3429		RHE_RS17835	30		SMc00785	rirA	SMc00785	NP_384836.1	154	COG1959	K	iron-responsive transcriptional regulator	732		SMc00785	20		SMc04134	-	SMc04134	NP_384224.1	225	COG1309	K	transcriptional regulator	118		SMc04134	15
RHE_RS05945	chr	-	RHE_RS05945	COG2197	TK	LuxR family transcriptional regulator	1137		RHE_RS05945	43														SM_b21598	-	SM_b21598	NP_437578.1	349	COG1609	K	transcriptional regulator (plasmid)	5687		SM_b21598	19		SMa0498	-	SMa0498	NP_435508.1	299	COG0583	K	LysR family transcriptional regulator (plasmid)	3623		SMa0498	16
RHE_RS05495	chr	-	RHE_RS05495	COG0640	K	ArsR family transcriptional regulator	1055		RHE_RS05495	32		Level_3									Capa3			SMc03816	-	SMc03816	NP_387305.1	400	COG1846	K	transcriptional regulator	3216		SMc03816	19		SMc03122	-	SMc03122	NP_387077.1	315	COG0583	K	transcriptional regulator	2980		SMc03122	15
RHE_RS06405	chr	-	RHE_RS06405	COG4957	K	transcriptional regulator	1230		RHE_RS06405	42		RHE_RS25040	p42e	-	RHE_RS25040	COG4189	K	transcriptional regulator	4804		RHE_RS25040	27		SMc01593	-	SMc01593	NP_386443.1	234	COG0745	TK	transcriptional regulator	2346		SMc01593	21		SMa1207	-	SMa1207	NP_435903.2	226	COG0664	T	Crp family transcriptional regulator (plasmid)	4020		SMa1207	17
												RHE_RS20580	chr	-	RHE_RS20580	COG0568	K	RNA polymerase factor sigma-32	3969		RHE_RS20580	28															SMc00278	-	SMc00278	NP_385812.1	160	COG1522	K	transcriptional regulator	1711		SMc00278	15
Level_3									Capa3			RHE_RS23635	p42c	-	RHE_RS23635	COG1522	K	Lrp/AsnC family transcriptional regulator	4528		RHE_RS23635	25		Level_3										Capa3
RHE_RS12775	chr	-	RHE_RS12775	COG0583	K	LysR family transcriptional regulator	2466		RHE_RS12775	36														SM_b21641	paaX	SM_b21641	NP_438100.1	306	COG3327	K	ArsR family transcriptional regulator (plasmid)	6208		SM_b21641	21		Level_3										Capa3
RHE_RS00415	chr	-	RHE_RS00415	COG1309	K	TetR/AcrR family transcriptional regulator	74		RHE_RS00415	30		Level_4									Capa4			SMc02425	-	SMc02425	NP_386706.1	225	COG1802	K	transcriptional regulator	2610		SMc02425	18		SMa0748	-	SMa0748	NP_435644.2	149	COG4957	K	MucR family transcriptional regulator (plasmid)	3757		SMa0748	13
RHE_RS24090	p42e	-	RHE_RS24090	COG3279	KT	response regulator	4617		RHE_RS24090	32		RHE_RS05255	chr	-	RHE_RS05255	COG1974	KT	transcriptional regulator	1010		RHE_RS05255	21		SMc04134	-	SMc04134	NP_384224.1	225	COG1309	K	transcriptional regulator	118		SMc04134	18		SM_b20162	-	SM_b20162	NP_436702.1	229	COG2197	TK	transcriptional regulator (plasmid)	4812		SM_b20162	12
RHE_RS20575	chr	-	RHE_RS20575	COG1329	K	CarD family transcriptional regulator	3968		RHE_RS20575	28		RHE_RS26495	p42f	-	RHE_RS26495	COG0583	K	LysR family transcriptional regulator	5089		RHE_RS26495	26		SMa0498	-	SMa0498	NP_435508.1	299	COG0583	K	LysR family transcriptional regulator (plasmid)	3623		SMa0498	19		SM_b21222	-	SM_b21222	NP_437266.1	409	COG1940	KG	transcriptional regulator (plasmid)	5378		SM_b21222	16
RHE_RS27560	p42f	-	RHE_RS27560	COG1609	K	LacI family DNA-binding transcriptional regulator	5301		RHE_RS27560	32		RHE_RS10580	chr	-	RHE_RS10580	COG1609	K	LacI family transcriptional regulator	2042		RHE_RS10580	21		SMa5030	-	SMa5030	YP_002000352.1	221	COG1309	K	TetR family transcriptional regulator (plasmid)	4091		SMa5030	18		SMc02470	-	SMc02470	NP_387171.1	401	COG1846	K	transcriptional regulator	3075		SMc02470	13
RHE_RS23635	p42c	-	RHE_RS23635	COG1522	K	Lrp/AsnC family transcriptional regulator	4528		RHE_RS23635	30		RHE_RS27280	p42f	-	RHE_RS27280	COG1802	K	GntR family transcriptional regulator	5247		RHE_RS27280	19															SM_b20582	-	SM_b20582	NP_438034.1	306	COG0583	K	LysR family transcriptional regulator (plasmid)	6142		SM_b20582	15
RHE_RS15890	chr	-	RHE_RS15890	COG1846	K	MarR family transcriptional regulator	3056		RHE_RS15890	33		RHE_RS11740	chr	-	RHE_RS11740	COG1802	K	GntR family transcriptional regulator	2269		RHE_RS11740	27		Level_4										Capa4			SMc04163	-	SMc04163	NP_386098.1	298	COG0583	K	transcriptional regulator	2000		SMc04163	11
RHE_RS17835	chr	-	RHE_RS17835	COG0640	K	ArsR family transcriptional regulator	3429		RHE_RS17835	32		RHE_RS00185	chr	-	RHE_RS00185	COG0745	TK	DNA-binding response regulator	35		RHE_RS00185	37		SM_b20582	-	SM_b20582	NP_438034.1	306	COG0583	K	LysR family transcriptional regulator (plasmid)	6142		SM_b20582	15		SMc02323	-	SMc02323	NP_384735.1	270	COG1349	KG	transcriptional regulator	631		SMc02323	12
												RHE_RS15890	chr	-	RHE_RS15890	COG1846	K	MarR family transcriptional regulator	3056		RHE_RS15890	24		SMc00163	-	SMc00163	NP_385950.1	340	COG1879	G	transcriptional regulator	1850		SMc00163	17		SMc02560	chvI	SMc02560	NP_384150.1	240	COG0745	TK	transcriptional regulator	44		SMc02560	14
Level_4									Capa4															SM_b21187	-	SM_b21187	NP_437393.1	276	COG0789	K	LacI family transcriptional regulator (plasmid)	5504		SM_b21187	18		SM_b21208	-	SM_b21208	NP_437414.2	240	COG1309	K	TetR family transcriptional regulator (plasmid)	5523		SM_b21208	13
RHE_RS14135	chr	-	RHE_RS14135	COG1522	K	Lrp/AsnC family transcriptional regulator	2719		RHE_RS14135	25		Level_5									Capa5			SMc03873	rpoH2	SMc03873	NP_387362.2	288	COG0568	K	RNA polymerase factor sigma-32	3274		SMc03873	19
RHE_RS00855	chr	phnF	RHE_RS00855	COG2188	K	phosphonate metabolism transcriptional regulator PhnF	161		RHE_RS00855	27		RHE_RS00415	chr	-	RHE_RS00415	COG1309	K	TetR/AcrR family transcriptional regulator	74		RHE_RS00415	31		SMc01945	-	SMc01945	NP_386585.1	138	COG1846	K	transcriptional regulator	2489		SMc01945	17		Level_4										Capa4
RHE_RS11740	chr	-	RHE_RS11740	COG1802	K	GntR family transcriptional regulator	2269		RHE_RS11740	27		RHE_RS03720	chr	rirA	RHE_RS03720	COG1959	K	transcriptional regulator	710		RHE_RS03720	26		SMc01762	-	SMc01762	NP_385306.1	111	COG0640	K	transcriptional regulator	1205		SMc01762	18		SMc00794	-	SMc00794	NP_384845.1	265	COG0784	T	two-component response regulator	741		SMc00794	9
RHE_RS25540	p42e	-	RHE_RS25540	COG1349	KG	DeoR/GlpR transcriptional regulator	4899		RHE_RS25540	27		RHE_RS00855	chr	phnF	RHE_RS00855	COG2188	K	phosphonate metabolism transcriptional regulator PhnF	161		RHE_RS00855	25															SM_b20457	-	SM_b20457	NP_436979.1	382	COG2207	K	transcriptional regulator transcription regulator protein (plasmid)	5090		SM_b20457	9
RHE_RS23775	p42c	-	RHE_RS23775	COG0583	K	LysR family transcriptional regulator	4556		RHE_RS23775	30		RHE_RS12775	chr	-	RHE_RS12775	COG0583	K	LysR family transcriptional regulator	2466		RHE_RS12775	27		Level_5										Capa5			SM_b20203	cbbR	SM_b20203	NP_436736.1	313	COG0583	K	transcriptional regulator (plasmid)	4846		SM_b20203	13
RHE_RS00185	chr	-	RHE_RS00185	COG0745	TK	DNA-binding response regulator	35		RHE_RS00185	47		RHE_RS03175	chr	-	RHE_RS03175	COG0745	TK	response regulator	605		RHE_RS03175	23		SM_b20004	gstR	SM_b20004	NP_436547.1	301	COG0583	K	gstR-like transcriptional regulator protein (plasmid)	4656		SM_b20004	14		SMc00095	betI	SMc00095	NP_385056.1	203	COG1309	K	transcriptional regulator BetI	953		SMc00095	9
RHE_RS16230	chr	-	RHE_RS16230	COG1846	K	ROK family transcriptional regulator	3123		RHE_RS16230	29		RHE_RS13750	chr	-	RHE_RS13750	COG3832	S	transcriptional regulator	2645		RHE_RS13750	20		SMc00241	-	SMc00241	NP_385772.1	249	COG2186	K	transcriptional regulator	1671		SMc00241	14		SM_b20901	-	SM_b20901	NP_437737.1	403	COG1846	K	transcriptional regulator (plasmid)	5846		SM_b20901	11
RHE_RS05330	chr	-	RHE_RS05330	COG0640	K	ArsR family transcriptional regulator	1025		RHE_RS05330	26		RHE_RS16230	chr	-	RHE_RS16230	COG1846	K	ROK family transcriptional regulator	3123		RHE_RS16230	21		SMc03820	-	SMc03820	NP_387309.1	227	COG0745	TK	transcriptional regulator	3220		SMc03820	15		SMc00241	-	SMc00241	NP_385772.1	249	COG2186	K	transcriptional regulator	1671		SMc00241	16
RHE_RS06875	chr	-	RHE_RS06875	COG1737	K	MurR/RpiR family transcriptional regulator	1324		RHE_RS06875	29		RHE_RS08025	chr	-	RHE_RS08025	COG0583	K	LysR family transcriptional regulator	1551		RHE_RS08025	20		SMa0748	-	SMa0748	NP_435644.2	149	COG4957	K	MucR family transcriptional regulator (plasmid)	3757		SMa0748	17		SMa2008	-	SMa2008	NP_436345.1	201	COG1309	K	transcriptional regulator (plasmid)	4457		SMa2008	12
RHE_RS14875	chr	-	RHE_RS14875	COG1802	K	GntR family transcriptional regulator	2863		RHE_RS14875	28		RHE_RS27645	p42f	-	RHE_RS27645	COG2186	K	FadR family transcriptional regulator	5316		RHE_RS27645	21		SM_b21021	-	SM_b21021	NP_437134.1	315	COG2390	K	transcriptional regulator (plasmid)	5247		SM_b21021	17		SM_b21598	-	SM_b21598	NP_437578.1	349	COG1609	K	transcriptional regulator (plasmid)	5687		SM_b21598	13
RHE_RS10580	chr	-	RHE_RS10580	COG1609	K	LacI family transcriptional regulator	2042		RHE_RS10580	23		RHE_RS06875	chr	-	RHE_RS06875	COG1737	K	MurR/RpiR family transcriptional regulator	1324		RHE_RS06875	26		SM_b20203	cbbR	SM_b20203	NP_436736.1	313	COG0583	K	transcriptional regulator (plasmid)	4846		SM_b20203	18		SMc02523	-	SMc02523	NP_387118.1	298	COG0583	K	transcriptional regulator	3022		SMc02523	16
RHE_RS20625	chr	-	RHE_RS20625	COG2188	K	GntR family transcriptional regulator	3978		RHE_RS20625	22		RHE_RS25970	p42e	-	RHE_RS25970	COG0662	G	XRE family transcriptional regulator	4985		RHE_RS25970	22		SMc02504	-	SMc02504	NP_387137.1	150	COG1522	K	transcriptional regulator	3041		SMc02504	15		SM_b21115	-	SM_b21115	NP_437234.1	162	COG3707	TK	response regulator protein (plasmid)	5347		SM_b21115	10
RHE_RS17595	chr	-	RHE_RS17595	COG0662	G	AraC family transcriptional regulator	3382		RHE_RS17595	24		RHE_RS02355	chr	-	RHE_RS02355	COG1846	K	ROK family transcriptional regulator	448		RHE_RS02355	30		SMc02523	-	SMc02523	NP_387118.1	298	COG0583	K	transcriptional regulator	3022		SMc02523	28		SMa0267	-	SMa0267	NP_435388.1	230	COG1802	K	GntR family transcriptional regulator (plasmid)	3505		SMa0267	11
RHE_RS25455	p42e	-	RHE_RS25455	COG0583	K	LysR family transcriptional regulator	4882		RHE_RS25455	24		RHE_RS17595	chr	-	RHE_RS17595	COG0662	G	AraC family transcriptional regulator	3382		RHE_RS17595	17		SM_b21115	-	SM_b21115	NP_437234.1	162	COG3707	TK	response regulator protein (plasmid)	5347		SM_b21115	19		SMc00329	irr	SMc00329	NP_384355.1	140	COG0735	P	iron response regulator protein	250		SMc00329	11
RHE_RS08350	chr	-	RHE_RS08350	COG0784	T	response regulator	1610		RHE_RS08350	22		RHE_RS06015	chr	-	RHE_RS06015	COG1846	K	MarR family transcriptional regulator	1151		RHE_RS06015	21		SMc00679	-	SMc00679	NP_386799.1	313	COG2207	K	transcriptional regulator	2702		SMc00679	17		SMa5030	-	SMa5030	YP_002000352.1	221	COG1309	K	TetR family transcriptional regulator (plasmid)	4091		SMa5030	14
												RHE_RS20575	chr	-	RHE_RS20575	COG1329	K	CarD family transcriptional regulator	3968		RHE_RS20575	18		SM_b21208	-	SM_b21208	NP_437414.2	240	COG1309	K	TetR family transcriptional regulator (plasmid)	5523		SM_b21208	18		SM_b21641	paaX	SM_b21641	NP_438100.1	306	COG3327	K	ArsR family transcriptional regulator (plasmid)	6208		SM_b21641	13
Level_5									Capa5			RHE_RS17050	chr	-	RHE_RS17050	COG0745	TK	DNA-binding response regulator	3281		RHE_RS17050	27		SMc03046	-	SMc03046	NP_384784.1	223	COG0745	TK	transcriptional regulator	680		SMc03046	18		SMc04203	fecI	SMc04203	NP_386137.1	159	COG1595	K	RNA polymerase sigma factor FECI protein	2039		SMc04203	11
RHE_RS06955	chr	-	RHE_RS06955	COG2197	TK	DNA-binding response regulator	1339		RHE_RS06955	24		RHE_RS22605	p42b	-	RHE_RS22605	COG1609	K	LacI family transcriptional regulator	4326		RHE_RS22605	17		SMc02984	-	SMc02984	NP_386982.1	297	COG0583	K	transcriptional regulator	2885		SMc02984	16
RHE_RS26280	p42e	-	RHE_RS26280	COG1414	K	IclR family transcriptional regulator	5047		RHE_RS26280	22																											Level_5										Capa5
RHE_RS18665	chr	-	RHE_RS18665	COG1879	G	LacI family DNA-binding transcriptional regulator	3594		RHE_RS18665	21		Level_6									Capa6			Level_6										Capa6			SMc00879	-	SMc00879	NP_384933.1	284	COG1414	K	transcriptional regulator	829		SMc00879	9
RHE_RS17090	chr	-	RHE_RS17090	COG0568	K	RNA polymerase sigma factor RpoH	3289		RHE_RS17090	22		RHE_RS02715	chr	-	RHE_RS02715	COG2197	TK	DNA-binding response regulator	516		RHE_RS02715	17		SMc01260	-	SMc01260	NP_385510.1	128	COG0789	K	transcriptional regulator	1409		SMc01260	12		SM_b20033	-	SM_b20033	NP_436576.1	220	COG1309	K	transcriptional regulator (plasmid)	4685		SM_b20033	8
RHE_RS18085	chr	-	RHE_RS18085	COG0583	K	LysR family transcriptional regulator	3479		RHE_RS18085	27		RHE_RS05330	chr	-	RHE_RS05330	COG0640	K	ArsR family transcriptional regulator	1025		RHE_RS05330	19		SMc00794	-	SMc00794	NP_384845.1	265	COG0784	T	two-component response regulator	741		SMc00794	17		SMc00820	-	SMc00820	NP_384871.1	316	COG0583	K	transcriptional regulator	767		SMc00820	9
RHE_RS01350	chr	-	RHE_RS01350	COG0583	K	LysR family transcriptional regulator	256		RHE_RS01350	23		RHE_RS05495	chr	-	RHE_RS05495	COG0640	K	ArsR family transcriptional regulator	1055		RHE_RS05495	22		SM_b20123	-	SM_b20123	NP_436663.1	298	COG0583	K	transcriptional regulator (plasmid)	4773		SM_b20123	14		SM_b20375	-	SM_b20375	NP_436901.1	256	COG2186	K	transcriptional regulator (plasmid)	5012		SM_b20375	9
RHE_RS28370	p42f	-	RHE_RS28370	COG1309	K	TetR/AcrR family transcriptional regulator	5460		RHE_RS28370	30		RHE_RS18970	chr	-	RHE_RS18970	COG1609	K	LacI family DNA-binding transcriptional regulator	3654		RHE_RS18970	16		SMc00820	-	SMc00820	NP_384871.1	316	COG0583	K	transcriptional regulator	767		SMc00820	12		SMc03820	-	SMc03820	NP_387309.1	227	COG0745	TK	transcriptional regulator	3220		SMc03820	11
RHE_RS03000	chr	-	RHE_RS03000	COG0583	K	LysR family transcriptional regulator	570		RHE_RS03000	24		RHE_RS20595	chr	-	RHE_RS20595	COG1846	K	MarR family transcriptional regulator	3972		RHE_RS20595	19		SMc02470	-	SMc02470	NP_387171.1	401	COG1846	K	transcriptional regulator	3075		SMc02470	21		SMc01495	smoC	SMc01495	NP_386552.1	317	COG2390	K	transcriptional regulator	2456		SMc01495	8
RHE_RS25725	p42e	-	RHE_RS25725	COG0583	K	LysR family transcriptional regulator	4936		RHE_RS25725	26		RHE_RS28160	p42f	-	RHE_RS28160	COG0583	K	LysR family transcriptional regulator	5419		RHE_RS28160	21		SMc00646	rpoH1	SMc00646	NP_386832.1	301	COG0568	K	RNA polymerase factor sigma-32	2735		SMc00646	15		SMc01615	-	SMc01615	NP_386333.1	261	COG1349	KG	transcriptional regulator	2236		SMc01615	11
RHE_RS01660	chr	-	RHE_RS01660	COG1522	K	Lrp/AsnC family transcriptional regulator	314		RHE_RS01660	25		RHE_RS24095	p42e	-	RHE_RS24095	COG1309	K	TetR/AcrR family transcriptional regulator	4618		RHE_RS24095	19		SMc04163	-	SMc04163	NP_386098.1	298	COG0583	K	transcriptional regulator	2000		SMc04163	14		SM_b20537	-	SM_b20537	NP_437056.1	342	COG1609	K	transcriptional regulator (plasmid)	5169		SM_b20537	12
RHE_RS23945	p42c	-	RHE_RS23945	COG1609	K	LacI family transcriptional regulator	4591		RHE_RS23945	24		RHE_RS12060	chr	-	RHE_RS12060	COG1879	G	LacI family transcriptional regulator	2331		RHE_RS12060	21		SM_b20758	-	SM_b20758	NP_437990.2	244	COG2188	K	ArsR family transcriptional regulator (plasmid)	6098		SM_b20758	18		SM_b21493	-	SM_b21493	NP_437862.1	153	COG1522	K	AsnC family transcriptional regulator (plasmid)	5971		SM_b21493	9
RHE_RS24980	p42e	-	RHE_RS24980	COG2207	K	AraC family transcriptional regulator	4794		RHE_RS24980	24		RHE_RS25540	p42e	-	RHE_RS25540	COG1349	KG	DeoR/GlpR transcriptional regulator	4899		RHE_RS25540	19		SMc02560	chvI	SMc02560	NP_384150.1	240	COG0745	TK	transcriptional regulator	44		SMc02560	18		SM_b20674	-	SM_b20674	NP_437921.1	339	COG1609	K	LacI family transcriptional regulator (plasmid)	6030		SM_b20674	9
RHE_RS17200	chr	-	RHE_RS17200	COG1959	K	Rrf2 family transcriptional regulator	3311		RHE_RS17200	28		RHE_RS03595	chr	-	RHE_RS03595	COG0583	K	LysR family transcriptional regulator	689		RHE_RS03595	22		SMc02584	actR	SMc02584	NP_384171.1	194	COG4567	TK	transcriptional regulator	65		SMc02584	15		SM_b21359	-	SM_b21359	NP_437475.1	152	COG0583	K	LysR family transcriptional regulator (plasmid)	5584		SM_b21359	10
RHE_RS12060	chr	-	RHE_RS12060	COG1879	G	LacI family transcriptional regulator	2331		RHE_RS12060	28		RHE_RS01660	chr	-	RHE_RS01660	COG1522	K	Lrp/AsnC family transcriptional regulator	314		RHE_RS01660	15		SMa0347	-	SMa0347	NP_435433.1	295	COG0583	K	LysR family transcriptional regulator (plasmid)	3550		SMa0347	13		SM_b21385	-	SM_b21385	NP_437503.1	311	COG2207	K	AraC family transcriptional regulator (plasmid)	5612		SM_b21385	10
RHE_RS28710	p42f	-	RHE_RS28710	COG1522	K	Lrp/AsnC family transcriptional regulator	5526		RHE_RS28710	27		RHE_RS18795	chr	-	RHE_RS18795	COG1737	K	MurR/RpiR family transcriptional regulator	3620		RHE_RS18795	18		SMc01403	-	SMc01403	NP_386186.1	154	COG1522	K	transcriptional regulator	2088		SMc01403	17		SMc01945	-	SMc01945	NP_386585.1	138	COG1846	K	transcriptional regulator	2489		SMc01945	9
RHE_RS06015	chr	-	RHE_RS06015	COG1846	K	MarR family transcriptional regulator	1151		RHE_RS06015	23		RHE_RS18760	chr	-	RHE_RS18760	COG2390	K	sugar-binding transcriptional regulator	3613		RHE_RS18760	19		SMc00558	-	SMc00558	NP_385234.1	285	COG2207	K	transcriptional regulator	1132		SMc00558	14		SMa0062	-	SMa0062	NP_435275.1	229	COG1802	K	GntR family transcriptional regulator (plasmid)	3390		SMa0062	9
RHE_RS05815	chr	-	RHE_RS05815	COG1309	K	transcriptional regulator BetI	1115		RHE_RS05815	19		RHE_RS24090	p42e	-	RHE_RS24090	COG3279	KT	response regulator	4617		RHE_RS24090	20		SM_b21484	rpoE5	SM_b21484	NP_437851.1	173	COG1595	K	RNA polymerase sigma-E factor (sigma-24) protein (plasmid)	5960		SM_b21484	14		SMa0065	-	SMa0065	NP_435278.1	230	COG1802	K	GntR family transcriptional regulator (plasmid)	3393		SMa0065	9
RHE_RS00380	chr	-	RHE_RS00380	COG1609	K	LacI family transcriptional regulator	67		RHE_RS00380	23		RHE_RS25580	p42e	-	RHE_RS25580	COG1414	K	IclR family transcriptional regulator	4907		RHE_RS25580	22		SMc01610	-	SMc01610	NP_386328.1	294	COG2207	K	transcriptional regulator	2231		SMc01610	13		SMc02030	-	SMc02030	NP_386648.1	301	COG0583	K	transcriptional regulator	2552		SMc02030	10
RHE_RS27240	p42f	-	RHE_RS27240	COG1733	K	transcriptional regulator	5239		RHE_RS27240	23		RHE_RS18235	chr	-	RHE_RS18235	COG0583	K	LysR family transcriptional regulator	3509		RHE_RS18235	16		SMc03150	-	SMc03150	NP_387049.1	237	COG2197	TK	transcriptional regulator	2952		SMc03150	14		SMc01610	-	SMc01610	NP_386328.1	294	COG2207	K	transcriptional regulator	2231		SMc01610	11
RHE_RS17305	chr	-	RHE_RS17305	COG0664	T	Crp/Fnr family transcriptional regulator	3332		RHE_RS17305	28														SMc04203	fecI	SMc04203	NP_386137.1	159	COG1595	K	RNA polymerase sigma factor FECI protein	2039		SMc04203	13		SMc02647	-	SMc02647	NP_385183.1	137	COG0640	K	transcriptional regulator	1081		SMc02647	9
												Level_7									Capa7			SMa1979	-	SMa1979	NP_436333.1	290	COG0583	K	LysR family transcriptional regulator (plasmid)	4446		SMa1979	15		SMc00479	-	SMc00479	NP_385899.1	338	COG2207	K	transcriptional regulator	1799		SMc00479	8
Level_6									Capa6			RHE_RS22030	p42b	-	RHE_RS22030	COG1309	K	TetR/AcrR family transcriptional regulator	4217		RHE_RS22030	19		SMc00098	-	SMc00098	NP_385067.1	158	COG1846	K	transcriptional regulator	964		SMc00098	17		SMc00490	-	SMc00490	NP_385883.1	472	COG1167	KE	transcriptional regulator	1783		SMc00490	8
RHE_RS18865	chr	-	RHE_RS18865	COG1309	K	TetR/AcrR family transcriptional regulator	3634		RHE_RS18865	20		RHE_RS28555	p42f	-	RHE_RS28555	COG1309	K	TetR/AcrR family transcriptional regulator	5497		RHE_RS28555	17		SMc00283	-	SMc00283	NP_385817.1	300	COG0583	K	transcriptional regulator	1716		SMc00283	15		SMc01406	-	SMc01406	NP_386191.1	472	COG1167	KE	transcriptional regulator	2093		SMc01406	8
RHE_RS25040	p42e	-	RHE_RS25040	COG4189	K	transcriptional regulator	4804		RHE_RS25040	26		RHE_RS06955	chr	-	RHE_RS06955	COG2197	TK	DNA-binding response regulator	1339		RHE_RS06955	19															SMc01762	-	SMc01762	NP_385306.1	111	COG0640	K	transcriptional regulator	1205		SMc01762	8
RHE_RS26495	p42f	-	RHE_RS26495	COG0583	K	LysR family transcriptional regulator	5089		RHE_RS26495	25		RHE_RS03610	chr	-	RHE_RS03610	COG1396	K	XRE family transcriptional regulator	692		RHE_RS03610	14		Level_7										Capa7
RHE_RS03610	chr	-	RHE_RS03610	COG1396	K	XRE family transcriptional regulator	692		RHE_RS03610	21		RHE_RS23915	p42c	-	RHE_RS23915	COG1309	K	TetR/AcrR family transcriptional regulator	4585		RHE_RS23915	16		SM_b20033	-	SM_b20033	NP_436576.1	220	COG1309	K	transcriptional regulator (plasmid)	4685		SM_b20033	13		Level_6										Capa6
RHE_RS15405	chr	-	RHE_RS15405	COG1846	K	MarR family transcriptional regulator	2965		RHE_RS15405	20		RHE_RS29195	p42f	-	RHE_RS29195	COG0745	TK	DNA-binding response regulator	5619		RHE_RS29195	15		SM_b20055	-	SM_b20055	NP_436595.1	329	COG4977	K	transcriptional regulator (plasmid)	4704		SM_b20055	13		SMc01260	-	SMc01260	NP_385510.1	128	COG0789	K	transcriptional regulator	1409		SMc01260	8
RHE_RS29775	p42d	-	RHE_RS29775			XRE family transcriptional regulator	5733		RHE_RS29775	21		RHE_RS23080	p42c	-	RHE_RS23080	COG1733	K	transcriptional regulator	4419		RHE_RS23080	17		SMc03060	aglR	SMc03060	NP_384800.1	356	COG1609	K	transcriptional regulator	696		SMc03060	11		SMc01092	-	SMc01092	NP_384535.1	296	COG0583	K	transcriptional regulator	430		SMc01092	7
RHE_RS29335	p42f	-	RHE_RS29335	COG3905	K	CopG family transcriptional regulator	5647		RHE_RS29335	21		RHE_RS25455	p42e	-	RHE_RS25455	COG0583	K	LysR family transcriptional regulator	4882		RHE_RS25455	16		SM_b20154	-	SM_b20154	NP_436694.1	328	COG1609	K	transcriptional regulator (plasmid)	4804		SM_b20154	15		SM_b21579	hmrR2	SM_b21579	NP_437559.1	147	COG0789	K	MerR family transcriptional regulator (plasmid)	5668		SM_b21579	8
RHE_RS04065	chr	-	RHE_RS04065	COG0583	K	LysR family transcriptional regulator	776		RHE_RS04065	19		RHE_RS02765	chr	-	RHE_RS02765	COG1959	K	Rrf2 family transcriptional regulator	526		RHE_RS02765	16		SM_b21222	-	SM_b21222	NP_437266.1	409	COG1940	KG	transcriptional regulator (plasmid)	5378		SM_b21222	14		SM_b20344	-	SM_b20344	NP_436870.1	318	COG4977	K	transcriptional regulator (plasmid)	4981		SM_b20344	8
RHE_RS04025	chr	-	RHE_RS04025	COG1309	K	TetR/AcrR family transcriptional regulator	768		RHE_RS04025	19		RHE_RS28370	p42f	-	RHE_RS28370	COG1309	K	TetR/AcrR family transcriptional regulator	5460		RHE_RS28370	16		SMc04348	-	SMc04348	NP_386175.1	215	COG1309	K	transcriptional regulator	2077		SMc04348	11		SM_b20347	-	SM_b20347	NP_436873.1	202	COG1309	K	transcriptional regulator (plasmid)	4984		SM_b20347	9
RHE_RS18970	chr	-	RHE_RS18970	COG1609	K	LacI family DNA-binding transcriptional regulator	3654		RHE_RS18970	25		RHE_RS23055	p42c	-	RHE_RS23055	COG1609	K	LacI family transcriptional regulator	4414		RHE_RS23055	15		SM_b20901	-	SM_b20901	NP_437737.1	403	COG1846	K	transcriptional regulator (plasmid)	5846		SM_b20901	19		SMc03123	-	SMc03123	NP_387076.1	315	COG2390	K	transcriptional regulator	2979		SMc03123	10
RHE_RS20595	chr	-	RHE_RS20595	COG1846	K	MarR family transcriptional regulator	3972		RHE_RS20595	20		RHE_RS23775	p42c	-	RHE_RS23775	COG0583	K	LysR family transcriptional regulator	4556		RHE_RS23775	15		SMc03890	-	SMc03890	NP_387379.1	260	COG1349	KG	transcriptional regulator	3291		SMc03890	14		SMa0789	-	SMa0789	NP_435671.2	231	COG1802	K	GntR family transcriptional regulator (plasmid)	3786		SMa0789	7
RHE_RS10220	chr	-	RHE_RS10220			XRE family transcriptional regulator	1969		RHE_RS10220	24		RHE_RS06025	chr	-	RHE_RS06025	COG1846	K	MarR family transcriptional regulator	1153		RHE_RS06025	16		SMc03123	-	SMc03123	NP_387076.1	315	COG2390	K	transcriptional regulator	2979		SMc03123	14		SM_b20426	-	SM_b20426	NP_436952.1	426	COG1167	KE	transcriptional regulator (plasmid)	5063		SM_b20426	6
RHE_RS23665	p42c	-	RHE_RS23665	COG1846	K	MarR family transcriptional regulator	4534		RHE_RS23665	21		RHE_RS29975	p42d	-	RHE_RS29975	COG1802	K	GntR family transcriptional regulator	5771		RHE_RS29975	15		SMa1749	-	SMa1749	NP_436210.1	299	COG2207	K	transcriptional regulator (plasmid)	4325		SMa1749	11		SM_b20455	-	SM_b20455	NP_436977.1	204	COG1309	K	transcriptional regulator (plasmid)	5088		SM_b20455	7
RHE_RS27645	p42f	-	RHE_RS27645	COG2186	K	FadR family transcriptional regulator	5316		RHE_RS27645	19		RHE_RS14875	chr	-	RHE_RS14875	COG1802	K	GntR family transcriptional regulator	2863		RHE_RS14875	21		SMa0097	-	SMa0097	NP_435295.1	313	COG0583	K	LysR family transcriptional regulator (plasmid)	3410		SMa0097	16		SMa1505	-	SMa1505	NP_436065.1	261	COG1802	K	GntR family transcriptional regulator (plasmid)	4183		SMa1505	7
RHE_RS29975	p42d	-	RHE_RS29975	COG1802	K	GntR family transcriptional regulator	5771		RHE_RS29975	21		RHE_RS04655	chr	-	RHE_RS04655	COG0583	K	LysR family transcriptional regulator	893		RHE_RS04655	16		SM_b20509	-	SM_b20509	NP_437031.1	255	COG2186	K	transcriptional regulator (plasmid)	5143		SM_b20509	13		SM_b20509	-	SM_b20509	NP_437031.1	255	COG2186	K	transcriptional regulator (plasmid)	5143		SM_b20509	8
RHE_RS20580	chr	-	RHE_RS20580	COG0568	K	RNA polymerase factor sigma-32	3969		RHE_RS20580	44		RHE_RS25725	p42e	-	RHE_RS25725	COG0583	K	LysR family transcriptional regulator	4936		RHE_RS25725	16		SMc01615	-	SMc01615	NP_386333.1	261	COG1349	KG	transcriptional regulator	2236		SMc01615	14		SM_b21102	-	SM_b21102	NP_437221.1	260	COG1414	K	transcriptional regulator (plasmid)	5334		SM_b21102	8
RHE_RS27935	p42f	-	RHE_RS27935	COG1846	K	ROK family transcriptional regulator	5375		RHE_RS27935	22		RHE_RS29335	p42f	-	RHE_RS29335	COG3905	K	CopG family transcriptional regulator	5647		RHE_RS29335	18		SM_b21493	-	SM_b21493	NP_437862.1	153	COG1522	K	AsnC family transcriptional regulator (plasmid)	5971		SM_b21493	16		SMc00953	-	SMc00953	NP_385751.1	309	COG2207	K	transcriptional regulator	1650		SMc00953	8
RHE_RS16100	chr	-	RHE_RS16100	COG0784	T	hybrid sensor histidine kinase/response regulator	3097		RHE_RS16100	28		RHE_RS10890	chr	-	RHE_RS10890	COG0745	TK	DNA-binding response regulator	2104		RHE_RS10890	21		SMc04315	-	SMc04315	NP_386076.1	282	COG0583	K	transcriptional regulator	1977		SMc04315	13		SM_b20683	-	SM_b20683	NP_437930.1	299	COG0583	K	LysR family transcriptional regulator (plasmid)	6039		SM_b20683	7
RHE_RS04315	chr	-	RHE_RS04315	COG2197	TK	LuxR family transcriptional regulator	826		RHE_RS04315	18		RHE_RS05815	chr	-	RHE_RS05815	COG1309	K	transcriptional regulator BetI	1115		RHE_RS05815	17		SM_b20683	-	SM_b20683	NP_437930.1	299	COG0583	K	LysR family transcriptional regulator (plasmid)	6039		SM_b20683	14		SMc00163	-	SMc00163	NP_385950.1	340	COG1879	G	transcriptional regulator	1850		SMc00163	11
RHE_RS14150	chr	-	RHE_RS14150	COG1309	K	TetR/AcrR family transcriptional regulator	2722		RHE_RS14150	18		RHE_RS11340	chr	-	RHE_RS11340	COG0789	K	MerR family DNA-binding transcriptional regulator	2191		RHE_RS11340	24		SM_b20722	-	SM_b20722	NP_437969.1	225	COG0745	TK	two-component response regulator protein (plasmid)	6077		SM_b20722	12		SM_b20859	-	SM_b20859	NP_437692.1	316	COG2207	K	AraC family transcriptional regulator (plasmid)	5801		SM_b20859	7
RHE_RS18760	chr	-	RHE_RS18760	COG2390	K	sugar-binding transcriptional regulator	3613		RHE_RS18760	21		RHE_RS05945	chr	-	RHE_RS05945	COG2197	TK	LuxR family transcriptional regulator	1137		RHE_RS05945	17		SMc02647	-	SMc02647	NP_385183.1	137	COG0640	K	transcriptional regulator	1081		SMc02647	9		SMc01592	-	SMc01592	NP_386442.1	158	COG1846	K	transcriptional regulator	2345		SMc01592	10
RHE_RS18795	chr	-	RHE_RS18795	COG1737	K	MurR/RpiR family transcriptional regulator	3620		RHE_RS18795	23														SMc04055	-	SMc04055	NP_386944.1	318	COG0583	K	transcriptional regulator	2847		SMc04055	12		SMc04032	-	SMc04032	NP_386921.1	260	COG2197	TK	transcriptional regulator	2824		SMc04032	8
RHE_RS09130	chr	-	RHE_RS09130	COG1609	K	LacI family DNA-binding transcriptional regulator	1759		RHE_RS09130	21		Level_8									Capa8			SMc01974	-	SMc01974	NP_386614.1	230	COG1802	K	transcriptional regulator	2518		SMc01974	14		SMa0347	-	SMa0347	NP_435433.1	295	COG0583	K	LysR family transcriptional regulator (plasmid)	3550		SMa0347	6
RHE_RS00285	chr	-	RHE_RS00285	COG4567	TK	DNA-binding response regulator	55		RHE_RS00285	19		RHE_RS06215	chr	-	RHE_RS06215	COG1609	K	LacI family DNA-binding transcriptional regulator	1192		RHE_RS06215	13		SMc02030	-	SMc02030	NP_386648.1	301	COG0583	K	transcriptional regulator	2552		SMc02030	18		SMc01403	-	SMc01403	NP_386186.1	154	COG1522	K	transcriptional regulator	2088		SMc01403	8
RHE_RS27415	p42f	-	RHE_RS27415	COG1522	K	Lrp/AsnC family transcriptional regulator	5272		RHE_RS27415	19		RHE_RS14135	chr	-	RHE_RS14135	COG1522	K	Lrp/AsnC family transcriptional regulator	2719		RHE_RS14135	18		SMc03122	-	SMc03122	NP_387077.1	315	COG0583	K	transcriptional regulator	2980		SMc03122	15		SMc02851	-	SMc02851	NP_384282.1	147	COG1846	K	transcriptional regulator	176		SMc02851	6
RHE_RS27920	p42f	-	RHE_RS27920	COG1309	K	TetR/AcrR family transcriptional regulator	5372		RHE_RS27920	18		RHE_RS15925	chr	-	RHE_RS15925	COG1695	K	PadR family transcriptional regulator	3063		RHE_RS15925	15		SMc03165	-	SMc03165	NP_387002.1	345	COG1879	G	transcriptional regulator	2905		SMc03165	11		SM_b21372	-	SM_b21372	NP_437490.1	352	COG1609	K	LacI family transcriptional regulator (plasmid)	5599		SM_b21372	8
RHE_RS25060	p42e	-	RHE_RS25060	COG1414	K	IclR family transcriptional regulator	4808		RHE_RS25060	19		RHE_RS26280	p42e	-	RHE_RS26280	COG1414	K	IclR family transcriptional regulator	5047		RHE_RS26280	14		SMa1207	-	SMa1207	NP_435903.2	226	COG0664	T	Crp family transcriptional regulator (plasmid)	4020		SMa1207	12		SMa0372	-	SMa0372	NP_435446.1	299	COG0583	K	LysR family transcriptional regulator (plasmid)	3561		SMa0372	7
RHE_RS13965	chr	-	RHE_RS13965	COG1846	K	MarR family transcriptional regulator	2686		RHE_RS13965	19		RHE_RS28695	p42f	-	RHE_RS28695	COG2207	K	AraC family transcriptional regulator	5523		RHE_RS28695	14		SMc01225	-	SMc01225	NP_385672.1	302	COG0583	K	transcriptional regulator	1571		SMc01225	13		SMa1632	-	SMa1632	NP_436136.1	317	COG0583	K	LysR family transcriptional regulator (plasmid)	4255		SMa1632	8
RHE_RS24735	p42e	-	RHE_RS24735	COG0640	K	ArsR family transcriptional regulator	4747		RHE_RS24735	19		RHE_RS00340	chr	-	RHE_RS00340	COG2197	TK	DNA-binding response regulator	59		RHE_RS00340	16		SMc00490	-	SMc00490	NP_385883.1	472	COG1167	KE	transcriptional regulator	1783		SMc00490	11		SMa1688	-	SMa1688	NP_436173.1	138	COG4566	TK	Two-component response regulator (plasmid)	4292		SMa1688	9
												RHE_RS18665	chr	-	RHE_RS18665	COG1879	G	LacI family DNA-binding transcriptional regulator	3594		RHE_RS18665	14		SMc00275	-	SMc00275	NP_385809.1	324	COG0583	K	transcriptional regulator	1708		SMc00275	13		SMc00146	-	SMc00146	NP_385968.1	163	COG1846	K	transcriptional regulator	1868		SMc00146	7
Level_7									Capa7			RHE_RS24620	p42e	-	RHE_RS24620	COG1802	K	GntR family transcriptional regulator	4723		RHE_RS24620	17		SMc00458	feuP	SMc00458	NP_385120.1	223	COG0745	TK	transcriptional regulator	1017		SMc00458	16		SMc03092	-	SMc03092	NP_387107.1	144	COG1522	K	transcriptional regulator	3010		SMc03092	6
RHE_RS06845	chr	-	RHE_RS06845	COG2169	L	AraC family transcriptional regulator	1318		RHE_RS06845	17		RHE_RS25595	p42e	-	RHE_RS25595	COG5631	K	transcriptional regulator	4910		RHE_RS25595	21		SMc01787	-	SMc01787	NP_385331.1	176	COG0789	K	transcriptional regulator	1230		SMc01787	11		SMc04264	-	SMc04264	NP_386040.1	296	COG2207	K	transcriptional regulator	1941		SMc04264	10
RHE_RS03515	chr	-	RHE_RS03515	COG1609	K	LacI family transcriptional regulator	673		RHE_RS03515	17		RHE_RS20060	chr	-	RHE_RS20060	COG0583	K	LysR family transcriptional regulator	3863		RHE_RS20060	19		SMc00929	-	SMc00929	NP_384925.1	326	COG0583	K	transcriptional regulator	821		SMc00929	13
RHE_RS10920	chr	-	RHE_RS10920	COG1846	K	transcriptional regulator	2110		RHE_RS10920	19		RHE_RS02340	chr	-	RHE_RS02340			TetR/AcrR family transcriptional regulator	445		RHE_RS02340	14		SMc02366	-	SMc02366	NP_385128.1	233	COG0745	TK	transcriptional regulator	1025		SMc02366	18		Level_7										Capa7
RHE_RS07685	chr	-	RHE_RS07685	COG1846	K	MarR family transcriptional regulator	1487		RHE_RS07685	23		RHE_RS26680	p42f	-	RHE_RS26680	COG1595	K	RNA polymerase sigma factor	5126		RHE_RS26680	15		SMc04011	tacA	SMc04011	NP_386901.1	513	COG2204	T	sigma-54-dependent transcription regulator protein	2804		SMc04011	13		SM_b20004	gstR	SM_b20004	NP_436547.1	301	COG0583	K	gstR-like transcriptional regulator protein (plasmid)	4656		SM_b20004	7
RHE_RS12670	chr	-	RHE_RS12670	COG0664	T	Crp/Fnr family transcriptional regulator	2445		RHE_RS12670	18		RHE_RS19030	chr	-	RHE_RS19030	COG3284	K	sigma-54-dependent Fis family transcriptional regulator	3666		RHE_RS19030	16		SMc04109	cpaE1	SMc04109	NP_384249.1	428	COG4963	UW	response regulator protein	143		SMc04109	14		SM_b20154	-	SM_b20154	NP_436694.1	328	COG1609	K	transcriptional regulator (plasmid)	4804		SM_b20154	5
RHE_RS26680	p42f	-	RHE_RS26680	COG1595	K	RNA polymerase sigma factor	5126		RHE_RS26680	16		RHE_RS27525	p42f	-	RHE_RS27525	COG1609	K	LacI family DNA-binding transcriptional regulator	5294		RHE_RS27525	15															SM_b21346	-	SM_b21346	NP_437462.1	350	COG1609	K	LacI family transcriptional regulator (plasmid)	5571		SM_b21346	9
RHE_RS13180	chr	-	RHE_RS13180	COG0745	TK	DNA-binding response regulator	2542		RHE_RS13180	22		RHE_RS26015	p42e	-	RHE_RS26015	COG1309	K	TetR/AcrR family transcriptional regulator	4993		RHE_RS26015	15		Level_8										Capa8			SMc04348	-	SMc04348	NP_386175.1	215	COG1309	K	transcriptional regulator	2077		SMc04348	8
RHE_RS23180	p42c	-	RHE_RS23180	COG2207	K	AraC family transcriptional regulator	4437		RHE_RS23180	16		RHE_RS23180	p42c	-	RHE_RS23180	COG2207	K	AraC family transcriptional regulator	4437		RHE_RS23180	13		SMa1602	-	SMa1602	NP_436119.2	291	COG0583	K	LysR family transcriptional regulator (plasmid)	4237		SMa1602	13		SM_b20276	-	SM_b20276	NP_436806.1	296	COG1737	K	transcriptional regulator (plasmid)	4917		SM_b20276	6
RHE_RS23520	p42c	-	RHE_RS23520			XRE family transcriptional regulator	4504		RHE_RS23520	19		RHE_RS12585	chr	-	RHE_RS12585	COG1609	K	LacI family DNA-binding transcriptional regulator	2429		RHE_RS12585	14		SM_b20021	-	SM_b20021	NP_436564.1	156	COG1522	K	transcriptional regulator (plasmid)	4673		SM_b20021	10		SMa1954	-	SMa1954	NP_436316.1	327	COG0583	K	LysR family transcriptional regulator (plasmid)	4429		SMa1954	5
RHE_RS26790	p42f	-	RHE_RS26790	COG0664	T	transcriptional regulator	5147		RHE_RS26790	23		RHE_RS07835	chr	-	RHE_RS07835	COG0784	T	response regulator	1517		RHE_RS07835	13		SMc04260	-	SMc04260	NP_386036.1	356	COG1609	K	transcriptional regulator	1937		SMc04260	10		SMc01651	-	SMc01651	NP_386369.1	302	COG0583	K	transcriptional regulator	2272		SMc01651	6
RHE_RS08025	chr	-	RHE_RS08025	COG0583	K	LysR family transcriptional regulator	1551		RHE_RS08025	18		RHE_RS27920	p42f	-	RHE_RS27920	COG1309	K	TetR/AcrR family transcriptional regulator	5372		RHE_RS27920	14		SM_b20048	-	SM_b20048	NP_436591.1	235	COG2188	K	transcriptional regulator (plasmid)	4700		SM_b20048	10		SM_b20366	-	SM_b20366	NP_436892.1	334	COG1609	K	LacI family transcriptional regulator (plasmid)	5003		SM_b20366	5
RHE_RS26015	p42e	-	RHE_RS26015	COG1309	K	TetR/AcrR family transcriptional regulator	4993		RHE_RS26015	19		RHE_RS24980	p42e	-	RHE_RS24980	COG2207	K	AraC family transcriptional regulator	4794		RHE_RS24980	16		SMc00058	mucR	SMc00058	NP_385105.1	143	COG4957	K	transcriptional regulator	1002		SMc00058	11		SM_b20367	-	SM_b20367	NP_436893.1	230	COG1309	K	transcriptional regulator (plasmid)	5004		SM_b20367	4
RHE_RS00725	chr	-	RHE_RS00725	COG1476	K	XRE family transcriptional regulator	135		RHE_RS00725	21														SMc00654	ctrA	SMc00654	NP_386824.1	233	COG0745	TK	response regulator,controls chromosomal replication initiation protein	2727		SMc00654	13		SMa1966	-	SMa1966	NP_436324.1	369	COG0583	K	LysR family transcriptional regulator (plasmid)	4437		SMa1966	5
RHE_RS25970	p42e	-	RHE_RS25970	COG0662	G	XRE family transcriptional regulator	4985		RHE_RS25970	21		Level_9									Capa9			SMc04220	-	SMc04220	NP_385996.1	105	COG0640	K	transcriptional regulator	1896		SMc04220	10		SMa1749	-	SMa1749	NP_436210.1	299	COG2207	K	transcriptional regulator (plasmid)	4325		SMa1749	8
RHE_RS29205	p42f	-	RHE_RS29205	COG4566	TK	DNA-binding response regulator	5621		RHE_RS29205	16		RHE_RS04575	chr	-	RHE_RS04575	COG1733	K	transcriptional regulator	877		RHE_RS04575	14		SMa2215	-	SMa2215	NP_436441.1	255	COG2188	K	GntR family transcriptional regulator (plasmid)	4553		SMa2215	9		SM_b21299	deoR	SM_b21299	NP_437343.1	263	COG1349	KG	DeoR family transcriptional regulator (plasmid)	5454		SM_b21299	5
RHE_RS28045	p42f	-	RHE_RS28045	COG0745	TK	DNA-binding response regulator	5396		RHE_RS28045	18		RHE_RS18865	chr	-	RHE_RS18865	COG1309	K	TetR/AcrR family transcriptional regulator	3634		RHE_RS18865	10		SM_b21346	-	SM_b21346	NP_437462.1	350	COG1609	K	LacI family transcriptional regulator (plasmid)	5571		SM_b21346	13		SMa0097	-	SMa0097	NP_435295.1	313	COG0583	K	LysR family transcriptional regulator (plasmid)	3410		SMa0097	6
RHE_RS10890	chr	-	RHE_RS10890	COG0745	TK	DNA-binding response regulator	2104		RHE_RS10890	19		RHE_RS20285	chr	-	RHE_RS20285	COG0745	TK	DNA-binding response regulator	3910		RHE_RS20285	16		SMc01908	-	SMc01908	NP_385366.1	157	COG1846	K	transcriptional regulator	1265		SMc01908	12		SMc02893	-	SMc02893	NP_384324.1	308	COG0583	K	transcriptional regulator	219		SMc02893	6
RHE_RS02600	chr	phoB	RHE_RS02600	COG0745	TK	phosphate regulon transcriptional regulatory protein PhoB	496		RHE_RS02600	17		RHE_RS32675	p42d	-	RHE_RS32675	COG1396	K	XRE family transcriptional regulator	5881		RHE_RS32675	12		SM_b20457	-	SM_b20457	NP_436979.1	382	COG2207	K	transcriptional regulator transcription regulator protein (plasmid)	5090		SM_b20457	12		SM_b20896	gbpR	SM_b20896	NP_437730.1	302	COG0583	K	LysR family transcriptional regulator (plasmid)	5839		SM_b20896	7
RHE_RS20060	chr	-	RHE_RS20060	COG0583	K	LysR family transcriptional regulator	3863		RHE_RS20060	17		RHE_RS06105	chr	-	RHE_RS06105	COG0583	K	LysR family transcriptional regulator	1170		RHE_RS06105	11		SM_b21080	-	SM_b21080	NP_437199.1	274	COG2197	TK	response regulator protein (plasmid)	5312		SM_b21080	10		SM_b20531	-	SM_b20531	NP_437050.1	178	COG1595	K	RNA polymerase sigma factor (plasmid)	5163		SM_b20531	7
RHE_RS02355	chr	-	RHE_RS02355	COG1846	K	ROK family transcriptional regulator	448		RHE_RS02355	35		RHE_RS22460	p42b	-	RHE_RS22460	COG2197	TK	LuxR family transcriptional regulator	4298		RHE_RS22460	14		SM_b21359	-	SM_b21359	NP_437475.1	152	COG0583	K	LysR family transcriptional regulator (plasmid)	5584		SM_b21359	15		SM_b20586	-	SM_b20586	NP_438038.1	251	COG1414	K	IclR family transcriptional regulator (plasmid)	6146		SM_b20586	6
RHE_RS13750	chr	-	RHE_RS13750	COG3832	S	transcriptional regulator	2645		RHE_RS13750	18		RHE_RS06825	chr	-	RHE_RS06825	COG0583	K	LysR family transcriptional regulator	1314		RHE_RS06825	14		SM_b20219	-	SM_b20219	NP_436752.1	245	COG0745	TK	response regulator protein (plasmid)	4862		SM_b20219	9		SM_b20608	-	SM_b20608	NP_438060.1	112	COG0640	K	ArsR family transcriptional regulator (plasmid)	6168		SM_b20608	9
RHE_RS11340	chr	-	RHE_RS11340	COG0789	K	MerR family DNA-binding transcriptional regulator	2191		RHE_RS11340	20		RHE_RS23520	p42c	-	RHE_RS23520			XRE family transcriptional regulator	4504		RHE_RS23520	13		SM_b20258	-	SM_b20258	NP_436788.1	236	COG1802	K	transcriptional regulator (plasmid)	4899		SM_b20258	13		SM_b20817	-	SM_b20817	NP_437097.1	343	COG1879	G	LacI family transcriptional regulator (plasmid)	5210		SM_b20817	7
RHE_RS05255	chr	-	RHE_RS05255	COG1974	KT	transcriptional regulator	1010		RHE_RS05255	17		RHE_RS10220	chr	-	RHE_RS10220			XRE family transcriptional regulator	1969		RHE_RS10220	19		SM_b20347	-	SM_b20347	NP_436873.1	202	COG1309	K	transcriptional regulator (plasmid)	4984		SM_b20347	12		SMc03890	-	SMc03890	NP_387379.1	260	COG1349	KG	transcriptional regulator	3291		SMc03890	8
RHE_RS18560	chr	-	RHE_RS18560	COG0583	K	LysR family transcriptional regulator	3574		RHE_RS18560	20		RHE_RS28900	p42f	-	RHE_RS28900	COG0583	K	LysR family transcriptional regulator	5564		RHE_RS28900	16		SMa0303	-	SMa0303	NP_435410.1	292	COG0583	K	LysR family transcriptional regulator (plasmid)	3526		SMa0303	12		SM_b21464	-	SM_b21464	NP_437830.1	257	COG2188	K	GntR family transcriptional regulator (plasmid)	5939		SM_b21464	6
												RHE_RS21205	p42a	-	RHE_RS21205	COG2390	K	sugar-binding transcriptional regulator	4088		RHE_RS21205	16		SMc02184	-	SMc02184	NP_384602.1	89	COG1396	K	transcriptional regulator	497		SMc02184	9		SM_b21336	-	SM_b21336	NP_437452.1	314	COG2207	K	AraC family transcriptional regulator (plasmid)	5561		SM_b21336	6
Level_8									Capa8			RHE_RS10545	chr	-	RHE_RS10545	COG2186	K	FadR family transcriptional regulator	2035		RHE_RS10545	12		SMc00829	-	SMc00829	NP_384880.1	275	COG2186	K	transcriptional regulator	776		SMc00829	13		SM_b20722	-	SM_b20722	NP_437969.1	225	COG0745	TK	two-component response regulator protein (plasmid)	6077		SM_b20722	12
RHE_RS03210	chr	-	RHE_RS03210	COG1396	K	XRE family transcriptional regulator	612		RHE_RS03210	15		RHE_RS03180	chr	-	RHE_RS03180	COG2197	TK	helix-turn-helix transcriptional regulator	606		RHE_RS03180	12		SM_b20455	-	SM_b20455	NP_436977.1	204	COG1309	K	transcriptional regulator (plasmid)	5088		SM_b20455	7		SM_b20869	-	SM_b20869	NP_437703.1	233	COG4566	TK	two-component response regulator protein (plasmid)	5812		SM_b20869	8
RHE_RS16340	chr	-	RHE_RS16340	COG0583	K	LysR family transcriptional regulator	3143		RHE_RS16340	18		RHE_RS16205	chr	-	RHE_RS16205	COG0583	K	LysR family transcriptional regulator	3118		RHE_RS16205	18		SM_b21008	-	SM_b21008	NP_437674.1	110	COG0640	K	ArsR family transcriptional regulator (plasmid)	5783		SM_b21008	9		SM_b20947	exoX	SM_b20947	NP_437610.1	98			posttranscriptional regulator, repressor protein (plasmid)	5719		SM_b20947	9
RHE_RS32675	p42d	-	RHE_RS32675	COG1396	K	XRE family transcriptional regulator	5881		RHE_RS32675	19		RHE_RS29775	p42d	-	RHE_RS29775			XRE family transcriptional regulator	5733		RHE_RS29775	15		SM_b20531	-	SM_b20531	NP_437050.1	178	COG1595	K	RNA polymerase sigma factor (plasmid)	5163		SM_b20531	12		SM_b21021	-	SM_b21021	NP_437134.1	315	COG2390	K	transcriptional regulator (plasmid)	5247		SM_b21021	5
RHE_RS23835	p42c	-	RHE_RS23835	COG1609	K	LacI family transcriptional regulator	4568		RHE_RS23835	17		RHE_RS24540	p42e	-	RHE_RS24540	COG1802	K	GntR family transcriptional regulator	4708		RHE_RS24540	13		SM_b20537	-	SM_b20537	NP_437056.1	342	COG1609	K	transcriptional regulator (plasmid)	5169		SM_b20537	13		SMa1442	-	SMa1442	NP_436034.1	254	COG2186	K	GntR family transcriptional regulator (plasmid)	4151		SMa1442	6
RHE_RS16825	chr	-	RHE_RS16825	COG1309	K	TetR family transcriptional regulator	3236		RHE_RS16825	17		RHE_RS27930	p42f	-	RHE_RS27930	COG4977	K	AraC family transcriptional regulator	5374		RHE_RS27930	13		SMc01975	-	SMc01975	NP_386615.1	238	COG2186	K	transcriptional regulator	2519		SMc01975	10		SM_b21535	-	SM_b21535	NP_437515.1	289	COG0583	K	LysR family transcriptional regulator (plasmid)	5624		SM_b21535	7
RHE_RS18520	chr	-	RHE_RS18520	COG1609	K	LacI family transcriptional regulator	3566		RHE_RS18520	21		RHE_RS17200	chr	-	RHE_RS17200	COG1959	K	Rrf2 family transcriptional regulator	3311		RHE_RS17200	15		SM_b20674	-	SM_b20674	NP_437921.1	339	COG1609	K	LacI family transcriptional regulator (plasmid)	6030		SM_b20674	14		SMa0520	-	SMa0520	NP_435520.1	280	COG1737	K	RpiR family transcriptional regulator (plasmid)	3635		SMa0520	4
RHE_RS16415	chr	-	RHE_RS16415	COG1396	K	XRE family transcriptional regulator	3157		RHE_RS16415	23		RHE_RS03000	chr	-	RHE_RS03000	COG0583	K	LysR family transcriptional regulator	570		RHE_RS03000	14		SMa1720	-	SMa1720	NP_436191.1	314	COG0583	K	LysR family transcriptional regulator (plasmid)	4307		SMa1720	9		SM_b21569	-	SM_b21569	NP_437549.1	199	COG1917	R	transcriptional regulator (plasmid)	5658		SM_b21569	7
RHE_RS02835	chr	-	RHE_RS02835	COG1846	K	MarR family transcriptional regulator	540		RHE_RS02835	14		RHE_RS15405	chr	-	RHE_RS15405	COG1846	K	MarR family transcriptional regulator	2965		RHE_RS15405	12		SM_b20935	exsI	SM_b20935	NP_437598.1	83	COG1396	K	transcriptional regulator (plasmid)	5707		SM_b20935	9		SMc01225	-	SMc01225	NP_385672.1	302	COG0583	K	transcriptional regulator	1571		SMc01225	7
RHE_RS13295	chr	-	RHE_RS13295	COG2207	K	AraC family transcriptional regulator	2561		RHE_RS13295	19		RHE_RS28710	p42f	-	RHE_RS28710	COG1522	K	Lrp/AsnC family transcriptional regulator	5526		RHE_RS28710	15		SMc02323	-	SMc02323	NP_384735.1	270	COG1349	KG	transcriptional regulator	631		SMc02323	11		SMc02366	-	SMc02366	NP_385128.1	233	COG0745	TK	transcriptional regulator	1025		SMc02366	9
RHE_RS09025	chr	-	RHE_RS09025	COG0583	K	LysR family transcriptional regulator	1739		RHE_RS09025	15		RHE_RS10425	chr	-	RHE_RS10425	COG1846	K	MarR family transcriptional regulator	2010		RHE_RS10425	14		SMc04032	-	SMc04032	NP_386921.1	260	COG2197	TK	transcriptional regulator	2824		SMc04032	11		SMc03258	-	SMc03258	NP_387217.1	230	COG1802	K	transcriptional regulator	3122		SMc03258	6
RHE_RS16800	chr	-	RHE_RS16800	COG4977	K	transcriptional regulator FtrA	3232		RHE_RS16800	19		RHE_RS26795	p42f	-	RHE_RS26795	COG0784	T	response regulator	5148		RHE_RS26795	13		SM_b21372	-	SM_b21372	NP_437490.1	352	COG1609	K	LacI family transcriptional regulator (plasmid)	5599		SM_b21372	9		SMa0063	-	SMa0063	NP_435276.2	244	COG2186	K	GntR family transcriptional regulator (plasmid)	3391		SMa0063	9
RHE_RS24540	p42e	-	RHE_RS24540	COG1802	K	GntR family transcriptional regulator	4708		RHE_RS24540	20		RHE_RS01350	chr	-	RHE_RS01350	COG0583	K	LysR family transcriptional regulator	256		RHE_RS01350	20		SM_b21569	-	SM_b21569	NP_437549.1	199	COG1917	R	transcriptional regulator (plasmid)	5658		SM_b21569	10		SMa0246	-	SMa0246	NP_435376.2	236	COG2186	K	GntR family transcriptional regulator (plasmid)	3493		SMa0246	9
RHE_RS30745	p42d	-	RHE_RS30745			transcriptional regulator	5912		RHE_RS30745	15		RHE_RS25605	p42e	-	RHE_RS25605	COG1309	K	TetR/AcrR family transcriptional regulator	4912		RHE_RS25605	16		SMc00107	-	SMc00107	NP_385080.1	237	COG2378	K	transcriptional regulator	977		SMc00107	10		SMa0815	nifA	SMa0815	NP_435689.2	541	COG3604	KT	Fis family transcriptional regulator (plasmid)	3803		SMa0815	8
RHE_RS18525	chr	-	RHE_RS18525	COG1846	K	MarR family transcriptional regulator	3567		RHE_RS18525	15		RHE_RS27415	p42f	-	RHE_RS27415	COG1522	K	Lrp/AsnC family transcriptional regulator	5272		RHE_RS27415	15		SM_b21576	-	SM_b21576	NP_437556.1	121	COG0640	K	ArsR family transcriptional regulator (plasmid)	5665		SM_b21576	13		SMc04162	-	SMc04162	NP_386097.1	109	COG0640	K	transcriptional regulator	1999		SMc04162	5
RHE_RS16205	chr	-	RHE_RS16205	COG0583	K	LysR family transcriptional regulator	3118		RHE_RS16205	18		RHE_RS06535	chr	-	RHE_RS06535	COG0583	K	LysR family transcriptional regulator	1255		RHE_RS06535	14		SMc01768	-	SMc01768	NP_385312.1	170	COG1846	K	transcriptional regulator	1211		SMc01768	11		SMa0985	-	SMa0985	NP_435777.2	281	COG0583	K	LysR family transcriptional regulator (plasmid)	3895		SMa0985	5
RHE_RS12460	chr	-	RHE_RS12460	COG1522	K	Lrp/AsnC family transcriptional regulator	2405		RHE_RS12460	21														SMc03258	-	SMc03258	NP_387217.1	230	COG1802	K	transcriptional regulator	3122		SMc03258	9		SMa1454	-	SMa1454	NP_436039.2	347	COG2207	K	AraC family transcriptional regulator (plasmid)	4156		SMa1454	6
RHE_RS19030	chr	-	RHE_RS19030	COG3284	K	sigma-54-dependent Fis family transcriptional regulator	3666		RHE_RS19030	21		Level_10									Capa10			SMa0281	-	SMa0281	NP_435397.1	134	COG0789	K	MerR family transcriptional regulator (plasmid)	3514		SMa0281	10		SMa1480	-	SMa1480	NP_436052.2	295	COG0583	K	LysR family transcriptional regulator (plasmid)	4169		SMa1480	7
RHE_RS20825	chr	-	RHE_RS20825	COG2005	K	LysR family transcriptional regulator	4017		RHE_RS20825	17		RHE_RS23835	p42c	-	RHE_RS23835	COG1609	K	LacI family transcriptional regulator	4568		RHE_RS23835	12		SMc01406	-	SMc01406	NP_386191.1	472	COG1167	KE	transcriptional regulator	2093		SMc01406	13		SMa2303	-	SMa2303	NP_436486.1	408	COG1940	KG	ROK family transcriptional regulator (plasmid)	4593		SMa2303	6
RHE_RS00765	chr	-	RHE_RS00765	COG1846	K	MarR family transcriptional regulator	143		RHE_RS00765	18		RHE_RS03515	chr	-	RHE_RS03515	COG1609	K	LacI family transcriptional regulator	673		RHE_RS03515	15		SMc03998	-	SMc03998	NP_386888.1	86	COG0640	K	transcriptional regulator	2791		SMc03998	12		SMc00275	-	SMc00275	NP_385809.1	324	COG0583	K	transcriptional regulator	1708		SMc00275	7
RHE_RS02855	chr	-	RHE_RS02855	COG1309	K	TetR family transcriptional regulator	544		RHE_RS02855	20		RHE_RS16825	chr	-	RHE_RS16825	COG1309	K	TetR family transcriptional regulator	3236		RHE_RS16825	12		SMc00479	-	SMc00479	NP_385899.1	338	COG2207	K	transcriptional regulator	1799		SMc00479	14		SMc03170	-	SMc03170	NP_387007.1	279	COG2207	K	transcriptional regulator	2910		SMc03170	3
RHE_RS14210	chr	-	RHE_RS14210	COG1959	K	Rrf2 family transcriptional regulator	2734		RHE_RS14210	16		RHE_RS28890	p42f	-	RHE_RS28890	COG1309	K	TetR family transcriptional regulator	5562		RHE_RS28890	11		SMc01504	-	SMc01504	NP_386543.1	264	COG0784	T	two-component response regulator	2447		SMc01504	15		SMc04011	tacA	SMc04011	NP_386901.1	513	COG2204	T	sigma-54-dependent transcription regulator protein	2804		SMc04011	5
RHE_RS29200	p42f	-	RHE_RS29200	COG3710	K	LuxR family transcriptional regulator	5620		RHE_RS29200	15		RHE_RS29200	p42f	-	RHE_RS29200	COG3710	K	LuxR family transcriptional regulator	5620		RHE_RS29200	11		SMc01269	-	SMc01269	NP_385501.1	132	COG1396	K	transcriptional regulator	1400		SMc01269	12		SMc04055	-	SMc04055	NP_386944.1	318	COG0583	K	transcriptional regulator	2847		SMc04055	5
RHE_RS07835	chr	-	RHE_RS07835	COG0784	T	response regulator	1517		RHE_RS07835	15		RHE_RS07480	chr	-	RHE_RS07480	COG1309	K	TetR/AcrR family transcriptional regulator	1446		RHE_RS07480	18		SMc02596	-	SMc02596	NP_384183.1	283	COG0583	K	transcriptional regulator	77		SMc02596	9		SMc04109	cpaE1	SMc04109	NP_384249.1	428	COG4963	UW	response regulator protein	143		SMc04109	7
RHE_RS06535	chr	-	RHE_RS06535	COG0583	K	LysR family transcriptional regulator	1255		RHE_RS06535	17		RHE_RS28010	p42f	-	RHE_RS28010	COG1609	K	LacI family transcriptional regulator	5390		RHE_RS28010	9															SMc04143	-	SMc04143	NP_384215.1	240	COG2186	K	transcriptional regulator	109		SMc04143	7
RHE_RS02715	chr	-	RHE_RS02715	COG2197	TK	DNA-binding response regulator	516		RHE_RS02715	17		RHE_RS18560	chr	-	RHE_RS18560	COG0583	K	LysR family transcriptional regulator	3574		RHE_RS18560	13		Level_9										Capa9
RHE_RS05915	chr	-	RHE_RS05915	COG0583	K	LysR family transcriptional regulator	1132		RHE_RS05915	15		RHE_RS04310	chr	-	RHE_RS04310	COG1414	K	IclR family transcriptional regulator	825		RHE_RS04310	11		SMc00879	-	SMc00879	NP_384933.1	284	COG1414	K	transcriptional regulator	829		SMc00879	10		Level_8										Capa8
RHE_RS09045	chr	-	RHE_RS09045	COG1522	K	Lrp/AsnC family transcriptional regulator	1742		RHE_RS09045	19		RHE_RS19695	chr	-	RHE_RS19695	COG1522	K	Lrp/AsnC family transcriptional regulator	3791		RHE_RS19695	13		SM_b21559	-	SM_b21559	NP_437539.1	296	COG2207	K	AraC family transcriptional regulator (plasmid)	5648		SM_b21559	11		SM_b20106	-	SM_b20106	NP_436646.1	243	COG2186	K	transcriptional regulator (plasmid)	4756		SM_b20106	5
RHE_RS24620	p42e	-	RHE_RS24620	COG1802	K	GntR family transcriptional regulator	4723		RHE_RS24620	21		RHE_RS28020	p42f	-	RHE_RS28020	COG2186	K	FadR family transcriptional regulator	5391		RHE_RS28020	14		SMc01592	-	SMc01592	NP_386442.1	158	COG1846	K	transcriptional regulator	2345		SMc01592	9		SMc00785	rirA	SMc00785	NP_384836.1	154	COG1959	K	iron-responsive transcriptional regulator	732		SMc00785	6
RHE_RS25595	p42e	-	RHE_RS25595	COG5631	K	transcriptional regulator	4910		RHE_RS25595	30		RHE_RS05380	chr	-	RHE_RS05380			CopG family transcriptional regulator	1033		RHE_RS05380	11		SM_b20129	-	SM_b20129	NP_436669.1	259	COG1802	K	transcriptional regulator (plasmid)	4779		SM_b20129	9		SM_b21650	-	SM_b21650	NP_438109.1	359	COG1609	K	LacI family transcriptional regulator (plasmid)	6217		SM_b21650	8
RHE_RS28305	p42f	-	RHE_RS28305	COG1522	K	Lrp/AsnC family transcriptional regulator	5447		RHE_RS28305	17		RHE_RS00725	chr	-	RHE_RS00725	COG1476	K	XRE family transcriptional regulator	135		RHE_RS00725	14		SMa0190	-	SMa0190	NP_435346.1	209	COG1309	K	transcriptional regulator (plasmid)	3463		SMa0190	14		SMa0190	-	SMa0190	NP_435346.1	209	COG1309	K	transcriptional regulator (plasmid)	3463		SMa0190	5
RHE_RS01265	chr	-	RHE_RS01265	COG1396	K	XRE family transcriptional regulator	239		RHE_RS01265	15		RHE_RS26765	p42f	-	RHE_RS26765	COG2186	K	FadR family transcriptional regulator	5142		RHE_RS26765	12		SMc01092	-	SMc01092	NP_384535.1	296	COG0583	K	transcriptional regulator	430		SMc01092	9		SMc03169	-	SMc03169	NP_387006.1	236	COG1309	K	transcriptional regulator	2909		SMc03169	7
RHE_RS28020	p42f	-	RHE_RS28020	COG2186	K	FadR family transcriptional regulator	5391		RHE_RS28020	16		RHE_RS27240	p42f	-	RHE_RS27240	COG1733	K	transcriptional regulator	5239		RHE_RS27240	13		SM_b20039	-	SM_b20039	NP_436582.1	474	COG1167	KE	transcriptional regulator (plasmid)	4691		SM_b20039	9		SM_b20055	-	SM_b20055	NP_436595.1	329	COG4977	K	transcriptional regulator (plasmid)	4704		SM_b20055	4
RHE_RS15555	chr	-	RHE_RS15555			CopG family transcriptional regulator	2994		RHE_RS15555	15		RHE_RS20710	chr	-	RHE_RS20710	COG0583	K	LysR family transcriptional regulator	3995		RHE_RS20710	14		SM_b20773	-	SM_b20773	NP_438005.1	228	COG1802	K	GntR family transcriptional regulator (plasmid)	6113		SM_b20773	12		SMc00654	ctrA	SMc00654	NP_386824.1	233	COG0745	TK	response regulator,controls chromosomal replication initiation protein	2727		SMc00654	7
RHE_RS22605	p42b	-	RHE_RS22605	COG1609	K	LacI family transcriptional regulator	4326		RHE_RS22605	18		RHE_RS18340	chr	-	RHE_RS18340	COG0745	TK	DNA-binding response regulator	3530		RHE_RS18340	14		SMc02022	-	SMc02022	NP_386640.1	330	COG1879	G	transcriptional regulator	2544		SMc02022	9		SMc01908	-	SMc01908	NP_385366.1	157	COG1846	K	transcriptional regulator	1265		SMc01908	4
RHE_RS23555	p42c	-	RHE_RS23555	COG1609	K	LacI family DNA-binding transcriptional regulator	4511		RHE_RS23555	20		RHE_RS07925	chr	-	RHE_RS07925	COG1846	K	ROK family transcriptional regulator	1531		RHE_RS07925	12		SM_b21180	-	SM_b21180	NP_437386.1	317	COG0583	K	LysR family transcriptional regulator (plasmid)	5497		SM_b21180	6		SM_b21180	-	SM_b21180	NP_437386.1	317	COG0583	K	LysR family transcriptional regulator (plasmid)	5497		SM_b21180	4
RHE_RS02165	chr	-	RHE_RS02165	COG0640	K	ArsR family transcriptional regulator	414		RHE_RS02165	14		RHE_RS12940	chr	-	RHE_RS12940	COG0640	K	ArsR family transcriptional regulator	2496		RHE_RS12940	11		SM_b20211	-	SM_b20211	NP_436744.1	310	COG0583	K	transcriptional regulator (plasmid)	4854		SM_b20211	12		SMa2215	-	SMa2215	NP_436441.1	255	COG2188	K	GntR family transcriptional regulator (plasmid)	4553		SMa2215	4
RHE_RS14160	chr	-	RHE_RS14160	COG1733	K	transcriptional regulator	2724		RHE_RS14160	21		RHE_RS14210	chr	-	RHE_RS14210	COG1959	K	Rrf2 family transcriptional regulator	2734		RHE_RS14210	13		SM_b20215	-	SM_b20215	NP_436748.1	326	COG4977	K	transcriptional regulator (plasmid)	4858		SM_b20215	12		SMc00109	-	SMc00109	NP_385085.1	155	COG0789	K	transcriptional regulator	982		SMc00109	4
RHE_RS23080	p42c	-	RHE_RS23080	COG1733	K	transcriptional regulator	4419		RHE_RS23080	19		RHE_RS22020	p42b	-	RHE_RS22020	COG1802	K	GntR family transcriptional regulator	4215		RHE_RS22020	14		SMa2027	-	SMa2027	NP_436355.1	297	COG0583	K	LysR family transcriptional regulator (plasmid)	4467		SMa2027	12		SM_b20219	-	SM_b20219	NP_436752.1	245	COG0745	TK	response regulator protein (plasmid)	4862		SM_b20219	4
RHE_RS06135	chr	-	RHE_RS06135	COG1309	K	TetR/AcrR family transcriptional regulator	1176		RHE_RS06135	17		RHE_RS05855	chr	-	RHE_RS05855	COG1349	KG	DeoR/GlpR transcriptional regulator	1122		RHE_RS05855	12		SM_b21117	-	SM_b21117	NP_437236.1	152	COG1396	K	transcriptional regulator (plasmid)	5349		SM_b21117	8		SM_b21117	-	SM_b21117	NP_437236.1	152	COG1396	K	transcriptional regulator (plasmid)	5349		SM_b21117	7
RHE_RS07315	chr	-	RHE_RS07315	COG2207	K	AraC family transcriptional regulator	1412		RHE_RS07315	13		RHE_RS16760	chr	-	RHE_RS16760	COG0784	T	two-component response regulator	3225		RHE_RS16760	21		SM_b21079	-	SM_b21079	NP_437198.1	243	COG0664	T	transcriptional regulator (plasmid)	5311		SM_b21079	8		SM_b21291	-	SM_b21291	NP_437335.1	315	COG0583	K	LysR family transcriptional regulator (plasmid)	5446		SM_b21291	4
RHE_RS08920	chr	-	RHE_RS08920	COG1522	K	Lrp/AsnC family transcriptional regulator	1718		RHE_RS08920	15		RHE_RS27185	p42f	-	RHE_RS27185	COG0583	K	LysR family transcriptional regulator	5227		RHE_RS27185	14		SMa0955	atrA	SMa0955	NP_435763.1	230	COG1802	K	GntR family transcriptional regulator (plasmid)	3881		SMa0955	9		SMc03210	-	SMc03210	NP_387047.1	159	COG1522	K	transcriptional regulator	2950		SMc03210	4
RHE_RS03720	chr	rirA	RHE_RS03720	COG1959	K	transcriptional regulator	710		RHE_RS03720	24		RHE_RS24475	p42e	-	RHE_RS24475	COG2207	K	AraC family transcriptional regulator	4695		RHE_RS24475	12		SM_b20276	-	SM_b20276	NP_436806.1	296	COG1737	K	transcriptional regulator (plasmid)	4917		SM_b20276	7		SMc02340	-	SMc02340	NP_386674.1	244	COG2188	K	transcriptional regulator	2578		SMc02340	5
RHE_RS17755	chr	-	RHE_RS17755	COG0217	KJ	YebC/PmpR family DNA-binding transcriptional regulator	3414		RHE_RS17755	16		RHE_RS02835	chr	-	RHE_RS02835	COG1846	K	MarR family transcriptional regulator	540		RHE_RS02835	13		SM_b20285	-	SM_b20285	NP_436815.1	325	COG0583	K	transcriptional regulator (plasmid)	4926		SM_b20285	10		SMc03140	-	SMc03140	NP_387059.1	243	COG2188	K	transcriptional regulator	2962		SMc03140	7
												RHE_RS08920	chr	-	RHE_RS08920	COG1522	K	Lrp/AsnC family transcriptional regulator	1718		RHE_RS08920	13		SMc02844	-	SMc02844	NP_384275.1	197	COG1309	K	transcriptional regulator	169		SMc02844	8		SMc01168	-	SMc01168	NP_385731.1	153	COG1522	K	transcriptional regulator	1630		SMc01168	2
Level_9									Capa9			RHE_RS19745	chr	-	RHE_RS19745	COG0583	K	LysR family transcriptional regulator	3800		RHE_RS19745	17		SMc03140	-	SMc03140	NP_387059.1	243	COG2188	K	transcriptional regulator	2962		SMc03140	8		SMa0355	-	SMa0355	NP_435437.2	164	COG0583	K	LysR family transcriptional regulator (plasmid)	3554		SMa0355	2
RHE_RS06620	chr	-	RHE_RS06620	COG0745	TK	DNA-binding response regulator	1272		RHE_RS06620	27		RHE_RS16415	chr	-	RHE_RS16415	COG1396	K	XRE family transcriptional regulator	3157		RHE_RS16415	14		SMa0557	-	SMa0557	NP_435536.1	295	COG0583	K	LysR family transcriptional regulator (plasmid)	3652		SMa0557	10		SMa1387	-	SMa1387	NP_436006.1	304	COG0583	K	LysR family transcriptional regulator (plasmid)	4123		SMa1387	4
RHE_RS00340	chr	-	RHE_RS00340	COG2197	TK	DNA-binding response regulator	59		RHE_RS00340	19		RHE_RS19750	chr	-	RHE_RS19750	COG0640	K	ArsR family transcriptional regulator	3801		RHE_RS19750	10		SMc00831	-	SMc00831	NP_384882.1	298	COG0583	K	transcriptional regulator	778		SMc00831	11		SM_b20425	-	SM_b20425	NP_436951.1	164	COG1522	K	transcriptional regulator (plasmid)	5062		SM_b20425	6
RHE_RS18835	chr	-	RHE_RS18835	COG2390	K	sugar-binding transcriptional regulator	3628		RHE_RS18835	15		RHE_RS15090	chr	-	RHE_RS15090	COG0568	K	RNA polymerase sigma factor RpoD	2905		RHE_RS15090	12		SM_b20426	-	SM_b20426	NP_436952.1	426	COG1167	KE	transcriptional regulator (plasmid)	5063		SM_b20426	7		SMa0179	-	SMa0179	NP_435340.1	305	COG0583	K	LysR family transcriptional regulator (plasmid)	3457		SMa0179	3
RHE_RS06580	chr	-	RHE_RS06580	COG0745	TK	DNA-binding response regulator	1264		RHE_RS06580	15														SMc01495	smoC	SMc01495	NP_386552.1	317	COG2390	K	transcriptional regulator	2456		SMc01495	6		SMc00678	-	SMc00678	NP_386800.2	161	COG1522	K	transcriptional regulator	2703		SMc00678	2
RHE_RS08925	chr	-	RHE_RS08925	COG1522	K	Lrp/AsnC family transcriptional regulator	1719		RHE_RS08925	17		Level_11									Capa11			SMc02893	-	SMc02893	NP_384324.1	308	COG0583	K	transcriptional regulator	219		SMc02893	11		SMa1948	-	SMa1948	NP_436312.1	238	COG0664	T	Crp family transcriptional regulator (plasmid)	4425		SMa1948	4
RHE_RS12990	chr	-	RHE_RS12990	COG1846	K	MarR family transcriptional regulator	2505		RHE_RS12990	19		RHE_RS23325	p42c	-	RHE_RS23325	COG4566	TK	DNA-binding response regulator	4469		RHE_RS23325	10		SMa1705	-	SMa1705	NP_436184.1	138	COG4957	K	MUCR family transcriptional regulatory protein IN SYRB 5\'region (plasmid)	4301		SMa1705	9		SM_b20525	-	SM_b20525	NP_437045.1	202	COG1309	K	transcriptional regulator (plasmid)	5158		SM_b20525	4
RHE_RS27925	p42f	-	RHE_RS27925	COG1609	K	LacI family transcriptional regulator	5373		RHE_RS27925	14		RHE_RS32370	p42f	-	RHE_RS32370	COG1595	K	RNA polymerase sigma factor	5550		RHE_RS32370	10		SMa1948	-	SMa1948	NP_436312.1	238	COG0664	T	Crp family transcriptional regulator (plasmid)	4425		SMa1948	8		SMc03015	-	SMc03015	NP_384753.1	245	COG2197	TK	transcriptional regulator	649		SMc03015	3
RHE_RS18270	chr	-	RHE_RS18270	COG2204	T	response regulator	3516		RHE_RS18270	20		RHE_RS25835	p42e	-	RHE_RS25835	COG2186	K	FadR family transcriptional regulator	4958		RHE_RS25835	7		SMa2107	-	SMa2107	NP_436395.1	301	COG0583	K	GstR transcriptional regulator (plasmid)	4508		SMa2107	10		SM_b21533	-	SM_b21533	NP_437513.1	261	COG1349	KG	GntR family transcriptional regulator (plasmid)	5622		SM_b21533	5
RHE_RS21205	p42a	-	RHE_RS21205	COG2390	K	sugar-binding transcriptional regulator	4088		RHE_RS21205	17		RHE_RS22770	p42b	-	RHE_RS22770	COG2169	L	AraC family transcriptional regulator	4358		RHE_RS22770	10		SMc00953	-	SMc00953	NP_385751.1	309	COG2207	K	transcriptional regulator	1650		SMc00953	7		SMc01975	-	SMc01975	NP_386615.1	238	COG2186	K	transcriptional regulator	2519		SMc01975	6
RHE_RS30310	p42d	-	RHE_RS30310	COG0583	K	LysR family transcriptional regulator	5834		RHE_RS30310	18		RHE_RS17430	chr	-	RHE_RS17430	COG1309	K	TetR/AcrR family transcriptional regulator	3349		RHE_RS17430	16		SM_b20859	-	SM_b20859	NP_437692.1	316	COG2207	K	AraC family transcriptional regulator (plasmid)	5801		SM_b20859	10		SM_b21093	-	SM_b21093	NP_437212.1	300	COG0583	K	LysR family transcriptional regulator (plasmid)	5325		SM_b21093	2
RHE_RS20285	chr	-	RHE_RS20285	COG0745	TK	DNA-binding response regulator	3910		RHE_RS20285	17		RHE_RS26695	p42f	-	RHE_RS26695	COG1595	K	RNA polymerase subunit sigma-70	5129		RHE_RS26695	15		SMc00256	-	SMc00256	NP_385790.1	335	COG4977	K	transcriptional regulator	1689		SMc00256	9		SM_b20592	rpo	SM_b20592	NP_438044.1	227	COG1595	K	RNA polymerase sigma factor (plasmid)	6152		SM_b20592	6
RHE_RS25185	p42e	-	RHE_RS25185	COG0583	K	LysR family transcriptional regulator	4832		RHE_RS25185	14		RHE_RS07110	chr	-	RHE_RS07110	COG0784	T	response regulator	1371		RHE_RS07110	9		SMc01819	-	SMc01819	NP_386558.1	213	COG1309	K	transcriptional regulator	2462		SMc01819	7		SMc02584	actR	SMc02584	NP_384171.1	194	COG4567	TK	transcriptional regulator	65		SMc02584	6
RHE_RS30285	p42d	-	RHE_RS30285			XRE family transcriptional regulator	5829		RHE_RS30285	15		RHE_RS15755	chr	-	RHE_RS15755	COG2197	TK	LuxR family transcriptional regulator	3030		RHE_RS15755	12		SMa0319	-	SMa0319	NP_435418.1	333	COG4977	K	AraC family transcriptional regulator (plasmid)	3534		SMa0319	9		SMc00658	-	SMc00658	NP_386820.1	247	COG2771	K	transcriptional regulator	2723		SMc00658	3
RHE_RS27525	p42f	-	RHE_RS27525	COG1609	K	LacI family DNA-binding transcriptional regulator	5294		RHE_RS27525	18		RHE_RS16100	chr	-	RHE_RS16100	COG0784	T	hybrid sensor histidine kinase/response regulator	3097		RHE_RS16100	11		SM_b21210	-	SM_b21210	NP_437416.1	223	COG0745	TK	two-component response regulator protein (plasmid)	5525		SM_b21210	7		SMc01819	-	SMc01819	NP_386558.1	213	COG1309	K	transcriptional regulator	2462		SMc01819	3
RHE_RS02340	chr	-	RHE_RS02340			TetR/AcrR family transcriptional regulator	445		RHE_RS02340	17		RHE_RS08760	chr	-	RHE_RS08760	COG0583	K	LysR family transcriptional regulator	1688		RHE_RS08760	10		SM_b21336	-	SM_b21336	NP_437452.1	314	COG2207	K	AraC family transcriptional regulator (plasmid)	5561		SM_b21336	10		SMc00256	-	SMc00256	NP_385790.1	335	COG4977	K	transcriptional regulator	1689		SMc00256	4
RHE_RS16760	chr	-	RHE_RS16760	COG0784	T	two-component response regulator	3225		RHE_RS16760	14		RHE_RS14175	chr	-	RHE_RS14175	COG0789	K	MerR family DNA-binding transcriptional regulator	2727		RHE_RS14175	16		SMa0520	-	SMa0520	NP_435520.1	280	COG1737	K	RpiR family transcriptional regulator (plasmid)	3635		SMa0520	8		SMa0750	-	SMa0750	NP_435645.1	292	COG0583	K	LysR family transcriptional regulator (plasmid)	3759		SMa0750	6
RHE_RS27930	p42f	-	RHE_RS27930	COG4977	K	AraC family transcriptional regulator	5374		RHE_RS27930	21		RHE_RS14185	chr	-	RHE_RS14185	COG0583	K	LysR family transcriptional regulator	2729		RHE_RS14185	13		SMa0372	-	SMa0372	NP_435446.1	299	COG0583	K	LysR family transcriptional regulator (plasmid)	3561		SMa0372	11		SMc04882	-	SMc04882	NP_387393.1	297	COG0583	K	transcriptional regulator	3305		SMc04882	2
RHE_RS02310	chr	-	RHE_RS02310	COG1309	K	TetR/AcrR family transcriptional regulator	439		RHE_RS02310	18		RHE_RS05790	chr	-	RHE_RS05790	COG1959	K	Rrf2 family transcriptional regulator	1110		RHE_RS05790	17		SM_b21525	-	SM_b21525	NP_437504.1	491	COG1167	KE	transcriptional regulator (plasmid)	5613		SM_b21525	5		SM_b21079	-	SM_b21079	NP_437198.1	243	COG0664	T	transcriptional regulator (plasmid)	5311		SM_b21079	3
RHE_RS23465	p42c	-	RHE_RS23465	COG0583	K	LysR family transcriptional regulator	4493		RHE_RS23465	20		RHE_RS26070	p42e	-	RHE_RS26070	COG2207	K	AraC family transcriptional regulator	5004		RHE_RS26070	11		SMc01570	-	SMc01570	NP_386427.1	296	COG0583	K	transcriptional regulator	2330		SMc01570	13		SM_b21158	-	SM_b21158	NP_437364.1	287	COG1737	K	transcriptional regulator (plasmid)	5475		SM_b21158	4
RHE_RS16135	chr	-	RHE_RS16135	COG2207	K	AraC family transcriptional regulator	3104		RHE_RS16135	11		RHE_RS26355	p42e	-	RHE_RS26355	COG1879	G	LacI family DNA-binding transcriptional regulator	5062		RHE_RS26355	15		SMc00780	-	SMc00780	NP_384831.1	293	COG0583	K	transcriptional regulator	727		SMc00780	8		SM_b21169	-	SM_b21169	NP_437375.1	141	COG0640	K	ArsR family transcriptional regulator (plasmid)	5486		SM_b21169	5
RHE_RS15755	chr	-	RHE_RS15755	COG2197	TK	LuxR family transcriptional regulator	3030		RHE_RS15755	15		RHE_RS01480	chr	-	RHE_RS01480	COG2207	K	AraC family transcriptional regulator	280		RHE_RS01480	14		SM_b21601	-	SM_b21601	NP_437581.1	306	COG4189	K	ArsR family transcriptional regulator (plasmid)	5690		SM_b21601	7		SMc03046	-	SMc03046	NP_384784.1	223	COG0745	TK	transcriptional regulator	680		SMc03046	6
RHE_RS11860	chr	-	RHE_RS11860	COG2207	K	AraC family transcriptional regulator	2293		RHE_RS11860	14		RHE_RS26000	p42e	-	RHE_RS26000	COG4977	K	AraC family transcriptional regulator	4990		RHE_RS26000	11		SMc02223	-	SMc02223	NP_384634.1	218	COG2932	X	transcriptional regulator	529		SMc02223	11		SMc00679	-	SMc00679	NP_386799.1	313	COG2207	K	transcriptional regulator	2702		SMc00679	10
RHE_RS18710	chr	-	RHE_RS18710	COG0583	K	LysR family transcriptional regulator	3603		RHE_RS18710	18		RHE_RS16340	chr	-	RHE_RS16340	COG0583	K	LysR family transcriptional regulator	3143		RHE_RS16340	12		SMa2287	-	SMa2287	NP_436477.2	310	COG0583	K	LysR family transcriptional regulator (plasmid)	4584		SMa2287	9		SMc03843	-	SMc03843	NP_387332.1	104	COG0640	K	transcriptional regulator	3244		SMc03843	4
RHE_RS25905	p42e	-	RHE_RS25905	COG2207	K	AraC family transcriptional regulator	4972		RHE_RS25905	12		RHE_RS12670	chr	-	RHE_RS12670	COG0664	T	Crp/Fnr family transcriptional regulator	2445		RHE_RS12670	11		SMc04162	-	SMc04162	NP_386097.1	109	COG0640	K	transcriptional regulator	1999		SMc04162	9		SMc00877	-	SMc00877	NP_384935.1	277	COG2197	TK	transcriptional regulator	831		SMc00877	5
RHE_RS19020	chr	-	RHE_RS19020	COG0789	K	MerR family DNA-binding transcriptional regulator	3664		RHE_RS19020	15		RHE_RS22830	p42b	-	RHE_RS22830	COG1396	K	transcriptional regulator	4370		RHE_RS22830	12		SMa0849	syrM	SMa0849	NP_435708.1	326	COG0583	K	SyrM transcriptional regulator (plasmid)	3825		SMa0849	7		SM_b21484	rpoE5	SM_b21484	NP_437851.1	173	COG1595	K	RNA polymerase sigma-E factor (sigma-24) protein (plasmid)	5960		SM_b21484	7
RHE_RS14115	chr	-	RHE_RS14115	COG4977	K	AraC family transcriptional regulator	2715		RHE_RS14115	14		RHE_RS26790	p42f	-	RHE_RS26790	COG0664	T	transcriptional regulator	5147		RHE_RS26790	10		SMa1387	-	SMa1387	NP_436006.1	304	COG0583	K	LysR family transcriptional regulator (plasmid)	4123		SMa1387	8		SMc03060	aglR	SMc03060	NP_384800.1	356	COG1609	K	transcriptional regulator	696		SMc03060	7
RHE_RS24110	p42e	-	RHE_RS24110	COG1609	K	LacI family transcriptional regulator	4621		RHE_RS24110	16		RHE_RS30310	p42d	-	RHE_RS30310	COG0583	K	LysR family transcriptional regulator	5834		RHE_RS30310	13		SMa1454	-	SMa1454	NP_436039.2	347	COG2207	K	AraC family transcriptional regulator (plasmid)	4156		SMa1454	14		SMc01664	-	SMc01664	NP_386382.1	281	COG0583	K	transcriptional regulator	2285		SMc01664	4
RHE_RS04575	chr	-	RHE_RS04575	COG1733	K	transcriptional regulator	877		RHE_RS04575	19		RHE_RS25185	p42e	-	RHE_RS25185	COG0583	K	LysR family transcriptional regulator	4832		RHE_RS25185	12		SMa1480	-	SMa1480	NP_436052.2	295	COG0583	K	LysR family transcriptional regulator (plasmid)	4169		SMa1480	12		SMc00107	-	SMc00107	NP_385080.1	237	COG2378	K	transcriptional regulator	977		SMc00107	4
RHE_RS05510	chr	-	RHE_RS05510	COG0640	K	transcriptional regulator	1058		RHE_RS05510	14		RHE_RS22190	p42b	-	RHE_RS22190	COG2186	K	FadR family transcriptional regulator	4248		RHE_RS22190	15		SMa1954	-	SMa1954	NP_436316.1	327	COG0583	K	LysR family transcriptional regulator (plasmid)	4429		SMa1954	10		SMc00429	-	SMc00429	NP_384454.1	269	COG2207	K	transcriptional regulator	349		SMc00429	5
RHE_RS10425	chr	-	RHE_RS10425	COG1846	K	MarR family transcriptional regulator	2010		RHE_RS10425	13		RHE_RS07685	chr	-	RHE_RS07685	COG1846	K	MarR family transcriptional regulator	1487		RHE_RS07685	10		SMc01223	-	SMc01223	NP_385674.1	156	COG1522	K	transcriptional regulator	1573		SMc01223	6		SM_b21649	agpT	SM_b21649	NP_438108.1	313	COG2207	K	AraC family transcriptional regulator (plasmid)	6216		SM_b21649	3
RHE_RS20490	chr	-	RHE_RS20490	COG1349	KG	DeoR/GlpR transcriptional regulator	3950		RHE_RS20490	18		RHE_RS29630	p42d	-	RHE_RS29630	COG0583	K	LysR family transcriptional regulator	5704		RHE_RS29630	8		SMa2303	-	SMa2303	NP_436486.1	408	COG1940	KG	ROK family transcriptional regulator (plasmid)	4593		SMa2303	10		SMc01630	-	SMc01630	NP_386348.1	267	COG2197	TK	transcriptional regulator	2251		SMc01630	6
RHE_RS05730	chr	-	RHE_RS05730	COG1609	K	LacI family DNA-binding transcriptional regulator	1098		RHE_RS05730	18		RHE_RS18710	chr	-	RHE_RS18710	COG0583	K	LysR family transcriptional regulator	3603		RHE_RS18710	8		SMc00146	-	SMc00146	NP_385968.1	163	COG1846	K	transcriptional regulator	1868		SMc00146	7		SMc00831	-	SMc00831	NP_384882.1	298	COG0583	K	transcriptional regulator	778		SMc00831	6
RHE_RS03085	chr	-	RHE_RS03085	COG2186	K	FadR family transcriptional regulator	587		RHE_RS03085	16		RHE_RS23945	p42c	-	RHE_RS23945	COG1609	K	LacI family transcriptional regulator	4591		RHE_RS23945	13		SMc00182	-	SMc00182	NP_385930.1	161	COG0789	K	transcriptional regulator	1830		SMc00182	6		SMa0222	-	SMa0222	NP_435364.1	242	COG1802	K	GntR family transcriptional regulator (plasmid)	3481		SMa0222	6
RHE_RS13235	chr	-	RHE_RS13235	COG1733	K	transcriptional regulator	2551		RHE_RS13235	18		RHE_RS25905	p42e	-	RHE_RS25905	COG2207	K	AraC family transcriptional regulator	4972		RHE_RS25905	10		SMc02866	-	SMc02866	NP_384297.1	216	COG1309	K	transcriptional regulator	191		SMc02866	15		SMc02223	-	SMc02223	NP_384634.1	218	COG2932	X	transcriptional regulator	529		SMc02223	6
RHE_RS06175	chr	-	RHE_RS06175	COG2378	K	YafY family transcriptional regulator	1184		RHE_RS06175	13		RHE_RS13180	chr	-	RHE_RS13180	COG0745	TK	DNA-binding response regulator	2542		RHE_RS13180	14		SMc04143	-	SMc04143	NP_384215.1	240	COG2186	K	transcriptional regulator	109		SMc04143	12		SMa0307	-	SMa0307	NP_435412.1	328	COG0583	K	LysR family transcriptional regulator (plasmid)	3528		SMa0307	3
RHE_RS24475	p42e	-	RHE_RS24475	COG2207	K	AraC family transcriptional regulator	4695		RHE_RS24475	16		RHE_RS25170	p42e	-	RHE_RS25170	COG1522	K	Lrp/AsnC family transcriptional regulator	4829		RHE_RS25170	11															SMa0849	syrM	SMa0849	NP_435708.1	326	COG0583	K	SyrM transcriptional regulator (plasmid)	3825		SMa0849	4
RHE_RS19545	chr	-	RHE_RS19545	COG0271	T	BolA family transcriptional regulator	3762		RHE_RS19545	16		RHE_RS26720	p42f	-	RHE_RS26720	COG0664	T	Crp/Fnr family transcriptional regulator	5134		RHE_RS26720	15		Level_10										Capa10			SMa1299	-	SMa1299	NP_435953.1	203	COG1309	K	TetR family transcriptional regulator (plasmid)	4068		SMa1299	2
RHE_RS25605	p42e	-	RHE_RS25605	COG1309	K	TetR/AcrR family transcriptional regulator	4912		RHE_RS25605	17		RHE_RS28725	p42f	-	RHE_RS28725			transcriptional regulator	5529		RHE_RS28725	15		SM_b20106	-	SM_b20106	NP_436646.1	243	COG2186	K	transcriptional regulator (plasmid)	4756		SM_b20106	9		SMc00878	-	SMc00878	NP_384934.1	246	COG2771	K	transcriptional regulator	830		SMc00878	5
RHE_RS10960	chr	-	RHE_RS10960			GntR family transcriptional regulator	2118		RHE_RS10960	10		RHE_RS28305	p42f	-	RHE_RS28305	COG1522	K	Lrp/AsnC family transcriptional regulator	5447		RHE_RS28305	9		SMc01563	sigA	SMc01563	NP_386420.1	684	COG0568	K	RNA polymerase sigma factor RpoD	2323		SMc01563	10		SMa2163	-	SMa2163	NP_436421.2	293	COG4977	K	AraC family transcriptional regulator (plasmid)	4533		SMa2163	4
RHE_RS15090	chr	-	RHE_RS15090	COG0568	K	RNA polymerase sigma factor RpoD	2905		RHE_RS15090	20		RHE_RS01430	chr	-	RHE_RS01430	COG1846	K	MarR family transcriptional regulator	272		RHE_RS01430	10		SM_b21650	-	SM_b21650	NP_438109.1	359	COG1609	K	LacI family transcriptional regulator (plasmid)	6217		SM_b21650	11		SMc00929	-	SMc00929	NP_384925.1	326	COG0583	K	transcriptional regulator	821		SMc00929	4
RHE_RS04010	chr	-	RHE_RS04010	COG0583	K	LysR family transcriptional regulator	765		RHE_RS04010	15		RHE_RS06175	chr	-	RHE_RS06175	COG2378	K	YafY family transcriptional regulator	1184		RHE_RS06175	12		SMc03169	-	SMc03169	NP_387006.1	236	COG1309	K	transcriptional regulator	2909		SMc03169	4		SMc02888	-	SMc02888	NP_384319.1	340	COG2207	K	transcriptional regulator	214		SMc02888	5
RHE_RS23695	p42c	-	RHE_RS23695	COG1414	K	IclR family transcriptional regulator	4540		RHE_RS23695	17		RHE_RS10510	chr	-	RHE_RS10510	COG1846	K	ROK family transcriptional regulator	2027		RHE_RS10510	17		SMc00380	-	SMc00380	NP_384406.1	164	COG1846	K	transcriptional regulator	301		SMc00380	5		SMc03998	-	SMc03998	NP_386888.1	86	COG0640	K	transcriptional regulator	2791		SMc03998	8
RHE_RS08785	chr	-	RHE_RS08785	COG1609	K	LacI family DNA-binding transcriptional regulator	1692		RHE_RS08785	14		RHE_RS09130	chr	-	RHE_RS09130	COG1609	K	LacI family DNA-binding transcriptional regulator	1759		RHE_RS09130	12		SMa0078	-	SMa0078	NP_435284.1	340	COG1609	K	LacI family transcriptional regulator (plasmid)	3399		SMa0078	5		SMc04051	rpoE4	SMc04051	NP_386940.1	178	COG1595	K	RNA polymerase sigma-E factor (sigma-24) protein	2843		SMc04051	4
RHE_RS14185	chr	-	RHE_RS14185	COG0583	K	LysR family transcriptional regulator	2729		RHE_RS14185	15		RHE_RS27195	p42f	-	RHE_RS27195	COG0664	T	Crp/Fnr family transcriptional regulator	5229		RHE_RS27195	12		SM_b21102	-	SM_b21102	NP_437221.1	260	COG1414	K	transcriptional regulator (plasmid)	5334		SM_b21102	5		SMc04315	-	SMc04315	NP_386076.1	282	COG0583	K	transcriptional regulator	1977		SMc04315	5
RHE_RS14355	chr	-	RHE_RS14355	COG0583	K	LysR family transcriptional regulator	2761		RHE_RS14355	20		RHE_RS17145	chr	-	RHE_RS17145	COG0583	K	LysR family transcriptional regulator	3300		RHE_RS17145	11		SMa5007	-	SMa5007	YP_002000351.1	126	COG5499	V	transcriptional regulator (plasmid)	3899		SMa5007	4
RHE_RS19745	chr	-	RHE_RS19745	COG0583	K	LysR family transcriptional regulator	3800		RHE_RS19745	19		RHE_RS16800	chr	-	RHE_RS16800	COG4977	K	transcriptional regulator FtrA	3232		RHE_RS16800	17		SM_b20387	-	SM_b20387	NP_436913.1	239	COG1414	K	transcriptional regulator (plasmid)	5024		SM_b20387	7												Capa9
RHE_RS12585	chr	-	RHE_RS12585	COG1609	K	LacI family DNA-binding transcriptional regulator	2429		RHE_RS12585	19		RHE_RS21915	p42a	-	RHE_RS21915	COG2771	K	LuxR family transcriptional regulator	4195		RHE_RS21915	10		SM_b20162	-	SM_b20162	NP_436702.1	229	COG2197	TK	transcriptional regulator (plasmid)	4812		SM_b20162	6												SMc01563	2
RHE_RS12940	chr	-	RHE_RS12940	COG0640	K	ArsR family transcriptional regulator	2496		RHE_RS12940	13		RHE_RS04705	chr	-	RHE_RS04705	COG0583	K	LysR family transcriptional regulator	902		RHE_RS04705	12		SMc00109	-	SMc00109	NP_385085.1	155	COG0789	K	transcriptional regulator	982		SMc00109	9												SMc01982
RHE_RS01430	chr	-	RHE_RS01430	COG1846	K	MarR family transcriptional regulator	272		RHE_RS01430	13		RHE_RS10640	chr	-	RHE_RS10640	COG1802	K	GntR family transcriptional regulator	2054		RHE_RS10640	10		SMa2015	-	SMa2015	NP_436350.1	173	COG0583	K	transcriptional regulator (plasmid)	4462		SMa2015	7												SMa0830
												RHE_RS20625	chr	-	RHE_RS20625	COG2188	K	GntR family transcriptional regulator	3978		RHE_RS20625	13		SMa1893	-	SMa1893	NP_436287.1	291	COG0583	K	LysR family transcriptional regulator (plasmid)	4400		SMa1893	7												SMa0846
Level_10									Capa10															SM_b20337	-	SM_b20337	NP_436863.1	203	COG1309	K	transcriptional regulator (plasmid)	4974		SM_b20337	5												SMc04239
RHE_RS19425	chr	-	RHE_RS19425	COG2204	T	response regulator	3738		RHE_RS19425	25		Level_12									Capa12			SM_b21533	-	SM_b21533	NP_437513.1	261	COG1349	KG	GntR family transcriptional regulator (plasmid)	5622		SM_b21533	7												SMa0814
RHE_RS15925	chr	-	RHE_RS15925	COG1695	K	PadR family transcriptional regulator	3063		RHE_RS15925	14		RHE_RS18085	chr	-	RHE_RS18085	COG0583	K	LysR family transcriptional regulator	3479		RHE_RS18085	10		SMc01651	-	SMc01651	NP_386369.1	302	COG0583	K	transcriptional regulator	2272		SMc01651	8												SMc00828
RHE_RS30570	p42d	-	RHE_RS30570	COG1396	K	XRE family transcriptional regulator	5883		RHE_RS30570	14		RHE_RS19425	chr	-	RHE_RS19425	COG2204	T	response regulator	3738		RHE_RS19425	14		SMc02340	-	SMc02340	NP_386674.1	244	COG2188	K	transcriptional regulator	2578		SMc02340	3												SMc00270
RHE_RS24725	p42e	-	RHE_RS24725	COG0583	K	LysR family transcriptional regulator	4745		RHE_RS24725	13		RHE_RS06620	chr	-	RHE_RS06620	COG0745	TK	DNA-binding response regulator	1272		RHE_RS06620	17		SM_b20366	-	SM_b20366	NP_436892.1	334	COG1609	K	LacI family transcriptional regulator (plasmid)	5003		SM_b20366	7												SM_b20665
RHE_RS07830	chr	-	RHE_RS07830	COG0789	K	MerR family transcriptional regulator	1516		RHE_RS07830	18		RHE_RS20825	chr	-	RHE_RS20825	COG2005	K	LysR family transcriptional regulator	4017		RHE_RS20825	13		SMc01168	-	SMc01168	NP_385731.1	153	COG1522	K	transcriptional regulator	1630		SMc01168	8												SMa1132
RHE_RS28890	p42f	-	RHE_RS28890	COG1309	K	TetR family transcriptional regulator	5562		RHE_RS28890	16		RHE_RS30470	p42d	-	RHE_RS30470	COG0664	T	Crp/Fnr family transcriptional regulator	5862		RHE_RS30470	7		SM_b20367	-	SM_b20367	NP_436893.1	230	COG1309	K	transcriptional regulator (plasmid)	5004		SM_b20367	7												SMc04320
RHE_RS24095	p42e	-	RHE_RS24095	COG1309	K	TetR/AcrR family transcriptional regulator	4618		RHE_RS24095	16		RHE_RS06845	chr	-	RHE_RS06845	COG2169	L	AraC family transcriptional regulator	1318		RHE_RS06845	12		SM_b20392	-	SM_b20392	NP_436918.1	235	COG2186	K	transcriptional regulator NanR (plasmid)	5029		SM_b20392	7												SM_b21345
RHE_RS18680	chr	-	RHE_RS18680	COG1309	K	TetR/AcrR family transcriptional regulator	3597		RHE_RS18680	13		RHE_RS14160	chr	-	RHE_RS14160	COG1733	K	transcriptional regulator	2724		RHE_RS14160	11		SM_b21299	deoR	SM_b21299	NP_437343.1	263	COG1349	KG	DeoR family transcriptional regulator (plasmid)	5454		SM_b21299	6												SMa0829
RHE_RS04030	chr	-	RHE_RS04030	COG0583	K	LysR family transcriptional regulator	769		RHE_RS04030	16		RHE_RS18525	chr	-	RHE_RS18525	COG1846	K	MarR family transcriptional regulator	3567		RHE_RS18525	12		SM_b21706	-	SM_b21706	NP_438087.1	267	COG1609	K	LacI family transcriptional regulator (plasmid)	6195		SM_b21706	7												SMa1334
RHE_RS18900	chr	-	RHE_RS18900	COG2186	K	FadR family transcriptional regulator	3641		RHE_RS18900	19		RHE_RS16670	chr	-	RHE_RS16670	COG1309	K	TetR/AcrR family transcriptional regulator	3207		RHE_RS16670	11		SM_b20441	-	SM_b20441	NP_436963.1	246	COG2186	K	transcriptional regulator (plasmid)	5074		SM_b20441	6												SMc00864
RHE_RS22030	p42b	-	RHE_RS22030	COG1309	K	TetR/AcrR family transcriptional regulator	4217		RHE_RS22030	11		RHE_RS08925	chr	-	RHE_RS08925	COG1522	K	Lrp/AsnC family transcriptional regulator	1719		RHE_RS08925	11		SMa0179	-	SMa0179	NP_435340.1	305	COG0583	K	LysR family transcriptional regulator (plasmid)	3457		SMa0179	7												SMc01267
RHE_RS18685	chr	-	RHE_RS18685	COG2207	K	AraC family transcriptional regulator	3598		RHE_RS18685	15		RHE_RS24755	p42e	-	RHE_RS24755	COG0702	R	NmrA family transcriptional regulator	4751		RHE_RS24755	10		SM_b20494	-	SM_b20494	NP_437016.1	298	COG0583	K	transcriptional regulator (plasmid)	5128		SM_b20494	4												SMc01989
RHE_RS28545	p42f	-	RHE_RS28545	COG1917	R	transcriptional regulator	5495		RHE_RS28545	14		RHE_RS05020	chr	-	RHE_RS05020	COG0640	K	ArsR family transcriptional regulator	963		RHE_RS05020	10		SMc04169	-	SMc04169	NP_386104.1	334	COG4977	K	transcriptional regulator	2006		SMc04169	7												SMa0636
RHE_RS10545	chr	-	RHE_RS10545	COG2186	K	FadR family transcriptional regulator	2035		RHE_RS10545	13		RHE_RS05915	chr	-	RHE_RS05915	COG0583	K	LysR family transcriptional regulator	1132		RHE_RS05915	11		SM_b20896	gbpR	SM_b20896	NP_437730.1	302	COG0583	K	LysR family transcriptional regulator (plasmid)	5839		SM_b20896	9												SMa0872
RHE_RS28855	p42f	-	RHE_RS28855	COG2207	K	AraC family transcriptional regulator	5555		RHE_RS28855	12		RHE_RS28625	p42f	-	RHE_RS28625	COG1595	K	RNA polymerase sigma factor	5511		RHE_RS28625	8		SM_b20516	-	SM_b20516	NP_437037.1	108			response regulator protein (plasmid)	5150		SM_b20516	5												SMc01195
RHE_RS20710	chr	-	RHE_RS20710	COG0583	K	LysR family transcriptional regulator	3995		RHE_RS20710	15		RHE_RS14605	chr	-	RHE_RS14605	COG2001	J	transcriptional regulator MraZ	2809		RHE_RS14605	8		SM_b20525	-	SM_b20525	NP_437045.1	202	COG1309	K	transcriptional regulator (plasmid)	5158		SM_b20525	5												SMc03287
RHE_RS22830	p42b	-	RHE_RS22830	COG1396	K	transcriptional regulator	4370		RHE_RS22830	13		RHE_RS26875	p42f	-	RHE_RS26875	COG1609	K	LacI family DNA-binding transcriptional regulator	5164		RHE_RS26875	15		SMc03015	-	SMc03015	NP_384753.1	245	COG2197	TK	transcriptional regulator	649		SMc03015	5												SMc04194
RHE_RS08760	chr	-	RHE_RS08760	COG0583	K	LysR family transcriptional regulator	1688		RHE_RS08760	9		RHE_RS15555	chr	-	RHE_RS15555			CopG family transcriptional regulator	2994		RHE_RS15555	11		SMa2049	-	SMa2049	NP_436366.1	360	COG1879	G	LacI family transcriptional regulator (plasmid)	4479		SMa2049	7												SMa0123
RHE_RS12915	chr	-	RHE_RS12915	COG4977	K	GlxA family transcriptional regulator	2491		RHE_RS12915	14		RHE_RS01720	chr	-	RHE_RS01720	COG2186	K	FadR family transcriptional regulator	325		RHE_RS01720	7		SMc00698	-	SMc00698	NP_386780.1	93	COG0271	T	transcriptional regulator	2684		SMc00698	12												SMa1141
RHE_RS14175	chr	-	RHE_RS14175	COG0789	K	MerR family DNA-binding transcriptional regulator	2727		RHE_RS14175	13		RHE_RS10485	chr	-	RHE_RS10485	COG0583	K	LysR family transcriptional regulator	2022		RHE_RS10485	10		SM_b20586	-	SM_b20586	NP_438038.1	251	COG1414	K	IclR family transcriptional regulator (plasmid)	6146		SM_b20586	8												SMc02773
RHE_RS22190	p42b	-	RHE_RS22190	COG2186	K	FadR family transcriptional regulator	4248		RHE_RS22190	17		RHE_RS06580	chr	-	RHE_RS06580	COG0745	TK	DNA-binding response regulator	1264		RHE_RS06580	11		SM_b21093	-	SM_b21093	NP_437212.1	300	COG0583	K	LysR family transcriptional regulator (plasmid)	5325		SM_b21093	8												SMc04363
RHE_RS23055	p42c	-	RHE_RS23055	COG1609	K	LacI family transcriptional regulator	4414		RHE_RS23055	14		RHE_RS13295	chr	-	RHE_RS13295	COG2207	K	AraC family transcriptional regulator	2561		RHE_RS13295	13		SM_b20667	-	SM_b20667	NP_437914.1	334	COG1609	K	LacI family transcriptional regulator (plasmid)	6023		SM_b20667	5												SMa0822
RHE_RS15995	chr	-	RHE_RS15995	COG0583	K	LysR family transcriptional regulator	3077		RHE_RS15995	13		RHE_RS20460	chr	-	RHE_RS20460	COG2197	TK	LuxR family transcriptional regulator	3944		RHE_RS20460	7		SM_b20817	-	SM_b20817	NP_437097.1	343	COG1879	G	LacI family transcriptional regulator (plasmid)	5210		SM_b20817	8												SMa1918
RHE_RS29630	p42d	-	RHE_RS29630	COG0583	K	LysR family transcriptional regulator	5704		RHE_RS29630	7		RHE_RS14100	chr	-	RHE_RS14100	COG2390	K	sugar-binding transcriptional regulator	2712		RHE_RS14100	14		SM_b21464	-	SM_b21464	NP_437830.1	257	COG2188	K	GntR family transcriptional regulator (plasmid)	5939		SM_b21464	6												SMc03251
RHE_RS29535	p42d	-	RHE_RS29535			response regulator	5686		RHE_RS29535	7		RHE_RS00765	chr	-	RHE_RS00765	COG1846	K	MarR family transcriptional regulator	143		RHE_RS00765	15		SMc00878	-	SMc00878	NP_384934.1	246	COG2771	K	transcriptional regulator	830		SMc00878	9												SMa1797
RHE_RS26000	p42e	-	RHE_RS26000	COG4977	K	AraC family transcriptional regulator	4990		RHE_RS26000	11		RHE_RS24735	p42e	-	RHE_RS24735	COG0640	K	ArsR family transcriptional regulator	4747		RHE_RS24735	10		SMc02888	-	SMc02888	NP_384319.1	340	COG2207	K	transcriptional regulator	214		SMc02888	6												SMc00941
RHE_RS26720	p42f	-	RHE_RS26720	COG0664	T	Crp/Fnr family transcriptional regulator	5134		RHE_RS26720	14		RHE_RS13060	chr	-	RHE_RS13060	COG0583	K	LysR family transcriptional regulator	2518		RHE_RS13060	11		SMa1442	-	SMa1442	NP_436034.1	254	COG2186	K	GntR family transcriptional regulator (plasmid)	4151		SMa1442	5												SM_b20365
RHE_RS13450	chr	-	RHE_RS13450	COG1396	K	XRE family transcriptional regulator	2590		RHE_RS13450	15		RHE_RS02310	chr	-	RHE_RS02310	COG1309	K	TetR/AcrR family transcriptional regulator	439		RHE_RS02310	14		SMa1987	-	SMa1987	NP_436335.1	279	COG0583	K	LysR family transcriptional regulator (plasmid)	4448		SMa1987	10												SMa2263
RHE_RS24755	p42e	-	RHE_RS24755	COG0702	R	NmrA family transcriptional regulator	4751		RHE_RS24755	10		RHE_RS29840	p42d	-	RHE_RS29840	COG1802	K	GntR family transcriptional regulator	5746		RHE_RS29840	14		SMc04882	-	SMc04882	NP_387393.1	297	COG0583	K	transcriptional regulator	3305		SMc04882	6												SM_b20392	5
RHE_RS13215	chr	-	RHE_RS13215	COG1309	K	TetR/AcrR family transcriptional regulator	2547		RHE_RS13215	11		RHE_RS29075	p42f	-	RHE_RS29075	COG0664	T	nitrogen fixation transcriptional regulator protein	5595		RHE_RS29075	13		SM_b21158	-	SM_b21158	NP_437364.1	287	COG1737	K	transcriptional regulator (plasmid)	5475		SM_b21158	8												SM_b20441	4
RHE_RS19695	chr	-	RHE_RS19695	COG1522	K	Lrp/AsnC family transcriptional regulator	3791		RHE_RS19695	13		RHE_RS09045	chr	-	RHE_RS09045	COG1522	K	Lrp/AsnC family transcriptional regulator	1742		RHE_RS09045	10		SM_b21169	-	SM_b21169	NP_437375.1	141	COG0640	K	ArsR family transcriptional regulator (plasmid)	5486		SM_b21169	5												SMa1136
RHE_RS28725	p42f	-	RHE_RS28725			transcriptional regulator	5529		RHE_RS28725	14		RHE_RS10960	chr	-	RHE_RS10960			GntR family transcriptional regulator	2118		RHE_RS10960	9		SMa1726	-	SMa1726	NP_436195.2	203	COG1309	K	TetR family transcriptional regulator (plasmid)	4310		SMa1726	5												SMa2015	3
RHE_RS02765	chr	-	RHE_RS02765	COG1959	K	Rrf2 family transcriptional regulator	526		RHE_RS02765	15		RHE_RS20490	chr	-	RHE_RS20490	COG1349	KG	DeoR/GlpR transcriptional regulator	3950		RHE_RS20490	12		SM_b21270	-	SM_b21270	NP_437314.1	154	COG0664	T	transcriptional regulator (plasmid)	5426		SM_b21270	5												SMc02642
RHE_RS10510	chr	-	RHE_RS10510	COG1846	K	ROK family transcriptional regulator	2027		RHE_RS10510	17		RHE_RS17090	chr	-	RHE_RS17090	COG0568	K	RNA polymerase sigma factor RpoH	3289		RHE_RS17090	11		SM_b21272	-	SM_b21272	NP_437316.1	356	COG1609	K	LacI family transcriptional regulator (plasmid)	5428		SM_b21272	6												SMc04054
RHE_RS26765	p42f	-	RHE_RS26765	COG2186	K	FadR family transcriptional regulator	5142		RHE_RS26765	16		RHE_RS04315	chr	-	RHE_RS04315	COG2197	TK	LuxR family transcriptional regulator	826		RHE_RS04315	10		SMc03843	-	SMc03843	NP_387332.1	104	COG0640	K	transcriptional regulator	3244		SMc03843	7												SM_b21706	2
RHE_RS03175	chr	-	RHE_RS03175	COG0745	TK	response regulator	605		RHE_RS03175	14		RHE_RS29535	p42d	-	RHE_RS29535			response regulator	5686		RHE_RS29535	7		SMc00877	-	SMc00877	NP_384935.1	277	COG2197	TK	transcriptional regulator	831		SMc00877	5												SM_b21574
RHE_RS24350	p42e	-	RHE_RS24350	COG0583	K	LysR family transcriptional regulator	4669		RHE_RS24350	14		RHE_RS13370	chr	-	RHE_RS13370	COG2207	K	AraC family transcriptional regulator	2574		RHE_RS13370	10		SMc00766	-	SMc00766	NP_384816.1	291	COG0583	K	transcriptional regulator	712		SMc00766	10												SMa5007	3
RHE_RS28010	p42f	-	RHE_RS28010	COG1609	K	LacI family transcriptional regulator	5390		RHE_RS28010	13		RHE_RS19020	chr	-	RHE_RS19020	COG0789	K	MerR family DNA-binding transcriptional regulator	3664		RHE_RS19020	10		SMc02851	-	SMc02851	NP_384282.1	147	COG1846	K	transcriptional regulator	176		SMc02851	8												SM_b20508
RHE_RS01720	chr	-	RHE_RS01720	COG2186	K	FadR family transcriptional regulator	325		RHE_RS01720	11		RHE_RS28510	p42f	-	RHE_RS28510	COG1802	K	GntR family transcriptional regulator	5488		RHE_RS28510	8		SM_b21419	-	SM_b21419	NP_437786.1	295	COG0662	G	AraC family transcriptional regulator (plasmid)	5895		SM_b21419	6												SMa0232
RHE_RS22090	p42b	-	RHE_RS22090	COG1349	KG	DeoR/GlpR transcriptional regulator	4228		RHE_RS22090	15		RHE_RS28450	p42f	-	RHE_RS28450	COG0583	K	LysR family transcriptional regulator	5476		RHE_RS28450	15		SMa0307	-	SMa0307	NP_435412.1	328	COG0583	K	LysR family transcriptional regulator (plasmid)	3528		SMa0307	5												SM_b20516	2
RHE_RS13770	chr	-	RHE_RS13770	COG0583	K	LysR family transcriptional regulator	2650		RHE_RS13770	21		RHE_RS28340	p42f	-	RHE_RS28340	COG1802	K	GntR family transcriptional regulator	5454		RHE_RS28340	7		SMa1299	-	SMa1299	NP_435953.1	203	COG1309	K	TetR family transcriptional regulator (plasmid)	4068		SMa1299	12												SMa0407
RHE_RS27600	p42f	-	RHE_RS27600	COG0640	K	ArsR family transcriptional regulator	5307		RHE_RS27600	7		RHE_RS18685	chr	-	RHE_RS18685	COG2207	K	AraC family transcriptional regulator	3598		RHE_RS18685	10		SMa2163	-	SMa2163	NP_436421.2	293	COG4977	K	AraC family transcriptional regulator (plasmid)	4533		SMa2163	7												SMa1118
RHE_RS03430	chr	-	RHE_RS03430	COG0745	TK	DNA-binding response regulator	656		RHE_RS03430	12		RHE_RS27935	p42f	-	RHE_RS27935	COG1846	K	ROK family transcriptional regulator	5375		RHE_RS27935	12		SMa0063	-	SMa0063	NP_435276.2	244	COG2186	K	GntR family transcriptional regulator (plasmid)	3391		SMa0063	10												SMc01226	6
RHE_RS27460	p42f	-	RHE_RS27460	COG2203	T	PucR family transcriptional regulator	5281		RHE_RS27460	12		RHE_RS27570	p42f	-	RHE_RS27570	COG2002	KV	AbrB family transcriptional regulator	5302		RHE_RS27570	10		SMc02976	-	SMc02976	NP_386974.1	167	COG1846	K	transcriptional regulator	2877		SMc02976	5												SM_b20049
RHE_RS27195	p42f	-	RHE_RS27195	COG0664	T	Crp/Fnr family transcriptional regulator	5229		RHE_RS27195	13		RHE_RS27460	p42f	-	RHE_RS27460	COG2203	T	PucR family transcriptional regulator	5281		RHE_RS27460	11		SMa0114	-	SMa0114	NP_435304.1	120	COG0784	T	two-component response regulator (plasmid)	3420		SMa0114	8												SMa0831
RHE_RS27280	p42f	-	RHE_RS27280	COG1802	K	GntR family transcriptional regulator	5247		RHE_RS27280	16		RHE_RS04010	chr	-	RHE_RS04010	COG0583	K	LysR family transcriptional regulator	765		RHE_RS04010	10		SMa0222	-	SMa0222	NP_435364.1	242	COG1802	K	GntR family transcriptional regulator (plasmid)	3481		SMa0222	6												SMa1456
RHE_RS07925	chr	-	RHE_RS07925	COG1846	K	ROK family transcriptional regulator	1531		RHE_RS07925	16		RHE_RS27470	p42f	-	RHE_RS27470	COG1522	K	Lrp/AsnC family transcriptional regulator	5283		RHE_RS27470	10		SMa0246	-	SMa0246	NP_435376.2	236	COG2186	K	GntR family transcriptional regulator (plasmid)	3493		SMa0246	8												SMc01182
RHE_RS27185	p42f	-	RHE_RS27185	COG0583	K	LysR family transcriptional regulator	5227		RHE_RS27185	13		RHE_RS23110	p42c	-	RHE_RS23110	COG1309	K	TetR/AcrR family transcriptional regulator	4423		RHE_RS23110	11		SMa0815	nifA	SMa0815	NP_435689.2	541	COG3604	KT	Fis family transcriptional regulator (plasmid)	3803		SMa0815	4												SMc02087
RHE_RS17450	chr	-	RHE_RS17450	COG1609	K	LacI family transcriptional regulator	3353		RHE_RS17450	11		RHE_RS18135	chr	-	RHE_RS18135	COG2204	T	sigma-54-dependent Fis family transcriptional regulator	3489		RHE_RS18135	13		SMa0402	-	SMa0402	NP_435460.1	243	COG2188	K	GntR family transcriptional regulator (plasmid)	3577		SMa0402	4												SMc02350
RHE_RS05790	chr	-	RHE_RS05790	COG1959	K	Rrf2 family transcriptional regulator	1110		RHE_RS05790	13		RHE_RS17450	chr	-	RHE_RS17450	COG1609	K	LacI family transcriptional regulator	3353		RHE_RS17450	6		SMc01664	-	SMc01664	NP_386382.1	281	COG0583	K	transcriptional regulator	2285		SMc01664	6												SM_b21333
RHE_RS13070	chr	-	RHE_RS13070	COG3279	KT	response regulator	2520		RHE_RS13070	17		RHE_RS01410	chr	-	RHE_RS01410	COG1846	K	MarR family transcriptional regulator	268		RHE_RS01410	10		SMa1067	-	SMa1067	NP_435824.1	248	COG0664	T	transcriptional regulator (plasmid)	3941		SMa1067	4												SM_b21442
RHE_RS26695	p42f	-	RHE_RS26695	COG1595	K	RNA polymerase subunit sigma-70	5129		RHE_RS26695	19		RHE_RS02400	chr	-	RHE_RS02400	COG1309	K	TetR/AcrR family transcriptional regulator	456		RHE_RS02400	14		SMc02429	-	SMc02429	NP_386710.2	302	COG0583	K	transcriptional regulator	2614		SMc02429	4												SM_b21647
RHE_RS17055	chr	-	RHE_RS17055	COG0745	TK	response regulator	3282		RHE_RS17055	15		RHE_RS17135	chr	-	RHE_RS17135	COG0583	K	LysR family transcriptional regulator	3298		RHE_RS17135	9		SMa1736	-	SMa1736	NP_436202.1	293	COG0583	K	LysR family transcriptional regulator (plasmid)	4317		SMa1736	6												SMa2049	2
RHE_RS06215	chr	-	RHE_RS06215	COG1609	K	LacI family DNA-binding transcriptional regulator	1192		RHE_RS06215	18		RHE_RS26235	p42e	-	RHE_RS26235	COG4977	K	GlxA family transcriptional regulator	5038		RHE_RS26235	7		SMa2004	-	SMa2004	NP_436344.1	357	COG1846	K	ROK family transcriptional regulator (plasmid)	4456		SMa2004	5												SMc01184
RHE_RS21900	p42a	-	RHE_RS21900	COG1396	K	XRE family transcriptional regulator	4192		RHE_RS21900	14		RHE_RS14355	chr	-	RHE_RS14355	COG0583	K	LysR family transcriptional regulator	2761		RHE_RS14355	11		SMc02175	-	SMc02175	NP_384578.1	234	COG0664	T	transcriptional regulator	473		SMc02175	11												SMc00041
RHE_RS02315	chr	-	RHE_RS02315	COG0457	R	transcriptional regulator	440		RHE_RS02315	14		RHE_RS12325	chr	-	RHE_RS12325	COG0745	TK	DNA-binding response regulator	2380		RHE_RS12325	9		SMa2387	-	SMa2387	NP_436536.2	232	COG1309	K	TetR family transcriptional regulator (plasmid)	4645		SMa2387	6												SM_b20047
RHE_RS21915	p42a	-	RHE_RS21915	COG2771	K	LuxR family transcriptional regulator	4195		RHE_RS21915	13		RHE_RS16120	chr	-	RHE_RS16120	COG1609	K	LacI family DNA-binding transcriptional regulator	3101		RHE_RS16120	12		SMc01139	rpoN	SMc01139	NP_384487.1	514	COG1508	K	RNA polymerase factor sigma-54	382		SMc01139	8												SMa0625
RHE_RS05855	chr	-	RHE_RS05855	COG1349	KG	DeoR/GlpR transcriptional regulator	1122		RHE_RS05855	18		RHE_RS13770	chr	-	RHE_RS13770	COG0583	K	LysR family transcriptional regulator	2650		RHE_RS13770	10		SMc01330	-	SMc01330	NP_385441.1	313	COG0583	K	transcriptional regulator	1340		SMc01330	8												SMc01728	4
RHE_RS22770	p42b	-	RHE_RS22770	COG2169	L	AraC family transcriptional regulator	4358		RHE_RS22770	10		RHE_RS18900	chr	-	RHE_RS18900	COG2186	K	FadR family transcriptional regulator	3641		RHE_RS18900	13		SMc03210	-	SMc03210	NP_387047.1	159	COG1522	K	transcriptional regulator	2950		SMc03210	6												SMa0825
RHE_RS19750	chr	-	RHE_RS19750	COG0640	K	ArsR family transcriptional regulator	3801		RHE_RS19750	18		RHE_RS12415	chr	-	RHE_RS12415	COG0640	K	transcriptional regulator	2398		RHE_RS12415	7		SMc01630	-	SMc01630	NP_386348.1	267	COG2197	TK	transcriptional regulator	2251		SMc01630	6												SMa2009
RHE_RS12325	chr	-	RHE_RS12325	COG0745	TK	DNA-binding response regulator	2380		RHE_RS12325	15		RHE_RS24110	p42e	-	RHE_RS24110	COG1609	K	LacI family transcriptional regulator	4621		RHE_RS24110	9		SMc02140	phoB	SMc02140	NP_384621.1	227	COG0745	TK	phosphate regulon transcriptional regulatory protein	516		SMc02140	10												SMc00529
RHE_RS16670	chr	-	RHE_RS16670	COG1309	K	TetR/AcrR family transcriptional regulator	3207		RHE_RS16670	13		RHE_RS04645	chr	-	RHE_RS04645	COG2771	K	helix-turn-helix transcriptional regulator	891		RHE_RS04645	10		SMc02777	-	SMc02777	NP_384123.1	292	COG1802	K	transcriptional regulator	17		SMc02777	8												SM_b20673
RHE_RS16120	chr	-	RHE_RS16120	COG1609	K	LacI family DNA-binding transcriptional regulator	3101		RHE_RS16120	13		RHE_RS12915	chr	-	RHE_RS12915	COG4977	K	GlxA family transcriptional regulator	2491		RHE_RS12915	7		SMc02235	-	SMc02235	NP_384645.1	78	COG1522	K	transcriptional regulator	540		SMc02235	7												SM_b20818
RHE_RS19300	chr	-	RHE_RS19300	COG1309	K	TetR/AcrR family transcriptional regulator	3714		RHE_RS19300	15		RHE_RS03210	chr	-	RHE_RS03210	COG1396	K	XRE family transcriptional regulator	612		RHE_RS03210	8		SMc04264	-	SMc04264	NP_386040.1	296	COG2207	K	transcriptional regulator	1941		SMc04264	9												SM_b20717	4
RHE_RS09445	chr	-	RHE_RS09445	COG1309	K	TetR/AcrR family transcriptional regulator	1822		RHE_RS09445	10		RHE_RS13235	chr	-	RHE_RS13235	COG1733	K	transcriptional regulator	2551		RHE_RS13235	10																									SM_b20615
												RHE_RS03275	chr	-	RHE_RS03275	COG2771	K	LuxR family transcriptional regulator	625		RHE_RS03275	9												Capa11													SM_b20827
Level_11									Capa11																									SM_b20999													SMc01456
RHE_RS33140	p42d	-	RHE_RS33140			nitrogen fixation transcriptional regulator protein	5940		RHE_RS33140	16		Level_13									Capa13													SM_b21317													SMa0690
RHE_RS10640	chr	-	RHE_RS10640	COG1802	K	GntR family transcriptional regulator	2054		RHE_RS10640	11		RHE_RS05315	chr	-	RHE_RS05315	COG0745	TK	DNA-binding response regulator	1022		RHE_RS05315	10												SMc00947													SMa1211
RHE_RS06105	chr	-	RHE_RS06105	COG0583	K	LysR family transcriptional regulator	1170		RHE_RS06105	12		RHE_RS30095	p42d	-	RHE_RS30095	COG2207	K	AraC family transcriptional regulator	5794		RHE_RS30095	12												SMc00983													SMc03252
RHE_RS06465	chr	-	RHE_RS06465	COG1309	K	TetR family transcriptional regulator	1242		RHE_RS06465	9		RHE_RS33140	p42d	-	RHE_RS33140			nitrogen fixation transcriptional regulator protein	5940		RHE_RS33140	12												SMc01108													SM_b20843
RHE_RS28695	p42f	-	RHE_RS28695	COG2207	K	AraC family transcriptional regulator	5523		RHE_RS28695	18		RHE_RS19670	chr	-	RHE_RS19670	COG1609	K	LacI family transcriptional regulator	3786		RHE_RS19670	4												SMc02498													SMa0667
RHE_RS32435	p42d	-	RHE_RS32435			transcriptional regulator	5678		RHE_RS32435	12		RHE_RS27050	p42f	-	RHE_RS27050	COG0664	T	Crp/Fnr family transcriptional regulator	5197		RHE_RS27050	5												SMc03005													SMa0751
RHE_RS32555	p42d	-	RHE_RS32555	COG2207	K	AraC family transcriptional regulator	5761		RHE_RS32555	9		RHE_RS06135	chr	-	RHE_RS06135	COG1309	K	TetR/AcrR family transcriptional regulator	1176		RHE_RS06135	11												SM_b20020													SMc01995
RHE_RS32370	p42f	-	RHE_RS32370	COG1595	K	RNA polymerase sigma factor	5550		RHE_RS32370	12		RHE_RS14920	chr	-	RHE_RS14920	COG0784	T	response regulator	2872		RHE_RS14920	11												SM_b21491													SMc02162
RHE_RS05265	chr	-	RHE_RS05265			DNA-directed RNA polymerase sigma-70 factor	1012		RHE_RS05265	10		RHE_RS32435	p42d	-	RHE_RS32435			transcriptional regulator	5678		RHE_RS32435	6												SMc01010													SMc03253
RHE_RS23325	p42c	-	RHE_RS23325	COG4566	TK	DNA-binding response regulator	4469		RHE_RS23325	12		RHE_RS30570	p42d	-	RHE_RS30570	COG1396	K	XRE family transcriptional regulator	5883		RHE_RS30570	6												SMc02818													SM_b20819
RHE_RS31500	chr	-	RHE_RS31500			MurR/RpiR family transcriptional regulator	1186		RHE_RS31500	9		RHE_RS32555	p42d	-	RHE_RS32555	COG2207	K	AraC family transcriptional regulator	5761		RHE_RS32555	7												SMc02897													SM_b20820
RHE_RS10485	chr	-	RHE_RS10485	COG0583	K	LysR family transcriptional regulator	2022		RHE_RS10485	10		RHE_RS20110	chr	-	RHE_RS20110	COG1595	K	RNA polymerase sigma factor RpoE	3873		RHE_RS20110	8												SMc03830													SM_b21295
RHE_RS11075	chr	-	RHE_RS11075	COG1309	K	TetR family transcriptional regulator	2139		RHE_RS11075	9		RHE_RS22090	p42b	-	RHE_RS22090	COG1349	KG	DeoR/GlpR transcriptional regulator	4228		RHE_RS22090	7												SMc03874													SMa0319	5
RHE_RS30790	p42d	-	RHE_RS30790	COG0583	K	LysR family transcriptional regulator	5919		RHE_RS30790	7		RHE_RS31500	chr	-	RHE_RS31500			MurR/RpiR family transcriptional regulator	1186		RHE_RS31500	12												SMc00618													SMc01551
RHE_RS05215	chr	-	RHE_RS05215	COG1733	K	transcriptional regulator	1003		RHE_RS05215	9		RHE_RS08785	chr	-	RHE_RS08785	COG1609	K	LacI family DNA-binding transcriptional regulator	1692		RHE_RS08785	10												SMc00720													SM_b21210	3
RHE_RS14905	chr	-	RHE_RS14905	COG2771	K	LuxR family transcriptional regulator	2869		RHE_RS14905	5		RHE_RS21355	p42a	-	RHE_RS21355	COG0745	TK	DNA-binding response regulator	4111		RHE_RS21355	10												SMc02063													SMc01443
RHE_RS27570	p42f	-	RHE_RS27570	COG2002	KV	AbrB family transcriptional regulator	5302		RHE_RS27570	10		RHE_RS24760	p42e	-	RHE_RS24760	COG0583	K	LysR family transcriptional regulator	4752		RHE_RS24760	10												SMc02737													SM_b21300
RHE_RS29075	p42f	-	RHE_RS29075	COG0664	T	nitrogen fixation transcriptional regulator protein	5595		RHE_RS29075	12		RHE_RS02045	chr	rpoN	RHE_RS02045	COG1508	K	RNA polymerase sigma-54 factor	390		RHE_RS02045	9												SMc03879													SMc00800
RHE_RS03180	chr	-	RHE_RS03180	COG2197	TK	helix-turn-helix transcriptional regulator	606		RHE_RS03180	13		RHE_RS15210	chr	-	RHE_RS15210	COG1522	K	Lrp/AsnC family transcriptional regulator	2929		RHE_RS15210	9												SMa1927													SMc02391
RHE_RS05315	chr	-	RHE_RS05315	COG0745	TK	DNA-binding response regulator	1022		RHE_RS05315	14		RHE_RS09025	chr	-	RHE_RS09025	COG0583	K	LysR family transcriptional regulator	1739		RHE_RS09025	10												SMc01202													SMa2167
RHE_RS09015	chr	-	RHE_RS09015	COG1309	K	TetR/AcrR family transcriptional regulator	1737		RHE_RS09015	10		RHE_RS11075	chr	-	RHE_RS11075	COG1309	K	TetR family transcriptional regulator	2139		RHE_RS11075	11												SMc01350													SMc03101
RHE_RS27470	p42f	-	RHE_RS27470	COG1522	K	Lrp/AsnC family transcriptional regulator	5283		RHE_RS27470	8		RHE_RS30745	p42d	-	RHE_RS30745			transcriptional regulator	5912		RHE_RS30745	11												SMc01769													SM_b20232
RHE_RS10445	chr	-	RHE_RS10445	COG2207	K	AraC family transcriptional regulator	2014		RHE_RS10445	12		RHE_RS29205	p42f	-	RHE_RS29205	COG4566	TK	DNA-binding response regulator	5621		RHE_RS29205	7												SMc02484													SM_b20465
RHE_RS13800	chr	-	RHE_RS13800	COG1309	K	TetR/AcrR family transcriptional regulator	2656		RHE_RS13800	13		RHE_RS05415	chr	-	RHE_RS05415	COG0583	K	LysR family transcriptional regulator	1039		RHE_RS05415	8												SMc03941													SMc00766	3
RHE_RS20460	chr	-	RHE_RS20460	COG2197	TK	LuxR family transcriptional regulator	3944		RHE_RS20460	13		RHE_RS23555	p42c	-	RHE_RS23555	COG1609	K	LacI family DNA-binding transcriptional regulator	4511		RHE_RS23555	11												SMc01215													SMc02351
RHE_RS26875	p42f	-	RHE_RS26875	COG1609	K	LacI family DNA-binding transcriptional regulator	5164		RHE_RS26875	9		RHE_RS02600	chr	phoB	RHE_RS02600	COG0745	TK	phosphate regulon transcriptional regulatory protein PhoB	496		RHE_RS02600	9												SMc01875													SMc01450
RHE_RS05380	chr	-	RHE_RS05380			CopG family transcriptional regulator	1033		RHE_RS05380	10		RHE_RS05000	chr	-	RHE_RS05000	COG0583	K	LysR family transcriptional regulator	959		RHE_RS05000	9												SMc02160													SM_b21400
RHE_RS30470	p42d	-	RHE_RS30470	COG0664	T	Crp/Fnr family transcriptional regulator	5862		RHE_RS30470	10		RHE_RS18035	chr	-	RHE_RS18035	COG0640	K	ArsR family transcriptional regulator	3469		RHE_RS18035	9												SMc04226													SM_b21683
RHE_RS03040	chr	-	RHE_RS03040	COG1309	K	TetR/AcrR family transcriptional regulator	578		RHE_RS03040	6		RHE_RS26115	p42e	-	RHE_RS26115	COG2186	K	FadR family transcriptional regulator	5012		RHE_RS26115	11												SMc00067													SMa1339
RHE_RS18340	chr	-	RHE_RS18340	COG0745	TK	DNA-binding response regulator	3530		RHE_RS18340	8		RHE_RS01740	chr	-	RHE_RS01740	COG0583	K	LysR family transcriptional regulator	329		RHE_RS01740	7												SMc00140													SMc01488
RHE_RS23130	p42c	-	RHE_RS23130	COG0745	TK	DNA-binding response regulator	4427		RHE_RS23130	12		RHE_RS02855	chr	-	RHE_RS02855	COG1309	K	TetR family transcriptional regulator	544		RHE_RS02855	7												SMc00293													SMc02229
RHE_RS23470	p42c	-	RHE_RS23470	COG4977	K	GlxA family transcriptional regulator	4494		RHE_RS23470	9		RHE_RS06555	chr	-	RHE_RS06555	COG1309	K	TetR/AcrR family transcriptional regulator	1259		RHE_RS06555	5												SMc00554													SMc01981
RHE_RS26800	p42f	-	RHE_RS26800	COG0784	T	response regulator	5149		RHE_RS26800	11		RHE_RS23065	p42c	-	RHE_RS23065	COG1802	K	GntR family transcriptional regulator	4416		RHE_RS23065	8												SMc00703													SMa0753
RHE_RS30095	p42d	-	RHE_RS30095	COG2207	K	AraC family transcriptional regulator	5794		RHE_RS30095	10		RHE_RS17840	chr	-	RHE_RS17840	COG1396	K	XRE family transcriptional regulator	3430		RHE_RS17840	5												SMc01781													SMc01118
RHE_RS26290	p42e	-	RHE_RS26290	COG1476	K	XRE family transcriptional regulator	5049		RHE_RS26290	17		RHE_RS11690	chr	-	RHE_RS11690	COG0271	T	BolA family transcriptional regulator	2259		RHE_RS11690	8												SMc01782													SMc04161
RHE_RS29840	p42d	-	RHE_RS29840	COG1802	K	GntR family transcriptional regulator	5746		RHE_RS29840	10		RHE_RS29835	p42d	-	RHE_RS29835	COG1813	J	XRE family transcriptional regulator	5745		RHE_RS29835	9												SMc02094													SM_b20521
RHE_RS26115	p42e	-	RHE_RS26115	COG2186	K	FadR family transcriptional regulator	5012		RHE_RS26115	13		RHE_RS23130	p42c	-	RHE_RS23130	COG0745	TK	DNA-binding response regulator	4427		RHE_RS23130	8												SMc02103													SMc00949
RHE_RS13695	chr	-	RHE_RS13695	COG0583	K	LysR family transcriptional regulator	2634		RHE_RS13695	7		RHE_RS03040	chr	-	RHE_RS03040	COG1309	K	TetR/AcrR family transcriptional regulator	578		RHE_RS03040	8												SMc04252													SMc01004
RHE_RS14920	chr	-	RHE_RS14920	COG0784	T	response regulator	2872		RHE_RS14920	7		RHE_RS30285	p42d	-	RHE_RS30285			XRE family transcriptional regulator	5829		RHE_RS30285	10												SMc00191													SMc02113
RHE_RS21355	p42a	-	RHE_RS21355	COG0745	TK	DNA-binding response regulator	4111		RHE_RS21355	15		RHE_RS23470	p42c	-	RHE_RS23470	COG4977	K	GlxA family transcriptional regulator	4494		RHE_RS23470	9												SMc01163													SMc04319
RHE_RS04310	chr	-	RHE_RS04310	COG1414	K	IclR family transcriptional regulator	825		RHE_RS04310	15		RHE_RS26800	p42f	-	RHE_RS26800	COG0784	T	response regulator	5149		RHE_RS26800	6												SMc04251													SMa0773
RHE_RS29400	p42f	-	RHE_RS29400	COG1846	K	ROK family transcriptional regulator	5660		RHE_RS29400	11		RHE_RS23665	p42c	-	RHE_RS23665	COG1846	K	MarR family transcriptional regulator	4534		RHE_RS23665	8												SMc00159													SMa0193
RHE_RS29195	p42f	-	RHE_RS29195	COG0745	TK	DNA-binding response regulator	5619		RHE_RS29195	17		RHE_RS12520	chr	-	RHE_RS12520	COG0583	K	LysR family transcriptional regulator	2416		RHE_RS12520	10												SMc00551													SMc04337
RHE_RS12920	chr	-	RHE_RS12920	COG0745	TK	diguanylate cyclase response regulator	2492		RHE_RS12920	18		RHE_RS12920	chr	-	RHE_RS12920	COG0745	TK	diguanylate cyclase response regulator	2492		RHE_RS12920	12												SMc00786													SMc00251
RHE_RS29080	p42f	-	RHE_RS29080	COG0784	T	hybrid sensor histidine kinase/response regulator	5596		RHE_RS29080	5		RHE_RS14150	chr	-	RHE_RS14150	COG1309	K	TetR/AcrR family transcriptional regulator	2722		RHE_RS14150	13												SMc01292													SMc03780
RHE_RS12035	chr	-	RHE_RS12035	COG1737	K	MurR/RpiR family transcriptional regulator	2326		RHE_RS12035	13		RHE_RS23020	p42c	-	RHE_RS23020	COG3609	K	transcriptional regulator	4407		RHE_RS23020	10												SMc01801													SMa1201
RHE_RS26465	p42f	-	RHE_RS26465	COG0583	K	LysR family transcriptional regulator	5083		RHE_RS26465	7		RHE_RS03430	chr	-	RHE_RS03430	COG0745	TK	DNA-binding response regulator	656		RHE_RS03430	7												SMc02058													SM_b20953
RHE_RS01480	chr	-	RHE_RS01480	COG2207	K	AraC family transcriptional regulator	280		RHE_RS01480	19		RHE_RS08350	chr	-	RHE_RS08350	COG0784	T	response regulator	1610		RHE_RS08350	13												SMc02059													SMa0661
RHE_RS01740	chr	-	RHE_RS01740	COG0583	K	LysR family transcriptional regulator	329		RHE_RS01740	10		RHE_RS04030	chr	-	RHE_RS04030	COG0583	K	LysR family transcriptional regulator	769		RHE_RS04030	13												SMc03061													SMa0772
RHE_RS28510	p42f	-	RHE_RS28510	COG1802	K	GntR family transcriptional regulator	5488		RHE_RS28510	10		RHE_RS15995	chr	-	RHE_RS15995	COG0583	K	LysR family transcriptional regulator	3077		RHE_RS15995	6												SMc03846													SMc00672
RHE_RS28665	p42f	-	RHE_RS28665			GntR family transcriptional regulator	5517		RHE_RS28665	9		RHE_RS05735	chr	-	RHE_RS05735	COG0583	K	LysR family transcriptional regulator	1099		RHE_RS05735	10												SMc00604													SMc00116
RHE_RS25835	p42e	-	RHE_RS25835	COG2186	K	FadR family transcriptional regulator	4958		RHE_RS25835	9		RHE_RS15040	chr	-	RHE_RS15040	COG0664	T	Crp/Fnr family transcriptional regulator	2895		RHE_RS15040	9												SMc00643													SMc02524
RHE_RS28555	p42f	-	RHE_RS28555	COG1309	K	TetR/AcrR family transcriptional regulator	5497		RHE_RS28555	14		RHE_RS09080	chr	-	RHE_RS09080	COG3806	T	transcriptional regulator	1749		RHE_RS09080	5												SMc01136													SMc01724
RHE_RS28625	p42f	-	RHE_RS28625	COG1595	K	RNA polymerase sigma factor	5511		RHE_RS28625	10		RHE_RS13190	chr	-	RHE_RS13190	COG1733	K	transcriptional regulator	2544		RHE_RS13190	10												SM_b20072													SMa0810
RHE_RS15040	chr	-	RHE_RS15040	COG0664	T	Crp/Fnr family transcriptional regulator	2895		RHE_RS15040	10		RHE_RS15675	chr	-	RHE_RS15675	COG1595	K	RNA polymerase sigma factor	3016		RHE_RS15675	9												SM_b20712													SM_b20522
RHE_RS28450	p42f	-	RHE_RS28450	COG0583	K	LysR family transcriptional regulator	5476		RHE_RS28450	10		RHE_RS13800	chr	-	RHE_RS13800	COG1309	K	TetR/AcrR family transcriptional regulator	2656		RHE_RS13800	8												SM_b20899													SMa0229
RHE_RS02045	chr	rpoN	RHE_RS02045	COG1508	K	RNA polymerase sigma-54 factor	390		RHE_RS02045	13		RHE_RS13215	chr	-	RHE_RS13215	COG1309	K	TetR/AcrR family transcriptional regulator	2547		RHE_RS13215	9												SMa2379													SMa1169
RHE_RS28340	p42f	-	RHE_RS28340	COG1802	K	GntR family transcriptional regulator	5454		RHE_RS28340	6		RHE_RS13695	chr	-	RHE_RS13695	COG0583	K	LysR family transcriptional regulator	2634		RHE_RS13695	5												SMc01164													SMa1082
RHE_RS16815	chr	-	RHE_RS16815	COG0583	K	LysR family transcriptional regulator	3235		RHE_RS16815	13		RHE_RS11860	chr	-	RHE_RS11860	COG2207	K	AraC family transcriptional regulator	2293		RHE_RS11860	5												SMc01165													SMa1100
RHE_RS28220	p42f	-	RHE_RS28220	COG1609	K	LacI family DNA-binding transcriptional regulator	5431		RHE_RS28220	6		RHE_RS00285	chr	-	RHE_RS00285	COG4567	TK	DNA-binding response regulator	55		RHE_RS00285	6												SMc01909													SMa1231
RHE_RS24850	p42e	-	RHE_RS24850	COG1917	R	AraC family transcriptional regulator	4768		RHE_RS24850	10		RHE_RS15225	chr	-	RHE_RS15225	COG0640	K	transcriptional regulator	2932		RHE_RS15225	7												SMc03104													SMc02589
RHE_RS26795	p42f	-	RHE_RS26795	COG0784	T	response regulator	5148		RHE_RS26795	12		RHE_RS29400	p42f	-	RHE_RS29400	COG1846	K	ROK family transcriptional regulator	5660		RHE_RS29400	11												SMc00362													SMc00942
RHE_RS18650	chr	-	RHE_RS18650	COG1609	K	LacI family transcriptional regulator	3591		RHE_RS18650	2		RHE_RS01095	chr	-	RHE_RS01095	COG1846	K	MarR family transcriptional regulator	206		RHE_RS01095	6												SMc04410													SMc03794
RHE_RS07105	chr	-	RHE_RS07105	COG0664	T	Crp/Fnr family transcriptional regulator	1370		RHE_RS07105	15		RHE_RS05265	chr	-	RHE_RS05265			DNA-directed RNA polymerase sigma-70 factor	1012		RHE_RS05265	8												SM_b20263													SMa1893	2
RHE_RS27845	p42f	-	RHE_RS27845	COG1522	K	Lrp/AsnC family transcriptional regulator	5358		RHE_RS27845	3		RHE_RS10445	chr	-	RHE_RS10445	COG2207	K	AraC family transcriptional regulator	2014		RHE_RS10445	6												SM_b21181													SM_b20914
RHE_RS27750	p42f	-	RHE_RS27750	COG1609	K	LacI family transcriptional regulator	5337		RHE_RS27750	8		RHE_RS16815	chr	-	RHE_RS16815	COG0583	K	LysR family transcriptional regulator	3235		RHE_RS16815	8												SMc00638													SMc03256
RHE_RS03775	chr	-	RHE_RS03775	COG1595	K	RNA polymerase sigma factor	721		RHE_RS03775	15		RHE_RS01265	chr	-	RHE_RS01265	COG1396	K	XRE family transcriptional regulator	239		RHE_RS01265	10												SMc00821													SMc01228
RHE_RS09080	chr	-	RHE_RS09080	COG3806	T	transcriptional regulator	1749		RHE_RS09080	10		RHE_RS12990	chr	-	RHE_RS12990	COG1846	K	MarR family transcriptional regulator	2505		RHE_RS12990	7												SMc01296													SM_b20331
RHE_RS26635	p42f	-	RHE_RS26635	COG2186	K	transcriptional regulator NanR	5117		RHE_RS26635	8		RHE_RS14115	chr	-	RHE_RS14115	COG4977	K	AraC family transcriptional regulator	2715		RHE_RS14115	6												SMc01777													SMc00277
RHE_RS06555	chr	-	RHE_RS06555	COG1309	K	TetR/AcrR family transcriptional regulator	1259		RHE_RS06555	8		RHE_RS24850	p42e	-	RHE_RS24850	COG1917	R	AraC family transcriptional regulator	4768		RHE_RS24850	7												SMc01871													SMc04408
RHE_RS15225	chr	-	RHE_RS15225	COG0640	K	transcriptional regulator	2932		RHE_RS15225	12		RHE_RS07105	chr	-	RHE_RS07105	COG0664	T	Crp/Fnr family transcriptional regulator	1370		RHE_RS07105	9												SMc03131													SMc00458	3
RHE_RS22020	p42b	-	RHE_RS22020	COG1802	K	GntR family transcriptional regulator	4215		RHE_RS22020	12		RHE_RS27845	p42f	-	RHE_RS27845	COG1522	K	Lrp/AsnC family transcriptional regulator	5358		RHE_RS27845	5												SMc04323													SMc01106
RHE_RS07480	chr	-	RHE_RS07480	COG1309	K	TetR/AcrR family transcriptional regulator	1446		RHE_RS07480	11		RHE_RS05750	chr	-	RHE_RS05750	COG0583	K	LysR family transcriptional regulator	1102		RHE_RS05750	9												SMa1698													SMc01229
RHE_RS27310	p42f	-	RHE_RS27310	COG1309	K	TetR/AcrR family transcriptional regulator	5253		RHE_RS27310	9		RHE_RS27750	p42f	-	RHE_RS27750	COG1609	K	LacI family transcriptional regulator	5337		RHE_RS27750	6												SMc00791													SM_b20255
RHE_RS14100	chr	-	RHE_RS14100	COG2390	K	sugar-binding transcriptional regulator	2712		RHE_RS14100	13		RHE_RS19545	chr	-	RHE_RS19545	COG0271	T	BolA family transcriptional regulator	3762		RHE_RS19545	10												SMc00916													SMc00280
RHE_RS17145	chr	-	RHE_RS17145	COG0583	K	LysR family transcriptional regulator	3300		RHE_RS17145	12		RHE_RS26635	p42f	-	RHE_RS26635	COG2186	K	transcriptional regulator NanR	5117		RHE_RS26635	5												SMc00964													SMc01199
RHE_RS26040	p42e	-	RHE_RS26040	COG1737	K	MurR/RpiR family transcriptional regulator	4998		RHE_RS26040	10		RHE_RS26040	p42e	-	RHE_RS26040	COG1737	K	MurR/RpiR family transcriptional regulator	4998		RHE_RS26040	5												SMc01309													SM_b20484
RHE_RS17135	chr	-	RHE_RS17135	COG0583	K	LysR family transcriptional regulator	3298		RHE_RS17135	12		RHE_RS27310	p42f	-	RHE_RS27310	COG1309	K	TetR/AcrR family transcriptional regulator	5253		RHE_RS27310	8												SMc01428													SMc00886
RHE_RS27050	p42f	-	RHE_RS27050	COG0664	T	Crp/Fnr family transcriptional regulator	5197		RHE_RS27050	10		RHE_RS18680	chr	-	RHE_RS18680	COG1309	K	TetR/AcrR family transcriptional regulator	3597		RHE_RS18680	5												SMc02764													SMc00994	2
RHE_RS26840	p42f	-	RHE_RS26840	COG0784	T	response regulator	5157		RHE_RS26840	7		RHE_RS25060	p42e	-	RHE_RS25060	COG1414	K	IclR family transcriptional regulator	4808		RHE_RS25060	10												SMc03801													SMc00938
RHE_RS23350	p42c	-	RHE_RS23350	COG1609	K	LacI family transcriptional regulator	4473		RHE_RS23350	6		RHE_RS04025	chr	-	RHE_RS04025	COG1309	K	TetR/AcrR family transcriptional regulator	768		RHE_RS04025	10												SMc04115													SMc02980
RHE_RS12205	chr	-	RHE_RS12205	COG1846	K	MarR family transcriptional regulator	2360		RHE_RS12205	9		RHE_RS09445	chr	-	RHE_RS09445	COG1309	K	TetR/AcrR family transcriptional regulator	1822		RHE_RS09445	9												SM_b20808													SM_b21640
RHE_RS14055	chr	-	RHE_RS14055	COG1309	K	TetR/AcrR family transcriptional regulator	2704		RHE_RS14055	9		RHE_RS23885	p42c	-	RHE_RS23885	COG0583	K	LysR family transcriptional regulator	4578		RHE_RS23885	8												SMc00009													SM_b20231
RHE_RS13190	chr	-	RHE_RS13190	COG1733	K	transcriptional regulator	2544		RHE_RS13190	11		RHE_RS26840	p42f	-	RHE_RS26840	COG0784	T	response regulator	5157		RHE_RS26840	6												SMc02093													SMa1910
RHE_RS01475	chr	-	RHE_RS01475	COG0583	K	LysR family transcriptional regulator	279		RHE_RS01475	11		RHE_RS23350	p42c	-	RHE_RS23350	COG1609	K	LacI family transcriptional regulator	4473		RHE_RS23350	4												SMc02147													SMc02406
RHE_RS26355	p42e	-	RHE_RS26355	COG1879	G	LacI family DNA-binding transcriptional regulator	5062		RHE_RS26355	9		RHE_RS23540	p42c	-	RHE_RS23540	COG1595	K	RNA polymerase sigma factor	4508		RHE_RS23540	4												SMc04405													SMc02140	2
RHE_RS05170	chr	-	RHE_RS05170	COG1309	K	TetR/AcrR family transcriptional regulator	994		RHE_RS05170	6		RHE_RS12205	chr	-	RHE_RS12205	COG1846	K	MarR family transcriptional regulator	2360		RHE_RS12205	7												SMc01588													SMc02374
RHE_RS02710	chr	-	RHE_RS02710	COG2932	X	helix-turn-helix transcriptional regulator	515		RHE_RS02710	13		RHE_RS05170	chr	-	RHE_RS05170	COG1309	K	TetR/AcrR family transcriptional regulator	994		RHE_RS05170	4												SMc02438													SMc02175	1
RHE_RS06705	chr	-	RHE_RS06705	COG1522	K	Lrp/AsnC family transcriptional regulator	1289		RHE_RS06705	9		RHE_RS12035	chr	-	RHE_RS12035	COG1737	K	MurR/RpiR family transcriptional regulator	2326		RHE_RS12035	8												SMc02884													SMc02261	3
RHE_RS23065	p42c	-	RHE_RS23065	COG1802	K	GntR family transcriptional regulator	4416		RHE_RS23065	8		RHE_RS03775	chr	-	RHE_RS03775	COG1595	K	RNA polymerase sigma factor	721		RHE_RS03775	11												SMc03899													SMc00118
RHE_RS26070	p42e	-	RHE_RS26070	COG2207	K	AraC family transcriptional regulator	5004		RHE_RS26070	15		RHE_RS02165	chr	-	RHE_RS02165	COG0640	K	ArsR family transcriptional regulator	414		RHE_RS02165	10												SM_b20262													SMa0462
RHE_RS04645	chr	-	RHE_RS04645	COG2771	K	helix-turn-helix transcriptional regulator	891		RHE_RS04645	11		RHE_RS14770	chr	-	RHE_RS14770	COG1737	K	MurR/RpiR family transcriptional regulator	2842		RHE_RS14770	10												SMc00492													SMc01497
RHE_RS23540	p42c	-	RHE_RS23540	COG1595	K	RNA polymerase sigma factor	4508		RHE_RS23540	9		RHE_RS25290	p42e	-	RHE_RS25290	COG2186	K	FadR family transcriptional regulator	4851		RHE_RS25290	6												SMc00690													SMc02778
RHE_RS25840	p42e	-	RHE_RS25840	COG2186	K	FadR family transcriptional regulator	4959		RHE_RS25840	4		RHE_RS18835	chr	-	RHE_RS18835	COG2390	K	sugar-binding transcriptional regulator	3628		RHE_RS18835	9												SMc04230													SMc03744
RHE_RS25560	p42e	-	RHE_RS25560	COG1595	K	DNA-directed RNA polymerase sigma-70 factor	4903		RHE_RS25560	9		RHE_RS05730	chr	-	RHE_RS05730	COG1609	K	LacI family DNA-binding transcriptional regulator	1098		RHE_RS05730	9												SMc01876													SMc04313
RHE_RS14770	chr	-	RHE_RS14770	COG1737	K	MurR/RpiR family transcriptional regulator	2842		RHE_RS14770	10		RHE_RS22955	p42c	-	RHE_RS22955	COG1802	K	GntR family transcriptional regulator	4393		RHE_RS22955	7												SMc01885													SM_b21521
RHE_RS20110	chr	-	RHE_RS20110	COG1595	K	RNA polymerase sigma factor RpoE	3873		RHE_RS20110	11		RHE_RS06705	chr	-	RHE_RS06705	COG1522	K	Lrp/AsnC family transcriptional regulator	1289		RHE_RS06705	9												SMc02543
RHE_RS25290	p42e	-	RHE_RS25290	COG2186	K	FadR family transcriptional regulator	4851		RHE_RS25290	10		RHE_RS04625	chr	-	RHE_RS04625	COG1802	K	GntR family transcriptional regulator	887		RHE_RS04625	7												SMc03891
RHE_RS15210	chr	-	RHE_RS15210	COG1522	K	Lrp/AsnC family transcriptional regulator	2929		RHE_RS15210	17		RHE_RS02315	chr	-	RHE_RS02315	COG0457	R	transcriptional regulator	440		RHE_RS02315	8												SMa0089
RHE_RS24760	p42e	-	RHE_RS24760	COG0583	K	LysR family transcriptional regulator	4752		RHE_RS24760	10		RHE_RS07210	chr	-	RHE_RS07210	COG0640	K	ArsR family transcriptional regulator	1391		RHE_RS07210	4												SMc01025
RHE_RS03275	chr	-	RHE_RS03275	COG2771	K	LuxR family transcriptional regulator	625		RHE_RS03275	9		RHE_RS17170	chr	-	RHE_RS17170	COG1846	K	MarR family transcriptional regulator	3305		RHE_RS17170	7												SMc02717
RHE_RS15675	chr	-	RHE_RS15675	COG1595	K	RNA polymerase sigma factor	3016		RHE_RS15675	11		RHE_RS19300	chr	-	RHE_RS19300	COG1309	K	TetR/AcrR family transcriptional regulator	3714		RHE_RS19300	6												SMc02942
RHE_RS05735	chr	-	RHE_RS05735	COG0583	K	LysR family transcriptional regulator	1099		RHE_RS05735	12		RHE_RS18650	chr	-	RHE_RS18650	COG1609	K	LacI family transcriptional regulator	3591		RHE_RS18650	2												SMc03124
RHE_RS17170	chr	-	RHE_RS17170	COG1846	K	MarR family transcriptional regulator	3305		RHE_RS17170	11		RHE_RS12065	chr	-	RHE_RS12065	COG1609	K	LacI family transcriptional regulator	2332		RHE_RS12065	4												SMc00704
RHE_RS06825	chr	-	RHE_RS06825	COG0583	K	LysR family transcriptional regulator	1314		RHE_RS06825	11		RHE_RS15070	chr	-	RHE_RS15070	COG2207	K	AraC family transcriptional regulator	2901		RHE_RS15070	6												SMc01169
RHE_RS23885	p42c	-	RHE_RS23885	COG0583	K	LysR family transcriptional regulator	4578		RHE_RS23885	8		RHE_RS09015	chr	-	RHE_RS09015	COG1309	K	TetR/AcrR family transcriptional regulator	1737		RHE_RS09015	5												SM_b21177
RHE_RS18235	chr	-	RHE_RS18235	COG0583	K	LysR family transcriptional regulator	3509		RHE_RS18235	11		RHE_RS12620	chr	-	RHE_RS12620	COG2207	K	AraC family transcriptional regulator	2435		RHE_RS12620	5												SMa0355	1
RHE_RS22955	p42c	-	RHE_RS22955	COG1802	K	GntR family transcriptional regulator	4393		RHE_RS22955	9		RHE_RS14905	chr	-	RHE_RS14905	COG2771	K	LuxR family transcriptional regulator	2869		RHE_RS14905	3												SMc02503
RHE_RS18035	chr	-	RHE_RS18035	COG0640	K	ArsR family transcriptional regulator	3469		RHE_RS18035	12		RHE_RS02710	chr	-	RHE_RS02710	COG2932	X	helix-turn-helix transcriptional regulator	515		RHE_RS02710	4												SMc00825
RHE_RS19670	chr	-	RHE_RS19670	COG1609	K	LacI family transcriptional regulator	3786		RHE_RS19670	4																								SMc01585
RHE_RS12520	chr	-	RHE_RS12520	COG0583	K	LysR family transcriptional regulator	2416		RHE_RS12520	15											Capa14													SMa0101
RHE_RS11690	chr	-	RHE_RS11690	COG0271	T	BolA family transcriptional regulator	2259		RHE_RS11690	6											RHE_RS33365													SMc00830
RHE_RS05000	chr	-	RHE_RS05000	COG0583	K	LysR family transcriptional regulator	959		RHE_RS05000	8											RHE_RS33160													SM_b20456
RHE_RS01980	chr	-	RHE_RS01980	COG0745	TK	hybrid sensor histidine kinase/response regulator	377		RHE_RS01980	13											RHE_RS33115													SM_b20946
RHE_RS01095	chr	-	RHE_RS01095	COG1846	K	MarR family transcriptional regulator	206		RHE_RS01095	15											RHE_RS32880													SMc01231
RHE_RS12620	chr	-	RHE_RS12620	COG2207	K	AraC family transcriptional regulator	2435		RHE_RS12620	8											RHE_RS32825													SMc03027
RHE_RS07210	chr	-	RHE_RS07210	COG0640	K	ArsR family transcriptional regulator	1391		RHE_RS07210	12											RHE_RS32785													SMa0247
RHE_RS17840	chr	-	RHE_RS17840	COG1396	K	XRE family transcriptional regulator	3430		RHE_RS17840	14											RHE_RS32295													SMc00033
RHE_RS13060	chr	-	RHE_RS13060	COG0583	K	LysR family transcriptional regulator	2518		RHE_RS13060	5											RHE_RS32120													SMc00488
RHE_RS15070	chr	-	RHE_RS15070	COG2207	K	AraC family transcriptional regulator	2901		RHE_RS15070	13											RHE_RS32060													SMc00620
RHE_RS18135	chr	-	RHE_RS18135	COG2204	T	sigma-54-dependent Fis family transcriptional regulator	3489		RHE_RS18135	14											RHE_RS31950													SMc00651
RHE_RS12415	chr	-	RHE_RS12415	COG0640	K	transcriptional regulator	2398		RHE_RS12415	8											RHE_RS31120													SMc00652
																					RHE_RS31115													SMc01347
									Capa12												RHE_RS31110													SM_b20523
									RHE_RS32710												RHE_RS31105													SMc02274
									RHE_RS31670												RHE_RS31100													SMc01431
									RHE_RS31305												RHE_RS31055													SMc01918
									RHE_RS31225												RHE_RS31005													SMc02408
									RHE_RS30975												RHE_RS30775													SMc03809
									RHE_RS30900												RHE_RS30740													SM_b20292
									RHE_RS30890												RHE_RS30715													SM_b20705
									RHE_RS30830												RHE_RS30675													SMc00059
									RHE_RS30795												RHE_RS30635													SMc01104
									RHE_RS30785												RHE_RS30630													SMc03878
									RHE_RS30350												RHE_RS30545													SM_b20894
									RHE_RS30005												RHE_RS30525													SMa1587
									RHE_RS29945												RHE_RS30520													SMc00872
									RHE_RS29620												RHE_RS30505													SMc03062
									RHE_RS29525												RHE_RS30500													SMc00100
									RHE_RS29495												RHE_RS30475													SMc01294
									RHE_RS29450												RHE_RS30465													SMc01310
									RHE_RS29380												RHE_RS30305													SMc00155
									RHE_RS29170												RHE_RS30080													SM_b21479
									RHE_RS29140												RHE_RS30055													SMc00034
									RHE_RS29125												RHE_RS29990													SMc00528
									RHE_RS29085												RHE_RS29845													SMc03775
									RHE_RS29045												RHE_RS29830													SMc03881
									RHE_RS28975												RHE_RS29825													SMc04093
									RHE_RS28950												RHE_RS29820													SMc00120
									RHE_RS28885												RHE_RS29795													SMc04010
									RHE_RS28865												RHE_RS29780													SMc00176
									RHE_RS28850												RHE_RS16135	4												SMc00432
									RHE_RS28780												RHE_RS29615													SMc02163
									RHE_RS28775												RHE_RS29575													SMc04291
									RHE_RS28770												RHE_RS29445													SM_b20759
									RHE_RS28655												RHE_RS29390													SM_b21196
									RHE_RS28650												RHE_RS29270													SMc00148
									RHE_RS28550												RHE_RS29265													SMc02634
									RHE_RS28455												RHE_RS29255													SMc00150
									RHE_RS28445												RHE_RS29240													SMc02378
									RHE_RS28425												RHE_RS29190													SMc02562
									RHE_RS28420												RHE_RS29175													SMc04000
									RHE_RS28350												RHE_RS29165													SMc02910
									RHE_RS28225												RHE_RS28895													SMc02911
									RHE_RS28140												RHE_RS28880													SMc00489
									RHE_RS28070												RHE_RS28870													SMc02495
									RHE_RS28025												RHE_RS28840													SM_b20749
									RHE_RS28005												RHE_RS28730													SMc01569
									RHE_RS27970												RHE_RS28720													SMc03065
									RHE_RS27915												RHE_RS28605													SMc00508
									RHE_RS27875												RHE_RS28380													SMc01052
									RHE_RS27810												RHE_RS28190													SMc01285
									RHE_RS27745												RHE_RS28170													SMc01327
									RHE_RS27690												RHE_RS28165													SMc01845
									RHE_RS27660												RHE_RS27975													SMc03038
									RHE_RS27555												RHE_RS27880													SMc00572
									RHE_RS27520												RHE_RS27815													SMc01208
									RHE_RS27150												RHE_RS27730													SM_b20069
									RHE_RS27070												RHE_RS27715													SMc00410
									RHE_RS26950												RHE_RS27605													SMc02695
									RHE_RS26945												RHE_RS27580													SM_b20556
									RHE_RS26920												RHE_RS27465													SMc00593
									RHE_RS26890												RHE_RS27455													SMc00594
									RHE_RS26865												RHE_RS27360													SMc02404
									RHE_RS26850												RHE_RS27315													SMc02781
									RHE_RS26730												RHE_RS27305													SMc04383
									RHE_RS26610												RHE_RS27180													SMc01914
									RHE_RS26575												RHE_RS27170													SMc02098
									RHE_RS26445												RHE_RS27165													SMc01209
									RHE_RS26440												RHE_RS27075													SMc03039
									RHE_RS26435												RHE_RS26870													SM_b20448
									RHE_RS26425												RHE_RS26860													SMc00762
									RHE_RS26415												RHE_RS26750													SM_b21035
									RHE_RS26285												RHE_RS26640													SMc00300
									RHE_RS26265												RHE_RS26605													SMc01834
									RHE_RS26225												RHE_RS26515													SMc02117
									RHE_RS26210												RHE_RS26350													SMc02118
									RHE_RS26165												RHE_RS26330													SMc02240
									RHE_RS26105												RHE_RS26295													SMc02520
									RHE_RS26095												RHE_RS26275													SMc00888
									RHE_RS26050												RHE_RS26195													SMc00581
									RHE_RS26045												RHE_RS26150													SMc02073
									RHE_RS26030												RHE_RS26110													SMc02170
									RHE_RS25865												RHE_RS26100													SMc03004
									RHE_RS25855												RHE_RS25950													SMc00363
									RHE_RS25790												RHE_RS25890													SM_b21186
									RHE_RS25630												RHE_RS25805													SMc02779
									RHE_RS25545												RHE_RS25800													SMc01354
									RHE_RS25500												RHE_RS25795													SMc01719
									RHE_RS25445												RHE_RS25775													SMc01903
									RHE_RS25370												RHE_RS25740													SMc02463
									RHE_RS25320												RHE_RS25720													SMc02396
									RHE_RS25250												RHE_RS25695													SM_b21197
									RHE_RS25150												RHE_RS25640													SMc00987
									RHE_RS25065												RHE_RS25585													SMc01852
									RHE_RS24890												RHE_RS25565													SMc00485
									RHE_RS24655												RHE_RS25465													SMc02581
									RHE_RS24565												RHE_RS25335													SMc02782
									RHE_RS24480												RHE_RS25240													SM_b20873
									RHE_RS24455												RHE_RS25205													SMc01935
									RHE_RS24445												RHE_RS25180													SM_b20942
									RHE_RS24400												RHE_RS25165													SMc02838
									RHE_RS24370												RHE_RS25120													SMc02603
									RHE_RS24330												RHE_RS25035													SMc02053
									RHE_RS24270												RHE_RS25025													SMc02101
									RHE_RS24230												RHE_RS24975													SM_b21494
									RHE_RS24105												RHE_RS24860													SMc04331
									RHE_RS24075												RHE_RS24745													SM_b21600
									RHE_RS23965												RHE_RS24660													SMc02678
									RHE_RS23955												RHE_RS24615													SMc02166
									RHE_RS23935												RHE_RS24570													SMc02305
									RHE_RS23880												RHE_RS24545													SMc04305
									RHE_RS23770												RHE_RS24490													SMc00548
									RHE_RS23630												RHE_RS24425													SMc02119
									RHE_RS23585												RHE_RS24360													SMc03978
									RHE_RS23570												RHE_RS24320													SMa0809
									RHE_RS23550												RHE_RS24300													SMc00781
									RHE_RS23535												RHE_RS24290													SMc02447
									RHE_RS23500												RHE_RS24245													SMc00036
									RHE_RS23450												RHE_RS24195													SMc00570
									RHE_RS23445												RHE_RS24140													SMc00571
									RHE_RS23415												RHE_RS24100													SMc04411
									RHE_RS23385												RHE_RS24010													SMc03893
									RHE_RS23380												RHE_RS23920													SMc00088
									RHE_RS23370												RHE_RS23890													SMc00149
									RHE_RS23365												RHE_RS23865													SMc01120
									RHE_RS23190												RHE_RS23840													SMc02141
									RHE_RS23185												RHE_RS23735													SMc02296
									RHE_RS23165												RHE_RS23690													SMc04175
									RHE_RS23015												RHE_RS23680													SMc01200
									RHE_RS22940												RHE_RS23640													SMc02392
									RHE_RS22915												RHE_RS23565													SMc01152
									RHE_RS22910												RHE_RS23435													SMc00737
									RHE_RS22845												RHE_RS23360													SMc03961
									RHE_RS22735												RHE_RS23310													SMc02846
									RHE_RS22570												RHE_RS23240													SMc00105
									RHE_RS22210												RHE_RS23195													SMc00896
									RHE_RS22160												RHE_RS23105													SMc01316
									RHE_RS22060												RHE_RS23050													SMc03172
									RHE_RS21975												RHE_RS22960													SMc00017
									RHE_RS21415												RHE_RS22795													SMc00683
									RHE_RS21400												RHE_RS22790													SMc02483
									RHE_RS21275												RHE_RS22740													SMc03927
									RHE_RS21225												RHE_RS22710													SMc00409
									RHE_RS21130												RHE_RS22705													SMc00641
									RHE_RS21085												RHE_RS22640													SMc01018
									RHE_RS21080												RHE_RS22630													SMc01167
									RHE_RS21075												RHE_RS22625													SMc00655
									RHE_RS21050												RHE_RS22620													SMc00608
									RHE_RS21040												RHE_RS22610													SMc00609
									RHE_RS21035												RHE_RS22600													SMc01524
									RHE_RS21030												RHE_RS22560													SMc01904
									RHE_RS21005												RHE_RS22395													SMc02145
									RHE_RS20960												RHE_RS22260													SMc03884
									RHE_RS20930												RHE_RS22245													SMc00610
									RHE_RS20895												RHE_RS22200													SMc02479
									RHE_RS20790												RHE_RS22155													SMc04296
									RHE_RS20775												RHE_RS22145													SMc00575
									RHE_RS20770												RHE_RS22045													SMc00576
									RHE_RS20765												RHE_RS22015													SMc02242
									RHE_RS20755												RHE_RS21830													SMc00174
									RHE_RS20735												RHE_RS21825													SMc01578
									RHE_RS20725												RHE_RS21685													SMc03967
									RHE_RS20715												RHE_RS21555													SMc01333
									RHE_RS20695												RHE_RS21540													SMc01756
									RHE_RS20690												RHE_RS21445													SMc00943
									RHE_RS20655												RHE_RS21390													SMc00944
									RHE_RS20610												RHE_RS21310													SMc00333
									RHE_RS20585												RHE_RS21210													SMc01235
									RHE_RS20560												RHE_RS20950													SMc02753
									RHE_RS20550												RHE_RS20915													SMc02307
									RHE_RS20540												RHE_RS20905													SMc03862
									RHE_RS20530												RHE_RS20885													SMc00023
									RHE_RS20500												RHE_RS20850													SMc03178
									RHE_RS20485												RHE_RS20810													SMc01534
									RHE_RS20470												RHE_RS20665													SMc03859
									RHE_RS20455												RHE_RS20325													SMc04198
									RHE_RS20450												RHE_RS20080													SMc00948
									RHE_RS20405												RHE_RS20045													SMc01882
									RHE_RS20400												RHE_RS19850													SM_b20056
									RHE_RS20395												RHE_RS19830													SM_b21514
									RHE_RS20380												RHE_RS19690													SMc02796
									RHE_RS20320												RHE_RS19360													SMc02519
									RHE_RS20315												RHE_RS19335													SMc02174
									RHE_RS20295												RHE_RS19295													SMc04018
									RHE_RS20280												RHE_RS19100													SMc04286
									RHE_RS20175												RHE_RS19065													SMc01723
									RHE_RS20150												RHE_RS19045													SMc01357
									RHE_RS20140												RHE_RS18840													SM_b20755
									RHE_RS20095												RHE_RS18765													SM_b21009
									RHE_RS20070												RHE_RS18690													SM_b21010
									RHE_RS20020												RHE_RS18455													SMc00040
									RHE_RS20015												RHE_RS18370													SMc00978
									RHE_RS19970												RHE_RS18365													SMc00013
									RHE_RS19965												RHE_RS18240													SMc00289
									RHE_RS19935												RHE_RS18175													SMc01287
									RHE_RS19905												RHE_RS18140													SMc00415
									RHE_RS19890												RHE_RS17955													SMc00475
									RHE_RS19840												RHE_RS17940													SMc02686
									RHE_RS19835												RHE_RS17845													SMc03171
									RHE_RS19765												RHE_RS17830													SMc01187
									RHE_RS19725												RHE_RS17815													SMc02306
									RHE_RS19710												RHE_RS17805													SMc01127
									RHE_RS19700												RHE_RS17645													SMc02246
									RHE_RS19595												RHE_RS17515													SMc04277
									RHE_RS19590												RHE_RS17400													SMc01579
									RHE_RS19540												RHE_RS17320													SMc04112
									RHE_RS19450												RHE_RS17260													SMc01535
									RHE_RS19440												RHE_RS17240													SMc04449
									RHE_RS19375												RHE_RS17210													SM_b20806
									RHE_RS19330												RHE_RS17205													SMc01331
									RHE_RS19305												RHE_RS17180													SMc01283
									RHE_RS19275												RHE_RS17175													SMc02181
									RHE_RS19270												RHE_RS17105													SMc03772
									RHE_RS19250												RHE_RS17040													SMc00990
									RHE_RS19235												RHE_RS16970													SMc01911
									RHE_RS19205												RHE_RS16895													SMc01299
									RHE_RS19190												RHE_RS16880													SMc00813
									RHE_RS19180												RHE_RS16785													SMc02896
									RHE_RS19050												RHE_RS16765													SMc02146
									RHE_RS19035												RHE_RS16740													SMc03770
									RHE_RS19015												RHE_RS16650													SMc00494
									RHE_RS18990												RHE_RS16610													SMc02083
									RHE_RS18940												RHE_RS16590													SMc01605
									RHE_RS18935												RHE_RS16555													SMc03829
									RHE_RS18930												RHE_RS16545													SMc02636
									RHE_RS18895												RHE_RS16510													SMc02941
									RHE_RS18860												RHE_RS16475													SMc00235
									RHE_RS18845												RHE_RS16435													SMc00975
									RHE_RS18745												RHE_RS16425													SMc01121
									RHE_RS18705												RHE_RS16420													SMc03037
									RHE_RS18695												RHE_RS16330													SMc01336
									RHE_RS18675												RHE_RS16260													SMc02514
									RHE_RS18655												RHE_RS16210													SMc03013
									RHE_RS18615												RHE_RS16110													SMc01306
									RHE_RS18590												RHE_RS16040													SMc03832
									RHE_RS18580												RHE_RS16035													SMc04024
									RHE_RS18535												RHE_RS16030													SMc00590
									RHE_RS18505												RHE_RS15970													SM_b21523
									RHE_RS18480												RHE_RS15880													SMc03857
									RHE_RS18475												RHE_RS15870													SMc00375
									RHE_RS18380												RHE_RS15830													SMc02062
									RHE_RS18350												RHE_RS15805													SMc02264
									RHE_RS18325												RHE_RS15700													SMc01318
									RHE_RS18295												RHE_RS15665													SMc01321
									RHE_RS18225												RHE_RS15610													SMc00234
									RHE_RS18190												RHE_RS15590													SMc02487
									RHE_RS18180												RHE_RS15480													SMc00328
									RHE_RS18160												RHE_RS15440													SMc00433
									RHE_RS18145												RHE_RS15410													SMc00414
									RHE_RS18125												RHE_RS15395													SMc00573
									RHE_RS18110												RHE_RS15350													SMc03170	3
									RHE_RS18100												RHE_RS15240													SMc00860
									RHE_RS18090												RHE_RS15180													SMc01556
									RHE_RS18015												RHE_RS15160													SMc00493
									RHE_RS18010												RHE_RS15155													SM_b21183
									RHE_RS17980												RHE_RS15135													SMc01700
									RHE_RS17930												RHE_RS15050													SMc02681
									RHE_RS17915												RHE_RS14990													SMc04012
									RHE_RS17770												RHE_RS14870													SMc01289
									RHE_RS17765												RHE_RS14860													SMc00555
									RHE_RS17720												RHE_RS14810													SMc00070
									RHE_RS17710												RHE_RS14765													SMc00505
									RHE_RS17660												RHE_RS14760													SM_b20875
									RHE_RS17640												RHE_RS14750													SMc01726
									RHE_RS17605												RHE_RS14700
									RHE_RS17565												RHE_RS14675
									RHE_RS17405												RHE_RS14650
									RHE_RS17195												RHE_RS14575
									RHE_RS17190												RHE_RS14500
									RHE_RS17140												RHE_RS14485
									RHE_RS17115												RHE_RS14410
									RHE_RS17095												RHE_RS14395
									RHE_RS17085												RHE_RS14295
									RHE_RS17060												RHE_RS14280
									RHE_RS17045												RHE_RS14190
									RHE_RS17030												RHE_RS14170
									RHE_RS17020												RHE_RS14145
									RHE_RS17010												RHE_RS14140
									RHE_RS16945												RHE_RS14000
									RHE_RS16935												RHE_RS13970
									RHE_RS16870												RHE_RS13955
									RHE_RS16755												RHE_RS13930
									RHE_RS16735												RHE_RS13880
									RHE_RS16700												RHE_RS13835
									RHE_RS16675												RHE_RS13810
									RHE_RS16660												RHE_RS13775
									RHE_RS16615												RHE_RS13755
									RHE_RS16565												RHE_RS13735
									RHE_RS16530												RHE_RS13675
									RHE_RS16480												RHE_RS13630
									RHE_RS16350												RHE_RS13545
									RHE_RS16345												RHE_RS13525
									RHE_RS16325												RHE_RS13505
									RHE_RS16235												RHE_RS13495
									RHE_RS16220												RHE_RS13440
									RHE_RS16200												RHE_RS13430
									RHE_RS16185												RHE_RS13400
									RHE_RS16180												RHE_RS13340
									RHE_RS16115												RHE_RS13300
									RHE_RS15980												RHE_RS13275
									RHE_RS15965												RHE_RS13265
									RHE_RS15960												RHE_RS13255
									RHE_RS15950												RHE_RS13240
									RHE_RS15905												RHE_RS13220
									RHE_RS15885												RHE_RS13150
									RHE_RS15875												RHE_RS13115
									RHE_RS15835												RHE_RS13110
									RHE_RS15775												RHE_RS13090
									RHE_RS15725												RHE_RS13075
									RHE_RS15695												RHE_RS12975
									RHE_RS15650												RHE_RS12840
									RHE_RS15605												RHE_RS12810
									RHE_RS15585												RHE_RS12800
									RHE_RS15570												RHE_RS12765
									RHE_RS15560												RHE_RS12760
									RHE_RS15515												RHE_RS12605
									RHE_RS15500												RHE_RS12575
									RHE_RS15450												RHE_RS12440
									RHE_RS15430												RHE_RS12420
									RHE_RS15415												RHE_RS12380
									RHE_RS15385												RHE_RS12345
									RHE_RS15375												RHE_RS12340
									RHE_RS15360												RHE_RS12330
									RHE_RS15305												RHE_RS12285
									RHE_RS15215												RHE_RS12200
									RHE_RS15200												RHE_RS12125
									RHE_RS15195												RHE_RS12120
									RHE_RS15190												RHE_RS12090
									RHE_RS15185												RHE_RS11960
									RHE_RS15165												RHE_RS11905
									RHE_RS15125												RHE_RS11900
									RHE_RS15110												RHE_RS11625
									RHE_RS15025												RHE_RS11595
									RHE_RS15015												RHE_RS11520
									RHE_RS14985												RHE_RS11445
									RHE_RS14965												RHE_RS11360
									RHE_RS14885												RHE_RS11355
									RHE_RS14830												RHE_RS11295
									RHE_RS14820												RHE_RS11040
									RHE_RS14740												RHE_RS10990
									RHE_RS14720												RHE_RS10970
									RHE_RS14710												RHE_RS10940
									RHE_RS14695												RHE_RS10930
									RHE_RS14685												RHE_RS10885
									RHE_RS14645												RHE_RS10775
									RHE_RS14640												RHE_RS10750
									RHE_RS14615												RHE_RS10680
									RHE_RS14540												RHE_RS10490
									RHE_RS14515												RHE_RS10420
									RHE_RS14490												RHE_RS10410
									RHE_RS14475												RHE_RS10400
									RHE_RS14390												RHE_RS10390
									RHE_RS14375												RHE_RS10375
									RHE_RS14325												RHE_RS10365
									RHE_RS14315												RHE_RS09750
									RHE_RS14275												RHE_RS09670
									RHE_RS14215												RHE_RS09660
									RHE_RS14165												RHE_RS09505
									RHE_RS14050												RHE_RS09465
									RHE_RS14020												RHE_RS09410
									RHE_RS13980												RHE_RS09390
									RHE_RS13975												RHE_RS09265
									RHE_RS13960												RHE_RS09235
									RHE_RS13915												RHE_RS09225
									RHE_RS13820												RHE_RS09210
									RHE_RS13815												RHE_RS09165
									RHE_RS13805												RHE_RS09115
									RHE_RS13745												RHE_RS09090
									RHE_RS13740												RHE_RS09075
									RHE_RS13730												RHE_RS09030
									RHE_RS13580												RHE_RS09005
									RHE_RS13410												RHE_RS08980
									RHE_RS13345												RHE_RS08975
									RHE_RS13290												RHE_RS08960
									RHE_RS13195												RHE_RS08955
									RHE_RS13170												RHE_RS08895
									RHE_RS13135												RHE_RS08855
									RHE_RS13050												RHE_RS08770
									RHE_RS13025												RHE_RS08755
									RHE_RS13020												RHE_RS08370
									RHE_RS12970												RHE_RS08155
									RHE_RS12965												RHE_RS08145
									RHE_RS12925												RHE_RS08125
									RHE_RS12890												RHE_RS08095
									RHE_RS12615												RHE_RS07935
									RHE_RS12580												RHE_RS07845
									RHE_RS12560												RHE_RS07675
									RHE_RS12545												RHE_RS07440
									RHE_RS12540												RHE_RS07430
									RHE_RS12535												RHE_RS07425
									RHE_RS12525												RHE_RS07420
									RHE_RS12490												RHE_RS07235
									RHE_RS12355												RHE_RS07165
									RHE_RS12350												RHE_RS07145
									RHE_RS12220												RHE_RS07115
									RHE_RS12215												RHE_RS07055
									RHE_RS12185												RHE_RS06820
									RHE_RS12175												RHE_RS06730
									RHE_RS12170												RHE_RS06690
									RHE_RS12100												RHE_RS06680
									RHE_RS12095												RHE_RS06635
									RHE_RS12030												RHE_RS06495
									RHE_RS12025												RHE_RS06395
									RHE_RS11975												RHE_RS06380
									RHE_RS11955												RHE_RS06320
									RHE_RS11950												RHE_RS06290
									RHE_RS11945												RHE_RS06280
									RHE_RS11890												RHE_RS06265
									RHE_RS11870												RHE_RS06260
									RHE_RS11865												RHE_RS06210
									RHE_RS11855												RHE_RS06160
									RHE_RS11840												RHE_RS06095
									RHE_RS11820												RHE_RS06065
									RHE_RS11815												RHE_RS06055
									RHE_RS11805												RHE_RS06045
									RHE_RS11765												RHE_RS06030
									RHE_RS11685												RHE_RS05980
									RHE_RS11665												RHE_RS05965
									RHE_RS11645												RHE_RS05940
									RHE_RS11640												RHE_RS05850
									RHE_RS11635												RHE_RS05640
									RHE_RS11615												RHE_RS05560
									RHE_RS11590												RHE_RS05555
									RHE_RS11555												RHE_RS05465
									RHE_RS11540												RHE_RS05445
									RHE_RS11535												RHE_RS05425
									RHE_RS11525												RHE_RS05420
									RHE_RS11475												RHE_RS05340
									RHE_RS11465												RHE_RS05300
									RHE_RS11435												RHE_RS05140
									RHE_RS11415												RHE_RS05110
									RHE_RS11385												RHE_RS05085
									RHE_RS11380												RHE_RS04995
									RHE_RS11370												RHE_RS04985
									RHE_RS11300												RHE_RS04970
									RHE_RS11280												RHE_RS04700
									RHE_RS11265												RHE_RS04650
									RHE_RS11255												RHE_RS04555
									RHE_RS11250												RHE_RS04550
									RHE_RS11220												RHE_RS04545
									RHE_RS11205												RHE_RS04490
									RHE_RS11200												RHE_RS04340
									RHE_RS11195												RHE_RS04265
									RHE_RS11190												RHE_RS04225
									RHE_RS11185												RHE_RS04155
									RHE_RS11170												RHE_RS04115
									RHE_RS11145												RHE_RS04105
									RHE_RS11085												RHE_RS04040
									RHE_RS11060												RHE_RS03990
									RHE_RS11005												RHE_RS03950
									RHE_RS10975												RHE_RS03915
									RHE_RS10825												RHE_RS03770
									RHE_RS10805												RHE_RS03750
									RHE_RS10800												RHE_RS03645
									RHE_RS10795												RHE_RS03575
									RHE_RS10760												RHE_RS03465
									RHE_RS10745												RHE_RS03330
									RHE_RS10735												RHE_RS03170
									RHE_RS10725												RHE_RS03145
									RHE_RS10715												RHE_RS03110
									RHE_RS10710												RHE_RS03045
									RHE_RS10660												RHE_RS02975
									RHE_RS10650												RHE_RS02890
									RHE_RS10645												RHE_RS02830
									RHE_RS10550												RHE_RS02800
									RHE_RS10540												RHE_RS02790
									RHE_RS10520												RHE_RS02680
									RHE_RS10515												RHE_RS02645
									RHE_RS10345												RHE_RS02640
									RHE_RS10285												RHE_RS02595
									RHE_RS10265												RHE_RS02580
									RHE_RS10095												RHE_RS02570
									RHE_RS09995												RHE_RS02555
									RHE_RS09990												RHE_RS02490
									RHE_RS09970												RHE_RS02430
									RHE_RS09875												RHE_RS02425
									RHE_RS09865												RHE_RS02420
									RHE_RS09860												RHE_RS02395
									RHE_RS09845												RHE_RS02385
									RHE_RS09835												RHE_RS02330
									RHE_RS09800												RHE_RS02290
									RHE_RS09790												RHE_RS02230
									RHE_RS09785												RHE_RS02195
									RHE_RS09770												RHE_RS02190
									RHE_RS09730												RHE_RS02140
									RHE_RS09725												RHE_RS02135
									RHE_RS09720												RHE_RS02130
									RHE_RS09700												RHE_RS01975
									RHE_RS09695												RHE_RS01930
									RHE_RS09690												RHE_RS01790
									RHE_RS09650												RHE_RS01780
									RHE_RS09625												RHE_RS01775
									RHE_RS09605												RHE_RS01655
									RHE_RS09595												RHE_RS01645
									RHE_RS09575												RHE_RS01495
									RHE_RS09570												RHE_RS01465
									RHE_RS09565												RHE_RS01390
									RHE_RS09535												RHE_RS01355
									RHE_RS09515												RHE_RS01345
									RHE_RS09500												RHE_RS01340
									RHE_RS09475												RHE_RS01300
									RHE_RS09405												RHE_RS01185
									RHE_RS09360												RHE_RS01170
									RHE_RS09355												RHE_RS01125
									RHE_RS09325												RHE_RS00850
									RHE_RS09310												RHE_RS00815
									RHE_RS09290												RHE_RS00730
									RHE_RS09255												RHE_RS00690
									RHE_RS09250												RHE_RS00580
									RHE_RS09175												RHE_RS00490
									RHE_RS09160												RHE_RS00280
									RHE_RS09020												RHE_RS00195
									RHE_RS08995
									RHE_RS08970
									RHE_RS08965
									RHE_RS08915
									RHE_RS08765
									RHE_RS08700
									RHE_RS08685
									RHE_RS08675
									RHE_RS08660
									RHE_RS08630
									RHE_RS08570
									RHE_RS08560
									RHE_RS08550
									RHE_RS08540
									RHE_RS08535
									RHE_RS08525
									RHE_RS08455
									RHE_RS08430
									RHE_RS08410
									RHE_RS08405
									RHE_RS08385
									RHE_RS08320
									RHE_RS08300
									RHE_RS08260
									RHE_RS08240
									RHE_RS08215
									RHE_RS08205
									RHE_RS08160
									RHE_RS08150
									RHE_RS08130
									RHE_RS08090
									RHE_RS08085
									RHE_RS08080
									RHE_RS08065
									RHE_RS08055
									RHE_RS08035
									RHE_RS07975
									RHE_RS07800
									RHE_RS07760
									RHE_RS07755
									RHE_RS07750
									RHE_RS07690
									RHE_RS07670
									RHE_RS07645
									RHE_RS07595
									RHE_RS07590
									RHE_RS07510
									RHE_RS07380
									RHE_RS07365
									RHE_RS07350
									RHE_RS07330
									RHE_RS07305
									RHE_RS07300
									RHE_RS07295
									RHE_RS07290
									RHE_RS07285
									RHE_RS07275
									RHE_RS07245
									RHE_RS07240
									RHE_RS07205
									RHE_RS07140
									RHE_RS07075
									RHE_RS07070
									RHE_RS07065
									RHE_RS07050
									RHE_RS07015
									RHE_RS07005
									RHE_RS06960
									RHE_RS06895
									RHE_RS06880
									RHE_RS06860
									RHE_RS06725
									RHE_RS06700
									RHE_RS06685
									RHE_RS06660
									RHE_RS06655
									RHE_RS06640
									RHE_RS06590
									RHE_RS06565
									RHE_RS06560
									RHE_RS06435
									RHE_RS06410
									RHE_RS06345
									RHE_RS06325
									RHE_RS06305
									RHE_RS06240
									RHE_RS06235
									RHE_RS06200
									RHE_RS06070
									RHE_RS06050
									RHE_RS06005
									RHE_RS06000
									RHE_RS05950
									RHE_RS05935
									RHE_RS05865
									RHE_RS05820
									RHE_RS05780
									RHE_RS05725
									RHE_RS05655
									RHE_RS05615
									RHE_RS05570
									RHE_RS05515
									RHE_RS05450
									RHE_RS05335
									RHE_RS05260
									RHE_RS05220
									RHE_RS05195
									RHE_RS05190
									RHE_RS05185
									RHE_RS05175
									RHE_RS05105
									RHE_RS05065
									RHE_RS04955
									RHE_RS04950
									RHE_RS04885
									RHE_RS04855
									RHE_RS04835
									RHE_RS04735
									RHE_RS04720
									RHE_RS04595
									RHE_RS04590
									RHE_RS04570
									RHE_RS04535
									RHE_RS04510
									RHE_RS04500
									RHE_RS04485
									RHE_RS04465
									RHE_RS04455
									RHE_RS04435
									RHE_RS04420
									RHE_RS04380
									RHE_RS04375
									RHE_RS04370
									RHE_RS04350
									RHE_RS04235
									RHE_RS04190
									RHE_RS04150
									RHE_RS04120
									RHE_RS04100
									RHE_RS04090
									RHE_RS04080
									RHE_RS04070
									RHE_RS04060
									RHE_RS04020
									RHE_RS04015
									RHE_RS03995
									RHE_RS03980
									RHE_RS03970
									RHE_RS03890
									RHE_RS03870
									RHE_RS03790
									RHE_RS03695
									RHE_RS03680
									RHE_RS03640
									RHE_RS03635
									RHE_RS03620
									RHE_RS03615
									RHE_RS03580
									RHE_RS03545
									RHE_RS03520
									RHE_RS03505
									RHE_RS03500
									RHE_RS03490
									RHE_RS03485
									RHE_RS03450
									RHE_RS03405
									RHE_RS03390
									RHE_RS03380
									RHE_RS03315
									RHE_RS03290
									RHE_RS03205
									RHE_RS03195
									RHE_RS03030
									RHE_RS03025
									RHE_RS02955
									RHE_RS02910
									RHE_RS02850
									RHE_RS02810
									RHE_RS02780
									RHE_RS02770
									RHE_RS02750
									RHE_RS02695
									RHE_RS02675
									RHE_RS02635
									RHE_RS02620
									RHE_RS02615
									RHE_RS02610
									RHE_RS02560
									RHE_RS02365
									RHE_RS02320
									RHE_RS02235
									RHE_RS02120
									RHE_RS02115
									RHE_RS02080
									RHE_RS02075
									RHE_RS02060
									RHE_RS02055
									RHE_RS02015
									RHE_RS01925
									RHE_RS01870
									RHE_RS01855
									RHE_RS01845
									RHE_RS01815
									RHE_RS01735
									RHE_RS01700
									RHE_RS01630
									RHE_RS01550
									RHE_RS01545
									RHE_RS01540
									RHE_RS01360
									RHE_RS01320
									RHE_RS01315
									RHE_RS01260
									RHE_RS01160
									RHE_RS01155
									RHE_RS01135
									RHE_RS01080
									RHE_RS01075
									RHE_RS01055
									RHE_RS01035
									RHE_RS01020
									RHE_RS01005
									RHE_RS00995
									RHE_RS00990
									RHE_RS00895
									RHE_RS00885
									RHE_RS00880
									RHE_RS00870
									RHE_RS00760
									RHE_RS00745
									RHE_RS00740
									RHE_RS00735
									RHE_RS00705
									RHE_RS00700
									RHE_RS00695
									RHE_RS00680
									RHE_RS00670
									RHE_RS00595
									RHE_RS00575
									RHE_RS00550
									RHE_RS00525
									RHE_RS00480
									RHE_RS00475
									RHE_RS00465
									RHE_RS00460
									RHE_RS00410
									RHE_RS00365
									RHE_RS00300
									RHE_RS00275
									RHE_RS00255
									RHE_RS00190
									RHE_RS00155
									RHE_RS00105
									RHE_RS00070
									RHE_RS00065
									RHE_RS00045
									RHE_RS00040
									RHE_RS00015
